# Supplementary material for: Inactivation of Tumor Suppressor CYLD Inhibits Fibroblast Reprogramming to Pluripotency
Source: Cancers (Basel). 2023 Oct 15;15(20):4997. doi: 10.3390/cancers15204997 (PMC10605754; doi:10.3390/cancers15204997)
Supplement: Supplementary file 1 [file cancers-15-04997-s001.zip]

Archive with 4 entries (4 files):
- supp_table S2.xlsx
- supp_table S3.xlsx
- supp_table S4.xlsx
- supplementary figures and Table S1.pdf
