# Supplementary material for: Inactivation of Tumor Suppressor CYLD Inhibits Fibroblast Reprogramming to Pluripotency
Source: Cancers (Basel). 2023 Oct 15;15(20):4997. doi: 10.3390/cancers15204997 (PMC10605754; doi:10.3390/cancers15204997)
Supplement: Supplementary file 1 [file cancers-15-04997-s001.zip › supp_table S2.xlsx]

## Sheet: zscore_total
		Δ9 D4						Δ9 D3						Δ9 D0						WT D4								WT D3							WT D0
		Δ9 b2_1		Δ9 b2_2		Δ9 b3		Δ9 b2_1		Δ9 b2_2		Δ9 b3		Δ9 b2_1		Δ9 b2_2		Δ9 b3		WT b2_1		WT b2_2			WT b3			WT b2_1			WT b2_2		WT b3		WT b2_1		WT b2_2		WT b3
Proteins	significance	305_2	305_1	304_2	304_1	303_2	303_1	302_2	302_1	301_2	301_1	300_2	300_1	299_2	299_1	298_2	298_1	297_2	297_1	296_2	296_1	295_3	295_2	295_1	294_3	294_2	294_1	293_3	293_2	293_1	292_2	292_1	291_2	291_1	290_2	290_1	289_2	289_1	288_3	288_2	288_1
0610012G03Rik	+	1.1916	1.1698	1.23636	1.23536	0.97358	1.18228	1.237	1.31808	0.701389	0.910744	1.03826	0.83261	-1.25987	-0.859527	-0.29204	-0.351574	-0.665144	-0.674649	0.166412	0.223477	0.182404	0.402454	0.257669	0.521844	0.2517	0.196376	-0.18966	-0.253901	-0.297182	0.0860644	0.276585	0.274598	0.511383	-1.88197	-2.09366	-1.57272	-1.946	-1.56061	-1.22485	-1.25467
2200002D01Rik	+	-0.838326	-1.05124	-1.09884	-1.1877	-1.33279	-0.896435	-1.49475	-1.4503	-1.59727	-1.1904	-1.16261	-1.40478	-0.444051	-0.0579052	-1.04139	-0.80373	0.255595	0.379423	1.02855	1.07877	1.20855	1.1034	1.25041	1.37174	1.48887	1.30653	0.536073	0.678463	0.726771	0.762495	0.766702	0.716728	0.868661	0.282705	0.305796	-0.662111	-0.459491	0.662732	0.748712	0.646447
2210016F16Rik	+	-0.270574	-0.048021	-0.296559	-0.282479	-0.786516	-0.457865	0.217351	-0.0627856	0.383437	-0.538057	-0.53607	-0.652527	-2.27055	-0.0626482	1.03907	-1.76297	-1.23474	-0.508538	0.975623	0.744733	0.857086	0.929184	1.16308	0.763443	1.05163	0.760959	0.720378	0.782121	0.577151	0.919694	1.09783	0.688492	0.605721	-2.51969	0.162381	-2.75898	-0.41206	0.290479	0.427023	0.304768
2310061I04Rik	+	1.32768	1.42085	1.32178	1.34836	0.766315	0.794015	0.97105	1.35164	0.644452	0.825175	0.796303	0.980195	-0.420599	-0.963523	-1.02012	-0.853106	0.336325	0.382261	-0.402984	-0.0956908	0.0380746	-0.262543	-0.31486	0.243423	0.28125	0.149291	-0.0906776	-0.244114	-0.113588	-0.171618	-0.600673	0.127138	0.284263	0.229326	-1.08117	-0.50136	0.023499	-2.99093	-2.54014	-1.97497
2700097O09Rik	+	-0.140641	-0.0565993	0.0151358	-0.168221	-1.16161	0.0468796	-1.05936	-0.590254	-0.775303	-2.7216	-1.75563	-1.18787	-1.30446	0.903705	-1.00255	-0.521426	0.665531	0.12102	0.739139	0.488694	1.18455	0.882938	0.678449	1.0905	1.11572	1.25168	0.914304	0.586201	1.32164	0.906826	0.783018	0.884836	1.16251	-0.0260835	-1.66685	-0.56726	0.941159	-0.753898	-0.346049	-0.878762
4930522L14Rik	+	1.03279	-0.33679	-1.43903	-0.585154	0.767404	-0.191021	-1.32158	-0.0126504	0.396472	-1.25727	-0.17404	-0.388137	-1.08288	0.0548918	-0.288671	0.928643	-0.212948	0.435996	1.25053	-0.627066	-0.305833	-1.82021	0.638847	-1.46248	-1.8302	-0.35584	0.345481	2.12269	0.644696	-1.34963	0.246422	-0.866181	0.487597	1.32332	2.44042	0.770326	0.476681	0.234344	0.553904	0.756142
4931408C20Rik	+	0.155226	0.448715	0.387375	0.320407	0.388531	0.357593	0.525241	0.53407	0.596559	0.518105	0.542387	0.544554	-2.73617	0.204187	0.434063	-2.56796	0.353721	0.347285	0.326049	0.428377	0.292016	0.28156	0.355515	0.339058	0.289016	0.319112	0.253	0.181068	0.261931	0.179356	0.109754	0.30785	0.408399	-2.29952	0.958671	0.387473	0.437838	-2.6019	-2.68792	0.119409
A2m	+	-0.867287	-1.10842	-1.15368	-1.11048	-1.23375	-0.957958	-0.982163	-0.972536	-0.897527	-1.17412	-1.12901	-0.963264	-0.229504	0.0826274	-0.553494	-0.701644	0.254633	0.134712	-0.0203228	-0.181794	0.00837364	-0.0887978	0.0842409	0.489774	0.646168	0.451998	-0.207756	-0.444901	-0.204676	-0.00942524	-0.181794	0.392525	0.309339	2.12287	2.11195	1.28435	1.18294	1.91556	1.98217	1.92007
Aaas	+	1.49917	1.45801	1.18011	1.43292	1.4183	1.32697	1.27078	1.34528	1.17356	0.94873	1.3426	1.35708	-0.277896	-0.0669245	-0.0618257	-0.127638	-0.409599	-0.109882	-0.160376	0.0548539	-0.266838	-0.490124	-0.678537	-0.622454	-0.344327	-0.595875	-0.316837	-0.103059	-0.362858	-0.192007	-0.523955	-0.189672	-0.132597	-1.09641	-1.01036	-0.867988	-0.881323	-1.85705	-1.85809	-2.20386
Aacs	+	0.183503	0.183584	0.0896178	0.0826785	0.165662	0.158621	0.156008	0.132902	0.300415	0.186172	0.252005	0.0794843	-1.93292	-1.89404	-2.00384	-2.05426	-1.91553	-2.06257	0.909335	0.982821	0.957581	0.904318	0.926663	0.909715	0.886403	0.907786	0.646868	0.665811	0.609102	0.743666	0.809049	1.04099	1.03522	-0.75957	-0.617382	-1.25168	-1.03438	0.157514	0.22356	0.239115
Aagab	+	-0.917065	-0.123767	-0.904517	-0.811227	-1.41546	-0.816391	-1.19857	-0.589639	-1.03252	-1.05188	-0.916065	-0.409063	-1.18065	-1.2229	-1.42182	-1.58686	-0.807241	-0.332993	1.26971	1.14056	1.44147	1.26338	1.33153	0.930313	0.961445	1.2142	0.641153	0.752017	0.843354	0.684905	1.11377	0.811165	0.823446	-0.255871	-0.932287	-0.000781006	-0.449031	0.905976	1.1067	1.1415
Aak1	+	-1.00772	-1.08549	-1.28872	-0.673757	-1.19547	-1.35093	-0.91508	-1.09052	-1.35681	-1.33495	-0.849239	-1.08567	-0.755238	-0.589546	-1.16332	-0.681019	-0.690577	-0.680852	0.598246	0.531791	0.489602	0.544203	0.695933	1.20351	1.69633	1.62639	0.221986	-0.133921	0.514705	0.0209638	-0.106737	1.06676	0.994322	0.764569	1.34231	1.37129	0.870836	1.21607	0.9936	1.27218
Aamp	+	0.279842	0.399864	0.605989	0.471114	0.406052	0.343416	0.383025	0.32568	0.0119499	0.246278	0.206777	0.247542	-2.0734	-2.01995	-2.02595	-2.05202	-2.00113	-1.85916	0.767209	0.831852	0.636171	0.61944	0.955446	0.508688	0.603197	0.581332	0.918807	0.708038	0.839309	0.794011	0.872118	0.909918	0.796217	-0.982907	-0.780292	-1.22541	-1.07847	0.240191	0.308639	0.280586
Aars1	+	-0.716272	-0.712808	-0.489533	-0.537193	-0.727149	-0.647884	-0.245247	-0.373539	-0.468651	-0.408291	-0.43368	-0.38579	-1.70713	-1.50602	-1.55229	-1.64032	-1.55991	-1.4735	1.06642	1.08741	0.938436	0.945172	0.996632	0.780004	0.831421	0.750684	0.959508	0.916576	0.938982	0.873438	0.949893	1.02476	1.06765	-0.0305496	0.0959061	-1.16639	-1.1423	1.24321	1.25608	1.20226
Aars2	+	0.920284	1.00148	0.81663	0.837905	1.03603	1.05203	0.80488	0.670609	0.705555	0.586055	0.823991	0.686484	0.714179	0.713422	0.239772	0.155745	0.561704	0.287514	0.0558002	-0.0495663	0.0050824	0.264331	0.262954	-0.724178	-0.375684	-0.180612	0.22121	0.12848	0.0921227	0.0181819	-0.00814963	0.365861	0.559456	-1.68306	-1.03113	-1.70915	-1.20668	-2.63332	-2.42112	-2.56509
Aarsd1	+	-0.482397	-0.528463	-0.289883	-0.392654	-0.422955	-0.00788466	-0.350094	-0.172175	-0.935075	-0.530078	-0.358145	-0.494931	-0.738724	-1.25477	-1.06112	-1.33365	-1.66069	-3.30069	0.941452	0.864471	0.931882	0.962952	0.961128	0.888897	0.824547	0.718289	1.11337	1.19873	1.03288	1.05029	1.24045	1.21513	1.11581	-0.202512	-0.456693	-1.08946	-0.396863	0.444256	0.379613	0.575766
Aasdhppt	+	0.187927	0.134448	0.14067	0.332215	-0.0148456	0.0321441	-0.351307	-0.118533	0.488573	0.0646413	0.0880906	-0.0489878	-1.78746	-1.79016	-2.66453	-2.25386	-1.82573	-1.4365	0.85836	0.843048	0.847434	0.874441	0.941584	1.12293	0.969266	0.911264	0.906736	0.624718	1.04128	0.814407	0.774707	1.15543	1.13434	-0.671287	-0.357939	-0.583893	-0.253517	-0.44032	-0.384875	-0.304901
Aatf	+	1.30953	1.28176	1.53244	1.65496	1.36534	1.28848	1.09555	1.07463	0.545336	0.686765	0.729624	0.624121	-0.442685	-0.0386639	-0.284773	-0.318079	-0.21302	-0.0104242	0.00598043	0.0315893	-0.214269	0.0754686	-0.103312	-0.465642	-0.529377	-0.398788	0.381508	0.352438	0.396496	0.134546	0.204987	0.174546	0.206116	-1.92221	-1.91214	-1.73771	-1.77308	-1.77619	-1.69933	-1.31253
Abat	+	-0.16771	-0.0751525	0.0403787	0.0535327	-0.0969418	-0.108643	0.200693	-0.0431634	0.320434	0.250904	0.111659	0.221511	0.917917	1.16056	0.755981	0.883424	0.798972	0.981326	-2.10067	-2.22954	-1.42291	-0.491776	-1.2693	0.0625741	-0.283934	-0.622151	-0.84253	-1.27229	-1.11408	-0.76592	0.0662508	-1.38943	0.917692	1.75263	1.29485	1.21141	1.45195	1.16473	1.08924	-1.41247
Abca1	+	-1.23161	-0.747975	-0.58323	-0.401456	-0.734947	-0.76643	0.947722	0.772077	0.0870884	0.210932	0.798591	0.89701	0.999257	0.222939	0.230598	0.413191	-2.441	1.30558	-0.224627	-1.03875	-0.261067	0.331922	-0.799658	-0.0444555	-0.197507	0.45654	-0.0633933	-1.62258	-1.1766	-0.00939341	1.70636	-2.02991	2.15237	0.170874	1.23168	0.884219	1.20883	-0.2793	-1.06754	0.693632
Abcb10	+	1.25669	1.21271	1.28316	1.18822	1.33905	1.33094	1.04022	1.07302	1.25672	1.21308	1.11195	1.17866	-0.150584	-0.204954	-0.248963	-0.301087	-0.568388	-0.537886	0.13574	0.074454	0.100765	0.067577	0.162541	-0.198584	-0.244614	-0.155811	-0.766532	-0.684892	-0.847809	-0.398252	-0.493327	0.314653	0.256861	-0.442604	-1.1941	-0.558672	-0.872924	-2.51914	-2.38797	-1.81991
Abcb1a	+	1.21981	0.411086	0.902352	0.428007	0.57749	0.502311	1.27088	0.0026242	0.35603	0.217583	-1.40162	0.20468	-1.64516	-1.49272	-1.46038	-1.55123	-1.54617	-0.747406	0.766347	0.613382	0.909853	0.875353	0.783262	1.14593	1.13926	1.10377	0.770122	0.411547	0.809671	0.607636	0.449327	0.637601	0.684515	-1.09367	-0.716271	-1.5257	-1.33698	-1.11658	-1.44262	-0.72391
Abcb1b	+	1.5504	1.36394	1.20585	1.17697	1.28606	1.21428	0.866332	0.774568	1.03286	0.952413	0.828691	0.711267	-0.553077	-0.564583	-1.26625	-1.24372	-0.412431	-0.612176	0.225128	0.241175	0.1675	0.189642	0.266197	0.436857	0.713315	0.403425	-0.245525	-0.219968	-0.295059	-0.0542868	0.0750432	0.0911256	0.094702	-1.55092	-0.494994	-0.833344	-0.974283	-2.12904	-2.11656	-2.30153
Abcb6	+	-1.38422	0.258799	-1.34785	1.17853	-0.788507	1.17352	0.555014	0.461652	0.53498	0.306745	0.933718	0.354661	-1.01723	-0.530305	-1.76804	-1.34179	-0.940512	-1.10294	0.685698	-0.0354226	1.15327	0.631824	0.616408	0.098148	-1.06707	0.240442	1.06389	0.950565	1.30558	0.717372	0.554038	1.01665	1.65474	-0.963153	-1.52594	-0.222118	-0.281419	0.931472	-1.02453	-2.03665
Abcb7	+	1.1839	0.877076	1.63268	1.48213	1.18558	0.831645	0.98737	0.729498	-0.0870537	-0.156479	0.149159	0.0185552	-1.42786	-2.67328	-1.22588	-1.14822	-0.895585	-0.615454	0.122459	0.021131	0.66249	0.616366	0.55048	0.858375	0.693162	0.441506	-0.12442	-0.0380648	0.0695862	0.483794	0.556755	0.675461	0.586853	-0.845488	-0.793486	-0.149796	0.0891106	-1.32243	-2.19376	-1.80787
Abcb8	+	0.415935	0.382756	0.0595158	-0.0985649	0.468088	0.672836	0.601074	0.67439	0.397479	0.888795	0.612029	0.581145	-1.88121	0.319297	-0.93312	0.724305	0.469527	-1.81636	1.04696	0.849495	0.640056	0.845476	1.00385	0.242347	-0.774175	-0.65106	0.864826	0.851169	0.839522	0.713552	0.722084	0.717196	0.436445	-1.14895	-1.6707	-1.41481	-1.71498	-0.907588	-2.128	-1.90064
Abcc1	+	0.757803	0.788405	0.0222149	-0.0178328	0.370671	0.360944	0.548142	0.832496	0.889992	0.810387	0.85252	0.820852	1.49445	1.7232	1.42716	1.58977	1.37042	1.40867	-0.380622	-0.385929	-0.529708	-0.556087	-0.236532	-0.365971	-0.288535	-0.35731	-1.64182	-1.59715	-1.77623	-1.5421	-1.45583	-0.998475	-1.12445	0.178021	-0.0772994	-0.0604681	0.33956	-0.991863	-1.26663	-0.934828
Abcc3	+	-0.27412	-1.37824	2.27619	-1.69035	-0.862727	-0.595682	0.12372	0.207862	1.9041	-0.0616918	0.733699	0.221561	0.695694	0.686574	1.81243	1.38686	0.603793	0.768321	0.140376	0.00912192	-1.26543	0.277558	-0.258346	0.496565	-1.34425	0.310506	0.496964	-1.34018	-1.28328	0.70368	-0.830355	-0.137988	0.58996	0.0238937	-2.36534	-0.65368	-0.148578	-0.910365	0.342299	0.588881
Abcc4	+	0.928352	0.841558	0.836849	0.744008	0.884401	0.858625	0.645218	0.705033	0.677858	0.591997	0.687632	0.638888	-0.60886	-0.29871	-0.620869	0.0240969	-0.239476	-0.0108912	0.716744	0.479088	0.438704	0.545962	0.595545	0.564296	0.593519	0.349208	-0.110502	-0.00551919	0.312847	0.404189	0.290063	0.275136	0.49423	-2.47687	-2.10865	-0.715533	-1.15425	-1.88859	-2.15575	-2.72957
Abcc5	+	0.722898	-0.0409246	0.182528	0.119391	-0.169626	-0.0674353	-0.327041	0.66403	0.337949	0.293868	-0.245108	-0.15289	0.397962	0.625348	-0.235618	-0.361078	0.967493	-0.228219	-0.208639	-0.696181	0.694632	0.332072	0.93079	1.27408	1.26653	1.39056	-2.06604	-2.97866	-2.30561	-1.47391	-1.08907	0.0598362	1.32845	0.377196	0.616937	1.83708	-0.13991	-0.872016	-0.116498	-0.645159
Abcd1	+	-0.121247	-0.319113	0.245223	0.591882	0.00744244	0.405571	0.556382	0.315524	-0.460553	-0.177842	0.944679	0.768888	-0.200882	0.395896	0.332488	1.02365	-0.0883507	-0.165118	0.328655	0.108083	0.474855	-0.940566	0.520349	-4.09676	-2.27551	-2.22298	-0.627186	0.050184	0.0612666	0.385045	-0.961662	0.363	0.583826	0.987314	1.22183	0.36528	-0.279962	0.162267	1.19775	0.540405
Abcd3	+	-0.122402	0.0945579	0.806192	1.60954	-0.112348	-0.127491	0.403331	0.637879	-0.825729	-0.336451	-0.51701	-0.168898	0.613901	0.888753	1.87843	2.22709	2.08954	1.70686	-1.05193	-0.947464	-0.765556	-0.300715	0.0873599	-0.578827	-0.674996	-0.655669	-1.75036	-1.46735	-1.86919	-0.967442	-1.39521	0.52869	0.82493	0.437198	0.5642	-0.173473	-0.174233	-0.161015	-0.0251436	-0.22957
Abcd4	+	0.506009	0.744929	0.0449627	0.310401	1.12073	0.93108	0.944681	1.25643	0.651072	0.738532	0.974346	1.16767	0.615921	0.465263	0.792166	0.896731	1.13523	1.02044	-0.169495	-0.54267	-0.82353	-2.33958	-1.13682	1.57915	-1.31878	0.237198	-0.0789304	-0.600575	-1.27521	-0.352454	-1.98708	-0.306237	-0.508624	-1.22423	0.0584406	-1.08624	0.689765	-1.28854	-0.262585	-1.57957
Abce1	+	-0.00591189	0.0848498	0.111752	0.035889	-0.0355049	-0.000512269	0.0418223	-0.0122498	0.0244019	-0.0421741	-0.120351	-0.00727507	-2.07714	-1.85797	-2.2047	-2.13853	-1.53936	-1.71087	1.00303	0.947032	0.95753	0.987275	0.945158	0.971357	0.870972	0.936255	1.05894	0.997586	0.969353	1.02048	1.08002	0.813971	0.823108	-0.591322	-0.712625	-0.866928	-0.981496	0.0676343	0.0475305	0.108967
Abcf1	+	0.059684	0.179169	0.722316	0.632066	0.294389	0.370747	0.118418	0.0697828	-0.192342	-0.11972	-0.126651	-0.2881	-1.79568	-1.83227	-2.30153	-2.06742	-1.04447	-1.0541	1.09485	1.04695	0.958572	0.940723	1.05909	0.934629	0.936943	0.738584	0.947024	0.941908	0.980444	1.06473	0.987128	0.789554	0.92654	-1.28146	-0.931063	-0.96117	-0.840222	-0.542796	-0.768112	-0.647146
Abcf2	+	0.494436	0.572349	-0.020298	0.28372	0.609673	0.653689	0.559303	0.589266	0.380651	0.513329	0.512009	0.488951	-1.51504	-1.31876	-2.21805	-2.29077	-1.13462	-1.09057	1.27571	1.22656	0.79457	0.833671	0.809677	-0.0761708	-0.109081	-0.074656	1.11303	0.920772	1.08943	0.931923	1.02175	0.789356	0.688201	-0.781061	-0.876817	-1.22791	-0.85962	-1.32052	-1.17476	-1.06331
Abcf3	+	0.12126	-0.2817	0.429548	0.321688	-0.0859261	0.0342734	-0.207097	-0.0770853	-0.0782564	-0.113539	-0.4046	-0.332528	-2.20267	-2.06741	-2.24969	-2.31945	-1.16938	-1.36975	1.03268	1.27923	1.11642	1.13561	0.900988	1.19098	1.09982	1.35279	0.0539095	-0.247485	0.0149218	0.511137	0.510365	1.01085	1.04559	-0.310361	-0.451483	-0.7484	-0.371342	0.678356	0.553051	0.694704
Abcg2	+	0.839696	0.502295	-0.11385	-0.208355	0.486481	0.8951	1.24778	0.629687	1.2132	1.24489	-0.173529	-0.0357251	-0.177931	-0.503129	-1.36173	-1.45252	-1.3717	-1.58538	0.452782	-0.717735	0.461606	0.348558	0.489329	0.594792	0.035717	1.15054	-1.1344	-2.0905	-1.37551	-0.934412	-1.09599	-0.912742	-1.46634	0.9744	0.666311	1.61815	1.72624	0.558539	0.640652	-0.0652745
Abhd10	+	1.32836	1.16036	0.4868	0.0651785	0.994372	1.04792	1.5107	1.37454	1.29875	1.42124	1.25673	1.53293	0.375732	0.268349	-0.631686	-0.949033	-0.53801	-1.30287	0.0454794	-0.0457228	-0.026409	-0.227139	-0.830079	0.456988	0.294989	-0.0793411	-0.387627	-0.559153	-0.632153	0.300021	-0.676365	0.0458508	-0.316777	-0.0429418	-0.639317	-0.609	-0.394839	-1.75426	-3.01652	-1.60604
Abhd11	+	0.928023	0.89374	1.13839	1.51725	0.799072	0.890582	1.04337	0.971034	0.646533	0.528488	0.817358	0.747697	-1.44416	-1.25672	-1.30905	-0.832071	-1.02128	-1.16988	0.49927	0.388326	0.37794	0.346903	0.440799	0.523861	0.424619	0.426507	0.375352	0.201563	0.333168	0.389875	0.416227	0.758534	0.660721	-0.878954	-1.19998	-1.48792	-1.5754	-1.45638	-2.3103	-1.54312
Abhd12	+	0.220597	0.0808232	-0.377701	-0.407157	-0.116518	-0.188473	0.0693738	0.25993	0.517137	0.160558	-0.109655	0.343149	1.72301	1.50813	1.38455	1.57326	1.67536	1.7447	-0.441218	-0.749504	-0.43761	-0.774285	-1.07955	-0.730653	-0.476489	-0.82446	-1.47834	-1.7739	-2.04147	-1.19414	-1.26545	-0.156816	0.0299075	1.11665	0.951057	1.39466	1.07384	-0.147092	-0.715883	-0.340336
Abhd14b	+	-0.0793959	0.378824	-0.445707	0.159647	-0.193178	0.80625	0.717938	0.0873236	-1.34627	0.3116	-0.103029	-0.00754086	-1.47866	-1.39888	-1.50385	-1.81951	-0.979582	-0.611498	0.989194	1.00677	0.867346	0.923852	0.979037	1.02398	1.05953	1.14421	1.07181	1.04017	1.04687	0.920185	0.865056	0.52675	0.684717	-1.58748	-1.07515	-1.8713	-1.44972	0.498174	-1.10024	-0.058221
Abhd16a	+	0.0906102	0.297587	-0.395361	-0.57328	0.0673322	0.721871	0.956632	1.28676	0.219166	0.515658	1.19659	0.880595	1.90591	1.74556	1.41965	1.89921	-0.0951651	0.93401	-0.317331	-0.500008	-0.25404	0.0517779	0.00152436	-1.02338	-0.387429	-0.478945	-1.88541	-1.15072	-2.43065	-0.872454	-0.923004	0.79315	0.191521	-0.351657	-0.660214	0.51832	-0.170773	-0.627074	-1.50448	-1.09206
Abhd17b	+	1.65311	1.74279	1.48616	1.46182	0.838131	0.920966	-0.105204	-0.141454	0.754961	0.500216	0.653591	1.08164	-0.0471729	0.167212	0.45943	0.407454	0.448372	-0.232373	-1.26241	-0.680634	-0.582898	-2.05252	-1.06298	0.769508	0.636434	0.635803	-0.376907	0.148658	0.284361	-0.655708	-1.4514	-0.2815	-1.02535	0.595065	-0.297143	-0.0566006	0.216451	-2.30608	-1.84365	-1.40016
Abhd4	+	0.641782	0.908616	0.975518	0.568737	0.878818	0.578843	1.33474	0.837116	0.608183	0.901973	0.953005	1.2427	-0.722236	-1.28239	-1.74364	-2.15207	-1.15299	-3.56643	0.262288	0.172519	0.491366	-0.259454	-0.186265	0.247156	0.521997	0.0426318	-0.463855	-0.461827	-0.348308	-0.0908138	-0.438807	0.191164	-0.0922115	-0.18471	1.7672	0.23026	-0.154104	-0.691873	-0.0747541	-0.289875
Abhd5	+	0.654421	0.799616	1.54082	0.951722	0.936989	0.626908	0.656056	0.821381	0.222881	0.301335	-0.255476	-0.363178	-1.45246	-0.747398	-2.54652	-2.63189	-0.331906	-0.496405	-0.0414649	-0.0736356	0.516609	0.628159	0.422713	1.07384	1.34791	1.30176	-0.0578353	-0.0566423	-0.00797046	0.321852	-0.012378	1.20399	1.34018	-1.32564	-1.05771	-0.592236	-0.939688	-0.833162	-0.670379	-1.17518
Abi1	+	-0.511975	-0.343473	-0.353227	-0.258679	-0.312006	-0.446268	-0.403776	-0.519851	-0.360454	-0.291736	-0.309294	-0.249727	-1.1544	-1.25375	-2.16361	-2.3613	-0.91982	-1.13871	1.16262	1.30069	1.29087	1.30685	1.24438	1.73035	1.70959	1.57988	0.57304	0.528669	0.742418	0.61843	0.560676	0.844374	0.782156	-0.420088	-1.1863	-0.733744	-0.530234	-0.0720415	0.127567	0.191931
Abi2	+	-1.5155	0.417122	-1.73119	0.0337696	-1.7184	0.625551	-1.80769	-1.65697	0.636998	-1.07277	0.583834	-1.23098	0.549274	-1.40372	0.737221	-1.82524	-1.25195	0.681537	0.649081	0.66563	0.662093	0.626022	0.69575	0.728795	0.795721	0.528379	0.669444	0.750217	0.644714	0.680852	0.582655	0.912372	0.97322	0.682267	-0.206404	-1.153	-1.18281	0.771941	0.605086	0.867074
Abi3	+	0.195069	-1.58421	0.492964	-0.229951	-0.788188	0.451906	-1.54575	-1.12196	0.424154	-0.549212	-0.377872	-0.641791	0.0851031	-0.939052	-0.799265	-0.612169	-1.36457	-0.743142	0.718983	-0.830583	1.21535	1.1842	-0.529416	1.88095	-0.849678	1.75058	0.684247	-0.305439	0.684345	1.09492	-0.982759	0.666182	-0.896984	-0.588824	-1.4054	0.885495	1.02075	1.3332	1.37648	1.54133
Abitram	+	-0.239671	-0.420865	0.0680185	-0.0695598	-0.531456	-0.604273	-0.411009	-0.407148	-0.892369	-0.609724	-0.917313	-0.95361	-1.5946	-1.69695	-2.14188	-1.96463	-1.10554	-1.16858	0.878651	0.861525	1.11183	1.25815	1.17582	1.54721	1.67707	1.50912	0.620347	0.513609	0.643063	0.822572	0.908741	1.11489	1.12922	-0.150146	-0.245139	-0.0352509	0.085117	0.0359855	0.0642222	0.134554
Abl1	+	-0.016665	0.495874	1.08641	1.29807	0.787446	1.28	-1.39432	1.19319	-2.15711	0.464062	-1.22094	0.7915	-0.188995	-0.532521	-0.57561	-0.268847	2.0282	-1.16038	-0.859231	-0.292634	-0.495163	1.26507	-1.31475	-1.22441	-0.92229	-1.74736	-0.485967	-0.251275	0.100286	-0.464876	-0.31135	-0.556049	-0.0916148	0.966123	0.00722576	0.896392	0.250554	1.02476	1.04374	1.55345
Abl2	+	-0.156387	-2.43696	-0.445398	-1.98486	-1.25217	0.0258981	-0.50453	0.157517	-0.82777	-0.514976	-0.268828	0.0609165	0.39591	-1.12746	-1.38584	-0.440902	-1.63699	-1.13419	0.707303	0.44384	0.738776	0.627406	0.463708	1.04704	1.10617	1.27472	0.681622	0.768242	0.636257	0.935371	0.468554	0.766105	0.411885	-2.2585	0.464061	0.327372	0.703053	1.09112	1.31167	0.761257
Ablim1	+	-0.96228	-0.73386	-1.73224	-0.975538	-0.569322	-1.18404	-0.814832	-0.247922	-0.781506	-1.00698	-1.66786	-0.707521	0.39164	0.639146	0.421469	0.420889	0.57604	0.646054	-0.0556311	-0.134081	1.03652	0.9939	0.93986	1.6588	1.74008	1.73945	-2.45828	-0.621488	-0.242411	-0.652816	-0.931815	-0.0833629	-0.103022	1.05987	0.994396	1.057	1.07601	0.296029	0.363243	0.616397
Abr	+	-0.194528	-2.23728	0.185211	0.699922	0.104333	0.217275	0.185468	0.0506581	0.102407	-0.0592197	-0.0307393	0.345528	-1.84316	-1.12648	-0.718269	-1.65023	-2.50407	-1.68	0.742709	0.697597	0.850465	0.967617	0.90342	0.690395	0.840764	0.805405	0.434311	0.0323467	0.579787	0.792943	0.946867	0.845181	0.677796	-2.4368	0.49414	-0.577195	0.29612	0.523668	0.198758	0.846877
Abracl	+	-1.26574	-1.52189	-1.59742	-0.225758	0.146102	0.281729	0.0139512	0.497996	0.218279	0.264891	0.421809	0.417065	-1.80326	-1.1858	-1.17878	-1.18908	-1.842	-1.51752	1.30185	1.45509	0.707208	1.14657	0.999583	0.569994	0.557286	0.11806	0.919283	0.926515	0.814057	0.78122	0.678016	0.53243	0.567154	-0.773232	-0.270434	-1.53601	-1.21889	1.07926	1.00177	0.708648
Abraxas1	+	0.372745	-0.0867104	1.46435	1.23528	-0.261662	0.451665	1.12825	0.69407	-0.0882706	1.02139	0.131717	0.444434	-0.647983	-0.676348	-0.511402	-0.257571	-0.5815	0.170211	0.175575	-0.280304	-0.438059	0.582372	0.650509	0.878709	0.865574	0.247625	0.569054	-0.161281	0.429674	0.692336	1.11712	1.02031	0.96274	-2.09692	-2.62727	-2.34055	-2.33009	-0.697259	-0.638295	-0.584244
Abraxas2	+	-0.618887	-0.534666	-0.568372	-0.750375	-0.974106	-1.08895	-0.669756	-0.646374	-0.201221	-0.355217	-0.640779	-0.570192	-0.821577	-0.612953	-2.46824	-1.99832	-1.06117	-1.42197	0.600515	0.751854	0.748852	0.708759	0.749013	1.55699	1.48393	1.671	-0.27619	-0.313607	-0.234426	-0.246889	0.0611999	0.903529	0.826192	1.29222	1.2073	0.505033	1.13135	1.0642	1.07696	0.735341
Abt1	+	1.38245	1.0183	1.72625	1.28733	1.3972	1.62897	1.41094	1.24973	0.347941	0.578935	1.29593	1.11067	-1.07569	-0.359327	-2.10405	-1.33209	-1.03833	-0.834279	0.356427	-0.136156	-0.624174	-0.294034	-0.644525	0.287675	-0.109936	0.323783	-0.10311	-0.0919377	-0.386035	0.175963	-0.26134	0.118322	-0.122332	-0.209931	-1.21492	0.19198	-0.247633	-1.29071	-1.70726	-1.70098
Acaa1a	+	-0.193755	0.0480695	0.246883	0.284743	-0.22066	-0.20702	0.588703	0.70757	0.0312162	0.279496	0.0685078	0.0974114	1.43915	1.59559	2.30009	2.17028	1.59159	1.79604	-1.15328	-0.676249	-0.525462	-0.758702	-0.373245	-0.665293	-0.586704	-0.524627	-1.44706	-1.5888	-1.56287	-1.57602	-1.81296	0.123794	-0.00912277	-0.285277	-0.370658	0.569402	0.383903	0.0540676	0.169817	-0.00856976
Acaa2	+	1.00796	1.27332	1.56125	1.52113	1.21648	1.14234	1.35223	1.32858	1.20706	1.28767	1.22223	1.22432	-0.101132	-0.117398	-0.210256	-0.0630789	-0.610431	-0.565438	-0.340173	-0.180126	-0.449433	-0.490406	-0.297709	-0.738192	-0.633075	-0.545825	-0.922319	-0.906301	-0.830393	-0.855161	-0.935151	1.09983	1.13276	-1.16793	-0.948193	-0.502756	-0.546546	-1.44408	-1.45537	-1.72028
Acaca	+	0.138162	0.132931	0.309944	0.277452	0.104857	0.165544	0.00368861	-0.118825	-0.0440307	-0.105914	-0.274428	-0.242892	-1.9829	-1.83823	-2.31847	-2.51027	-1.51327	-1.93809	0.845955	0.797874	0.71715	0.75667	0.734634	0.642352	0.848567	0.99209	1.10172	0.988718	1.12249	1.05603	1.05463	0.632552	0.747486	-0.539308	-0.497739	-0.612801	-0.705902	0.230633	0.377009	0.463923
Acad11	+	0.642075	0.539339	0.431915	0.556114	0.355993	0.247594	0.364163	0.323105	0.443309	0.437851	0.404011	0.207378	1.12484	1.32252	1.31286	1.1832	1.14048	1.21955	-0.602939	-0.949183	-0.13639	-0.30416	-0.291445	0.691915	0.647897	0.4054	-2.24055	-2.28499	-2.21991	-1.41214	-1.40896	-0.280915	-0.414909	0.21419	0.217303	0.886689	0.807129	-1.11899	-1.4763	-0.985027
Acad8	+	1.53224	1.474	1.07074	0.920337	1.21672	1.0249	1.02764	0.817911	1.28829	1.10132	1.1445	1.10521	0.330885	-0.0830485	-0.230662	-0.720499	0.140687	-0.589534	0.00197538	0.0615868	0.180669	0.104097	-0.279263	0.186759	0.0317291	-0.00360994	-0.871069	-0.895319	-0.988257	-0.876472	-1.0187	0.35606	0.178058	-0.660112	-0.738562	-0.0941003	-0.337897	-2.18639	-2.17371	-2.54912
Acad9	+	0.976139	0.961867	1.08645	1.04276	1.16387	1.10909	1.11364	1.05631	0.877994	0.861864	0.967573	0.943689	-0.610748	-0.833466	-0.434811	-0.428696	-0.464006	-0.460547	0.487488	0.571735	0.507944	0.435055	0.423211	0.0860551	0.102784	0.0350684	0.0388269	0.101092	-0.000287442	0.0613109	0.0488471	0.334396	0.356973	-1.71064	-1.75619	-1.3948	-1.24564	-2.18576	-2.2169	-2.00952
Acadl	+	0.579892	0.308099	0.369229	0.396419	0.444745	0.651746	1.09183	1.09218	0.947169	0.735355	0.975433	1.04415	1.17762	1.12435	1.22909	1.37955	0.959049	0.836401	-0.450559	-0.25038	-0.665025	-0.631192	-0.54426	-0.753306	-0.316212	-0.506343	-1.62211	-1.31469	-2.05261	-1.63693	-1.89432	0.489372	0.277708	0.114633	-0.186026	0.4479	0.448412	-1.34266	-1.42234	-1.53137
Acadm	+	0.92503	0.817966	1.25152	1.16812	0.795219	0.78811	0.978031	0.703872	0.901205	0.780063	0.781374	0.65735	0.692026	0.963273	1.22733	0.932454	0.911097	0.799641	-0.675753	-0.729161	-0.918028	-0.85749	-1.00276	-0.987997	-0.975525	-1.0041	-2.27879	-1.87589	-1.82222	-1.30159	-1.33513	0.0168135	-0.0549812	0.148233	0.146906	0.792731	0.510127	-0.571838	-0.612366	-0.684878
Acads	+	1.00164	1.10959	0.689634	0.660137	1.13716	1.06813	1.35458	1.41288	1.31306	1.23775	1.53264	1.26548	0.662018	0.588104	0.870104	0.917923	-0.138341	0.0875145	0.0761681	0.0436225	-0.409808	-0.409649	-0.402627	-1.23074	-1.23069	-1.20085	-0.119358	-0.267974	-0.0975885	-0.952723	-1.05201	-0.240072	-0.106587	-1.1747	-1.26167	-0.9154	-0.841368	-1.77621	-1.48985	-1.70991
Acadsb	+	1.18512	1.1287	0.964862	0.94696	1.11321	1.08046	1.35244	1.42363	1.5026	1.47847	1.33859	1.48526	0.433615	0.440242	0.75993	0.940765	-0.123154	-0.161878	-0.0816577	-0.313474	-0.565935	-0.426791	-0.435851	-0.741551	-1.0017	-0.707965	-0.715415	-0.785234	-0.836115	-1.26415	-0.917997	-0.0773712	-0.203985	-0.756388	-1.5896	-0.612325	-0.840346	-1.66368	-1.39826	-1.35402
Acadvl	+	0.767663	0.673757	0.665479	0.466193	0.557997	0.664451	1.23204	1.27742	1.08816	1.1363	1.14786	1.19254	1.0677	1.17294	1.48769	1.45801	0.628517	0.661178	-0.230285	-0.393996	-0.799667	-0.637372	-0.693861	-1.10921	-1.27442	-1.05044	-1.31066	-1.11489	-1.2799	-1.20194	-1.27854	0.237171	0.101045	-0.432285	-0.220111	-0.105074	-0.0362511	-1.45068	-1.58741	-1.47712
Acap2	+	-0.371647	-0.483433	-0.0100661	-0.0693209	-0.74775	0.166794	0.305903	-0.0912448	0.0409547	-0.123088	-0.223915	-0.215766	-1.47865	-1.80002	-2.6383	-2.76352	-1.27678	-1.09757	1.41382	1.1891	0.979143	0.833571	1.26185	0.499219	1.04125	0.733429	0.762055	1.1012	0.89534	0.663554	0.57308	0.97003	0.969754	-0.670954	-0.451231	-0.128569	0.60892	-0.156693	-0.327705	0.117255
Acap3	+	-0.730489	-0.33608	0.998361	0.148153	-0.181562	3.67036	-0.241893	-0.40435	-2.06422	-0.819646	-0.752512	0.039061	-0.176075	-0.918904	-0.48169	-0.422166	-0.52924	-0.823933	0.741369	0.106507	0.435317	0.537819	0.506337	0.0853662	1.75827	-0.218348	0.566574	0.696324	0.412588	1.46682	0.423414	0.731013	0.485145	-0.782592	-0.744136	-0.619793	-1.14312	1.08589	-1.54581	-0.958123
Acat1	+	1.44501	1.38439	1.31317	1.28725	1.16868	1.1697	1.39523	1.30937	1.45173	1.49754	1.3806	1.37034	-0.408595	-0.301798	-0.563419	-0.525383	-0.538087	-0.528155	-0.111729	0.0107522	-0.164937	-0.186598	-0.225902	-0.454923	-0.447796	-0.428276	-0.781957	-0.784586	-0.483357	-0.920394	-0.835623	0.474894	0.423919	-0.707995	-0.858729	-0.992354	-0.683236	-1.74099	-1.63578	-1.77197
Acbd3	+	-0.482438	-0.576132	-0.121222	0.123642	-0.418358	-0.841112	0.839824	0.649649	-0.058343	0.170078	0.161354	0.245944	1.35567	1.23272	2.19815	2.10782	1.12904	1.20301	-0.631727	-0.697155	-0.369717	-0.503623	-0.41604	-0.295073	-0.315878	-0.423999	-1.90977	-2.15646	-2.36195	-1.27542	-1.22691	0.25091	0.252603	0.54556	0.0843708	0.879622	0.675932	0.0662769	0.552549	0.356593
Acbd5	+	0.934196	1.03398	-0.00104925	1.00092	0.776054	0.842374	0.0251989	-0.27721	0.0261735	-0.0940745	0.405326	0.423218	1.01874	1.34884	-0.004914	0.646382	0.335735	0.810388	0.426591	-0.277769	0.204579	0.0355049	0.152346	1.4796	1.56254	1.29964	-1.18807	-1.15454	-2.34046	-0.341885	-2.43214	-0.0730218	0.149227	-1.22313	-0.461091	-0.120814	-0.347936	-1.36038	-2.06761	-1.17145
Acbd6	+	0.303218	0.146102	0.756609	-0.26821	-0.96718	-0.880021	-0.858179	-0.201145	-1.33534	0.295208	-2.0898	-1.30414	-0.782098	0.193477	0.0398078	-1.26465	1.63236	-0.451007	-0.16388	0.92548	-1.17804	-1.83729	-0.73703	-0.110613	0.334978	0.283593	1.00419	0.982297	1.37392	-0.340594	-0.275499	-0.201758	-0.731439	1.91866	0.997843	-0.248254	0.681457	1.76262	1.31365	1.28069
Acin1	+	1.48183	1.33147	1.20997	1.22882	1.15777	0.933663	0.542056	0.437103	0.752792	0.658261	0.530125	0.480816	1.39849	1.39118	0.744426	0.503965	1.26089	1.26606	-0.757864	-0.638491	-0.592863	-0.674576	-0.874533	-0.18523	-0.460896	-0.0136212	-1.55145	-1.59464	-1.35667	-1.31569	-0.960043	0.050505	0.0261861	-0.667976	-0.475904	-0.477239	-0.318382	-1.4265	-1.66373	-1.38009
Acly	+	-1.06714	-1.08822	-0.955325	-1.03369	-0.976764	-0.922533	-0.718775	-0.592697	-0.481916	-0.574589	-0.598262	-0.670243	-1.4597	-1.3741	-1.77986	-1.65345	-0.920015	-0.996992	0.894623	0.942617	1.04023	1.08658	1.00531	0.934226	0.960232	0.822797	0.0500066	-0.122086	0.0172045	0.466771	0.521132	0.87827	1.03443	0.660482	0.464926	0.76158	0.771876	1.58451	1.5678	1.52074
Aco1	+	-0.546029	-0.484885	-0.64928	-0.75049	-0.665621	-0.627684	-0.385695	-0.401112	-0.426892	-0.610175	-0.519257	-0.423166	-1.3981	-1.51547	-1.61364	-1.64056	-1.42397	-1.375	1.08461	1.22091	1.14637	1.09475	1.01916	1.23961	1.18629	1.16876	0.966474	1.03183	0.946544	1.05197	1.04271	1.24892	1.17087	-0.194834	-0.163428	-1.25875	-0.987734	0.510387	0.479169	0.452431
Aco2	+	0.905068	0.801338	0.614675	0.655885	0.86342	0.80577	1.09304	1.10152	1.12378	1.07058	1.27799	1.28486	0.95717	1.1403	1.06738	1.10967	0.668239	0.835487	0.017472	-0.0404166	-0.562691	-0.60015	-0.591485	-1.34574	-1.41872	-1.34065	-0.352148	-0.388056	-0.374747	-1.20704	-1.16843	-0.158521	-0.104296	-0.957354	-0.757583	-0.363317	-0.212747	-1.88475	-1.72702	-1.83779
Acot1	+	0.437785	0.0171345	0.193547	0.197315	-1.08682	0.0241701	-0.0869098	0.31956	0.201786	0.293069	-0.459478	-0.505552	-0.607288	-0.455231	-0.50254	-2.06474	-0.783508	-1.9002	0.807448	0.872521	-1.58579	1.06501	1.14707	0.983449	1.58463	1.45773	0.855186	1.29599	1.30479	0.661313	1.26768	-0.282329	1.45784	-0.413655	-0.512704	-0.552148	-0.851264	-1.90127	-1.34389	-0.549694
Acot13	+	-0.219574	-0.15588	0.060591	-0.295595	0.92902	0.828704	1.68602	1.73355	0.996491	1.30249	1.46402	1.43726	-1.52172	-0.257728	-0.607393	0.334065	-0.497584	-0.0855369	0.965148	0.494625	0.440291	0.944764	0.935433	-0.938957	-0.497368	-0.35195	0.170014	0.227062	-0.0427176	-0.374559	-0.0109808	0.368732	0.633294	-1.43298	-2.34231	-1.28387	-0.753392	-1.00557	-1.37355	-1.90233
Acot2	+	0.507103	0.26287	-0.590332	0.615352	0.0738462	0.473313	1.30476	1.48723	1.05713	1.09324	0.928624	1.12283	0.904349	0.869703	0.95025	0.947438	0.748664	-1.45449	-0.231012	-0.126479	-1.23377	-1.08444	-1.99545	-0.594201	-1.526	-1.14423	0.38354	0.282318	0.323078	-1.26081	-0.907082	0.319434	-0.268188	1.23344	1.45762	-1.08945	-0.430869	-0.429371	-1.57717	-1.40278
Acot7	+	-0.768151	-0.823628	-1.03481	-0.565103	-0.529056	-0.441443	-0.275694	-0.519771	-0.449868	-0.170182	-0.423291	-0.281741	-1.64903	-1.05085	-1.39774	-1.43801	-1.56013	-1.34371	1.30916	1.38572	1.19262	1.26345	1.46829	1.08413	1.02081	1.0904	1.32461	0.982664	1.25649	1.27773	0.825242	1.16786	0.886531	-0.591631	-0.475435	-0.78415	-0.869545	0.06294	-0.12908	-0.0266301
Acot8	+	0.0931034	0.590535	1.63686	1.3165	0.450573	0.5822	0.802778	0.798563	0.313291	0.361327	0.131757	-0.0866002	0.353548	0.509579	1.47105	0.910744	0.273583	0.355185	-0.380808	-0.741706	0.12617	-0.12637	-0.154485	0.792483	1.13092	0.582699	-1.86563	-2.78249	0.0511861	-1.75298	-1.31498	-1.17503	0.0518547	-0.0832346	0.38649	0.635823	0.454601	-1.41141	-1.66868	-1.61899
Acot9	+	0.406724	0.405766	-0.0595686	0.318906	0.271949	0.301454	0.792946	0.814332	0.894555	0.937529	1.08002	1.01158	1.59269	1.76288	1.79039	1.65483	1.30082	1.29629	-0.450303	-0.275843	-0.960601	-0.519684	-0.852695	-0.975733	-0.761017	-0.914245	-1.55148	-1.45821	-0.97254	-1.48784	-1.38184	-0.879962	-0.421427	-0.091626	-0.168218	0.368697	0.136361	-1.16751	-0.846711	-0.941658
Acox1	+	-0.450339	-0.553332	-0.309559	-0.254725	-0.739772	-0.460554	-0.319436	-0.420089	-0.228998	-0.388458	-0.606935	-0.648354	1.34197	1.40741	1.10275	1.06565	1.53814	1.52294	-0.688216	-0.695252	-0.517836	-0.382326	-0.448431	0.232382	0.0777988	0.0621982	-1.63452	-1.64965	-1.8286	-1.28745	-1.43823	0.388081	0.305193	1.54613	1.49262	1.81221	1.78419	0.100921	0.204082	-0.0336251
Acox3	+	0.892091	0.57779	0.892726	0.92195	1.05208	0.651164	1.37655	1.26095	1.32707	0.715866	0.959364	0.80074	0.619608	0.0870143	0.760704	0.500218	-0.0814331	-0.407558	-0.258816	0.161007	0.435462	0.300833	0.174125	0.186175	0.567278	0.286874	-0.557023	-1.38309	-0.927906	-1.28266	-1.38024	0.327101	0.676972	-1.11133	-0.716656	-2.59898	-0.621197	-1.59907	-1.61634	-1.96944
Acp1	+	-0.0357993	-0.281971	-0.480277	-0.356856	0.0563274	0.237695	-0.259063	-0.355059	-0.47151	-0.492065	-0.0506245	-0.325745	-1.45239	-0.938476	-2.15073	-1.97008	0.490099	-1.95549	1.2798	1.48687	1.00511	0.944648	1.09627	0.560265	0.723862	0.44683	0.789431	0.827111	1.25293	0.882945	0.877223	0.52957	0.773461	-0.226559	0.149806	-2.43824	-1.50338	0.503992	0.391864	0.438202
Acp2	+	0.0783636	-0.669288	-1.40657	-0.553835	-0.140399	-0.594279	0.0711601	-0.0448692	-0.299478	0.167233	0.137991	0.0555361	0.172183	0.0671846	-0.158019	0.0987877	-0.326576	-0.406506	-0.293857	-0.32023	0.277794	-0.254237	0.177519	0.406508	1.13441	0.168284	-1.57107	-1.97233	-3.16714	0.787888	-1.62449	0.507321	0.559635	1.66222	1.41333	1.30706	2.03351	1.45992	0.385431	0.673896
Acp6	+	-0.895383	-0.187229	-0.159901	-0.508423	-0.00898954	-0.118032	-0.122309	-0.0930932	0.0198262	-0.172145	-0.00654984	-0.0707411	-0.518061	-1.01945	-0.823913	-1.0625	-1.45107	-1.1987	0.212592	0.609326	0.686571	0.819023	0.609357	0.752306	1.36744	0.711206	-0.253754	0.175972	-0.49049	-0.444561	-0.160777	0.858013	0.926289	-0.876579	-1.86029	-1.23631	-0.967956	3.04873	2.44919	1.46135
Acsf2	+	0.253351	0.602644	0.667718	0.780811	0.332257	0.386937	1.26528	1.46804	1.30397	1.5264	1.12857	1.10663	0.984386	1.07911	1.31497	1.15335	0.30375	0.315669	-0.474533	-0.406841	-0.487321	-0.436436	-0.585485	-0.629878	-0.60958	-0.569942	-1.95633	-2.05435	-1.18552	-1.65372	-1.48594	-0.204024	-0.274473	-0.343642	-0.297911	0.767795	0.296145	-1.29392	-0.841258	-1.24668
Acsf3	+	0.796393	1.05054	0.524233	1.1616	0.986065	1.05444	1.07215	0.95147	0.959746	1.07355	0.87559	0.994806	0.245449	-0.229951	0.268129	0.206714	-1.1989	-0.464774	0.448503	0.597842	0.539682	0.151401	0.622408	-0.19695	-0.115884	0.0602706	-0.221502	-0.586076	-0.557468	-0.183723	-0.593515	0.772132	0.836731	-2.36786	-1.97834	-0.868916	-1.32525	-1.32648	-2.29755	-1.73671
Acsl1	+	-0.456684	-0.486497	0.585246	0.0044462	-0.331896	-0.428773	0.231237	-0.0439319	-1.11488	-1.53544	-1.02431	-0.899853	-0.577091	-0.516324	-0.373295	0.273787	-1.2022	-1.87138	-0.361117	0.0571168	0.89675	2.29821	-0.512724	1.21634	0.500151	0.832121	-1.45978	0.428736	-0.278268	2.19287	1.06443	0.523911	0.941714	0.589283	0.16395	0.0952599	0.215763	-0.589579	2.34866	-1.39598
Acsl3	+	1.02748	1.4158	0.639583	0.569732	1.0767	0.871442	0.902488	0.905859	1.02307	1.13725	0.849748	1.09688	0.937884	0.925108	0.382052	0.354371	0.148197	0.199673	-1.09008	-1.08425	-1.24125	-2.07618	-1.13971	-0.899169	-0.815369	-1.20139	-1.16067	-0.569329	-0.691224	-0.737729	-0.722546	0.510735	0.612529	0.589646	0.717731	0.431413	0.741399	-1.91148	-1.17995	-1.54646
Acsl4	+	-0.0792265	0.21959	0.225678	0.460443	-0.108274	0.101619	0.153988	0.309785	0.320233	0.244967	-0.00726154	0.0650731	1.14365	1.01799	1.22657	1.14835	0.684977	0.608269	-0.929102	-0.872671	-0.905083	-1.0094	-0.753862	-0.547652	-0.612272	-0.341578	-1.55811	-1.25555	-1.44833	-1.29244	-1.58508	-1.11549	-0.98483	1.67044	1.95976	2.17481	1.89293	-0.312765	0.0485158	0.0413373
Acsl5	+	0.638744	0.697962	0.16744	0.560959	0.540254	0.661606	0.707531	0.987257	0.702851	0.8677	0.47278	0.673363	1.42661	1.12602	1.22703	1.49792	0.268347	-0.309197	-0.315317	-0.280654	0.0418585	-0.0641849	0.166375	-0.421969	0.160338	0.0387004	-0.943092	-0.739338	-0.461572	-0.984116	-1.17811	0.482812	0.302604	-0.323218	-1.24413	-0.705164	0.922231	-1.85414	-2.8578	-2.65729
Acsl6	+	0.531486	0.570465	0.169502	0.000241551	0.212251	0.386973	-0.00702628	-0.207168	-0.4177	-0.305575	-0.215111	-0.176828	-0.455799	-1.58059	-1.70982	-2.33121	-1.28879	-0.852564	1.02509	0.336648	1.13135	0.938248	0.768389	0.995774	1.04687	1.03756	0.762275	1.00073	0.846716	1.61006	1.45254	-0.180254	-0.467732	-0.228743	1.19527	-2.02712	-1.74887	-0.592732	-0.963408	-0.261406
Acss2	+	-1.63648	-1.25394	-1.47198	-1.4524	-1.9421	-1.31425	-0.839187	-0.798281	-1.49449	-0.772678	-1.22284	-0.957556	1.20426	1.17268	1.15827	1.15599	-0.984433	-0.371818	-0.00786772	0.379503	0.294849	0.483937	0.626213	0.709147	0.491553	0.71032	0.156506	0.472981	0.0348921	0.207422	0.0673804	1.0595	1.06702	1.00256	1.34001	-0.366468	0.209874	0.0348337	1.62573	1.22133
Acta1	+	0.402252	0.349289	0.152927	0.0427244	-0.614479	-1.45871	0.287125	0.327215	0.144044	0.180909	0.253862	-0.0404613	0.882581	0.861894	1.57933	1.59335	0.946333	0.805623	-0.65943	-1.67569	-0.77894	-0.0565175	-1.84282	0.14416	-0.981823	-1.0412	-0.824613	-0.821439	-0.99415	-1.31902	-1.47331	-1.01771	-1.35719	1.2836	1.42748	0.978502	1.22863	1.0629	0.99718	1.02559
Actbl2	+	-0.924304	-1.01155	-0.619573	-0.391754	-1.24429	-1.04094	-0.961087	-0.573325	0.0917965	-0.359545	-0.272949	-0.251484	1.75082	1.60632	0.885441	1.07385	0.3341	-0.258995	-0.806143	-0.930487	-0.456152	0.0942774	-0.897521	-0.0223339	-0.0569548	-0.150076	0.170093	0.145539	0.230337	-1.42442	-1.03222	-1.06028	-1.1943	1.97635	2.15784	1.7157	1.79462	0.999634	0.134554	0.779407
Actg2	+	-0.0394592	-0.474265	-0.741645	-0.978526	-0.0213962	0.0509088	0.13979	-0.0289031	0.760783	0.74518	0.659659	0.86408	2.4697	1.80421	1.04676	0.904192	1.55458	1.41776	0.382293	0.647191	-0.403393	-0.422349	-0.227497	-0.578128	-0.638298	-0.397967	-1.6581	-1.9352	-1.54168	-1.35062	-1.25611	-0.329238	-0.30756	0.513572	0.759292	0.90671	0.596642	-1.14536	-1.01667	-0.730944
Actl6a	+	1.18418	1.20946	0.609483	0.567175	1.48165	1.37849	0.822338	0.819073	0.976534	0.980943	1.13058	0.912596	0.0913926	0.405963	0.0677562	-0.345385	0.677159	0.621106	0.245173	0.547219	-0.196672	-0.352932	-0.514962	-0.869936	-1.10244	-0.450813	0.283634	0.272055	0.280343	-0.299001	-0.180372	-0.538873	-0.329986	0.119534	-0.546074	-2.16708	-1.12501	-2.3419	-2.24092	-2.08148
Actn1	+	-1.57507	-1.60059	-1.54513	-1.59853	-1.54462	-1.58815	-0.442523	-0.454852	-0.759939	-0.801388	-0.618643	-0.552831	0.730887	0.717351	1.02574	0.968849	0.67781	0.726748	0.326989	0.351958	0.120922	0.10875	0.158535	-0.337696	-0.370269	-0.376265	-0.159539	-0.142505	-0.157325	-0.382586	-0.43373	-0.119243	-0.141452	0.798041	0.83741	0.85286	0.851215	2.13588	2.18344	2.1295
Actn4	+	-1.77198	-1.7749	-1.67309	-1.76405	-1.8754	-1.72391	-0.813073	-0.825709	-1.17714	-1.08659	-0.858318	-0.898443	0.475508	0.396736	0.529548	0.503541	0.62375	0.597923	0.925743	0.94194	0.721779	0.680164	0.669374	0.417656	0.427634	0.313176	0.55042	0.446832	0.433213	0.0489142	0.0979351	-0.0997549	-0.104538	0.462565	0.357082	0.435862	0.464239	1.6417	1.68968	1.594
Actr10	+	-0.768779	-0.867729	-1.29898	-1.59547	-1.20879	-1.27887	-0.794978	-0.790585	-0.648246	-1.02619	-0.694854	-0.813653	-1.41944	-1.07994	-1.00978	-0.881579	-0.84902	-0.499991	0.841103	0.693363	1.04559	0.601621	1.19474	0.968002	0.530421	0.838433	0.10216	0.0798723	0.161182	0.737927	0.66291	0.871988	0.92043	0.290214	-0.08641	0.410636	1.05088	1.78452	1.8765	1.95081
Actr1a	+	-0.812614	-1.38592	-0.748273	-0.107358	-1.34326	-1.37384	-0.216879	-0.556011	-0.739903	-0.485916	-1.10396	-1.21195	-0.0964438	-0.031798	0.156876	-0.385344	0.286163	0.0807738	0.525637	0.22983	0.346062	0.751034	0.787385	0.390452	0.450238	1.29992	-1.35715	-1.42604	-1.93949	-0.390597	-0.180198	0.795176	0.904108	1.0299	0.75289	0.12688	0.831728	2.03449	1.76324	2.35015
Actr1b	+	-0.537908	-0.473094	-0.154631	0.272044	0.10097	-0.170262	-0.235479	-0.353099	-0.330964	-0.585564	-0.617726	-0.460928	-1.15395	-1.64793	-0.828991	-0.676504	-0.32441	-0.407519	1.4358	1.09783	1.31093	0.818949	1.51496	0.472819	0.761755	1.29897	-0.384085	-0.141816	-0.332658	0.958556	1.08452	0.933328	1.17553	-0.972113	-2.28969	-2.35893	-1.07071	1.09006	0.842113	1.33982
Actr2	+	-1.23501	-1.15029	-0.895528	-1.08976	-1.50937	-1.63961	-0.759792	-0.8613	-1.04591	-0.875534	-1.19828	-1.26135	-0.712106	-0.975879	-0.973853	-0.643423	-0.779849	-0.817279	0.806117	0.866303	1.08182	1.17158	1.08409	1.16211	1.1862	0.913898	0.489417	0.417541	0.740745	0.427484	0.685479	0.268552	0.429078	0.858927	0.828264	0.0881692	0.455176	1.56026	1.55571	1.34722
Actr3	+	-1.47227	-1.16621	-1.62475	-1.77967	-1.3045	-1.48249	-0.723358	-0.762489	-0.687482	-0.762416	-0.607487	-0.665484	-0.400221	-0.364452	-0.571013	-0.358546	-0.869835	-0.840085	1.54108	1.54976	1.2124	1.2279	1.27375	0.931965	0.911286	0.714726	-0.0148593	0.16199	0.0504929	0.095547	0.179984	0.460801	0.507175	0.428908	-0.0726382	0.321091	0.0275547	1.77964	1.68656	1.46766
Actr5	+	-0.0428723	0.987026	0.525489	0.316791	0.419793	0.00300338	-0.628347	-0.18747	-0.173177	0.710965	0.281286	0.309123	-0.352652	0.567622	-0.473941	-1.75411	-0.541008	0.894007	0.407424	0.486464	-0.771212	-1.44489	1.55428	-0.17963	0.329836	-1.00563	1.72776	1.53091	1.2466	0.608153	1.09973	0.476415	0.158676	-2.64935	-1.21426	-0.252493	-2.14647	0.650953	-1.58822	0.113417
Actr8	+	0.559344	1.02226	0.785239	0.564868	0.711105	0.955354	0.358922	0.00267082	-0.454153	0.101447	-0.375384	0.21933	0.118675	-1.32846	-2.73711	-0.832607	-0.629627	-0.129393	0.557329	0.696069	0.394139	-0.176234	0.444502	0.752183	0.749848	0.584817	1.11203	0.469723	0.799164	0.428157	0.292223	0.271002	1.07369	-0.915463	-0.25431	-3.81492	-0.0267437	-0.506394	-1.52338	-0.319907
Acvr1	+	-1.07595	-0.83503	-0.446125	-0.791061	-0.943617	-0.716492	-0.189767	-0.479279	-0.391932	-0.52927	-0.696547	-0.394091	1.36118	1.46834	1.5942	1.63912	1.06813	1.15716	-0.234381	-0.30602	-0.136427	-0.109839	-0.3836	-0.510094	-0.115649	-0.0430329	-2.27677	-1.43029	-2.35611	-0.28234	-0.12938	-0.02645	-0.0280491	1.18737	1.13464	1.09382	1.00956	1.08719	1.31901	0.737865
Acy1	+	0.0987459	-0.0208293	-0.0991926	-0.13313	-0.0747247	-0.0236146	-0.0735779	-0.0260289	0.0836215	0.0752025	-0.0122764	-0.0433706	-1.97908	-1.56604	-1.72746	-2.19193	-1.6218	-1.53597	1.12414	1.13435	1.09466	1.16776	1.06981	1.13551	1.13752	1.10527	0.813609	0.973894	0.990067	1.02418	1.02263	0.766153	0.748491	-0.793054	-0.985306	-0.865269	-1.16741	-0.151526	-0.390224	-0.0838015
Acyp1	+	-0.855019	-0.602246	-1.00383	-0.92564	-1.10217	-0.961809	-0.682821	-0.471185	-0.67246	-0.434363	-0.449131	-0.554984	-1.80669	-1.3459	-1.24764	-1.25793	-1.49519	-1.50964	1.13862	1.0752	1.09149	1.17882	1.23613	1.23247	1.3025	1.31434	0.855175	0.630542	0.583845	0.760048	0.896954	1.20124	1.14743	0.328467	0.100934	-0.334339	-0.576046	0.658149	0.702776	0.853905
Acyp2	+	-0.691562	-0.641314	-1.28342	-1.10627	-0.481731	-0.597155	-0.844487	-0.750279	-0.375001	-0.391193	-0.473666	-0.357445	-1.96456	-0.930182	-1.23697	-1.23547	0.108023	-1.28318	1.19948	1.14119	1.07344	1.19283	1.25628	0.988057	0.970275	0.833361	0.7553	0.873147	0.677565	1.12663	1.10975	0.962079	0.957631	-1.16375	-1.66981	-0.714024	-0.0192965	0.903993	0.968105	1.11365
Ada	+	-2.21179	-1.85577	-1.13366	-0.998079	-1.58553	-1.73655	-0.82646	-0.76462	-0.668308	-0.31935	-0.783014	-0.726915	-0.285965	0.0364171	-0.830517	-0.582394	-0.531616	-0.525061	1.05987	1.01171	0.876468	0.727217	0.846993	0.64521	0.817394	0.601374	0.483413	0.683521	0.509547	0.551723	0.490177	1.16975	1.04534	0.647732	0.715721	-1.02755	0.00513878	1.53784	1.5135	1.41707
Adam10	+	0.623269	0.400712	0.747245	0.386725	0.434157	0.726213	0.488447	0.361413	0.850773	0.890297	0.349765	0.685572	1.56919	1.04967	0.655298	1.09298	0.550907	0.547692	-1.48599	-0.857135	-0.867576	-0.941999	-1.13527	-0.202161	0.236283	0.581834	-1.3581	-1.52181	-2.11956	-1.62303	-1.10423	-0.172433	0.202275	0.964548	0.186625	1.47657	1.2299	-1.00763	-1.54537	-1.34607
Adam15	+	1.14524	1.26807	1.38859	1.09532	0.975148	0.921887	1.46151	1.47191	1.25672	1.26637	1.20953	1.08553	0.0495382	0.251375	0.363958	0.377668	-0.00633599	-0.228175	-0.419719	-0.535197	-0.378156	-0.199641	-0.494739	-0.144331	-0.0395143	-0.286468	-0.477874	0.153235	-0.123538	-0.376659	-0.49318	-0.465335	-0.319723	-1.51844	-1.86395	-1.05757	-0.443905	-1.76784	-2.18314	-1.91818
Adam17	+	1.36537	1.49215	1.20707	1.01342	1.3653	1.12328	1.30106	1.17254	1.14021	1.15881	1.27214	1.23166	0.542415	0.435055	0.132117	0.0107604	0.0709891	-0.0274952	-0.555313	-0.384682	-0.534345	-0.612522	-0.392768	-0.67338	-0.433497	-0.292416	-1.05107	-1.47095	-1.07089	-1.04869	-0.752066	-0.0590827	-0.136475	-0.157952	-0.191064	-0.172262	-0.102464	-1.83927	-1.87115	-2.20455
Adam9	+	0.464476	0.407696	0.475445	0.347353	0.399376	0.32975	0.59291	0.580935	0.446434	0.50773	0.374919	0.512635	1.47334	1.29763	1.47615	1.47835	1.41512	1.30439	-0.815822	-1.17853	-1.02314	-1.10597	-0.927125	-0.905348	-0.910848	-0.973839	-1.62588	-1.5285	-1.64171	-1.39103	-1.60106	-1.05034	-0.84864	0.577936	1.01648	0.79442	0.808858	0.291873	0.0414992	0.112059
Adamtsl4	+	0.606076	0.475095	0.514819	0.47585	0.250086	0.466313	1.09438	1.0956	0.889458	0.828137	0.874476	0.782659	-0.114098	0.0358873	0.288824	0.178521	-0.652357	-0.363869	-0.697779	0.373048	-1.85089	-1.38622	-0.407351	-0.553217	-0.603161	-1.09481	2.05778	2.10075	2.02522	-0.451399	-1.31987	-1.78932	-0.812467	-0.411033	-0.665141	0.301302	0.241399	-0.67297	-1.97475	-0.134975
Adap1	+	0.0621287	0.265813	0.278503	0.218204	-0.520287	-0.146134	0.0778975	0.320873	-0.307769	-0.367973	-0.314502	-0.499834	-1.07787	-0.647012	-1.03814	-1.78565	-1.40103	-1.60811	0.862812	0.868967	1.07968	1.18151	1.05722	1.2381	1.33314	1.24565	1.04434	1.24155	1.19257	1.27903	0.981323	0.778171	0.797106	-1.451	-0.231087	-1.29266	-1.14265	-0.94326	-1.37519	-1.25442
Adar	+	0.747227	0.650065	0.820036	0.939575	0.600101	0.870845	1.05787	1.2959	0.647799	0.960345	0.670953	0.926531	0.82151	1.1008	0.994321	1.71828	0.321163	0.334836	-1.44606	-1.33797	-1.83693	-1.05884	-1.28318	-2.04027	-2.02549	-0.8038	-0.552297	-0.453169	0.231688	-0.0469556	-0.306052	-0.125849	0.180347	0.690372	0.263256	-1.3678	0.119118	-0.912787	-0.599455	-0.766024
Adarb1	+	0.414394	0.822594	0.625539	0.505699	0.346532	0.623126	0.836957	0.948838	1.21923	1.12044	0.847994	0.958873	-1.11589	-2.21359	-1.2705	-0.20941	-2.0375	-2.53055	0.37899	-0.122903	0.226131	0.27487	0.902833	0.428232	0.733583	0.25949	0.59863	0.687135	0.499104	0.6282	0.170936	0.615469	0.479768	-0.803136	-1.21022	-0.357054	-1.67202	-1.09603	-1.55536	0.0405674
Adat1	+	-0.467189	0.346065	0.425837	0.305569	-0.202338	-1.04998	-0.209454	-0.00911293	-0.834103	-0.791477	-0.328439	0.125683	-2.26311	-1.41713	-1.73613	-1.56747	-0.823196	-0.225562	0.649989	0.473609	1.08585	0.842101	1.06968	0.945906	0.871737	0.702239	0.618177	0.905129	1.02393	0.769555	0.949972	1.29684	1.17239	-0.655116	-0.885847	0.337831	-1.13335	1.42632	0.473868	-2.21928
Adat2	+	0.465129	0.457262	0.168776	0.275363	0.435491	0.303323	0.312025	0.305114	0.330028	0.23855	0.277626	0.40515	-1.70627	-1.11384	-1.74447	-1.4883	-1.85193	-1.30782	1.13114	1.11097	0.916021	0.874759	0.875801	0.686748	0.799606	0.591859	0.959348	0.837113	1.04076	0.82459	0.871441	0.764721	0.809108	-1.64132	-1.65199	-1.68599	-1.55727	-0.327337	-0.601078	-0.390204
Adat3	+	-0.881971	-1.23472	-1.00109	-0.916055	-0.65142	-0.403204	-0.300912	-0.557944	-1.22784	-1.56064	-0.952371	1.82381	2.06631	-1.09554	-1.12743	0.188511	-0.54745	-1.18144	1.14052	1.06934	1.06554	-0.535321	0.526694	1.10203	0.821415	0.440393	1.217	1.36898	1.13082	1.30171	0.820862	0.58811	0.902933	-0.680159	-0.337885	0.198571	-0.431733	-0.810572	-1.15593	-0.181904
Adck1	+	0.465633	0.307892	0.931918	1.11684	0.171588	0.431065	0.103025	0.741742	0.761757	-0.0494534	0.104236	0.07706	-0.726395	0.0987316	1.84681	-0.172833	0.360854	1.43872	0.325262	1.15461	0.593369	-0.120911	0.515801	1.18704	0.691694	0.160976	-2.33866	-0.938176	-0.983543	-0.58552	-1.26815	0.966068	1.05724	-0.430732	-0.780287	-1.1846	-0.440609	-2.49053	-1.94775	-1.15179
Adck5	+	1.84863	1.50042	0.695905	0.56521	0.505062	1.2575	1.85806	1.00096	1.27161	1.18924	0.918344	1.34477	0.534981	0.241023	0.185235	0.554734	-0.490895	0.0816067	-0.84872	-1.09825	-0.00469556	-1.73658	-1.1807	0.161238	-0.925427	-0.879089	-0.768547	-0.110972	-1.61311	-0.574892	-0.0547081	0.00648784	1.12316	-0.658615	-1.30065	-0.668878	-0.774089	-0.784472	-1.52474	-0.846133
Adcy3	+	1.1362	1.3996	0.304901	0.00393341	1.05309	0.874439	0.98265	0.763734	1.12523	0.775725	0.716468	0.97852	0.291787	-0.342571	0.217259	-0.797325	-2.55423	-0.904855	0.109737	-0.0313776	0.323422	0.182932	-0.107916	-0.8112	-0.168759	-1.08844	0.736117	0.453541	0.0285513	0.0356285	0.0388826	0.932207	0.488171	-3.0657	-1.42139	-1.24834	-1.5874	0.617574	-0.852687	0.411889
Adcy6	+	0.498372	-1.78431	0.512654	0.497685	0.506652	-1.33792	0.341297	0.32048	-1.77963	0.527444	0.432129	0.398033	-1.32777	0.244158	-0.0431686	-1.74794	-1.67861	0.392609	0.883395	0.891681	0.88365	0.937552	0.881196	0.93891	0.81358	0.913091	0.64852	0.627209	-1.12578	-1.1416	-1.86469	0.95954	0.928868	0.52644	0.600268	0.502473	-1.27022	-1.1073	0.87432	-1.27327
Add1	+	0.275923	0.604326	0.587639	0.777214	0.0576006	0.247591	0.439442	0.81992	0.543825	0.0430312	0.132656	0.389833	-1.60148	-2.45491	-2.4513	-2.81585	-0.666897	0.324515	0.0367678	0.405442	0.146426	0.326452	0.0508397	-0.383288	-0.297967	0.00423722	0.741428	0.627149	0.906191	0.580787	0.57772	1.89157	2.07663	-0.812071	-0.715957	-0.372072	0.33619	-0.0955703	-0.546739	-0.737249
Add3	+	0.882329	0.724996	0.487101	0.545539	0.312748	0.593377	0.747742	0.706014	1.06616	1.10033	1.23422	0.969971	-0.214997	-0.191818	-1.6631	-1.07479	-0.117523	-0.624717	0.537497	0.407912	-0.040251	1.15778	0.305726	0.178711	0.0781621	0.318764	-0.321225	-0.248258	-0.561164	0.444485	0.493333	0.814359	1.08725	-1.84767	-3.43026	-0.277348	-0.228287	-1.49567	-1.36465	-1.49278
Adgra2	+	-0.502323	-0.325447	-0.733769	-0.334295	-0.331686	-0.550572	0.471934	-0.0363729	-0.0760587	0.310092	-0.113716	-0.0720366	1.62481	1.55504	1.32371	0.916421	1.39878	1.30383	-1.43876	-0.528943	-1.54172	-1.47368	-0.415651	-0.431905	-0.610531	-0.689662	-0.0860301	-0.704183	-1.01521	-0.533583	-2.85239	-0.181371	-0.194241	1.17341	1.12795	1.32149	1.50696	0.34834	0.837718	0.553651
Adgre5	+	1.44695	1.61375	1.32563	1.24618	1.29395	1.29864	1.0414	1.00288	1.23731	1.28331	1.20728	1.13499	-1.37721	-1.28393	-1.03028	-1.12855	-1.69387	-2.06193	0.0274388	0.122436	0.00743929	-0.0124091	0.0123088	0.196809	0.295221	0.372821	-0.370682	-0.371536	-0.254627	-0.39179	-0.259522	0.144597	0.153099	-0.663772	-0.727305	-0.949383	-0.733751	-1.10756	-1.02177	-1.02457
Adgrf5	+	0.122817	0.0765413	-2.49375	0.96149	0.240215	0.197632	0.696963	0.700466	-0.18633	-0.190732	0.116327	0.0102188	-0.0861066	-0.00454953	1.23924	1.29371	0.728318	0.737652	0.261413	0.242532	0.355933	0.448884	0.51218	0.235068	0.13953	-0.00311087	-2.48079	-1.80304	-1.88306	0.960048	1.04172	0.399882	0.401712	-2.57051	-1.59841	-0.315685	-0.234258	0.562231	0.587341	0.580262
Adgrg1	+	0.78371	0.797596	0.683168	0.902908	0.499618	0.639065	0.683314	0.638864	0.499605	0.626586	0.364656	0.508581	-1.37573	-0.971934	-2.17993	-0.662534	-1.30032	-1.76052	0.496529	0.430767	0.811976	0.84989	0.742853	1.05817	1.1423	1.11607	0.367232	0.23735	0.40588	0.383277	0.583498	0.674382	0.519444	-1.46543	-0.45601	-1.94545	-1.33388	-1.41563	-1.6269	-0.953016
Adgrl2	+	0.476181	0.341611	0.829497	0.941986	-0.00084812	0.766975	0.539723	0.0478964	0.395692	0.880588	0.589373	0.207718	0.856842	0.851877	0.599661	1.04683	0.843945	0.981386	-0.954412	-1.40451	-0.420971	0.0890007	-0.324266	-0.143287	0.232445	-1.16714	-1.75902	-2.32653	-1.71626	0.249869	-1.73814	-2.1196	-0.208372	0.658235	0.583582	1.0817	1.24793	-1.69576	0.212987	0.42559
Adh5	+	-0.31193	-0.4572	-0.600791	-0.46227	-0.357526	-0.394453	-0.107222	-0.111645	-0.166266	-0.12455	0.149089	0.060719	-1.52713	-1.48773	-1.64187	-1.78266	-1.18359	-1.16678	1.4696	1.40874	0.946221	0.937881	1.00735	0.516756	0.550142	0.547397	1.4478	1.29675	1.38136	1.17628	1.28846	1.03033	0.885085	-0.693485	-1.18731	-1.28382	-1.58696	0.239151	0.0361171	0.25998
Adh7	+	-1.25101	-0.826865	-0.658805	-0.762485	-1.65213	-1.20839	-0.386843	-0.307671	-0.423591	-0.501086	-0.609858	-0.447326	-0.797644	-1.08456	-1.88047	-1.4552	-1.07633	-1.43091	1.00725	0.963295	1.33193	1.22174	1.06039	1.52966	1.41491	1.42834	0.925378	0.918262	0.972899	0.919519	0.854826	0.923082	0.800909	0.103411	-0.0454452	-0.748351	-0.0892218	0.600289	0.459121	0.20898
Adi1	+	-0.639217	-0.148351	-0.247856	-0.641323	-0.729136	-0.798694	-0.389204	-0.442235	-0.452429	-0.508635	-0.50878	-0.344298	-2.31684	-1.55329	-1.91843	-1.49329	-0.0317221	0.153615	1.17658	1.17699	1.17271	1.23956	1.23496	1.17019	0.914874	0.855806	1.01756	0.894123	0.713853	1.13872	1.19781	1.19683	0.890121	-0.536387	-0.588494	-1.13735	-1.54915	0.172839	0.374738	0.283224
Adk	+	-0.3742	-0.439957	-0.372672	-0.230526	-0.481773	-0.508494	-0.467688	-0.476923	-0.311061	-0.50251	-0.508752	-0.60864	-1.74596	-1.47075	-2.41781	-2.5867	-1.43714	-1.34117	0.680445	0.627555	0.727042	0.669842	0.595214	0.881676	0.88007	0.891151	0.325736	0.352471	0.386748	0.41502	0.458583	0.778508	0.866923	0.808755	0.902608	0.226158	0.354287	1.44018	1.63181	1.38194
Adnp	+	0.370195	0.575707	0.838634	0.991022	-0.236048	-0.374846	-0.149593	0.0381548	-0.686871	-0.522763	-0.606481	-1.05637	2.39105	1.7644	1.58902	1.66176	1.91116	1.94662	-1.71374	-1.05936	-1.36148	-0.970532	-0.938459	-0.924752	-0.704551	-0.564517	-0.713047	-0.712963	-0.668874	-0.331697	-0.14396	-0.00132652	0.397238	0.306915	-0.503466	0.67402	0.547851	-0.0641838	-0.697238	-0.296612
Adnp2	+	0.704959	0.836819	1.47571	0.829466	0.571076	0.816996	0.533441	0.981992	0.50357	-0.29029	0.106782	0.397667	-1.11356	-0.227037	0.467851	-0.154659	0.281274	0.248135	0.457178	0.601593	-2.02905	0.658908	-0.705727	0.584054	-0.104157	0.429098	-0.421717	-0.433799	-0.255969	-0.216464	-0.305384	-0.564969	0.673179	-2.47954	0.649896	-2.86444	1.3648	-2.38878	-0.354768	0.735863
Ado	+	-0.659013	-0.220404	-0.85261	-1.08284	-1.02292	-0.823049	-0.277953	-0.432983	-0.212391	-0.600964	-0.31152	-0.102981	-1.50895	-1.20644	-1.46995	-1.19652	-1.62297	-1.77386	1.19378	1.22335	0.95018	0.860379	0.876646	0.571713	0.432324	0.81735	1.01194	1.24249	1.10951	1.26095	0.966301	0.936074	0.85209	-0.269246	-0.264948	-0.908055	-1.07345	1.36408	1.35177	0.873071
Adpgk	+	1.12903	1.40042	0.827001	0.742797	1.05258	1.0677	1.40649	1.33486	1.31856	1.54731	1.41102	1.31851	0.811573	0.89801	0.56259	0.657464	0.0859769	0.175919	-0.227805	-0.197404	-0.768348	-0.803391	-0.84354	-1.36927	-1.53804	-1.48545	-0.893393	-0.875435	-0.612869	-0.902587	-0.967694	-0.103796	-0.029786	-0.457092	-0.976398	-0.62477	-0.397765	-1.25386	-1.14331	-1.27582
Adprh	+	-1.25872	-0.947653	-1.16795	-1.66625	-1.09997	-1.20386	-0.722129	-0.567542	-0.0648873	-0.258471	-0.284705	-0.331696	-1.19624	-0.593467	-1.54683	-1.19536	-1.00343	-1.71473	1.04343	1.01053	1.06319	1.16334	0.908404	1.17698	1.29213	1.16603	-0.0623424	-0.0146983	-0.0138307	0.415245	0.537242	1.08922	1.23782	0.960785	0.907003	-0.228192	-0.341542	1.07438	1.20688	1.2319
Adprs	+	-0.69826	-0.434087	-0.414237	-0.198733	-0.393842	-0.613059	-0.525301	-0.485674	-0.390671	-0.375565	-0.471922	-0.380444	-1.30049	-2.24119	-1.62389	-1.52746	-1.45642	-1.38557	1.22681	1.13749	1.17933	1.18164	1.23051	1.18063	1.09396	1.19354	0.784722	0.755366	0.783112	1.12966	1.03151	1.12483	1.03951	-0.478236	-0.657686	-0.464483	-1.15657	0.614786	0.450456	0.53591
Adsl	+	-0.349478	-0.310946	-0.378967	-0.492016	-0.461954	-0.424005	-0.262413	-0.327561	-0.396037	-0.390409	-0.494774	-0.436299	-1.63135	-1.55716	-1.97378	-1.85739	-1.46302	-1.49376	1.0998	1.13369	0.982649	0.962356	0.996046	0.944147	0.893186	0.920565	1.30217	1.25298	1.27899	1.15454	1.17581	0.997457	1.01035	-0.391066	-0.274246	-0.89263	-1.08937	0.403251	0.383403	0.45724
Adss2	+	-0.757962	-0.557555	-0.592901	-0.721615	-0.579416	-0.735892	-0.61494	-0.596062	-0.59786	-0.65544	-0.51791	-0.688311	-1.43897	-1.45593	-1.90603	-1.8079	-1.34908	-1.21974	1.18036	1.21126	1.0899	1.11549	0.965235	0.912686	0.828905	0.997117	1.17795	1.23857	1.16701	1.1135	1.20784	0.623835	0.798334	-0.201193	0.0276718	-0.628314	-0.581933	0.77096	0.837837	0.940514
Aebp1	+	-0.419608	-0.552211	-0.517282	-0.264859	-0.645439	-0.665433	-0.0177069	0.173493	-0.655546	-0.193128	-0.36161	0.0108308	1.38854	1.41648	1.49474	1.45987	1.5751	1.48014	-0.502164	-0.806235	-0.723299	-0.916639	-0.325602	-0.026227	-0.0244168	-1.2871	-1.69545	-1.27332	-0.709116	-1.53133	-1.86302	-0.306262	-0.309078	1.25087	1.04431	1.48019	1.33686	0.86736	0.780412	0.832882
Aebp2	+	-0.191461	-0.575039	-1.12186	0.887464	-0.983451	-0.652609	-0.341771	-0.261648	-1.12915	-0.198533	-0.691586	-0.156074	0.62417	1.59102	-1.47633	-1.28612	1.40334	0.847225	-1.07283	-0.377283	-2.79596	-0.695271	-0.408393	-0.0983158	-0.513992	-0.211237	0.842644	0.972517	0.791098	-0.271851	-0.03876	0.381586	0.277919	0.900173	-0.205698	0.455774	0.365942	1.56797	1.78182	2.06456
Aen	+	1.42107	1.56309	1.34174	1.35934	1.45356	1.51141	1.19598	1.1758	1.2492	1.05194	1.34882	1.36704	-0.632233	-0.659047	-1.27124	-1.53037	-1.22017	-0.586026	-0.107189	0.215966	-0.751596	-0.61955	-0.0475379	0.00110757	-0.750258	-0.312161	0.27345	0.368719	0.328866	-0.0337819	-0.576768	-0.25972	-0.426224	-1.06489	-0.916726	-1.24977	-0.95248	-0.819073	-1.08518	-1.35511
Afap1	+	-0.143698	-0.195631	-0.246911	-0.341263	-0.392902	-0.258158	0.169788	0.161235	0.456989	0.0858586	0.318602	0.186164	1.44983	1.48064	1.37578	1.4515	1.269	1.52692	-0.466443	-0.737494	-0.812848	-1.00775	-0.892654	-1.19954	-1.40055	-0.818109	-1.80743	-1.43016	-1.26576	-1.34982	-1.46609	-0.4424	-0.346169	0.908538	1.2992	1.11145	1.19404	0.873913	0.792382	0.909956
Afdn	+	-0.174084	-0.185381	-0.174059	-0.170929	-0.21383	-0.285862	-0.54185	-0.430923	-0.481862	-0.38556	-0.597068	-0.46952	-1.23315	-1.21779	-1.90285	-1.87506	-0.974763	-1.27336	1.20022	1.09991	1.27096	1.10854	1.24665	1.56777	1.55393	1.6676	0.782271	0.838382	0.90411	1.04578	1.0621	0.949808	0.925932	-0.849197	-1.23903	-0.891678	-0.577503	-0.278047	-0.422541	-0.378075
Aff4	+	1.34851	1.89161	1.87264	1.58485	0.677098	1.1863	-0.582097	-0.837756	-1.00413	0.0899487	-0.0939476	-0.167255	1.60941	1.09384	0.620615	0.572587	0.696091	0.865716	-0.741171	-1.86071	-1.12311	-1.3904	-0.399709	0.0378016	0.359415	1.11272	0.00703253	0.0175765	0.518938	-0.0655934	0.139529	-1.02876	-0.233978	-0.237459	-0.698654	-1.56071	-0.744688	-1.01954	-1.35496	-1.1576
Afg1l	+	0.653036	0.722111	1.17143	0.980802	0.889681	0.827823	0.993674	0.883349	0.731568	0.965118	0.644167	0.785465	-0.396269	-0.00891239	0.143183	0.420252	-0.751937	-0.779724	0.26463	0.311484	0.267222	0.532353	0.389863	0.570546	0.608095	0.747943	-0.304522	-0.656697	-0.281752	-0.12091	-0.263172	0.798196	0.539249	-1.33484	-2.94509	-0.692559	-1.50038	-2.10271	-2.32229	-1.37947
Afg3l1	+	0.85414	0.852432	1.38956	1.62293	1.06846	1.08384	0.922859	0.974381	0.226639	0.669086	0.963637	0.731784	-0.0864898	0.283551	0.673825	0.304945	0.517743	0.223831	0.556979	-0.00841736	-0.132669	0.0778264	-0.451958	-0.416982	-0.87437	-0.448042	-0.18254	-0.109165	-0.00926105	0.263563	-0.285621	0.530684	0.415583	-1.94721	-1.15211	-0.946365	-2.0545	-1.25751	-2.60014	-2.24493
Afg3l2	+	1.27227	1.1681	1.21654	1.2209	1.32415	1.27986	1.34074	1.42025	1.37072	1.32016	1.32438	1.27616	-0.164219	-0.108962	0.288433	0.119242	-0.195622	-0.344545	-0.264256	0.0211803	-0.166465	-0.313791	-0.163303	-0.488214	-0.425155	-0.40281	-0.528937	-0.966963	-0.760148	-0.5843	-0.687148	0.115098	0.173085	-1.14073	-1.32487	-1.30006	-0.452923	-2.15341	-1.71702	-1.5974
Aftph	+	-0.315196	-0.473558	-0.437283	-0.719049	-0.535769	-0.232185	-0.339872	-0.575901	-1.2512	-0.423817	-0.255889	-0.354875	-1.44907	-1.23094	-1.82007	-0.76474	-0.467438	-1.61695	1.63101	1.17369	1.51068	1.21939	1.29039	0.902245	1.15827	0.927393	0.700777	0.865839	1.08271	1.48612	1.40421	0.891914	0.764187	-1.08487	-1.12204	-1.23635	-0.569758	0.323114	0.118066	-0.173174
Aga	+	0.437776	0.645547	0.385016	0.42848	0.457446	0.417952	1.44768	1.26701	1.08401	1.22134	0.988765	1.19754	1.29784	1.27962	1.46341	1.46476	1.00259	0.87912	-0.359712	-0.500199	-0.751095	-0.68431	-0.5143	-1.22833	-1.42848	-1.52736	-1.09477	-1.34559	-1.07994	-1.61741	-1.27993	-0.702801	-0.531414	-0.4613	-0.269761	0.248716	0.352436	-0.817884	-1.01526	-0.757199
Agap1	+	-0.598801	-1.44546	-2.61394	0.855737	-0.994146	-0.977672	-0.567036	-0.768245	-0.4969	-0.393082	-0.12713	-1.11815	-0.700194	-1.36991	-0.338062	-0.93469	1.27462	0.3983	0.137714	0.564493	1.24986	0.71423	1.16568	0.858203	0.342153	1.03911	-1.30195	0.717266	-0.710732	0.692585	1.01963	0.828725	0.668803	-0.172716	-0.13261	1.21773	-1.50812	1.60645	1.08123	0.837019
Agap3	+	0.445301	0.316411	0.872541	0.403226	0.658179	0.371109	0.750167	0.411642	1.03026	0.959119	0.498093	0.640419	-1.23216	-1.9441	-2.07463	-1.59532	-1.59814	-1.68177	0.563905	0.6025	0.706482	0.584092	0.375664	0.64881	0.63411	0.647762	0.745776	0.853943	0.709748	0.790986	0.727004	0.829895	0.616752	-0.793035	-2.27334	-0.976888	-0.957897	-0.793024	-0.785398	-0.688206
Agfg1	+	-0.499999	-0.787033	-1.03591	-1.13904	-1.17582	-1.30145	-0.561606	-0.489058	-0.371407	-0.484529	-0.631068	-0.805731	-1.33985	-1.33973	-1.66467	-1.73143	-0.771803	-0.835145	0.745148	1.06847	0.944802	1.13552	1.10295	1.48006	1.67526	1.58742	0.721293	0.8712	0.75675	0.852907	1.13337	1.2419	1.1744	-0.0534554	-0.258914	-0.174974	-0.239463	0.311575	0.510864	0.378196
Agfg2	+	0.622299	0.181342	-0.281147	0.533771	-0.036616	0.484645	0.860482	0.646657	0.438012	0.502357	0.427615	0.621745	-2.51738	-1.78503	-1.24545	-1.64365	-1.25477	-0.735812	0.60374	0.362676	0.125942	-0.345619	0.0859743	-0.7772	-1.18307	-1.39241	0.0857645	2.43502	0.697323	1.09053	0.631296	0.991463	0.670678	-0.243808	-0.338443	-1.30733	-0.998946	0.901799	0.938953	1.1466
Agk	+	1.42194	1.70453	1.57437	1.60387	1.21154	1.33494	1.26518	1.27179	0.966771	0.819998	1.05175	1.08748	-0.645304	-0.496456	0.00536805	0.184755	-0.517341	-1.02981	-0.352432	-0.321087	-0.277289	-0.353124	0.00716983	-0.375009	-0.333122	-0.335825	-0.840256	-0.537802	-0.707893	-0.142883	-0.212393	0.425634	0.680118	-0.895829	-0.59343	-2.15126	-0.929576	-1.52597	-1.64023	-1.40285
Agl	+	-0.0918917	-0.164171	-0.833446	-0.452127	-0.419671	-1.93737	-0.904821	-0.323343	-1.16781	-0.636741	-1.46647	-0.286957	-1.33292	-1.07166	-0.76958	-0.56341	-1.3812	-1.21985	0.0485153	0.0797683	0.398227	0.247811	0.51051	0.844902	0.764996	0.9056	-0.314326	-0.0639875	-0.0917829	-0.245791	-0.333769	0.370434	0.647057	1.10683	1.67331	1.68221	1.99589	1.52976	1.54307	1.72419
Ago1	+	0.320062	0.038453	-1.32435	0.550186	-0.530681	-2.35287	0.0665438	0.0966534	-2.01442	-0.916125	-1.47594	0.555944	-1.42835	-1.05957	-0.171444	-1.39733	-0.49021	-0.582093	0.973006	1.09138	1.02753	1.33518	1.29555	1.47825	-1.39871	-0.720618	0.510627	0.385296	1.03299	0.178237	0.198675	1.03168	1.48794	0.327	-0.0707708	0.317303	0.427909	-0.200058	0.296113	1.11105
Ago2	+	-1.67193	-2.16917	-1.02137	-1.30439	-1.34988	-1.3331	-0.927185	-0.821124	-1.1961	-0.786469	-0.825467	-0.940958	0.862923	0.882357	0.379815	0.285714	1.20417	1.43647	0.441683	0.308982	0.121315	0.0787133	0.0892752	0.541791	0.211452	-0.19781	-0.304547	0.0677164	-0.368571	-0.644653	-0.426115	0.00799816	-0.0106778	1.02506	1.90487	1.55629	0.960179	1.33429	1.16513	1.43333
Agpat1	+	0.0923631	0.893704	-1.26698	0.161633	-1.1291	0.678026	1.52822	1.45052	1.62837	1.64584	1.22168	1.25483	1.11183	0.973913	1.14169	1.31513	-0.0356742	-0.194447	0.478308	0.438613	-2.02326	-0.00088806	-0.138985	-1.12359	-0.355207	-1.77303	-1.05785	-0.957236	-1.06289	-0.619384	-0.318232	-0.450097	-1.18421	-0.321305	-0.728746	0.269324	0.508977	-0.774822	-0.629667	-0.647364
Agpat2	+	0.844688	0.976236	1.05004	0.948691	0.629552	0.755424	0.751961	-0.504332	0.437608	0.765709	0.598897	0.162588	0.579929	0.696525	-1.65819	0.17624	-0.860654	0.104169	0.137049	-0.048103	-0.729778	0.0965011	0.64435	0.539344	0.452314	0.666627	-0.147091	-2.81894	0.940059	0.522555	-2.22941	0.480706	0.487544	-0.357049	-0.473451	-2.15934	1.20849	-0.997931	-1.84055	-0.828982
Agpat3	+	0.585046	0.596135	0.691537	0.792846	0.301238	0.0785026	0.539654	0.602629	0.593131	0.601753	0.453851	0.638334	1.08056	0.94103	1.52073	1.3009	1.22101	1.05409	-1.32447	-1.43057	-1.14532	-0.796168	-0.963843	-0.510584	-0.52033	-0.451431	-0.882496	-1.80169	-2.56607	-1.6484	-1.47961	-0.0790408	-0.0744963	0.801468	0.479945	0.695645	1.28986	-0.440408	-0.487668	-0.257292
Agpat4	+	0.853741	0.796259	0.648608	0.520261	0.877156	0.710205	0.929697	0.899457	1.23987	0.994344	0.783258	0.986956	-0.663586	-0.534479	-0.821626	-0.637169	-0.455863	-1.02247	0.580267	0.287256	0.747228	0.697267	0.51986	0.95079	0.972329	0.818644	-0.886632	-1.17576	-1.31408	-0.567567	-0.526192	0.894412	0.744602	-0.959942	-0.147375	-0.33311	-0.675285	-2.20137	-2.49503	-2.03493
Agpat5	+	1.05794	1.09424	1.46685	1.38336	1.22447	1.35541	1.28329	1.15535	0.730066	0.731516	0.93956	1.02743	-1.13358	-0.277359	0.427194	0.146812	0.0177121	-0.408178	-0.0284021	-0.487718	-0.0268309	-0.0346318	0.117682	-0.482527	-0.413934	-0.373425	-0.109998	-0.0529732	0.0533339	0.119298	-0.160271	0.520957	0.814804	-1.61088	-1.82829	-1.25777	-1.57191	-1.7241	-1.93914	-1.74535
Agps	+	0.289153	0.554307	0.309351	0.521748	0.163425	0.298646	0.136483	0.182829	0.0833135	0.0313943	0.257338	0.213237	1.43189	1.49294	1.58708	1.56715	1.09029	1.3628	-0.800696	-0.890708	-0.96807	-0.841573	-0.665465	-0.202108	-0.135127	-0.266295	-1.78556	-1.7543	-1.61225	-1.73954	-1.57188	-0.306225	-0.3447	1.09294	0.91386	1.34846	1.30403	-0.849817	-0.620329	-0.878014
Agrn	+	1.06647	1.54727	1.52044	1.46255	1.2514	1.30561	1.06411	1.20932	1.46277	1.30631	0.859287	1.19795	-0.0823139	0.461044	-0.233137	0.00153209	-0.653179	-0.172834	-1.80479	-0.946166	-1.43942	-1.21912	-0.168288	0.716485	-0.919398	-1.06607	-0.835748	-0.7086	-0.337745	-1.09521	-0.804085	0.121312	0.329483	-0.956776	-0.294056	-1.65269	-0.282568	-0.964961	-0.357551	0.111366
Ahctf1	+	1.49318	1.55068	1.81378	1.85935	1.69128	1.62654	0.977312	1.04885	0.758012	0.888251	0.955839	0.849965	-0.0265263	0.102093	-0.021891	-0.0816694	-0.11898	0.216896	-0.563056	-0.480691	-0.557124	-0.456593	-0.553053	-0.909663	-0.537894	-0.545001	-0.291471	-0.032875	-0.202212	-0.187781	-0.218396	-0.348966	-0.179719	-1.11338	-1.37221	-0.690279	-1.22894	-1.73491	-1.70596	-1.67279
Ahcy	+	-0.410093	-0.164828	-0.375739	-0.431145	-0.275983	-0.474497	-0.398891	-0.327388	-0.394229	-0.332059	-0.360104	-0.26221	-1.75207	-1.8987	-2.12727	-2.06337	-1.26318	-1.36554	1.27223	1.16756	0.865794	1.0379	0.990687	0.773548	0.705705	0.761854	1.34809	1.25344	1.20448	1.14843	1.27296	0.81422	0.757392	-0.304745	-0.357052	-0.58924	-0.882546	0.394258	0.541629	0.500717
Ahcyl1	+	-0.144259	-0.378042	0.205442	-0.091615	-0.111437	-0.161834	-0.530557	-0.396624	-0.426221	-0.324667	-0.64162	-0.608145	-1.97656	-1.98873	-2.25359	-2.02323	-0.873733	-1.31152	0.725874	0.905708	0.842691	0.63242	0.692296	0.941015	0.973349	0.915454	-0.061613	-0.135561	-0.0592519	0.415021	0.662136	0.339735	0.367568	0.822331	0.424782	-0.408306	-0.425337	1.86346	1.97429	1.62887
Ahcyl2	+	0.131157	0.253219	-0.128447	0.225294	0.206065	0.32771	0.000630464	-0.145109	0.173112	0.0903341	0.0458836	0.429763	-2.06821	-1.48787	-1.35867	-1.79	-2.55274	-2.18302	0.930671	1.00751	0.752835	0.736332	1.05122	0.879913	1.04951	0.902016	1.06946	1.01771	0.896713	0.883474	0.897441	0.264604	0.641992	-0.796673	-0.587614	-1.33385	-0.960306	0.0584711	0.256994	0.212472
Ahdc1	+	0.313248	0.524622	-0.0776624	0.166897	-0.149998	-0.21569	0.475836	0.970022	-0.0355412	0.450995	0.291565	0.574994	2.06789	1.35934	1.04002	1.25941	0.658884	1.64276	-0.0396434	-0.492807	-1.78539	0.0698916	0.0427426	-0.83821	-0.402928	-0.588755	-0.99472	-0.811237	-1.40477	-1.22865	-0.898633	0.659371	0.821234	-0.781848	-0.696153	0.975929	1.83228	-1.25679	-1.81642	-1.68209
Ahnak	+	-0.889134	-0.827837	-0.718826	-0.793332	-0.675183	-0.669842	-0.471263	-0.455834	-0.86707	-0.827872	-0.691905	-0.725579	1.60869	1.54589	1.95054	1.94842	2.20889	2.18239	0.0244699	0.065728	-0.484744	-0.544962	-0.490676	-0.91462	-0.818925	-0.782005	0.213768	0.16006	0.147432	-0.885928	-0.882793	-1.15857	-1.09119	0.49148	0.620862	1.01519	0.880009	0.539824	0.577157	0.487288
Ahnak2	+	-1.00355	-0.913696	-1.18775	-1.18622	-0.96325	-0.899865	-0.27809	-0.28431	-0.129299	-0.261381	-0.187774	-0.1325	1.56017	1.61506	1.71687	1.70118	1.4232	1.38508	0.00564504	0.0154166	-0.0497358	-0.148077	-0.0699704	-0.0134152	0.00659322	-0.0252611	-1.49193	-1.35232	-1.3387	-1.69417	-1.58955	-0.330761	-0.284974	0.860545	0.941451	1.0761	1.2038	0.71447	0.838547	0.75242
Ahsa1	+	-0.307254	-0.396473	-0.419869	-0.394915	-0.29126	-0.288731	-0.293341	-0.396944	-0.175893	-0.286501	-0.2731	-0.203391	-1.59887	-1.66682	-2.16369	-2.23471	-1.48463	-1.52965	1.2156	1.30982	1.09185	1.09896	1.1487	0.793222	0.959932	0.786455	1.20339	1.09276	1.05917	1.07256	1.1067	0.899777	0.947596	-0.319436	-0.237305	-0.758673	-0.661615	0.203405	0.230336	0.16282
Ahsa2	+	-0.0978461	0.33021	0.375595	0.437674	0.433057	0.552555	0.411425	0.429585	0.308575	0.351484	0.262864	0.299139	-1.81567	-1.59316	-2.28373	-2.31087	-1.42704	-1.15364	0.756517	0.860108	0.671879	0.609607	0.810249	0.309617	0.389561	0.340655	1.07976	1.02473	0.98336	1.04425	0.999245	0.810448	0.828227	-0.817069	-0.62896	-2.36739	-1.0334	0.0787748	-0.233437	-0.0269517
Ahsg	+	-1.08939	-1.29429	-0.924816	-1.14576	-0.902992	-0.874772	-1.26075	-1.26232	-1.0735	-1.38928	-1.10258	-1.14318	-0.0637559	0.689574	-0.110904	-0.0659331	1.2334	0.621587	0.310576	0.424769	0.127734	-0.116969	0.149062	-0.251639	-0.0991799	-0.152436	0.903961	0.786054	0.934754	0.17361	0.10277	0.322764	0.184732	1.84809	1.76781	2.47714	2.29088	-0.331714	-0.279182	-0.413929
Aida	+	-1.80149	-1.04844	0.534316	-0.791471	-1.22438	-1.77982	-1.304	-0.349308	-0.667096	0.225254	-0.65423	-0.681779	-1.51415	-1.3103	-1.11187	-0.382722	0.0317785	-0.150075	0.350245	0.403844	0.482708	0.912213	0.927653	0.98102	1.14826	1.24411	0.290991	0.0276159	0.260868	0.534751	0.0793147	1.16838	1.14076	-1.16629	-0.310301	-0.612689	1.5856	1.68018	1.24403	1.6065
Aif1l	+	-0.373766	0.0554547	-0.0448719	-0.253801	0.477401	0.489955	0.481584	0.535968	0.127768	0.431974	0.76402	0.617127	1.0139	0.581725	1.03732	0.860472	1.4364	1.53775	0.84337	0.988108	-0.105535	-0.210293	-0.378306	-2.56707	-0.884599	-1.06993	0.369835	0.182778	0.246364	-0.159559	-0.448334	-3.27592	-1.25082	-1.77891	-0.339098	-1.11601	-0.558517	0.603153	0.680767	0.452152
Aifm1	+	0.740337	0.812482	0.899309	1.1149	1.08259	1.05527	1.36833	1.34062	1.00528	1.11169	1.2379	1.04206	0.760228	0.669463	1.25014	1.28269	0.53331	0.202175	-0.108601	-0.10117	-0.730362	-0.472658	-0.578424	-1.19165	-1.49408	-1.20482	-0.38555	-0.0559779	-0.0943367	-0.971546	-1.03481	-0.293494	-0.341147	-0.91293	-1.61261	-0.838462	-0.35123	-1.49141	-1.72293	-1.52057
Aifm2	+	0.689944	0.546064	0.267966	0.404888	0.540476	0.530507	0.835633	0.72861	0.818635	0.901094	0.825558	0.797798	0.407072	0.548066	0.349959	0.355906	0.490199	0.614081	-0.0509473	-0.0879329	0.104954	0.0382113	0.342397	0.598279	-0.170227	-0.595458	0.0338806	-0.0758866	0.0163884	-0.436737	-0.266005	0.190245	0.274593	0.0392301	-1.45156	0.150254	-0.0407883	-2.96646	-3.25457	-3.04431
Aig1	+	0.288785	-0.459829	-1.86268	-0.921646	-0.959388	0.483974	-0.388532	0.124014	-2.459	-0.742042	-0.679395	0.881917	0.902149	1.03792	1.44367	1.41049	0.662378	1.5424	-0.341196	-0.967761	-0.380627	0.548299	-0.16584	0.340833	0.421703	-1.2433	0.4754	-0.746685	-1.38149	-0.837191	-0.78544	-0.196842	0.579888	0.895085	0.749823	1.56067	0.868924	1.65207	-1.17502	-0.176482
Aim2	+	-0.320862	0.495894	1.52613	0.151562	-0.730271	0.839856	-1.04285	0.00931608	0.15077	-0.184795	-0.191555	0.490476	-0.220338	-0.377382	1.05302	-0.602034	0.765102	0.185619	-1.43858	-0.45038	0.06158	0.362643	0.393788	1.16767	1.25916	1.384	0.298747	-1.62697	-1.5189	-2.58709	-2.81618	-0.394241	-0.0323544	0.241919	1.18654	1.11022	0.567369	1.02653	-0.0177426	-0.175382
Aimp1	+	-0.64194	-0.457832	-0.339731	-0.206283	-0.748792	-0.653432	-0.234842	-0.257087	-0.509225	-0.346475	-0.648467	-0.926323	-1.65804	-1.85455	-1.73153	-1.78467	-1.82854	-1.50076	1.08941	1.10976	1.24724	1.22634	1.25073	1.32571	1.111	1.33205	0.65433	0.733629	0.745548	1.13892	1.15426	0.651655	0.764351	-0.0685214	-0.136999	-0.143585	-0.031431	0.477179	0.322321	0.374631
Aimp2	+	0.0354234	0.165704	-0.0431572	0.098979	0.180331	0.252598	0.513798	0.56767	0.0849257	0.524498	0.539843	0.712865	-1.54124	-1.04939	-1.99963	-1.76357	-1.56832	-1.1115	1.24143	1.47957	0.568818	0.76611	1.03212	0.0802481	0.0276752	0.267361	1.56832	1.55035	1.4918	0.781578	0.753471	0.411337	0.385941	-1.27856	-1.77872	-0.978388	-1.36323	-0.729372	-0.357397	-0.520281
Aip	+	-0.418934	0.0980337	-0.690952	-0.196197	-0.346385	-0.179101	-0.756478	-0.293781	-0.454347	-0.412837	-0.512262	-0.101017	-1.68528	-1.55954	-2.23785	-1.75086	-1.84388	-1.15709	0.947767	1.03275	0.630147	0.63536	0.746937	0.872115	0.382377	0.722516	1.246	1.40444	1.57437	1.09047	1.01607	0.361502	0.399347	-0.190974	-0.0846791	-1.17174	-0.49802	1.05836	1.12841	1.19523
Ajuba	+	-0.469144	0.673826	-0.050621	0.589946	-1.42803	0.565412	-0.0145204	-0.228496	0.312869	-0.533992	-2.90028	-1.72923	-1.37666	0.671362	-0.472631	-0.311403	-1.12563	-1.30209	-2.12464	0.614268	0.692201	-1.22351	0.877922	0.953978	0.469534	1.08313	0.629263	0.471793	0.783229	1.12384	0.883104	0.683257	0.893157	0.166181	-0.819349	-0.179209	0.211691	0.907848	1.06566	0.965966
Ak1	+	-0.955094	-1.20649	-0.617552	-0.717612	-0.947706	-1.04965	0.0185909	-0.101455	-0.46187	-0.837407	-0.0695942	-0.411473	-0.758457	-0.589927	-0.396627	-0.540178	-0.955084	-0.777048	1.25222	1.52959	1.67653	1.6592	1.39067	1.60319	1.29665	1.38801	-0.698213	-0.70011	-0.762919	-0.450522	-0.494112	1.36208	1.19018	-0.762598	-0.903011	-0.976019	-0.69604	1.21945	1.25334	0.997074
Ak2	+	0.789799	0.132384	0.999424	0.818232	0.614856	0.555947	1.70281	1.62079	0.737574	1.19142	1.54383	1.62274	0.0302102	-0.0250353	1.07267	1.15129	-0.260527	-0.181994	0.0701829	-0.424043	-0.529565	-0.290259	-0.599428	-0.921145	-1.24723	-1.81969	0.262435	0.192724	0.390381	-0.114849	-0.320672	-1.04425	-1.00928	0.28757	-0.0262586	-2.21356	-2.0173	-0.544605	-0.946684	-1.25089
Ak3	+	1.02253	1.01106	0.702117	0.785856	0.887266	0.887848	1.15703	1.1155	1.04203	1.28702	1.19882	1.2335	-0.390158	-0.157086	-0.309735	-0.422845	-0.94279	-1.03328	0.439822	0.518058	0.320983	0.29006	0.318185	0.249189	0.338158	0.0941551	-0.137499	0.0300464	0.152023	-0.09047	-0.114715	0.336502	0.349298	-1.31859	-1.75198	-1.39477	-1.20484	-2.19292	-2.28841	-2.01696
Ak4	+	1.00003	0.960306	0.91624	0.887269	1.00817	0.977377	0.891489	0.908303	0.801289	0.817358	0.989719	0.973287	-0.872006	-1.35913	-0.92531	-1.18517	-1.29589	-1.14155	0.512008	0.499622	0.280616	0.310451	0.254483	0.0804305	0.0989979	0.140738	0.795495	0.777887	0.799263	0.594557	0.622655	0.295162	0.319743	-1.68889	-1.50961	-1.14555	-2.21586	-1.35415	-1.32746	-1.49236
Ak5	+	0.0989794	0.213678	-0.156514	0.0907727	0.0415919	-0.0340339	0.266769	0.294697	0.312475	0.172312	-0.107197	-0.00783112	-2.33587	-1.94171	-1.95622	-1.86206	-2.17724	-1.76092	0.785459	0.743603	0.521729	0.451335	0.710743	0.254684	0.520175	0.41111	0.795212	0.843908	0.867108	0.946914	0.931273	1.01276	0.974143	-0.196778	0.632107	-1.01018	-1.59854	0.792401	0.566272	0.892876
Akap1	+	0.627851	1.11755	1.37931	1.5544	-0.188699	0.00711574	1.28904	0.96231	0.211102	1.015	0.470024	1.26408	-0.0583834	0.709029	0.332378	0.363008	0.787807	0.185745	-2.84638	-2.67949	-1.28839	-1.94452	-1.28311	-0.395786	3.50357e-06	-0.161931	-0.0490815	0.0403033	0.379518	0.258418	0.173377	-1.05543	-1.31145	-0.290556	-0.336356	0.205085	-0.209737	0.235706	0.206644	0.324486
Akap10	+	-1.09107	-0.647229	-1.73305	-1.28497	-1.84849	-0.883139	0.107682	-0.297119	-0.146951	-0.845511	-0.621244	-1.13462	0.203479	-0.764975	-2.97275	-0.193762	-1.01055	0.474761	1.13565	0.883975	0.964399	1.54258	1.32726	0.976482	0.866634	0.992658	0.583338	0.694082	-0.543868	0.465207	-0.125291	0.812928	1.13732	0.470641	0.336343	0.60183	-0.231766	0.151662	0.738939	0.908498
Akap12	+	-1.20197	-1.22777	-1.24021	-1.2099	-1.248	-1.23341	-0.684968	-0.681581	-0.463532	-0.362072	-0.559531	-0.541631	1.09425	1.06784	1.05706	1.09141	0.603062	0.650759	-0.27062	-0.170517	-0.283647	-0.181544	-0.175208	-0.0233425	-0.113595	-0.0702601	-0.698727	-0.713666	-0.570635	-0.622315	-0.594695	-0.640907	-0.642016	1.48216	1.41241	0.700427	0.717452	2.18374	2.19435	2.17135
Akap13	+	-0.439787	-1.09541	-0.47051	-0.49831	-0.508652	-1.09236	-1.4693	-0.595377	-0.555563	-0.936925	-1.30182	-0.922798	-0.720538	-0.848391	-1.26704	-0.757973	-0.110299	-2.25964	1.10138	1.09449	1.21823	0.833973	1.15237	1.74298	2.02019	1.69656	0.592452	0.794395	0.981482	0.734785	0.229572	0.092822	0.778428	-0.000578741	-0.637756	-0.336765	-0.190376	0.598511	0.713879	0.639685
Akap2	+	-1.83688	-1.44991	-1.37605	-1.37697	-1.79434	-1.69405	-0.688432	-0.514943	-0.919475	-0.821054	-0.920464	-0.63895	1.1212	1.12481	1.1096	1.10374	1.02314	1.10264	0.492123	0.50079	0.264884	0.18678	0.250272	3.61944e-05	0.114688	0.0190341	-0.414539	-0.392646	-0.432027	-0.473186	-0.376907	-0.394089	-0.252307	0.928955	0.75353	0.837564	0.856303	1.67346	1.677	1.62666
Akap8	+	0.95278	1.26611	1.29213	1.15332	0.895528	0.850992	1.21805	0.897688	0.820403	0.53365	0.353418	0.286746	-0.0359234	0.450263	0.12262	0.29747	0.11823	0.275941	0.344349	0.398978	0.163821	0.200768	0.288833	-0.245073	-0.517696	-0.748445	0.336264	0.339391	0.303899	0.205926	0.444225	0.123788	-0.699607	-2.12696	-2.80706	-1.1493	-0.830256	-2.14941	-1.56561	-2.06024
Akap8l	+	-0.150505	0.441338	0.619058	2.39386	0.541405	0.711234	0.573944	-0.0368715	0.0353764	0.908454	0.55741	1.15714	1.01617	0.889465	0.920831	1.10961	0.349326	0.12329	1.05831	0.115416	-0.220003	0.0483802	0.267246	-0.453316	-0.343979	-0.262058	-0.28341	0.0808604	-0.628298	-0.533977	-0.0351947	-0.444046	0.565355	-2.19152	-1.72869	-1.27301	-1.05462	-0.278321	-3.01284	-1.55283
Akap9	+	-2.37738	-1.08907	-1.03321	-0.883006	-1.71911	-1.46109	-0.84545	-0.666646	-1.59807	-1.3388	-1.09033	-0.905635	0.153622	0.500117	-0.0359444	0.389872	0.0340459	-0.711542	1.22009	0.565365	1.12084	1.3341	1.09878	1.08085	0.444025	0.755609	0.186991	-0.0388702	0.640944	0.419825	-0.256912	1.71601	1.90166	-0.155819	0.272077	0.288814	0.915504	0.190244	0.447401	0.530098
Akr1a1	+	-0.730159	-0.757239	-0.935471	-0.890247	-0.826769	-1.02086	-0.405579	-0.441172	-0.571986	-0.563787	-0.450587	-0.532117	-1.16769	-1.38013	-1.55431	-1.412	-1.33371	-1.36101	1.23509	1.2342	1.13364	1.12265	1.17287	1.00939	0.988648	0.954216	1.01664	1.07152	0.911122	0.833677	0.78434	0.89629	0.857524	-0.282458	-0.228666	-0.775657	-1.08514	1.20096	1.17025	1.11372
Akr1b1	+	-0.416446	-0.422859	-0.541299	-0.5798	-0.381375	-0.465671	-0.23324	-0.281415	-0.150104	-0.213079	-0.162727	-0.181203	-1.51487	-1.45537	-1.91702	-1.89052	-1.66963	-1.60231	1.23584	1.24216	1.19403	1.19111	1.23497	1.13354	1.03789	1.12279	1.06708	0.947895	0.986231	1.03608	1.13208	0.880257	0.889704	-0.513899	-0.51564	-0.941287	-0.913081	0.208706	0.242153	0.180326
Akr1b10	+	0.736953	-0.0985214	1.18664	0.462936	0.384388	0.309502	0.516046	0.979823	1.1539	1.18051	1.18011	0.673537	0.128114	0.209016	0.273966	-0.333659	0.709719	-0.00763945	-0.12754	0.545153	1.09186	0.902495	0.882774	0.919512	1.15555	0.826001	-1.72328	-2.12046	-1.29326	-1.26794	-1.43409	0.0505486	0.375159	-1.59983	-1.73725	-1.27391	-0.814596	-0.943832	-0.674723	-1.38369
Akr1b8	+	-1.10309	-0.768831	-0.590093	-0.311719	-1.0722	-0.941217	-0.570379	-0.475312	-0.924086	-0.773207	-0.958252	-0.996142	-1.37834	-1.08545	-1.69928	-1.95434	-0.837312	-0.335314	0.696968	1.08662	0.927447	1.11799	1.16576	0.822176	0.861379	0.76416	0.085367	0.0906382	0.163351	0.281595	0.418489	1.35453	1.43365	0.138559	0.0763278	0.326275	-0.148932	1.7294	1.62533	1.75748
Akr1c13	+	1.3153	-0.204349	1.37904	1.5728	1.40487	1.46648	1.34442	1.52276	-0.510032	-0.670483	-1.24087	1.0194	-0.201363	-0.667682	-0.449548	-0.650562	0.343959	-0.821088	1.09672	-1.29067	-1.13964	-0.749366	-1.13039	-1.02619	-0.718605	-0.452647	1.24279	1.42837	-0.779403	-0.338601	-0.831705	1.22974	-0.158821	-1.20014	-0.398538	-0.207468	-0.666077	-0.392949	-0.899046	1.42959
Akr1e2	+	-0.770937	-0.195496	0.0957374	-0.00479023	-0.837312	-0.589399	0.101102	0.0300002	-0.647944	-0.717606	-0.274187	-0.268753	-1.06247	-2.42257	-0.585065	-1.35423	-1.54808	-1.56842	0.848353	0.995505	0.634168	1.2114	1.06352	0.691837	0.6962	0.602244	0.938314	0.507281	0.861312	0.905462	1.07331	1.28747	1.06547	-0.650949	-0.761761	-1.63012	-1.27329	1.12657	1.26193	1.16621
Akr7a2	+	-0.57659	-0.766817	-0.122366	-0.575028	-0.451119	-1.17387	0.468311	0.236411	-0.145255	1.54016	0.0371957	-0.255043	-1.39068	-1.29703	-0.826214	-0.401777	-1.30692	-2.06148	0.758825	0.54138	0.586802	0.21536	0.535743	0.692791	1.30249	1.09518	-1.37025	-1.14251	-1.39969	-0.52619	-0.145556	1.82078	1.70799	0.575137	0.353195	-0.342047	-0.254181	1.69361	0.969803	1.39945
Akt1	+	0.340846	0.203115	0.487235	0.494562	0.0227429	0.199098	0.0827796	0.173633	-0.145629	0.143775	-0.00232809	-0.0446217	-2.00067	-2.74658	-1.81985	-2.02172	-2.00136	-1.70054	0.927482	0.755276	1.05724	0.869156	0.987183	0.846441	0.64113	0.896283	0.401092	0.317184	0.518334	0.559034	0.654089	1.08596	1.03732	-0.0891325	-0.189934	-1.04442	-1.02134	0.495742	0.176785	0.454601
Akt2	+	0.308957	0.24509	0.432384	0.493814	0.445225	0.415521	0.367298	0.388348	0.305948	0.328479	0.301632	0.334043	-0.221628	-3.40705	-0.20903	-0.548155	-3.22539	-0.49496	0.354385	0.586311	0.242075	0.529063	0.545737	0.374932	-0.075067	0.298711	0.530817	0.479071	0.460146	0.516217	0.506201	0.515818	0.607179	-0.661773	-3.06079	-0.79029	0.116365	0.813654	0.507978	0.342729
Akt3	+	0.0424306	0.0302239	0.139284	1.18977	-0.2044	0.392715	0.66449	0.320747	0.196904	-0.0402837	0.7593	0.18492	-1.06083	-1.34796	-2.44422	-0.350602	-1.49223	-1.42614	0.747601	1.13479	0.473384	-0.985255	0.845677	-2.25538	0.364437	-0.125675	0.758803	0.338192	1.53903	0.877614	1.25823	0.861648	0.950063	0.095599	-0.713412	-1.72806	0.376239	0.72939	0.4619	-1.55893
Alad	+	-1.04703	-1.02027	-0.822838	-0.323004	-0.930516	-1.18266	-0.570786	-0.629562	-0.59345	-0.682353	-1.02816	-1.2223	-1.21025	-0.659303	-1.05706	-1.18014	-0.835925	-0.66025	1.19402	1.25147	1.18402	1.16257	1.24707	0.48315	0.666022	0.714242	1.1338	1.27567	1.136	1.29863	1.35253	0.99271	0.784151	-0.951335	-0.432497	-0.282449	-1.50914	0.891408	1.05142	1.01239
Alas1	+	0.0909856	0.378496	0.657119	0.763559	0.844582	0.431883	0.0359315	0.254785	0.18869	-0.0742328	-0.155009	-0.0374342	0.373433	0.357065	0.768238	0.542244	1.19332	0.961702	-0.915126	-0.25849	-0.18791	-0.212539	-0.414286	0.677374	0.105041	-0.330065	-0.453916	-4.00555	-2.79739	-0.789357	-0.877335	0.023064	0.168274	1.31059	1.11605	1.07018	0.817387	-0.858622	-0.0183366	-0.744397
Alb	+	-1.42319	-1.35063	-1.70688	-1.66093	-1.38027	-1.38409	-1.34016	-1.36188	-0.778915	-0.724447	-0.987318	-1.05725	-0.0504512	-0.062974	-0.881623	-1.01041	-0.272576	-0.300798	0.80482	0.973167	0.905314	0.89307	0.853739	0.932328	0.913181	1.01571	0.320987	0.376196	0.427137	0.469465	0.516127	1.05428	1.10254	1.48785	1.42842	1.04691	1.04041	0.381263	0.446495	0.345375
Alcam	+	-0.998879	-1.23515	-0.86413	-1.30587	-1.83273	-1.27618	-0.800668	-0.733725	-0.972149	-1.06395	-1.06089	-0.938559	1.30781	1.31071	1.15149	1.24982	1.34191	1.30273	0.0968131	0.0176575	0.285844	-0.0818041	0.0688962	0.398023	0.269505	0.199043	-0.625264	-0.628754	-0.712151	-0.705631	-0.884149	-0.51462	-0.348948	1.16487	1.11946	1.01794	1.27142	1.30707	1.38296	1.32023
Aldh16a1	+	-1.58292	-1.09924	-2.07169	-0.273311	0.742241	-0.418664	-0.457811	-0.731292	-0.806735	-0.704856	-0.0512871	-0.871567	-1.65788	-0.833593	-1.85269	-1.38855	-1.21316	-0.739563	1.00483	0.764939	0.693788	0.528365	0.848291	0.902537	1.12917	1.57747	0.549181	0.692875	0.778672	0.415264	0.442798	0.831795	0.786486	0.0909422	-0.079593	0.0381046	-0.202367	1.36416	1.46779	1.38707
Aldh18a1	+	1.13484	1.09275	1.0589	0.968248	1.0981	0.980264	1.28454	1.17735	1.31033	1.30006	1.28869	1.43046	-0.463984	-0.439362	-0.28969	-0.167405	-0.926757	-1.02932	0.440326	0.476324	0.12859	0.0339957	0.0562502	-0.531815	-0.540186	-0.605249	-0.124644	-0.0899732	-0.2036	-0.199958	-0.174456	0.743522	0.687467	-1.30789	-1.36865	-1.64657	-1.54423	-1.64642	-1.5933	-1.79754
Aldh1a1	+	-0.696164	-0.346868	-0.784935	-0.89281	-1.00349	1.52393	-0.874875	-0.67942	-1.04041	-0.934079	-0.695492	-1.20729	-0.813704	-0.500458	-0.575093	-0.758392	-0.782624	-0.467222	1.40619	-0.711641	1.38799	1.45311	1.41827	1.37459	1.34196	1.22872	-0.890989	-0.413896	-1.07714	-0.598925	1.34126	1.39365	1.4296	-0.0935212	0.611211	-0.481997	0.734238	-1.08265	0.835986	0.923368
Aldh1b1	+	0.905632	1.09822	-0.113967	1.37917	1.02763	1.46721	1.25628	1.50122	1.15955	1.18136	1.33772	1.38155	-0.866861	-1.46162	0.305952	-0.960576	0.701178	0.844698	-0.868895	-0.331136	-0.325608	-0.589535	-0.805979	-0.907192	-1.40201	-1.45653	0.70901	0.797458	0.55754	-1.43141	-0.428402	0.129108	-0.272253	-0.210528	-0.300517	-0.420674	-1.17453	-1.33246	-0.731367	-1.34844
Aldh1l1	+	0.74113	0.526904	0.442216	-0.0504318	1.02257	0.601119	0.268338	0.316702	0.811789	0.835595	0.635904	0.865544	0.994656	0.777707	0.105478	0.554691	0.031029	0.305983	0.0601971	0.0681364	0.174845	0.180285	-0.0472724	-0.0474266	0.268114	0.198381	-3.25689	-3.25093	-1.27149	0.417511	-0.555629	0.0416335	-0.409274	0.601288	0.102796	0.467709	0.123031	-2.67344	-0.571156	-0.407329
Aldh1l2	+	-0.288572	-0.227621	-0.557863	-0.586782	-0.511015	-0.459005	0.949688	0.996475	0.899457	0.911128	1.02054	0.976768	1.04267	1.15282	1.36284	1.33747	0.144082	0.179217	-0.0486613	-0.216284	-0.709694	-0.702919	-0.621236	-1.29504	-1.33044	-1.343	-1.62452	-1.50811	-1.63995	-1.62388	-1.85867	0.279673	0.341244	1.17435	1.20806	0.152916	0.229488	0.971574	0.914787	0.908015
Aldh2	+	0.794638	0.635832	0.92917	1.00559	0.752844	0.654016	1.47364	1.36571	1.04896	1.00033	1.15562	1.20299	0.684295	0.526678	1.37048	1.38019	0.925325	1.04361	-0.411536	-0.298158	-0.711493	-0.547836	-0.63895	-1.5793	-1.5402	-1.20868	-0.640898	-0.779799	-0.783695	-1.26565	-1.01331	-0.155905	-0.0900938	-0.787426	-0.857379	-0.201086	-0.129533	-1.42419	-1.49076	-1.39406
Aldh3a1	+	-0.112672	-0.138707	0.000182329	-0.0230659	-0.143258	-0.111821	0.111286	0.12466	0.0433	-0.0139722	-0.0112163	0.0283722	-1.34602	-0.935474	-1.25448	-1.31613	0.583378	-1.39838	1.22042	1.24769	1.27431	1.26388	1.27215	1.22361	1.19433	1.20995	0.620435	0.624815	0.592411	0.676508	0.667824	1.20787	1.24172	-1.14238	-1.33718	-1.48808	-1.35663	-1.42738	-1.45255	-1.41971
Aldh3a2	+	-0.276894	0.468739	1.32444	1.68873	0.406724	0.306348	1.70608	1.66405	0.40473	0.401126	0.746644	0.812291	-0.42306	-0.234935	1.69084	1.82722	0.581658	0.7632	-0.156906	-0.00639536	0.170533	-0.0340377	-0.288044	-0.915153	-0.879451	-1.1146	-0.400702	-0.860743	-0.503375	-0.893535	-0.737857	0.550832	0.5159	-1.89253	-1.12276	0.0644892	-0.452726	-1.88598	-1.3455	-1.66939
Aldh4a1	+	1.27796	1.29109	1.15055	1.05581	1.18987	1.07075	1.25888	1.37777	1.16863	1.14207	1.24303	1.31118	-0.0308223	0.136647	0.250204	0.343269	0.0922646	-0.00692679	-0.424014	-0.415212	-0.530243	-0.598307	-0.626455	-0.727017	-0.722225	-0.794167	-0.986397	-1.06037	-0.989321	-0.97996	-0.936102	0.597424	0.579229	-0.533168	-0.224655	0.105035	-0.0456443	-2.08833	-1.92888	-1.99344
Aldh5a1	+	0.325741	0.317811	0.153115	0.604141	0.257192	0.324447	0.935408	0.79319	0.687116	0.796022	0.709409	0.885502	0.909667	1.67767	1.40448	1.55321	1.26152	0.0757677	-0.90129	-0.940904	-1.31537	-0.473366	-0.132491	-0.673134	-0.0420143	-0.495536	-1.6811	-1.61905	-2.18622	-1.28504	-0.930974	-0.455424	-0.0353184	0.64777	0.488052	0.940295	1.09589	-1.24071	-1.48219	-0.953284
Aldh6a1	+	0.581852	0.821509	1.76878	1.71629	0.953133	0.841334	1.56072	1.53135	0.573148	0.936862	0.925301	0.941553	-0.132612	-0.0506132	1.23366	0.753588	0.155799	0.156311	0.198541	-0.0457709	-0.579246	-0.159307	-0.314518	-0.90693	-1.16769	-0.316461	-1.11135	-1.10011	-1.40628	-0.152566	-0.541578	0.630774	0.432619	-0.666992	-1.81258	-1.07463	-1.98574	-1.11999	-0.841526	-1.22663
Aldh7a1	+	-1.27819	-0.920981	-0.67293	-0.953274	-0.737489	-1.08075	0.110461	0.15965	0.0466585	0.00168053	-0.328454	-0.141888	0.71485	0.610978	1.15421	1.23848	0.562046	0.411647	0.573167	0.721746	-0.103329	-0.117356	-0.287379	-0.703588	-0.505791	-0.8198	-1.47253	-1.74579	-1.95355	-1.23921	-1.13742	0.389983	-0.046364	0.980742	1.01403	1.14646	0.752118	2.0458	1.99142	1.61995
Aldh9a1	+	0.129068	0.0264257	0.143966	0.324612	0.406261	0.417863	0.311159	0.407498	0.211372	0.049546	-0.0836943	-0.317835	-1.68033	-1.95921	-2.21216	-1.82673	-1.39003	-1.48013	0.730589	0.732393	0.623542	0.811785	0.659585	0.0577831	0.19302	0.874879	0.29846	0.372652	0.275943	0.518768	0.555419	2.71587	2.34047	-0.463108	-0.359296	-0.00772416	-0.500877	-0.288942	-0.794534	-0.824337
Aldoa	+	-1.11925	-0.65148	-1.58337	-1.53398	-1.32922	-1.33706	-0.724542	-0.424513	-0.608793	-0.205626	-0.485666	-0.286319	-1.41329	-1.15035	-1.40764	-1.32605	-1.20163	-0.996982	1.22314	1.36669	0.85086	0.96371	1.10005	1.00973	0.689828	1.0279	1.06042	1.36977	1.23466	0.644457	0.717511	0.281237	0.420384	0.318498	0.566596	0.00923976	-0.0916455	1.03968	1.04534	0.93772
Alg1	+	1.07016	0.693701	0.526095	1.10836	0.902709	1.09103	0.818562	1.05757	1.01314	1.27081	1.20126	0.955945	0.871805	1.10937	0.123129	0.738613	0.935396	-0.0501317	-1.40583	-0.429617	-0.335945	-0.468396	-0.0683429	-0.958777	-2.07879	-0.936226	-0.927097	-1.23099	-1.14526	-1.57352	-1.467	-0.218472	-0.166994	0.610093	0.942287	-0.777642	0.680943	-1.23167	-1.48905	-0.761225
Alg10b	+	0.826521	0.74941	0.778206	0.726896	0.649928	0.529281	0.65679	0.800816	0.563849	0.947046	0.798078	0.824525	0.850928	0.827362	0.750541	0.919648	0.725673	0.572532	0.148618	-1.93068	-0.316986	-2.18137	-1.69895	-0.0438619	-2.62992	-2.43867	-0.378458	-0.16282	-0.222653	-1.67695	-0.385154	0.25482	0.0925896	0.0996907	0.466532	0.311425	0.392839	-0.587764	-0.210199	-0.400106
Alg11	+	0.404749	0.236211	-0.516884	0.0256817	0.795456	0.142004	0.659144	0.566711	0.608945	0.495543	0.381691	0.365794	1.72592	1.66034	1.68338	1.42206	1.71115	1.25739	-0.890794	-0.511947	-0.590464	-0.270983	-1.1128	-1.41864	-1.93739	-1.30098	-0.899918	-0.638255	-1.2659	-1.6197	-1.27299	0.422515	0.295147	0.33297	-0.176991	1.04499	0.609978	-0.959141	-0.785577	-0.678409
Alg13	+	-0.75082	0.368006	0.300579	-0.222387	0.776448	1.48195	1.20109	1.06853	0.546449	0.832418	-0.144726	0.295577	0.951383	-0.699105	0.388063	2.09416	0.303121	1.20915	-2.5226	-0.30318	0.4467	-0.518101	-0.0779436	-0.124938	0.85744	0.0579924	-1.3689	0.0184961	-1.06292	-1.48624	-1.08814	0.0860884	-0.442088	-0.552205	0.783508	1.78909	-1.07417	-0.487298	-1.2355	-1.69498
Alg2	+	0.914709	0.999668	-0.0867859	-0.688034	-0.0492889	-0.27667	0.510151	0.724941	0.812055	1.10944	1.07114	1.00266	0.99177	1.13272	-0.584305	-0.417714	0.177821	-0.224238	-0.208089	0.266631	-0.418794	-1.26196	-0.783977	-0.540369	0.409049	-0.437188	-1.46431	-2.07307	-1.7508	-2.15645	-1.37405	-0.269954	0.0980887	1.43826	1.12128	1.67433	1.69556	-0.445717	0.019027	-0.657542
Alg3	+	1.55968	1.47383	1.28877	1.41654	1.19724	1.12362	0.887598	1.20664	0.793198	0.89755	1.11704	0.653048	0.699991	-0.00598334	0.17584	-0.351844	-0.821322	-1.27077	-0.341032	-1.23125	-0.969993	-0.650504	-1.13909	0.0714391	0.384216	0.0508073	0.0434397	-0.449042	-1.13768	-0.438648	-0.9731	0.469291	0.978815	-0.476266	-0.305829	-0.630407	-0.446373	-2.94662	-1.13873	-0.76411
Alg5	+	0.883226	0.8519	0.541243	0.715518	0.582273	0.820432	1.08777	1.0653	1.03567	1.29992	1.20787	1.1654	0.640188	0.709854	0.933504	0.8215	0.467414	0.416398	-0.0813812	-0.237519	-0.717075	-0.646822	-0.718507	-1.10262	-1.01444	-1.18675	0.198618	0.302529	0.845931	-0.699899	-0.650253	-0.352219	-0.519589	-0.331557	-1.50742	-0.0045913	-0.149357	-1.81173	-2.66375	-2.19698
Alg8	+	-0.76928	-0.612345	-0.243844	0.138621	0.496849	0.679934	-0.320473	0.559751	0.784596	-1.53937	-0.48711	1.09011	-0.342836	1.95432	1.65227	1.76016	1.75723	1.80773	-0.30872	-0.381971	-0.552019	-1.22776	-1.45087	-1.14126	0.0502512	-0.18761	0.0133353	-1.45967	-0.155209	0.0597055	-0.219204	-0.854811	-0.799505	1.69323	1.48394	-0.860768	-0.369097	-0.291598	-0.385549	-1.02116
Alg9	+	1.72941	1.36864	1.81663	1.64766	1.08028	1.48132	1.43431	0.907551	0.684773	0.97228	0.562309	1.01155	-0.188135	0.311487	0.332907	0.0647874	-1.07746	-0.69052	-0.0907686	-0.247139	-0.608588	-0.671852	-0.417866	-0.954607	-0.238573	0.0228426	-0.823804	-0.573194	-0.436936	-0.23752	-0.622113	0.229021	0.279358	-0.679995	-0.321139	-0.0345741	-1.16345	-2.0649	-1.73548	-2.05851
Alkbh3	+	-0.906862	0.223378	0.525077	-0.927635	-2.26488	-1.088	-1.0505	-0.670912	-0.584005	-0.29556	-1.7883	-1.7637	-0.0198471	-2.22931	-0.386377	-0.893938	-0.759699	-0.800197	0.83923	0.770389	0.87892	0.709743	0.765944	0.715954	0.793931	0.636761	1.09351	1.12107	1.11567	1.0014	1.08467	0.712961	0.823142	0.280614	-0.0292542	-0.443254	-0.251085	0.915948	1.04933	1.09568
Alkbh5	+	-1.64154	-1.31615	-0.771704	-0.416684	-1.67541	-1.90531	-1.16127	-1.31424	-1.01305	-1.14232	-1.01194	-0.77595	-0.694912	-0.732728	-0.863897	-1.2276	-0.351612	0.239604	0.10395	0.539281	0.819042	0.727508	0.839238	1.35911	1.25808	1.58884	0.794229	0.697103	0.673996	0.903015	0.726469	0.959401	0.75949	0.408916	0.129625	1.05731	0.663808	0.914053	0.999336	0.854925
Alkbh7	+	1.30138	1.12188	1.05347	1.03767	1.08326	1.20032	0.855139	0.902917	0.522043	0.931841	0.967045	0.823935	-0.523575	-0.668709	-0.560187	0.255312	0.250458	0.0319576	0.400811	-0.712613	-0.296182	-0.540211	-2.07414	-0.00361958	-1.22344	-1.33324	0.265682	-2.17473	0.747342	-1.48203	-0.228964	-0.535223	-0.288272	0.798899	-0.225919	-1.30417	-0.996934	-1.22765	2.06015	-0.211707
Alkbh8	+	-1.02035	1.36126	-0.336717	-0.2322	0.670432	-0.792295	-0.301009	0.397698	-2.00666	0.744262	-1.85448	-0.049484	-1.43183	-0.384724	-0.730939	-0.848957	-0.953927	-0.868795	1.39885	1.37005	0.780242	1.57103	0.969561	0.164751	-0.0140289	-0.191736	0.449052	1.01186	0.866977	1.41312	1.29586	0.968943	1.29064	-0.541446	-0.278197	0.365077	-1.16175	-0.666992	-1.39257	-1.03056
Alox12b	+	0.82509	-0.246926	0.480894	-0.650964	-0.282255	-0.545309	-0.675546	-1.31919	-1.79842	-0.365744	-1.46755	-0.669215	-1.31668	-0.610281	0.161474	-0.338932	-0.0248912	-1.2071	1.24873	-0.727115	1.63486	1.89533	0.434575	1.50779	2.01672	2.26134	-0.485062	-0.939081	0.330694	-0.00933857	-0.845995	1.06333	-0.0539858	1.05197	-0.470352	-0.23018	0.764031	-0.226313	0.270352	-0.440754
Alpl	+	0.760612	0.577048	0.776136	0.511162	0.666178	0.77522	0.274728	0.237944	0.670691	0.583905	0.390788	0.539312	-1.407	-1.42474	-0.925561	-1.06824	-1.03821	-2.30972	0.685168	0.531218	1.1239	0.753097	1.20095	1.3158	1.38991	1.34272	-0.0423208	-0.372812	0.271978	0.38685	0.148459	0.612541	0.576928	-0.511871	-0.886895	-1.1835	-1.33002	-1.92742	-1.72348	-0.951452
Als2	+	-1.36645	1.17036	0.0534355	-0.294461	0.254709	0.605915	-0.304707	0.465557	-1.5118	-1.87958	0.10476	0.0212878	-0.325502	0.519862	-0.836356	-3.56375	-0.547106	-0.678392	-0.241318	-0.108092	0.694831	0.608553	0.318857	1.48295	1.30957	0.65492	-0.0873281	1.32	1.60754	1.07945	0.089869	0.134699	-0.286967	0.565451	0.372772	-1.48761	-0.45658	0.786857	0.0518783	-0.298089
Alyref	+	1.37303	1.14879	1.57293	1.45271	1.19494	1.30758	0.876294	0.70706	1.38141	0.823801	0.287769	0.243053	0.42844	0.833422	0.0640573	0.521094	0.328456	0.144975	-0.368769	-0.529252	-1.22716	-1.08187	-0.83583	-1.10298	-1.28151	-1.07846	0.80915	1.06789	0.180763	0.290157	-0.523063	-1.13898	-1.24115	-0.62058	-0.0519728	-0.775471	-0.263281	-1.21435	-1.31872	-2.38437
Amacr	+	0.0564758	0.203342	-0.243661	-0.172133	0.0648673	0.346411	0.447582	0.440992	0.219216	0.205646	0.15171	0.27401	1.72128	1.73661	1.96428	2.10243	1.49932	1.40225	-0.534146	-0.814578	-1.02452	-1.17116	-1.05882	-1.52348	-0.677839	-1.8361	-0.873081	-0.875294	-1.06925	-0.964985	-0.869919	-0.44839	-0.558194	0.813302	0.512355	1.12375	0.979922	-0.719896	-0.130266	-0.70004
Ambp	+	-0.331338	-0.66449	1.55867	1.30595	-0.66946	-0.496878	0.219862	0.30023	-0.64269	-2.00358	-1.47313	-0.647438	-0.470737	-0.716605	1.75345	1.48497	-0.151016	1.35125	-0.126635	-1.26195	-0.571367	-0.261522	0.30432	0.0379523	-0.638276	-1.38169	1.3118	1.37795	0.565252	1.00034	0.841767	1.3858	1.03612	-1.61765	0.518963	-0.55681	-1.49297	-0.324011	0.0335533	0.112039
Ambra1	+	0.600593	0.106976	0.590946	0.68767	0.403866	0.503832	0.450073	0.270485	0.285465	-0.30852	-0.554197	0.481179	-2.06641	0.222884	-1.35189	-1.35734	-2.77719	0.70297	0.649901	1.00709	0.37	-0.211628	0.793392	-0.480456	-0.193835	-0.405261	1.07882	1.18103	1.37238	1.17544	0.980267	0.429418	0.259231	-0.310004	-0.249352	-0.385438	-3.09933	-0.29515	-0.684474	0.12656
Amdhd2	+	-1.17644	-1.26583	-1.51267	-1.27597	-1.26376	-1.33653	-0.801633	-0.712595	-1.33441	-0.978468	-0.96495	-0.933949	-0.93026	-0.980629	-0.937875	-0.576258	-0.377973	-0.501889	0.821813	0.687913	1.05899	0.884503	0.816713	1.31229	1.37503	1.25939	0.257011	0.112474	0.0618975	0.476141	0.44288	0.736083	0.742522	0.765608	0.729398	0.28625	0.19142	1.68931	1.63193	1.52253
Amfr	+	-0.128047	-0.463812	0.201279	0.797552	-0.353087	-0.429325	-0.0700727	-0.00955793	-0.997471	-0.809085	-0.687725	-0.617122	1.67202	1.40725	1.73351	1.45972	1.61042	1.90664	-1.04666	-0.86282	-0.82862	-0.689224	-0.604056	-0.779713	-0.594119	-1.06433	-1.48412	-1.23463	-1.19354	-0.92786	-0.859787	-0.0883326	0.108521	0.948818	1.01654	1.40176	1.65038	0.290779	0.259957	0.357963
Ammecr1	+	-0.327482	-0.556369	-1.81644	-0.701526	-0.748134	-0.35127	-0.186814	-1.35893	-0.366326	0.0604294	0.0203859	-0.0971697	-1.34359	-0.589961	-2.29776	-1.3043	-0.607579	-2.2595	1.11674	1.09661	0.807697	0.863881	1.36967	1.11046	1.45398	1.00522	1.29038	0.599285	1.1749	0.771121	0.714286	1.13214	0.855651	0.0435311	0.253288	-0.698638	-0.289411	-0.0928728	-0.178059	0.432459
Ammecr1l	+	-0.0798035	0.312956	0.662195	0.457839	0.135329	0.125182	0.305641	0.213671	0.0509543	0.354861	0.0269591	-0.0815087	-1.68502	-1.75257	-3.42512	-2.8849	-1.85274	-1.50816	0.636266	0.680804	0.548992	0.580896	0.541747	0.875656	0.708277	0.95898	0.195857	0.467751	0.40709	0.51842	0.392719	0.547558	0.738134	0.209093	0.136838	0.231567	0.177952	0.163523	0.419062	0.48705
Amot	+	0.330043	-0.170896	-0.0114454	-0.0247191	-0.290584	0.0488205	0.875173	0.728406	0.524394	0.550639	0.161695	0.0270983	1.09728	1.80265	1.29608	1.36558	0.972017	-0.0208439	0.303682	-0.39532	-1.37983	-2.42674	-2.47192	-0.878377	-0.503473	0.185824	0.379691	-1.22621	-0.684384	-0.208931	0.290781	-1.89447	-0.602388	0.229782	-1.6999	0.305237	0.230611	1.23853	1.0208	0.925622
Amotl2	+	-0.117366	-1.02822	0.441451	0.339127	-1.45726	-1.06931	-1.85523	-0.735174	-1.90634	-1.42806	-0.718696	-1.22575	-0.3825	-0.575905	-0.57782	-0.38824	-0.43582	0.00608135	1.31326	0.203317	1.27411	1.34625	1.4271	1.07043	1.0625	1.30154	-0.0312863	0.0899085	-0.266524	0.816576	1.01352	1.73172	-2.06353	0.704947	0.506825	0.272319	0.345855	0.328374	0.270444	0.397368
Ampd2	+	-0.575485	-0.308957	-0.415582	-0.448372	-0.449603	-0.564563	-0.337704	-0.294253	-0.397238	-0.46494	-0.496729	-0.615963	-1.81806	-1.51318	-2.01689	-1.93173	-1.38101	-1.7285	1.0911	1.00832	1.13887	1.16082	1.17762	1.4005	1.20022	1.2565	0.850672	0.74917	0.630641	1.14677	0.953466	0.761417	0.862883	-0.109876	-0.0796552	-0.624946	-0.548489	0.618274	0.445245	0.66926
Ampd3	+	0.925436	-0.179732	0.831219	-1.90128	-0.590833	-0.779785	-0.923708	0.990247	-0.852653	-2.3648	1.08418	-1.21778	-0.0354848	-1.38604	-1.5687	-0.506089	-0.316575	-0.546381	0.406929	0.548127	0.529916	0.305902	0.514262	-0.277319	-0.964251	0.354421	0.0914301	0.590367	0.0567984	-1.44305	-0.446724	0.80883	0.614702	0.778636	0.305249	0.386935	0.845728	1.95353	1.6954	1.68294
Anapc1	+	-0.116266	-0.029855	-1.14153	-0.250141	-0.779244	-0.662523	-0.794496	-0.0952722	-0.435986	-0.496655	-0.570758	-0.358322	-1.42966	0.536524	-1.59181	-1.50926	0.181878	0.550165	0.120689	-0.112026	0.222219	-0.301554	0.14069	-0.331791	-0.360224	-0.503802	-0.709951	-1.35873	-1.04359	-0.242012	-0.187753	1.20025	1.55518	2.33656	2.1484	1.47167	1.89229	0.947477	0.531993	1.57723
Anapc10	+	0.495677	1.09489	-2.98001	-0.160486	0.10402	0.618939	0.666239	1.09363	0.0815966	-0.131627	0.567755	1.15846	0.00341037	0.261546	0.170461	-1.82385	-1.3802	-0.733924	0.857828	-0.009194	-1.55843	0.2065	0.940631	0.558676	-0.622666	-0.286069	1.69209	1.5415	1.63784	0.499249	0.0686374	-0.416009	0.459947	-1.11271	-0.875192	-1.35292	0.496042	-0.111763	-1.02186	-0.698648
Anapc11	+	0.950307	0.48615	1.10584	0.66687	0.744289	0.296256	0.134389	0.306198	0.846145	0.472304	0.116908	-0.752064	-0.588921	-1.93025	0.0454919	-0.367942	-1.43001	-1.60822	-0.352726	-2.37193	-0.696911	-0.516363	-0.133721	0.65015	-0.177924	-0.768226	2.12167	2.0684	-0.405144	0.811326	0.2862	0.479206	0.396705	-0.158095	-0.432522	-2.43157	0.258372	0.833761	0.594492	0.451097
Anapc2	+	-0.592074	-1.69234	-0.122893	0.473837	-0.32216	0.338985	-0.46975	-0.278604	-0.620152	-1.74564	-0.918271	-1.14505	-0.939067	-0.0132651	-0.867706	-1.36046	0.832771	0.729985	0.445287	0.839843	0.817788	0.54502	1.03359	-0.872585	-0.940788	-0.186216	0.926933	0.527843	0.11441	0.0776331	-0.0138527	1.16256	2.01272	-0.323555	-0.557332	-1.2311	-1.19153	1.83099	1.73514	1.95906
Anapc4	+	1.08945	0.412515	0.289557	0.306717	0.286693	0.36509	0.152135	0.254972	0.353643	-0.0296064	0.395147	0.157917	-2.65411	-1.56916	-2.40132	-2.04039	-1.75094	-2.20203	0.683019	0.706018	0.205758	0.574905	0.37185	0.393254	-0.0360962	-0.0149559	0.460787	0.174793	0.386667	1.0236	0.659092	1.34712	1.39953	-0.535829	-0.159422	-0.548725	-0.467298	0.874252	0.404986	0.680405
Anapc5	+	0.0109318	0.88704	0.695906	-0.0527614	0.24648	0.208046	0.433413	-0.770344	-0.303032	-0.189362	-0.722	-0.924816	-1.1389	-0.704547	-2.14638	-2.30296	0.0660377	-1.16788	0.551995	0.20762	-0.0783145	-0.448235	-0.192209	0.605306	0.648808	1.00582	-1.19299	-0.287335	-1.29592	-0.621428	-1.18926	1.66385	2.05798	0.0279208	1.05052	1.92964	0.897306	1.115	0.689942	0.729095
Anapc7	+	1.64455	1.25894	0.683382	1.13609	1.14535	1.25588	0.481984	0.619611	0.064381	0.492299	0.367704	0.51154	-1.38518	-1.5608	-1.60078	-1.8585	-1.55375	-0.023946	-0.154917	-0.202905	-0.637227	-0.342166	-0.198323	-1.06972	-1.47634	-0.472174	0.442475	0.746867	0.383062	0.637714	0.287681	0.198272	0.4791	0.586681	2.565	-0.00677922	-0.988091	-1.20805	-0.472935	-0.775986
Angel2	+	0.222968	-0.279774	0.0602235	-0.231404	0.0128017	0.538007	1.00815	0.605056	0.560449	0.595504	0.868296	0.717004	0.728957	0.142372	0.831562	-3.36044	-0.130869	0.770904	0.919053	0.740219	0.529904	-0.0475238	0.240045	0.273821	0.411167	0.800764	-0.480245	-0.472417	0.575352	-0.530631	-0.48121	1.22571	1.32828	-0.818315	-1.25099	-1.47743	-2.24742	-0.0629626	-2.24963	-0.585303
Angptl2	+	-0.281477	-0.498426	-0.88561	-0.764139	-0.742417	-1.08972	0.229827	0.253889	0.200087	0.303724	0.448678	0.532809	1.48319	1.46747	1.70463	1.73651	0.826948	1.04639	-0.640443	-0.545665	-0.594723	-0.597675	-0.529881	-0.593876	-0.365826	-0.221792	-1.59313	-1.22614	-1.46723	-1.33361	-1.70311	-0.780064	-0.761568	1.18575	1.16734	1.71546	1.40984	0.598477	0.372292	0.533217
Ank2	+	-0.369561	-0.272291	-0.874621	-0.0463904	-1.28173	0.10084	0.343194	0.186631	0.306822	0.349222	0.262416	0.274751	-1.6571	-0.530468	-1.08725	-1.19878	-2.69272	-1.60281	0.927027	0.768285	0.722877	0.608901	0.702005	0.643158	0.684435	0.502351	-0.229184	0.226201	0.90266	0.590623	0.475258	1.58844	1.71543	0.169858	-2.4038	-0.448845	-1.02018	0.982422	0.96665	0.715278
Ank3	+	0.121158	-0.0966282	0.140505	0.439386	-0.165505	-0.278626	0.0551268	0.538966	-0.403369	-0.243218	-0.0589411	-0.10013	-0.784648	-1.5023	-1.34526	-1.00834	-0.579857	-0.705181	0.680302	0.65046	0.654968	0.526262	0.923516	1.85025	1.37979	1.21827	0.519394	0.877854	1.1878	0.362354	0.329211	1.31374	1.78244	-2.17451	-1.90752	-1.76776	0.479613	-0.77026	-1.33691	-0.802397
Ankfy1	+	-0.207951	-0.491732	-1.07147	-0.462359	-0.388612	-0.37045	0.10234	0.152862	0.0561899	0.340126	0.0520097	0.0401275	-1.5688	-1.34165	-2.00885	-1.83959	-2.17232	-1.33547	1.33737	1.42082	1.01	0.502414	0.846457	1.22031	0.955117	1.12188	0.671796	0.826258	0.459991	0.391369	0.237727	1.57985	1.2948	-0.138465	-1.22535	-0.89431	-0.63261	0.500924	0.374127	0.655106
Ankhd1	+	-0.269031	0.435097	0.00340738	0.23544	-2.29696	-0.122281	-0.195051	-0.590255	0.317397	-0.586709	-0.0954207	-0.313885	-1.33306	-0.761811	-2.10472	-3.05102	0.375824	-1.4989	0.914823	0.797741	1.09788	0.895539	-0.0966354	1.00809	1.21784	0.829634	0.684944	0.365038	-0.116164	0.816591	1.02876	1.07918	1.27524	-0.277562	-0.411992	0.693745	-0.814001	0.863316	-0.108273	0.108206
Ankib1	+	-0.154865	-0.697945	0.419612	0.850102	-0.60788	-0.13858	2.13047	1.24668	0.689213	-0.826318	1.39708	0.87457	0.553707	0.35847	0.152403	-1.68486	-1.4583	-1.93058	0.730892	0.214344	1.29334	0.539796	-0.206517	-0.231498	0.0328656	0.771323	-0.708823	-1.32447	-1.30272	-1.03602	-0.133512	0.925336	0.995046	-1.27841	1.80446	-1.48965	0.482854	-0.285046	-0.662396	-0.304176
Ankle2	+	0.709907	0.691228	-0.582384	0.584064	1.01189	0.356252	0.948479	0.962395	1.25571	1.01703	0.193353	0.437636	1.23621	1.81113	0.94275	0.32747	0.647279	1.12209	-0.43536	-0.662198	-0.562471	-0.863722	-0.660386	-1.14139	-2.54891	-1.55418	-0.0558907	0.749543	0.0856112	-0.56009	-0.137163	-0.183649	0.228925	-0.847968	-0.228495	0.439293	0.533541	-1.70143	-2.10223	-1.46389
Ankmy2	+	-0.137622	-0.189278	-0.379998	-0.529199	-0.515696	-0.406975	0.017134	-0.0707769	0.183724	0.423051	-0.0480837	-0.313607	-2.48706	-1.5077	-2.15833	-1.28644	-0.00639345	-0.583783	0.910012	0.979143	0.617736	0.856529	0.956487	0.733171	0.655262	0.934552	0.152895	0.513478	0.339237	0.666609	0.805163	1.33676	1.11974	-1.65786	2.58063	-1.36164	-1.01658	0.109831	-0.371836	0.137709
Ankrd11	+	0.582577	-0.766251	0.106107	-0.212871	-0.338178	-0.765086	-1.22493	-0.674755	-1.13889	0.428557	-1.41908	1.17424	0.282543	-0.614866	0.0365223	0.517386	0.283033	-1.14753	1.01887	1.4344	0.14221	1.28847	0.0989035	0.72827	1.17145	-0.746197	-2.09565	-1.00406	-0.540284	-1.39341	0.328614	2.06846	-0.948213	-0.802577	0.709576	2.41762	0.351654	-0.41696	0.136176	0.944152
Ankrd13a	+	0.0276586	-2.50712	0.0355362	0.352788	-0.151777	-0.050233	-0.0992552	-0.092256	-0.299062	-0.0807606	-0.360884	-0.576869	-1.16916	-2.85449	-2.79778	-1.65168	-0.595031	-0.552979	0.529528	0.519565	0.907018	0.519639	0.822539	0.973412	0.968636	0.642112	0.810833	0.860621	0.655872	1.07377	0.795849	1.09602	0.943519	-0.216617	0.0871048	-0.137286	0.0357174	0.68707	0.533778	0.314639
Ankrd13b	+	0.567162	0.512853	0.227059	0.449631	0.396268	0.21406	0.652169	0.408381	0.48826	-0.202003	-0.594221	-0.0623583	-1.07269	-1.12256	-0.651144	-0.685597	-1.16338	-0.0655241	1.08566	0.577978	0.87655	0.127813	1.49282	0.902149	1.43871	1.46486	0.443685	-0.0598153	-0.37949	1.00376	0.712053	1.65317	0.849285	-2.05162	-1.24258	-1.71822	-1.81147	-1.58351	-0.516886	-1.56127
Ankrd17	+	-0.471568	-0.605317	-0.537283	-0.341749	-1.20114	-0.78251	-0.733601	-1.01018	-0.946743	-0.812623	-1.0787	-1.11454	-1.32941	-0.589024	-2.21199	-2.69775	-0.511399	-0.49817	0.4186	0.532175	0.978568	0.642724	0.824124	0.874572	1.39161	1.22536	0.528327	0.336337	0.710102	0.575987	0.928329	0.831312	0.670922	0.740662	1.20097	0.652315	0.401158	0.975686	0.799305	1.23454
Ankrd28	+	0.264724	0.16709	0.151623	0.365134	0.243505	0.213092	0.110358	-0.53957	0.435949	-0.622742	-0.0429379	0.228126	-1.4852	-0.180672	-2.02415	-2.04337	-2.21537	-1.09056	0.815613	0.91852	0.74604	0.705947	0.95253	0.804981	0.986935	0.738445	0.367823	0.374695	0.301137	0.383351	0.261715	0.725044	0.349673	1.80124	-1.37407	-2.60998	-1.00514	0.934722	0.508478	0.377274
Ankrd40	+	-0.48278	-0.161544	-0.294905	-0.426456	-1.31928	-0.540651	-1.82534	-0.734874	-1.68614	-0.866765	-0.500497	-2.10298	-0.734951	1.04419	0.254771	-0.224553	0.588223	-0.817167	0.470051	-0.601627	-0.127605	-0.718551	-0.390053	0.251036	0.42946	0.270836	-0.160622	-0.212586	-0.0389856	0.408118	-0.454854	0.30523	-0.0142743	1.3207	1.89457	1.54912	1.00169	1.73159	1.96821	1.95026
Ankrd50	+	-0.954817	0.315532	-0.346531	-0.980627	-2.6072	-3.17447	0.162859	-0.304988	-0.475638	-0.651919	-0.382016	-0.138662	0.330249	0.243145	-0.136913	-2.40357	0.394396	-0.0865532	0.285952	0.495554	0.408059	0.843198	0.34726	0.756245	0.228261	0.377568	1.12525	1.04847	1.08956	0.286541	-0.0577199	-1.1902	0.0941777	0.151573	1.08595	-0.302556	0.625287	1.20394	1.29796	0.997402
Ankrd52	+	-1.48325	-0.716444	-2.11898	-1.6264	-1.76093	0.00467611	-1.08436	-0.00321179	-1.06646	-1.31361	-0.771381	-0.636136	-0.663618	-0.830404	-0.864019	-1.26157	-0.30806	-0.599674	0.584165	0.809019	1.2167	1.01924	0.76217	0.770566	0.576288	1.15946	0.334492	0.796009	0.491837	1.03514	0.395063	0.461265	0.918978	0.291636	0.576127	-0.13457	0.64364	1.35228	1.2584	1.78593
Anks1a	+	-0.695297	-0.187862	-0.482753	-0.159602	-0.505832	-0.29345	-0.420843	-0.112973	-0.0751276	-0.112039	-0.29313	-0.460153	-3.38748	-0.876856	-0.269287	0.322636	-3.30227	0.298835	0.45281	0.633952	0.668158	0.720212	0.845535	0.928825	1.13769	1.0118	0.415257	0.536841	0.321322	0.755789	0.496749	0.925005	1.05872	0.537935	-1.74143	-0.815299	0.557766	0.625114	0.509047	0.431689
Ankzf1	+	-0.115089	-0.770476	-0.163314	-0.357897	-1.04797	-0.606199	-0.218633	-0.526273	-0.961512	-0.340188	0.00381257	-0.395292	-0.604503	-0.81863	-1.94659	-2.09712	-1.28661	-1.75813	0.895118	0.542512	0.752068	0.903189	1.03344	1.60252	1.40295	1.39899	0.313568	0.277937	0.663219	0.740945	0.53151	1.18009	0.79952	-1.57411	-0.576351	-0.750786	1.63647	0.754426	0.593356	0.890034
Anln	+	-0.889072	-0.719162	-0.87068	-0.718473	-0.910222	-0.909684	-1.24396	-1.20413	-1.27946	-1.16138	-1.3951	-1.18133	0.705737	0.56618	-0.814026	-0.862468	1.45654	1.42158	-0.177659	-0.208216	-0.153989	-0.202442	-0.306959	-0.143191	-0.192726	-0.132565	0.105198	0.113399	0.241874	0.34827	0.399464	-0.314995	-0.517567	1.39856	1.33767	1.39848	1.65207	1.80296	1.72207	1.83941
Ano1	+	0.544473	0.702596	0.207989	0.338388	0.55492	0.615107	0.45996	0.412953	0.475028	0.432363	0.520482	0.505573	-0.617062	-1.07809	-1.27935	-1.74267	-0.454955	-0.3152	0.500219	0.364266	0.731376	0.478106	0.782279	0.822875	0.579076	0.834504	0.232026	0.517981	0.535039	0.355028	0.305631	0.531416	0.525801	-0.859769	0.0557108	-0.689926	-0.0723324	-2.90976	-0.0321065	-3.86994
Ano10	+	1.02792	1.10287	1.09362	0.914269	1.02149	0.85578	0.907332	0.86245	1.17839	1.21357	1.1769	1.15342	0.675729	0.89333	0.793711	0.723148	0.540061	0.314096	-0.539159	-0.386198	-0.327001	-0.337758	-0.318153	0.000197881	-0.20238	-0.0511027	-1.46827	-1.56436	-1.56128	-1.25832	-1.40788	-0.117529	-0.0882678	-0.373449	-0.589782	-0.066259	-0.0372072	-1.90407	-1.83885	-2.01103
Ano6	+	0.266429	0.531755	0.385167	0.160417	-0.198595	0.0152246	0.36367	0.987709	0.385137	0.411058	0.67365	0.373603	1.1871	1.13839	1.31649	1.34879	1.33573	1.1089	-1.07546	-0.688149	-1.11876	-1.52118	-0.915216	-1.16702	-1.43352	-0.301703	-1.20441	-1.72095	-1.78386	-1.80969	-1.47861	-0.13198	-0.123185	0.471471	1.40987	0.879743	1.15291	0.222942	0.251092	0.295054
Ano8	+	0.307399	0.0293575	1.39145	0.262017	-0.854226	0.475284	1.15453	0.406122	0.153962	0.369133	0.280699	0.13104	0.824499	1.19676	0.484679	1.18478	0.48716	0.305493	-0.135413	-0.797351	0.726441	-0.614737	0.668593	-0.00235386	1.03563	0.389293	-2.6445	-1.24175	0.708509	0.186694	-2.79965	-1.32984	0.354664	0.0680979	1.2436	-1.76218	-1.52692	-0.373764	-0.950395	0.207189
Anp32a	+	0.213645	0.0678143	-0.360295	-0.169463	-0.312803	-0.201094	-0.185094	-0.249848	0.220663	0.0671708	-0.0194159	-0.163635	-1.54507	-1.52957	-2.04776	-1.99651	-1.17974	-1.33996	1.02268	1.10015	1.05203	1.06067	1.06742	1.52727	1.52442	1.41769	0.698294	0.544548	0.584938	1.03289	1.0071	1.03017	1.1588	-0.909125	-0.994639	-1.10451	-1.02235	-0.280186	-0.330605	-0.456681
Anp32b	+	0.031371	-0.236337	-0.613516	-0.186435	-0.166322	-0.35938	-0.224249	-0.198733	-0.167774	-0.385892	-0.0687209	0.0761217	-1.28876	-1.30165	-2.06787	-2.19188	-0.490445	-0.43843	0.857351	1.28243	0.939697	1.2323	0.893816	0.974275	0.880668	0.456826	1.29393	1.33764	1.19772	1.27262	0.968045	1.1069	0.942323	-1.25618	-1.15154	-1.56859	-1.64213	0.22424	0.152132	-0.115576
Anp32e	+	0.380342	0.255872	0.161706	0.346325	0.275837	0.140842	-0.0092146	0.0268911	-0.146993	-0.088745	-0.137114	-0.130316	-1.81172	-1.83583	-1.86576	-1.81954	-0.876873	-0.770618	0.828155	0.966669	0.67974	0.836182	0.680592	0.777497	0.709358	0.752392	1.53291	1.44509	1.35569	1.09056	1.20436	0.793077	0.562092	-1.2066	-1.41194	-1.71111	-1.53617	-0.0708523	-0.390916	0.0181426
Anpep	+	1.34428	1.32179	1.28444	1.30769	1.36805	1.3363	0.537678	0.585922	0.615594	0.510843	0.449327	0.61185	-0.988775	-0.896922	-1.73275	-1.95878	-0.312243	-0.0512669	0.32808	0.348088	0.199655	0.186181	0.219078	-0.330414	-0.234038	-0.0817572	0.749937	0.72736	0.720887	0.683561	0.717721	0.193531	0.265907	-1.61829	-1.09264	-1.25444	-1.34797	-1.56885	-1.6864	-1.45822
Antkmt	+	0.0168169	-0.250396	1.49753	0.791844	0.471446	0.678315	1.05403	0.849564	1.14278	1.27898	-0.279456	0.465201	-0.159153	-1.44679	-0.461649	-0.180902	1.1011	0.290184	-1.6854	-0.590612	-0.633522	-0.116539	-0.431514	-0.600863	-0.214691	0.0141851	-1.92393	-1.99651	-0.331436	-1.47091	-0.903168	1.07031	0.942482	1.63333	1.8684	-1.42689	-0.247562	-0.386661	-0.447963	1.02002
Antxr1	+	-0.382578	-0.611093	-0.247791	-0.300532	-0.366247	-0.447575	0.926663	0.590342	0.116566	0.549234	0.783466	0.528113	1.54183	1.33705	2.06938	2.24175	0.664197	0.719028	-0.869098	-0.172422	-0.823755	-0.793106	-0.637162	-1.61007	-1.42165	-1.29501	-1.55295	-1.17857	-1.48802	-1.30127	-1.09613	0.939743	0.610825	0.396679	0.106574	-0.0209536	0.0470448	0.920136	0.828931	0.698438
Antxr2	+	0.208221	0.208432	-0.472483	-0.42834	-0.185272	0.118156	0.328137	0.148686	0.116844	0.268218	0.119837	0.238516	1.13974	1.15471	1.19954	1.15499	0.944279	0.921702	-0.271645	-0.535402	-2.28924	1.18056	-0.319787	0.0840847	-1.76244	-1.7638	-1.59938	-1.03089	-2.04361	-0.21359	-1.86909	-0.0637457	-0.885976	1.06365	0.983484	0.831505	0.957118	0.861085	0.726687	0.776516
Anxa1	+	-1.44185	-1.50964	-1.31054	-1.27413	-1.27968	-1.24325	-0.892149	-0.842033	-1.07053	-1.06422	-0.904915	-1.05282	0.867031	0.927329	0.712849	0.686895	1.58054	1.60891	0.181863	0.26054	0.0617038	0.155277	0.126948	-0.277493	-0.284015	-0.224604	-0.16561	-0.199852	-0.212026	-0.630123	-0.533197	-0.144437	-0.146771	1.09306	1.15852	1.08815	1.14342	1.61323	1.7166	1.72101
Anxa10	+	-0.818293	-0.924564	0.740495	-1.50131	-0.377111	-1.10206	-0.221554	1.11008	-1.47138	-0.83964	0.974353	0.112227	-0.831406	-0.961686	-0.727213	-1.65197	0.34277	-1.09745	0.846745	0.789444	1.03771	1.10153	1.32881	1.87554	1.54241	1.93899	0.475788	1.06558	0.609413	0.562556	0.714919	-0.734456	-0.508546	-0.257748	-0.516563	0.311346	-0.133719	-0.356084	-1.11207	-1.33588
Anxa11	+	-0.795486	-0.927688	-0.922594	-0.934771	-0.714124	-0.550146	-1.13318	-0.918881	-1.36745	-1.13658	-0.780799	-0.849706	0.802043	0.680457	0.202959	0.572624	1.31382	1.21087	1.09587	1.03058	1.5685	1.62738	1.60372	1.52005	1.67969	1.60476	0.0710715	0.334923	0.187635	-0.146367	-0.411803	-0.0732276	-0.21056	-0.709123	-0.500299	-0.299486	0.0523535	-1.28098	-1.11759	-1.37846
Anxa2	+	-0.218465	-0.288293	-0.181014	-0.314843	-0.157031	-0.187326	0.0504176	0.00290873	0.0501329	0.0283847	0.0536299	0.124674	1.87159	1.8737	1.84966	1.90656	2.0282	1.94199	-0.497004	-0.499494	-0.797036	-0.743046	-0.777101	-1.15114	-1.14836	-1.17148	-1.00344	-1.01655	-0.982788	-1.20489	-1.19001	-0.87378	-0.905896	0.614815	0.728763	0.940572	1.06121	0.00838725	0.112042	0.0613522
Anxa3	+	-1.31891	-1.1529	-1.139	-1.18908	-1.29201	-1.14139	-0.956866	-0.892251	-0.921532	-0.909439	-1.06405	-1.15593	-0.500843	-0.342195	-0.724765	-0.786246	0.0162611	0.00803586	0.507565	0.539715	0.582866	0.655605	0.718439	0.371964	0.486712	0.408471	0.196679	0.101585	0.00905979	0.150647	0.29494	0.3436	0.296603	0.889605	0.945491	0.438683	0.127834	2.42316	2.52366	2.45024
Anxa4	+	-1.09539	-1.28515	-0.643503	-0.564439	-0.538792	-0.961754	-0.833557	-0.681532	-2.02131	-2.20471	-1.12925	-0.801848	1.35401	1.1456	1.40109	1.30763	2.13865	2.02136	0.788417	0.906787	0.949086	0.734486	0.90655	0.344444	0.467213	-0.186818	-0.41905	-0.526985	-0.527621	-0.254643	-0.57338	0.258013	0.188471	-0.0135515	0.602411	0.28435	0.643676	-0.603779	-0.238363	-0.336816
Anxa5	+	-1.71457	-1.64795	-1.20815	-1.62816	-1.62908	-1.76341	-0.823155	-0.982405	-1.07169	-1.15007	-0.985887	-0.982052	-0.443885	-0.361988	-0.519676	-0.567188	0.691425	0.566849	1.17283	1.24597	0.875758	0.946795	0.777995	0.0339254	0.0468792	-0.115367	0.88356	0.897376	0.744581	0.633342	0.591735	0.511766	0.601445	0.55098	0.624502	0.581782	0.480955	1.38073	1.45361	1.29988
Anxa6	+	-1.30507	-1.34528	-1.24404	-1.29957	-1.19074	-1.16127	-0.774507	-0.822254	-0.957698	-0.968533	-0.679163	-0.640851	1.59657	1.61771	1.74262	1.68198	1.83531	1.82965	0.371662	0.286819	0.0673024	0.212948	0.0924982	-0.314105	-0.297151	-0.349507	-0.71587	-0.779863	-0.641607	-0.633452	-0.555487	0.0174505	0.0277713	0.690868	0.788158	1.28627	1.27303	0.428594	0.389678	0.439148
Anxa7	+	-0.724355	-0.774051	-0.736666	-0.859304	-0.20054	-0.436339	-0.576802	-0.641007	-0.793652	-0.6866	-0.367077	-0.37492	-0.795363	-0.847217	-2.53813	-2.41392	0.387375	0.493363	1.72345	1.67384	1.50573	1.68706	1.45615	0.922549	0.821235	0.919739	0.917828	0.768987	0.885493	0.715964	0.965384	0.280358	0.199973	-0.244286	-0.20278	-0.652425	-0.42983	-0.419083	-0.297986	-0.312131
Anxa8	+	-0.123514	-0.104208	-0.206617	-0.271358	-0.0875779	-0.0956005	-0.117003	-0.15757	-0.109767	-0.126467	-0.00379689	-0.0485022	-1.28445	-1.34131	-1.76671	-1.78146	-0.776641	-0.919615	1.42739	1.44275	1.29774	1.32652	1.32638	1.1802	1.14356	1.15599	1.04553	1.03392	1.03841	0.931776	1.03035	0.681873	0.656127	-1.42351	-1.13723	-0.802142	-0.710309	-1.14429	-1.04654	-1.13234
Ap1ar	+	1.3797	1.58229	1.74238	0.282487	-0.0691941	-0.071685	0.497494	-0.182996	-0.586956	-0.200001	0.414023	-0.0913893	-0.282752	-0.437962	-0.371867	-1.61184	0.943414	0.503651	0.971974	0.618873	0.333688	-0.225505	0.137025	-0.400033	0.687957	0.326275	0.389782	0.082425	-0.695918	0.691481	1.10813	1.33294	0.802346	-1.7826	-1.16597	-2.35201	-0.00422193	-2.43336	-1.86057	-0.0015005
Ap1b1	+	-1.13433	-1.0903	-1.36595	-1.34248	-1.21028	-0.75897	-0.381984	-0.379685	-0.681174	-0.407461	-0.779727	0.131982	-0.0707535	-0.264044	-1.58847	0.108125	0.317818	-2.39279	1.62378	1.49453	1.19117	1.10825	0.717666	0.878765	1.46286	0.99927	1.22181	1.42912	1.52687	0.814478	0.198004	0.32099	0.754716	-0.943325	-0.695077	-0.276516	-0.0965033	0.120439	-0.37701	-0.183804
Ap1g1	+	-0.804308	-0.519549	-0.613002	-1.04655	-0.74039	-0.828759	-0.253177	-1.00631	-0.344255	-0.243007	-0.584702	-0.356931	-1.0702	-0.890528	-1.27084	-0.974702	-1.13309	-1.21347	1.42376	1.51461	1.61312	1.64278	1.68606	1.24799	0.84936	1.0729	0.729665	0.447555	0.360159	0.701084	0.650075	1.09508	1.12262	-1.43228	-1.23555	-1.16779	-0.261962	0.325968	0.818738	0.689822
Ap1m1	+	-1.13272	-0.885939	-1.43189	-0.946962	-1.44225	-2.07754	-0.987018	-0.910584	-0.869934	-1.12305	-1.56149	-1.31219	-0.368885	-0.249149	-0.284942	-0.0475904	-0.0984511	-0.0935222	0.472852	0.634024	0.752229	0.823627	0.894333	1.27621	1.31774	1.17445	-0.451056	-0.489586	-0.432617	0.175104	0.319712	0.959342	1.10676	1.11771	0.298148	0.558189	0.899695	1.51372	1.54897	1.35454
Ap1s1	+	-0.71746	-0.0943881	-1.10286	-2.15098	-0.771231	-0.429875	-0.199722	-0.0630346	0.129246	-0.329568	0.190355	-0.487018	1.13744	0.915067	-0.294023	-0.375325	-0.389946	-0.102947	1.20846	0.804908	1.41062	1.37752	0.674829	0.652853	0.932739	1.32656	-0.21582	-0.480145	0.216658	-0.0336643	-0.258069	1.39467	1.45642	-3.40296	-0.653316	-0.636045	-1.50409	0.251825	0.318258	0.29405
Ap1s2	+	-0.809796	0.886814	-1.18866	-0.861027	-0.623018	-1.37558	-1.56604	1.45881	0.906174	0.561562	0.786605	1.09296	-1.40331	-0.88184	0.116895	0.100257	-1.35264	-0.974656	1.54098	0.742728	1.01856	-0.0525209	1.1488	-0.89448	-0.85026	-0.362302	0.892173	2.48561	1.58728	-0.654822	0.245902	-0.910211	0.646782	-0.767714	0.433117	-0.27094	-0.263505	-0.146073	0.424106	-0.866714
Ap2a1	+	-1.1304	-1.73286	-2.00594	-2.19026	-1.95422	-2.02171	-0.01615	-0.36294	-0.0814005	-0.215886	-0.0740968	-0.344009	0.263783	0.673376	0.517563	0.49552	0.304638	-0.29683	0.777317	0.65496	0.387282	0.489076	0.705478	0.874436	0.371218	0.465395	-0.511374	-0.797557	-0.927022	-0.358096	-0.0218976	1.13782	1.38038	-0.141161	0.0170118	0.399442	0.363287	1.68813	1.57438	1.64333
Ap2a2	+	-1.18409	-0.804588	-2.65138	-2.53938	-1.67473	-1.98625	-0.472149	-0.424464	-0.456479	0.114464	0.0793083	-0.119284	0.771286	0.736692	0.301379	0.993244	0.72304	0.401707	1.41559	1.14108	0.0732509	0.735772	0.443705	0.614086	0.48522	0.501172	-0.0479529	-0.0873147	-0.595103	-0.439406	0.240031	-0.654174	-1.03587	1.0247	0.484278	1.75402	1.09779	0.589699	-0.0327309	0.483841
Ap2b1	+	-1.8265	-1.57687	-1.79777	-2.05957	-2.07449	-1.88519	-0.340541	-0.328988	-0.91049	-0.62853	-0.64442	-0.634268	0.378038	0.269005	0.313438	0.696725	-0.159994	0.0569707	1.30548	1.26615	0.875708	0.801798	0.838989	-0.366789	-0.282031	-0.259965	0.949799	0.820119	0.942361	0.745005	0.976899	0.649613	0.494929	-0.136537	-0.254974	0.177057	0.0636703	1.42399	0.983409	1.13877
Ap2m1	+	-1.39106	-1.69794	-2.51076	-2.99686	-1.59171	-1.45907	-0.528759	-0.427818	-0.0179206	0.122302	0.39217	0.0247744	1.41835	1.25034	0.351437	0.252836	0.500383	0.434193	0.822634	0.881568	0.417367	0.332824	0.273496	0.238526	0.163009	0.0289265	-0.376609	-0.54983	-0.421451	-0.393964	-0.206995	0.600134	0.223688	0.963737	0.962957	1.2127	1.54691	0.184843	0.640136	0.330492
Ap2s1	+	-0.410717	-0.488352	-0.998901	-2.09414	-0.389606	-0.856102	0.891068	0.0510357	0.596777	0.365864	0.188486	0.460147	1.08696	0.853687	0.823466	0.697152	0.941832	0.388024	1.09398	1.23883	1.47558	1.38769	0.55647	0.30027	-0.175381	-0.126851	-0.72335	-0.958999	-1.66128	0.0448588	0.29623	1.23807	1.08948	-2.23519	-2.04187	-1.09326	-1.07485	-0.794613	0.372778	-0.315268
Ap3b1	+	-0.0836122	0.204852	-1.03591	-0.565171	-0.490953	-0.453643	0.331957	0.299622	0.331445	0.459744	0.308744	0.395985	-1.53954	-1.31501	-1.9232	-2.66591	-1.89901	-1.66109	1.1781	1.08079	0.898788	0.818877	1.01605	0.810248	0.914759	0.810011	0.446378	0.388074	0.258064	0.504676	0.511118	0.879868	0.926681	-0.21038	-0.0486461	-1.15917	-1.29351	0.965215	0.759761	0.84494
Ap3d1	+	-0.324491	-0.0182442	-1.34003	-1.20221	-0.577527	-0.688166	-0.369587	-0.302977	-0.0387981	0.395615	0.0224771	-0.11021	-1.18031	-1.0128	-1.92813	-2.41375	-0.85987	-1.12437	1.2153	1.29018	0.638936	0.764455	0.941851	1.6168	1.25685	1.46569	-0.897834	-0.746285	-0.850396	-0.270782	-0.218841	1.27035	1.45585	0.180637	0.34652	0.230546	0.598823	1.00537	0.986214	0.79316
Ap3m1	+	0.0942457	0.537543	0.0369803	-0.22616	-0.646386	-0.673124	0.210346	0.373877	0.421361	0.178457	-0.404358	-0.161373	-1.51197	-2.08739	-1.65998	-1.64004	-3.41703	-2.27219	0.326006	0.560357	0.343703	0.607243	0.547051	0.505166	0.64373	0.846952	0.440432	0.493697	0.771382	0.692522	0.32565	0.544752	0.363365	0.80403	0.355321	0.492785	0.811103	0.58509	0.804896	0.981951
Ap3s1	+	-0.294897	0.206836	-0.263753	-0.404282	0.0295854	-0.402212	0.337357	0.0639648	0.475731	0.327569	0.338501	0.837952	-0.0830312	-0.344366	-3.62297	-0.510095	-1.33381	-2.11305	0.976262	0.910212	0.0622822	0.528707	0.359957	0.31212	-2.77086	-0.504112	1.15	1.11866	1.18286	0.713847	0.619513	0.366043	0.559642	0.190124	-0.3393	-0.330772	-0.290321	0.653217	1.03949	0.247389
Ap4b1	+	-0.0904197	0.0316835	-0.64642	-1.281	0.587312	1.0636	1.01661	0.545842	1.2551	-1.98286	-0.640317	-0.473697	-0.789392	-0.742426	0.673946	-0.983699	-0.803001	-1.84923	1.16902	0.632479	-0.143932	0.320112	0.995211	-0.158606	-0.527695	0.0956119	0.728681	0.707234	0.165151	1.01451	0.509733	0.723755	0.685364	-1.10896	2.94601	-1.91157	-0.621006	0.161449	-0.667538	-0.606655
Ap4e1	+	-0.0605592	-0.373607	-0.259236	-1.2246	0.23346	-1.62567	-1.58509	-0.629703	0.312029	-0.858851	-2.78315	0.679462	-0.156672	-0.193432	0.112505	0.0292728	1.06584	-2.23343	-0.107474	-0.245387	0.296371	0.352491	0.677054	1.31015	1.30755	1.36945	-0.869919	-0.390762	-0.814323	0.0661892	0.00987007	0.751388	0.491903	1.58016	-0.114843	-0.297005	0.266601	1.39312	0.919301	1.59954
Ap4m1	+	0.0282811	-0.964462	0.0891868	-0.11226	-1.76362	-1.01195	0.198915	-0.92853	-1.11137	-1.35467	-2.07843	0.000590014	0.0605663	-1.67654	-1.83177	0.451639	-0.192843	-0.113624	0.612829	0.923848	1.15034	0.720191	0.78301	1.0072	0.285666	0.882203	0.829012	1.00054	0.935179	0.95131	1.09346	1.02371	1.15937	-1.56779	-0.391289	-0.603787	-1.1288	0.842249	0.917805	0.884642
Ap5z1	+	0.0326336	0.279237	0.944237	-0.891449	-0.672982	-1.08597	-0.404529	-0.78524	-1.4375	0.262392	-0.22122	-1.46673	0.0281501	-0.717805	0.146549	-0.962394	0.485129	-0.655375	2.02771	1.07488	0.994022	0.222991	1.85235	1.44083	0.498163	0.612102	0.465817	0.238208	-0.104703	0.71184	-0.647992	1.19668	-0.958525	-1.66238	2.12526	-1.84	-0.169999	0.0829369	-1.26752	0.230205
Apaf1	+	-0.0255575	-0.0684598	0.253029	0.3035	-0.171271	-0.0255212	0.0619848	-0.085805	-0.240641	-0.466991	-0.215526	-0.0495331	-1.90308	-1.34825	-1.11013	-1.74589	-1.02026	-4.04516	0.359682	0.564646	0.570203	0.659637	0.520453	0.691293	0.835267	0.854006	0.278966	0.270223	0.183824	0.377307	0.381557	0.987742	1.06423	0.529056	-0.0798594	-0.453456	-0.440523	1.21971	1.19385	1.33575
Apbb1	+	-0.558679	-0.66468	0.431438	0.0438691	-0.46081	-0.722683	-0.331778	0.150249	-0.630787	-0.48822	-0.842993	-0.328669	1.32987	1.56747	1.58322	1.79775	1.82364	1.62959	-0.847071	-0.68005	-0.426628	-0.674249	-0.687447	0.0684411	0.154907	0.173022	-1.00928	-0.781221	-1.06795	-1.09501	-1.17468	-0.921995	-0.866419	1.26504	1.20656	1.63986	1.95341	-0.310045	-0.451744	-0.795247
Apbb1ip	+	-1.31898	-1.07995	0.0992987	-0.406811	-1.57947	-0.49922	-0.0971724	0.235816	-0.918069	-1.41186	-0.714361	-1.25452	-0.841937	-0.632627	-0.127435	-0.346862	-0.239947	0.458981	0.382965	0.305213	0.564565	0.0197847	-0.100095	-1.96617	-0.675963	-0.217525	0.284538	0.219577	-0.168321	0.581385	0.111088	0.80795	0.893989	0.253474	0.869361	0.951287	0.215057	2.31548	2.4584	2.56907
Apbb2	+	-0.703737	0.514208	0.617108	1.45019e-05	0.241028	-0.0124844	0.57682	0.261484	1.84354	0.195618	-0.439575	0.173023	1.17763	-0.275595	-1.99771	-1.60952	-2.03122	-0.827556	1.04455	-0.215167	0.208652	-0.612311	-0.359815	-0.749083	1.03306	0.171609	0.944815	1.3795	1.35684	1.81566	0.750082	0.606331	0.0374295	-0.412574	-1.86012	0.111815	-2.07755	0.242469	-0.688111	-0.431164
Apc	+	0.142955	0.583763	0.199353	0.378889	0.0286434	0.260032	-0.232397	0.138633	0.392193	0.341154	0.0176703	-0.144065	0.00411984	-1.48603	-2.06195	-0.853754	-0.0136984	-3.19414	0.609507	0.650149	0.522889	0.441017	0.557084	0.576163	0.51906	0.844841	0.568123	1.1174	0.915097	0.69894	0.582662	0.688507	0.609576	0.431493	-3.5405	0.165549	-0.0681657	-0.764098	-0.565802	-0.0608605
Apeh	+	-0.612146	-0.693981	-0.755556	-0.745469	-0.670615	-0.544475	-0.509569	-0.469013	-0.407062	-0.416695	-0.500369	-0.308001	-1.76628	-1.62236	-1.51867	-1.2757	-1.27873	-1.38677	1.36782	1.35953	1.32651	1.2578	1.30394	1.15383	1.06726	1.16689	1.12991	1.03803	1.03313	1.07417	1.07087	0.888724	0.941573	-0.636713	-0.262372	-0.901003	-0.634199	0.206128	0.261332	0.26829
Apex1	+	-1.25613	-0.783525	-1.20243	-0.938419	-1.0453	-0.99536	-0.62789	-0.750561	-0.620927	-0.369274	-0.733684	-0.635941	-1.03411	-0.405401	-2.19343	-1.74822	-0.659742	-0.573178	1.30908	1.58301	1.36148	1.13283	1.27519	1.08937	0.983277	1.19778	0.795963	0.694176	0.896001	0.748925	0.906039	1.40933	1.25895	-0.515233	-0.393042	-0.116648	0.24379	0.301234	0.18983	0.222181
Aph1a	+	-0.0225843	0.722302	0.805977	0.741803	0.67976	0.613863	0.869896	0.451585	0.599767	0.504199	0.60183	0.628307	0.0907008	0.701122	0.948896	1.21887	0.972546	0.971748	0.122531	-0.235885	0.0471817	-0.487516	-0.174837	-1.74726	-1.13208	-1.03264	0.00876242	-1.05374	0.0497857	-1.80355	-1.36804	0.292698	0.646427	0.804624	1.32294	-0.356671	-1.98894	-1.97538	0.461569	-2.50056
Api5	+	-1.26873	-1.07808	-1.21626	-1.11942	-0.875892	-1.48748	-0.339533	-0.631909	-1.32865	-0.665798	-0.976816	-0.640527	-1.49974	-1.15313	-1.49819	-1.19171	0.136048	0.137459	1.03266	0.981547	1.19641	1.19961	1.10811	0.969679	0.965272	1.51502	0.93294	0.824202	0.702169	1.15726	1.40956	1.02755	0.952594	-0.431715	-0.584461	0.43983	-0.184938	0.548068	0.579348	0.357639
Apip	+	-1.47087	-0.825072	-2.15067	-0.530181	-0.82889	-0.500216	-0.341095	-0.548204	-1.04195	-1.1041	-1.24319	-0.747421	-0.259445	-1.03245	-0.553246	-1.44406	0.436676	0.171426	1.19337	1.08328	1.03093	1.13445	0.941092	0.750589	0.466739	0.760502	0.911324	1.05552	0.976939	1.09956	0.951277	1.18799	0.989911	-0.521667	-0.529192	-1.20199	-1.38207	1.06517	1.06574	0.983484
Aplf	+	0.057868	0.615503	0.357016	0.262547	0.252998	0.191057	0.314806	0.190249	-0.0233809	0.292684	0.0497002	0.264591	-1.0739	-1.41558	-1.84124	-1.91201	-1.75626	-2.87014	0.999901	0.90043	0.797123	0.901418	1.0024	1.23285	1.255	1.22323	0.669949	0.505993	0.747506	0.487395	0.583149	0.767107	0.889503	-1.40613	-0.914688	-0.613718	-0.123762	-0.462788	-0.818419	-0.579964
Aplp2	+	0.655975	0.560688	0.56385	0.710159	0.637188	0.70958	0.809073	0.726016	0.256994	0.522422	0.560203	0.57529	0.694389	0.702103	0.535293	0.64189	0.611067	0.727871	-1.28342	-1.2951	-1.35932	-1.35793	-0.929467	-1.71506	-1.02546	-0.697233	-0.763187	-1.07944	-1.23922	-0.896828	-1.38169	-1.25294	-1.16706	1.59323	1.51629	1.86546	1.4554	0.0360144	-0.237218	0.0141417
Apmap	+	1.13285	1.03802	1.99332	1.92192	0.867383	0.801567	0.828858	0.834512	-0.130181	-0.17514	-0.0840314	0.28758	0.394143	-0.287635	0.698981	0.380008	0.149921	-0.00584101	-1.07315	-1.25064	-0.765524	-0.848002	-0.612534	0.130241	0.21293	-0.368279	-2.14981	-2.40278	-2.48601	-0.81189	-1.05583	0.536987	0.518217	0.90552	0.816219	0.222485	0.219624	-0.162405	0.00716581	-0.228785
Apob	+	-0.199402	-0.355623	0.244552	0.62365	-0.363689	-0.0197595	0.458633	0.289498	0.0444527	-0.584984	0.147036	0.300144	-0.900826	-2.47418	-0.0556934	-0.605909	-0.274729	0.0231915	-3.4182	0.0926595	0.272408	-1.59148	0.236627	0.035539	-0.206095	-1.85283	0.438077	0.537518	0.522806	0.451498	0.617266	-0.350505	0.207268	0.355535	1.80707	0.360981	1.91156	1.00647	1.0315	1.23796
Apobec3	+	0.291524	0.997403	0.478089	0.391011	0.821913	0.393383	0.454168	0.691991	0.586378	0.634583	0.0756398	0.528485	-1.66889	-1.03054	-0.829569	-1.35544	-2.68834	-1.27544	1.0448	0.88272	1.12106	0.608318	0.885065	0.0936011	0.0440041	0.300422	0.409483	0.423944	-0.22384	0.0622341	0.360813	1.5929	1.46274	-2.34668	-0.124568	-1.52977	-0.286048	-0.358039	-1.32027	-0.599236
Apobr	+	-0.158243	-0.510424	1.49655	-1.19607	-1.10031	0.154739	-0.204334	-1.52788	0.845768	0.14742	-0.350424	-0.301228	1.16893	0.739754	2.08883	2.11739	0.95376	1.65778	0.874128	-0.692131	1.26674	-0.479736	-0.637153	-0.48924	0.125851	0.0985392	-0.202684	-1.38318	0.521031	-0.988101	-1.96299	-0.554906	-1.03691	-1.70598	-0.332401	0.324832	0.604661	0.0488993	-0.0389219	0.61764
Apoh	+	1.04035	0.654066	0.461077	0.255441	0.596667	0.96531	1.0783	1.3299	1.01088	1.61243	1.29686	1.07669	0.428634	1.11635	0.972849	0.782472	0.843159	0.666881	-0.970613	-1.12778	-1.28464	-2.44818	-0.132865	-0.940047	-0.867599	0.602159	-1.01298	0.248966	-0.974428	-0.858869	-1.65801	-1.18402	0.454266	-0.975875	-0.167864	-0.498354	-0.674636	-0.795217	-1.02539	0.103652
Apom	+	0.817714	0.840649	0.694862	0.761985	0.777264	0.813505	0.767669	0.774811	0.832356	0.909512	0.673359	0.860154	-0.857608	-1.25393	0.28069	-1.43458	0.616127	-1.58528	0.821084	0.644087	0.90473	0.555213	0.776408	0.911801	0.989253	-1.07084	-1.25944	0.589308	-1.96957	0.631685	0.710646	-1.31845	-0.87071	-1.38726	-1.22794	-1.12521	0.7474	-1.26472	-1.2019	-0.874841
Apoo	+	0.73874	0.813498	1.10795	0.831971	0.799621	0.732082	0.399523	0.78317	-0.0544296	0.477419	0.418819	0.161847	-0.0418562	0.187563	0.0989717	0.214422	0.522656	0.459198	-0.0948462	0.842791	-0.0863022	-0.10452	0.234296	0.00980057	0.337929	0.205258	0.256191	0.324188	0.0944491	-0.513111	0.13473	0.165091	0.0465508	-0.276866	-0.67482	-0.745979	-0.648072	-2.55216	-0.835476	-4.77029
Apool	+	0.696886	0.638612	0.531699	0.834337	0.473716	0.633268	0.485891	0.788289	0.758304	0.84359	0.661979	0.705365	0.938645	1.03483	1.20466	1.1233	0.99081	0.93121	-0.875525	-0.476749	-1.31627	-0.979769	-1.1022	-0.641315	-0.963307	-0.957119	-0.878252	-0.998483	-1.09803	-1.42112	-1.52064	-0.195078	-0.193474	1.04395	0.336765	1.47378	1.16284	-1.33376	-2.04568	-1.29596
App	+	0.533325	0.556173	0.428434	0.411745	0.62931	0.613201	0.765625	0.759974	0.788338	0.68965	0.741113	0.789125	1.26814	1.3265	1.29094	1.12885	0.910296	0.891685	-0.884812	-1.11356	-1.37205	-0.979138	-1.39044	-1.70289	-1.76864	-1.61544	-1.00945	-0.991305	-1.07898	-1.07579	-1.21347	-0.944985	-0.805553	0.75273	0.614262	1.04495	1.04889	0.0292612	-0.0793141	0.0132741
Appl1	+	-0.736556	-0.961754	-0.573759	-0.787236	-0.907892	-0.578613	-0.308768	-0.602938	-0.722069	-0.402416	-0.610325	-0.549113	-1.50571	-1.93196	-0.454747	-1.67671	-1.68962	-1.73622	1.20531	0.962381	1.19373	1.00215	1.18042	1.00985	0.972437	0.957803	0.976396	0.76188	0.752555	1.04145	1.03125	1.2866	1.30964	-0.231761	0.395208	-0.62273	-0.385212	0.633317	0.549456	0.754284
Aprt	+	-0.0142216	-0.142119	-0.123094	-0.232736	0.126701	0.197717	0.104888	0.036157	-0.030304	0.116338	0.289345	0.267227	-1.4159	-1.78787	-2.25547	-1.99214	-1.80642	-1.32251	1.29287	1.29905	0.871453	0.836587	0.8887	0.302168	0.306825	0.296912	1.46525	1.22811	1.08422	1.01452	0.970585	0.501731	0.553838	-0.816511	-0.948169	-0.596841	-1.90772	0.455819	0.465384	0.419627
Aptx	+	-0.323056	0.940018	0.412376	0.520599	-0.132069	0.436709	-0.581246	-0.817481	-0.830618	-2.26009	-1.36376	-0.414371	0.844997	-1.31423	0.519382	-1.42401	0.182201	0.259321	0.863485	0.620762	-0.368769	0.906921	0.611561	-0.657256	1.55458	-0.548186	-2.05842	-0.441138	-0.146425	1.22206	0.411979	1.38091	1.20127	-0.682284	-0.381289	-1.87924	0.916592	0.134645	1.28034	1.40323
Aqp1	+	0.0721299	0.248313	-0.851291	-1.14226	-0.247228	0.0713478	1.04336	1.00227	0.965374	0.899764	1.1682	1.21901	1.0979	1.02239	0.885312	1.00799	0.390756	0.00722407	0.336147	0.548475	-0.257538	-0.188632	-0.393975	-2.98328	-0.325001	-0.661773	-0.0912164	-0.204975	-0.23688	-0.0360681	-0.280695	0.143156	-0.0775832	0.150225	-3.58846	0.71719	0.765457	-0.829784	-0.703697	-0.661641
Aqp5	+	-0.314994	-0.0620391	-1.37178	-1.15451	-0.577729	-0.854594	0.128538	0.116124	-0.619773	0.0628463	0.0594763	0.346818	-1.5384	-0.974861	-1.959	-0.320779	-2.76152	-1.59897	0.521554	0.750886	1.1178	1.32875	1.00822	1.10015	1.06693	0.995442	0.169226	0.27641	0.50971	0.51167	0.747967	1.3996	1.5421	0.253475	-1.24509	0.888264	0.645371	-0.154212	0.155562	-0.194627
Aqr	+	1.64562	1.4354	1.85287	1.96359	1.65905	1.37142	0.998589	0.807669	0.50045	0.552141	0.725809	0.680056	-1.06401	-1.34485	-1.25796	-1.0169	0.231819	0.0553854	-0.0527096	-0.264931	-0.224419	-0.371329	-0.313293	-0.145877	0.0284648	-0.00343553	-0.186993	-0.341933	-0.410824	0.093166	0.160627	0.376498	0.21104	-1.041	-0.676393	-0.750699	-0.308237	-1.97112	-1.75965	-1.84311
Araf	+	-0.291559	-0.0422537	-0.687543	-0.0664931	-0.443257	-0.44187	-0.482787	0.115603	-0.12068	0.0935353	-0.0228192	-0.144306	-0.529304	-1.94904	-0.10167	1.79284	-1.39379	-2.5554	1.36996	1.24243	0.689894	0.356509	0.787062	0.841984	1.13218	0.716536	1.0904	1.3417	1.40794	0.57534	0.374492	0.321547	0.712118	-1.88088	-0.771086	-1.891	-0.687113	-0.547879	-0.337953	0.426615
Arap1	+	0.0252152	0.00894146	0.262531	0.114682	0.0173365	0.191613	0.371354	0.370631	0.409723	0.301269	0.285862	0.390668	-1.59747	-1.69582	-1.46408	-2.23652	-1.88233	-1.49998	1.05524	0.989188	1.01103	0.850826	0.836017	0.735082	0.852586	0.80214	0.811894	0.73893	0.792978	0.852517	0.80155	1.43958	1.32804	-1.11725	-0.968326	-1.33696	-1.1145	-0.416626	-0.685661	-0.631875
Arcn1	+	-1.07931	-1.1025	-1.03915	-1.0352	-1.12994	-1.08134	-0.444135	-0.304402	-0.661734	-0.579723	-0.635387	-0.587157	-1.40674	-1.27665	-1.5991	-1.49719	-0.966181	-1.13246	1.21079	1.24649	1.1443	1.02693	1.1086	0.724588	0.653701	0.611667	1.0515	1.07123	1.04877	0.749005	0.774238	1.07387	1.03295	-0.212668	-0.257772	0.0182945	-0.276532	1.35558	1.21811	1.18465
Arf4	+	0.624844	0.652601	-0.407704	-0.824934	0.600446	0.387149	1.1234	1.03558	1.22611	1.61796	1.70743	1.71947	-1.16604	-0.894326	-1.3952	-1.78881	-1.24462	-1.46532	1.39411	1.49056	0.520685	0.554683	0.596327	-0.427667	-0.536945	-0.398564	-1.27411	-1.07561	-1.62174	-0.468012	-0.62798	0.773719	0.472568	-0.359984	-0.409113	-0.464235	-0.407008	0.0873829	0.404606	0.268281
Arf5	+	-2.30653	-0.126684	-1.45003	-1.24981	-0.658332	0.540267	-0.763358	-0.197057	0.110318	-0.416638	0.414633	0.870222	-0.167307	-0.13955	-0.660494	-0.884713	0.123832	1.38977	1.42419	2.37263	1.22828	0.35103	0.539676	0.174323	0.559167	0.0604094	0.853074	0.989783	1.10725	-0.536954	-1.15646	1.46563	0.00299448	-1.34125	-1.57817	-1.70772	-0.110467	0.220907	0.649997	0.00312867
Arf6	+	-0.944356	-1.03926	-0.985177	-1.62713	-0.168598	-0.597922	0.0263031	-0.156219	0.142981	-0.461195	-0.429554	-0.358938	-1.85298	-0.102354	0.262565	0.510573	2.27131	2.19649	1.96943	1.44495	0.677222	1.24816	1.2267	-0.318889	-0.143981	-0.290623	-0.588013	-0.224435	0.607968	-0.912982	-1.10776	1.15923	0.926269	0.494644	-0.330756	0.676471	-0.249389	-1.31092	-0.686657	-0.953177
Arfgap1	+	-1.18533	-1.52679	-1.55683	-1.92433	-2.07373	-1.37123	-0.61607	-1.02629	-1.11965	-1.02045	-1.17676	-1.21878	-0.252037	-0.160029	-0.308752	-0.357306	0.121404	0.0722508	0.923958	0.875517	0.660373	0.768658	0.813321	0.818768	0.812203	0.753711	0.0980806	0.118654	0.293497	0.216257	0.336984	0.944479	1.0707	0.953827	0.871517	0.525397	0.489428	1.47047	1.40659	1.47832
Arfgap2	+	-1.38412	-0.74454	-0.544251	-0.677565	-1.29488	-0.455423	-0.80704	-0.751045	-0.678784	-0.406344	-0.814199	-0.537884	-1.57397	-1.6177	-1.77818	-1.86029	-0.840518	-0.998408	1.0113	0.937416	0.969164	0.908962	0.861977	0.943314	0.778747	0.755521	0.890632	0.972142	0.82902	0.86912	0.826833	1.04443	1.1096	0.0442251	0.12532	-0.303255	0.4372	1.2732	1.15257	1.3277
Arfgap3	+	-1.28085	-1.79414	-0.957321	-1.02399	-1.26187	-1.56236	-0.654299	-0.937173	-1.20897	-0.867742	-0.944533	-0.686384	-0.733463	-0.502658	-0.824862	-0.63917	-0.298707	-0.502104	0.715089	0.568368	0.78539	0.845627	0.826641	0.767661	0.913705	1.07028	-0.218783	-0.146884	-0.102239	-0.263543	-0.285531	1.0988	1.07036	1.1208	1.28019	0.829011	0.575819	1.74676	1.70396	1.77912
Arfgef1	+	-0.146615	-0.817549	-0.473837	-0.905847	-0.951913	-0.767717	-0.818683	-0.970467	-0.637909	-0.314298	-0.572983	-0.817329	-1.58101	-0.711709	-1.62257	-2.88854	0.637199	-0.475253	1.01487	0.921549	0.962292	0.969986	1.2734	1.25027	1.76079	1.31736	-0.00656402	-0.00698014	0.462688	0.74357	0.185012	1.38932	1.4057	-0.257143	1.13355	-0.0190434	0.282428	-0.0425172	-0.206006	0.302504
Arfgef2	+	-1.16838	0.124802	0.533224	-0.05692	-0.223846	0.190189	0.0821143	0.348604	-0.978801	0.103957	-0.0591343	-0.312862	-1.00073	-1.64105	-1.40556	-0.77393	-4.09757	-1.05296	0.40212	0.201475	0.721708	0.708228	0.592797	0.277967	0.819251	1.15996	0.246797	0.486339	0.560271	0.703544	0.676329	0.508969	0.612397	-0.118444	-0.613239	-0.369251	-0.0546396	1.43946	1.69556	0.731263
Arfip1	+	-1.40107	-0.164175	-1.09917	-1.04043	-1.02536	-1.21414	-0.104933	-0.142844	-0.987131	-0.506524	-0.252956	-0.103307	-1.32527	-1.87632	-1.22431	-0.959231	-0.556907	-0.725218	1.27057	1.6655	1.03581	0.8927	0.900983	0.510486	0.309757	0.403898	1.13697	1.00131	1.06284	-0.299745	0.0217653	0.173946	0.342396	0.948437	0.351451	-1.24203	-0.684345	1.66349	1.70037	1.54273
Arfip2	+	-0.00507425	-0.768774	-1.42078	-0.700258	-0.398334	0.332141	0.422566	0.185045	-0.0982769	-0.218242	0.159999	0.266214	-0.522192	-0.56784	-1.53572	-0.302526	-1.80926	-1.47432	1.04829	1.25418	0.418142	0.293884	1.07773	-2.40964	0.0360974	1.00753	1.37393	1.39296	1.53898	1.06175	0.800508	0.842964	0.978826	-1.37147	0.802988	-1.26286	-1.25663	-0.139789	0.351987	0.615258
Arfrp1	+	-0.169786	-0.212346	-0.145382	-0.0413532	-0.895985	-0.671033	-0.59205	0.0206051	-0.452588	-0.427852	-0.70778	-0.362972	0.325894	0.101659	0.0194312	0.339058	-0.255601	-0.0533109	-1.15736	-1.1027	-1.07931	-0.669681	-0.052122	1.4994	1.55926	1.18772	-1.19627	-0.538449	-0.601213	-0.143925	-0.624667	-0.13499	0.144565	2.2298	2.5784	1.94086	2.12328	-0.942865	-1.43123	0.592887
Arglu1	+	0.61884	0.39025	0.546814	0.417953	0.6948	0.55197	0.662747	0.483703	0.401166	0.483736	0.604522	0.55431	0.555408	0.479819	0.635674	0.516098	0.433175	0.453199	0.407696	0.472989	0.201863	0.292386	0.15757	-0.471028	-0.193152	-0.114167	0.593844	0.309451	0.34568	0.223065	0.313699	0.364721	0.271088	-1.86158	-1.92903	-3.48444	-3.382	-0.611694	-0.7882	-0.602949
Arhgap1	+	-0.399982	-0.425781	-0.31105	-0.419247	-0.509495	-0.581731	-0.0274439	0.00802956	-0.457715	-0.402092	-0.134167	-0.136862	-2.27114	-1.41495	-1.1069	-1.24102	-1.921	-1.63082	0.986524	1.13644	0.889064	0.866997	0.981032	0.259867	0.426008	0.321392	0.97513	0.824921	0.649216	0.918504	0.895259	0.657676	0.411862	-0.112376	-0.450958	-0.84197	-1.48011	1.68115	1.72618	1.66156
Arhgap10	+	0.853563	0.921185	0.81762	0.206433	0.148022	0.845211	1.57341	1.32824	1.39119	1.03789	0.951971	1.42979	-1.31426	-0.392997	-0.570033	-0.607119	-2.4804	-2.13109	-0.0438981	0.411361	-1.24639	-0.838737	-1.27555	-0.494351	-0.671245	-1.03124	-1.01382	-0.130376	-1.16931	0.173644	-0.503871	-0.0356967	0.305368	0.870066	1.13006	-0.599468	0.396268	0.130276	0.759742	0.868555
Arhgap12	+	-0.404597	-0.181486	-0.29809	-0.162317	-0.460193	-0.179986	-0.0319066	-0.137854	-0.303133	-0.145063	-0.369268	-0.222141	0.010178	-0.65888	-0.250971	-0.21908	-5.37546	-0.308251	0.552496	0.683421	0.671201	0.686407	0.762318	0.693861	0.703356	0.646719	0.563423	0.55404	0.548908	0.674249	0.533756	0.714006	0.594058	-0.348235	0.00805432	-1.23021	0.334063	0.363747	0.605013	0.383853
Arhgap17	+	-0.423861	-0.710608	-0.658309	-0.66036	-0.319107	-0.777895	-0.607529	-0.697801	-0.413343	0.0241622	-0.334298	-0.812608	-1.15706	-1.17605	-1.66884	-1.60365	-1.78659	-1.7066	0.592263	0.469973	0.935537	1.05078	0.924619	1.62333	1.54849	1.79389	-0.514639	-0.650729	-0.578803	0.0743646	0.21931	0.539027	0.562078	1.12578	1.1983	0.359243	0.852303	0.964577	1.04967	1.35097
Arhgap18	+	-0.979652	-0.518633	1.01722	-0.510744	-0.125341	-0.420419	0.971477	-1.6695	-1.05563	-0.989832	-0.934784	-1.66515	-1.00298	0.0975742	-1.9408	-1.21578	-1.41952	-1.33886	0.745221	0.792503	0.932468	0.876707	0.535245	0.558793	1.22187	1.17195	0.974083	0.834766	0.614071	0.838703	0.807691	0.962085	0.673031	-0.966521	0.550977	-1.05623	-0.436185	0.99213	0.95857	1.11942
Arhgap21	+	-1.27825	-0.530453	-0.606642	-0.106976	-0.642628	-0.238967	-1.49915	-0.582142	-1.41961	-2.16941	-1.32623	-1.71193	0.726981	0.191353	0.334515	-0.0346707	0.622154	0.178551	0.26989	-0.0714818	0.733309	0.47989	0.860501	1.47513	1.49239	1.74502	-0.818062	-0.664908	0.100154	-0.619905	-0.939198	0.870931	0.835024	1.88667	0.00345707	1.0961	1.66015	0.566315	-0.279492	-0.588379
Arhgap23	+	-0.248941	0.28003	-1.83965	-2.75068	-0.830922	0.28156	1.10915	0.90849	1.3454	0.416891	1.22153	0.510623	0.193311	0.0327579	0.232733	0.270807	-2.24609	-1.3819	1.30223	1.68136	0.0327742	0.252643	0.463952	-0.841748	0.10556	-0.137922	0.775856	0.880901	-0.292128	1.02328	-0.422655	1.23365	-0.338462	-0.776251	-1.54039	-0.643738	-0.720001	0.435742	-0.351233	0.371483
Arhgap29	+	0.833728	-0.586814	0.0327134	0.566835	-0.791861	1.22876	-1.2621	-1.30456	-0.94736	0.154263	-0.970319	-0.863235	-2.0349	-0.773424	0.0599491	-1.62251	0.0200264	-0.5081	0.0174653	0.613712	0.0302955	-1.77023	-0.107205	0.393604	1.22549	0.638221	-0.281967	1.25357	-0.857078	0.584906	-1.30228	0.595065	-0.185621	0.701348	0.25487	1.94947	0.425378	1.5753	1.53817	1.47641
Arhgap31	+	-2.4914	0.40557	-0.367552	-0.227568	-0.269041	-1.03184	-0.22521	-0.323004	0.614045	0.697669	-0.513433	0.0496559	0.434976	0.860507	0.289385	1.24436	0.265694	-0.320034	0.107933	-0.143012	-0.0672988	0.356433	-0.770251	-1.59664	-0.37689	-3.1174	0.25957	-0.106934	0.317953	0.0486907	-0.185867	-1.17138	-0.0757981	-0.0173498	-0.0127323	0.496776	1.44885	1.70023	2.00433	1.80802
Arhgap33	+	-2.42988	-1.69699	-1.37012	0.0355117	-1.93862	-0.771319	-0.258105	-0.103521	-1.70911	-0.371809	-0.236168	-1.15564	1.46349	1.38309	0.411353	0.898732	0.631494	-0.184968	0.365503	0.82679	1.06196	1.12751	1.11363	0.218812	-0.79161	0.307465	-0.424644	-0.801869	-0.25736	-0.593224	-0.024695	0.824774	0.619523	1.28238	-0.0138605	0.0535273	1.53344	0.521939	1.24764	-0.795047
Arhgap35	+	-0.289736	-0.933236	0.175113	-0.1671	-0.980514	-0.139555	-0.0750347	-0.363138	-0.867693	0.230851	-1.01564	-0.860677	-1.93819	-1.59329	-1.60594	-1.44319	-0.338604	-0.638128	0.539023	0.0967178	0.0564985	0.667308	-0.535668	0.288399	0.304101	0.415046	0.664	0.804965	0.925736	1.11042	1.19509	1.08357	0.98976	-1.87585	0.374632	-0.270894	0.31656	1.77221	1.9917	1.93038
Arhgap42	+	-0.107759	-0.162486	0.448405	0.199914	0.668919	0.500047	0.315749	0.644277	0.444225	0.358933	0.597373	0.629448	0.979136	0.75223	0.632042	1.00437	1.31436	-2.96788	0.464834	-0.605224	-1.25266	0.496635	0.405249	-0.497118	-0.314241	-2.2067	-0.410358	-0.774992	-0.72667	-0.179068	-3.16709	0.39143	0.145301	0.237339	1.32858	0.212414	-1.07328	0.641191	0.414205	0.218924
Arhgap5	+	-0.688383	-0.698659	-0.425224	-0.214085	-0.245933	-0.0694776	-0.188326	-0.126411	-1.05242	-0.547287	-0.266708	-0.236577	-1.23824	-1.99048	-1.24978	-1.81502	-2.05622	-0.639329	0.86599	1.07052	1.00456	0.832738	0.866302	0.595783	0.56954	0.857437	0.824204	0.919892	0.849845	1.00402	0.558972	0.924747	0.869132	-1.13646	-1.23781	-0.68372	-0.279066	1.45536	1.81876	1.1978
Arhgdia	+	-0.998311	-1.00953	-0.914386	-0.996454	-1.03022	-0.977829	-0.751795	-0.701179	-0.851771	-0.936114	-0.830837	-0.86489	-1.24191	-1.3324	-1.22265	-1.16373	-1.00425	-0.952755	1.24489	1.21504	1.1199	1.28145	1.1207	0.869903	0.806455	0.791705	0.976601	0.946318	0.834781	1.11187	1.14342	0.983556	1.04464	-0.00242918	0.0110272	-0.681471	-0.464149	1.15036	1.17425	1.10219
Arhgdib	+	-1.49333	-1.50241	-1.72453	-1.48424	-1.34486	-1.43132	-0.823145	-0.78548	-0.773198	-0.954707	-1.08893	-1.10279	0.198116	-0.109312	-0.11301	-0.396411	0.16791	0.220798	0.671858	0.647513	0.51352	0.684516	0.611395	0.599396	0.630434	0.77031	-0.0253649	-0.0877194	-0.137394	0.222525	0.203109	0.515703	0.695517	0.63282	0.226167	0.0513114	0.368376	2.14608	2.27905	2.32172
Arhgef1	+	0.112879	-0.10208	0.0316771	0.0501232	0.0835149	-0.0305157	-0.188652	-0.0341873	-0.147824	-0.0940026	-0.0712854	0.014847	-1.60737	-1.61587	-1.72201	-1.98524	-1.6319	-1.51084	1.2078	1.23865	1.11743	1.11494	1.10445	0.970554	1.02336	0.946696	1.12178	1.11405	1.08354	1.14504	1.18276	0.755128	0.77488	-0.858371	-1.0004	-0.80592	-1.22403	-0.542036	-0.52672	-0.49484
Arhgef10	+	-0.426093	-0.543499	-0.169163	0.405353	-0.559979	-1.09827	-0.146477	-0.373213	-0.866267	-1.28251	-0.96491	-1.24847	0.137413	-2.55828	-0.728851	-1.55305	-0.578333	-1.31794	0.173478	0.136773	0.578872	0.168113	0.425329	0.870566	0.691408	0.748661	-0.153627	0.367494	-0.0287696	-0.0618309	-0.641457	0.6822	0.655133	1.21507	0.698599	-0.18898	2.19737	1.77424	1.79281	1.7711
Arhgef11	+	-0.545389	-0.158122	-0.860652	-0.434688	-1.16213	0.651015	-0.743458	0.738948	0.0793801	-1.86447	-1.57175	-1.35424	-0.871781	-0.485983	-0.855367	-0.681826	0.615031	-0.431907	-1.16076	-0.244547	1.28996	0.962872	-0.39409	0.228162	1.09023	-0.0813391	0.26594	0.671145	0.905918	0.374357	0.261407	-0.235434	-0.365735	-0.571883	0.545317	1.62647	-1.28514	1.88778	1.97407	2.19268
Arhgef12	+	-0.563778	-0.912675	-0.247042	-0.132922	-1.0896	-1.13545	-0.25493	-0.905995	-1.42519	-1.49186	-0.508318	-0.998596	-0.862412	-1.31261	-1.53296	-1.8707	0.4379	0.49167	0.584706	-0.180187	1.08325	1.12117	0.581353	1.78938	1.2999	1.3474	-0.546031	-0.752345	-0.701403	0.38537	0.0639033	1.28572	1.21682	1.14624	0.624613	1.45667	0.811405	0.285188	0.492974	0.919358
Arhgef16	+	-0.358951	-0.252395	0.319639	-0.781545	-0.605943	-0.103456	-0.489689	-1.1013	-0.727566	-0.406212	-1.10258	-0.661039	-1.09827	-0.804955	-0.268275	-0.159815	0.0888864	-0.0861869	1.70683	-0.0145296	1.8509	1.7398	1.94385	2.2632	2.0281	2.15477	-0.321652	-0.6825	-0.44089	-0.916509	-0.143373	-0.08381	-1.36526	0.315546	-0.183287	0.311999	0.000563781	-0.730826	-0.816582	-0.0166957
Arhgef17	+	-0.374689	-0.35433	-0.0393457	0.555528	-0.980597	-0.398073	0.473352	0.565265	0.196774	0.247503	-0.101975	-0.176738	1.09487	1.23811	1.18691	1.02166	1.67682	1.12174	-1.10174	-1.86343	-1.06693	-1.00925	-1.18392	-0.0830183	-0.374412	-0.406659	-1.90508	-0.336635	-1.67715	-0.851232	-1.11666	-1.11399	-0.519274	0.766659	1.3486	0.918343	1.41128	1.29644	0.87672	1.03856
Arhgef18	+	-0.0765644	0.165778	0.185322	0.181052	-0.287771	0.241484	-0.0815641	0.169193	-0.110473	0.0726985	-0.27139	0.0272751	-1.2851	-3.50954	-1.70637	-1.68068	-0.668711	-1.96629	0.846374	0.586418	0.772949	0.822507	0.913132	1.16235	1.28085	1.26279	0.540705	0.681593	0.983159	0.642066	0.755489	0.615126	0.784518	-1.03478	-0.794014	-0.706397	-0.69554	0.416497	0.321298	0.44456
Arhgef2	+	-0.626794	-0.157152	-0.817283	-1.08182	-1.04834	-1.00841	-0.279058	-0.41033	-0.464141	-0.381222	-0.450623	-0.256362	-0.475853	-0.79546	-2.11236	-1.312	-0.197785	-0.724218	0.81892	0.675224	0.459486	0.384772	0.415653	0.209841	0.0250047	-0.148047	-0.580855	-0.285484	-0.676759	0.00325496	-0.40823	1.24756	0.804063	0.813861	0.546812	0.13532	0.413061	2.68872	2.59321	2.46381
Arhgef25	+	-0.951861	-0.85159	-2.56703	-1.84725	-1.13815	-0.797717	-0.0653152	-0.379956	-1.32338	-0.266532	-0.936573	-0.0532026	-0.110447	0.177738	-0.435848	-0.545924	-1.08502	-1.74126	0.332823	0.533982	0.362693	0.402381	0.282843	0.189559	0.756525	0.735787	0.123587	-0.0865591	-0.102997	0.111635	0.213929	1.07977	0.976873	0.826606	0.940682	1.02901	0.513233	1.86224	1.89174	1.94299
Arhgef28	+	-0.878933	-0.0408215	-0.332907	-0.841866	-1.6143	-1.08352	-1.18181	-1.1188	-0.383523	-1.0142	-1.81837	-0.859236	0.369093	-0.00185183	-1.10085	-0.672219	-0.462668	-0.981205	0.552661	0.790948	0.786161	1.16442	0.663272	1.27911	1.29685	1.49646	-1.35527	0.195359	-0.235461	0.698207	-1.18202	-0.483104	0.875465	1.02675	0.198705	1.04208	1.25273	1.26685	1.12313	1.56469
Arhgef40	+	-0.801785	-1.05137	-1.51201	-0.880623	-0.974766	-0.510731	-0.767586	-0.72287	-0.54331	-0.908323	-0.664096	-0.956948	1.72016	1.65476	1.46029	1.4502	1.21108	1.31625	-0.288178	-0.251923	-0.176898	-0.822029	-0.359363	-0.56991	-0.985674	-0.548136	-0.383555	-0.202668	-0.519127	-0.514338	-1.1222	-0.349114	-0.176115	1.16837	0.816027	0.856047	1.32013	1.6187	1.52075	1.45088
Arhgef5	+	-0.00684564	0.16756	-0.205402	-0.339225	0.108792	0.579047	-0.99867	-0.354933	0.933602	0.357783	0.0729232	0.105318	-1.69251	-1.45768	-0.859055	-1.97522	-0.999361	-1.34746	0.884446	0.519116	1.14929	1.09555	1.21504	1.56438	1.55945	1.78952	0.371497	0.397109	0.204436	0.318012	0.192393	0.0831275	0.414003	0.998706	-1.15999	-1.83729	-2.07844	0.192941	-0.0899057	0.127954
Arhgef7	+	-0.293337	-0.378867	-0.299847	-0.283843	-0.342358	-0.267724	0.291799	0.0809506	0.211406	-0.194098	-0.267742	-0.0646884	-2.25183	-1.6099	-2.12354	-1.72487	-1.27375	-0.943604	1.16333	1.28019	1.27492	1.4147	1.32311	1.21486	1.34948	1.36117	0.297419	0.410755	0.315183	0.873208	0.843881	1.13662	1.14188	-0.800794	-0.457781	-1.05501	-0.0660751	-0.359108	-0.58292	-0.343174
Arid1a	+	1.57875	1.20442	1.45222	1.43522	0.783562	0.94479	0.449989	0.656839	0.85162	0.411134	0.496417	0.544665	0.961943	0.782098	-0.291793	-0.106949	1.21515	1.36883	-1.17057	-0.566763	-1.26296	-1.46714	-0.882524	0.22379	-0.244946	-0.0246877	-0.837289	-0.695128	-1.55311	-1.48937	-0.666836	-0.489732	-0.213883	0.78146	-0.157205	0.277058	0.525557	-2.21582	-1.57983	-1.02896
Arid1b	+	-0.559242	0.422049	-0.271747	0.367111	-0.85226	-0.0046284	-0.316238	-0.0384779	-0.870195	-0.666139	-0.751876	-0.45316	1.63222	1.70178	1.47561	1.78536	1.09568	1.14377	-1.73079	-1.51809	-0.281512	-1.59448	-1.22188	-0.22285	-0.330609	-0.864574	-0.755548	-0.715631	-1.00549	-0.351216	-1.18952	-0.311746	0.0494179	0.945788	0.781844	0.73011	1.10881	1.03455	0.92415	1.67965
Arid2	+	0.930095	1.4922	2.66104	1.90221	0.585324	0.956971	-0.147894	0.297548	-1.00219	-0.655292	-0.381207	-0.141831	-1.14605	-0.929707	-0.193391	-0.171898	1.20687	0.554278	-1.17657	-1.03216	0.583985	-0.15126	-0.103951	1.36643	0.913893	-0.121656	-0.642446	-0.590834	-0.451275	-0.334937	-0.404172	-0.169799	0.274912	0.159728	-0.548126	0.607002	0.841087	-2.70276	-1.49204	-0.642137
Arid3a	+	0.0247027	0.151727	0.163807	0.205203	0.304996	0.326593	-0.0776095	0.00492746	0.148993	0.178878	0.0700429	0.124994	-1.46984	-0.929906	-0.993732	-1.59433	-0.759468	-1.63247	0.970632	0.863699	1.29809	1.24371	1.33157	1.73379	1.7628	1.69133	0.509111	0.583494	0.493479	0.417584	0.582726	0.419525	0.252911	-0.889138	-1.87984	-0.650771	-0.872904	-1.03269	-1.17956	-1.89705
Arid4a	+	1.88276	1.57797	0.822332	0.783875	1.21811	1.62407	1.05808	1.07518	0.227115	0.60859	0.785742	0.710943	-0.177288	-0.249582	0.0953806	-1.13016	-0.0757058	1.26664	0.134881	-0.692885	0.0338744	-0.245018	-1.8009	-0.479112	-0.190225	-0.471192	-0.717235	0.216863	-0.0878993	0.158763	-0.378072	0.267049	0.0816606	-2.98772	-0.441965	-0.794167	-0.193265	-1.33846	-2.00642	-0.172622
Arid5b	+	-0.508473	-0.795529	-0.922168	0.0077823	-0.649489	-0.73929	-0.402084	0.231218	-0.0594649	-0.196061	-0.551445	-0.662698	1.48913	1.37543	0.68945	0.386809	1.41591	1.36362	-0.972408	-1.05246	-1.05709	-0.769963	-0.821269	-1.09135	-0.340494	-0.563449	-0.61696	-0.335427	-0.464584	-0.533221	-1.15144	-0.669501	-1.00061	1.89766	1.61268	2.11627	2.12989	0.762272	0.645791	0.803015
Arih1	+	-0.911322	-0.849293	-1.15686	-1.09957	-1.08958	-0.961168	-0.824939	-0.760037	-0.782137	-0.336761	-0.657438	-0.51762	-1.62048	-1.07498	-1.84608	-1.47631	-1.2082	-0.875948	1.1363	1.06343	0.994305	1.01388	1.1015	1.16397	1.24805	1.12845	0.783984	0.850659	0.771958	0.90614	0.913455	0.830228	0.844929	0.282416	-0.0677802	-0.0935926	-0.0961575	1.05629	1.05612	1.16021
Arih2	+	-0.58958	-0.790751	-0.887704	-0.2018	-0.811361	-0.752242	-0.582725	-0.411633	-1.02468	-0.78466	-1.06828	-0.885622	-0.576525	-1.8923	-1.92999	-1.70594	-1.23046	-1.44222	1.01958	1.08195	1.20465	1.13818	1.174	1.10665	1.00657	1.26667	0.739656	0.651315	0.774978	0.848759	0.999451	0.837957	0.883161	-0.124242	0.236775	0.113499	-0.2112	0.936421	0.963676	0.920007
Arl1	+	0.632764	0.361227	0.271036	0.785376	-0.109162	-0.00701335	0.737787	0.351203	0.169955	0.4204	0.560549	0.633832	-0.329094	-0.22488	-0.178026	-0.00338138	-0.0372855	0.0337531	0.798217	1.02619	0.766086	1.56491	1.30967	0.948528	0.746968	0.565696	-2.42861	-2.44885	-2.27511	-0.575374	-0.371966	1.39084	1.26088	-0.869512	-1.27204	-1.39023	-1.194	-0.527779	-0.761023	-0.332548
Arl14ep	+	1.12671	1.04002	0.489881	-0.972233	-1.67926	1.06604	1.13909	1.02859	1.25556	1.27209	1.31326	1.40924	0.795637	-1.59704	0.415005	-1.46159	-0.0822803	-0.120358	0.465062	0.628789	-0.870876	0.368106	-0.86691	0.369336	-1.28593	-0.990327	0.406311	0.438898	0.38525	-1.33955	0.395382	0.706763	-1.8683	-1.85853	-1.14341	-0.607246	0.0452502	0.174815	-0.214095	0.222838
Arl2	+	0.643761	0.65622	0.199153	0.0961744	0.813239	0.823405	0.617976	0.126902	0.806972	0.784587	0.806278	0.965241	-1.2177	-0.34254	-0.766354	-1.03107	-1.03458	-1.42804	1.03625	1.25454	0.769667	0.886111	0.704475	-0.416064	-0.606436	0.138047	0.581919	0.545352	0.226498	0.314512	0.53378	1.0644	0.918694	-2.13314	-2.76814	-1.48418	-2.06515	-0.379168	-0.33123	-0.310358
Arl2bp	+	-0.63721	-0.691702	-0.865019	-1.33465	-0.983272	-0.984952	-0.908569	-1.24191	-0.955964	-0.874992	-1.00726	-0.808416	-1.26371	-1.15286	-1.17262	-1.07977	-1.66938	-0.860538	0.969774	0.887414	1.03309	1.19232	0.98561	1.43666	1.36318	1.54382	0.579938	0.394429	0.519381	0.623595	0.529541	0.944033	1.04566	0.92738	0.905154	0.267173	-0.228606	0.754701	0.952124	0.866403
Arl3	+	0.278088	0.263955	-0.739938	-0.751382	-0.0943003	0.0117194	-0.0815517	-0.348841	0.158468	-0.0369255	-0.0626348	0.136422	-1.41235	-1.66875	-2.62942	-2.32119	-1.12266	-0.759064	1.08191	0.836991	0.833768	1.22807	0.867755	0.93469	0.462047	0.438441	1.37355	1.15595	1.02684	0.524467	0.561814	0.971313	0.859141	-0.616808	-0.0187605	-1.35045	-1.66772	0.570011	0.722045	0.385278
Arl5a	+	-0.780179	-1.47361	-1.56635	-1.36252	-2.56673	0.610781	1.10567	1.07716	-1.88701	1.23538	1.24508	0.936472	0.92619	0.521239	0.34275	-0.205543	-0.185749	-1.58648	0.339168	0.513706	0.27292	0.167953	0.403561	-0.479739	-0.566587	-0.414471	-1.67248	0.13139	0.194618	-1.43417	0.486834	0.56338	0.0870527	0.49862	0.073472	0.693942	0.671154	0.921817	1.05737	1.10394
Arl5b	+	1.05429	1.24915	0.899819	0.836298	0.968605	0.92363	1.04765	0.890752	0.722292	1.05782	1.27656	-1.57369	-0.796876	-1.43301	-2.04303	-1.10629	-0.493389	-2.0272	0.64765	0.443792	0.457453	0.501614	-0.00106857	0.220157	0.383635	-0.276911	0.374254	0.29545	-0.243144	-0.0241776	0.222657	0.810562	0.86071	-0.882065	-2.11732	-1.60868	-1.4028	0.0795703	0.0132693	-0.208002
Arl6	+	0.351322	-0.0511113	-0.401228	-0.0177261	-0.101928	0.158386	0.199276	-0.371238	-0.502308	0.214611	-0.434629	-0.412813	-0.866337	-1.28412	-0.713734	-2.46402	-2.65198	-1.70885	0.564024	0.53849	0.640497	0.346655	0.822866	1.02626	1.63535	1.27568	-0.720567	-1.54684	-0.841089	0.302553	-0.479596	1.29494	1.29226	0.705101	1.45991	0.672796	0.20793	0.770139	0.283344	0.807731
Arl6ip1	+	0.581893	0.514028	0.541945	0.562249	0.382476	0.317206	0.986799	0.804161	0.456647	0.669888	1.11324	0.824272	1.57755	1.23957	1.79002	1.65327	1.06292	0.995709	-0.960307	-1.26032	-0.897087	-0.739849	-1.05417	-1.06969	-1.34147	-0.734859	-1.32143	-1.3103	-1.82667	-1.17682	-0.969934	0.00724688	-0.614713	0.477415	0.0152002	0.617243	0.663366	-0.887293	-0.977667	-0.711751
Arl6ip4	+	-2.35883	-0.91466	-1.31623	-0.948443	-1.58651	-3.501	-0.713265	-0.225236	-0.298815	0.176051	-1.79678	0.518809	0.123643	0.260015	0.509062	0.144907	-0.18323	0.625483	0.238668	-0.110558	0.505018	0.398316	0.850367	0.397904	0.680145	1.14572	0.494477	0.548607	1.50947	0.563733	-0.175978	0.483983	0.741554	0.922264	0.257591	-0.508112	0.59597	0.685146	0.21977	1.04097
Arl6ip5	+	0.416025	0.312552	1.45408	0.843012	0.587761	0.5337	1.46544	1.87714	0.579606	0.333129	0.802763	0.823665	-1.10265	0.131094	1.76239	2.13731	1.15032	0.736617	-0.995439	-0.992379	-1.21934	-1.15046	-1.21069	-1.13248	-1.0704	-1.58183	0.00852862	-0.00550947	-0.0617237	-0.687195	-0.734886	-1.08754	-1.08509	0.335659	0.269023	-0.328461	0.370631	-0.749401	-0.914782	-0.820176
Arl6ip6	+	0.717167	0.620885	0.715037	0.89944	0.361927	0.326648	0.588172	0.560337	-0.0394053	0.481639	0.451121	0.530092	1.06944	0.737667	0.897559	0.783331	1.06333	0.806098	-0.879508	-1.10154	-2.03591	-1.67795	-1.35899	-0.426163	-1.72666	-1.2662	-0.939849	-1.8867	-1.41441	-1.49737	-0.821892	0.151214	0.105421	1.73463	0.626234	0.883815	0.811135	0.462393	0.220112	0.467686
Arl8a	+	-0.0318731	0.518191	0.288544	0.283233	-0.647017	0.200479	0.163975	0.0801215	0.37669	0.0286041	-0.31679	0.994234	1.99019	1.40392	1.4621	1.83756	1.85183	1.43037	-0.699899	-0.743384	-0.766683	-0.881945	-0.545008	-0.421886	-0.422697	-0.762167	-0.996421	-1.97092	-2.08007	-1.30842	-1.29532	-0.417408	-0.612612	1.28746	0.501783	0.887455	0.298375	-0.183102	-0.464619	-0.316867
Arl8b	+	0.43145	0.817728	0.142983	0.0230363	0.160124	0.274575	0.368657	-0.42615	0.80746	0.299265	0.179757	0.0704821	1.15014	1.27627	1.28736	0.865402	1.33168	1.46426	0.135336	-0.494211	-0.656619	0.127331	-0.111556	0.00283201	-0.0143758	-0.671195	-2.93661	-2.79922	-1.98285	-1.29194	-0.580169	-0.545855	-0.0879277	0.883283	0.750968	0.749002	0.829718	-0.805546	-0.576987	-0.447879
Armc1	+	0.737556	0.589558	0.829576	0.803709	1.2045	1.03148	1.07628	0.948221	0.570425	0.389969	0.248883	0.510171	-1.66223	-0.877597	-0.710146	-0.811551	-0.879012	-1.02549	0.783146	0.739704	0.460418	0.995551	0.814678	-0.033432	0.108295	-0.564204	-0.0358243	-1.06784	-0.879796	0.0257835	0.582773	1.29574	0.950287	-3.12905	1.05917	-1.57131	-0.87804	-0.495587	-1.13318	-1.00159
Armc10	+	0.784755	0.516362	1.29849	1.16736	0.996631	0.930696	1.24611	1.08229	0.131911	0.91924	0.772895	0.611233	0.330363	0.629311	0.0646244	0.200813	-0.897074	-0.564223	-0.0965017	-0.439308	-0.0996047	-0.365673	0.131491	-1.31081	-1.13981	-0.686355	0.773875	1.03206	1.42717	0.456148	0.473405	-0.289753	-0.118853	-2.87259	-1.6936	-1.00171	-0.224309	-2.1569	-1.13182	-0.888353
Armc6	+	0.398444	0.29782	0.422331	0.359062	0.509301	0.403108	0.389641	0.439056	0.246178	0.267367	0.363476	0.490564	0.272763	-2.22343	-2.55531	-3.52333	-2.18304	-0.697485	0.743435	0.691134	0.439563	0.365647	0.467503	0.104893	0.0626428	0.0579195	1.07706	1.04972	1.00698	0.781905	0.760495	0.586027	0.602947	-0.26331	-0.37302	-0.848267	-0.371221	-0.209764	-0.203646	-0.205159
Armc8	+	-0.618621	0.192041	0.564139	0.577881	0.309545	-0.0617461	-0.805811	-0.212691	0.293029	-0.30775	-0.33872	-0.451948	-1.87071	-1.89577	-1.60379	-2.43529	-0.862619	-0.39894	-0.13298	-0.395928	-0.0547804	-0.97752	-1.01634	0.743983	0.510115	0.78438	-0.128799	-0.252861	-0.421605	0.0603482	0.571	0.849409	1.18046	0.429577	1.33534	1.22102	0.0928674	1.50289	2.0463	1.98087
Armcx1	+	0.323151	-0.330034	-0.215881	-1.85578	-1.57007	1.10231	-0.0812882	0.602002	-0.238396	0.151317	-0.747346	0.381113	1.65742	1.30877	1.08674	0.887501	1.29927	1.60182	0.0912259	-0.902986	-0.868086	0.349553	0.34165	-0.195859	-1.41891	0.319343	-0.298539	-1.12963	-1.83945	0.57492	-1.42851	-0.0628245	-0.155182	0.283199	1.9833	-0.030588	1.50892	-0.401385	-1.18554	-0.897241
Armcx2	+	-0.188881	-0.111523	-0.716167	0.137397	-0.681445	1.1984	0.0171615	0.208133	-0.500355	-0.0141956	0.0258133	0.561679	0.631	0.661505	0.410374	0.496081	2.32537	1.31486	0.353518	-0.812974	-0.133962	-0.633762	0.301962	-2.28471	-2.4855	-1.82639	-0.503693	-0.181714	-0.0236351	-0.795173	-0.538534	0.575565	0.766412	1.21513	1.14717	-1.90236	-0.450076	1.34403	0.130651	0.962831
Armcx3	+	0.604656	0.668551	-1.50944	0.236306	0.188224	0.288663	0.362307	0.5329	0.668968	0.870375	0.276834	0.0435979	0.981636	1.06432	0.587938	0.439884	-0.989949	0.5439	0.447247	0.222015	-1.12163	0.352272	0.257868	0.631115	-1.40351	0.667784	-1.92451	0.257286	-2.53951	-2.28962	-1.40196	0.504101	-1.79759	1.00756	0.908093	0.841825	0.840497	-1.07541	0.344257	0.412159
Armcx4	+	0.569442	2.45243	-0.858653	0.233255	-0.119435	-0.0494928	1.13099	-0.261652	-0.183015	-0.114783	-1.27599	-0.577795	0.270429	0.641114	-0.483889	-0.103431	0.832307	0.812172	-1.47973	0.196789	-0.466142	-0.899543	0.647023	0.199991	1.04514	0.994002	0.583909	-1.96054	-2.53447	0.436252	-0.612447	-1.22599	-1.51688	-0.322475	1.39212	0.420685	1.79076	0.0658493	-0.115927	0.447634
Armcx5	+	-0.524598	-0.454825	-0.383026	-0.621852	-0.600236	-0.311871	-0.0902758	-0.349948	-0.265306	-0.373787	-0.239262	-0.477272	-0.781379	-1.29157	-0.665547	-2.70147	-0.615597	-1.94781	1.30083	1.03507	0.673788	0.925648	0.917195	0.783637	0.697284	0.46716	1.01359	1.04499	0.99554	0.807835	0.901984	0.646246	0.722785	-2.77156	0.0821395	-0.382112	-0.204618	0.955812	1.04247	1.03992
Armh3	+	-0.584499	-0.14223	-1.74088	-0.957635	-0.976064	-1.46256	-0.059435	0.285941	-1.18848	-1.80894	-1.65903	-0.774283	-1.37079	-0.287961	-0.762975	-0.0283333	-0.30441	-0.211248	0.164249	0.626196	0.811996	0.679276	0.806933	1.48283	1.49732	1.78697	-1.53268	-0.63641	-0.0680449	0.206229	0.425164	0.866255	1.26518	1.01671	0.204245	0.365	1.30768	0.626327	1.22723	0.905151
Armt1	+	-0.26557	-0.428416	-0.416423	-0.447613	-0.485257	-0.0461662	-0.0780909	-0.6948	-0.880627	-1.08976	-1.04854	-0.501265	-1.04404	-2.64031	-3.25276	0.0509179	0.0766208	-0.0649551	0.773407	0.79486	0.641012	0.899581	0.82788	0.968631	1.00839	0.849937	0.878091	0.838347	0.93527	1.01494	0.868596	0.932005	0.869694	-0.262349	-0.00605806	-0.626227	-1.32056	0.882073	0.660709	0.828818
Arnt	+	-2.08523	-0.554793	0.54699	-1.31555	-1.38076	-1.5172	-1.06864	-0.323468	-1.22441	-0.460965	-0.334966	-0.372523	1.84604	0.332179	-0.50764	-2.00542	0.567928	-1.22656	0.685169	0.985976	0.143811	0.550817	-0.865872	0.058186	-0.198094	0.926941	0.774388	0.913279	1.10462	0.616064	0.782793	0.610638	0.542059	-0.738272	-0.309525	1.89255	-0.408662	1.27612	0.92717	0.81483
Arpc1a	+	-0.581228	-0.467702	-0.378796	-0.588597	-0.794257	-0.66776	-0.380378	-0.574696	-0.369497	-0.354744	-0.397866	-0.513958	-1.07998	-0.884912	-0.983963	-1.05227	-1.39201	-1.40765	0.988754	1.07474	1.53694	1.57024	1.49935	1.97946	2.00536	1.83241	0.53746	0.493995	0.406093	0.710711	0.745505	0.864769	0.958433	-0.764802	-0.904855	-1.21941	-0.918694	-0.267392	-0.162159	-0.0966516
Arpc1b	+	-1.34277	-1.35929	-1.00308	-1.11091	-1.36989	-1.64144	-0.62518	-0.702861	-0.691879	-0.90074	-0.792148	-1.06071	-0.555029	-0.406579	-0.372931	-0.45809	0.0374807	0.0601419	0.418335	0.478941	0.56114	0.513683	0.421928	0.427615	0.286358	0.372383	-0.0852481	-0.28087	-0.456759	-0.0744883	0.087998	0.151807	0.0426334	1.39567	1.34499	0.917642	0.666747	2.27528	2.42719	2.40292
Arpc2	+	-1.33584	-1.10939	-1.31554	-1.18182	-1.12712	-1.19341	-0.514243	-0.633046	-1.06183	-0.67627	-0.836053	-0.762434	-0.709507	-0.793685	-0.413424	-0.448342	-0.611324	-0.744928	1.18439	1.21346	1.23134	1.47363	1.32195	0.843592	0.856269	0.826427	0.0199606	0.0612923	-0.0373837	0.584328	0.699409	0.65206	0.601004	-0.400888	-0.437656	-0.336028	-0.681818	1.89652	2.04811	1.84826
Arpc3	+	-1.08411	-1.29493	-1.00482	-0.841409	-0.780091	-1.22162	-0.0266855	0.0279909	-0.775168	-0.513409	0.184123	0.460828	-1.19014	-0.845235	-0.223912	-0.189517	-0.439104	-0.507084	0.645633	0.914387	0.358399	0.462283	0.267406	-0.181366	-0.186224	-0.21683	0.829266	0.729191	0.958026	0.417762	0.621189	-0.594983	-0.500983	1.59768	1.4798	-1.85315	-1.62571	2.1813	2.12769	1.83353
Arpc4	+	-1.06783	-0.914521	-1.67235	-1.52883	-0.60328	-0.86874	-0.113551	0.00407031	-0.0351026	0.0742757	-0.0104115	0.38929	-0.336351	-0.479227	-0.65637	-0.198168	-1.56915	-1.41278	1.25922	1.82602	0.739071	0.926288	0.809668	0.0364643	0.0782785	0.0908591	1.45972	1.55242	1.74796	0.474452	0.832998	0.228956	0.255932	-1.031	-1.19253	-1.14426	-1.39548	1.15923	1.18718	1.09757
Arpc5	+	-1.10514	-1.36559	-1.48372	-1.55466	-0.732734	-0.885841	-0.556563	-0.506271	-0.453083	-0.395071	0.137309	0.0939319	-0.716969	-1.3197	-0.844412	-0.739648	-1.33267	-1.33753	1.37239	1.06446	0.667731	0.748736	0.656219	0.648645	0.40935	0.310198	1.56764	1.41002	0.946633	0.5995	0.759969	-0.308431	-0.458451	0.421872	0.12612	-0.42873	-0.707973	1.76535	1.77328	1.75383
Arpc5l	+	-0.992584	-1.82269	-0.809929	-0.600467	-1.50906	-1.08706	-0.567234	-0.93962	-1.28964	-0.74819	-0.399015	-0.739344	-0.451446	-0.601821	-0.872571	-0.6439	0.435616	0.0497276	0.00380949	0.0669889	-0.0592376	-0.41957	-0.0200402	1.09697	0.652873	1.37254	0.147422	0.0577985	-0.00558517	-0.369499	0.0537857	-0.488627	-0.0549298	2.1043	1.88464	1.3784	1.76692	2.00171	1.44565	0.972911
Arpin	+	-0.156688	-2.37803	-1.66886	-0.353673	0.0537586	-1.52249	-0.0404765	-0.198397	0.176359	-1.21277	-1.05213	-2.31482	-0.368884	-0.777637	-0.308099	-1.93706	-1.5573	-0.471902	0.846371	0.788694	0.842898	0.836828	0.897998	0.724702	0.77662	0.850629	0.787249	0.996718	0.908256	0.923631	0.874089	0.943295	0.789952	0.398784	0.125944	0.294864	0.412981	0.644857	0.652279	0.771444
Arpp19	+	-0.106254	-0.711946	-0.172083	0.105912	-0.394006	-0.570435	-0.154997	-0.0848541	-0.872533	-0.74703	-0.557302	-0.426937	-2.86549	-2.36511	-1.37551	-1.20093	-0.289647	-0.268051	0.734317	0.705285	0.131551	0.32776	0.516941	0.0765729	0.218171	0.363584	0.517725	0.761684	0.498408	0.946766	0.896891	0.421623	0.265075	1.09026	0.985753	-1.15601	-0.745748	1.95646	1.79833	1.7458
Arrb1	+	-0.0106728	0.147478	0.059678	0.0887445	-0.106897	0.0172071	-0.0772295	-0.0725355	-0.221209	-0.195525	-0.00106711	0.0757847	-1.6206	-1.15384	-1.94777	-1.84254	-2.00916	-1.26222	0.857664	0.660496	1.05458	1.1525	1.30458	1.62386	1.63286	1.64334	0.704289	0.689476	0.718254	1.02596	1.08158	0.672173	0.626156	-0.824565	-1.08319	-0.741917	-0.780193	-0.569355	-0.646145	-0.670039
Arrb2	+	0.547784	0.290378	0.8355	0.953013	0.656763	0.247415	0.373269	0.339285	0.0440803	-0.292672	-0.439307	0.0312867	-1.95143	-1.62174	-1.94628	-0.998638	-1.45666	-1.41268	0.698711	0.53162	0.679015	0.542785	0.768046	0.50556	0.76365	0.560131	1.14037	1.19641	1.07986	1.14152	1.03325	0.716396	0.656489	-1.74699	-1.90394	-1.70152	-0.5437	-0.0316608	-0.495306	0.209938
Arrdc1	+	-1.4096	0.1801	-0.0450758	0.663733	-0.385083	-0.289854	-1.32029	-0.340006	-1.26193	-1.2098	-1.40578	-1.25202	-1.26121	-0.942748	0.40686	-2.11729	0.476193	-0.063736	0.386601	0.765256	-0.197317	0.749015	0.894503	-0.188787	0.958663	0.663639	0.822934	0.332669	0.822142	1.16288	0.910387	0.711141	0.789694	0.859443	0.917863	-1.08894	2.04278	1.40606	-1.76818	-0.374916
Arsa	+	-0.0332163	-0.0535496	-0.125783	0.430042	-0.22637	-0.420531	0.874484	1.20601	1.59374	1.21813	1.18426	0.829396	0.339982	1.0995	1.34424	1.36853	0.257785	-0.823443	-0.564673	-0.228974	-0.872869	-1.06012	-0.588803	-1.00707	-0.984335	-0.929531	-1.63155	-1.50725	-1.23643	-1.79592	-2.2867	0.310647	0.388563	1.40843	0.525546	-0.369624	0.568726	0.407108	0.607186	0.784445
Arsb	+	-0.0277034	-0.00531571	-0.627853	-0.0557431	-0.514583	-0.409935	0.72698	0.546436	0.523439	0.791601	0.845879	0.618608	1.43345	1.02903	0.8989	1.62547	1.13065	1.13922	-1.44208	-1.30171	-1.30706	-1.30402	-1.39738	-0.589047	-1.18465	-1.14403	-0.0571411	0.279631	-0.215485	-1.06309	-1.87813	-0.0952663	-0.0682396	1.48935	2.14887	0.0812594	0.941201	0.110088	-1.02516	-0.646453
Arv1	+	1.02479	1.17541	1.25958	1.69976	1.5219	1.10815	0.532464	0.981997	1.45702	1.54111	0.401063	1.10115	0.288258	0.706343	-0.0899543	0.570247	-0.208149	0.415662	-0.303593	-0.592786	-1.15542	-0.530457	-0.452902	-1.42367	-0.931729	-1.18314	-0.65954	-1.10576	-0.991966	-0.850542	-1.11008	0.580483	0.408334	-0.396798	-1.28663	0.500181	0.353139	-1.46325	-1.70029	-1.19038
Arvcf	+	0.347241	-0.0309766	0.551574	0.753284	-0.165823	0.408706	0.820254	0.528681	-0.474786	-0.269409	0.0192737	-0.0365759	1.56263	0.924406	1.57101	1.69082	1.24278	1.68183	-0.760072	0.00215106	-1.77019	0.108202	-0.0167064	-0.358048	-0.238701	-0.981723	-0.769869	-0.942842	-0.580177	-0.945007	-0.882329	0.41401	0.665557	-2.31394	0.59501	-1.05622	1.70185	-1.57932	-1.53582	0.11926
Asah1	+	0.197907	-0.0827362	-0.118403	-0.02992	0.10388	-0.0554767	0.488229	0.407872	0.27951	0.240466	0.383172	0.343136	1.44856	1.50451	1.83597	1.83604	1.27473	1.22802	-0.741779	-0.667676	-0.57333	-0.632642	-0.862289	-0.990834	-0.998572	-0.867552	-1.75687	-1.93559	-1.91536	-1.38801	-1.39445	-0.496828	-0.60316	0.709348	0.680716	1.04424	1.09544	0.139159	0.584487	0.286087
Asah2	+	-0.440748	-0.165122	1.31843	-0.392781	-1.32612	1.61243	-1.13022	-1.04332	-0.101462	-0.661213	-1.29804	-0.209009	-0.928454	1.51297	1.26273	1.15427	0.985524	1.49651	-1.15975	0.0691647	1.39309	-0.900427	-0.170645	-0.715752	-0.762855	1.12536	-0.0848692	-0.0864418	-0.514778	-1.36938	-0.332669	-0.877308	-0.452033	1.28364	-0.324657	1.43779	1.43825	1.17715	-1.0449	-0.774352
Asap1	+	-1.48896	-1.92678	-1.82716	-1.90362	-1.27689	-0.869965	-1.18042	-0.963065	-0.81959	-1.26905	-0.599986	-0.591229	-0.596612	-0.352149	-0.794649	-0.996275	-0.381866	0.00868692	0.870149	1.10738	1.01652	1.05817	1.06874	0.256357	1.21467	1.19121	0.69865	0.950968	0.800808	0.691438	0.345102	0.881171	0.842596	0.45372	0.573963	1.03723	0.37426	1.06135	0.538556	0.796563
Asap2	+	-0.428418	-0.586702	-3.71191	-0.574014	-0.111193	0.105868	-0.592468	-0.214351	-0.730298	-0.100757	-0.629196	-0.785853	-2.78453	0.273904	0.280654	0.608778	0.838102	0.506188	0.827534	0.572246	0.925669	0.994013	0.596026	0.798752	0.896745	0.959194	0.519359	0.46797	0.570622	0.666064	0.389374	0.811831	0.212509	0.618052	0.619474	-2.05079	-0.0897848	-0.36209	-0.543295	0.236723
Asb6	+	0.107551	0.271254	0.259546	0.0812379	0.182826	0.403333	0.368123	0.34726	-0.160616	0.511545	0.0467104	0.062093	-1.85924	-1.73149	-1.84731	-2.05829	-1.94703	-2.14066	0.840711	0.886236	0.532233	0.583189	0.691277	0.609763	0.134577	0.535536	0.768861	0.94644	1.02368	0.656982	0.790362	0.609068	0.677263	0.412108	-2.6806	-0.0713141	0.0581235	0.660211	0.0946812	0.343771
Ascc1	+	0.0998211	-0.505527	0.483021	0.470484	0.133753	-0.238619	0.664759	0.258791	-0.821412	-0.365334	-0.102077	0.19644	-1.68029	-0.99455	-1.11817	-1.11719	-0.432371	-1.5201	1.35828	1.15337	1.21054	1.1347	1.41009	0.688587	0.885057	0.291901	-0.00501188	0.122308	-0.437271	1.0825	1.05594	1.40438	1.30606	-1.22569	-2.57706	-0.578755	-2.01928	0.047866	0.104071	0.176004
Ascc2	+	-0.572694	-0.54582	-0.483174	-0.42261	-1.23437	-0.898531	-0.781637	-1.03344	-0.82917	-1.30457	-2.02852	-1.86003	-0.634558	-0.293239	-1.68444	-1.70721	-0.328565	-0.363697	0.705318	0.526034	1.01271	0.540149	0.881514	1.59381	1.63367	1.39014	0.0421603	0.279869	0.134197	0.763556	0.365278	0.769446	0.468611	0.979946	1.17113	1.37438	0.929602	0.544732	0.655205	0.244816
Ascc3	+	-0.100467	-0.355442	-0.514297	-0.176848	-0.93518	-0.538788	-0.378888	-0.291446	-0.849214	-0.770334	-0.532917	-0.620587	-1.3982	-1.48971	-1.72129	-1.61794	-1.99265	-2.27556	0.732088	0.647564	1.08315	0.834993	0.846668	1.28676	1.79688	1.68664	0.0901593	0.32694	0.180084	0.738896	0.388166	0.644821	0.980152	0.505807	0.457585	0.793671	0.724644	0.54827	0.823614	0.442208
Asf1a	+	-0.456415	0.05129	-1.71309	-2.44042	0.728515	0.332569	-0.821699	-0.916996	-0.197861	-0.0960725	0.865085	0.0801549	0.827129	0.280274	-1.0365	-2.4628	-0.201458	0.181171	1.2868	1.08928	0.0467697	-0.19432	0.450714	0.977639	1.05504	1.21917	-1.22953	-1.39297	-0.994632	-0.417274	-0.265785	1.37592	1.25977	-0.00951893	1.92064	0.329865	0.166988	0.0925263	0.498808	-0.268768
Ash1l	+	1.18737	1.30341	0.846557	0.988825	1.08795	0.782738	0.519861	0.655626	0.229367	0.372561	0.325927	0.470514	0.724888	0.641927	0.575697	0.736518	0.160271	0.576286	-1.12357	-0.762531	-0.00637246	-0.159415	0.73355	0.06293	-0.995575	0.635386	-1.31169	-1.05784	-2.0707	0.984172	-2.37046	0.439522	-0.725093	0.136336	-1.5013	0.101894	-0.191544	-0.904056	-2.69772	0.597787
Ash2l	+	1.12182	1.14167	1.35694	1.09186	0.887318	0.640654	0.275438	0.726784	0.252712	-0.263769	-0.235426	0.0890887	-1.01013	-1.31804	-0.739514	-1.09576	-0.0550403	-0.167328	0.060923	0.214264	0.221758	0.246686	0.415686	0.0746303	-0.203363	0.535775	0.728116	0.847624	0.865405	0.905873	1.16284	1.16738	1.13523	-2.2475	-1.76158	-1.43239	-0.700406	-1.82683	-1.0481	-2.0613
Asl	+	-0.863508	-0.621036	-0.658612	-0.577439	-0.949695	-0.612308	-0.604714	-0.68468	-0.666275	-0.610069	-0.75227	-0.622724	-1.50069	-1.7039	-1.23972	-1.16645	-1.01476	-0.931331	1.31582	1.30352	1.35815	1.34631	1.446	1.55556	1.39614	1.62899	0.914072	0.826517	0.639972	0.976598	1.09292	0.938929	0.931694	-0.461975	-0.593618	-0.529606	-0.572611	0.0394659	0.257942	-0.0306139
Asns	+	-0.586514	-0.616264	-0.579015	-0.63121	-0.558973	-0.465748	-0.289939	-0.348988	-0.512205	-0.536091	-0.423834	-0.454315	-1.71005	-1.86525	-1.35164	-1.71813	-1.67249	-1.67284	1.21368	1.19301	1.20894	1.12062	1.12282	1.02815	1.14592	0.822441	0.939344	0.866263	0.763575	1.08604	0.994248	1.21791	1.19876	-0.179586	-0.125686	-0.52557	-0.7768	0.560121	0.577773	0.541526
Asph	+	0.607864	0.700401	0.596761	0.62619	0.791877	0.794868	1.2117	1.13316	1.06488	1.04012	1.15737	1.14228	1.08731	1.15869	1.43629	1.38344	1.02619	1.06037	-0.348986	-0.396226	-0.811157	-0.755079	-0.803647	-1.45395	-1.54379	-1.47868	-0.809826	-0.860228	-0.831862	-1.02048	-0.951465	-0.161956	-0.245784	-0.679525	-0.646476	-0.0464744	0.0577039	-1.54456	-1.37559	-1.31173
Aspm	+	0.26826	-0.576919	-0.861906	0.116616	-1.72007	-0.58488	0.21301	0.742264	0.427442	-0.37008	-0.49156	-1.58541	0.90358	0.63417	-0.596212	-0.0474024	-1.73806	0.784251	-0.0429092	-1.36682	0.104519	-0.714298	-1.13641	-0.48299	-2.11791	-1.64348	0.492655	1.4113	1.10991	1.06399	0.326123	0.904268	-0.706977	1.40577	0.644402	0.7479	0.638017	0.902703	1.58582	1.35731
Aspscr1	+	-0.953764	-0.560244	-1.17565	-2.92273	-1.05633	-0.978222	-0.422061	-0.242456	-0.31235	-0.387349	-0.592596	-1.15857	-1.21472	-0.670953	-0.0398664	-0.162504	-0.0494597	-0.29541	0.711783	0.652901	0.74579	1.24851	0.986699	0.614034	0.55549	0.655177	0.538785	0.684334	0.940651	0.32391	0.479801	1.08289	0.882563	-0.301611	-1.35581	-0.838713	-0.69664	1.82596	1.55934	1.8994
Asrgl1	+	-0.519655	-0.350048	-0.738002	-0.436868	-0.375824	-0.267808	-0.868816	-1.10067	-0.899413	-0.310962	-0.42406	-0.454734	-2.26179	-1.17098	-2.13461	-1.10623	-0.670873	-2.12336	1.04634	0.97338	0.729791	0.822204	0.844581	0.640383	1.10223	0.769429	1.00047	1.00691	1.01174	0.99273	1.04618	1.13654	1.17178	0.233399	0.146127	-0.561272	-0.544456	0.542517	0.963255	1.14042
Ass1	+	0.852419	0.650933	0.536481	0.404164	0.625734	0.620538	1.34101	1.46095	1.48251	1.44011	1.40495	1.47136	-0.836073	-0.801772	-0.634792	-0.660417	-1.22687	-1.21842	0.180105	0.244953	-0.454203	-0.257227	-0.319922	-0.967959	-0.865313	-0.790508	-1.03443	-1.07442	-1.28351	-0.947945	-0.87887	-0.163492	-0.409833	-0.0841962	-0.0633525	-1.32742	-1.15216	1.48977	1.60621	1.64091
Atad1	+	1.24437	1.32602	0.971012	0.858028	1.23584	1.19139	1.51694	1.50914	1.12038	1.19176	1.3697	1.29493	-0.276203	-0.35187	0.114763	0.246755	-0.54022	-0.242229	-0.227817	-0.0453863	-0.466206	-0.643017	-0.291093	-0.837958	-0.787915	-1.04553	0.507583	0.307362	0.230906	-0.0201512	-0.253141	0.0451088	0.159052	-2.00644	-1.53864	-1.40069	-1.42634	-1.52897	-1.06555	-1.44568
Atad2	+	0.76658	0.757208	0.935947	0.771072	0.786235	0.665912	0.37848	0.473859	0.497268	0.454043	0.364877	0.379599	0.823106	0.136106	0.0220166	-0.398081	0.956513	0.847784	-0.125832	-0.633179	-0.284886	-0.898761	-0.312516	-3.47593	-0.0472549	-0.130709	-0.388453	-0.231551	-0.275168	-0.0818811	-0.393229	0.30266	0.0500522	-0.273099	-0.62755	0.862237	-0.179002	0.977586	0.455877	-3.90793
Atad2b	+	0.841855	1.2519	0.124107	0.843941	1.13887	1.1187	0.820416	0.0719203	0.951846	0.255516	0.105184	0.351451	-0.812001	-0.505155	-0.25843	0.568066	-1.30407	-0.684269	-0.16876	-0.478577	-1.00328	-0.15255	-0.389065	0.975515	0.332911	0.696384	0.71889	1.17853	1.62203	0.369951	0.411452	-0.194313	0.339351	0.374357	-1.31783	-0.823898	-1.34485	-0.654571	-1.98234	-3.38919
Atad3	+	1.39814	1.35413	1.20837	1.18214	1.14493	1.08462	1.11132	1.08966	1.02198	1.01007	1.04821	1.1156	-0.792234	-0.720344	-0.684746	-0.644664	-0.791868	-0.700267	0.294355	0.270726	0.139346	0.136311	0.13234	-0.0945443	-0.138152	-0.0616301	0.00875434	0.0545376	0.108989	-0.0299192	0.0939094	0.568515	0.513798	-1.55514	-1.448	-1.4724	-1.33102	-1.83224	-1.79359	-1.99998
Atad5	+	1.2992	1.55386	0.684941	1.10967	0.963016	1.02221	1.55294	1.08106	0.515469	0.324705	0.715457	0.895977	0.985258	0.565305	-0.043112	0.0163331	-0.64258	-2.44111	-1.46504	-0.6851	-1.46772	-1.28163	-1.22248	-0.94873	-1.18173	-0.990467	-0.0694144	0.108413	-1.08153	0.902973	-0.0235729	0.32954	-0.0587919	0.76639	-1.539	0.886367	-1.07274	0.231144	-0.203199	-0.0922863
Ate1	+	-0.99639	-1.04254	-0.410069	-0.824667	-1.61087	-1.15297	-0.619495	-0.830901	-0.867006	-0.676149	-0.952541	-0.486119	-1.76956	-1.37511	-0.986936	-0.954735	-1.41072	-1.33704	0.750665	0.835294	0.747568	0.859113	0.742605	1.39001	1.26016	1.18925	0.534884	0.368036	0.532007	0.637544	0.594178	0.805339	0.947028	0.623866	0.575271	0.238738	0.455218	1.26661	1.61791	1.33252
Atf1	+	-0.725959	0.0808822	-0.2195	-0.599735	0.146501	0.0328118	-0.412351	-0.383109	0.330881	-0.660567	-1.70151	-1.70212	-2.57191	-0.655713	0.37475	0.381967	0.506981	0.267767	-0.713784	-0.264148	-0.626094	-1.02064	-0.0205942	0.406465	-2.58413	0.175844	0.941124	0.669565	1.06179	0.648661	0.742406	-0.308566	-0.278898	1.53936	1.30892	1.38924	1.555	0.897071	1.06401	0.927326
Atf3	+	-0.203048	-0.318975	0.0406775	-0.0420427	0.223905	0.458282	-1.76798	-1.2058	-1.52601	-1.95238	-1.95793	-1.69372	1.03333	0.368539	-0.045148	0.512488	-0.581196	1.61503	-0.16438	0.654641	0.157746	0.34597	0.901135	0.00971603	-0.383912	1.2581	-1.05641	-1.49975	-1.3036	-0.129458	-0.0184689	0.98527	0.847921	1.14565	1.02197	0.453219	0.785892	0.484977	1.57871	0.967041
Atf7ip	+	-1.00079	-1.25679	-0.891685	-0.742221	-1.88478	-1.58703	-0.440403	-0.946256	-1.03494	0.0617518	-1.14331	-1.2206	0.114333	0.443953	-1.30187	-2.26892	0.0600443	1.20509	0.0156341	0.0123775	-0.306631	0.172236	0.513	0.963074	1.12174	1.30571	0.946141	0.632912	1.54027	0.880583	1.08914	0.209133	0.8324	0.521978	-0.188126	0.862068	1.25113	1.04807	-0.531689	0.943267
Atg101	+	0.634991	0.702448	0.970839	1.08791	1.06342	1.01103	0.593334	0.542072	0.346758	0.754435	0.450124	0.666038	-2.68098	-0.537692	-1.95837	-0.991524	-1.48356	-1.57139	0.78134	0.604728	0.921376	0.770411	0.879659	0.454103	0.710487	0.0693065	0.283504	0.241207	0.175161	0.496397	0.340567	0.0264481	0.232346	-2.01893	-0.633722	-1.84494	-1.51952	0.043679	-0.272612	-0.340882
Atg13	+	1.05627	0.619559	-1.0226	-1.00981	0.303667	-0.36885	-0.226094	-0.21631	0.421833	-0.550931	-1.61806	0.327311	-1.05822	-0.256994	-1.40851	-1.00852	-0.143869	-0.457318	1.08847	1.52758	0.110566	0.820584	1.2229	0.526075	0.259562	0.638662	-0.0211664	0.0875823	1.3357	-0.174387	0.117844	0.491395	-0.236432	0.111596	-3.89855	-0.68736	0.985614	0.32283	0.707686	1.28069
Atg16l1	+	-0.635348	-1.59826	-1.64466	-0.95274	-2.15347	-1.33003	-0.910466	-0.54678	-0.323319	-1.11986	-0.553417	-1.04847	-0.510332	-0.670594	-1.22818	-0.36328	-0.576007	-1.23401	0.585846	0.628152	1.22066	0.97526	1.14575	1.02637	1.11124	1.32039	0.763716	0.847571	0.924893	0.487704	0.704569	1.11383	0.975357	0.345885	0.0280077	-0.598911	0.544974	1.01002	1.21526	1.02268
Atg2a	+	-2.30245	1.06855	-0.767569	-0.0726186	0.31926	-1.57952	-2.11321	-1.23599	-0.0755552	0.744997	-1.12555	-0.973136	-1.21863	-0.311448	-1.4899	-1.0778	0.282442	-0.059772	0.839607	1.04448	1.15372	0.721007	1.02335	0.739047	1.00074	1.72736	0.656181	0.90455	1.00086	0.347194	0.246217	0.464337	1.14257	-0.13299	-0.175292	0.540823	0.212811	-1.33465	0.246204	-0.380234
Atg2b	+	0.564326	0.466508	0.374389	0.400867	0.404063	0.414542	0.451744	0.47609	0.216933	0.655555	0.547267	0.486067	-0.277745	-0.780191	-2.20863	-2.47079	-0.647294	-1.77492	0.873327	0.782747	0.582558	0.588803	0.794578	0.235296	0.237029	0.0786711	0.963292	0.941869	0.775379	0.815653	0.678659	0.668099	0.772954	-2.09168	-2.24478	-1.93664	-0.63954	0.266808	-0.282397	-0.159466
Atg3	+	-1.49669	-0.605096	0.436531	-0.649238	0.526539	-1.81972	0.17474	-1.29815	-1.42804	-0.95225	-1.45233	0.238582	-0.884429	-0.864874	-0.904892	-1.50085	-0.576747	-1.23438	0.998352	0.339872	1.05459	0.13671	0.403093	1.0708	0.845984	1.06704	1.19954	0.853858	1.35676	0.792799	0.904059	0.802303	0.647195	-0.212312	-0.740932	0.10983	-1.17429	1.07527	1.50561	1.25516
Atg4b	+	-0.57189	-0.120131	-0.253698	0.254787	-0.965795	-0.313372	-0.426167	-0.997944	-1.34822	-0.750762	-1.71643	-1.99631	-1.28689	-2.08817	-1.48356	-0.940413	-0.729307	0.926961	0.764924	0.4277	0.293996	0.666605	0.396186	0.859103	0.814419	0.649857	0.331646	1.2093	0.549627	0.56325	0.706639	0.483365	0.547626	0.710778	0.395681	-0.160116	-0.57146	1.97222	1.58567	1.61028
Atg5	+	0.434399	-0.273907	-0.276607	-0.0180999	-0.104511	-0.417608	-0.147244	0.369153	-1.31936	-0.860131	-0.857221	-1.04918	-0.320343	-1.23545	-1.47338	-2.20561	1.07665	-2.90385	-0.184273	0.19642	0.945939	-0.461478	0.507902	0.34295	1.17351	1.51954	0.370794	0.973242	1.04499	1.27035	0.676704	0.0714572	0.739139	-0.925675	0.11879	-0.828922	0.776407	1.13591	1.11714	1.00147
Atg7	+	0.534306	0.439001	-0.101594	-0.405652	0.501511	0.421258	0.789506	0.75293	0.521593	0.824088	0.777786	0.792595	-2.05805	-0.0301652	-0.24689	-0.749379	-2.63549	-2.18278	1.05801	0.738453	0.781876	0.66837	0.815485	0.55027	0.478837	0.812755	0.622099	0.586068	0.633022	0.676725	0.543759	0.0253379	0.327631	-1.06817	-0.962056	-0.732151	-2.79497	-0.469824	-0.647014	-0.589086
Atg9a	+	-0.180871	0.295154	-2.2144	-2.59167	-1.89739	-0.187784	-2.30847	-0.528032	-0.420256	-0.765644	-0.00565221	-0.239247	1.17376	1.30522	0.679957	-0.0430854	0.854543	0.658535	0.631968	0.0287048	0.0890583	0.495625	0.423167	0.702407	0.580462	0.647789	-0.283325	-0.484522	-0.331318	0.196675	-0.722534	0.432171	0.468717	0.695591	2.07128	0.824869	1.18503	0.208933	-1.45253	0.00711405
Atic	+	-0.00209144	-0.0447012	0.109769	0.0179337	-0.0542537	-0.0626113	-0.0557368	-0.0878857	-0.0781634	-0.166136	-0.0870247	-0.0883814	-1.95982	-1.9376	-2.13481	-2.14734	-1.59119	-1.62186	1.09999	1.12029	1.00686	0.986874	1.00294	0.779453	0.787055	0.722856	1.13179	1.13071	1.14731	1.04064	1.13347	0.637739	0.681749	-0.523631	-0.63499	-0.952193	-0.968308	0.236848	0.181244	0.243189
Atl2	+	1.05818	1.4449	0.877711	0.554361	1.3888	1.20846	0.754362	0.957289	0.805999	1.2806	0.934604	0.906129	0.60365	0.867231	0.603248	0.68758	1.23478	0.959192	-0.369514	0.00435597	-0.550772	-0.943761	-0.509866	-1.29866	-0.857044	-0.952809	-0.350533	-0.672645	-0.634966	-0.674648	-0.577244	-0.260638	-0.124361	-0.183885	-0.207845	-0.893003	-0.834892	-2.29007	-2.18888	-1.7554
Atl3	+	-0.215061	-0.0863118	-0.514482	-0.452275	-0.250268	-0.281106	0.316907	0.267696	0.393894	0.478683	0.380751	0.469892	1.75731	1.69775	1.70208	1.75168	1.47422	1.53646	-0.506861	-0.452075	-0.7024	-0.764331	-0.631348	-1.29294	-1.12617	-1.15874	-1.45344	-1.46939	-1.54984	-1.65409	-1.36296	-0.271083	-0.201703	0.740907	0.848181	0.959831	1.01372	0.169458	0.213093	0.224355
Atm	+	0.32154	-0.0354502	0.291159	0.232599	0.13596	-0.0949307	0.184079	0.0857354	-0.00814292	-0.127068	-0.340149	-0.0311674	-1.70989	-1.01609	-3.67964	-2.90632	-0.687562	-0.881997	0.778364	0.928737	0.88682	0.706586	0.655275	0.560378	0.929661	0.879286	0.2947	0.470564	0.444494	0.665312	0.798676	0.919366	1.04981	-0.473077	0.854274	-0.742915	-1.00626	0.330684	0.234823	0.10178
Atn1	+	-0.804772	0.467608	-2.32032	-0.831245	-1.95295	-0.504151	1.05482	-0.227883	0.649823	0.9614	-1.79862	-0.0135464	-1.43479	1.26161	-0.362148	0.493684	0.492318	0.583758	0.0883479	-1.16729	-0.310957	2.24786	0.479728	0.924659	-0.090368	0.855861	-0.346091	-1.0726	-0.0604787	0.322063	-0.288145	-0.204732	-0.35806	0.053133	1.21923	-0.688233	-0.884618	1.42375	0.527124	1.61524
Atox1	+	-0.720981	0.21739	-0.49106	-0.724424	-2.73349	-1.44614	0.0388994	-0.0240388	-1.96039	-0.078315	-1.72736	0.389059	-0.974513	-0.536617	0.00111056	-0.946565	-0.509104	-0.0409389	0.811499	0.749508	0.908609	0.655586	0.721055	-0.300251	-0.522869	-0.423858	1.20272	1.33449	1.30432	1.31419	1.2021	0.277062	-0.17096	-0.804685	0.134782	-0.151444	-0.272048	1.44019	1.59862	1.25887
Atp11a	+	0.744972	0.809946	0.686181	0.448539	0.665654	0.737749	1.24702	1.20058	1.54103	1.17114	1.49337	1.50103	0.565312	0.620458	0.857847	1.12861	0.57925	0.156635	-0.131477	-0.208759	-0.300319	-0.499032	-0.383978	-0.463429	-0.342662	-0.580062	-1.24647	-2.05526	-1.49163	-1.09859	-1.50089	-0.492548	-0.528547	-0.550576	-0.520784	0.52713	0.417944	-1.66613	-1.19758	-1.84168
Atp11b	+	0.633118	0.621351	-0.0845466	0.472061	0.108596	0.764342	0.591801	0.871739	0.634122	0.855478	0.890483	0.43815	-1.23833	-1.33966	-1.80559	-1.41931	-1.83957	-3.20811	0.452969	0.697505	0.252427	0.237251	0.644492	0.0345368	-0.0520199	-0.116764	0.400117	0.143923	0.0263392	0.123578	0.33657	-0.0366577	-0.186768	1.75384	1.12498	-1.57442	-1.54061	-0.115525	0.596111	0.851999
Atp11c	+	1.31714	1.25857	1.00309	1.10982	0.898576	1.26181	0.936505	0.868817	1.20321	0.972992	0.754437	0.983145	-0.606554	-2.09645	-1.62444	-1.35892	-0.948036	-1.23243	0.334862	0.232722	0.175957	0.35814	0.381829	-0.152271	-0.0324486	0.443822	0.324702	0.258555	-0.0621822	0.47825	0.197919	0.288211	0.639576	-0.894554	-0.951274	-1.55195	-0.885383	-0.984642	-2.31049	-0.990617
Atp13a1	+	1.20458	1.06825	1.22767	1.63965	1.35171	1.23245	1.43058	1.28162	0.936434	1.11469	1.24291	1.0738	0.354399	0.27417	0.922672	0.755635	0.247341	0.0360577	-0.296142	-0.413626	-0.467979	-0.284917	-0.357917	-1.23749	-1.05598	-1.0101	-0.946498	-0.790642	-0.99786	-0.527913	-1.22002	-0.0473998	0.0808611	-1.02365	-0.812005	-1.16878	-0.327675	-1.65467	-1.63238	-1.20186
Atp13a3	+	0.477271	0.420043	0.55685	0.77528	0.358939	0.250012	0.577925	0.203294	0.0330403	0.100066	0.403966	-0.0159087	0.356309	0.494034	0.63545	0.876732	0.854491	0.373305	-0.999753	-1.15766	-0.223658	-0.28563	-0.426667	0.602937	0.413678	0.31573	-2.11535	-2.41597	-2.87407	-1.248	-1.18278	-0.0659227	0.104028	1.65482	1.7914	1.1059	1.15694	-0.656525	-0.543701	-0.680836
Atp1a1	+	0.861141	0.82345	0.884366	0.934278	1.21063	1.14062	1.04457	0.984631	1.06547	0.889733	0.905608	0.903263	1.0218	1.11424	1.36942	1.40703	0.975948	0.813314	-0.240416	-0.134597	-0.441413	-0.383745	-0.414082	-0.98082	-1.1685	-1.13369	-0.900089	-0.997529	-0.977969	-1.00453	-1.0242	-0.859793	-0.952552	-0.839718	-0.827115	-0.0968953	-0.170753	-1.62411	-1.58342	-1.59357
Atp1a2	+	-1.11616	1.21304	0.84897	-0.383949	1.18454	0.987507	1.2343	1.28237	1.23304	-0.127558	1.29295	-1.34368	-0.568264	-0.441249	-1.00663	-1.60046	-0.25951	-1.22889	1.13622	1.1461	1.18596	-0.68747	0.870217	-0.882811	0.9459	-1.13471	-1.83262	-0.64946	-0.666862	0.291089	0.467466	0.966365	-0.637229	-0.575452	-0.580817	-1.28701	-0.0326593	0.865543	-1.06223	0.954094
Atp1b1	+	0.0352254	-0.0170363	-0.10296	-0.0463702	-0.147179	-0.16171	-0.258731	-0.322302	-0.195897	-0.27969	-0.234502	-0.229617	1.46675	1.49366	1.45295	1.45321	1.49658	1.46703	-1.3272	-0.905987	-1.09192	-0.917276	-1.1392	-0.61925	-0.918849	-0.874089	-1.01587	-0.930502	-0.873628	-0.999656	-0.818979	-1.40189	-1.20711	1.27417	1.37491	1.41304	1.36636	0.918136	0.917139	0.908261
Atp1b3	+	1.12563	1.0729	1.1633	0.926268	0.802851	1.05095	0.834545	0.948727	0.84955	1.45017	0.738361	0.504652	0.496985	0.665519	-0.0724091	0.00542019	0.273216	0.195508	-0.0639443	-0.00149132	0.169943	-0.157107	-0.224199	-0.086168	0.468021	-0.353251	-1.97599	-1.56076	-2.20789	-0.724784	-0.598318	-0.250085	-0.384303	-1.03068	-0.141966	1.45928	0.0861779	-2.3553	-1.90647	-1.19285
Atp2a2	+	0.973554	0.769353	1.02482	0.908076	1.20611	0.996331	0.951855	0.967676	0.919205	1.03622	0.99336	1.03812	1.18817	1.17306	1.23085	0.949783	1.02103	1.06252	-0.628976	-0.546786	-0.883477	-0.698657	-0.872359	-1.48126	-1.37208	-1.4663	-0.980781	-1.21679	-1.08575	-1.41819	-1.08526	-0.205997	-0.172103	-0.200752	-0.630209	0.0155814	-0.206374	-1.06349	-1.26171	-0.948359
Atp2a3	+	-0.0665214	-0.609203	-0.96223	0.0912497	-0.341312	0.0551913	-0.741655	-0.347378	-1.19302	-0.543457	-0.351148	-0.0875505	-0.726317	-1.38423	-1.33883	-0.242058	-1.15023	-1.42477	0.911594	0.849529	1.34616	1.26801	1.43662	1.71795	1.65579	1.73163	0.390334	0.581494	0.404402	0.314606	0.621187	1.6817	1.60133	-1.11128	-0.824661	-0.585518	-0.931067	-0.384727	-1.36656	0.0549421
Atp2b1	+	-0.225435	-0.170024	0.738671	0.789129	0.0364426	-0.167036	0.548683	0.50298	0.343845	-0.459071	-0.122604	-0.0724539	1.54003	1.33155	1.35602	1.70068	2.1773	1.86525	-0.463191	-0.992893	-0.800065	-0.391113	-0.545861	0.86623	0.41905	0.107677	-1.69348	-1.34532	-2.57857	-1.44973	-1.17175	-0.338233	-0.0293023	-1.10688	0.260738	-0.451845	0.00554062	-0.0138265	-0.201125	0.200016
Atp2b3	+	-0.254543	0.0115573	1.51146	1.49048	-0.553289	-0.64427	1.49256	-0.517841	-0.0608054	-1.44716	-2.35732	-0.758755	0.199123	-0.509604	1.19361	-0.421535	0.00114308	-1.31126	0.216015	-0.874348	0.91407	-0.504425	0.909798	-0.740808	0.143701	-0.177889	0.743488	0.92537	1.24145	0.971245	0.957677	1.15157	0.398824	-1.31682	-1.42909	-1.10544	-0.942889	-0.836291	1.65682	0.63444
Atp2b4	+	-1.42265	-2.09115	-1.48041	-1.34121	-1.81528	-1.60646	0.212489	0.391946	-0.0903091	0.414339	-0.138604	-0.451776	0.756629	0.268647	0.737828	0.919503	0.271791	-0.549451	0.509261	-0.187057	0.581436	0.0690899	0.468704	0.470368	0.620167	0.917882	-1.83015	-0.903268	-0.634321	-0.734007	-1.09904	0.221355	0.555303	0.372311	1.437	1.028	0.512985	1.73421	1.46187	1.44204
Atp2c1	+	0.906977	0.912045	0.994754	1.0415	0.341987	0.927375	0.414506	0.438567	0.744312	0.428729	0.269424	0.653161	0.309229	0.762896	1.33782	1.09542	1.4238	1.18629	-0.869811	-1.22396	-1.11723	-0.706179	-0.928632	-0.302675	-0.632297	-0.441514	-2.20223	-1.49719	-0.816159	-1.23232	-1.74165	-0.498252	-0.986101	1.03166	0.44133	0.671894	1.43848	-0.566569	-1.44705	-0.562338
Atp5f1a	+	1.19183	1.0912	1.09335	0.928534	1.27445	1.13941	1.31711	1.30323	1.3436	1.2768	1.39833	1.38577	0.163684	0.166163	0.527879	0.485364	0.243443	0.205737	0.102416	0.194735	-0.273301	-0.273468	-0.350703	-0.863932	-0.93166	-1.00598	-0.444599	-0.524685	-0.49072	-0.855315	-0.857852	-0.141726	-0.154631	-1.27542	-1.34232	-0.822197	-0.679189	-1.90917	-1.82505	-1.81111
Atp5f1b	+	1.31488	1.23212	1.13012	1.34736	1.32326	1.12403	1.17548	1.28192	1.19123	1.23801	1.2709	1.25743	0.160137	0.140776	0.522488	0.516338	0.162932	-0.073433	-0.0535979	0.0373138	-0.312276	-0.400737	-0.426881	-0.903395	-0.896121	-1.01533	-0.330437	-0.193199	-0.312641	-0.83247	-0.936465	-0.211577	-0.352312	-0.893277	-1.49673	-0.497951	-0.474479	-1.90992	-1.96543	-1.93808
Atp5f1c	+	1.03908	1.12202	1.09906	0.947986	1.51569	1.25293	1.5358	1.40978	1.50604	1.52748	1.47513	1.35965	-0.111729	-0.304908	-0.0698324	-0.0703518	-0.408387	-0.302711	-0.0302385	0.191824	-0.194995	-0.122132	-0.0939482	-0.900912	-0.82954	-0.906999	-0.768	-0.881132	-0.914064	-1.01643	-0.97674	-0.022442	-0.0797389	-0.747203	-0.652965	-0.0512284	-0.149484	-1.81303	-1.58331	-1.98003
Atp5f1d	+	0.861943	0.929221	0.717076	0.671448	1.26966	1.18496	0.97876	0.883198	1.44162	1.42793	1.37261	1.37152	0.187797	0.279645	-0.298939	-0.246076	0.0157264	-0.174527	0.446939	0.675172	0.0930003	0.399328	0.0282906	-0.348799	-0.336361	-0.311917	-0.676056	-0.902522	-0.2996	-0.819815	-0.849152	-0.121619	0.0101513	-2.71831	-2.80129	-0.421798	-0.534083	-0.950772	-1.16562	-1.26874
Atp5f1e	+	1.19691	1.10696	0.451548	0.178074	0.900006	0.830544	1.4878	1.43294	1.39592	1.44684	1.62849	1.62656	-0.394628	0.138073	0.0451096	0.109547	-0.22408	-0.48379	0.277791	0.336402	-0.269329	-0.164346	-0.362123	-0.918592	-0.715419	-1.1443	0.267287	0.495729	0.383764	-0.235804	-0.129525	-0.136691	-0.188073	-1.02429	-0.948236	-0.899928	-1.71304	-1.86804	-1.9613	-1.95477
Atp5if1	+	0.364401	0.493414	1.08051	0.929758	0.782091	0.558531	0.966115	0.989279	0.183867	0.14542	0.542958	0.70414	0.0924315	0.469013	2.0217	1.99361	1.79968	1.54497	-0.718112	-0.576063	-1.63601	-1.18011	-1.27637	-1.44514	-1.42005	-1.26038	-0.780127	-0.780972	-0.76868	-0.738149	-1.1161	-0.976057	-1.26587	-0.0155126	0.0692657	-0.527042	-0.162417	0.328171	0.371842	0.212003
Atp5me	+	0.644476	0.829309	1.05682	1.37385	1.27086	0.821531	1.07794	1.18799	0.201051	0.162663	1.14355	1.66216	-0.762924	0.0455327	0.950409	1.02608	0.643656	0.36257	-0.788127	-0.859745	-1.24742	-0.831505	-0.891868	-1.24299	-1.94266	-1.1387	-0.850952	-0.600162	-1.42085	-1.66677	-1.14538	-0.368674	-1.44358	1.28436	0.590072	0.480587	0.260735	0.0431749	0.23138	-0.148453
Atp5mf	+	1.44947	1.18215	2.44207	1.39777	0.549861	0.928425	1.07656	1.39433	0.659173	0.458979	1.10454	0.908664	0.47588	-0.0489218	0.814082	0.457853	0.659426	0.427257	-0.449184	-0.565526	-1.30122	-0.801182	-1.10103	-1.05106	-0.714061	-1.97099	0.460149	0.206221	0.249177	-0.608639	-0.547869	-0.708096	-0.570638	-1.33976	-0.612419	-0.767542	-0.482322	-1.24362	-1.0311	-1.38685
Atp5mg	+	0.13779	0.138755	0.543178	0.307915	-0.308674	-0.278494	0.83702	0.942238	0.836881	0.654635	1.14588	0.301385	-0.106125	-0.153989	-1.18728	-0.494166	-0.960162	-1.11489	-0.296485	-0.216509	-0.424303	-0.498347	-0.536371	0.0289859	-0.189297	-0.866342	-1.23448	-1.4611	-1.3984	-0.944744	-0.919587	0.0379288	-0.0273026	3.07908	1.09909	2.69985	1.64141	-0.587573	0.326857	-0.554256
Atp5mk	+	0.904643	1.06355	1.26302	0.930771	0.765525	0.646139	0.879235	1.09362	0.600207	1.05711	0.751224	0.501947	0.409268	0.68233	1.062	0.976771	0.340871	0.626993	-0.933391	-1.00255	-0.775469	-1.21659	-1.0081	-0.960756	-0.986321	-0.893344	-1.89413	-1.89422	-1.73113	-1.36048	-0.668034	-0.809434	-0.777477	0.850838	0.899642	1.22737	0.919302	-0.501764	-0.629079	-0.4101
Atp5mpl	+	0.767769	0.700219	0.558038	0.347043	0.860556	0.561999	0.537806	0.837708	0.923917	1.04845	1.20112	1.17557	0.651868	0.802472	0.805692	1.09971	0.408143	0.322679	0.37568	0.145673	-0.184542	-2.39129	-2.24752	0.629227	-0.602026	-2.20801	0.0892695	-0.0766957	-0.477546	-0.103512	-2.26435	-1.83956	-0.0928865	0.0154451	-0.0698904	-0.0908651	-0.0444233	-0.578198	-1.28311	-0.311623
Atp5pb	+	0.925821	1.0612	1.23002	1.34003	0.94077	0.800245	1.5333	1.6	0.747139	1.08944	1.07392	1.21875	-0.220447	-0.0993094	0.880608	0.792553	0.530626	-0.0955831	-0.174427	-0.344699	-0.0412406	-0.03916	-0.610516	-0.492928	-0.749824	-0.916736	-1.00963	-1.41016	-1.48916	-0.979445	-0.970006	0.226897	0.199143	-0.569395	-0.306074	0.41848	-0.382919	-2.13579	-1.97072	-1.60075
Atp5pd	+	1.0389	0.848215	0.681784	0.499228	1.05752	0.878742	1.56034	1.3873	1.46272	1.29046	2.00108	1.92887	0.168512	0.200188	0.828147	0.721429	0.436586	0.586706	-0.0974259	-0.0635886	-0.788751	-0.835555	-0.849936	-1.12578	-1.18175	-1.12633	-0.393385	-0.394559	-0.374777	-0.784712	-1.00463	-0.768273	-0.824064	-0.547133	-0.849653	-1.1618	-1.59487	-0.918481	-0.852535	-1.03873
Atp5pf	+	0.741613	0.781653	1.01265	0.887636	0.506919	0.424326	1.25572	1.32369	0.819822	0.800985	0.219551	0.414385	-0.0320317	0.136557	0.308494	0.225428	-0.0792106	-0.0291034	-0.501043	-0.364489	-0.150192	-0.144789	-0.339554	-0.875079	-1.15356	-0.801194	-0.23062	0.023535	0.00803256	0.153288	0.341373	-0.566051	-0.635922	-0.446232	-5.07841	0.0681456	-0.0468623	0.287194	0.311949	0.421401
Atp5po	+	1.31246	1.53054	1.17996	1.15593	1.01524	0.76386	1.14054	1.3835	1.63279	1.45712	1.15678	1.39257	0.181826	0.171075	0.654221	0.565486	-0.15221	-0.035191	-0.572782	-0.500794	-0.766004	-0.614445	-0.581296	-0.619592	-0.843066	-0.857258	-0.128411	-0.324748	-0.169913	-0.819162	-0.826271	-0.375509	-0.535735	-0.669108	-0.649895	-0.353916	-0.37624	-2.01428	-1.92014	-1.98793
Atp6ap1	+	1.40872	1.31662	1.62089	1.64813	1.07271	0.962719	1.32005	0.973873	0.978355	1.24896	1.10598	0.785342	-1.11135	-0.0607699	0.0751138	0.735777	0.874479	0.590778	-0.709663	-0.643178	-0.199076	-1.21304	-0.854989	-0.0272278	-0.498184	-1.13685	-1.04616	-1.62435	-0.838544	-0.481729	0.0276816	-2.13995	-1.19456	-0.523016	0.554771	-0.454746	-0.334485	-0.794064	-0.760396	-0.654629
Atp6ap2	+	1.45157	1.45415	0.955624	0.907149	1.25976	1.01381	1.13221	1.13357	1.50679	1.44461	1.55409	1.62113	0.0232336	0.324476	-0.1619	-0.26893	-0.292765	-0.298114	-0.169037	-0.322063	-0.625636	-0.185451	-0.03936	-0.181187	-0.571464	-0.252336	-0.468296	-1.26955	-1.72534	-1.16315	-1.33371	-0.639265	-0.52303	-0.269763	-0.391278	-0.253241	0.10492	-0.50218	-1.95195	-2.02811
Atp6v0a1	+	-0.685742	-0.76749	-0.579152	-0.387987	-0.826607	-0.693651	-0.361589	-0.254723	-0.605996	-0.625438	-0.466559	-0.292994	1.0891	0.866666	1.46133	1.50695	0.869438	0.613236	-0.129805	-0.776302	0.0946999	0.00951256	0.111278	1.07015	1.15549	1.20835	-1.83039	-2.14135	-1.54073	-1.47169	-2.10421	0.186328	0.128252	1.18795	0.837373	0.850839	1.35107	0.889432	0.449491	0.605488
Atp6v0a2	+	0.185483	-0.00838782	-1.12492	-1.09192	-0.269743	-0.0716583	-0.241718	-0.00253684	0.443341	0.657054	0.40484	0.376596	1.63929	1.75522	1.47592	1.31101	1.07645	1.57743	-0.330859	-0.905704	-0.25282	-0.0147028	-0.146469	-1.12321	-0.655013	-0.009893	-1.61829	-2.41043	-2.26699	-1.27058	-0.650916	-0.12454	-0.372318	1.04649	0.540348	0.471958	1.23869	0.665995	-0.133261	0.230752
Atp6v0c	+	1.09431	1.20651	1.46536	1.39038	0.998007	0.863315	1.7834	1.7128	1.33016	1.53016	1.25702	1.1347	-0.675536	-0.999355	0.229831	0.205679	-0.538828	-0.923224	-0.212672	-0.404362	-0.166854	-0.26504	0.169402	-0.104327	-0.391231	-0.0718228	-0.299004	-0.951502	-0.844672	-1.4225	-1.34714	-0.679011	-0.92203	0.0923224	-0.716653	0.199006	-0.286019	-1.19684	-1.76404	-1.47969
Atp6v0d1	+	1.16923	1.0622	0.204278	0.803494	0.758465	0.65694	0.840414	1.23128	0.776008	0.843356	1.51411	1.45424	0.232672	0.540999	0.653964	0.257263	0.387087	-0.0902272	-0.486762	-0.497917	-0.766966	-0.715735	-0.743273	0.320528	-0.0307739	0.2779	-1.60648	-1.74628	-1.71605	-1.68295	-1.8085	-1.33782	-1.03274	1.48676	1.31685	-0.323036	0.00131262	-0.379039	-0.631344	-1.19346
Atp6v1a	+	-0.262765	-0.409999	-0.539414	-0.952792	-0.508443	-0.514385	0.360632	0.391753	0.496227	0.559164	0.410317	0.416391	-0.362211	-0.419407	0.0451051	0.196813	-0.939282	-0.759408	1.36962	1.4069	1.53325	1.6365	1.65498	1.69909	1.83671	1.73876	-0.389602	-0.608525	-0.266206	-0.380056	-0.0891105	0.36273	0.361829	-1.56395	-1.5538	-1.39585	-1.3439	-1.05762	-0.894222	-1.26584
Atp6v1b2	+	-0.682221	-0.928761	-0.231289	-0.542522	-0.678359	-0.998332	0.165617	0.0530677	-0.00402144	0.0356346	-0.0113189	-0.335259	1.04281	0.599519	1.37173	1.28602	0.174229	0.166915	0.776818	1.18455	1.46508	1.37745	1.35035	1.47716	1.54655	1.40469	-1.0691	-1.26454	-1.05009	-0.389131	-0.360708	0.552654	0.537592	-1.7364	-1.18586	0.138959	-1.02963	-1.66671	-1.15175	-1.39139
Atp6v1c1	+	-1.06014	-0.565342	-0.411739	-0.686208	-1.47197	-0.595482	0.264372	0.144714	0.00230386	0.338874	-0.38365	0.162328	-0.597811	-0.217387	0.233763	0.0958286	-0.490687	-1.30804	1.54906	1.22163	1.52148	1.44415	1.51305	1.97971	1.95202	2.52103	-0.41677	-0.33879	-0.584452	-0.128328	0.127809	0.232862	0.328581	-0.717498	-0.747801	-0.766853	-0.762387	-1.30328	-1.02415	-1.0548
Atp6v1d	+	-1.17857	-0.961999	-0.271793	-0.543742	-0.825075	-0.64177	0.0584464	-0.391529	-0.808748	-1.333	-0.512789	-0.702897	1.06629	0.271442	1.51737	1.12983	0.817565	1.6545	-0.0340733	0.554184	0.949504	0.910907	0.662662	1.6397	1.01721	0.645569	-1.99131	-1.9234	-1.47085	-0.681839	-1.34461	0.18628	0.0688702	0.515218	-1.26789	0.999748	1.22845	-0.0473214	0.520599	0.518852
Atp6v1e1	+	-1.51345	-0.30664	-0.0164793	-0.16502	-1.47489	-0.982106	0.215404	-0.175348	0.344667	0.605344	-0.452217	-0.323492	0.234389	0.214403	1.04455	1.53126	-0.0264865	0.63563	0.388217	0.701725	0.397082	1.27586	0.647988	2.16806	1.09021	2.05398	-1.69351	-1.29668	-1.25722	-0.794188	-0.372102	0.0769651	0.370978	1.08161	-0.642665	-0.345763	0.577286	-0.532803	-0.963206	-2.32134
Atp6v1f	+	-0.377715	0.439145	0.157386	0.356625	0.303107	0.4724	0.842655	0.980546	0.373458	0.537332	0.570043	0.834145	-0.538433	1.18888	1.27487	1.23553	1.09234	-0.97224	0.135778	-0.102991	0.1222	-0.190829	-1.91496	-0.543499	-0.128857	0.105228	-1.78967	-0.405692	-2.32118	0.094923	0.163776	-0.162793	-0.0856071	-1.30217	-1.4979	-1.779	-1.42362	1.43667	1.31944	1.50067
Atp6v1g1	+	-1.27427	-0.347088	-1.62931	-1.19681	-0.953363	-0.897873	-0.594265	0.0391524	1.48178	0.857155	1.22285	1.65997	1.08773	2.25633	1.56374	1.40421	1.47728	1.46196	0.786292	0.656652	-0.462239	-0.290692	0.00474771	-0.0911299	0.173266	0.328661	-0.498984	-0.344983	-0.143213	-1.35157	-0.717962	-0.804697	-0.762852	-0.420986	-0.815876	-1.06745	-1.05782	-0.419523	-0.408877	0.0900481
Atp6v1h	+	-0.854781	-1.14107	-0.744191	-1.35012	-0.99197	-1.36928	0.244796	0.213326	-0.354712	-0.145598	0.128886	0.0201262	0.617706	0.198037	1.27632	1.14057	-0.363919	-0.101286	1.0838	1.23151	1.6208	1.78093	1.4816	1.15087	1.44252	1.1636	-0.979181	-0.330056	-0.738536	-0.216647	0.0107516	0.657704	0.583462	-1.85391	-1.19948	-1.94203	-1.1936	-0.00682381	-0.0359231	-0.134188
Atp7a	+	0.913536	1.16095	0.874734	0.913379	0.99824	1.20589	0.953623	1.11439	1.02546	0.988403	1.02249	0.990448	-0.477506	-0.320339	-0.441369	-0.322012	-0.31546	-0.328858	0.21292	0.284799	-0.0708911	0.175466	-0.143339	0.595598	-0.00721729	0.366962	-0.476935	-0.39255	-0.584578	-0.439678	-0.662597	0.261611	-0.0951703	-0.193259	-0.523983	-0.326352	-0.450287	-0.82644	-3.06865	-3.59143
Atp8b2	+	0.873773	0.782075	0.537235	0.469928	0.346122	0.681651	0.45489	0.570436	0.601025	0.598658	0.611831	0.279168	0.0403425	-0.180325	-0.0783822	-0.0398588	-2.68909	0.0645642	0.617691	1.04548	0.295654	-1.99198	0.0613329	0.207182	0.300139	0.223381	1.54635	1.00004	0.573855	1.03558	-0.899945	0.755936	-0.840841	-0.915603	-2.20902	-1.43847	-0.200578	-1.96316	0.584253	-1.7113
Atp9a	+	0.584593	0.654354	0.424832	0.372754	0.332443	0.499394	0.722707	0.677422	0.763029	0.706873	0.670572	0.626398	-0.0237267	-0.14233	0.142089	-0.561913	-2.99747	-1.28184	0.648455	0.262301	0.888273	0.777741	0.870616	1.16704	0.977583	1.13948	-0.37215	-0.976115	-0.311612	-0.380287	-0.442924	0.874432	0.964211	-0.982526	-2.58498	-1.58975	0.163918	-0.559187	-1.41589	-1.28881
Atp9b	+	0.12166	0.290842	0.279027	-0.0233743	-0.0747144	0.376383	0.634028	0.41777	0.121858	0.73161	-0.0699477	0.421332	1.59074	1.51335	0.772301	1.50551	1.78343	0.896153	-1.97166	-1.73991	-0.87092	-0.144171	-0.752829	-0.545812	-0.421977	-0.711686	-0.945436	-1.71921	-2.37457	-0.722467	-0.789461	-0.736961	-0.336701	0.0542131	0.489552	1.14846	1.77626	0.513816	-0.425578	-0.0609059
Atpaf1	+	1.41043	0.546343	1.27694	1.67718	0.630772	0.774359	0.276559	0.00117837	0.0439133	0.446371	-0.230053	0.236654	0.817336	0.0573252	0.556421	0.742543	0.679029	0.098795	-0.472303	-1.40493	-0.229211	-0.602982	-0.476777	1.00357	0.622103	0.518497	-1.40291	-1.35208	-2.27063	-0.624813	-1.42621	0.95962	0.885487	0.365426	-0.0630705	0.535898	0.85326	-2.06231	-1.9422	-1.45555
Atpaf2	+	0.27175	0.409427	0.790687	1.19896	0.867791	0.792045	0.408089	0.591881	0.00514251	-0.195657	0.00732771	0.335417	-0.584025	-1.89031	-0.99248	-0.657808	-0.680468	-2.47707	0.0817332	-0.250652	0.632881	-0.267131	0.2611	-0.467859	0.35633	0.746869	0.280908	2.11994	1.76989	0.500942	0.159087	0.324318	0.626903	0.177223	-0.464708	0.428521	-0.00329953	-3.19875	-0.884008	-1.13093
Atpsckmt	+	0.240913	1.12079	0.561935	0.451703	0.657561	1.02814	1.28297	1.02804	1.14203	1.05284	1.13643	1.1632	0.411522	0.886062	0.303613	0.675297	0.144813	0.314916	-0.233108	-1.37014	-1.40331	-0.0939897	-0.830414	-0.493244	0.520891	-0.640107	-1.8761	-0.343576	-1.47527	-1.84285	-1.58849	-1.25428	0.164753	0.690953	1.20517	-1.01326	1.1245	-1.28587	-0.372122	-1.1929
Atr	+	-0.306413	1.02067	0.304053	-0.421836	0.498578	0.358751	0.160661	-0.0858278	-0.537994	0.49435	0.0540843	0.406387	0.790877	0.43481	-0.295824	-3.93544	-3.85074	-0.315084	0.0935308	0.367001	0.220215	0.386336	0.287817	-0.567578	0.674571	0.257859	0.587085	0.914389	0.648956	0.44143	0.612912	0.440879	0.453469	0.0275066	-0.675627	-0.78199	0.262006	0.358698	-0.0235449	0.240013
Atraid	+	-0.901139	-0.0316027	-0.371752	0.697524	-1.46719	0.429381	1.21587	0.738945	0.371497	0.780424	0.970405	0.65363	0.983848	1.03779	1.52975	1.46948	1.26849	0.809566	-0.43978	-0.741058	-0.567692	-1.30802	0.217861	-1.92004	-1.43167	0.337352	-0.575498	-1.49326	-1.63125	0.383236	-2.48712	0.60846	0.523637	-0.220308	0.478216	0.434348	-0.55842	0.253978	-0.553196	0.505303
Atrn	+	-0.476795	-0.583735	-1.01062	-2.12913	-0.0745364	0.487914	0.569057	0.103797	-0.375846	0.202076	-0.353986	0.0293535	1.45144	1.88574	1.9998	1.26609	1.20516	1.48653	0.653695	-0.346682	-0.383104	-1.25291	-0.344817	-1.75442	-1.89925	-1.70748	-0.168141	0.927693	0.000563624	-0.39134	0.550087	0.4431	1.01269	-1.19333	-0.368151	-0.0410269	0.24404	-0.547774	0.759921	0.124322
Atrnl1	+	0.34177	-0.094728	-1.62302	-1.68664	-1.2364	0.415429	-0.225935	-0.208487	0.0293365	-0.580562	-0.042143	-0.429439	1.09028	1.87108	1.60384	1.46404	1.49135	0.956146	0.630453	-0.300506	-0.139028	0.245962	-1.46059	-0.380337	-0.35194	0.401819	-0.780217	0.263972	-1.88546	-2.26003	-1.48653	0.831223	-0.0690336	0.204638	-0.0701184	1.06922	1.2134	0.283723	0.411435	0.49201
Atrx	+	0.321973	0.0926427	0.577285	0.239864	-0.312141	-0.40818	0.472923	0.578113	-0.321793	-0.0478831	-0.357864	-0.0408066	1.92586	1.66338	1.38517	1.31328	2.02062	1.72165	-0.449542	-1.01533	-0.46044	-0.708006	0.084785	0.417855	0.642834	0.970417	-1.83606	-1.70935	-1.13054	-1.7191	-1.75203	-0.238986	0.378827	-0.719184	-0.175976	-0.872877	-1.01661	0.575835	-0.441787	0.351163
Atxn1	+	-1.9506	0.609678	-1.19062	0.201248	-1.83193	-0.378558	-1.39107	-0.573095	-1.26881	-0.224984	-1.21518	-0.673442	1.03954	1.22733	1.3109	1.31477	0.835114	0.772849	-0.416966	-0.0322995	-0.351818	-0.0108251	0.0351716	-0.147646	0.314925	0.650863	-1.54684	-0.607645	-0.673967	-0.519217	-1.24065	0.250297	0.0774925	1.21691	0.151813	0.305912	0.981628	1.5539	1.73875	1.65708
Atxn10	+	0.152245	0.0414793	-0.2097	-0.245292	0.317729	0.364233	0.0467402	-0.0876585	-0.0823395	0.213091	0.405313	0.444826	-1.79128	-1.55263	-2.19353	-1.86022	-1.6505	-2.01152	1.58223	1.79059	0.815284	0.869523	1.05803	0.136059	-0.0714925	-0.127353	1.32151	1.2806	1.30325	0.436407	0.46894	0.389631	0.518494	-0.78495	-0.701108	-0.989281	-0.852645	0.407628	0.364198	0.48346
Atxn2	+	-1.5134	-1.12825	-1.8323	-1.64182	-2.07895	-1.72464	-0.714464	-0.485173	-0.644356	-0.452718	-0.865112	-0.545305	0.402335	0.473102	-1.27278	-1.15867	0.0161751	0.400843	1.1487	1.28438	0.727856	0.670222	0.729754	0.590422	0.846363	1.17187	1.51949	1.02215	1.15036	0.399757	1.01821	-0.472132	0.0477174	0.343594	0.492436	1.01643	1.30842	0.0365436	-0.125096	-0.161966
Atxn2l	+	-0.896897	-0.672356	-0.783722	-0.755157	-1.09528	-1.14166	-1.17781	-1.037	-1.10044	-1.22911	-1.21836	-1.0863	-0.816644	-0.835858	-2.038	-1.79556	-0.594048	-0.33589	0.767284	0.887155	0.620583	0.723066	0.789697	1.06717	1.21732	1.2127	1.03725	0.917017	0.884736	0.809024	1.00145	0.468964	0.495078	0.812967	0.49295	0.498935	0.620879	1.00302	1.25914	1.0237
Atxn3	+	-0.157107	-0.602672	-0.413959	-0.383384	-0.32059	-0.476731	-0.298074	-0.379494	-0.945766	-0.397271	-0.409438	-0.460326	-0.617655	-1.48571	-2.01736	-1.73908	-1.78387	-1.0079	1.14015	1.24503	1.11322	1.15515	1.22833	1.10161	1.15697	1.0727	1.12998	1.2009	1.35488	1.06292	1.10749	0.910007	1.03261	-0.392437	-1.00571	0.0334683	-1.30606	-0.25644	-0.197699	0.00930397
Atxn7l3	+	-2.06891	-0.138429	-1.82587	-1.7282	-0.893344	0.884028	-0.623317	0.571516	1.10439	0.0251556	0.167928	-0.390091	0.583808	1.19677	1.52168	0.951211	-0.265022	0.0385501	0.18672	-0.453446	0.0686729	-0.335346	0.238156	-0.719886	0.686571	-1.76543	-0.325096	-0.474991	-0.199315	-0.164856	-0.860852	-0.0621388	-0.601836	0.93998	-0.15827	-0.96999	1.19141	1.86236	2.61117	0.194561
AU041133	+	0.840552	0.873857	0.886922	0.712107	0.741158	0.985496	-0.044781	0.857504	0.79937	0.845452	0.389095	-1.60218	0.232246	-1.36018	0.535829	0.835807	-1.12057	1.20395	-0.845806	-1.51242	-0.647081	0.771064	0.67851	-1.47631	-2.11558	-0.852812	0.515227	0.349577	0.415084	0.51604	0.574172	-2.23819	0.649831	-1.53629	0.582224	0.907621	-1.01928	0.320019	-1.02749	0.380266
Auh	+	1.17506	0.34547	0.394312	0.375186	0.840131	0.692004	0.860729	1.35074	1.63239	0.833059	1.47845	1.46599	1.02827	0.880413	-0.147964	0.269106	-0.705952	0.221201	-0.0163499	-0.337304	-0.105973	0.0209773	0.105272	0.191679	0.0838729	0.265209	-1.71646	-1.34471	-1.20796	-1.71529	-1.09235	0.673803	0.0451824	-1.77276	-1.11818	-0.391701	-0.421729	-1.83231	0.633994	-1.93552
Aup1	+	0.776159	0.582486	0.311301	0.350726	-0.22125	0.137852	0.916741	1.00554	0.591309	0.747349	1.30753	-0.347458	1.8778	0.55105	0.774209	0.47706	1.59433	0.0588368	-1.7962	-2.06555	-0.593545	-0.92938	-1.66505	0.441669	-0.889995	-0.583496	-0.377219	0.0305773	-0.693389	-0.882163	-1.29434	-0.18567	-0.000426369	0.068634	0.115198	1.78634	1.58235	-1.01601	-1.07633	-1.46757
Aurka	+	1.16581	1.10621	1.44827	1.58395	0.813847	1.01241	0.781255	0.871835	0.601456	0.479526	0.376417	0.721425	-1.75991	-2.33707	-2.6029	-2.36965	-0.902592	-0.596181	-0.374081	-0.184697	-0.453254	-0.245501	-0.301821	0.168276	0.471868	0.128921	0.452214	0.561418	0.492529	1.0459	0.836398	-0.0258883	0.381966	-0.682968	-0.445618	-0.730374	-0.647332	-0.219223	-0.213144	-0.409698
Aurkb	+	1.74095	1.79851	1.86086	1.75364	1.62373	1.36685	0.551493	0.130044	0.446098	0.572071	0.41045	0.422503	-0.0324433	-0.208321	-1.189	-1.65698	0.835254	0.704526	-1.25652	-1.50438	-1.37888	-1.53694	-1.56852	-0.817796	-0.974992	-1.142	-0.0460284	-0.208174	-0.0627589	0.0388735	0.194008	-0.374678	-0.501915	0.447406	0.150273	0.297353	0.417631	-0.279579	-0.657638	-0.364981
Auts2	+	-0.367315	-0.0369872	0.0694235	-2.03581	1.04607	1.26673	0.785731	1.02518	1.16791	1.65811	1.49474	-0.833794	-1.77133	-0.806393	-2.32978	-0.161231	0.0978377	-0.0767955	0.339683	-0.183042	0.637265	0.133632	0.306497	-0.132739	-0.857378	-0.233253	1.44999	1.21032	0.206659	-1.39497	0.948714	0.916842	-0.0986789	-0.915905	1.05789	-0.89548	-0.0308489	-0.567702	-1.04967	-1.04011
Aven	+	0.413617	0.350423	0.610678	0.459699	0.43068	0.336926	0.195325	0.149716	-0.0169131	0.303624	0.32422	0.258907	-1.88819	-2.85891	-0.619115	-1.58188	-0.375337	-2.38603	0.623407	0.586783	0.659882	0.635844	0.67458	0.851208	0.676313	0.627702	0.75053	0.742147	0.75341	0.836082	0.795119	0.569277	0.570857	-2.06772	-1.81261	-1.35927	0.584272	0.147242	0.0242533	0.0232435
Avil	+	-0.17692	-0.0576399	-0.11422	-0.132895	-0.186219	-0.115078	-0.102922	-0.0725716	-0.0234064	-0.077118	-0.119373	-0.0284997	0.398009	0.380884	-1.12224	-1.97962	-2.30646	0.415991	0.915003	0.955971	1.00708	1.00998	1.01108	1.08219	1.03055	1.0644	0.423783	0.445076	0.424888	0.41043	0.473816	1.0143	1.0298	0.476546	-1.84403	-2.4097	-1.9399	0.256762	0.384795	-1.80253
Avl9	+	-1.95961	-1.34465	-1.69079	-0.593755	0.457793	0.315069	0.355355	-0.549665	-0.116407	0.0803086	0.261337	0.33546	-2.00753	-1.88043	-2.00141	-1.22897	-0.93379	-0.980038	0.624739	0.844272	0.87567	0.792161	0.975434	0.878471	0.917699	1.267	0.728719	0.602399	0.67752	0.613788	0.643321	0.86537	0.753249	0.218589	0.266504	-1.50345	0.211596	0.566029	0.701932	0.960703
AW551984	+	-1.15437	-0.598776	-0.296108	0.535743	-0.639453	0.361323	-1.10927	-0.0120528	-0.729516	-1.36699	-0.500287	-0.689623	-0.659812	-1.69323	-1.10576	-2.53792	1.67455	-1.09203	0.496982	0.442595	0.5747	0.516217	0.0304288	-1.85496	-0.235617	-0.516615	1.46277	0.726476	0.712429	0.973849	1.0982	0.808104	1.20854	0.273902	0.690879	0.916817	1.3229	0.460481	1.16514	0.339369
Axl	+	-1.7258	-0.631521	-0.361091	-0.0296897	-0.395048	-0.657473	0.0336933	-0.220592	-0.0957696	-0.243003	-0.437339	-0.270408	1.52123	1.55628	1.59218	1.37599	1.15455	1.01086	-0.565059	-0.873637	-0.943499	-0.315125	-0.800042	-1.16937	-1.14968	-1.03935	-1.12234	-0.846859	-0.186249	-0.928035	-0.996065	-0.491687	-0.777247	1.30509	1.58552	1.42939	1.21973	1.09926	1.17222	1.21598
B2m	+	0.741181	0.50696	1.59365	0.843286	0.758218	0.544397	1.57503	1.68509	1.26465	1.33541	1.48483	1.4306	0.509079	0.983124	1.2039	1.20903	0.334052	-0.0617368	-1.08566	-1.01632	-0.745709	-1.09912	-0.319965	-0.0435734	-0.34448	-0.337829	-0.90927	-0.928193	-0.902607	-0.790936	-0.933474	-0.967449	-0.867076	-0.978504	-0.977994	-0.944677	-1.38772	-1.11857	-0.385881	-0.855747
B3galnt1	+	0.906825	1.21822	0.928802	0.709016	0.998482	0.583094	1.08776	0.99745	1.01375	1.27395	1.31211	1.15534	-0.334433	-1.78801	0.0722429	0.27283	-0.891838	-0.0542119	0.410446	-0.0107822	-0.927596	-0.893016	-0.421792	-0.407936	-0.764418	-1.11634	0.985442	1.38839	0.560702	0.785155	0.312562	0.261749	0.102549	-1.18866	-0.951326	-1.37951	-1.64395	-1.41945	-1.6985	-1.4451
B3galnt2	+	1.36393	0.953647	1.14702	1.30995	0.724719	1.01976	0.913822	0.809087	0.428099	0.506934	0.856665	0.527316	-2.84804	0.615273	1.09669	1.2431	1.09	0.792473	-0.950989	-0.52063	-0.524192	-0.646804	-0.514201	-1.04837	-0.872537	-0.965637	-1.9018	-1.53836	-1.52942	-0.75837	-0.370189	0.464025	-0.452111	0.67423	-0.132786	0.270559	0.0931929	-0.199088	-0.682988	-0.443992
B3galt4	+	0.569712	0.529727	0.481714	0.708051	0.186954	0.374528	0.234703	0.554727	-0.0440668	-0.3896	-0.534848	-0.224081	-1.83408	0.725326	0.769729	0.724984	-1.88609	-1.92009	0.33865	0.203244	0.50993	0.372997	1.07164	0.635369	1.11398	0.961528	-0.220412	0.182395	0.210958	0.807356	0.568283	0.957272	0.8067	0.669412	-1.38874	-2.37912	0.442111	-2.27472	-1.861	-0.755127
B3galt6	+	0.163291	0.275011	1.36076	1.7187	0.0453102	0.928867	0.902416	1.09991	-1.20621	-0.19274	-0.118725	-0.452923	-1.23348	-0.95296	1.62127	1.25552	1.19541	0.431256	-0.93722	-1.50835	-1.10587	-1.42888	-1.371	-0.738906	-0.465917	-1.10792	-0.859913	0.784711	-0.321158	-0.284808	-0.505015	0.0490014	-0.50386	1.33581	1.19012	1.55794	1.35292	-0.930713	-0.386395	-0.655252
B3gat3	+	-0.0790997	0.719658	0.350642	0.204312	-0.167798	0.521427	0.655668	0.736013	0.725754	0.980448	0.447576	0.623322	-0.0302243	1.07534	0.903068	1.31566	-0.0441548	-0.0194528	-0.484085	-0.659991	-0.316989	-0.250023	-0.100247	0.733704	0.368011	0.183442	-1.76495	-1.89406	-1.64467	-3.62034	-0.819483	0.491478	0.376851	0.909549	0.164778	0.588463	0.795807	0.0636917	-2.07304	0.0339485
B3glct	+	-1.38693	-1.67223	-1.49781	0.685251	-1.2715	-1.18192	-0.40269	-0.111413	-0.319239	0.213331	-0.419848	-0.734085	1.54	1.39735	1.22707	0.996656	0.866105	0.793266	-0.243966	-0.581722	-0.379746	-0.00107849	0.513851	0.603571	0.153185	0.622717	-1.41461	-1.77926	-1.30891	0.566239	-1.21728	0.460054	0.623561	0.924329	0.97967	2.20612	1.08332	-0.747672	0.0311975	0.185066
B4galnt1	+	0.784299	0.867671	0.69537	0.501242	0.856985	0.855631	1.24469	1.10494	1.28965	1.25033	1.24121	1.2218	-0.15923	-0.132824	-0.0696151	-0.0337523	-0.683309	-0.675035	0.443185	0.533028	0.30779	0.28958	0.264256	-0.0881293	-0.346228	0.0506431	-0.202076	-0.0803666	-0.0448801	-0.349024	-0.308759	0.365358	0.309901	-0.898818	-1.94205	-0.553498	-0.392278	-2.83645	-2.21441	-2.46682
B4galnt4	+	0.117798	-0.483478	-0.662228	-0.221209	-0.90776	-1.28648	-1.45507	-1.86715	-0.509383	-1.19517	-1.26805	-0.423149	-1.03512	-1.37556	-2.03655	0.591891	-0.539806	-0.319292	0.387652	0.391644	0.810495	0.818922	0.72551	1.10956	1.35035	0.519533	-0.503871	-0.0685458	-0.596993	0.524195	0.476394	0.682887	1.74812	0.842031	0.837206	1.50475	1.23009	0.104384	0.104647	1.87681
B4galt1	+	0.655022	0.574054	1.29017	1.1381	-0.0718379	0.162875	0.809308	-0.0362919	-0.434797	-0.146316	-0.0412876	-0.358284	1.39196	0.990627	1.93803	1.758	1.05662	1.41463	-0.550047	-0.487894	-0.340722	-0.728206	-0.651082	-0.580284	0.0620199	4.09351e-05	-1.52697	-1.71121	-1.71248	-0.464882	-1.07977	-1.77167	-0.583181	0.0774719	0.89495	1.00146	1.08718	-0.874305	-0.691043	-1.45996
B4galt3	+	-0.841975	-0.288192	-1.30704	-0.657964	0.154079	-1.15796	0.704186	0.697327	0.727801	0.649246	0.701453	0.564881	1.25079	0.994945	1.42969	1.02169	0.687638	0.598001	-1.67433	1.17132	-1.09932	-0.972965	-1.42243	-1.63356	-0.230472	0.417184	0.109711	-1.45779	-1.38575	-0.778111	-0.722355	-0.124472	-0.998179	1.61941	1.67647	0.685546	1.34239	-0.0660844	0.165011	-0.549828
B4gat1	+	1.07649	1.11956	0.694065	-0.230115	1.29367	1.09429	1.18811	1.59288	1.22645	1.23213	1.52165	1.8324	0.237023	0.229112	-0.400071	0.558132	0.451904	-0.929723	-0.00398639	-0.705171	-0.376836	-1.33989	-2.27572	-1.58117	-0.555115	0.077991	0.0876254	-0.269007	-0.241034	-0.588086	0.0192098	-1.53537	-1.18161	-0.37077	0.483287	-0.588014	-1.18509	0.315217	-0.823874	-1.15054
Babam1	+	-0.23063	-0.343093	-0.854953	-0.523876	-0.301632	-0.133356	-0.135292	-0.167707	-0.0358918	0.157123	-0.391049	-0.200149	-1.64265	-1.58194	-2.33455	-2.05518	-1.44783	-1.52149	1.30272	1.17717	1.23915	1.1434	1.14586	0.813714	0.921515	0.724434	0.904682	1.10986	0.90256	0.883585	0.821296	1.09469	1.38273	-0.378999	-0.420464	-0.640826	-0.782003	0.0459671	0.0162217	0.336874
Babam2	+	-0.107516	-0.109012	-0.0648689	-0.0929082	-0.0647466	-0.186705	-0.329252	-0.831768	-0.4243	-0.0792938	-0.867079	-0.769766	-1.46332	-1.95455	-2.1065	-2.07653	-1.25082	-1.35589	0.810428	0.674386	1.19533	1.24974	1.13416	1.21299	1.43341	1.48878	-0.0931567	-0.105361	-0.0210073	0.557667	0.747823	1.33987	1.37932	-0.334373	-0.688753	-0.410906	0.151734	0.691618	0.967942	0.753192
Bace1	+	-0.527318	-0.56208	-1.24174	-0.74122	-0.236813	-0.981436	0.67439	0.790379	0.480111	0.763867	0.969367	0.307023	2.25818	1.0254	1.45995	1.42566	1.00379	0.488979	-0.302714	-0.819437	-0.218241	-0.448233	0.177261	-1.01831	-1.64341	-1.06403	-1.11234	-1.3425	-1.18298	-1.21542	-0.703745	-1.24076	-0.503768	1.37359	0.358291	1.41806	0.581253	0.998444	-0.490319	1.04281
Bach1	+	-1.62632	0.0408398	-1.0715	-0.953743	0.0262671	-0.448463	-0.838498	-0.491824	-1.04531	-1.94745	-0.977806	-1.47864	-0.909383	-0.236867	-1.38627	-0.668561	-0.370445	0.11797	0.796026	1.17845	1.10645	0.483493	1.08398	0.794857	0.565631	1.17319	0.823968	1.84052	0.915841	-0.538867	0.867634	1.47627	0.469528	-0.779608	1.15973	-0.517007	-1.26388	1.13661	1.03153	0.461659
Bag1	+	-1.24152	0.261948	-1.75976	-1.17714	-0.930698	-1.09491	-1.26739	-0.744236	-0.463127	-1.30591	-1.20902	-1.31244	-1.64522	-1.07315	-0.340052	-0.280528	-0.132483	-1.09046	0.48883	0.737451	0.557546	0.37398	0.67406	0.41215	0.5304	0.20532	0.66537	0.421045	-0.0560567	0.584354	0.234222	1.1026	1.06948	0.601367	1.65409	1.86836	0.50895	1.43182	1.59983	1.14093
Bag2	+	-0.461045	-0.244641	0.400319	1.16389	0.392803	-0.097476	0.110521	-0.157487	0.793824	0.785277	0.12579	-0.169395	1.63721	1.44652	1.85105	1.60034	1.02595	0.894518	-0.987135	-0.841602	-0.32096	-0.395629	-0.752747	-0.834697	-0.573341	-0.301081	-1.61201	-1.27359	-1.82735	-1.95637	-1.70975	-0.574712	-0.52756	0.293244	-0.518027	1.49857	0.909307	-0.119982	1.0109	0.316553
Bag3	+	-0.765216	-0.653466	-1.67423	-0.496122	-0.52624	-0.787042	-0.240723	-0.736894	-0.623809	0.0163162	-0.259917	-0.0389616	-1.03067	-1.06763	-0.718915	-0.778065	-0.0713487	-0.434174	0.0858491	0.171594	-0.159183	-0.0372588	0.12331	0.101418	0.356523	0.0613218	-0.127402	-0.0138676	0.0914764	-0.0359718	-0.0543819	-0.678462	-0.870936	2.04851	2.25591	0.07054	0.00869479	2.53284	2.5374	2.41919
Bag5	+	-2.66227	-1.11706	-1.26718	-1.0145	-1.30458	-1.85687	-1.37057	-0.703749	-1.48947	-1.32201	-0.945898	-0.854587	0.707747	0.333738	0.17063	0.818024	0.820944	-0.109784	0.839784	-0.310955	-0.0191743	-0.0143261	0.697339	0.366334	1.32777	1.12101	0.416147	0.51962	0.113103	1.19337	0.939849	0.674144	1.31341	0.377137	0.628258	0.552632	-0.163383	1.28038	0.375159	0.93986
Bag6	+	-0.75527	-0.689928	-0.152988	-0.323666	-0.698507	-0.549063	-0.271462	-0.244252	-0.705645	-0.402938	-0.385306	-0.395218	-1.82694	-1.87342	-1.75082	-1.90887	-0.532088	-0.5626	0.494854	0.353835	-0.149251	-0.0887917	0.0778147	0.084789	-0.12945	0.579261	1.02161	1.26251	1.28593	0.639985	0.821004	-0.461823	-0.821158	1.41247	1.07004	0.481399	0.271654	1.94477	1.87585	2.00167
Bahd1	+	1.05768	1.4743	0.856387	1.03128	1.42231	1.68312	1.07123	1.17936	1.04731	1.13264	1.37826	1.14815	1.04938	-0.829203	-1.72069	-0.781099	-0.954104	-0.571953	-0.730079	-0.629193	-1.08409	-1.73442	0.0111873	-0.179153	-0.385778	-2.38126	-1.00918	-0.035584	0.470184	-0.452713	-0.478357	-0.337572	-0.380902	-0.824684	0.155201	-0.494882	-0.167311	-0.470293	0.475421	-0.0109138
Baiap2	+	0.698667	0.748391	0.638477	0.718539	0.693963	0.647116	0.592148	0.551408	0.638238	0.518966	0.616125	0.675585	-1.41107	-1.42586	-1.97207	-1.91987	-1.10206	-1.06043	0.820896	0.846483	0.77213	0.717275	0.71688	0.985796	0.906194	0.874769	0.577781	0.539405	0.561502	0.482747	0.550655	0.506857	0.5484	-1.23373	-1.64292	-1.13786	-1.25245	-1.38707	-1.41426	-1.18574
Baiap2l1	+	0.955808	0.794184	0.590973	0.6977	0.68843	0.764273	0.426782	0.428435	0.288321	0.372437	0.609069	0.496046	-1.12139	-1.44819	-1.31113	-1.83812	-1.20036	-1.5407	0.724875	0.567624	0.600849	0.64538	0.415231	0.897626	0.838233	0.866439	1.04956	0.937867	0.933262	1.00374	0.887556	-0.0101768	-0.347668	-1.30635	-2.57955	-1.1693	-1.19408	-0.470348	-1.00007	-0.943272
Bak1	+	1.12753	0.981077	0.169892	-0.0736881	0.907882	0.858466	1.23923	1.17696	1.38243	1.12765	1.55355	1.62585	1.00411	0.906886	1.14354	0.875949	0.0950226	0.00983491	0.106879	0.127598	-0.544098	-0.339626	-0.285475	-0.243161	-0.202895	-0.385576	-1.3988	-1.16636	-1.18023	-1.3189	-1.5817	0.0261759	-0.154877	-0.145268	-0.604388	-1.56308	-0.654896	-1.40208	-1.62296	-1.57846
Banf1	+	1.14762	1.33008	1.65246	1.48694	1.12836	1.16366	1.70204	1.71687	0.972901	1.01337	1.00379	1.04576	-1.24112	-1.01477	-0.499236	-0.630224	-0.927646	-1.05451	-0.321639	-0.103183	-0.180994	0.0311523	-0.18695	-1.27321	-1.1765	-1.33925	-0.059109	0.215551	0.462398	0.0299065	0.415463	-0.163808	-0.177589	-1.03447	-1.31232	-1.49339	-1.59068	-0.37405	-0.199078	-0.164598
Banp	+	1.57418	1.80427	1.30193	1.85526	1.23665	1.4562	0.974364	1.15372	1.01028	0.789238	0.753519	0.790606	0.409637	0.614824	0.476982	0.206248	0.0930089	0.405276	-0.397078	-0.493232	-0.724541	-0.161644	-0.639712	-1.17137	-1.28889	-1.42603	-0.353885	-0.924781	-0.0357684	-0.661797	-1.08753	-0.622757	-0.506587	-0.662037	-1.65898	-0.46845	-0.110443	-0.547831	-2.02344	-0.939392
Bard1	+	1.20786	1.36482	1.26264	1.36024	0.652473	1.33057	0.530489	0.405016	0.989198	0.202471	0.230424	1.17438	-1.76813	-1.12635	-1.01635	-1.63215	-0.453916	-1.97166	0.24114	-0.262019	-0.343659	0.208158	-0.452102	0.548482	0.41848	-0.163885	0.711219	0.639434	0.700682	1.11573	0.910015	-0.173258	0.35737	-2.03583	-1.56425	-0.678346	-0.927127	0.164559	-0.906511	-1.25031
Basp1	+	0.479299	0.461869	0.496752	0.504264	0.477199	0.455205	1.04594	0.9771	0.906576	0.819826	0.610391	0.634868	0.639255	0.814729	1.03626	1.03727	0.797662	0.964574	-0.520841	-0.679917	-1.15563	-1.15546	-1.12537	-1.77743	-1.76026	-2.17527	-0.515849	-0.588913	-0.876615	-0.700929	-0.678138	-1.51416	-1.31228	-0.422018	-0.106808	-0.306661	-0.100681	1.48588	1.36386	1.46447
Bax	+	0.293469	0.376329	0.572824	0.419387	0.445666	0.340707	0.368265	0.494848	0.15851	-0.0430692	0.224874	0.300155	-1.58431	-1.64515	-1.30809	-1.3595	-0.580309	-0.820444	0.883686	0.964034	0.418907	0.722609	0.432194	0.297155	0.0962627	0.291082	1.17874	1.10142	1.12362	0.419399	0.646203	0.72612	0.854621	-2.37411	-1.50727	-2.90247	-1.44949	0.39816	0.579442	0.445532
Baz1a	+	1.55037	1.61911	1.49697	1.53163	1.64395	1.54092	1.04943	1.01129	0.947019	0.932096	1.00265	1.04243	-0.72263	-0.974353	-1.35577	-1.39835	-0.797285	-0.572506	-0.145007	-0.00370839	-0.199319	-0.168782	-0.0966648	-0.187764	-0.151684	-0.0478829	-0.573283	-0.249416	-0.373938	0.00223773	-0.222687	0.528074	0.360148	-0.513257	-0.389238	-1.44274	-0.916879	-1.80112	-1.54202	-1.41205
Baz1b	+	1.33314	1.35438	1.43145	1.48759	1.48701	1.40417	0.982616	0.993931	0.699357	0.739734	0.693498	0.896549	0.533495	0.603125	0.355153	0.443205	1.03149	1.00634	-0.984361	-0.975016	-1.14251	-1.15188	-1.2343	-1.35482	-1.25757	-1.39636	-1.17738	-1.039	-0.968703	-0.556684	-0.660776	-0.0449577	0.0461475	-0.0357518	-0.132706	-0.115939	0.117944	-1.28881	-1.24039	-0.882399
Baz2a	+	1.20365	1.13004	1.23254	1.27993	1.06818	1.11061	0.841163	0.861175	0.677221	0.627503	0.677913	0.758896	-1.44778	-1.51671	-0.901328	-1.35185	-0.946318	-0.483088	0.49816	0.176877	0.431021	0.333395	0.397584	0.390059	0.465392	0.391113	0.00878251	0.00224818	0.111821	0.134453	0.0175093	0.62722	0.648184	0.0978357	-1.35005	-0.975888	-0.99546	-2.44162	-2.22596	-1.56444
Bcap29	+	1.15761	1.23793	0.613994	0.565108	0.872506	0.89099	0.817019	0.724676	0.954557	1.00595	0.888913	0.850522	0.76232	0.664882	0.224512	0.290573	0.131145	0.351692	0.0630534	-0.0893185	0.155293	-0.0156654	0.109846	0.495559	0.0193817	0.518402	-1.37853	-1.42504	-1.6108	-0.746957	-0.8601	0.682189	0.767464	-0.785348	-1.05303	-0.389562	-0.446932	-2.40891	-2.402	-2.2039
Bcap31	+	0.530742	0.507819	0.494169	0.309631	0.501509	0.547482	0.734224	0.737634	0.889902	0.833566	0.670198	0.760613	1.48689	1.53759	1.72342	1.57276	1.37445	1.17471	-0.73835	-0.408682	-0.847822	-0.870876	-0.869402	-1.01456	-1.02929	-0.858648	-1.32096	-1.2256	-1.03241	-1.59169	-1.67712	-0.445634	-0.718564	0.409361	0.232576	0.444512	0.553318	-1.05864	-1.11651	-1.20231
Bcar1	+	-0.577918	-3.37441	-0.6612	-0.41193	-0.717288	-1.95509	-0.306009	0.44097	-1.09886	-1.13859	0.475679	-0.723796	-0.665319	-0.768351	-1.72382	-0.914964	-0.182157	-0.712333	0.757733	0.67558	0.630295	0.7958	0.572095	0.784728	0.787364	0.818816	0.40361	0.504791	0.382401	0.521722	0.656073	0.747248	0.458835	0.660995	0.765505	0.048203	-0.202885	1.39138	1.38919	1.46591
Bcas2	+	0.523782	0.539057	0.655387	0.859383	0.7482	0.779933	0.953221	0.841668	0.613478	0.575326	0.396723	0.441556	0.127695	-0.107181	-0.162807	-0.592672	0.160541	-0.0820709	0.715337	0.569689	0.39602	0.523243	0.385662	-0.167227	-1.16124	-2.38927	0.692027	0.775984	0.681584	0.415914	0.0880515	0.194212	-0.0790999	-1.71707	-1.70483	-3.18692	-2.54463	0.175281	-0.27829	0.344356
Bcas3	+	-2.65729	-0.949237	0.150726	-0.0603467	-0.638928	-0.448991	-0.154154	0.235786	-0.109041	-0.618691	0.493928	-0.692631	-1.67007	0.546367	-0.957602	-2.67694	-1.11592	-1.38634	0.140616	0.122324	0.0608105	0.309783	0.126364	0.891783	0.348286	0.604897	0.316476	0.281625	-0.0565143	-0.206689	-0.0233647	-0.089788	0.574796	1.21807	1.08192	1.06029	1.13751	1.83735	1.4587	1.51415
Bcat1	+	-0.00199941	-0.0142094	0.0370321	0.0995579	0.0738903	0.0182929	-0.105255	0.113963	0.0997171	-0.0502098	0.203828	0.270498	-1.88539	-2.03198	-2.73615	-0.222314	-1.81865	-1.92678	0.986674	0.974844	0.69072	0.7563	0.665255	0.476166	0.425435	0.439562	1.16871	1.16704	1.17044	0.909768	0.857609	0.697833	0.774282	-0.397249	-0.31402	-0.492725	-2.21106	0.473288	0.323674	0.333616
Bcat2	+	1.53154	1.22829	1.34878	1.28379	1.08196	1.43412	1.38538	1.22753	0.918366	0.788309	1.34701	1.07175	0.0224017	0.100112	0.301596	0.517762	0.078876	0.0970016	-0.784951	-1.09938	-0.604978	-0.449017	-0.605333	0.23354	0.223845	-0.0318626	-1.61057	-1.32476	-1.34092	-1.13608	-1.43112	-0.0535485	-0.0765398	-0.101872	-0.551217	0.0231624	-0.348167	-1.65503	-1.68957	-1.35019
Bccip	+	-0.0562546	0.235032	0.140824	-0.00265421	0.26686	0.401389	0.0643027	0.132696	0.299922	0.155921	0.0185361	0.0415797	0.462951	-0.260761	-3.09881	-1.22627	-0.673172	-0.769411	0.869735	0.965057	0.81996	0.808881	0.732436	0.517613	0.413081	0.430673	0.536015	0.484369	0.398607	0.698447	0.810818	1.03109	0.922613	-0.81951	-3.46156	-1.77943	-1.44395	0.378623	0.268622	0.28513
Bckdha	+	0.120146	0.0942737	0.217199	0.357217	1.23073	0.796243	0.849949	1.02813	-0.498101	0.340498	0.384516	0.176836	0.71651	0.264555	0.435339	0.580586	-0.187323	-0.918601	0.0411577	-0.338302	-0.442653	-0.0800784	-0.62215	1.6828	-0.731118	0.0704209	-0.117121	0.706045	0.700226	-0.242668	-0.517531	0.5986	0.407963	-2.85338	0.887627	1.11885	0.491691	-2.23837	-1.62133	-2.88938
Bckdk	+	1.7621	0.4755	0.903562	1.03765	1.32553	1.33893	1.06797	1.58013	0.790466	0.274953	1.12554	0.590621	-0.143569	-0.868909	-0.536016	-0.494718	-0.732225	-0.341613	-0.427518	0.00444985	-0.678885	-0.929579	-1.02093	0.189894	-1.18013	-0.284902	-0.320084	-0.122672	-0.122684	-1.2173	-1.03289	-0.754002	0.896795	2.02005	1.09937	0.501742	-1.08701	-1.87195	-1.43735	-1.38032
Bcl10	+	-1.37877	0.644791	0.138695	0.590379	0.875917	0.827412	0.721406	0.590841	0.184549	0.718465	1.04768	1.16919	0.00692404	-2.18549	-1.29794	-2.4687	-1.07056	-0.62995	0.780669	0.836803	-1.56737	-0.137988	0.293296	-0.42306	-1.11596	-0.258991	1.01056	0.938263	1.18165	0.620519	0.194938	-0.0381837	0.263407	-1.64736	-0.967648	-1.09369	-0.256727	0.901387	0.99079	1.00985
Bcl11b	+	-0.305126	-0.766032	-0.875017	-1.20235	-3.06732	-1.42006	-0.0258335	-0.833034	-2.01182	-0.582875	-0.472665	-0.3032	0.157866	-0.670761	0.087048	-0.923828	1.55982	0.980895	-0.232229	-0.0785571	-0.109617	-0.343946	0.378917	0.0465937	1.64592	0.736521	0.411611	0.615935	1.22469	0.318324	0.593311	1.48912	1.18123	0.562894	1.36091	0.212986	0.785254	0.90025	-1.09836	0.0725155
Bcl2l1	+	-0.602213	-0.323544	-0.702806	0.0950805	-2.02249	-0.756478	-0.357865	-0.518249	-0.746144	-0.626106	-1.11393	-0.748846	0.00315873	-0.0782613	-0.235421	-0.703081	-0.248991	-0.938279	-0.971964	-0.637517	0.65008	0.56501	0.428644	1.314	1.33438	1.28348	-1.33568	-1.38712	-0.975511	-0.247595	-0.239788	0.028428	0.181258	1.29364	1.12726	1.80625	1.65413	1.63875	1.57084	1.54349
Bcl2l13	+	0.797933	1.1925	1.3411	0.964235	1.23457	1.17253	0.994511	1.09043	1.04211	1.32731	0.760133	1.15907	0.593445	0.749981	1.44971	0.773633	1.03039	0.748416	-0.438756	-0.475554	-0.750808	-0.719326	-0.651353	-0.621165	-0.328962	-0.469595	-0.120817	-0.554003	-0.481175	-1.1702	-1.11763	-1.04728	-1.07959	-1.16709	-0.869775	-0.965617	-0.737077	-1.8573	-1.17943	-1.61951
Bcl7a	+	-0.319536	0.634993	-0.580299	-0.207764	-1.42735	-0.166045	0.0169038	-0.824722	-0.282499	-0.183438	-0.463732	-1.0994	-1.33174	-0.854393	-0.0661139	-0.255011	-0.718192	0.0811657	-0.33176	-1.91201	-0.353182	-0.324857	-0.186857	1.62451	2.00958	1.71674	-0.588336	-0.376024	-0.701717	-1.15049	-0.246937	-0.704756	0.181375	1.74184	1.97392	1.51979	1.72497	0.795442	0.835612	0.800327
Bcl7b	+	0.298137	0.218835	0.406072	0.565547	0.434535	0.26078	0.39217	0.231795	0.560839	-0.0599951	0.368129	0.837501	1.09563	0.921668	1.04916	1.16211	1.88031	1.58593	-0.665022	-0.133405	-1.73171	-1.01937	-0.683283	-1.28393	-2.01972	-1.31352	0.228308	1.47939	1.508	-0.550106	-0.451535	-1.74596	-0.806208	-0.711355	0.621545	-1.61227	0.466044	-0.509518	-1.01699	-0.25853
Bcl7c	+	1.32944	1.11325	1.24854	1.8969	-0.00690715	0.769656	1.00051	0.765064	0.764954	-0.023877	0.225697	0.389352	0.316908	0.617085	0.841556	0.283138	0.961081	1.17517	-0.939472	-1.61417	-1.38271	-1.35311	-1.27683	-0.252566	-0.942726	-1.34103	-1.87506	-1.20306	-1.61539	0.0128523	-1.64317	-0.637918	-0.347826	0.403984	0.626732	-0.0776587	1.06261	0.310664	0.151066	0.267262
Bclaf1	+	1.30276	1.45101	1.85154	1.53907	1.15493	0.925397	0.646453	0.515117	0.775671	0.725305	0.505606	0.59138	0.7142	0.773732	0.606491	0.60857	0.810862	0.796089	-0.678332	-0.784766	-0.312549	-0.364172	-0.427307	0.249829	0.247048	0.0285034	-1.35391	-1.65983	-1.18621	-0.667712	-0.970531	0.245536	0.405889	-1.06455	-1.10606	-1.94626	-1.30524	-0.887022	-1.3911	-1.36543
Bcor	+	1.52208	1.77129	1.19885	1.22222	0.804155	1.23277	1.02112	0.960913	0.974833	1.15359	0.981379	0.842501	0.0684788	0.113996	-0.547238	-0.542561	0.428119	0.675159	-0.091431	-0.337206	-1.18123	-0.435367	-0.894875	-0.939106	-2.12307	-0.692153	0.0611408	0.107532	0.18686	0.0199098	0.360518	-0.0932055	0.120291	-1.69751	0.567917	-1.06354	-1.61061	-1.23011	-1.49444	-1.42198
Bcorl1	+	0.807917	1.00163	0.938707	1.04491	0.954271	0.930353	0.790634	0.694153	0.512809	0.84762	0.639241	0.777553	-1.20319	-1.15787	0.506288	-1.06991	-0.849803	-0.811403	-0.859611	0.63248	-1.51239	0.329116	0.511759	-1.25178	-1.24701	-1.15314	0.997579	0.54537	1.01073	0.290093	0.633217	0.359957	0.815695	0.699194	-0.551597	-1.79971	-1.19682	-1.52989	-2.07084	0.993697
Bcr	+	-0.476217	-0.306146	-0.336525	0.122654	-0.750884	-0.488138	-0.190939	-0.168406	-0.572266	-0.686019	-1.01892	-0.0240138	-1.33533	-1.8505	-2.26406	-1.32722	-2.07837	-1.97146	0.748188	0.837054	0.94057	1.05013	0.906418	1.15986	1.40891	1.22805	0.499534	0.36263	0.462041	0.699645	0.533009	0.849512	1.20711	1.03341	-0.0817738	-0.232837	-0.242696	0.842032	0.595416	0.916546
Bcs1l	+	1.45663	1.53606	1.75659	1.69931	1.07296	1.16145	1.11986	1.19386	0.820228	1.10624	0.836244	0.884543	-0.274738	-0.706658	-0.213105	-0.101291	-0.623651	-1.08043	-0.183558	-0.980073	-0.521258	-0.301202	-0.548905	-0.121746	-0.256219	-0.564055	-1.02978	-1.07578	-1.49988	-0.476627	-0.569706	1.03294	1.46292	-0.0294369	-1.09929	-0.198762	-0.41117	-1.3823	-1.36507	-1.52513
Bdh1	+	0.851678	0.693168	0.598553	0.674799	0.565576	0.713049	0.923562	1.08181	1.21547	1.16037	1.18667	1.05605	-0.66467	-0.399691	0.419647	0.323328	-0.566653	-0.984293	0.682843	0.612131	0.664899	0.618999	0.53784	0.197252	0.651081	0.395199	-0.525551	-0.486814	-0.269116	-0.281351	-0.36189	0.21032	0.0286778	-2.64818	-2.97923	-1.40675	-1.4964	-0.985445	-1.22984	-0.777105
Becn1	+	0.128005	0.660922	0.67724	0.53042	0.31558	0.311545	0.471948	0.525921	0.112764	0.157698	0.13505	-2.16734	-2.62715	-2.79124	0.320562	0.276661	-1.83454	0.309091	0.34542	0.59443	0.422531	0.474639	0.548711	0.491584	0.487144	-0.116857	0.400476	0.731801	0.613549	0.437068	0.521754	0.319757	0.593228	-0.438375	-2.14482	-2.01882	0.129277	0.688345	0.609916	0.796109
Bend3	+	0.999433	1.14029	0.904122	1.10868	1.0553	1.30638	0.569427	0.602228	0.474649	0.570237	0.441618	0.603789	0.277331	0.556468	-0.912003	-0.484867	0.691797	-0.079243	0.310751	-0.284985	-1.77693	1.07382	-0.26046	-0.970755	-1.68296	-1.62421	0.853094	0.746351	0.54615	0.477978	0.585864	0.554448	0.577941	-1.70523	-0.712258	-2.63676	-0.757438	-0.799888	-1.25445	-1.0857
Bet1l	+	-0.132373	0.204499	0.453551	0.0873023	-0.937135	-0.111661	0.220776	0.131331	-0.122877	-0.523632	-0.281472	-0.131264	0.99166	1.09273	2.32154	2.37014	2.25588	1.9385	-1.54035	-0.905299	-0.0959825	-0.280975	-0.406264	-0.144575	-0.556634	-0.572444	-1.72958	-1.06619	-1.78422	-0.67949	-1.1751	0.219878	0.217106	-0.166633	-0.209004	-0.709205	-0.230046	0.595402	0.539237	0.852862
Bfar	+	0.334847	0.384092	-0.356246	0.635335	0.81545	-0.08885	-0.137825	0.54684	0.411529	0.665993	-0.119906	0.520451	1.15512	1.325	1.40795	1.52221	-0.00113561	0.399853	-0.920317	-1.42412	-0.715072	-1.02653	0.974122	-0.221884	0.713835	-0.036213	-2.13093	-2.00798	-0.469482	-0.964538	-2.3362	0.423467	0.0731882	1.01417	-1.39549	-1.10694	0.802525	1.57455	0.10612	-0.346998
Bgn	+	-0.507748	0.0632686	-0.0842347	-0.272267	-0.129101	-0.355333	0.340116	0.193175	0.0140395	0.0655262	0.271805	0.125136	1.41562	1.41186	1.59436	1.70589	1.34398	0.992493	-0.609747	-1.06276	-0.930904	-1.42974	-0.944178	-1.79584	-1.84982	-2.11534	-0.649925	-0.679072	-0.835279	-1.13197	-1.12675	0.775771	0.812147	0.86468	0.634205	0.767191	0.63239	0.898901	0.768476	0.818988
Bicd1	+	-0.239054	0.0412567	0.0844283	0.196093	0.0719458	0.242349	0.151293	0.265271	-0.315506	0.299007	0.486132	-0.385872	-1.9086	-0.976204	-1.39304	-1.91383	-0.055306	-0.882556	0.470795	1.22457	0.944153	1.45238	1.25857	0.810583	0.750191	1.01506	0.485728	0.636508	0.386412	0.59539	0.784202	1.14884	1.38456	-2.04174	-1.55561	-0.358361	-0.765084	-2.45516	0.416274	-0.356051
Bicd2	+	-1.33679	-1.36629	-1.55105	-1.67402	-1.42259	-1.94109	-0.718383	-0.480783	-1.03408	-0.935058	-0.994118	-0.7932	0.0994909	-0.510506	-0.601158	-0.773343	-0.447049	0.0294369	1.0934	1.11199	0.591659	0.668281	0.951558	0.57118	0.905876	0.722984	0.1187	0.457006	0.378906	0.239362	0.242057	0.668756	0.645739	0.775244	-0.00880225	0.191503	0.493925	1.92248	1.82189	1.88687
Bid	+	-0.191909	1.69583	-1.17401	0.34411	-1.4971	0.819789	0.332806	-0.350353	-0.956829	-0.203578	-0.514882	-2.93668	-2.15588	0.950803	0.217526	-0.173177	-0.265829	1.36246	1.17813	0.489222	1.14734	-0.404572	0.058557	-0.458948	1.43246	0.849575	0.663043	0.987324	0.747794	0.646374	-0.526305	1.11991	-0.632779	0.20324	0.419745	-0.375179	-0.101045	-0.304835	-0.921201	-1.52093
Bin1	+	-0.611529	-0.889534	-0.789082	-0.699659	-0.690624	-0.763254	-0.538709	-0.492233	-0.688096	-0.61945	-0.501965	-0.395215	-1.53537	-1.48043	-1.7979	-1.63558	-1.19808	-1.22267	1.26861	1.18906	1.04833	1.099	1.07211	1.00334	1.05	1.1545	1.03656	0.969059	0.626585	1.14321	1.07003	0.508172	0.55341	-0.381799	-0.305241	-0.828418	-0.25327	1.17692	1.18814	1.16107
Bin3	+	-1.18292	-0.123176	-1.36913	-1.88667	0.856372	-0.376252	-0.169908	-0.235588	-1.03959	-0.652238	-0.387136	-0.281458	0.0530939	-0.0750558	0.77623	-0.858842	-1.68479	0.039378	0.48675	-0.202864	0.0366807	0.530314	-0.166386	0.107093	-0.0950962	-0.0895046	0.961702	1.11943	1.18876	0.582991	0.442484	-1.0336	-1.73419	1.30309	1.04901	-1.96425	0.896752	1.63556	1.90683	1.63611
Birc6	+	0.0230489	-0.0429363	-0.0541334	-0.000629356	-0.320341	-0.189584	-0.376834	-0.187812	-0.250735	-0.173327	-0.281414	-0.334995	-2.00715	-1.93485	-2.38479	-2.39335	-1.42484	-1.64656	1.04392	1.08404	0.941401	0.910882	1.01731	0.940782	0.983869	0.927996	0.935206	0.910869	0.890575	1.01145	1.11334	0.757994	0.736752	0.00813123	-0.173202	-0.599074	-0.40863	0.350491	0.274201	0.322931
Bles03	+	-0.86119	-0.670846	-0.57843	-0.659435	-0.666888	0.226286	-0.183267	-0.27404	-0.628502	-0.250075	0.296735	0.263531	-0.524885	-0.491155	-0.636509	-0.644397	-0.809001	-0.678776	1.08164	1.4748	1.05042	1.06443	1.56025	0.588948	0.561854	0.429121	-0.578822	-0.000629863	0.0372652	0.487616	0.314275	1.11749	1.48058	-2.26414	-2.93215	0.0682726	-1.43746	1.33821	0.948589	1.38028
Blm	+	1.51802	1.39431	1.25429	1.43837	1.37861	1.34433	0.612938	0.652699	0.841465	0.738699	0.596418	0.92467	-1.48343	-0.868891	-2.75424	-1.51397	-0.813777	0.00492207	0.0658303	-0.0933955	-0.208899	-0.462304	0.153272	-0.713932	0.139218	-0.814855	0.1634	0.475176	0.705061	0.512468	0.538267	0.15845	0.132432	0.3893	-1.46274	-0.618299	-1.46765	-1.36587	-0.698018	-0.79233
Blmh	+	-0.537999	-0.386364	-0.807729	-0.829514	-0.711066	-0.757819	-0.550446	-0.589325	-0.436553	-0.253476	-0.549861	-0.353121	-1.38306	-1.17963	-1.8701	-1.96293	-1.43752	-1.37652	1.10459	1.1673	1.07377	1.14995	1.13572	1.16208	1.30404	1.24501	0.852477	0.779039	0.745432	1.07585	0.989531	1.22803	1.26529	-0.198023	-0.306902	-0.612409	-0.831751	0.477792	0.572442	0.593763
Bloc1s3	+	-2.31552	0.520895	-0.759665	-1.36905	1.08852	0.976958	0.993667	0.891656	0.537862	0.484165	0.317307	0.104937	0.27682	-0.16937	-1.77383	0.829068	-1.87829	0.597526	0.624579	0.788901	0.251035	0.338918	0.0634309	-0.784372	-0.289225	-1.69302	1.37275	1.49215	1.30073	1.31768	0.100767	0.52611	-0.731926	-0.782032	-1.53164	-1.39428	-0.661236	0.102538	-0.0173718	0.251855
Bltp2	+	0.605609	0.943555	0.855712	1.07164	1.02068	1.11822	0.847813	0.736703	0.781581	0.746662	0.738901	0.260024	0.172939	0.26133	0.610673	0.0420048	-0.76454	-1.06026	0.0204322	0.513672	-1.55161	-1.14389	-2.40399	-1.54488	-1.48784	-0.304379	0.601328	0.5736	0.545654	-0.972585	0.826777	0.660939	0.771835	-1.77791	-1.74074	-1.82017	-0.168216	0.308334	0.601376	0.503033
Bltp3b	+	-0.767315	-1.21281	-0.306607	-0.798757	-0.695372	-0.733196	-1.27278	-0.836334	-0.801633	-1.63827	-1.78735	-1.16753	-0.79546	-0.546866	-1.31629	-0.9709	-0.634593	-0.28824	0.480454	0.690444	0.990971	1.13451	1.16913	1.28463	0.820138	0.754619	-0.00657244	-0.051103	0.128263	-0.159946	-0.0949051	1.66686	1.25727	0.256212	-0.250705	0.825407	0.948881	1.8078	1.51507	1.40288
Blvra	+	-0.40553	-0.324078	-0.25161	-0.170341	-0.477248	-0.297219	-0.182036	-0.208096	-0.24644	-0.503827	-0.388389	-0.306461	-2.48753	-2.23365	-1.87921	-1.78216	-1.32447	-0.893785	1.12558	1.18891	1.27077	1.13457	1.14175	1.11449	1.2745	1.17124	0.609194	0.568109	0.507735	0.884067	0.800079	0.980653	1.12807	-0.346056	-0.447306	-0.567371	-0.5209	0.416368	0.464249	0.463394
Blvrb	+	-0.332853	0.772797	-1.15708	-1.44553	-0.347111	-0.0130938	-0.000641825	0.458839	0.475147	-0.15114	0.42601	0.451248	-1.13792	-0.415852	-1.93295	-2.31807	-2.22055	-1.27435	1.17373	1.40625	0.963006	0.687569	0.799494	0.968776	1.01995	0.13575	0.440652	0.441914	0.242003	0.369957	0.383393	0.054687	0.191399	-0.41084	-0.333368	-1.47528	-0.882508	1.13557	1.34111	1.50989
Bmp1	+	0.670454	0.634581	0.776823	0.771859	0.63181	0.659347	1.12214	1.13872	1.14124	1.09012	1.07142	1.01461	0.675871	0.724802	0.987688	0.952927	0.208803	0.24167	-0.845473	-0.6004	-0.803875	-0.823861	-0.475544	-0.483466	-0.693416	-0.172005	-1.29575	-1.32351	-3.33097	-0.927746	-2.53258	-0.370937	-0.345805	0.167071	0.057865	0.490731	0.336338	-0.24971	-0.19225	-0.0995738
Bmp2k	+	-0.00628476	0.243769	0.643024	0.0777194	0.801655	-0.068442	-0.0916202	0.0791437	0.933097	-0.210371	0.700531	0.288765	2.06982	1.87204	1.32528	0.739545	0.61752	1.98199	-1.58605	-0.86736	-0.739749	-0.521658	-2.92772	-0.262768	-1.41857	-1.54637	-1.32972	-0.475743	-0.856727	-0.509822	-0.935255	0.0341651	0.0520008	0.122739	0.0778764	0.676259	0.59072	0.25986	-0.091504	0.258215
Bmpr2	+	0.736943	0.906444	0.71053	1.13031	0.465613	0.695435	0.966006	0.944466	0.654701	0.655161	0.922767	0.813663	0.224673	0.709067	0.767709	0.431791	0.262083	-0.255054	0.0671219	0.131414	-0.0555345	-0.649224	-0.218559	-0.735209	-0.715454	-0.106694	-0.211239	-0.0626933	-0.046218	-0.461044	-1.11833	-0.443295	0.256371	-0.988122	-2.45101	-4.27772	-0.294896	0.397764	0.668854	-0.4286
Bms1	+	1.45892	1.38464	1.41633	1.36676	1.39278	1.29284	1.11206	1.16145	0.962878	0.917356	1.08407	0.861646	-1.03324	-0.741917	-1.13178	-0.884819	-1.10668	-1.01191	0.210036	0.239825	0.258598	0.190281	0.138857	0.184067	0.224007	0.089597	-0.276114	-0.336137	-0.708982	0.165202	0.1453	0.390148	0.35815	-1.2522	-1.63067	-1.15039	-1.25305	-1.73424	-1.44803	-1.30562
Bnip1	+	1.41281	1.15987	0.790589	0.119939	0.660665	0.534158	0.125676	0.863878	0.318164	0.44278	0.379075	0.622802	1.53988	1.27879	1.88926	0.937719	1.38099	0.499874	-1.38458	-1.10865	-1.15924	-1.20288	-1.40864	-0.422207	-0.713891	-0.752444	-0.260115	-1.31074	-1.75662	-0.808373	-1.06256	0.00504896	-0.199632	-0.311419	0.690698	0.938265	0.779984	-0.972445	-1.26813	-1.26836
Bnip2	+	-0.527012	-0.494692	-0.844447	-0.432207	-0.624324	0.221538	-0.102898	-0.0587729	-0.443629	-1.69392	-0.221335	-0.901426	-1.84459	0.282342	-3.27948	-0.391043	-0.972809	-0.706885	0.12819	0.0538846	0.12735	0.250467	0.295411	0.745678	0.592047	0.741224	-0.263544	-0.0980184	-0.366216	0.308745	0.0959811	0.46091	-0.145638	1.34565	1.26771	1.23744	1.00165	1.76103	1.79596	1.69967
Bnip3l	+	-1.0947	-2.17354	0.0662929	0.307703	-0.772709	0.595896	-1.23829	0.132387	-0.985313	0.356613	0.893979	-1.40892	0.294717	1.46369	0.763813	0.501057	0.905626	1.23219	0.857931	0.80389	-0.262003	-0.135644	-0.0584939	0.810305	1.47095	1.19967	-0.855505	-1.6387	-0.455677	-1.8923	-1.19498	-0.877228	-1.71854	-0.097316	1.00877	0.587962	0.552074	0.741802	0.576422	0.736131
Bod1l	+	-0.927558	-0.222616	-0.724662	-0.280196	-1.44593	-0.921516	-1.14764	-0.6901	-0.905911	-0.332212	-1.16665	-0.761732	1.58179	2.14826	0.431863	0.0832047	1.3116	1.38038	-0.0437942	-0.283263	-0.483021	0.109654	-0.389051	-0.593064	-0.409368	0.301249	-1.99847	-0.883502	-0.616691	-0.619777	-0.246741	0.0693656	-0.0547295	0.930548	0.594033	1.23674	0.867028	1.52839	1.67516	1.89893
Bola1	+	0.640527	0.961738	0.950673	0.575226	-0.491843	0.491548	0.716352	0.59962	0.729623	-0.196408	0.549527	0.682179	-1.29591	-1.62531	-0.808445	-0.876627	-0.171671	-1.21291	0.59813	0.704066	0.458405	0.407306	0.0331515	-0.16025	-0.325366	0.0159343	1.1893	1.22044	1.24706	0.982578	0.893933	0.21756	0.449811	-1.01897	-1.40064	-3.29063	-2.19207	-0.0880119	-0.046302	-0.113321
Bola2	+	0.00396934	0.182175	-0.091311	0.0975897	-0.00975815	0.0963243	0.203033	0.259923	-0.0331275	0.144143	0.147281	0.195756	-1.84016	-1.42499	-1.86908	-1.64372	-1.32245	-1.52022	0.948414	0.913223	0.905465	0.854783	0.867875	0.484712	0.406245	0.369682	0.89674	1.00832	1.14287	0.931929	1.03303	0.66076	0.669248	-1.0944	-0.931694	-1.98853	-2.1191	0.932704	0.740231	0.792107
Bola3	+	0.520424	0.450979	0.407394	0.363002	0.49418	0.594743	0.746676	0.853576	0.585618	0.759217	0.817432	0.857384	0.779658	0.886688	1.19241	1.13263	0.739798	0.634086	0.291741	0.434923	0.175761	0.55339	-0.0867549	-1.46601	-1.7271	-2.01796	-0.870315	1.32432	-0.240103	-0.223995	-0.292152	0.00640674	0.233022	-1.29237	-1.43917	-3.20217	-0.704827	-0.425365	-1.0016	-0.845558
Bop1	+	1.36555	1.31979	1.07745	1.12939	1.53286	1.39801	1.1421	1.09696	1.18972	1.4082	1.23504	1.05306	-0.673277	-0.711615	-1.14953	-1.36302	-0.857018	-0.896848	0.453285	0.104065	-0.230783	-0.0529765	-0.02828	-0.349746	-0.443967	-0.233837	0.220969	0.0828524	-0.0838037	0.0572452	0.0918262	0.000359193	0.14892	-0.639025	-1.23284	-0.884291	-0.7385	-1.55134	-2.19436	-1.79259
Bphl	+	0.326074	0.218948	0.00405735	0.687082	0.112292	0.625313	0.517134	0.66971	1.0728	0.984712	0.985801	1.01468	1.29683	0.935624	1.43297	1.32786	0.681486	0.740828	-0.0544336	0.0624211	-0.502597	-0.729717	-0.357389	0.187352	-0.444849	-0.574259	-1.63366	-0.39284	-1.165	-2.67506	-2.78621	0.407028	0.305403	0.505421	-0.129057	-0.189618	0.216961	-1.33801	-1.11413	-1.23196
Bpnt1	+	-0.582848	-0.628463	-0.937108	-0.759436	-0.529262	-0.641742	-0.457871	-0.44397	-0.445537	-0.393847	-0.347649	-0.481262	-1.28977	-1.36715	-1.67665	-1.45206	-1.47847	-1.57432	1.33304	1.26666	1.20014	1.23877	1.21022	1.16685	1.18139	1.1906	1.27223	1.15426	1.2016	1.01121	1.15247	0.686822	0.610937	-0.480796	-0.356996	-0.857433	-0.853671	0.394268	0.509619	0.255237
Bpnt2	+	1.04208	1.28385	1.9754	1.83701	1.04455	0.819197	1.03401	1.27257	1.35737	0.856787	0.329838	0.765886	0.070695	-0.159011	0.745181	0.99068	0.538959	0.565289	-0.373721	-0.627035	-0.641559	-0.821222	-0.987008	-0.490921	-0.522538	-0.821493	-0.572731	-0.844706	-1.01321	-0.343436	-0.530905	0.227635	0.0575092	-0.96279	-1.06959	-0.219253	-0.168024	-1.96382	-1.79855	-1.88298
Bptf	+	1.53247	1.74524	1.67548	1.86762	1.39971	1.69816	0.916442	0.896662	0.389639	1.00484	0.73292	0.853046	0.290987	0.730131	-0.654553	-0.360034	0.465624	-0.0366979	-0.547923	-0.916259	-0.811225	-0.9775	-0.475519	-0.503034	-0.374139	-0.621369	-0.538764	-0.555566	-0.477535	-0.1922	-0.187712	0.352965	0.621163	-1.49441	-1.35154	-1.28299	-0.729436	-1.33798	-1.50486	-1.24186
Brap	+	-0.170737	-0.446918	-0.16204	-0.0705469	-0.129763	0.0381563	0.0730216	-0.0243325	-0.135517	-0.221431	-0.329444	-0.0962995	-1.5233	-0.970951	-1.90414	-3.98013	-0.576515	-1.2469	1.16433	0.957644	0.957352	0.813418	0.828871	1.23097	0.980788	1.17224	0.381147	0.00568477	0.266003	0.627444	0.471239	1.18822	1.58445	-0.10734	-0.769339	-0.0430476	-0.126149	-0.0166681	-0.0681497	0.378669
Brca1	+	0.905989	1.15583	0.642977	1.15602	0.880044	1.04732	0.2606	0.503149	0.14744	0.597254	0.0106521	0.550491	0.919687	-1.16121	-1.31083	-0.622988	-0.749045	-2.75538	0.091164	0.333992	0.243551	-0.157478	0.291985	0.30165	0.0869535	0.661268	0.273846	0.698045	0.592191	0.84641	0.917909	0.1693	0.393708	-1.82443	-1.72787	0.353904	-0.0720659	-2.60299	-0.329691	-1.71935
Brcc3	+	-0.0342473	0.149288	0.508454	0.414654	-0.608355	-0.361752	-0.000807914	0.0781571	-0.322195	-0.00368343	-0.289483	-0.429514	-1.7474	-2.34161	-1.54139	-1.94373	-1.56893	-1.27454	0.705538	1.05068	1.05649	0.915731	1.02438	0.7107	0.607105	0.499192	0.727461	0.521988	0.708607	0.570313	1.00505	1.71251	1.74256	-1.95191	0.178699	-0.708917	0.379518	-0.00847427	-0.232932	0.102792
Brd1	+	0.340767	1.06559	0.35018	0.903958	0.316324	0.487244	-0.120802	0.186419	-0.219709	0.356728	0.15032	-0.299787	-0.176047	-0.137241	-0.10793	0.63828	0.479197	0.774751	-0.55025	-0.375694	-2.67655	-0.83244	0.000953032	0.0642221	-0.275186	-0.772154	-2.04397	-0.47601	-3.88977	1.54928	-0.300203	0.442548	0.229457	0.505105	0.936045	0.636731	0.853922	0.709071	0.615776	0.660867
Brd2	+	0.85826	1.15036	1.16427	0.953069	0.947714	1.37367	0.0234291	0.476241	0.48573	0.525418	0.17105	0.678038	-0.445536	0.497283	-0.892449	-0.495573	-1.14462	-0.15484	-0.406913	-0.461246	-0.0147773	-0.315906	0.0888878	-0.365267	-0.588062	-0.0548705	0.455503	0.057346	0.661185	0.84815	0.657928	-0.133331	-0.16227	-1.38958	-1.45516	-2.36475	-3.64556	0.517627	1.06231	0.83724
Brd3	+	0.763074	0.699803	1.29288	1.36359	0.89787	0.838534	0.287866	0.628385	0.427869	0.668452	0.250727	0.309409	0.248853	0.460215	0.290017	0.22354	0.828332	1.02029	-0.35801	-0.598993	-0.140945	-0.221814	0.0703962	0.527571	0.487248	0.622789	-0.513166	-0.831328	-0.482103	-0.0561411	0.0718605	0.287046	0.31796	-1.62985	-1.74683	-2.54653	-3.74466	-0.518784	-0.112831	-0.382598
Brd4	+	0.58665	1.01721	1.52125	1.56139	0.401087	0.716413	0.226067	0.637215	-0.377344	0.210346	0.229403	0.311411	0.955314	1.05965	1.34163	1.27301	1.92602	2.02298	-1.19032	-1.81413	-1.18036	-1.04272	-1.64368	0.300642	0.280316	-0.215358	-0.543925	-0.936307	-1.31384	-0.305212	-0.343618	-0.83324	-0.527602	-1.0673	0.077801	-0.335029	-0.167198	-0.88046	-1.06008	-0.878102
Brd7	+	1.11471	1.09096	1.31129	1.64378	1.48592	1.4456	0.794408	0.558782	-0.685938	-0.167659	0.0086986	0.292633	-0.0639135	0.868287	0.180821	0.0846203	0.170306	0.642209	0.149126	-0.414051	0.0824823	-0.160594	-0.518107	-0.561598	0.0791426	-0.53058	-0.406445	0.0841096	-0.0710786	0.773639	0.0457106	0.656074	0.748974	-1.06425	-3.06189	-0.898377	-2.75152	-1.44875	-0.969231	-0.5383
Brd8	+	1.26386	1.44504	1.2225	1.63118	1.5178	1.51102	0.571673	0.325988	0.994006	0.752946	0.268921	0.824185	0.751201	-0.266186	-0.0467828	-0.677603	0.184641	-0.236953	0.782244	0.00722568	-1.21308	-1.48259	0.974895	-0.717374	-1.96229	0.6828	0.138575	0.343387	-0.0760478	-0.00572243	-0.00745857	-0.185702	-0.667031	-1.32919	-1.34671	-0.383532	-1.22536	-1.40258	-1.04649	-1.91539
Brd9	+	-0.671941	0.99401	0.379451	0.846268	1.01531	1.05942	0.891763	-0.00381805	-0.179682	-0.219668	0.0617504	-0.0269186	-1.03192	-0.195865	-0.210133	-0.382082	-0.944857	0.264093	-0.874494	-0.60152	-2.56775	-0.160029	1.29605	-0.837952	0.660419	-1.5575	1.00224	1.90616	1.4435	0.448595	0.755865	1.1911	0.413689	-0.907679	-1.42166	-0.518798	0.455025	-2.11754	1.03146	-0.684363
Bri3	+	1.4491	1.72852	1.05447	1.51258	0.74446	1.1634	1.06976	1.35372	0.764927	0.274392	0.160968	0.469481	0.291549	-0.826692	-0.691652	-0.845111	-2.21366	-1.95477	-0.363065	-0.574561	-0.518726	-0.393634	0.09724	-0.350825	0.340757	-1.04822	-0.0791263	0.511421	-0.70304	1.13723	-0.425465	-1.05857	-0.219024	0.579697	0.508557	-1.839	-1.99768	0.575881	-0.00367083	0.318392
Bri3bp	+	0.597447	0.904886	2.16653	2.57734	0.943962	1.19951	0.885028	0.668399	-0.201579	-0.16307	-0.0902025	-0.0941524	-1.16086	-0.477128	0.778441	1.43786	0.831337	0.865792	-1.00841	-1.089	-0.934698	-0.394359	-0.509803	-1.72668	-1.29427	-1.90278	0.197555	-0.232111	0.612157	0.468859	0.818048	-0.367259	-0.582217	-0.0926496	0.193128	-1.42909	-0.67779	-0.579507	-0.462178	-0.676482
Brip1	+	-0.106523	-0.417427	1.33223	1.47888	0.371238	0.303746	0.779047	1.61224	-0.548773	-1.10374	-0.0366123	-2.71122	0.197892	-1.54114	-0.547171	0.339334	-0.650908	-1.49421	-0.48746	-0.563269	-1.9581	0.608829	0.99351	-1.23219	0.363449	0.256376	0.28092	0.19597	0.809408	0.703737	-0.317777	1.61069	1.92426	-0.0574906	0.372022	-0.0536418	-0.675808	-0.882661	0.732225	0.120108
Brix1	+	1.63924	1.56373	1.02097	0.974823	1.60156	1.47461	1.23581	1.08075	1.26301	1.20827	1.3082	1.42126	-0.829877	-0.997798	-1.29969	-0.92575	-0.988576	-1.29158	0.135822	0.190356	-0.15553	-0.0931265	-0.141146	-0.294513	-0.352611	-0.503395	-0.176661	-0.413029	-0.542028	0.271396	0.0632632	0.309463	0.15162	-1.02358	-0.931226	-0.80087	-0.799866	-1.43166	-1.46959	-1.45206
Brk1	+	0.660502	0.57271	0.296997	0.754716	0.568154	0.611564	0.767293	0.507295	0.741682	0.602687	-0.0287093	-2.11181	-1.01223	-0.419104	-1.42378	-0.133518	-2.06709	-1.79641	1.08047	0.724183	0.656352	0.669524	0.582544	-0.465683	-0.392916	-0.741511	0.341254	0.236188	0.0660401	0.991661	0.726923	-1.2462	-1.56805	-0.193937	-1.14502	-0.606626	-1.34326	1.49006	1.54454	1.5025
Brox	+	0.0155859	0.350049	-0.273359	0.12869	-0.464461	-0.384547	0.286867	-0.102143	0.256788	-0.278049	0.1567	0.244924	-0.019486	0.00976391	-0.865516	-0.643704	-2.49061	-1.26437	1.25934	1.04628	1.02432	0.828997	0.952193	0.512635	0.648107	0.587233	0.64702	0.485519	0.53119	1.01673	0.720084	0.691563	0.735417	-2.54272	-1.8387	-2.63128	-1.17171	0.688506	0.533513	0.612637
Brpf1	+	0.60155	0.560891	0.233064	0.401747	0.835818	0.969343	0.638341	0.885654	0.501291	0.531701	0.433028	0.486497	1.01248	0.655625	0.583679	0.182673	0.293086	-1.23925	-2.29572	0.605485	-0.0879972	1.62279	0.763345	0.0194373	0.149841	-1.44264	0.478641	-0.742889	1.21404	0.337902	-1.47285	-1.13172	0.324365	1.12322	-1.13711	-1.66627	-0.301044	-1.48107	-1.26325	-2.18371
Brwd1	+	-0.941208	0.110545	0.158473	-0.469106	-0.787857	-0.576152	0.722304	-0.888454	-0.699331	-1.14409	-0.460131	-0.883999	-3.85619	-1.12493	-0.130103	-0.113592	1.59832	1.71049	0.409799	-0.163045	-0.235952	0.568117	-0.19517	1.35054	1.15739	-0.550073	-0.0962514	0.747364	0.392916	-0.548248	-0.0546246	0.143634	0.605033	-0.187142	0.125623	-0.191128	1.29022	0.509781	1.24909	1.44715
Bsg	+	1.2969	1.19893	1.22413	1.02634	1.3634	1.43285	1.0775	1.09096	1.06137	1.17752	1.14403	1.10137	-0.543952	-0.504537	-0.764649	-0.726707	-0.603751	-0.591556	0.392204	0.455511	0.0648153	0.109664	0.104995	-0.3364	-0.247267	-0.195341	-0.0580311	0.0400172	0.0377336	-0.152812	0.00461423	0.23739	0.0892678	-1.26568	-1.54645	-0.895941	-1.02856	-2.08878	-2.09415	-2.08694
Bspry	+	0.616345	0.796047	0.569008	0.447915	0.720379	0.776717	-0.577383	0.734421	-1.1274	-1.46832	-1.72841	-1.02643	-1.0229	-0.736448	-1.20051	-0.828564	-0.715424	-1.12121	1.02213	0.916133	1.01716	1.07184	0.995198	1.04399	1.09769	1.19371	0.878128	0.998523	1.01281	0.90647	0.845143	0.640151	0.822563	-0.937292	-0.87538	-1.06668	-1.23366	-1.00436	-1.22274	-1.2294
Bst2	+	0.584173	0.650594	0.488632	0.436433	0.659821	0.551138	1.5666	1.51452	1.37613	1.25473	1.62198	1.7033	0.597627	0.762963	1.19716	1.2504	-0.371105	-0.645723	-0.0621145	-0.210928	-0.162692	-0.451704	-0.549553	-0.525715	-0.266039	-1.15586	-0.166898	-0.0900621	-0.186654	-1.85904	-0.498748	-0.764818	-0.488936	-0.0866136	-0.0141766	-1.50281	-1.77591	-1.28674	-1.77532	-1.31805
Btaf1	+	0.348712	0.434277	0.365794	0.540773	0.35108	0.638511	0.365585	0.278673	0.237195	0.402995	-0.00509035	0.0576906	-1.88171	-1.54904	-2.15247	-2.47487	-1.86943	-1.91607	0.836271	0.917335	0.891769	0.816821	0.795735	0.399628	0.485314	0.46826	0.91007	0.901897	0.863056	1.048	0.941827	0.803666	0.705184	-1.03187	-1.46941	-0.214598	-0.231545	-0.278453	-0.36293	-0.368632
Btbd1	+	0.240203	0.387978	0.350389	1.12109	0.817243	-0.207775	0.645101	0.973945	0.149493	1.1886	0.471097	-0.890868	-0.180547	-0.267234	-1.84835	-0.649323	-0.407546	-1.7472	0.980614	0.221383	0.441862	-1.15098	0.0502771	1.01603	1.28376	1.18626	1.14425	-2.25235	-2.14023	1.23213	1.31252	0.338971	0.37213	-0.763215	-1.17525	-0.439996	-1.41789	-0.660172	0.191488	0.0821171
Btf3	+	-1.1639	-0.974915	-0.544628	-0.718346	-0.843585	-0.789604	-0.523656	-0.601002	-0.770319	-0.61382	-0.893031	-1.07536	-1.83113	-1.80181	-2.26067	-1.75921	-0.518579	-0.532565	0.612451	0.638778	0.767106	0.797613	0.739609	0.622881	0.66365	0.735488	0.848453	0.816161	0.774919	0.825721	0.916747	0.730413	0.741702	0.727929	0.843772	1.05582	1.0556	1.02172	1.1564	1.1232
Btf3l4	+	-1.28512	-1.17875	-2.44638	-0.532282	-0.794691	-0.655618	-0.597885	-0.101718	-1.0182	-0.49525	-0.287598	-0.815424	-1.00496	-1.35997	-1.71736	-1.11048	-1.23253	-1.00575	0.646685	0.386278	0.939362	0.914944	0.806695	1.15077	1.12748	0.821453	1.19955	0.310505	0.00214682	1.09678	0.82222	1.20764	1.02817	0.509422	0.454633	0.230386	0.93855	0.890504	1.02904	1.12676
Bub1	+	0.381139	0.904977	0.410615	1.64737	-0.554252	-1.37	0.74379	0.378195	-0.36212	-0.260242	-0.149223	-1.55107	0.839103	-1.18703	-1.9019	-1.65833	-1.78141	-1.39169	0.185562	0.0665604	0.372459	0.512456	0.301032	0.0487389	-0.319994	0.208733	0.522479	0.516166	0.543578	1.01442	0.96238	1.32438	1.11304	-0.17968	-2.67391	-0.0309582	-0.218726	0.694582	0.752978	1.14582
Bub1b	+	-0.00333865	-0.209186	-0.325365	0.803402	-0.94112	-0.49027	-0.946186	-0.524403	-0.326959	-0.831336	-0.885298	-1.34263	-1.1262	-1.69286	-1.84979	-2.64318	0.130762	-2.14756	0.394542	0.631347	0.221683	0.724336	0.183323	0.632373	-0.195148	0.930719	0.923506	0.783565	0.915747	1.11582	1.42003	0.520673	1.06792	1.08504	0.577566	0.655209	0.625929	0.818304	0.523685	0.795348
Bub3	+	-0.1137	-0.297187	-0.94232	-1.18285	-0.505254	-0.704407	0.142279	0.594607	0.147952	0.703668	0.363893	0.414154	-1.02114	-0.457465	-2.05295	-1.54684	-0.981351	0.096309	1.45918	1.86042	1.2278	0.962578	0.799578	0.253668	0.417291	0.446806	1.2163	1.16809	1.43071	1.08561	1.34375	0.357161	0.76036	-1.37304	-1.03149	-0.973684	-1.17928	-1.17792	-0.931381	-0.779912
Bud13	+	0.632807	0.749988	0.123339	0.0754187	0.545282	1.60535	-0.399683	0.224371	-0.0458384	-0.875726	-0.203735	0.170513	1.34488	1.8251	1.04704	0.989537	1.24921	0.545785	-0.864908	-2.69698	-0.364043	-0.941264	-1.0421	-0.672401	-0.610651	-0.757638	-1.35083	-0.789866	-1.21885	-0.290197	-1.54343	0.120743	-0.424244	0.536187	2.28219	-0.0896534	1.11866	0.255529	-0.277622	0.0177331
Bud23	+	-0.116742	0.135836	-0.263253	-0.0582367	-0.339281	-0.446216	-0.189259	-0.108162	-0.700599	-0.0618439	-0.485319	0.18812	-1.78314	-1.42959	-2.36014	-2.84122	-0.7205	-1.21898	0.932824	0.939861	1.12569	1.15861	1.25099	0.988907	1.23593	1.27612	0.259415	0.31819	0.23155	1.08826	1.24303	1.31319	1.24422	-0.123296	-0.5492	-0.111148	-0.258678	-0.262592	-0.154391	-0.348954
Bud31	+	1.02632	0.794303	0.425838	0.17784	0.950744	0.776285	0.337124	0.794004	0.476549	0.601883	0.712277	1.05447	-1.0649	-0.691107	-1.45544	-1.05009	-1.14191	-1.22154	1.00426	0.895155	0.286522	0.570551	0.24149	-0.344794	-0.445946	-0.357128	1.29576	1.32439	1.2598	1.06914	0.819033	0.585537	0.406713	-1.06567	-1.58678	-1.69112	-1.61496	-1.17293	-1.42371	-1.55797
Bysl	+	0.909824	0.776361	0.633496	0.647285	0.896867	1.00017	0.471635	0.521938	0.748253	0.693978	0.48018	0.585242	-1.3365	-1.02626	-1.40319	-1.36624	-0.957721	-1.06841	0.942146	0.994615	0.548896	0.703421	0.67514	0.504262	0.550926	0.440804	0.641019	0.765189	0.555792	0.694869	0.655108	0.542685	0.489275	-1.57709	-2.09123	-1.60575	-1.65334	-1.39246	-1.27665	-1.31453
Bzw1	+	-0.311101	-0.00566769	-0.142656	-0.426742	-0.395056	-0.281118	-0.415645	-0.405755	-0.276331	-0.342448	-0.252238	-0.0656223	-1.86325	-2.09536	-2.7236	-2.57081	-1.05457	-1.21136	1.52345	1.3476	0.943039	1.09256	0.954048	0.754977	0.716484	0.524508	0.669919	0.825848	0.476464	0.96193	1.09634	0.427115	0.540398	0.771303	0.123368	0.0654438	0.0325463	0.35799	0.367477	0.266524
Bzw2	+	0.284039	0.0631421	-0.241757	-0.189142	0.155102	0.176207	0.0663941	0.0304311	0.245865	0.156748	0.182144	0.240703	-1.75909	-1.59492	-2.2427	-2.41033	-1.835	-1.53945	1.2023	1.24017	0.984566	1.01028	0.952933	0.761678	0.833678	0.769007	0.800142	0.864359	0.760042	1.00445	1.09867	0.971344	0.861551	-0.283649	-0.693803	-0.860422	-1.05325	-0.320953	-0.371101	-0.32039
C1d	+	0.73556	0.799073	1.12346	1.24061	1.05754	1.07162	0.918055	0.943254	0.401959	0.527363	0.478006	0.809604	-0.916113	-0.637819	0.18655	0.441031	0.323399	0.624061	0.0299701	0.0576216	-0.176272	-0.0256955	0.376924	-0.843199	-0.767924	-1.04434	0.855153	0.786399	0.696484	0.287171	0.502962	-0.344556	-0.131776	-2.8424	-1.69983	-2.70143	-2.03286	-0.252637	-0.531418	-0.325568
C1galt1	+	-0.0919965	-0.0201384	0.086453	0.170234	-0.0602285	0.267776	-0.138485	-0.276858	-0.126798	0.111878	-0.876296	-0.191173	1.01577	0.289725	0.17716	0.118047	0.370884	0.110315	-0.0761354	0.147201	0.237653	0.281271	0.366864	0.108058	0.228918	0.344945	-1.19663	-1.0473	-1.09592	-1.00799	-0.903943	-0.0339844	-0.278414	1.46229	1.08013	1.31424	1.54336	1.06586	-4.56001	1.08326
C1galt1c1	+	0.825446	0.891277	0.590333	0.920059	0.460222	0.509238	0.553845	0.453211	0.291894	0.595033	0.74928	0.6141	0.928604	1.08666	0.992973	0.658359	-1.38614	0.272387	-0.274968	-0.0854713	0.111282	0.138138	-0.141358	0.336688	0.347901	0.396076	-1.87514	-2.99155	-0.265809	-2.41556	-2.42918	0.225929	0.152911	0.137866	0.470509	0.453966	0.352203	-0.669002	-1.56352	-0.418709
C1qbp	+	1.16677	1.39398	1.13589	1.15529	1.08907	1.27335	0.983388	1.00377	0.867687	1.00899	0.805666	1.00994	-0.210975	0.341552	-0.208581	-0.0521455	0.274005	0.145865	0.238668	0.157739	0.402503	0.0822048	0.380079	0.27899	0.202581	0.211473	-1.29605	-1.33635	-1.35439	-0.479946	-0.588711	0.264525	0.672118	-1.82024	-1.87966	-1.50182	-1.52495	-1.43011	-1.52815	-1.33403
C1qtnf1	+	1.04842	0.668924	1.2255	1.5193	0.739799	0.497384	1.37499	1.54455	1.40942	1.34747	1.12065	1.31123	-0.812654	-1.23131	-1.22851	-0.271413	-0.672749	0.227265	-0.270676	-0.933105	-1.2085	-0.636747	-1.1386	-1.13226	-0.523324	-0.558218	-0.280422	-0.706717	-1.73125	-0.0616838	-0.713774	1.35912	1.14307	0.158177	0.219867	-0.302239	-1.78719	-0.411864	-0.759739	0.457797
C2cd2	+	-0.241913	-0.106908	0.427456	0.823236	0.138836	0.240977	0.273576	0.515091	0.0874424	0.307511	-0.0172702	-0.427668	0.731155	0.436538	1.36526	1.24365	1.14339	1.43768	-4.12647	-0.708355	-1.22997	-1.38761	-0.63467	-0.671317	-0.118618	-0.204556	-0.969055	-0.470847	-0.414922	-0.933018	-1.17394	-0.445259	0.0350399	0.681738	1.19771	0.736729	1.03746	0.531454	0.4695	0.420948
C2cd2l	+	-0.86618	-0.436	-0.640887	0.0234972	-0.706775	-0.558486	-0.64949	-0.310148	-0.954507	-0.399706	-0.111636	-0.412769	-0.223062	-0.396323	0.23276	0.105584	-1.35427	-0.593542	0.445159	1.08972	0.0578319	0.915156	0.529034	0.921403	1.09421	1.17927	-0.114669	0.418878	1.2097	0.864635	0.0514536	1.7834	0.345145	0.770792	-3.66262	-0.242528	0.302383	-0.249477	-1.54405	2.08712
C3	+	-2.81719	-0.433102	-0.848173	-2.28094	-0.828213	-0.153581	-1.93866	-0.990183	-0.210491	-0.203148	0.152882	-0.0905325	-0.0326725	0.0196423	-2.13798	0.17847	-0.279321	-0.326098	0.973243	0.863425	0.509292	0.130821	0.515726	0.328406	0.353366	1.03951	0.0980956	0.334807	0.454437	0.769597	0.173912	1.09708	0.765959	1.76731	1.58717	1.14316	0.850928	0.408164	-0.581002	-0.364109
C4b	+	0.186612	0.0398802	-0.131965	-0.0553807	0.00992752	-0.123526	0.0366525	-0.106724	0.0637076	-0.130809	-0.00282029	-0.0515199	0.951034	1.0778	0.735197	0.585104	0.939535	0.928498	-0.892695	-0.981114	-0.712359	-1.05706	-0.707875	-0.504131	-0.647832	-0.800798	-0.88205	-1.19292	-1.09077	-0.567851	-0.402372	-2.34608	-2.20514	1.60436	1.53814	1.15066	1.02326	1.55977	1.63982	1.52384
Ca12	+	1.35358	1.53668	1.43303	1.41581	1.04746	0.904359	1.27708	1.16734	1.42734	1.44122	1.00086	0.970348	-0.895568	-1.81585	-0.960511	-0.855614	-1.80821	-0.507904	-0.0921954	0.423675	-0.271827	-0.228356	-0.357014	-0.54912	-0.0251664	-0.117828	-0.406717	-0.460502	-0.446061	0.0188359	0.164566	0.510231	0.113435	0.348051	-0.514946	-1.87656	-1.41014	-0.930027	-0.843649	-1.18014
Ca13	+	0.0543123	-0.576202	-0.715039	-0.846849	-0.39935	-0.201702	-0.159645	0.310265	-0.0552802	0.31712	0.0589428	-0.146035	-0.803878	-1.23663	-1.53694	-1.66837	-1.53827	-1.1006	1.19729	1.32065	0.932275	1.21284	0.833678	0.938438	1.14222	1.14983	1.47874	1.10567	1.22161	1.21811	1.1723	0.913422	0.954042	-1.23202	-1.17321	-1.2123	-1.24127	-0.524197	-0.525923	-0.638065
Caap1	+	1.03865	1.55443	2.2343	1.66813	1.18389	1.37885	0.79777	0.676803	0.412955	0.6468	0.73047	0.619403	0.33884	0.834985	0.578881	0.657116	-0.171947	0.191142	-1.59587	-1.04809	-1.05966	-1.9751	-0.643554	-0.67583	-1.06572	-0.956321	-0.792623	-1.36432	-1.1892	-1.25048	-0.676259	-0.103503	0.176746	0.335581	0.525573	0.00784355	0.261819	-0.304419	-1.23199	-0.746078
Cab39	+	-0.53582	-0.497469	-0.62921	-0.662522	-0.790918	-0.59524	-0.776873	-0.55195	-0.612965	-0.565064	-0.869211	-0.742503	-2.17051	-1.18347	-1.48777	-1.61557	-1.26433	-1.44194	0.990572	1.12654	1.25898	1.44767	1.36365	1.45722	1.44886	1.66258	0.440844	0.386549	0.491924	0.902491	0.9155	0.721423	0.771811	0.15264	0.0675672	0.0108696	-0.261473	0.534912	0.60495	0.497257
Cabin1	+	0.48337	0.664445	0.375339	0.956483	0.466641	0.52294	0.52217	0.506063	0.589288	0.390488	0.161071	0.633913	-0.676346	0.83401	-2.2756	-0.0216748	-2.31797	-0.192533	0.190789	0.396932	0.223481	0.24265	0.203943	0.0220463	0.0359504	0.42985	0.341583	0.282981	0.236746	0.346376	0.612121	0.338032	0.957654	-3.69609	-2.61914	-0.763957	0.254245	-0.0716192	0.277861	0.135471
Cacna1c	+	0.156955	0.433985	-0.352026	0.63794	1.38912	0.782124	-0.605618	0.76489	-1.3438	1.76681	0.581959	0.718808	0.74456	1.07647	0.571872	0.609661	0.940935	-1.93811	0.687918	1.31012	0.26341	0.937146	0.341991	0.367243	-1.3036	-0.437976	0.891029	-0.984408	0.566337	-0.210288	-0.521891	0.448942	0.166935	-0.784892	-0.970175	-2.02843	-1.55647	-1.00671	-1.37746	-1.73531
Cacna2d1	+	0.852398	0.952571	0.796493	0.762907	0.820266	0.905812	1.01339	0.980579	1.05296	1.04952	1.0481	0.998887	-0.16947	0.134378	0.335141	0.568442	-0.523685	-0.308133	-0.0580948	0.138522	0.105592	-0.276423	-0.0289984	-0.211966	-0.011737	-0.479735	0.0903418	0.0520525	-0.129331	-0.302218	-0.257311	0.595616	0.306937	-0.687517	-1.3604	-1.72063	-0.400017	-0.346152	-3.90267	-2.38642
Cacul1	+	-0.0708586	-0.376612	-0.00869902	-0.115303	-0.505205	-0.389318	-0.504601	-0.369848	-0.812794	-1.27074	-0.169928	-0.795874	-3.21901	-0.677698	-0.504111	-1.41465	-0.542265	-0.237514	0.844771	0.421908	0.639579	0.740114	0.859064	0.984257	0.942515	0.527603	0.815341	0.489898	0.982445	0.935207	1.11744	1.0838	1.01203	-0.322035	-1.69699	-1.51449	-0.716319	1.40067	1.35715	1.08107
Cacybp	+	-0.506415	-0.408201	-0.2341	-0.258842	-0.340718	-0.302865	-0.374448	-0.390965	-0.552086	-0.449209	-0.641819	-0.476116	-1.63412	-1.54459	-1.88488	-2.0102	-1.35775	-1.39107	1.03341	1.06221	1.09717	1.13627	1.1693	1.0435	1.03654	1.07443	1.19114	1.14338	1.15839	1.15571	1.12578	0.971762	1.00015	-0.432689	-0.545779	-0.9563	-0.778356	0.365798	0.351751	0.354799
Cad	+	0.616207	0.637023	0.358569	0.383207	0.541059	0.490537	0.445103	0.440039	0.32801	0.399541	0.418187	0.440881	-1.87439	-1.77668	-2.14098	-2.08475	-1.6457	-1.63338	0.968767	1.00099	0.597581	0.600577	0.645741	0.283328	0.389802	0.341712	1.09838	1.129	1.18204	0.91564	0.964704	0.684503	0.736511	-1.07425	-0.99174	-1.01133	-1.07696	-0.530166	-0.57963	-0.617678
Cadm3	+	0.770869	0.632921	0.770578	0.748476	0.764048	0.736514	1.05495	1.03713	1.06097	1.08202	1.05349	0.964732	-1.7906	-1.58198	-1.58029	-1.59819	-1.01976	-1.40087	0.305756	0.507827	0.41973	0.493812	0.444461	0.568379	0.528829	0.468881	0.470224	0.524252	0.569841	0.436647	0.542553	0.450837	0.526019	-1.34165	-1.06813	-1.62029	-1.16411	-1.2279	-1.58832	-0.952654
Cadm4	+	-0.0604842	0.0646782	-0.271742	0.195003	-1.47176	-0.90084	-0.322275	-0.965876	-0.458166	-0.55313	-0.840346	-0.78364	-0.443115	-0.713402	-1.32912	-0.669968	-0.814746	-1.97349	0.974508	1.23159	1.20032	1.31967	1.34165	1.39523	1.37267	1.48597	1.13337	1.04676	1.22076	0.962328	1.16783	0.79797	-0.350243	-0.775404	-0.459056	-0.397547	0.603964	-1.71945	-0.417296	-0.82315
Cald1	+	-1.02444	-1.01983	-0.916392	-0.968287	-1.13802	-1.15178	-0.340951	-0.291089	-0.324684	-0.260001	-0.343931	-0.293167	1.39472	1.3667	1.63964	1.63263	1.10057	1.12424	-0.454433	-0.451552	-0.385856	-0.441862	-0.404667	-0.326957	-0.327861	-0.302717	-1.04963	-1.10673	-1.12993	-1.02537	-1.00985	-0.602783	-0.56562	1.22868	1.23047	1.28025	1.2531	1.47975	1.48186	1.44578
Calr	+	-0.265535	-0.0656603	-0.353317	-0.365039	-0.176408	-0.238746	0.177466	0.201184	0.106006	0.227777	0.222399	0.225583	1.57973	1.52808	1.62633	1.65059	1.54567	1.45907	-0.546587	-0.425662	-0.48583	-0.357203	-0.314721	-0.466905	-0.600666	-0.602478	-1.92216	-1.86728	-1.87851	-1.81583	-1.55623	-0.271858	-0.351399	0.893525	0.933252	1.34382	1.27687	-0.089681	0.0289578	-0.00858957
Calu	+	-0.118659	-0.19834	-0.0595968	0.0372223	0.370169	0.257669	0.649643	0.654557	0.404391	0.522562	0.952547	0.989105	0.634196	0.609956	1.80874	1.74632	1.60068	1.5386	-0.262745	-0.340508	-1.07824	-0.97545	-0.945074	-1.55655	-1.41803	-1.63968	-0.706092	-0.688194	-0.594893	-0.698177	-0.564773	-1.13939	-1.16368	-1.19355	-1.13576	-0.218827	-0.192836	1.41967	1.34483	1.3482
Camk1d	+	0.499977	0.581545	0.827045	0.836963	0.394311	0.461739	0.458775	0.431969	0.259318	0.273411	0.295669	0.293559	-2.25706	-1.24428	-2.35989	-1.99446	-1.69773	-1.2353	0.654903	0.719726	0.766869	0.706708	0.855709	1.02579	1.06541	1.10044	0.515414	0.452937	0.52889	0.799619	0.610522	0.576138	0.610172	-1.04278	-1.09602	-1.90035	-0.572012	-0.465044	-0.378017	-0.360598
Camk2d	+	-1.04458	-1.70387	-0.937158	-1.11669	-1.22027	-1.79641	0.192578	-0.0345908	-0.552666	-0.0684969	-0.111923	-0.0732602	-0.340576	-0.280862	-0.52745	-0.652394	0.304575	-0.197353	0.154084	0.0842739	0.758885	0.679949	0.14828	1.13464	0.929133	0.4223	-0.696495	-0.892318	-0.742334	-1.2679	-1.3049	-0.268528	-0.00951484	1.56256	1.16403	1.99555	1.99628	1.25794	1.77089	1.28457
Camk2g	+	0.558216	-0.069278	0.0829984	1.07836	0.755415	0.240319	0.500557	0.412641	-0.137526	-0.108054	-0.222728	0.343195	-0.822343	-1.29144	-0.716682	-0.603582	0.514019	0.769266	-0.340701	0.270281	-0.186655	-0.729041	-0.854004	-0.611139	-0.697338	-0.808798	-0.950025	-2.54302	-1.99979	-1.13789	-0.901233	-0.172986	0.485655	1.2783	0.809935	0.876166	1.35561	1.74116	1.61714	2.21501
Camkk1	+	-1.38747	0.821252	-0.676793	-0.896705	-1.16284	0.737073	0.907903	0.94343	1.02608	1.05557	1.10848	-0.469639	1.50038	1.64134	1.50293	1.42038	-0.814448	-1.07366	-1.7647	-1.13195	-0.318567	0.915573	0.247925	-0.993815	-0.634359	-1.39448	-1.1188	-0.718937	-0.724393	0.987113	-0.451617	-0.226408	-1.26505	0.690937	-0.400989	1.00769	-0.598155	0.720294	0.481626	0.507791
Camlg	+	0.422202	0.7664	0.98276	0.61136	0.683736	0.543264	0.502979	0.704067	0.371843	-0.175638	0.283014	0.525141	0.848809	1.04598	1.27982	1.42584	1.07032	1.21133	-0.598742	-0.126526	-1.54206	-0.68857	-0.765808	-2.11393	-3.59566	-1.78123	-0.350412	0.0826425	0.415283	-0.862208	-0.360046	0.327351	0.247613	-0.388332	-0.754301	-0.319218	-0.357899	0.0990233	0.262909	0.066899
Camsap1	+	-1.00853	-0.215252	-0.012988	-0.339654	-0.536704	-0.152361	-0.723395	-0.532756	-0.548153	-0.30198	-0.972894	-1.81312	-1.28209	-2.37999	-2.10135	-1.72809	-1.23532	-0.503991	0.734976	0.790252	0.865304	0.937048	0.85448	1.14875	1.6036	1.62514	0.683279	0.775101	0.586851	1.00322	0.83356	0.579492	0.702633	-0.167459	0.310033	0.214151	0.323452	0.664178	0.625296	0.695284
Camsap2	+	-0.352458	-2.11859	-1.9383	0.0548144	0.484886	-0.203423	-0.082275	-1.05511	-0.939559	0.475412	-0.91193	-0.609947	-1.79746	-1.61064	-0.446816	-1.27664	-1.03454	-1.5304	0.61232	0.542747	0.271922	0.671825	0.414038	1.60431	1.28002	0.917651	0.794633	0.451222	0.804858	0.980344	0.813339	-1.05574	0.971901	0.429265	0.263049	0.329529	0.92709	0.655802	1.39475	0.818122
Cand1	+	-0.939182	-1.0213	-1.02161	-1.05322	-0.928544	-1.07977	-0.558245	-0.73765	-0.622068	-0.543358	-0.58426	-0.619751	-1.3673	-1.20491	-1.57765	-1.55907	-0.862363	-1.06092	1.33762	1.37887	1.17024	1.15416	1.17819	0.861299	0.761795	0.872836	1.20923	1.16558	1.18137	1.05102	1.17158	0.90299	0.909982	-0.268121	-0.300386	-0.264057	-0.487357	0.750516	0.795787	0.808034
Cand2	+	0.247279	0.438124	-0.150429	0.0410885	0.422385	0.0957819	0.54926	0.408002	0.504848	0.716164	0.61316	0.502758	-1.54732	-0.855832	-2.37021	-2.23905	-2.13997	-1.57693	0.676125	0.697049	0.87526	0.493285	0.430708	0.507046	0.589509	0.785067	0.0859767	-0.125474	0.0662586	0.429675	-0.0810867	0.327218	0.406174	-1.29623	-1.17139	-0.644746	-1.26611	1.57557	1.48909	1.49191
Cant1	+	-1.36664	-0.929722	-0.281849	0.329011	-0.934497	0.307812	1.34254	0.519555	-0.19459	1.00966	1.32205	-1.46447	1.18121	1.86061	1.66142	1.84408	-0.490085	1.25254	-0.852228	-0.490861	-1.4526	0.585479	-0.50181	-0.811626	-0.464541	-1.95559	-0.158889	-0.758115	-0.0359985	0.0733246	-0.499525	1.14499	0.735626	0.788779	-0.236803	0.932844	-0.476042	-1.24217	-0.523953	-0.768933
Canx	+	1.0465	1.04268	0.947118	0.801906	1.11731	0.985268	0.979118	0.960569	1.21706	1.03547	1.09357	1.07437	1.01237	0.9184	1.06114	0.919254	0.775013	0.646817	-0.479019	-0.566257	-0.591879	-0.622276	-0.825502	-1.04758	-0.994131	-1.08654	-1.81925	-1.76339	-1.71471	-1.39749	-1.35569	-0.358142	-0.311705	-0.274611	-0.25734	0.270794	0.297424	-0.865579	-0.955771	-0.915282
Cap1	+	-1.60315	-1.5434	-1.57744	-1.64842	-1.55919	-1.60298	-0.95592	-0.91608	-0.860267	-0.748075	-0.825528	-0.913807	-0.251302	-0.361905	-0.344133	-0.425448	-0.27006	-0.393118	0.86311	0.88083	0.811037	0.910959	0.874848	0.638111	0.560132	0.599536	0.187356	0.204513	0.185421	0.198407	0.337814	0.448327	0.421113	0.887147	0.754393	0.787598	0.571663	1.90951	1.92972	1.83868
Cap2	+	0.233082	0.0663305	-2.02014	0.73461	-3.01294	-3.00952	0.598691	0.666311	0.0178786	0.218323	0.440422	0.20567	-0.635441	-0.700976	0.204703	0.261649	0.156191	0.0474814	0.447217	0.548461	0.344385	0.37187	0.512037	0.0134953	0.0656251	0.13844	0.89007	0.626502	0.705108	0.999202	0.821326	0.476354	0.485914	0.144352	-0.931112	-2.42402	-0.908676	0.71122	0.753572	0.736347
Capg	+	-1.36989	-1.21942	-2.08184	-1.83713	-1.36352	-1.48278	-0.940636	-1.00424	-0.893025	-1.03913	-0.862269	-0.499959	0.0898697	0.119311	-0.621227	-0.950217	-0.310688	-0.433595	1.30562	1.65609	0.96662	1.04059	1.04472	1.1668	0.671068	1.01261	0.51953	0.38036	0.648968	0.210534	0.436786	0.281163	0.579746	0.0920429	0.162429	0.0639018	0.436753	1.30597	1.38687	1.33121
Capn1	+	-0.305421	-0.319931	-0.454285	-0.396065	-0.53404	-0.541559	-0.381672	-0.385241	-0.33063	-0.382331	-0.377106	-0.320387	-1.44163	-1.45665	-1.31113	-1.43144	-1.11386	-1.30231	1.30179	1.30811	1.49433	1.46236	1.39393	1.73144	1.77981	1.69817	0.451747	0.319643	0.36455	0.641523	0.629048	1.29918	1.26253	-0.983672	-0.533426	-0.627667	-0.533394	-0.568781	-0.557359	-0.548186
Capn2	+	-1.38007	-1.24675	-1.53748	-1.32579	-1.32362	-1.44345	-0.698484	-0.764989	-0.749127	-0.769362	-0.721019	-0.675266	-0.508741	-0.401317	-0.899764	-0.863956	-0.374543	-0.452421	0.93158	1.00309	0.64615	0.727681	0.782899	0.37012	0.507331	0.56294	-0.138867	-0.0480057	-0.300896	-0.0687239	-0.14109	0.466989	0.32813	1.22613	1.22653	0.936017	0.960805	2.01184	2.12852	2.01697
Capn5	+	0.1184	0.138842	1.34604	0.821071	-0.0386532	-0.175314	0.325105	0.362913	0.357609	0.0252286	-0.238958	-0.133704	-1.85635	-1.03173	-0.360628	-0.37839	-0.56486	-0.736206	-0.619527	0.0414268	1.20976	1.07705	0.89265	1.60143	2.0398	1.54495	-1.24438	-0.0306423	-0.113647	-1.81515	0.621322	0.485073	0.849441	-0.55663	-0.514885	0.149318	0.235545	-1.16372	0.349601	-3.01919
Capn6	+	-0.211019	-0.121682	0.38597	0.011621	-0.107861	-0.116086	0.126832	0.107439	0.00286542	-0.216782	-0.395961	0.110754	0.295116	0.410693	0.106584	0.229767	-0.0631101	-0.291572	-3.30242	0.00681687	-0.612333	-0.239397	0.31547	0.206933	-2.42343	-0.328445	0.696053	-1.34623	-2.84293	0.14684	0.396308	1.27534	1.32148	1.58261	0.575244	0.633582	0.670344	0.889807	1.11901	0.995774
Capn7	+	-0.31698	-0.105786	1.34923	1.08492	-0.566606	0.127113	0.854787	0.401812	0.513469	0.279269	-0.0027067	-1.37214	-1.15705	-1.61093	-1.62422	-1.84796	-1.25395	-0.936197	0.521362	0.565366	0.743231	0.604805	0.529683	0.857292	0.611916	0.667229	0.888202	0.908707	0.562721	1.66696	1.53475	0.748077	0.523185	-1.05991	-0.890547	-1.20832	-1.83776	0.554615	-0.00525431	-1.30239
Capns1	+	-0.839392	-0.462964	-1.50479	-0.826108	-0.275709	-0.444069	-0.297311	-0.159638	0.287385	-0.17833	0.569181	0.69852	-2.40059	-1.84734	-1.16888	-0.995879	-0.635923	-0.799717	0.63036	1.01172	0.405541	0.292803	0.529289	0.244046	-0.105221	0.0579564	-0.137862	0.206659	0.104235	-0.171917	-0.135977	0.286606	0.236566	1.05119	0.980698	-0.70347	-0.467531	2.37755	2.30068	2.28764
Caprin1	+	-1.06251	-1.04007	-0.21014	-0.636096	-1.15536	-0.625885	-0.790191	-1.11737	-0.576679	-1.331	-0.849166	-1.34595	0.291211	0.0198544	-0.581401	-0.929822	0.917979	0.884538	0.705299	0.652567	-0.189995	-0.394853	-0.689269	-0.668556	-0.559671	-0.423879	2.25886	1.76918	1.87319	1.45921	1.84575	-0.969514	-0.663138	-0.407887	0.943492	1.00306	0.945248	0.395282	0.856778	0.396882
Capza1	+	-1.9399	-1.96421	-0.909977	-1.19685	-0.692708	-0.954877	-0.58435	-0.506992	-1.66452	-0.692245	-0.697096	-0.619963	0.427676	0.797931	1.06682	0.700998	0.301548	0.624826	1.84614	1.86788	0.9455	1.20837	1.12513	-0.69478	-1.12811	-0.817671	1.25482	1.01955	1.33656	-0.220615	0.069808	0.831309	0.851013	-0.787434	-0.332558	0.519669	-0.42453	0.117501	-0.227204	0.143541
Capza2	+	-0.832259	-1.17711	-1.57784	-1.32283	-1.4541	-0.955916	-0.602288	-0.878211	-0.0948091	-0.489038	-0.186751	-0.000785274	-0.208041	-0.159931	-0.429581	-0.41521	-0.523006	-0.200181	2.00992	1.89015	1.64158	1.32956	1.42672	1.11543	1.09009	0.760786	-0.814961	-1.71347	-1.00882	-0.257053	0.132928	1.49832	1.34656	0.562293	0.863943	-0.30541	0.258438	0.0528082	-0.58692	0.214995
Capzb	+	-1.34778	-1.59877	-1.24599	-1.1431	-1.95735	-2.09249	-0.741853	-0.720751	-1.41811	-1.13298	-1.66995	-1.44216	-0.170967	-0.392234	0.294731	0.120228	0.453765	0.511534	0.67164	0.845439	1.03566	1.08185	1.1952	0.523528	0.967241	1.48704	0.347366	0.761973	0.73622	0.618546	0.75446	0.903102	0.630916	0.0433191	0.0922834	0.454525	0.434805	0.664674	0.810144	0.634285
Card14	+	0.266823	-0.616431	-2.24941	1.39552	0.440377	0.467599	1.29114	-0.0346646	0.601495	0.2385	0.46609	0.76316	0.539577	0.770667	-0.330553	-0.191335	0.60082	0.592258	0.93553	0.765992	-2.35028	1.21018	1.06254	-0.293673	0.821537	0.533167	-2.26809	0.313183	-0.707153	-2.01255	-1.5586	0.266386	0.91159	-0.880733	-0.957043	-0.633862	-0.738153	0.245992	0.151672	0.170734
Card19	+	-0.689469	-0.388942	-0.214058	-0.248965	0.213515	0.0558704	0.895086	1.19404	0.56608	0.179916	0.863089	1.26733	0.945498	1.02294	1.66566	0.927554	1.14592	1.17446	1.24336	-0.687214	-1.39709	-0.627738	-0.574248	0.034795	-1.21394	-1.91634	-1.79094	0.608174	-1.99972	-0.984894	-1.38594	0.985682	-0.0636173	1.16538	-0.308965	-1.1989	0.618117	-0.561626	-0.334417	-0.185437
Carhsp1	+	0.410056	0.356268	0.628169	0.634465	0.384682	0.311416	0.559929	0.531054	0.140457	0.270342	0.498056	0.446057	-1.89531	-1.83212	-2.53689	-2.20024	-1.84793	-2.48743	1.08342	0.908036	0.633773	0.745118	0.661831	0.404114	0.226877	0.582758	0.435089	0.286906	0.284422	0.221095	0.312578	0.470619	0.318671	-0.628898	-0.806765	-0.27975	-0.788369	0.817828	0.89885	0.840764
Carm1	+	-0.832897	-0.323398	-0.486624	-0.391914	-0.334558	-0.216782	-0.529246	-0.301344	-0.459656	-0.54949	-0.797987	-0.773735	-1.68116	-1.17063	-1.9789	-1.73123	-1.48169	-1.67847	0.797548	1.08254	0.74946	0.684366	0.827845	0.672906	0.931295	0.669935	1.51243	1.3549	1.24395	1.19929	1.1691	1.0839	1.11546	-0.698551	-0.568603	-0.613665	0.0454267	0.865178	0.877261	0.717743
Carmil1	+	-1.84024	-1.09553	0.288216	-0.542071	-0.471066	-1.07646	-0.346628	-0.30175	-0.995919	-1.51064	-0.696342	-0.56495	-0.0155419	0.247161	-1.42849	-0.173757	-1.84391	-0.566012	-0.334399	0.512438	0.726466	0.659708	0.770964	0.243186	-0.121768	0.233306	0.869453	0.815839	0.904814	0.0182903	0.84237	-0.0342938	0.416143	0.700981	0.0395705	0.00956969	-1.15465	2.1782	2.27247	2.36527
Carnmt1	+	-0.0657397	-0.316197	-0.00794661	0.0864909	-0.119911	-0.243671	-0.109873	-0.0803718	-0.294104	-0.313817	-0.284358	-0.274955	-1.59898	-1.90646	-2.54707	-1.89041	-1.16034	-1.07605	0.869767	0.950889	1.10653	1.05482	1.08841	1.2568	1.10459	1.19052	1.07185	1.07024	0.947486	0.985794	1.04823	0.853091	0.869981	-0.845895	-1.02595	-0.840072	-0.996308	0.0410214	0.233598	0.168363
Cars1	+	-1.10627	-0.864659	-1.08218	-1.06251	-1.30394	-1.08825	-0.650177	-0.629131	-0.864021	-0.861076	-0.611054	-0.692336	-1.37474	-1.36871	-1.15741	-1.33868	-0.995352	-1.03409	1.19905	1.17487	1.03846	1.01278	0.920387	0.822812	0.805019	0.679899	1.09054	0.992249	1.02829	0.975371	0.96605	1.15523	1.17886	0.349045	0.262908	-0.52852	-0.3781	1.09799	1.1542	1.0872
Cars2	+	1.42661	1.61832	1.31567	1.27288	1.20123	1.00561	1.20273	1.02556	1.52281	1.19028	0.945488	0.815771	-1.26822	-0.186386	-0.879737	-0.690392	-1.33256	-0.563425	0.123696	-0.505894	-0.163286	-0.264661	0.278982	-0.278678	-0.107484	0.120382	-0.616232	-0.50048	-0.54508	-0.6417	-0.401586	0.535109	0.484871	0.015303	0.0312953	-0.197525	-0.986575	-1.89415	-2.32571	-1.78284
Casc3	+	-0.885859	-0.796456	-0.789869	-0.450911	-0.562375	-1.43942	-0.581729	-1.12301	-1.50547	-1.44285	-1.46078	-1.58275	-0.521833	-0.943946	-1.18947	-1.41387	-0.48081	-0.463661	0.651822	0.690791	1.0827	1.05123	0.875093	1.36122	1.52383	1.52526	0.777666	0.566283	0.235352	1.01171	0.930113	1.12561	1.10186	0.414844	0.284772	-0.227225	-0.140947	1.07849	0.842079	0.872517
Cask	+	-1.57529	-1.39288	-1.82221	-0.539473	-1.35217	-1.2699	0.278762	0.175919	-0.300559	0.147937	-0.782558	-0.737272	-0.772035	1.20252	2.0578	1.33736	0.23373	1.11712	0.224106	-0.584729	0.506527	0.448267	-0.586497	1.24517	1.14113	1.17639	-1.39062	-1.11037	-1.29784	-0.74205	-0.469292	-0.261283	-0.29796	0.634059	1.3586	1.00382	0.827521	0.817526	0.51534	0.835396
Caskin2	+	0.284631	0.365014	0.311333	0.582961	0.110532	0.196587	0.356436	0.520982	0.258429	0.299323	0.281389	0.261861	-1.73444	-1.27045	-0.78033	-0.493597	-2.08593	-0.369722	0.771391	0.796969	0.668596	0.810607	0.805903	0.850445	0.973117	0.819368	0.688677	0.759912	0.799286	0.718023	0.757888	0.898528	0.821453	-2.27125	-2.75668	-1.73456	-1.42074	-0.20496	-0.388355	-0.258624
Casp3	+	-0.767214	-0.345982	-0.52659	-0.245498	-0.935764	-0.369764	-0.0806427	-0.251137	-0.807344	-0.534006	-0.229978	-0.459294	-0.799928	-1.73903	-1.79046	-0.938465	-1.37965	-2.80557	0.736386	0.701541	0.989394	0.946946	0.869744	0.517624	0.612884	0.426178	0.855399	0.479779	0.463857	1.02394	0.950649	0.93607	1.14242	0.602189	0.0238663	-1.24492	-0.371133	1.42731	1.50179	1.4144
Casp6	+	-0.717917	-0.490859	-1.47085	-1.83287	-0.401106	-0.864373	-0.408366	-0.578537	-0.583167	-0.398371	-0.0794092	-0.161939	-1.78799	-0.852989	-1.51816	-1.94041	-0.417225	-0.609359	0.430073	0.360513	0.584712	0.46048	0.735916	1.4159	1.61336	1.48386	-0.505493	-0.117192	-0.520454	-0.107888	-0.152128	0.841795	0.804053	0.502119	1.90852	0.991483	0.559904	1.14899	1.32964	1.34571
Casp8	+	-0.710126	-1.77932	-1.52867	-0.642812	-1.59753	-1.0907	-0.40976	-0.843267	-0.833391	-0.00443963	-0.127563	-0.462483	-1.10034	-0.992421	-1.43921	-0.306617	-0.43896	-0.692224	0.884122	0.74417	0.794754	0.665958	0.916714	0.830433	0.719741	0.710307	0.214802	0.280622	0.350855	0.438939	0.432387	1.46212	1.44594	-0.168314	0.260538	-1.22381	-0.356003	1.80625	1.79598	1.99334
Cast	+	-1.18314	-1.18462	-1.4012	-1.43457	-1.46213	-1.4723	-1.1203	-1.13421	-0.981818	-0.899336	-1.03329	-1.10222	-0.48268	-0.459603	-1.03344	-0.945747	-0.445326	-0.35103	0.858046	0.901102	0.852817	0.973643	0.9742	1.28296	1.31557	1.3406	0.18687	0.230566	0.250996	0.328608	0.385837	0.388488	0.43015	1.02353	0.928418	0.700861	0.67812	1.4038	1.36146	1.33032
Cat	+	0.906983	0.637824	1.21322	1.25845	0.779039	0.620285	0.71488	0.869014	0.552741	0.476546	0.482634	0.645898	1.36745	1.46056	1.47194	1.60364	1.42839	1.42081	-0.936848	-0.580667	-0.851744	-0.709674	-0.67445	-0.614696	-0.660851	-0.830849	-0.855823	-0.896996	-0.841877	-1.38017	-1.37001	0.379588	0.15919	-0.977561	-1.09261	-0.635057	-0.913041	-1.42078	-0.968027	-1.23737
Cav1	+	-0.284712	-0.347025	-0.508444	-0.421812	-0.349422	-0.42079	-0.0756987	-0.118808	0.0480126	-0.105858	-0.0858293	0.0852744	1.16844	1.09964	1.07056	1.0501	0.93213	1.02452	-0.635591	-0.489373	-0.859907	-0.896438	-0.972788	-0.95799	-1.0459	-1.10176	-1.1546	-1.17659	-1.05868	-1.29398	-1.65999	-0.470935	-0.475363	1.78559	1.9317	1.40314	1.59202	1.26101	1.15775	1.35836
Cav2	+	-0.31057	-0.0413677	-0.486728	-0.083448	-0.772277	-0.397333	0.192502	0.323094	-0.010398	0.308803	0.330389	0.243534	1.29057	1.63996	1.02968	1.24392	0.749012	0.797068	-0.824115	-0.589976	-0.14872	0.046397	-0.0362598	-0.512893	-0.655655	0.0338481	-2.81782	-1.75066	-2.1334	-1.50325	-1.29657	-0.428608	-0.413159	1.59578	1.30174	0.795407	0.958223	1.01528	0.816464	0.501514
Cavin1	+	-0.863685	-0.893882	-0.47562	-0.718185	-0.677295	-0.673619	0.041054	-0.0727702	-0.171745	-0.229863	-0.225947	-0.198057	1.10976	0.985348	1.46949	1.50133	1.16239	1.26202	-0.0295615	-0.0646761	-0.844972	-0.842399	-0.755168	-1.99581	-1.99184	-1.91635	-0.167931	-0.131383	-0.266193	-0.734625	-0.642431	-0.155092	-0.0414964	0.52824	0.553329	1.05351	1.0715	1.6728	1.7974	1.57244
Cavin2	+	-0.721855	-0.808258	-0.741329	-0.730711	-0.729739	-0.824969	-0.377454	-0.294681	-0.248579	-0.340443	-0.41636	-0.393148	1.16199	1.18777	1.06141	1.02403	1.15056	1.1439	-0.499281	-0.508326	-0.551654	-0.5558	-0.586224	-0.547943	-0.656546	-0.641273	-1.13382	-1.13019	-1.21203	-1.14787	-1.03724	-0.504472	-0.489537	1.73635	1.62129	1.70772	1.66938	1.46892	1.44966	1.44677
Cavin3	+	-0.375837	-1.69687	-0.819509	-0.307421	-1.20854	-0.303554	-1.16635	-0.189332	-0.794748	-0.676726	-0.69834	-0.51432	-0.767306	-0.453403	-0.883473	-0.196229	-0.418321	-0.533471	-0.0254301	0.286353	-0.129377	-1.20069	-0.306685	0.0925581	0.486264	0.535596	0.0755259	0.449086	0.364842	-0.836204	-0.495781	0.110164	0.491087	1.23506	1.81026	1.23738	0.460053	2.57858	2.41467	2.37044
Cbfb	+	-0.52963	-0.477956	-0.179954	-0.531868	-0.3993	-0.583789	-0.297567	-0.414294	-0.884204	-0.540189	-0.262639	-0.0759514	-1.9308	-1.95109	-1.20381	-1.02483	-0.811516	-1.22999	1.19766	0.583841	0.91851	0.976247	0.91782	1.01129	1.15819	0.961552	0.123708	0.066653	-0.0286653	0.775076	0.857298	1.41933	1.51873	-1.15049	0.540819	-1.67417	-0.8885	1.38441	1.23494	1.42511
Cbl	+	-0.65657	-0.435683	-0.803861	-0.649775	-0.786824	-0.799408	-0.862951	-0.7862	-0.675977	-0.673029	-0.877302	-1.02228	-1.81003	-1.40253	-1.91692	-1.30328	-0.924875	-1.55216	0.824634	0.863535	0.776543	0.854613	0.934455	1.26756	1.21381	1.16412	0.606583	0.7716	0.943173	0.86987	0.857356	0.725258	0.777085	0.592981	0.332859	0.00693889	-0.30948	1.275	1.27112	1.32003
Cbr1	+	-0.492363	-0.293507	-0.278636	-0.294086	-0.350655	-0.322882	-0.110594	-0.0643082	-0.174087	-0.454263	-0.255332	-0.34779	-1.76456	-1.71883	-1.86366	-1.7035	-1.66725	-1.76454	0.916068	0.915477	1.02002	1.03179	1.01225	1.10788	1.16805	1.20851	0.854425	0.788612	0.849598	0.996641	0.9158	1.01579	1.06815	-0.676341	-0.455247	-1.0174	-1.06703	0.702744	0.852374	0.712693
Cbr2	+	0.545529	-1.46862	-1.22306	-1.23146	-1.72113	-1.77134	0.538399	0.546526	0.568357	0.596032	0.504846	0.386737	0.345972	0.498375	0.704389	0.3597	0.758303	-0.764008	0.767563	-0.499583	-0.735084	-1.44991	1.14869	0.872131	0.817796	-1.63975	-1.32407	-1.45651	-1.20358	0.488464	-1.48931	1.21458	1.19225	0.645364	0.35924	0.608191	0.813057	0.945352	0.805431	0.946149
Cbr3	+	0.126729	0.0694212	0.10585	0.166085	0.0774473	0.0577791	0.181964	0.187345	-0.088354	-0.0798983	0.109599	-0.0183158	-2.19039	-1.88741	-1.78944	-1.78755	-1.27337	-1.38097	1.08613	1.11156	0.969616	0.962189	0.949905	0.681081	0.646576	0.589755	1.29613	1.19991	1.12437	1.13233	1.21896	0.730273	0.708216	-0.832912	-0.763828	-1.41157	-1.62233	-0.0785592	-0.172259	-0.112063
Cbr4	+	1.46186	1.13884	0.558814	0.519445	0.877482	0.848079	1.26351	1.1255	1.503	1.38787	1.52382	1.36473	0.515166	0.211222	0.44651	0.126524	-0.241346	-0.296377	0.350644	0.121902	0.0272982	0.0713217	-0.082777	-0.0856253	-0.466761	-0.584178	-0.769954	-0.701898	-0.932911	-0.405602	-0.684871	0.256287	0.368188	-1.41198	-0.610795	-1.76295	-1.46073	-1.82366	-2.13145	-1.61413
Cbx1	+	-0.432641	-0.202905	0.52595	0.255957	-0.0556529	-0.88151	0.0467204	-0.116813	-0.341777	-0.366652	-0.46419	-0.284093	1.13629	1.50771	0.229959	0.274918	1.01426	1.67036	-0.711544	-0.176446	0.407157	0.549522	0.603374	0.457557	0.494027	0.797285	-2.83361	-2.56883	-2.74591	-0.165052	-0.184278	0.806685	0.455263	-0.48975	-0.298898	1.40213	1.22211	0.117292	-0.405589	-0.248372
Cbx2	+	0.249888	0.919457	-0.160521	0.749981	1.56283	1.46589	-0.951962	0.480198	0.788355	-0.239415	0.324358	-0.0768825	-1.55334	-0.27061	-0.627831	-1.64934	-0.962469	-0.0427241	-1.12465	-1.0595	-0.597965	0.543696	1.04854	0.24889	0.548564	0.871648	0.201417	0.429511	0.163778	0.209092	0.287034	0.47016	1.23495	-2.37824	1.43127	0.846606	-0.500372	0.142569	-2.89156	-0.131298
Cbx3	+	0.03731	0.164506	0.587053	0.395969	0.867731	0.817204	0.492478	0.535359	0.444381	0.624973	0.87176	0.756198	1.38902	1.26348	0.652964	0.23405	1.681	1.52665	0.535509	0.470583	-0.420986	-0.21512	-0.315104	-2.23029	-1.90661	-1.68031	0.430034	0.285279	0.577175	-0.42449	-0.317655	0.441058	0.264983	-1.61868	-1.90336	-0.853451	-0.875056	-1.19012	-1.14592	-1.24955
Cbx4	+	0.0404579	0.387292	0.548715	0.484869	0.243186	0.345837	0.166354	-0.182449	0.192705	-0.1418	0.0275341	-0.00990955	0.445904	0.64821	0.492439	0.62813	0.17248	0.38458	0.226666	0.155673	0.456232	0.40294	0.423034	0.423236	0.347819	0.827013	-2.20119	-3.77221	-2.26905	0.738833	0.529229	0.439054	0.467133	0.473143	-0.19805	0.869524	0.331461	-2.21579	0.473148	-1.80238
Cbx5	+	0.82756	0.995262	1.14618	1.05497	1.12996	0.961426	0.627354	0.457709	0.375957	0.417903	0.584941	0.759728	1.75619	1.61908	0.41735	0.211063	1.68154	1.76306	-0.122945	-0.369666	-0.764656	-0.545493	-0.777978	-0.425562	-0.534937	-0.609302	-0.507389	-0.816102	-0.6912	-0.70399	-0.567276	0.121422	0.199734	-1.77038	-1.19053	-1.09661	-1.4922	-1.98172	-1.22543	-0.915038
Cbx6	+	-0.160218	0.47512	-0.971139	-0.625862	-1.10561	-1.66893	0.163128	0.421245	-1.53317	-0.554056	0.436682	0.403875	0.835978	0.856246	1.36116	0.4114	0.826156	-1.39858	-1.70826	-0.602905	-0.950672	-1.72036	0.443547	-0.0605798	-0.792151	-0.818583	0.850338	-0.899412	1.21852	0.694898	-0.0174635	-1.04312	0.730013	1.42369	0.799784	0.840232	-0.868858	1.42538	1.54197	1.34057
Cbx8	+	0.654059	0.420711	0.0771471	-0.168176	-0.481358	0.167855	-0.419409	-0.134878	-1.00055	-0.321061	-0.0825057	0.220361	1.94352	1.4347	0.919459	1.19806	1.55823	1.12455	-1.87857	-1.71996	-1.25998	-1.36288	-0.845244	-0.669733	-0.339258	0.0172689	-0.407148	-0.889336	-0.233082	-1.82753	-1.28077	0.502029	-0.315425	0.546694	1.11905	2.04847	1.08829	0.669116	0.00129957	-0.0740111
Cc2d1a	+	-1.07951	0.0655043	-0.902712	-0.0325008	-0.848921	-1.44739	-0.346032	-1.40352	0.681038	-1.1554	-0.0869734	-0.853055	-0.727253	0.340398	-1.04117	-2.14045	-1.50942	-0.511052	0.570657	0.0680088	0.486411	0.0343676	0.545118	-0.153628	1.10817	1.63624	-1.01709	-0.432015	-0.14928	0.169647	-0.802116	0.951184	1.36476	1.14496	1.86897	1.03874	1.12742	1.24203	0.832588	1.36327
Cc2d1b	+	-0.809762	-0.942671	-0.275451	-0.675597	-0.54103	-0.244396	-0.872952	-0.803972	-0.401749	-0.896399	-0.848634	-0.442135	-0.457865	-1.25393	-2.63916	-2.67655	-0.374446	-0.418498	1.3402	0.909825	0.950928	0.732763	1.07032	1.08458	1.08945	1.21309	0.762814	1.12689	0.580403	1.03822	0.730528	1.08638	1.07995	0.309272	-0.0723455	-0.686351	-0.438347	0.828096	0.243359	0.595158
Ccar1	+	0.766963	0.86264	1.23117	1.18374	0.541994	0.484864	0.511244	0.552527	0.369176	0.275134	0.333814	0.424214	0.985229	1.32825	0.747232	0.831741	1.38836	1.03328	-1.38932	-1.20412	-0.626314	-0.805276	-0.567541	0.101775	0.202475	0.560016	-2.05622	-2.21239	-2.33758	-1.6601	-1.62643	0.117967	-0.15344	-0.820095	0.213307	0.196088	0.460894	0.0338041	-0.259622	-0.0194596
Ccar2	+	1.59063	1.68422	0.454009	0.021595	0.661997	1.2894	1.36291	1.21269	0.719426	1.15407	1.31943	0.97262	0.789868	0.818574	0.236337	0.573259	0.291589	-0.501593	-0.23321	-0.760239	-0.988241	-1.13598	-0.993259	-0.586817	-0.663782	-1.05755	0.38385	-0.00696052	0.884829	-0.864105	-0.328401	-0.595235	0.0298625	-0.763806	-0.221791	-0.110056	-0.527245	-1.9281	-2.33788	-1.84691
Ccdc102a	+	-0.994645	-0.782644	-1.43741	-0.916175	-1.83024	-0.941333	-0.560983	-0.536018	-1.03931	-1.04799	-0.981716	-1.35991	1.49663	1.35661	1.34724	1.27529	0.965219	1.09697	-0.0476809	-0.0780204	-0.133971	-0.379912	-0.282491	-0.161787	-0.00602618	0.233885	-0.614674	-1.07605	-0.691791	-0.58716	-0.622093	0.0222742	0.29066	1.17571	1.14697	1.09256	1.15718	1.43129	1.51365	1.50789
Ccdc115	+	0.487309	0.748875	0.410753	0.453226	0.767116	0.660369	1.06359	0.576114	0.490386	0.580736	1.27989	0.9741	0.0102651	0.0814373	0.270725	0.125808	0.125765	-0.810321	0.474349	0.0834146	-2.06215	-0.485571	-0.974695	-0.342841	-0.0485649	0.104783	0.877522	0.780708	0.650214	0.138765	-0.154095	-1.14947	-1.02945	0.919038	0.428888	-2.8842	-3.46444	0.0308488	-0.16886	-0.0203413
Ccdc12	+	0.678514	0.940353	-0.163115	0.468411	0.845286	0.814896	0.0988428	0.228486	0.632777	0.758052	0.334518	0.702703	0.905576	0.719994	-0.13565	0.242224	1.10672	1.10833	0.577872	0.845658	-1.23789	-1.19391	-1.71773	-1.64142	-1.70535	-0.168843	1.21837	1.47925	1.95994	-0.568666	0.400885	-0.794268	-0.595196	-1.14499	-1.80792	-0.647086	-0.865033	-1.51912	-0.911521	-0.249965
Ccdc124	+	-1.64537	-1.21321	-1.49006	-1.15314	-1.49549	-1.18574	-1.06029	-1.19977	-1.7655	-1.11057	-1.51907	-1.08829	0.618853	0.258738	0.2807	0.347885	0.673056	0.827578	0.159507	0.478077	0.656443	0.657626	0.572725	0.392228	0.626827	0.395267	0.132008	0.0060629	-0.242647	0.476307	0.550947	0.313979	0.0574069	0.630789	0.212733	0.717759	0.248597	2.01173	1.79087	2.07445
Ccdc127	+	-0.192646	0.0334505	1.42105	2.38662	0.512679	0.510061	0.624549	1.20251	0.0149473	0.287884	0.528717	-0.494087	0.728761	-0.286195	1.74938	1.55951	0.678255	0.572451	-0.600364	-0.113906	-0.637429	-0.314728	0.321763	-0.124009	-0.476522	0.307653	-0.99867	-0.897455	-0.810409	-0.317725	-2.10285	0.0860435	0.537605	-1.68434	-0.479846	-0.918199	1.19588	0.0133981	-2.17446	-1.64932
Ccdc134	+	0.475054	0.712873	0.486618	-2.26551	1.00622	0.542734	0.836495	0.550543	0.487471	0.940852	0.584203	0.858098	0.647828	0.640128	0.398711	0.606305	0.518692	0.748186	0.583688	0.687613	0.102504	-0.199851	0.230116	-1.68802	-1.40591	-2.29763	0.513224	0.283314	0.691278	0.211211	-0.657748	0.512544	-1.4355	0.23746	0.0403731	0.461996	-0.227858	-0.853053	-2.07566	-2.48959
Ccdc136	+	-1.13662	-1.29776	-1.0619	-1.02222	-2.15985	-0.580913	-0.432812	0.18719	-0.477252	-1.44085	-1.01063	-0.727763	-0.530755	-0.60152	0.41932	0.293463	0.350638	-0.213086	0.710929	0.542168	0.859757	0.719228	0.469656	0.395782	0.113759	0.194921	-1.2241	2.1824	-0.756295	1.40124	1.5354	0.816449	0.755696	-0.730092	-0.637366	-0.172631	-0.505714	1.58765	1.53752	1.64699
Ccdc137	+	1.61422	2.21593	2.45634	1.81753	0.503597	0.923805	0.105388	0.321932	-0.050741	-0.820835	-0.11364	-0.161843	-0.84888	-0.361183	-0.675402	-1.20969	0.605305	1.12403	-1.51605	-1.00079	-1.14423	-1.21567	-1.26423	0.186535	-0.635188	0.656429	-0.279137	-0.332419	-0.482031	-0.291674	-0.34725	0.501961	-0.519436	1.02825	0.916509	0.467082	0.827946	-0.949432	-0.641294	-1.41172
Ccdc14	+	-1.37396	-0.124869	-0.216496	0.0982284	-1.1634	0.121216	-0.220145	-0.0679115	-0.431455	0.26484	0.0234344	0.192473	0.967361	0.774077	1.11387	1.18597	0.908189	0.879908	-1.25491	-2.71271	-0.368597	-1.53704	-0.445107	0.0652755	-1.1183	-1.37248	1.25837	1.44441	1.52808	0.834845	0.210907	-1.27735	-1.96122	0.664648	0.715173	0.829315	0.862864	0.25598	0.229624	0.216906
Ccdc167	+	0.976066	0.968879	0.676475	0.693546	-0.193659	0.55193	-0.124171	0.136497	0.358019	0.430247	0.477253	0.331463	1.96944	1.43757	0.871219	1.05511	2.43384	1.49097	-0.0205691	-0.817685	-0.690943	-0.813339	-0.349969	-0.757466	-1.46984	-1.84455	-1.2823	-1.27697	-0.686968	-0.948393	-1.6757	-0.919842	0.196191	0.414869	-0.0722565	-0.158631	0.449901	-1.02258	0.312853	-1.10651
Ccdc174	+	-0.526327	-0.851587	-1.23564	-1.00562	-0.984347	-1.09123	-0.972066	-0.736369	-0.702797	-0.718037	-1.54644	-1.01797	-0.878575	-1.34448	-1.56056	-1.17111	-0.00520663	-0.0336969	0.800526	0.480237	1.28614	1.02174	1.03935	1.57673	1.6411	1.8259	0.250203	0.260794	0.0543484	1.13379	0.819145	1.32912	1.14323	-0.155433	-0.45969	-0.388625	0.144751	0.819137	1.01203	0.747542
Ccdc186	+	-0.33045	-0.413604	-0.191141	0.0956204	-0.554527	-0.044571	-0.371315	-0.132892	-0.530531	-0.610156	-0.776724	-0.531236	-1.18583	-0.496729	-2.01614	-1.11738	-0.0645449	-3.75177	0.798481	0.473254	0.824201	1.01919	1.05457	1.36612	1.20263	1.39407	0.361608	1.0575	0.138678	0.852443	0.716326	0.877842	0.839151	-0.688565	0.636615	-0.361492	-0.892072	0.70107	0.628442	0.0238635
Ccdc22	+	-1.2482	-0.603238	-0.351589	-0.568215	-0.846794	-1.21027	-0.380554	-0.506538	-1.17441	-0.388082	-0.839667	-1.01659	-1.3262	-1.04646	-1.35342	-2.57133	-0.442524	-0.522854	0.974986	0.916016	0.879512	0.790618	0.819284	1.12761	0.931719	1.03103	0.859677	0.859037	0.482586	1.07901	0.878357	0.921055	0.961361	-0.157419	-0.383353	-0.821399	0.153964	1.23399	1.26753	1.59176
Ccdc25	+	-0.153777	-0.209477	-0.528017	-0.267392	-0.315863	-0.519955	-0.707018	-0.63508	-0.309057	-0.547692	-0.613491	-0.534785	-1.7311	-1.95969	-2.00679	-1.79498	-1.3048	-0.920013	1.14647	1.25131	1.12976	1.19662	1.28971	1.41411	1.33234	1.26453	0.460971	0.528875	0.413322	0.990177	1.06592	0.947167	1.07303	-0.561368	-0.418888	-0.780954	-0.322969	0.39461	0.739082	0.505145
Ccdc34	+	0.00985153	0.284474	1.26405	0.719094	0.814541	0.973385	2.01616	-1.11834	-0.823415	-0.671144	0.567704	0.581161	0.5172	-0.159709	-1.73155	-0.277601	1.34424	-1.33087	-0.759407	-0.0189659	-0.350327	-0.602166	0.139715	-0.152635	0.0961322	0.773636	-0.456123	-1.65836	-0.982913	-1.31877	-0.583005	-1.58865	-1.05866	1.81129	0.558851	2.3679	0.375279	-0.359443	0.421661	0.36573
Ccdc43	+	-0.41228	-0.197798	-1.31759	-0.564754	-1.04839	-0.277454	-1.51547	-1.04093	-0.295181	-0.115542	-1.27874	-1.00188	-1.22645	-0.815644	-1.84378	-1.94989	-0.990179	-0.837973	1.03905	1.07913	0.934218	1.01259	1.50447	1.53711	1.47281	1.57961	-0.0756371	-0.072889	0.179785	0.389197	0.733208	0.758265	1.00676	0.763447	0.284532	0.156403	0.191457	0.381283	0.984811	0.890321
Ccdc47	+	0.727698	0.956173	0.806509	0.607293	1.02388	0.825476	0.895567	0.877107	0.840023	0.900214	0.888564	0.955633	1.29935	1.29667	1.38267	1.34395	1.02624	1.17383	-0.224872	-0.201299	-0.561529	-0.499675	-0.398529	-0.994376	-0.757257	-0.943909	-0.609672	-0.860025	-0.875796	-0.973343	-0.831505	-0.117596	-0.256571	-1.03002	-0.827629	-0.39482	-0.647524	-1.84778	-2.03757	-1.93555
Ccdc50	+	-0.101587	-0.376319	-0.247481	0.0855021	-0.28187	-0.376049	-0.222853	-0.231319	0.0370284	-0.0440351	-0.213249	-0.555434	-1.03713	-0.519742	-1.62562	-1.92699	-0.59922	-0.707616	1.32483	1.26929	0.95678	0.982808	0.838514	1.06858	0.721841	0.619087	1.42036	1.39053	1.31341	1.39781	1.37951	0.986838	0.923905	-1.97901	-1.10188	-1.53054	-1.29399	-0.686068	-0.509083	-0.549534
Ccdc51	+	1.4985	1.42123	1.60391	1.53368	1.36133	1.33427	0.992089	0.999077	0.958948	1.05006	0.832238	1.00619	-0.56092	-0.538332	-0.545719	-0.419495	-0.684688	-0.700965	0.0274869	-0.156164	-0.131783	-0.0465669	-0.00154199	0.39149	-0.00216544	-0.19113	-0.626753	-0.505286	-0.784805	-0.402984	-0.282185	0.554648	0.633739	-1.23282	-0.819767	-0.651274	-0.717076	-1.88364	-2.15948	-2.15336
Ccdc59	+	1.57521	2.12549	1.36538	1.45802	1.1078	1.01348	0.414311	0.551099	0.83823	1.06641	0.483881	0.784678	-0.220575	-1.03166	-1.24972	-1.02693	-2.45199	-1.12497	0.136938	-0.192964	-0.148605	-0.00677003	-0.381162	0.281949	0.18934	0.580425	-0.174651	-0.130688	0.0477468	0.532169	0.620527	0.250861	0.0369816	-0.784167	-0.394221	-1.36553	-1.75966	-0.431179	-1.95098	-0.634489
Ccdc6	+	-0.0883219	-0.478413	-1.05303	-0.988195	-0.626038	-0.500322	-0.244241	-0.126532	0.278647	0.172479	-0.080218	0.0768871	-0.961486	-1.19392	-2.49818	-1.86831	-2.07645	-2.25041	1.42963	1.10272	0.839136	0.874016	1.0821	1.20696	0.708537	1.0319	0.344522	0.24241	0.317862	0.442211	0.543443	1.1509	1.2956	-0.00843783	0.460303	-0.20155	-0.315429	0.496306	0.632674	0.830232
Ccdc61	+	0.654291	0.796178	0.361499	0.508444	0.853791	0.650704	0.883366	0.390417	0.905364	0.511982	0.748391	0.693092	0.00755588	-0.508099	-0.249889	-0.402032	0.193526	0.393911	0.0631026	0.382213	0.439038	0.47942	0.432546	0.928667	0.662582	1.0064	-0.764397	-1.11764	-1.10347	-0.0935348	-0.0431448	1.21802	1.06142	-1.9509	0.49734	-0.762072	-1.94281	-2.38104	-1.93383	-2.47042
Ccdc71	+	0.585656	0.351957	-0.294701	-0.0108883	0.297067	0.0699789	0.92771	0.81315	0.215336	1.14728	0.860673	0.600676	-0.632275	-0.811015	-1.3142	-1.0235	-1.71245	-1.70627	1.05129	1.33692	0.175462	0.0455225	0.699329	-0.662434	-0.974313	-0.617641	1.72004	1.7098	1.14924	1.03926	1.2801	0.124034	0.0805176	-2.11089	-1.72647	-0.335049	-1.24709	-0.257171	-0.286917	-0.557728
Ccdc8	+	0.279257	1.37332	0.317352	1.39683	0.072967	0.43994	0.814525	-2.19569	-0.0793305	-0.227102	-0.004005	0.599885	1.3377	-0.448525	-0.77031	0.165929	0.111637	0.23957	-0.898715	1.20956	0.839949	-0.923234	0.466346	0.667108	-0.132227	0.83349	-1.43168	0.283333	-2.25933	1.17077	-2.50084	-0.168051	-0.0678782	0.0583112	1.61956	-0.597289	-1.758	0.0479407	-0.049295	0.166239
Ccdc80	+	-0.0930351	-2.41503	-0.0809504	0.950328	-1.86178	-1.24373	0.257896	-0.43076	0.380804	0.903285	-0.995279	0.0241138	0.468369	1.0177	1.13899	0.908335	0.786579	0.69215	0.568238	-0.483363	0.269375	0.097169	-1.23711	-0.641057	0.714819	0.599013	-1.38583	-0.650808	-0.181296	-0.805316	-0.359555	-2.60055	-0.489552	0.456355	0.286195	0.706929	1.74399	0.769526	0.915846	1.29901
Ccdc86	+	1.67071	1.72451	1.98719	1.90664	1.37731	1.31273	0.878204	0.943667	0.821061	0.92149	0.682741	0.725006	0.128356	0.402977	-0.166408	0.0968158	0.278491	0.35037	-0.733993	-0.654546	-0.713692	-0.993643	-0.697683	-0.630939	-0.576256	-0.878529	-0.622321	-0.459751	-0.684104	-0.10131	-0.0553267	-0.836472	-0.799099	-0.572219	-0.337273	-0.127975	-0.081039	-1.74335	-1.69718	-2.04516
Ccdc88a	+	-1.4194	-0.68425	-1.30601	-0.809982	-0.97456	-1.48505	-1.1907	-1.10592	-1.57232	-1.40231	-1.6833	-1.25137	-0.379691	-0.124354	-1.02457	-0.66849	0.0229558	0.379668	0.564079	0.353182	0.549815	0.584616	0.538674	0.448251	0.579051	0.866922	0.0759455	0.438555	0.303088	0.330918	0.339061	0.84347	0.84484	1.08271	0.72372	0.711589	1.12176	1.82818	1.83627	1.71493
Ccdc88c	+	-1.49749	-0.378631	-0.760473	-1.16055	-1.11803	-0.200554	-0.913121	-0.112644	-0.443485	-0.841689	-2.16025	-0.625151	-0.218626	0.0865772	1.00553	-1.74454	-0.0784655	-2.02363	1.00272	0.560097	1.33602	0.908165	1.53689	0.79187	0.763392	1.48175	0.320948	0.803648	0.533469	1.23052	0.436365	0.774345	1.04519	1.24287	0.481268	0.252803	-0.265696	0.0830013	-0.898937	-1.23549
Ccdc9	+	0.218359	-0.0872599	0.341078	0.36913	0.126845	0.108936	0.0442442	0.0780696	-0.168771	-0.371897	-0.281052	-0.184825	-1.34704	-1.31142	-1.95936	-2.11773	-1.6583	-1.64475	1.1435	0.867362	0.966642	1.06616	1.0654	1.10034	0.891656	0.910717	0.969826	0.951407	0.819324	1.2793	1.24301	0.889228	0.886039	-0.760409	-0.670361	-1.40929	-1.56685	-0.216902	-0.252816	-0.327535
Ccdc90b	+	0.945901	0.700174	0.0787984	0.545701	0.700316	0.483104	1.11539	1.21971	0.922552	0.987365	0.985065	0.69107	0.121133	0.783266	0.226721	-0.0600623	0.12907	0.0523593	0.0774463	-0.318417	-0.855246	-0.377228	-1.06719	-1.0933	-1.75487	-1.00956	-0.0942773	-0.0419059	0.154448	-0.0859053	-0.565898	-0.520982	-1.7963	1.79885	-2.64619	-2.18274	-0.42735	0.231515	1.83091	0.116552
Ccdc92	+	-1.18733	0.0906319	-0.976685	-0.101908	-0.776058	-0.885855	-2.21602	1.05238	-0.478157	-0.138473	-1.49146	-1.04383	-1.37547	-2.03203	0.254006	0.22551	-0.216675	0.0897508	1.06925	1.32149	0.441401	0.756378	0.840552	0.703942	1.28211	0.396581	1.02309	1.46979	1.49479	1.11491	0.578789	-0.034041	0.650769	0.50926	0.0579927	-1.20786	-0.24331	-0.261468	0.890462	-1.6472
Ccdc93	+	-0.215538	-0.131825	-0.228463	-0.746172	-0.8726	-0.392233	-0.322362	-0.184397	-0.0995581	-0.81906	-0.574618	-0.0997599	-1.39704	-1.53034	-1.9268	-1.3632	-1.92182	-1.59485	1.09333	1.17699	1.06138	1.39592	1.28988	1.02241	0.76813	1.08391	0.168059	0.162106	0.117914	0.646484	0.936188	1.35312	1.50668	-0.823292	-0.905669	-0.191722	-0.376407	1.04877	0.909687	0.976753
Ccdc97	+	0.083332	-0.932444	1.79462	0.231447	0.439011	0.42427	-0.0761093	1.38401	-0.150063	0.00968902	0.0556554	-0.206458	-2.05151	-1.69914	-1.6192	-2.57733	-1.38627	-1.88308	0.978201	0.872336	0.145308	-0.028993	-0.0781031	-0.513723	0.387182	-0.401699	0.879477	0.952005	0.633596	0.579107	0.806219	0.057743	-1.28305	-0.136338	0.384014	0.245246	0.863226	0.944819	0.98016	0.892837
Ccdc9b	+	1.00884	-0.623824	-0.853795	-0.234171	-0.59253	-0.32379	-0.684709	-0.655355	-0.766989	-0.83619	-0.667021	1.061	-0.100493	1.28159	-0.686268	1.12062	-0.549413	-0.730894	1.4568	1.48282	-0.814779	-0.833698	-0.311599	1.47628	-0.424072	-0.483172	-1.80118	-1.12079	-1.33297	-0.196551	-0.337314	-0.239153	-0.568282	1.46577	-0.598519	1.09515	1.55622	1.8715	0.761079	1.72986
Ccl2	+	0.215843	-0.885671	-0.360015	-0.394538	-0.549849	-0.841504	0.765019	0.856726	-0.770985	0.513218	0.935306	0.630837	1.89621	1.6924	2.37751	2.46974	1.30276	1.36824	-0.615357	-0.344445	-0.0627391	-1.53393	-1.08644	-1.46832	-0.627928	-0.0784665	-0.992165	-0.0441839	-1.05553	-0.477659	-0.289008	-0.993595	0.765854	-0.103427	-0.0591329	-0.362554	-0.640965	-0.35515	-0.579398	-0.216719
Ccl7	+	-0.392554	0.0506658	-0.681313	-0.42133	-0.377616	-1.01281	-1.03487	-1.33618	0.843382	0.137534	0.231115	0.62856	1.56291	1.59282	1.53558	1.4074	0.6204	1.32557	-0.0924992	-1.03797	-0.89117	0.0754396	-1.00339	-2.63883	-1.44539	0.803132	-0.511048	1.51078	0.305685	-0.614872	0.720546	0.667883	0.176157	0.442523	1.05878	-1.00849	0.760881	-0.398342	-1.34924	-0.209835
Ccm2	+	-1.52462	0.200074	-0.229021	-1.94199	-1.09939	0.0288748	0.0742696	-0.267181	0.36876	0.539261	0.494303	0.850846	-0.570528	-0.215294	-1.09433	-0.703453	0.0787846	-1.67851	0.192348	0.685785	0.0088071	-1.92049	-0.012665	-0.611842	-1.97448	-0.408737	0.391939	0.392882	0.636793	-0.173184	-0.245788	0.192865	0.443068	1.98457	1.78125	2.21986	1.68312	0.595762	0.410924	0.41636
Ccn1	+	-0.570613	-0.469938	-0.465876	-0.441761	-0.532453	-0.512605	-0.304379	-0.280806	-0.306459	-0.237007	-0.43272	-0.277765	1.28046	1.28865	1.26558	1.23256	1.15013	1.13822	-0.560088	-0.760745	-0.549878	-0.679005	-0.599135	-0.582249	-0.395249	-0.433381	-1.2411	-1.16582	-1.28129	-0.93329	-1.07494	-1.11472	-1.44474	1.55329	1.57144	1.61053	1.6214	1.2511	1.32726	1.35739
Ccn2	+	-0.81523	-0.904731	-0.661006	-0.688866	-0.80902	-0.592704	-0.383685	-0.371114	-0.205195	-0.204898	-0.259196	-0.352105	1.36235	1.3734	1.4367	1.40104	1.11164	1.09886	-0.792247	-0.519604	-0.457021	-0.460135	-0.511018	-0.23563	-0.0564096	-0.141127	-0.976224	-1.00714	-1.17025	-1.40576	-1.40139	-0.844912	-1.27334	1.4629	1.42156	1.2229	1.2411	1.45978	1.48246	1.42527
Ccn4	+	-0.00678279	-0.894741	0.0178652	0.0256181	-1.33214	-1.4447	0.211625	0.723516	0.379493	0.413247	0.806338	0.509609	1.13279	1.23326	1.28478	1.32945	0.978333	0.931801	-1.25533	-1.01907	-1.28119	-1.50158	-1.07415	-1.53866	-1.59476	-1.24363	-0.303066	-1.32664	-0.406527	-1.35349	0.540083	0.390414	0.171626	0.980379	0.95762	1.01452	0.869983	0.924847	0.841062	0.908179
Ccna2	+	-0.404447	0.325662	-0.032759	0.079914	-0.349509	-0.14651	-0.361686	-0.0339878	-0.729539	-0.722973	-0.543373	-0.917003	-0.673394	-0.711586	-2.58473	-2.33863	-0.264315	-0.0287022	0.373558	-0.0313465	0.0582715	-0.384229	0.175531	-0.402085	-0.51224	-0.997315	2.03431	1.80781	1.73366	1.48339	1.46141	0.424586	0.607023	-0.195295	-0.506873	0.0758632	-0.722007	1.31268	1.37179	1.26908
Ccnb1	+	0.125194	0.377127	0.179442	0.23033	0.0165683	0.107088	-0.00722278	0.0912727	-0.331251	-1.00052	-0.621336	-0.585164	-1.36353	-1.41562	-2.29613	-2.69036	-1.24708	-1.18426	0.199914	0.366175	0.391706	0.226585	0.616523	-0.155246	-0.11965	-0.0190094	1.4364	1.38647	1.346	1.94045	1.67819	1.01617	1.01898	-0.653788	-0.49286	-0.477693	-0.139372	0.698562	0.68812	0.662822
Ccnd1	+	-1.4887	-1.51389	-0.443229	-1.1975	-1.03519	-1.07577	-0.405038	-0.24384	-1.53402	-1.02782	-0.989426	-1.57868	-0.714777	-1.583	-0.65969	-1.13847	1.14507	0.532095	0.792695	0.728442	1.33116	0.888527	1.27237	-0.546101	0.383899	-0.159635	1.12231	1.70339	1.0737	1.16485	0.469152	0.858897	0.782731	0.420446	-0.132594	-0.367521	0.406514	0.817466	0.762065	1.17911
Ccnd2	+	-1.0436	-0.598508	-1.13907	-2.48742	-1.67641	-0.658214	0.607065	0.640305	0.353314	0.016929	0.245724	0.757106	-1.72575	-0.393464	-0.280346	-1.91404	-1.75939	-1.6006	1.27865	1.06846	0.598505	-0.313571	0.508263	0.0842038	1.13912	0.79406	0.725656	0.680109	0.609188	0.63712	1.04931	0.456983	-0.452656	-0.157712	0.219488	1.49874	1.14615	0.404673	0.24582	0.435801
Ccnd3	+	-1.54166	-0.222055	-0.399344	-0.205267	-0.724412	-1.29523	0.679174	0.865499	-0.0539826	0.183674	0.225545	0.71922	-0.679998	-0.565097	-0.506391	-3.42225	-0.779434	-1.15628	1.40549	1.06963	1.21952	0.911073	0.726519	-0.0513576	0.79318	1.50829	0.150147	0.0355848	0.867181	-0.188554	-0.679794	0.958899	0.294703	-1.81931	0.436478	0.509108	1.39793	0.29456	-0.129116	-0.831866
Ccne1	+	-0.138243	-2.33605	0.22658	0.267439	0.318278	0.176978	0.425871	0.817532	-0.0439396	0.491226	0.895862	0.376179	-0.12009	-2.56668	-0.172275	-1.25783	-1.76395	-1.44241	1.48611	0.0852267	0.899833	0.967336	1.42638	-0.249645	-0.147637	-0.441541	-0.324404	-0.773217	-2.10867	0.583049	0.443879	0.231936	1.59328	1.41398	-0.228279	-0.363989	0.408387	0.73152	-0.320083	0.532068
Ccnh	+	0.436134	0.708407	0.490433	0.698424	0.460848	0.566523	0.406132	0.414223	0.131129	0.235139	0.175625	0.171317	-2.21877	-1.41543	-1.88601	-2.28638	-2.28278	-1.72137	0.473465	0.457727	0.628269	0.788373	0.605041	0.70928	0.390222	0.207702	0.768059	0.785558	0.553944	1.22064	1.21975	1.29119	0.973098	-1.15758	-0.450158	-0.917024	-0.419133	-0.525298	-0.32364	-0.363089
Ccnk	+	-1.29517	1.19939	1.40599	0.419746	0.0270744	0.403652	0.125984	0.569657	-0.146509	1.53265	-0.418197	-0.827816	0.359025	0.869894	0.902844	1.65458	1.23741	1.56448	-1.38646	-1.66355	-2.22001	-0.468222	0.353813	-1.13706	-0.638741	-0.412319	-0.589398	0.358546	0.152924	-1.27409	0.0911314	-0.377844	0.253214	-0.387783	-0.52315	0.161381	-0.327712	0.759222	1.61014	-1.91871
Ccnt1	+	1.5589	0.428013	-0.088335	1.33729	-0.192267	0.628278	0.794897	0.122254	-0.53835	-1.00844	-1.06749	-0.377884	-0.951814	-1.57986	-1.56685	-0.14341	0.591485	0.261585	0.159291	0.0648	0.362191	-0.228306	0.60461	1.96516	-0.411198	0.939524	0.88949	1.0555	0.960646	0.80746	0.918403	0.487424	0.952151	-0.84178	-0.876309	-0.814197	-0.831238	-0.981482	-3.13158	-0.258562
Ccnyl1	+	0.0198941	-0.330476	0.545817	1.03276	-0.0225944	0.204106	-0.0125929	0.117367	0.317451	0.349009	0.885142	-0.239786	0.367539	0.965711	1.1195	1.29182	0.11785	-2.12998	-0.0201747	0.19676	-2.30184	-0.527733	-0.0766374	-1.11313	-0.60266	-0.796664	0.552241	0.56705	0.798352	1.66576	1.62999	-1.34764	-0.293557	0.236394	0.430938	-3.07035	0.903846	-0.448214	-0.837869	-0.14341
Ccs	+	-0.489253	-0.461083	-0.993071	-0.599197	-0.246407	-0.275356	-0.0678174	0.17986	-0.384749	-0.16813	-0.175411	-0.0426536	-2.24575	-2.10431	-1.26321	-1.58387	-0.320124	-1.48366	1.24573	1.16409	1.40911	1.43445	1.4505	1.52986	1.3764	1.42727	-0.517395	-0.241711	-0.303656	0.104226	-0.177365	0.983451	1.32461	0.0820407	0.685259	-0.384074	-1.12485	0.363575	0.36739	0.525272
Ccsmst1	+	0.825003	0.574339	0.0481349	0.44288	0.527186	0.569819	0.373789	0.573465	-0.922562	-0.819346	0.638304	0.773566	0.414374	0.113825	0.858375	0.31906	0.930644	0.856139	-0.704704	-0.53099	-1.7099	-0.762909	-0.324538	-0.786544	-0.0366114	-0.995378	-1.72284	-1.3854	-1.38783	-1.14824	-1.61167	-0.652109	-0.986858	2.05902	2.39871	-0.0188306	0.141728	1.23113	0.585788	1.25198
Cct2	+	-0.173429	-0.196305	0.0181569	-0.124721	0.00517952	-0.0633711	0.204082	0.21968	0.0176285	0.123956	0.0995441	0.231453	-1.47196	-1.49819	-1.47995	-1.49515	-1.30661	-1.35102	1.29685	1.29857	0.891941	0.895541	0.833212	0.094327	0.122085	0.0109109	1.71839	1.70299	1.5652	1.30816	1.37645	0.595669	0.600369	-1.58078	-1.29951	-1.38125	-1.38131	-0.151106	-0.157951	-0.11774
Cct3	+	-0.194531	-0.240772	-0.279953	-0.269571	-0.104903	-0.301552	0.0612288	-0.0190388	-0.0934185	-0.101746	0.0339772	-0.0568345	-1.68805	-1.64056	-1.7269	-1.72348	-1.24123	-1.46435	1.32091	1.3809	0.894662	1.05312	0.934395	0.572035	0.456408	0.458422	1.54806	1.40328	1.53059	1.10737	1.19244	0.79635	0.693701	-1.06484	-1.43661	-1.22987	-1.00602	0.104888	0.198885	0.142599
Cct4	+	0.162081	0.00848628	-0.430535	-0.617276	0.00430088	-0.0627006	0.265101	0.0805751	0.486791	0.531553	0.517889	0.448777	-1.4121	-1.45599	-1.76466	-1.87343	-1.63967	-1.73728	1.44335	1.45865	0.816129	0.903629	0.832683	0.181296	0.232314	0.241678	1.334	1.36155	1.16326	1.37529	1.36981	0.61731	0.430665	-1.2433	-0.986747	-0.949718	-1.14604	-0.333474	-0.255418	-0.358831
Cct5	+	-0.380254	-0.507847	-0.161567	-0.0945748	-0.234535	-0.396958	0.169505	0.202895	0.00721373	0.0265774	0.0366381	-0.197793	-1.60339	-1.44163	-1.36627	-1.34713	-1.66867	-1.78589	0.998342	1.13783	0.801131	0.721223	0.760757	0.0568007	0.0566469	0.0361204	1.95963	1.8414	1.96549	1.33311	1.45877	0.549328	0.587392	-0.836662	-0.926761	-1.15068	-1.12808	0.181153	0.13876	0.201987
Cct6a	+	-0.192233	-0.347576	0.00553523	-0.111884	-0.10105	-0.165675	0.15521	0.131655	-0.192573	0.130327	0.194161	0.0462258	-1.72413	-1.59861	-1.41658	-1.36567	-1.01377	-1.26979	1.20815	1.1929	0.86518	0.908713	0.862009	0.0932223	0.0160857	0.0389167	1.70278	1.6084	1.51311	1.39661	1.65795	0.487063	0.53076	-1.44863	-1.57108	-0.967132	-1.68588	0.0760154	0.165362	0.185932
Cct7	+	-0.227368	-0.31065	-0.329295	-0.366436	0.0285329	-0.0435376	0.0977457	0.000777816	0.253403	0.185592	0.151362	0.183088	-1.55406	-1.6415	-1.90474	-2.03977	-1.68554	-1.49226	1.3485	1.31437	1.16572	1.08336	1.03566	0.433347	0.500133	0.421095	1.19811	1.06363	1.09591	1.18802	1.34039	0.651282	0.686927	-1.16606	-1.03426	-1.0984	-1.05282	0.140744	0.163845	0.215148
Cct8	+	0.0567643	-0.144869	-0.266861	-0.239314	0.0489628	-0.0417818	0.355025	0.336206	0.220036	0.240977	0.323894	0.375323	-1.64336	-1.60122	-1.7245	-1.60412	-1.56244	-1.59187	1.29026	1.29904	0.917684	0.867141	0.787988	0.157542	0.144305	0.0980857	1.5174	1.41491	1.40133	1.21909	1.30077	0.620975	0.520351	-1.26705	-1.4809	-1.22399	-1.20018	0.0231093	0.0127912	0.042521
Ccz1	+	-0.842383	0.216354	0.332102	-0.33734	-0.881121	-0.201531	-0.243932	-0.184826	-0.367989	-0.898426	0.4517	0.222326	1.41486	-0.932167	0.316324	0.475284	-0.627116	-0.345318	0.436013	0.39547	0.702499	0.175418	0.349652	0.819663	-0.108589	0.932032	0.283154	-0.102843	0.659743	0.636611	0.437079	0.921236	1.28888	-0.76401	-4.91812	-0.538302	-0.292486	0.162961	0.0345112	0.922629
Cd109	+	0.987876	1.05546	0.660988	0.580003	0.802264	0.854993	0.995157	1.04953	1.10063	0.912095	0.924921	0.952521	-0.0691029	0.0231167	-0.0790562	-0.155107	-0.0917892	-0.129493	0.510878	0.535997	0.290098	0.219302	0.118769	0.0330269	0.171423	0.117244	-1.95116	-2.04836	-2.09155	-1.81201	-1.91178	0.884972	0.734603	-0.0152439	-0.00538742	0.0948198	0.404111	-1.47116	-1.48804	-1.69557
Cd151	+	-0.123176	0.0373783	-0.988693	-0.855731	-0.2936	-0.0217095	-0.146249	-0.058671	0.227462	0.372158	0.542858	0.736437	1.85668	2.30581	1.48071	1.71962	0.501338	0.613626	-0.372436	-0.455752	0.0861069	-0.00953466	-0.259566	-0.00509288	-0.0892343	-0.419698	-1.16787	-1.65733	-2.83368	-1.09741	-1.20892	-0.400931	-0.431179	0.803214	0.297099	1.60531	1.2168	-0.126361	-0.884959	-0.49483
Cd248	+	-0.122519	-0.381549	-0.351878	-0.641288	-0.807648	-0.402838	0.263251	0.232307	0.183548	0.207331	0.238861	0.209895	1.5643	1.5566	1.69851	1.72946	1.1473	1.21768	-0.343432	-0.47278	-0.810771	-0.827509	-0.700921	-2.05244	-0.706946	-1.00984	-2.16891	-0.88442	-0.975974	-0.845152	-0.775353	-0.499038	-0.394172	1.26421	1.20907	1.55365	1.42293	0.201977	0.117173	0.157315
Cd2ap	+	-0.254811	-0.159433	-0.711239	-0.744994	-0.947236	-0.502863	-0.769469	-0.56056	-0.562875	-0.451403	-0.550544	-0.557739	-0.692377	-1.19589	-2.70164	-2.19633	-1.20011	-1.41153	1.21044	1.05526	1.1429	1.21845	1.15112	1.35273	1.2714	1.35214	0.623935	0.708493	0.621942	0.96897	1.10979	0.937986	0.881897	0.127823	-0.039576	-0.006979	0.0148747	0.173693	0.0335349	0.260212
Cd2bp2	+	0.819497	1.60312	0.694888	1.16871	0.421786	0.708574	0.563982	-0.400792	0.0635573	0.857698	0.268618	-0.0423302	0.750647	-0.36452	-0.877184	-1.17882	0.88714	0.457329	-0.921383	-0.300571	0.105655	-0.514919	0.0334543	0.169818	0.0803057	1.02467	-0.265671	-0.0796435	0.140267	-0.23909	0.254412	0.778796	0.935602	-4.54912	-1.16895	0.363798	0.117913	-0.851394	-0.722485	-0.793369
Cd302	+	0.201537	0.549156	0.756053	0.380145	0.805342	0.646095	0.820104	0.798374	0.815095	0.633009	0.576035	0.661402	0.24935	0.833117	1.15687	1.18112	1.12726	1.22262	-1.2701	0.0792287	-1.51796	0.396094	-0.158417	-1.7586	-0.604278	-1.77416	-1.88593	-1.81757	-1.62139	-1.14039	-1.36762	0.184053	0.966159	-0.243508	-0.912403	-0.333788	0.234462	1.06702	-0.651898	0.718331
Cd34	+	1.18593	0.663846	0.545016	0.832583	1.13184	1.09881	0.954973	0.92839	0.89101	0.931214	1.62744	1.3078	0.314219	0.42242	-1.63467	-2.42963	1.30951	0.66891	0.498646	-0.591314	-0.638128	-0.744204	-0.278141	-0.823488	-0.475706	-0.988619	-0.247799	-0.319232	-0.556509	-0.0699333	0.108136	0.955758	1.0549	-1.02646	-1.47644	-1.20706	-0.569807	-1.17062	-0.916034	-1.26755
Cd38	+	0.133942	0.262413	0.331342	1.33514	0.273036	0.649238	1.16332	1.20624	0.238011	0.653254	0.45078	0.835945	-0.0539155	0.03338	0.735737	1.22749	-0.237576	0.660267	0.321515	-0.508973	0.483021	-0.668163	-0.707155	-0.200972	-1.32885	-2.15431	-1.25986	-3.20312	-1.3794	0.141907	-1.62179	0.86325	0.86073	0.532711	0.890908	0.248735	0.271391	0.454511	-0.409984	-1.52414
Cd40	+	0.849893	0.824132	0.743567	0.743766	0.779556	0.800858	1.20418	1.3045	1.36684	1.29979	1.32788	1.3932	-0.206443	-0.0742892	0.311051	0.269154	-1.37322	-1.95155	0.172786	0.273518	0.112477	0.122894	0.22751	0.0371109	-0.341223	-0.0486198	0.206835	0.225302	0.233812	0.0901169	0.0639657	0.0364529	0.182237	-1.67045	-1.36658	-1.76346	-1.36712	-1.69391	-1.27772	-2.06881
Cd44	+	0.0763437	0.147242	-0.0270354	0.0212274	0.190993	0.168953	0.244031	0.188344	0.334251	0.299289	0.315833	0.219976	1.50212	1.54493	1.50842	1.53025	1.45121	1.44449	-0.193134	-0.227875	-0.218912	-0.394421	-0.428275	-0.806488	-0.70258	-0.628924	-1.81177	-1.87649	-1.68726	-1.90323	-1.8842	-0.744736	-0.627632	0.845957	0.86757	1.25447	1.2698	-0.537311	-0.450748	-0.274683
Cd47	+	-0.899728	-1.70076	-0.138258	0.110464	-0.274925	-0.513996	1.16011	0.746947	0.341388	-0.0620149	-1.32641	3.14667	1.33952	1.27949	0.604293	1.2455	0.55561	-0.179468	-0.0994605	-0.340338	-0.327829	0.374298	0.84048	-1.05222	-0.916237	-0.179813	-1.09041	0.0324373	-0.60127	0.054598	-1.46611	0.159178	-0.436474	-0.9309	-0.503882	1.24162	1.6014	0.395037	-1.72552	-0.463027
Cd55	+	0.557474	0.209764	0.519912	0.22654	0.238502	0.35272	0.475773	0.482917	0.302518	0.498491	0.353755	0.530029	1.12529	0.919245	0.748203	0.938365	1.45554	1.14044	-0.567166	-1.1185	-0.503971	-0.676893	-0.384641	-0.0195807	-0.00718416	-1.11381	-1.80774	-1.89277	-1.58191	-1.09462	-1.39937	0.66532	0.736126	1.14043	1.03329	0.921477	1.0334	-0.811058	-1.01319	-2.61311
Cd63	+	-1.28812	-1.32775	0.0330681	-0.12117	-0.729516	-0.656475	0.0335313	-0.341795	0.1959	0.649735	-0.915484	-0.948731	1.35906	0.741909	1.12024	1.03634	0.653308	0.710738	-0.673184	-0.974652	-0.678951	-1.15761	-1.09294	0.198734	0.308008	0.348972	-0.55303	-0.730487	-0.864736	-0.611848	-0.872554	-0.694412	-1.08153	2.39416	2.22012	1.87552	1.81241	0.221296	0.224445	0.177468
Cd80	+	0.0225331	0.436823	0.589485	0.554727	0.151523	0.643723	0.225766	0.440943	0.16445	0.272027	0.172208	0.168625	1.16485	1.2139	0.906213	0.977111	1.39046	1.1741	-0.541846	-2.12995	-0.350905	-0.706149	0.00208956	-1.40937	-1.22551	-0.717634	-1.77713	-1.98449	-0.489076	-1.30581	-2.17451	0.390199	0.217375	0.863921	0.81063	1.32492	1.27907	0.238158	0.0713186	-1.05478
Cd81	+	1.02654	0.875797	0.38061	0.568726	0.858945	0.717203	0.647564	0.757582	0.947553	0.933675	1.06354	1.03964	1.20922	0.973016	0.932074	1.10632	0.650022	1.00167	-0.346569	-0.576424	-0.501815	-0.937172	-0.91374	-0.794132	-0.344642	-0.382115	-1.7521	-1.64459	-0.665488	-1.32631	-1.37057	-0.439957	-0.836093	0.131235	0.333015	0.808525	0.942982	-1.97226	-1.80121	-1.30027
Cd82	+	0.674345	1.22498	0.674943	0.560252	0.934409	0.886693	1.17932	1.14663	1.30908	1.02792	1.1825	1.30935	0.682256	0.888784	0.952401	0.899194	0.486439	0.358503	-0.234873	-0.153413	-0.307341	-0.436172	-0.601785	-1.09896	-0.981383	-0.988751	0.00392628	-0.161554	-0.0465713	-0.527532	-0.914942	-0.401037	-0.184532	-0.743927	-0.798944	-2.1893	-0.264229	-1.46802	-1.00474	-2.87392
Cd9	+	0.558553	0.979471	0.872246	0.962793	0.863288	0.660947	0.737117	0.762085	0.440667	0.819288	0.728339	0.886742	-0.845912	-0.741868	-0.567908	-0.377451	-0.443851	-0.719057	0.675706	0.68805	0.668364	0.846019	1.17657	0.762187	0.633354	0.847554	-0.761324	-0.640543	-0.470226	0.476588	0.0353906	0.809754	0.543829	-1.36378	-1.63787	-1.07895	-1.34235	-2.40145	-1.80491	-2.23745
Cdc123	+	0.177214	0.1059	0.384399	0.0418885	0.359783	0.203507	0.588705	0.55586	0.460941	0.754908	0.323274	0.851196	-0.952922	-1.19433	-2.1088	-1.95269	-0.80481	-1.56403	0.79201	1.37746	0.891626	0.85904	1.21302	0.477916	-0.329736	0.421295	0.497506	0.346292	0.565085	0.443901	0.228946	0.65369	0.599196	-0.324251	-1.41064	-1.4437	-3.14255	0.534817	-0.209369	0.728439
Cdc16	+	1.14749	0.792051	-0.275413	0.0946004	0.464116	0.151644	0.562771	0.894902	0.28355	0.380735	0.986603	0.7901	-0.300146	0.305201	-0.458373	0.0787888	1.56488	1.67364	0.273293	0.62823	0.191525	0.358578	0.294763	-1.3201	-0.703204	-1.02422	-0.616023	-0.300762	-0.963073	0.0196433	0.105916	1.34769	1.55038	-1.04664	-2.77851	-1.62745	-2.57559	-0.107869	-0.564337	-0.279364
Cdc20	+	0.777122	0.854882	1.05404	0.833348	0.701383	0.728375	0.293766	0.392939	0.105915	-0.0469877	-0.0180374	0.115681	-1.47514	-1.15349	-1.58638	-2.16323	-0.0949925	-4.21012	0.264284	0.275495	0.0937341	0.0688513	0.147994	-0.737514	-0.407828	0.0929347	0.951089	0.919565	0.702911	1.03623	1.13229	0.292373	0.367208	-0.11822	-0.162659	-0.253418	-0.408598	0.158163	0.27139	0.204644
Cdc23	+	1.45575	1.25719	1.13224	1.91157	0.372871	0.725891	0.536361	0.311265	0.660792	0.963397	0.279658	0.956011	-0.536885	-0.797802	-1.71525	-0.811909	0.592677	-0.397293	0.59607	1.15315	-0.631528	0.00477873	-0.496284	-1.35063	-1.25603	-1.17023	-0.640888	-0.0871805	-0.679814	0.303569	-0.0854726	1.2025	1.7976	-1.13148	-2.21263	-0.946565	-1.23809	-0.306122	-0.321814	0.600573
Cdc26	+	1.34464	0.979002	1.02371	1.07954	0.657083	0.665281	1.14675	0.862417	0.989456	1.27574	1.63263	0.903924	-1.97457	0.0586638	-2.79891	0.440692	-0.213306	-0.824854	1.04229	1.00965	-0.572455	0.410541	-0.513642	-0.367464	-0.391801	-0.83404	-0.315051	-0.353053	-0.405893	-0.0210439	-0.00975524	-0.741904	0.272406	-1.91294	-0.340611	-1.53108	-1.11694	-0.112938	-0.227633	-0.214522
Cdc27	+	0.292512	0.885632	0.687063	1.78553	1.21087	0.352042	0.653927	0.0595175	-0.48719	0.588695	-0.438775	-1.05577	-1.29523	-1.19294	-2.9329	-2.94935	-0.109743	0.361491	-0.107918	-0.944295	0.0816182	0.101121	-0.0947215	-0.581602	-0.295373	-0.313418	0.743242	-0.494666	0.015326	-0.00128177	-0.77089	0.418513	0.00612479	1.09149	1.88242	0.805727	0.72949	0.968354	-0.0275964	0.372973
Cdc34	+	0.281668	-0.0752028	0.84176	0.598525	0.173589	0.263578	0.212508	0.0677773	-0.49068	-0.513066	0.0899444	-0.08455	-1.48281	-3.30731	-1.35594	-1.15334	-1.02209	-0.944436	0.749897	0.471965	0.591832	0.604734	0.519999	0.598838	0.481211	0.56222	0.825164	0.96181	0.882389	1.062	1.04353	0.724319	0.59009	-1.31267	-2.25364	-1.57013	0.393996	0.523404	0.863859	0.585246
Cdc37	+	-0.840789	-0.792578	-0.346733	-0.463101	-0.63083	-0.739136	-0.361562	-0.378899	-0.586928	-0.647658	-0.668895	-0.62465	-1.28813	-1.30918	-1.31716	-1.36415	-0.891178	-0.918902	1.16028	1.2017	1.21658	1.19702	1.20024	0.87804	0.847807	0.923462	1.11129	0.928729	1.00676	1.10139	1.15816	0.978389	1.0014	-1.03965	-1.34396	-1.34936	-1.0223	0.934897	1.0659	1.01367
Cdc40	+	0.845197	1.57639	1.94497	2.00779	-0.0667733	1.6565	0.734121	0.437689	-1.05345	-0.255267	0.120733	0.515471	-0.552909	0.0935254	-0.657276	-0.37903	1.12027	0.216243	0.123659	0.109808	-0.0694988	-0.15756	-0.222056	-0.545954	-0.587048	-0.0325402	-0.552862	0.57159	0.642018	0.58698	-0.274862	0.440508	-0.252588	-0.953251	-1.49235	-2.70086	-1.92032	-0.285917	-1.76569	1.03459
Cdc42	+	-1.36728	-1.43014	-1.3172	-1.75108	-1.39492	-1.50525	-0.808173	-0.427388	-0.349549	-0.090914	-1.24336	-0.630337	-0.304461	-0.889721	-0.424837	-0.803156	-1.18789	-0.954671	1.21464	1.3545	0.912551	0.851155	0.203235	1.26125	0.163545	0.98326	1.156	0.959342	0.201129	0.367328	0.920465	-0.664875	-0.132031	0.992976	1.15767	1.20416	0.31097	1.2104	1.23518	1.01748
Cdc42bpa	+	-0.717488	-1.62303	-1.23099	-0.0082199	-1.18332	-1.48634	-0.97483	-0.479046	-1.69004	-1.32459	-0.984286	-0.725316	0.794253	0.401288	0.0978295	0.224018	0.183832	-0.132741	0.296152	0.258516	0.192944	0.529864	0.61926	0.293804	1.02235	0.691477	-1.10627	-1.34486	-1.11294	-0.0723843	-0.405196	0.591588	0.291475	1.61115	1.9788	1.04386	1.13122	1.37724	1.43251	1.53846
Cdc42bpb	+	-1.53941	-1.19614	-0.670679	-0.842075	-1.50245	-1.64236	-0.959412	-1.17269	-1.17069	-1.10558	-1.19278	-1.24621	-0.267059	-0.258713	-0.494573	-0.188489	-0.425723	-0.231206	0.859674	1.36884	1.31973	1.11627	1.5853	1.64947	1.65641	1.73598	-0.0595322	-0.0210811	-0.00369958	0.603338	0.29111	0.991185	1.06587	-0.0480697	-0.375614	0.71275	0.614733	0.255701	0.408446	0.379415
Cdc42bpg	+	0.271093	0.122447	0.419759	0.434844	-1.65954	0.527821	-0.187072	0.259082	-0.123829	0.662505	-1.0073	-1.83545	-2.02483	-0.968772	-1.75977	0.699053	-0.542748	-0.747905	1.03654	0.631376	0.863335	0.936627	0.903309	1.03122	1.15319	1.28085	0.867297	1.05343	0.982307	1.08363	0.400019	0.645836	0.639346	-0.215536	-1.50645	-0.783196	0.324376	-1.29226	-1.5562	-1.01842
Cdc42ep1	+	-0.478799	0.136958	-0.903296	-0.0221878	-0.768167	0.195775	-1.17995	-1.47451	-0.00104652	-1.72155	-1.59877	-1.3024	0.493313	0.469993	-0.232275	0.306399	-1.35627	-0.923726	-1.1339	-0.887462	0.8824	-1.45799	0.674672	0.920026	0.0235525	-0.707284	0.301984	0.495437	0.359073	0.715907	0.757568	0.707058	0.959358	1.40199	-0.90815	1.15595	1.36969	1.52436	1.62681	1.57944
Cdc42ep4	+	-1.52817	-1.00693	-1.68195	-0.606674	0.626249	-0.883812	0.326725	-0.335418	-1.37677	0.680979	-0.262544	-0.940091	-1.00955	1.02612	0.16855	-0.738473	-0.255693	1.20776	0.818099	2.31155	-0.210463	0.000604698	0.985032	-2.0769	-1.02966	-1.62679	0.600034	1.20283	0.163896	0.352628	-0.169608	1.27706	1.79349	0.199027	-0.0615426	0.474264	-0.327498	0.382233	0.807198	0.724194
Cdc42se1	+	-1.10585	0.0847644	0.192903	-0.344212	-0.92474	-0.818826	0.214376	-0.351335	-1.56064	-0.531474	-0.729963	-1.13945	1.66977	1.02232	1.34427	0.981319	1.16782	1.30346	-1.25252	-1.13582	-0.709287	-0.42961	-0.176378	-0.379674	0.269377	-0.0415016	-0.722927	0.10388	-0.569099	-0.669203	-0.194161	-1.56431	-1.53702	1.49987	1.75949	0.255531	1.23031	1.43264	1.13592	1.21996
Cdc42se2	+	-0.529325	0.0222312	-0.262342	-0.338999	0.232463	0.415852	0.469898	0.432961	1.15853	1.04202	0.639232	0.996137	1.33693	1.44982	1.62819	1.50379	0.665054	0.695484	-0.430216	-0.336096	-0.949313	-0.626278	-0.824111	-0.286552	-0.741316	-0.0348777	-0.180075	0.0285903	0.173136	-0.407728	-0.00975287	-2.38001	-2.64928	0.149126	0.246444	-2.44183	-1.32391	0.40085	0.556883	0.508385
Cdc5l	+	1.08656	1.37173	1.90065	1.64031	1.34076	1.62961	1.31919	0.865319	-0.128738	0.801413	0.328542	0.488811	0.539424	0.372444	0.815543	0.96367	0.714746	0.297306	-0.672136	-0.553417	-0.480925	-0.916382	-0.544124	-1.22767	-1.59786	-1.06632	0.160062	-0.269426	-0.420666	0.399534	-0.237592	-0.227119	-0.379291	-1.65849	-0.481538	-1.15786	-0.740682	-1.30377	-1.30147	-1.67013
Cdc73	+	1.46548	1.28911	1.53005	0.566785	1.27972	0.857169	0.332719	0.209083	0.553251	0.0141134	0.2833	0.0920935	-0.00191658	0.197568	-0.805198	-1.14725	0.773168	0.484879	0.139945	-0.0446382	0.15807	-0.289917	-0.606103	1.20623	1.34334	0.772278	-0.743512	-1.3668	-1.24486	0.281042	0.216395	0.690121	0.174577	-1.34607	-0.475605	-0.236446	0.23526	-2.05457	-2.43759	-2.34528
Cdca2	+	1.14492	0.639733	1.68147	1.58995	0.69354	0.372838	0.74016	0.309355	-1.35167	-0.242431	-0.365545	0.0631616	0.153786	-0.892429	-1.02575	-1.05696	0.999188	1.44667	-1.08492	-0.940613	-0.355905	-1.58274	-1.04174	0.921053	1.28449	1.05006	-1.50523	-1.53975	-1.58993	-0.932162	-0.415629	-0.879925	-0.0222009	1.42615	0.219127	0.429829	1.27236	0.516055	0.0707039	-0.199077
Cdca5	+	1.79917	1.92879	1.49131	1.4982	1.41344	1.27213	1.14398	0.741965	1.01727	0.414519	1.06679	1.03397	-0.141317	-1.13715	-1.18496	-1.83977	-1.00788	0.34283	-0.186591	0.014132	-0.292816	-0.37773	-0.646758	-0.998059	-0.516461	-0.971117	-0.0322094	-0.0173131	-0.0563558	0.19665	0.620103	0.270754	0.189392	-1.36343	-1.07008	-1.32884	-0.43861	-1.26704	-1.11287	-0.468035
Cdca7	+	1.52075	1.42085	1.10038	1.46794	1.04095	1.09062	0.653479	0.512979	0.461825	0.997578	0.251199	0.317186	0.189687	-1.36235	-1.12802	-1.31387	-0.970997	-0.417577	-1.43	0.570333	-1.01691	-0.650331	0.226998	1.26293	0.270503	-0.510144	-0.55875	-0.0222845	-1.88617	-1.21865	-0.0421976	-1.02715	1.23665	-1.15336	0.618705	0.792047	1.25371	-0.840373	-0.101219	-1.60695
Cdca7l	+	1.35229	1.73384	1.5232	1.47166	1.53705	1.38436	0.749964	1.06109	1.00344	1.07497	1.17071	1.33884	-0.764802	-0.278969	-1.70771	-0.881441	-0.573501	-1.55672	-0.685178	0.524779	-1.28268	-0.513882	-0.405911	-0.129699	-0.367661	0.0156838	-0.968847	-0.46181	-0.327309	-0.580466	0.472863	-0.474217	0.781389	-0.767336	-0.413922	0.220181	-0.713794	-1.18678	-0.954321	-1.41935
Cdca8	+	0.78748	0.243894	1.33912	1.35072	0.519934	0.272909	-0.172428	0.0243002	-0.466631	0.0592075	0.160991	-0.0770744	-1.05147	-2.05432	-1.58838	-0.0583879	-0.470251	-0.428212	-0.787929	-0.202038	-0.300897	0.0314322	-0.380804	2.34921	1.17933	-0.419424	-1.62176	-1.26923	-0.622503	-0.672914	-0.907596	-1.02695	-0.37031	0.730209	0.571277	0.274357	1.00298	0.302362	0.959917	2.78989
Cdcp1	+	1.03919	-0.83461	0.830844	1.14097	1.03731	-0.723344	1.05831	1.07859	-1.44961	-0.916938	1.02825	0.42077	-1.00758	-0.61096	-0.764548	-1.21371	-0.980505	-1.42688	0.602107	0.752241	1.11093	0.959464	0.967538	1.46673	1.17303	1.33174	0.938081	-1.39044	-0.856954	-0.9628	0.898004	-0.214426	-0.613575	-1.36634	-1.03636	0.0159903	0.898302	-0.586276	-0.838354	-0.954188
Cdh1	+	0.219904	0.202778	0.112296	0.0444963	0.309352	0.181213	-0.417087	0.0192482	-0.265664	-0.173438	-0.230683	-0.440434	-1.37093	-1.54187	-1.00365	-1.18551	-1.30867	-1.23926	1.00123	1.04368	1.26703	1.22337	1.26548	1.58667	1.55376	1.57051	0.793733	0.78745	0.77004	0.767426	0.753062	0.866057	0.824142	-1.43399	-0.815953	-1.44912	-0.983516	-0.796954	-1.51816	-0.988037
Cdh11	+	-0.778289	-1.51572	0.84061	0.101113	-1.3669	-1.96932	0.0501742	0.112207	-0.0482671	0.0575624	0.0636534	0.0130872	1.03331	0.952962	1.07977	1.01286	0.803118	0.863054	-0.19508	0.115545	-0.283173	-0.147627	-2.51359	-2.3611	0.156391	-2.66791	-0.19591	0.280524	0.36645	-0.124277	0.776966	0.152025	0.131386	0.887354	0.890066	0.670009	0.69659	0.758243	0.564218	0.737922
Cdh13	+	0.948335	0.568514	0.900179	0.376609	0.659905	1.2315	1.08715	0.994587	0.815797	1.02315	0.994093	1.16556	0.652998	0.658933	0.887237	1.01449	0.462756	0.804852	0.356629	-0.287106	-0.959439	-0.408426	-0.372199	-0.513027	-0.892215	-0.347478	-0.952671	-2.13172	0.238027	-1.09411	-1.39122	-0.599157	-0.450928	-2.74747	-1.25962	0.538455	0.67942	-0.752681	-1.66663	-0.23309
Cdh2	+	-0.583093	-0.761486	-1.30892	-0.707001	-0.781552	-0.677884	-0.27997	-0.151231	-0.300612	-0.0584138	0.113772	0.0968876	1.99765	1.99349	1.97117	1.87819	1.2699	1.54408	-0.587651	-0.746697	-0.60919	-0.498611	-0.930849	0.291888	-0.684624	-0.171889	-1.58805	-0.940794	-0.934681	-0.436737	-0.211677	-1.42241	-1.16573	0.414346	0.923482	0.812784	0.897096	0.911368	0.714616	0.709052
Cdh3	+	1.15816	1.13006	1.29535	1.26993	1.14922	1.12552	1.35893	1.37192	1.28941	1.19498	1.22793	1.12589	-0.615099	-0.663408	-0.266649	-0.193375	-1.71968	-1.60549	-0.283901	-0.330583	-0.282357	-0.44449	-0.387651	-1.10173	-0.920035	-0.973117	0.313873	0.24668	0.304481	0.00525374	-0.0994051	0.135456	0.311035	-2.11586	-0.459097	-1.701	-1.47946	0.484121	-0.234737	-0.621051
Cdipt	+	1.73356	0.1673	0.888708	0.996957	1.47908	1.31763	1.30382	-0.27547	0.363367	1.39136	1.16978	0.788983	0.72767	0.899076	1.2242	-0.00883537	-0.223552	0.0160253	-0.0773568	-1.35915	0.538624	0.468085	-0.168321	-1.56934	-0.258414	0.0348467	-2.00672	-1.50323	-1.53246	-0.773421	-0.857651	-0.677011	0.199028	-0.648397	0.543712	-0.0799499	-0.386957	-0.99521	-1.09014	-1.76023
Cdk1	+	0.72021	0.296361	-0.0105912	0.0648784	0.29695	0.368296	-0.129611	-0.0459383	0.100473	0.0531699	0.00182076	0.11181	-1.61527	-1.82387	-2.81245	-2.91692	-0.972995	-1.09376	0.986554	0.882901	0.21053	0.0149533	0.0667246	0.0110391	0.0163945	-0.125062	1.29419	1.29774	1.24781	1.2707	1.31081	0.505719	0.519525	0.0916125	0.184044	-0.98478	-1.04148	0.606665	0.63241	0.408436
Cdk11b	+	0.569932	0.830359	1.41286	1.01516	0.556027	0.438792	0.197457	0.0209692	0.0822426	-0.15379	-0.211297	-0.240568	-0.482471	-1.14314	-0.519926	-0.548304	-0.1433	0.323603	0.531216	0.308771	0.112524	0.153228	0.0805807	0.529712	0.479471	0.73796	0.35852	0.659775	0.0806308	1.22135	1.094	1.56773	1.08683	-2.87535	-1.99539	-2.70082	-1.71281	-0.947829	-0.398014	-0.376685
Cdk12	+	1.85987	1.142	1.71947	1.60241	1.08178	1.25568	0.959352	0.40486	0.290525	0.376447	0.412586	0.448118	0.0332313	0.401076	-0.0195349	-0.918833	-0.045862	0.0567652	-0.277694	-0.703971	-0.278526	0.0846241	-0.458616	-0.271131	-0.084669	0.648393	-0.277153	-0.464823	0.55616	-0.170227	-0.229319	0.490226	0.84886	-3.31293	-0.805766	-1.28139	-1.41893	-1.65183	-0.648867	-1.35237
Cdk13	+	0.559637	0.494221	-0.217148	-1.02711	-0.134558	0.0311536	-0.648817	0.211792	-0.59526	-0.109362	-0.525697	0.0282037	1.57458	1.50424	0.75674	0.819028	1.75756	1.35395	-0.917147	-0.8837	-1.62756	-1.06909	-1.38826	0.152099	0.322927	0.416777	-2.11568	-1.02904	-1.69996	-0.861394	-0.636418	-0.32727	0.579377	1.19281	1.10129	1.37722	1.72462	-0.247911	0.243739	-0.140591
Cdk16	+	-1.48202	-1.07932	-0.225707	-0.650601	0.364921	-0.676598	-1.39483	-1.8542	-0.492301	-0.533444	-1.08599	-0.00870856	0.250396	-1.96095	-1.95133	-1.56805	0.403658	-0.870024	0.664188	0.885116	0.281573	0.562486	0.493373	0.828472	0.707369	0.75512	1.2838	0.82086	1.15834	0.741274	1.01006	0.758759	1.01558	-0.882582	0.314167	-0.281885	-0.143631	1.24174	1.41426	1.18667
Cdk17	+	1.15369	0.658159	0.00912586	0.481015	0.231946	0.563109	0.840175	0.868631	0.428947	-0.27882	-0.904554	0.423107	-1.00249	0.105322	-0.543853	-0.439146	-0.25831	-1.26691	-1.24676	-0.263389	-0.694812	0.170005	-0.332183	-0.0221756	-0.288427	0.200406	-0.723429	-1.67625	-1.82149	-0.902449	-1.25006	-1.55468	-0.949418	1.21918	1.50281	1.012	1.03555	1.90665	1.92665	1.68312
Cdk18	+	0.704196	0.87347	1.10173	0.432158	0.611955	0.564313	0.618402	0.714245	0.428241	0.574074	0.283863	0.379662	-1.46967	-1.76863	-2.36738	-2.27376	-1.16952	-2.29725	0.347854	0.684013	0.504813	-0.139367	0.272013	0.518732	0.859256	0.614122	0.691437	0.616739	0.924004	0.658138	0.547947	0.531787	0.751024	-1.43438	-0.971139	-0.973995	-1.2768	0.340782	-0.0101653	0.00308498
Cdk2	+	-0.361978	-0.105384	-0.497121	0.106286	-0.492086	-0.282722	0.15714	-0.0781638	-0.69293	-1.04575	-0.248656	-0.0493299	-1.93622	-1.83922	-2.70479	-2.38458	-0.994365	-1.83725	0.0627126	0.18996	0.467029	0.376426	0.522677	0.86228	0.539066	0.423366	0.869436	1.0783	1.04283	0.921156	0.76325	0.865427	0.724977	0.711243	0.856896	0.687281	0.974388	0.866045	0.769884	0.712496
Cdk4	+	-0.662279	-0.405643	0.604972	0.356859	-0.368701	-0.190026	0.032956	0.200521	-0.423142	-0.644445	-0.362799	-0.210181	-1.7144	-2.39179	-2.35587	-2.30252	-1.26605	-1.57721	0.688482	0.802564	0.746727	1.00347	1.24001	0.720263	0.16296	0.386645	0.168006	0.455158	0.611083	0.477005	0.64476	1.1447	1.01144	0.393806	-0.301466	0.127595	-0.422658	1.13002	1.27248	1.21672
Cdk5	+	-0.226936	0.0294621	-0.0761113	0.00410666	-0.278197	-0.211751	0.282883	-0.10944	-0.00852287	-0.0952918	0.133035	-0.0559031	-1.4863	-1.61179	-1.95474	-2.29562	-1.0623	-1.92692	0.876576	0.949707	0.458517	0.603626	0.699685	1.79478	1.19141	0.946807	-0.369448	-0.0243866	-1.53172	0.0545284	0.182617	0.943096	0.893665	-0.229735	0.573963	-1.05039	-0.184309	1.43087	1.0901	1.65039
Cdk5rap1	+	1.24594	1.33653	1.07826	1.60166	1.37221	1.53245	0.676294	0.895721	0.237706	0.76287	0.917788	0.861819	-0.614373	-0.505583	-0.0515888	-0.677583	-0.527867	-1.10259	-0.435951	-0.13652	-0.289202	-0.368198	-0.474611	-0.123236	-0.556772	-0.548021	0.347095	0.0754869	0.486815	0.114361	0.0113267	0.694458	0.71568	-2.48203	-1.81177	0.845207	-1.24337	-0.90727	-0.453574	-2.49957
Cdk5rap2	+	-2.01072	0.0717214	-1.2364	0.652759	0.0709049	-0.261266	-0.0121615	-0.176581	-0.788549	0.592725	-0.561515	-0.277823	1.29114	-0.0271663	-0.981497	-0.310217	-0.0811139	-0.235526	1.40408	1.59396	0.853536	-0.0260708	0.02128	0.15996	0.927013	0.441535	1.00947	0.867516	0.982976	0.912599	0.885012	0.807447	1.63322	-1.6922	-2.03035	-0.547196	-2.59168	-0.149562	-0.69127	-0.490001
Cdk5rap3	+	-0.36479	-0.205314	-0.103515	-0.361873	-0.656277	-0.102401	-0.0620081	0.156631	0.13558	-0.652799	-0.0245737	-0.204394	1.52178	1.62272	2.12738	1.80534	2.1534	1.12126	-0.821237	-0.563896	-0.170689	-0.590854	-0.725829	-0.00750278	-0.00858945	0.172912	-2.0598	-1.62334	-1.5514	-1.22592	-1.18232	0.123422	0.304729	0.550539	0.58013	1.13803	1.39233	-0.67926	-0.68349	-0.274122
Cdk6	+	-0.90353	-1.2952	-1.40587	-1.08628	-0.446625	-0.191076	-0.0178881	-0.0156949	-0.750433	-0.508283	-0.353729	0.132493	-1.71874	-1.22055	-2.04327	-1.26253	-1.32707	-0.889993	0.405067	0.458491	0.544859	0.38362	-0.265654	0.790344	0.45239	-0.271498	0.57588	0.670542	0.796797	0.466561	-0.0183195	1.16288	1.27627	1.24358	2.3479	-0.438222	0.867018	1.38122	1.19671	1.27786
Cdk7	+	0.470214	0.949437	-0.219679	0.396463	-0.180895	0.344302	-0.0416146	-0.354657	-0.155087	0.191864	-0.348049	0.0598549	-1.83763	-1.1583	-2.3714	-2.38962	-2.33226	-1.89217	0.894745	0.557936	0.714334	0.784815	0.719802	1.20803	1.33754	1.45014	-0.367501	-0.0366861	-0.315881	0.7348	0.445583	0.898705	1.13073	0.463047	0.175805	0.436015	0.336441	-0.438052	-0.440935	0.179823
Cdk8	+	0.616903	0.436957	0.344205	0.296752	0.386655	0.551284	-0.365437	-0.501979	-0.237173	-0.873199	-0.492693	-0.793627	-0.481767	-1.46009	-1.47978	-1.34214	-2.07595	-2.07069	0.290524	0.189199	0.601396	0.37753	0.942911	1.53429	1.64049	1.23638	-0.451516	-0.012051	-0.00953618	0.18867	0.285293	1.45501	1.71835	-1.61758	-0.579673	-0.956817	-0.339499	0.948905	1.34421	0.755263
Cdk9	+	0.744618	0.650154	1.1374	0.694516	1.07766	0.90844	0.959862	0.895576	0.550071	0.89006	0.641868	0.76697	-1.14935	-0.950066	-0.655953	-0.780519	-0.753975	-0.695278	1.04517	0.958963	0.863946	1.13184	0.623371	-0.394482	-0.225486	0.0536275	-0.0378714	-0.160072	0.0167895	0.799973	0.944477	0.385785	0.256412	-2.4478	-2.28515	-1.4723	-1.389	-1.27782	-0.967249	-1.35518
Cdkal1	+	0.791969	0.936146	1.06888	1.52068	1.27464	1.45471	0.102063	0.641565	0.659829	0.633079	0.705346	0.612433	0.982075	1.05268	0.985254	0.556669	0.886215	0.807653	-0.716168	-0.89562	-1.78412	-1.14694	-1.3419	-0.918621	-1.81339	-2.18219	0.243614	-0.0206264	-0.315942	-0.344498	-0.475408	0.252704	-0.706349	-0.661104	0.428035	-0.0734768	0.583074	-1.11903	-1.46838	-1.19554
Cdkn1a	+	-0.249065	-0.0429633	-0.557181	-0.130988	-0.113496	-0.269218	0.545286	0.470829	-0.0149566	-0.0718302	0.242148	0.512895	-1.60236	-1.35998	-1.95912	-2.12573	-1.43077	-1.58688	1.35857	1.45802	1.21954	1.3263	1.20677	1.21365	1.2932	1.38955	0.559663	0.510648	0.67739	0.404631	0.42467	0.52837	0.753472	-1.43374	-1.02922	-0.803642	-0.602396	-0.448148	-0.178591	-0.085322
Cdkn2a	+	0.928257	0.904601	0.702819	0.492534	0.260614	1.08251	0.945848	1.54336	1.25925	1.71486	0.942171	1.86448	-0.911047	-0.28427	-0.262613	-0.277407	-2.34074	-1.17113	-0.43179	0.480481	0.286163	0.683707	-0.0226064	0.182838	-0.0490864	0.518083	-0.999922	-1.17684	-1.41402	-1.72167	-0.893645	0.863396	0.670971	-1.39392	-0.356476	0.106878	-1.31257	-0.437544	-0.185993	-0.79053
Cdkn2aip	+	-0.232195	-0.00169005	0.085791	0.222102	-0.519009	-0.528457	-0.737151	-0.914074	-0.284092	-0.270723	-0.672696	-0.622781	1.45277	1.52715	0.770288	0.503266	1.79824	2.1601	-0.730286	-0.499962	-0.035321	-0.140583	0.0612242	0.932924	0.79628	1.29338	-1.47431	-1.69415	-1.61591	-0.807104	-0.53015	-1.0684	-0.264162	0.956369	1.10577	1.30454	1.54729	-0.942576	-0.906897	-1.02482
Cdo1	+	0.982208	-1.30486	-1.22999	0.920779	-0.0792703	-0.219494	-0.283439	-1.07423	-0.347808	-1.86876	0.12061	-0.425651	-0.682327	-0.0808087	-0.530363	-1.17305	0.130253	1.30177	0.48895	1.27356	0.284852	-0.0484091	-1.37726	-0.943632	-0.0477845	-1.19177	-1.0728	0.60084	-0.811314	-0.335805	-0.220258	0.712302	-0.0454073	0.91318	0.717052	-0.000751167	0.374348	2.00146	2.49549	2.07759
Cdr2l	+	-0.68993	-2.53434	-1.95631	-1.04019	-1.57292	1.41675	1.05359	0.646246	-0.0587069	0.886101	0.355062	0.333783	-0.198391	1.91567	0.36981	0.496804	-0.0118739	0.423976	0.567648	-0.25736	-0.290641	-0.160074	-0.490583	-1.71551	0.419094	-1.32777	-0.780637	0.263848	-0.697424	-0.202559	-0.471922	1.33532	1.74813	1.61902	-0.369453	-0.435408	0.834132	-0.208236	0.375801	0.409456
Cds2	+	-0.389788	0.419458	-0.0306631	-0.0785218	-0.800431	-0.0954554	0.213012	0.396736	0.631428	0.927024	0.220733	0.337665	1.22869	0.831483	1.47151	1.61628	1.17076	0.959508	-0.492599	-0.861645	-0.510083	-0.847304	-1.25321	0.122762	0.548454	-0.582313	-2.52884	-1.0601	-2.11112	-1.07291	-1.99499	0.23902	0.51011	0.228568	-0.604604	0.902255	0.0777067	-0.54438	1.54121	1.26458
Cdt1	+	-0.563336	-2.9084	-1.17427	-0.20617	-0.248246	-0.714914	-0.66722	-0.867034	-0.725956	-0.269262	-0.184446	-0.218418	0.403058	0.687686	-1.6084	0.683819	-2.81084	0.00757593	1.21573	-0.0948896	0.377698	1.15022	-0.328597	1.25278	1.01692	0.971131	0.644694	0.227829	0.432922	1.20669	0.790991	0.842596	0.413892	-0.759145	-0.442472	0.872523	0.867971	-0.813186	1.21866	0.319791
Cdv3	+	-0.835199	-0.765155	-1.03381	-1.03071	-1.01629	-1.03903	-0.999512	-0.950593	-0.665771	-0.633129	-0.922305	-0.644475	-1.30837	-1.18327	-1.70097	-1.99657	-0.814215	-0.929243	1.00402	0.96654	1.02309	0.946985	0.893578	1.2715	1.28959	1.32783	0.751948	0.664862	0.546613	0.728363	0.870887	0.822899	0.803824	0.507866	0.641169	0.0798549	0.0393497	1.15035	1.14715	0.990355
Cdyl	+	1.13709	1.46891	2.04934	1.54554	1.64838	1.60712	0.965658	0.953585	1.04831	0.793792	0.761964	0.736335	-0.830557	-0.385555	-1.55732	-1.13715	-1.56307	-1.0083	-0.336798	0.1541	-0.457407	-1.23498	-0.491578	-0.703084	-0.12304	-0.0021384	0.0433242	0.0993514	0.536154	0.473273	0.218575	-0.00823162	0.0270268	-1.8009	-0.179405	-1.31852	-0.328373	-0.997805	-0.979801	-0.823811
Cdyl2	+	0.550853	0.623964	0.751188	0.769554	1.17727	1.2354	-0.481358	0.981024	1.29	0.769669	0.503219	0.915249	0.674015	-0.449408	-1.47967	-0.450964	-1.14389	-0.682021	-0.119868	-0.156104	-1.05218	-0.308277	-3.15674	-0.731268	-1.15959	-0.659505	-0.115787	-0.0517794	-0.494954	1.37908	-1.73718	-0.00272511	1.6585	0.643784	-0.489452	-0.0298667	1.37977	-0.419664	-0.550604	0.620318
Ceacam1	+	0.449276	0.599595	0.231868	0.27158	0.394145	0.44715	0.620981	0.295455	0.46406	0.350156	0.414674	0.735643	-1.99378	-2.018	-1.20544	-0.788652	-1.05844	-0.371668	1.1095	1.15222	1.36192	1.17771	1.03014	0.767698	0.772933	0.562015	0.492921	0.584175	0.0168621	0.335036	0.0268538	1.29924	0.959741	-1.84838	-1.04466	-1.38253	-1.59893	-1.2326	-1.35083	-1.02964
Cebpg	+	0.53012	0.739238	1.45403	1.67203	0.386016	0.585324	-0.0556912	0.402582	-2.05272	-0.279786	-1.17626	-0.0943762	0.956847	-0.121717	0.0915771	-0.50023	1.04417	0.67729	-1.33756	0.213945	-0.38787	0.170507	-1.26021	0.325011	-2.02555	0.306457	0.130939	0.855275	0.652094	-0.446839	-0.974415	1.3514	-2.22819	-0.285023	0.104108	0.950351	0.61397	-1.14387	-1.41672	1.57373
Cebpz	+	1.51579	1.62619	1.50962	1.47139	1.46338	1.43708	1.20833	1.20249	1.03021	1.07031	1.07672	1.12654	-0.774043	-0.669052	-0.821727	-0.527333	-0.626033	-0.684143	0.0801052	0.0320078	-0.231733	-0.0517582	-0.0925488	-0.190355	-0.517367	-0.509682	-0.255372	-0.359972	-0.507123	0.113346	0.0397602	0.206872	0.31937	-1.2667	-1.75235	-1.11544	-1.19734	-1.43751	-1.54701	-1.39493
Celf1	+	1.38817	1.3168	1.09844	1.38733	1.46714	1.22902	1.32269	1.24323	1.13716	1.29539	1.58328	1.3797	-0.905857	-0.649719	-0.186404	0.048846	-0.680242	-0.435031	-0.40137	-0.296584	-1.15696	-0.959857	-0.913646	-1.42205	-1.54576	-1.22507	-0.157658	-0.118638	0.270074	-0.323449	-0.301749	0.299812	0.258071	-1.0756	-0.972574	-1.06403	-1.69756	-0.152778	-0.232005	0.149453
Celf2	+	-0.114186	0.289848	0.627282	0.978543	-0.269966	-1.1084	-1.0662	-0.506189	-1.25827	-0.0169255	-0.71314	-1.09694	-0.746106	-1.58486	0.259008	0.0856643	0.322591	0.283308	-1.83237	-1.70678	-0.840981	-0.678003	0.383157	0.339924	0.97663	0.707112	-0.164582	-0.906575	-0.117113	-0.712819	-0.760644	0.418054	0.220766	2.08269	1.66988	0.656787	0.915877	1.54191	1.39639	2.04563
Celsr1	+	0.00765983	0.334718	0.0212506	0.227981	0.31603	0.129921	0.246872	0.189081	0.0594454	0.359118	-0.182282	-0.0401795	-1.59911	-1.25283	-0.313748	-0.751985	-0.740178	-0.768106	1.3325	-0.521166	1.25353	1.24496	-1.14934	-1.76991	-0.883803	1.24625	1.7293	1.83229	1.82471	1.14776	0.603233	0.861037	1.33127	-0.813894	-1.58926	-1.11541	-0.549609	-0.375494	-0.782834	-1.09977
Cemip2	+	-0.972444	-0.484815	-0.793657	-1.94226	-0.814417	-0.397231	-0.32098	0.287637	-1.18341	-0.00145923	-0.965686	-0.327891	0.783475	1.69853	1.02768	1.2528	0.524131	1.61447	-0.593215	-0.451313	-0.401305	-1.5652	-0.158944	-0.046433	0.859671	0.517781	-0.547114	-0.96932	-1.87771	-1.08234	-1.13318	0.142505	0.509711	1.65682	1.10454	1.21831	1.14268	0.783132	1.14939	0.757069
Cenpa	+	1.78394	1.46092	1.65627	1.69849	0.899424	1.65458	0.635424	0.927783	0.407943	0.306386	0.332602	0.729196	-0.1259	0.0305615	-0.549571	-0.50408	0.778334	1.04097	-1.00577	-0.821994	-1.00451	-0.95436	-0.788797	-1.00904	-1.05611	-1.11163	-1.07566	-1.85424	-1.67245	-0.0371905	-0.227002	0.315108	0.593232	0.508584	0.422321	0.550357	0.390677	-1.04199	-1.15208	-1.13073
Cenpc	+	0.0485628	1.26904	0.974923	0.0332362	1.05907	0.485702	-0.104748	0.384053	0.088323	0.497025	0.294734	0.750678	-0.171578	0.0368313	-2.34936	-1.43381	-2.37015	-0.347551	1.12737	0.375893	-0.903295	0.996417	-0.644179	-0.0204877	1.39213	0.116999	-2.12873	0.912165	1.85735	0.960127	0.581184	0.260652	0.397249	-0.50446	-0.730816	-1.84017	-0.358437	-0.643507	-0.124421	-0.224016
Cenpe	+	0.0998877	0.425635	0.461938	0.757687	-0.528244	0.254589	-0.09751	-0.248054	-0.543091	0.0675868	0.0833499	0.109392	0.0493032	-0.915039	-2.09775	-1.60274	-2.09951	-2.07807	0.663594	0.945074	0.448746	-0.295159	-0.708368	-1.79757	-0.873506	0.0959772	1.41121	1.07191	1.1571	1.20826	1.05926	0.612285	0.215878	-0.234304	2.28763	-0.858559	-0.151875	0.293023	0.454741	0.89529
Cenpf	+	1.23973	1.03655	1.50641	1.15323	1.02106	1.03463	0.787021	0.493173	0.334936	0.301957	-0.13092	0.18022	0.628306	-0.0294377	-2.31437	-2.09112	0.109214	0.644375	-0.595657	-1.23444	-1.14647	-0.397736	-0.1763	-1.44609	-0.817437	-1.04037	0.421838	0.932131	1.2401	0.477336	0.593148	0.6323	0.0602462	-2.03084	-1.33439	-0.107302	-0.886264	0.327806	1.09063	-0.467196
Cenpq	+	1.67798	1.39711	1.27723	1.10819	1.49437	1.3912	0.85257	0.309964	0.867747	0.837648	0.992849	0.365606	-0.176155	-0.379399	-0.742208	-0.374873	0.416842	0.0531513	0.268199	-0.170708	0.025385	-0.00539768	0.151458	-0.844322	-1.84771	-1.06749	0.134984	-0.0957745	0.136836	-0.212634	-0.505539	0.511556	0.734208	-1.79037	-0.372869	-1.67054	-2.44118	0.482352	-1.34162	-1.44866
Cenpu	+	1.1572	1.61039	2.15208	2.46041	1.30947	1.62421	0.0139179	0.360607	0.882819	0.387157	-0.0352342	-0.140324	-1.21221	0.238443	-1.56554	-0.985335	-1.46326	-0.922643	-0.707335	-0.967446	0.0714768	-0.406727	-1.8376	-1.19953	-0.211984	0.293856	-0.47992	-0.195841	-0.33714	1.18031	0.861844	0.321041	0.0266736	-0.201156	-0.475811	-0.537266	0.270948	-0.394419	-1.02122	0.0750931
Cenpv	+	1.17232	1.12887	1.52531	1.30914	1.09707	0.897436	1.38518	1.24546	0.874043	1.08642	1.18626	1.09423	0.683235	0.804665	0.538175	0.758609	0.520065	1.06955	-1.00408	-0.779226	-1.34809	-1.42761	-1.21338	-0.929356	-0.935094	-0.61849	-1.01243	-0.924099	-0.960921	-1.1325	-0.813474	-0.0662969	-0.0715958	-0.329814	-0.426412	-0.343268	-0.390394	-1.06613	-1.15919	-1.42417
Cep131	+	0.200367	-0.0840557	-0.76989	-1.39758	-0.317728	-1.0571	-0.193256	-0.0668441	-0.152249	-0.072296	-0.922547	-0.105347	1.73428	1.56246	1.43423	1.26681	1.56184	1.46949	-1.08345	-0.698431	-0.357239	-0.808491	-0.994649	-1.31911	-0.235575	0.452529	0.0155562	-0.883445	-2.7345	-1.04365	-0.141482	0.447463	0.522206	0.805563	1.51478	1.25326	0.792739	0.0478272	-0.00115465	0.358682
Cep152	+	-0.118676	-0.0309923	-1.78802	0.843911	0.383661	0.353664	-0.574244	0.126073	-3.08257	-0.739302	-0.395123	0.402335	-0.994271	0.12921	0.9789	-1.0326	-0.469471	-0.643605	0.313208	0.768941	0.447032	-0.747166	0.997076	-0.650774	-0.0986649	-0.789798	0.828947	1.3756	1.398	2.04507	1.14771	0.547971	0.952947	-0.383374	-1.09721	-0.202651	0.050073	-1.13744	-0.698645	1.58427
Cep164	+	-1.17954	-1.10518	-0.182844	-0.36457	-0.63111	-0.899439	-0.475018	-0.259177	-0.869186	-1.83804	-1.23035	-0.476435	-1.59366	-0.747677	-1.44349	-0.778043	-0.366209	0.560682	0.389488	1.2688	0.611737	0.274897	1.05188	0.198212	-0.0929126	-0.234367	1.76666	1.71899	2.44844	1.28347	1.30232	0.51707	0.102566	-0.302129	-0.704834	-0.175394	-0.399121	0.905388	1.00385	0.944265
Cep170	+	-1.21764	-1.22281	-1.53138	-1.5593	-1.75414	-1.488	-0.882716	-0.980328	-1.03769	-0.950555	-1.02876	-0.937368	0.740626	0.607814	-0.109117	-0.0219687	0.545173	0.597568	0.163742	0.214653	0.00241211	0.00208506	0.0218734	0.136189	0.164772	0.17722	-0.278365	-0.185247	-0.0563537	-0.173855	-0.150244	0.44011	0.636312	1.56908	1.4689	1.43546	1.41007	1.76584	1.6996	1.76633
Cep170b	+	-1.15226	-1.60273	-1.28584	-1.11021	-1.99847	-1.84572	-0.815253	-0.827785	-1.46208	-1.82142	-1.5207	-1.05433	0.734685	0.661119	-0.0163799	0.0170312	0.523192	0.32051	0.335079	0.471251	0.615474	0.59226	1.05455	0.945362	1.3031	1.27875	0.109018	0.2481	0.332999	0.0238241	-0.080589	0.310409	0.155269	0.688334	0.737566	1.34281	1.0939	1.0219	0.679597	0.997675
Cep250	+	-0.000835111	0.125197	-0.0199376	0.0129248	-0.141041	0.0969202	0.182361	-0.300785	-0.244252	-0.448739	-0.136999	-0.600163	-0.540613	-1.43142	-0.33941	-0.341545	-0.739493	-0.480984	0.937301	0.602185	0.822297	0.572334	1.00366	0.785321	0.688959	0.70507	0.690746	0.536263	0.478009	1.22598	1.32418	0.820034	0.786614	-2.80704	-3.00994	0.15104	-2.55026	0.707778	0.209707	0.66859
Cep41	+	-0.481178	-0.530752	1.36008	-0.324214	-0.749014	-0.125034	-0.493348	-0.820952	-0.75575	0.0739541	-0.0919548	-0.456184	-0.351606	-1.02094	-1.99045	-1.82853	-1.20578	-0.830265	-0.0754259	0.0377611	0.400442	-0.316223	0.250714	-1.36243	0.872641	-0.844654	-0.289007	1.08035	0.169551	0.427908	-0.770295	0.277817	0.870184	0.837407	2.26084	1.03955	2.49838	1.27529	0.56965	1.41146
Cep43	+	-2.86769	-1.77216	-0.573161	-1.65667	-1.07183	-0.546727	-0.171085	-0.236904	-0.408431	-0.9063	-1.77038	-1.27634	0.906857	1.08172	0.778255	0.568546	0.930624	-0.273997	0.486968	0.516304	-0.0703389	-0.025184	-1.31588	0.825023	0.462658	0.0639228	0.687384	0.300794	-0.455372	0.910978	0.479421	-0.209362	-0.442693	1.3622	0.417269	0.566449	1.62715	1.13359	0.844622	1.09976
Cep55	+	0.347419	0.15268	0.388147	0.322099	0.115103	0.227404	-0.25424	-0.0989975	-0.114098	0.445082	-0.209841	-0.145844	-2.31341	-2.03196	-2.58946	-3.26001	-0.899941	-0.751575	0.458729	0.651938	0.0347003	0.127293	0.299435	0.139659	0.219005	0.40977	0.801955	0.961553	1.07013	1.18867	1.25496	0.348084	0.108759	0.309663	0.633489	-0.374827	-0.559481	0.892731	0.870603	0.824623
Cep57	+	0.130253	-0.294198	-1.1127	-0.951866	0.563722	-0.770235	-0.453592	-1.38169	1.20714	-0.457648	-0.793684	-0.0760212	-1.09111	-0.796948	-0.84937	-1.18359	-0.126427	-0.35705	-0.453096	1.02392	1.41434	1.31179	1.22926	-0.2765	0.856968	0.781118	-1.32408	-1.11216	-1.41527	-1.08841	1.05763	1.28507	1.36481	-0.239257	0.00376134	-0.229367	-0.39201	1.7099	1.52649	1.7601
Cep63	+	0.291101	0.298479	0.840332	1.0336	0.113692	1.01488	0.436246	1.07734	-0.408206	0.235073	-0.994422	-0.20582	-1.90893	-1.25459	-0.910098	-2.23227	-1.77547	-0.583993	0.176783	1.56081	1.25638	0.00375015	-0.398067	0.399454	0.471799	0.424226	0.315343	1.07083	0.635195	0.796508	0.522584	-2.22024	1.20438	-1.35415	0.746785	0.495009	-0.114619	0.751728	-1.30767	-0.50376
Cep68	+	-0.660196	-0.0487367	-0.13038	0.371967	-0.583884	-1.33697	-0.351287	-0.407879	-0.876604	-2.49192	-0.633262	0.812415	-0.943088	-0.126964	-1.27105	-2.10564	1.54363	0.639896	-0.119764	0.547938	0.770671	-0.475043	0.80466	1.3909	0.972767	0.752581	-0.461238	1.10314	0.0443077	-1.03151	0.225089	0.331025	-0.954557	1.33835	1.20276	-0.33619	1.78475	1.57365	-0.532058	-0.332265
Cep85	+	-0.363516	-0.274845	0.0872261	-0.260919	0.37422	-0.3616	1.58513	-0.297084	-0.95865	-0.156556	-0.824403	-1.80963	-1.22475	-1.24728	-0.376017	-0.299569	0.203818	-1.15215	1.10411	0.666301	0.982825	1.1069	1.82043	-1.25565	-1.2372	-0.0237007	1.04514	0.987278	0.810573	1.15171	1.7801	0.981151	0.749282	-0.270631	-2.09936	-1.49207	-0.331438	0.655353	0.102603	0.122855
Cep97	+	3.25339	0.529672	1.44305	0.448803	-0.600957	-0.0117721	-0.631675	-0.12142	-0.0770488	-0.660112	0.52786	-0.81256	-0.105832	-1.19545	-2.13114	-0.903768	-2.31837	0.289098	0.280227	0.187761	0.542831	0.904942	-0.0172021	1.90751	-0.519937	-0.783586	-0.107252	-0.43751	-0.199333	-0.831479	-0.190287	0.974148	1.61505	0.192742	0.323234	-0.0973847	-0.502434	-0.227033	-0.561243	0.624469
Cept1	+	-0.658671	-0.492358	0.675745	0.826461	-0.825046	0.285699	0.416141	0.118987	-0.747867	0.135688	-0.815899	-0.422506	1.57012	0.892114	1.96639	2.35639	1.16434	0.792213	-0.761813	-0.798475	-0.732457	-0.782521	-0.174167	-0.940036	-1.83085	-1.34155	-1.03346	-0.4773	-0.857762	-1.2804	-0.82857	-0.199958	-0.467521	1.60201	0.387401	-0.256974	0.187494	1.60454	0.566884	1.17754
Cercam	+	-0.998838	-1.38155	-0.36026	-0.235931	-0.972183	0.103595	0.234476	0.144564	0.239446	0.408462	-0.0842333	0.30394	1.00066	1.09201	1.03744	1.18523	0.101308	0.617715	0.390544	-0.0635598	-0.0124735	-0.37997	0.116718	-2.90423	0.458557	0.460791	-3.87667	-0.746337	-0.233762	-0.227033	-0.920024	0.772313	0.562596	0.272485	0.600724	1.0011	0.563652	0.841333	0.500152	0.387252
Cers2	+	0.592324	0.83448	0.58192	0.587761	0.594412	0.576646	0.322232	0.283722	0.702806	0.524046	0.485502	0.54651	1.29276	1.36633	0.985515	1.03138	1.1747	0.920312	-1.16817	-1.06481	-0.915838	-1.11594	-0.94179	-0.62369	-0.652177	-0.321653	-2.37918	-1.71784	-1.82454	-1.74161	-1.31327	-0.557762	-0.389554	0.895147	0.907325	0.793305	1.18377	-0.275589	-0.0916354	-0.0878583
Cers5	+	1.21829	1.24396	1.88591	1.75395	0.643273	1.02995	0.909382	1.26603	1.23458	1.29005	0.975343	0.656861	-0.925879	-0.584032	-0.0942799	-0.0542612	-0.509594	-1.51282	-0.753957	-0.699776	-0.691349	-0.688906	-0.523823	-0.116259	-0.055965	-0.325018	-0.303632	0.0542285	-0.391364	-0.512892	-0.482027	-0.292151	-0.24059	0.982372	0.923001	-0.132155	-0.213951	-2.17881	-1.99523	-1.78846
Cers6	+	0.0272271	0.00500735	-0.566806	-0.178275	-0.292511	-0.265034	0.0941326	0.0118436	-0.0330185	0.30638	0.158739	0.205187	1.26884	1.39914	1.13664	1.24417	0.943313	1.19753	-0.905966	-0.895374	-0.620601	-0.882912	-0.620876	-0.1698	-0.564804	-0.378808	-1.87185	-1.90618	-1.38341	-2.03829	-1.80653	-0.0968312	-0.287362	1.52856	1.5215	1.2834	1.14015	0.84436	0.700983	0.748139
Cert1	+	-0.783882	-0.742246	-0.542285	-0.640239	-0.624858	-0.324384	-0.621628	-0.464285	-0.592367	-0.47047	-0.78301	-0.351864	-1.49468	-1.39999	-1.80766	-2.13948	-1.05291	-1.71402	1.1715	1.09988	1.42888	1.25054	1.31401	1.17089	1.38922	1.14266	0.549864	0.721627	0.702428	0.811445	0.768652	0.649891	0.565045	-0.727129	0.457204	-0.31421	-0.0235344	0.797415	0.908085	0.715881
Cetn2	+	0.1929	0.87948	1.55282	1.0859	0.436657	0.328868	0.608069	0.295649	0.484169	-0.396067	0.144857	-0.296788	-2.05675	-0.915352	-2.25378	-2.9617	-1.15586	-1.55337	0.591667	0.599093	-0.92104	0.17193	0.173705	0.0954398	-0.0904981	0.107267	0.373565	-0.246388	0.230207	0.263623	0.302755	1.37379	0.983996	0.0907701	-0.846455	-1.08804	0.0545834	1.32798	1.11173	0.920606
Cfap20	+	0.676527	0.854659	1.02111	0.861573	0.0769415	0.355268	-0.145782	-0.893639	-0.33359	-0.412307	-1.23278	0.403233	-1.62454	-1.6446	-2.5087	-2.10785	-1.90906	0.0763068	0.506244	-0.678909	0.597465	-0.236635	-0.515541	1.23353	1.14509	1.55708	-0.272631	0.0625453	0.082475	0.939845	1.10911	0.425334	0.594926	1.67308	-0.295712	-0.0395865	-0.648792	0.702814	0.127679	0.417807
Cfap298	+	0.153488	0.0471081	0.157805	0.576246	0.0349811	-0.0229599	0.0796855	0.0796612	-0.0853422	-1.84034	-0.37545	-1.6887	-2.52361	-2.61098	-0.100624	-0.0759349	-0.140752	-0.366801	0.591925	0.543355	0.747917	0.616709	0.763554	0.527007	0.483329	0.527991	1.09707	1.13145	1.33679	0.980231	1.04673	0.648765	1.03446	-0.500631	-1.68488	-1.13352	-1.68139	0.526	0.566448	0.533199
Cfap36	+	-1.50019	-0.538905	-1.04376	-1.05975	-0.410969	-0.642995	-0.806695	-0.910718	-1.30218	-1.55484	-1.19905	-1.21544	-0.904307	-0.402025	-1.53586	-0.70425	-0.389998	-0.97619	1.34942	1.118	0.826411	0.510026	0.677994	0.963048	1.09257	0.752157	0.624558	1.17546	1.13302	1.07944	0.292258	0.827769	0.806742	0.360826	0.433956	-0.997231	-0.19151	1.38776	1.39164	1.48379
Cfap418	+	-0.203945	-0.871623	-0.428728	-0.299873	-0.638615	-0.413557	-0.0567361	-0.290104	-0.514152	-0.471963	-0.18838	-0.647334	-1.00065	-1.71714	-2.15674	-1.50544	-1.90421	-1.25253	1.01139	0.977655	0.826882	0.718093	0.922945	0.875802	0.902984	0.993455	1.12438	1.13752	0.984896	1.00142	1.24943	0.918474	1.03685	0.212291	0.285036	-1.39973	-1.39517	0.842702	0.744245	0.590167
Cfdp1	+	-0.51675	-0.559842	-0.53454	-0.548072	-0.616457	-0.434777	-0.536172	-0.484237	-0.474791	-0.579472	-0.770123	-0.430974	-0.613447	-0.760507	-1.93305	-2.21639	-0.506921	-0.814177	1.28292	1.19635	0.993532	1.16974	0.90359	0.860153	0.712695	0.699175	1.17889	1.33257	1.32466	1.44897	1.42246	0.808319	0.927667	-1.20559	-1.18456	-1.08604	-1.1532	0.545925	0.513391	0.63908
Cfl1	+	-0.968802	-1.01407	-0.641583	-0.734067	-0.976147	-1.00066	-0.83178	-0.920703	-0.677368	-0.67298	-0.898863	-0.892347	-1.31964	-1.35107	-1.405	-1.49036	-1.08782	-1.03556	0.965909	0.956849	1.14444	1.21683	1.05876	1.31468	1.24814	1.14774	0.465813	0.220305	0.344183	0.700734	0.754061	0.643408	0.701653	0.496489	0.431673	-0.167076	-0.245935	1.50299	1.57888	1.43829
Cfl2	+	-1.54613	-1.54039	-0.724538	-1.14598	-1.49627	-1.62797	-0.884362	-0.970989	-1.23687	-0.934573	-1.11517	-1.2452	-0.711884	-0.616871	-0.259683	-0.114507	0.00502975	-0.187945	0.50313	0.692211	0.784269	0.750479	0.864438	0.724329	0.895401	1.00699	-0.00623865	-0.00427684	-0.241098	0.230365	0.248327	0.665702	0.63956	0.907129	1.02898	0.577704	0.2761	2.01978	1.93644	1.85459
Cggbp1	+	-0.685494	-0.8186	-0.712522	-0.396392	-1.33305	-0.803179	-0.579265	-1.08058	-1.70028	-1.4821	-0.800109	-0.817894	-1.51554	-0.781974	-1.26603	-0.986293	-0.601647	-0.471529	0.410479	0.675764	-0.0951262	-0.165269	0.324265	0.836301	1.78464	1.79864	0.307302	0.235985	0.356661	0.792855	0.196086	0.596514	0.394178	0.600712	1.99736	0.666672	1.31079	1.09502	1.54599	1.16666
Cgn	+	0.299262	0.336085	0.1725	0.159025	0.24897	0.405799	-0.0224238	-0.0118846	-0.0740407	0.14951	-0.189867	-0.0531084	-0.295949	-0.95997	-1.02072	-1.76184	-1.10387	-0.779143	0.692696	0.682166	1.42337	1.4118	1.4596	1.97011	1.99138	1.9616	0.202747	0.428768	0.183946	0.36902	0.289045	0.0632663	0.0123349	-0.499651	-0.717093	-1.39188	-1.10682	-1.7699	-1.86046	-1.29438
Cgnl1	+	-0.377362	-0.336621	-0.849407	-0.297749	-0.714541	-0.349767	-2.101	-0.947191	-1.23318	-0.854079	-1.81478	-1.11722	-0.830314	-0.0941699	-0.828955	-1.37211	0.0721737	-0.269545	0.266782	0.804593	1.38379	1.08501	1.38271	1.73001	1.87064	2.02327	-0.139001	0.511499	-0.0189164	0.492739	0.704832	1.2755	1.27331	-0.321426	-0.297067	-0.555512	-0.167077	0.488725	-0.170386	0.691783
Cgrrf1	+	-1.23341	-0.562109	-0.291544	0.192022	0.174123	0.191552	-0.861042	-0.54956	-0.512638	0.518646	-0.0724716	-0.912833	1.52386	1.78921	-0.895012	-0.431116	1.50349	-0.368516	-0.0850855	-0.727368	-0.350216	0.469285	-0.733308	-1.06462	-0.224058	0.59071	-0.342145	-0.511667	-1.15053	-2.29289	-0.71705	-0.816984	-0.743367	1.44345	1.78807	1.37216	1.88121	1.26996	1.16894	0.572855
Chaf1a	+	1.40086	1.49811	0.441646	1.2416	0.927098	1.38338	0.450288	0.451758	0.159095	0.510632	0.00605184	0.608186	0.272413	1.10554	-0.0703093	-1.62746	1.31043	1.77415	-0.666567	-1.52236	-1.23353	-1.68167	-0.467051	-1.49541	-1.1601	-0.881385	-1.24269	-0.841333	-1.05045	0.312197	-1.36913	-0.663696	0.0528156	-0.92885	0.658007	0.336888	0.584502	-0.0529341	0.496657	0.972631
Chaf1b	+	0.838854	1.10276	1.4362	1.30671	0.977785	1.31633	0.888801	0.8792	0.335338	0.468988	-0.10113	0.135389	-0.0716762	0.335819	-1.99131	-0.927708	0.409698	1.30549	-0.405756	-1.74452	-0.974021	-2.50219	-0.224127	-1.00886	-0.0624313	-1.30255	-0.969684	-0.0936572	-0.842535	1.08813	1.374	0.0363854	0.4798	-0.296545	-0.938422	-1.31495	-0.061514	0.548469	0.817817	-0.248344
Champ1	+	1.06486	1.46786	0.771671	1.27374	0.372752	0.778567	0.261536	0.367174	0.447373	0.472919	0.230724	0.262779	0.750004	0.526959	0.188433	0.0932935	0.842232	0.245146	-2.0712	-1.44348	-1.64144	-1.42944	-1.3606	-0.226339	-0.139882	-0.128977	-1.21391	-0.865798	-1.40423	-0.697974	-1.0502	-0.849796	-0.428216	1.32685	1.03655	1.6461	2.04805	-0.27705	-0.699317	-0.547708
Chchd3	+	1.10453	0.885167	1.56318	1.62379	1.12213	1.11655	1.0712	1.05601	1.09567	1.07453	0.986738	0.999314	0.528202	0.662818	1.04682	0.847016	0.27159	0.348015	-0.46333	-0.303799	-0.379567	-0.512554	-0.585235	-0.754101	-0.812061	-0.658926	-0.680415	-0.687712	-0.843296	-1.03386	-0.912998	0.0749987	0.173713	-1.00581	-1.29421	-0.541937	-0.586802	-1.86996	-1.98396	-1.74144
Chchd4	+	0.407743	0.383312	0.559401	0.296538	1.24674	1.11307	0.848635	0.396073	1.19843	1.03559	1.52725	1.45425	0.704228	-0.166184	0.60752	0.154195	0.371115	-0.274208	0.315802	0.491963	-0.114528	0.0483296	-0.508058	-0.768648	-0.990577	0.0525751	-0.538959	0.365191	0.0813788	-0.241268	0.423671	-0.505376	-1.00883	-2.75388	-3.23507	-1.4688	-1.39281	-0.157181	0.357106	-0.315739
Chchd5	+	0.263812	0.134542	0.169592	-0.207566	0.26976	0.284922	0.302384	0.478314	0.412738	0.399672	0.386966	0.444303	0.166206	0.228249	0.0300904	0.24129	0.118181	-3.16306	0.41214	0.455995	0.36349	0.363983	-2.98994	0.303179	0.322195	0.483463	0.53825	0.602558	0.582292	0.460972	0.559035	0.610707	0.314258	0.444676	-3.06901	-2.3964	0.0641332	0.0393646	0.312197	0.262064
Chchd6	+	0.110257	0.189274	0.186406	0.309732	0.429243	0.393584	0.468383	0.622713	0.352235	0.415513	0.769519	0.905342	0.863527	0.674245	0.883555	1.04784	1.25714	1.15107	-1.42308	-1.01205	-1.55945	-2.19603	-1.47448	-1.41133	-1.02663	-1.16224	-0.804126	-0.703591	-0.886281	-0.989602	-1.18747	-0.781879	-0.841899	1.69762	1.6833	0.788198	0.704195	0.607455	0.379156	0.570619
Chchd7	+	0.0772916	0.474147	0.492776	0.370566	0.406163	0.563941	0.532854	0.949485	0.0248161	0.431127	0.706985	0.538762	1.73191	1.23595	2.00706	1.9083	1.70706	1.49143	-1.11491	-0.88453	-0.836435	-0.864637	-1.02651	-1.38313	-1.64137	-1.1367	-0.983456	-1.18221	-0.758942	-1.2831	-0.979936	-0.705836	-0.756457	0.735114	0.391676	0.176852	-0.441099	-0.0327792	-0.454208	-0.488014
Chd1	+	0.524607	0.680764	0.581477	0.635722	0.400294	0.50232	0.413445	0.174823	0.0353755	0.363764	0.316218	0.281852	-0.905267	-1.43838	-1.5616	-1.37519	-0.869331	-0.610901	0.495793	0.587351	0.559081	0.320359	0.67252	0.955954	1.03691	1.0546	0.844663	0.650941	0.638138	1.05033	0.972513	0.708234	0.893537	-2.34678	-1.70091	-1.98293	-2.45311	-0.389156	-0.486614	-0.231416
Chd1l	+	0.46154	0.395316	0.720561	0.609054	0.207237	0.393796	0.291435	0.199738	0.179425	0.144427	-0.0764768	-0.00893677	-2.61097	-1.93778	-2.73752	-1.2203	-2.95876	-1.37316	0.420903	0.579965	0.66176	0.757989	0.645117	0.606072	0.619942	0.941103	0.6261	0.360079	0.485328	0.842272	0.731651	0.823092	0.853701	0.0161849	-0.160758	0.0286233	-0.041991	-0.294885	-0.2385	0.0576331
Chd2	+	-0.68767	0.507888	1.56461	0.239881	-0.183984	0.318265	-0.255502	0.538088	0.0851959	-0.295933	-0.462605	-0.779071	0.478215	0.89855	1.52358	1.7727	2.18559	1.38248	0.269709	-2.03593	-1.96734	0.833658	0.448364	-0.53255	-1.61021	-0.401799	0.587194	-0.623064	0.600446	0.269521	-0.404294	-0.466719	0.289885	-0.0421331	0.0723961	-1.23476	0.447328	-2.28902	-0.479897	-0.561056
Chd3	+	1.10086	0.848713	1.86345	0.855937	1.25663	1.01548	0.944472	0.557071	0.3569	0.568583	0.900923	0.122706	-0.72044	-1.56051	-2.08936	-1.5548	0.262108	-0.813075	0.781576	-0.111795	-0.0510431	-0.0229009	0.327003	-1.27025	0.0125851	-1.46317	-0.823911	0.235053	-0.240002	1.11579	0.325942	1.52274	1.61954	-0.568542	-0.891759	-0.939767	-0.792705	-0.68878	-0.42718	-1.56407
Chd4	+	1.00026	1.04105	1.77436	1.64265	1.45134	1.26955	1.11336	1.30924	0.560195	0.44068	0.835163	1.00551	0.152313	0.361315	-0.416391	-0.267508	1.01106	0.735563	-0.588946	-0.358371	-0.305742	-0.26049	-0.515778	-0.25779	-0.0609246	-0.672227	-0.79299	-0.690333	-0.791454	-0.308434	-0.269059	0.160381	0.405084	-1.83637	-1.15751	-0.201169	-0.651483	-1.78194	-1.9634	-2.12075
Chd7	+	0.899651	0.872361	1.76896	1.69607	0.947938	1.10982	0.502149	0.297817	-0.0843975	0.390788	-0.300655	-0.0543157	-0.512346	-0.490111	-1.08824	-2.00446	-1.78197	-0.811985	-0.861213	-1.23953	0.394865	0.181681	0.615197	0.864815	0.843999	1.14458	0.197858	0.255234	0.770386	1.18814	0.803253	0.137656	0.12877	-0.434429	-0.505465	-1.32041	-1.16517	-2.24899	-1.43062	0.322323
Chd8	+	0.426508	0.563297	-1.50335	0.0949976	0.573562	0.673432	0.0509017	-0.0661429	0.255597	0.228691	-0.345888	0.0821471	-0.923999	-0.628155	-3.68188	-2.48422	-1.2375	-1.14743	0.225515	0.870934	0.299935	-0.124714	0.932576	0.36839	1.25243	0.533677	0.163243	0.860742	0.416737	1.20766	0.454537	1.02676	1.39741	0.0536981	-0.840285	-0.793748	-0.344231	0.37269	0.122291	0.613188
Chek1	+	-0.0199705	-0.875842	-0.323635	-0.234417	-0.541626	-0.895618	-0.689951	-0.235215	-1.52982	-1.20759	-0.866401	-0.156779	-0.595816	-1.61697	-1.59992	-1.76436	-1.25847	-0.55478	0.126601	0.377291	0.580057	0.371282	0.224845	0.2308	1.3577	-0.367965	1.58439	1.3773	1.47426	1.65676	0.805826	1.02475	0.609342	-1.47591	1.49765	1.03566	0.782213	0.866664	0.29696	0.530712
Chek2	+	0.113267	0.926064	0.259464	0.24694	0.500921	0.426742	0.474395	0.346057	-0.0654854	0.121944	0.375774	0.213767	-1.0157	-2.37786	-1.24209	-2.20207	-1.68903	-1.21673	0.687104	0.652857	0.760777	0.859353	0.721665	1.02644	0.78461	0.995061	0.601068	0.69014	0.819422	0.876625	0.843723	0.958192	1.08789	-1.07588	-2.45941	-0.670349	-0.72176	-0.664407	-0.358777	-0.610722
Cherp	+	1.69975	1.55607	1.48869	2.06233	1.77329	1.64835	0.890684	0.994276	0.806926	0.39626	0.602796	0.9991	-0.0524596	0.292535	0.202257	0.777827	0.548359	0.557801	-0.931997	-0.602367	-0.560042	-1.15296	-0.777221	-0.604204	-1.1028	-0.791605	-1.3013	-1.2368	-1.25374	-0.663354	-0.821501	-0.827756	-0.703414	-0.15853	-1.15523	0.0128646	-0.692859	-0.576676	-0.995588	-0.347768
Chid1	+	0.108139	0.0342111	0.614071	0.609071	0.154063	0.0115166	0.82561	0.751101	0.683288	0.310511	0.147409	0.508389	0.61312	0.785702	1.90761	1.73582	1.49282	1.44961	-0.901715	-0.93746	-0.77155	-1.17725	-0.583661	-0.610628	-0.707326	-0.703791	-1.56615	-1.31789	-1.49604	-2.05098	-1.73704	-0.378641	-0.937328	1.07899	1.15861	0.215813	1.18898	-0.00871882	-0.292824	-0.205478
Chkb	+	0.470518	-2.15619	0.717918	0.826664	0.440425	0.337214	0.25494	-0.12107	0.363517	-0.147949	-0.107603	-0.0313714	-0.103884	-2.90574	-0.720838	-0.516515	-2.39018	-1.88093	0.618006	0.755072	0.803698	0.571761	0.601998	0.872038	0.791377	0.713384	0.632285	0.650503	0.514152	0.772762	0.714941	0.668738	0.744697	-0.266233	-1.55804	-1.34603	-1.16299	0.53081	0.449077	0.599071
Chm	+	-0.636011	-0.541913	-0.412221	-0.19049	-0.683418	-0.696169	-0.112459	-0.274907	-0.71875	-1.04279	-0.538507	-0.681445	-1.9655	-1.74192	-1.45496	-1.06259	-0.389259	-1.61111	1.21207	0.920884	1.09297	1.12375	1.15885	0.935534	0.885227	0.995503	0.584174	0.801818	0.741112	0.982517	0.830882	0.839277	0.927268	0.282326	-1.26816	-1.14327	-0.849048	1.18806	1.28666	1.22602
Chml	+	-0.968088	-0.725385	-0.0175592	-0.388917	-0.991254	-0.291783	-0.703923	-2.01853	-0.825986	1.11732	-0.450733	-1.15729	-0.911381	-1.10637	-1.05499	-1.41453	-0.865613	-0.721689	0.752756	0.637177	1.35887	1.07281	1.05062	1.54352	1.43361	1.64434	0.820319	1.1145	0.818039	1.2614	1.30886	0.687706	0.698396	-0.954785	-0.159434	-0.247836	-1.25127	-0.009167	0.276893	-0.36065
Chmp1a	+	-0.465549	0.0297081	-0.273456	-0.741259	-0.219676	-0.339003	-0.0296772	-0.0899826	-0.711545	0.364978	-0.187881	-0.112775	-0.965774	-1.93616	-1.61029	-2.19542	-0.777889	-1.96212	1.75322	1.00915	0.540351	0.454526	0.911831	0.887963	0.733713	0.414833	1.89644	1.74924	1.37173	1.54935	0.915709	0.652129	0.292585	-0.703435	-0.38372	-0.118059	-0.750638	-0.369873	-0.208645	-0.374633
Chmp1b1	+	0.528358	0.44819	0.0449578	-2.79791	0.245944	0.419628	0.21146	0.242968	0.433607	0.469911	0.570446	0.52986	-0.922316	-0.850833	-1.18127	-1.15797	-0.863109	-1.12591	0.80561	0.864701	0.716314	0.727656	0.831229	1.17725	1.02171	0.888891	0.621665	0.496021	0.514103	0.433752	0.539299	0.548859	0.43189	-0.535911	-0.460788	-0.560293	-3.71942	-0.12354	-0.118189	-0.346836
Chmp1b2	+	0.723057	0.77114	-0.309122	-2.08186	-0.779726	1.11137	0.137309	0.110243	0.160899	0.586417	0.740382	0.366044	-0.694757	-0.343374	-1.57601	-1.6039	-1.0929	-0.722876	1.13709	1.19455	0.972229	0.355694	0.547638	0.766489	0.336774	0.446725	0.3413	0.533068	0.83989	1.47493	0.965051	0.890139	0.956542	-0.894809	-2.72999	-1.50582	-0.705426	-0.17698	-1.07795	-0.169463
Chmp2a	+	0.0488446	0.0670175	0.0764549	-0.198911	0.244144	-0.017666	-0.303716	-0.290569	-0.0575034	-0.140443	-0.197011	-0.198397	-1.29095	-1.44467	-1.37244	-1.44888	-1.23482	-1.65547	1.44476	1.68239	1.33157	1.39364	1.23718	1.07643	0.990131	1.09515	0.5663	0.565424	0.704962	0.972107	0.979713	1.08467	0.960076	-1.34076	-1.26278	-1.49579	-1.34112	-0.419785	-0.275077	-0.534197
Chmp2b	+	-0.0687776	-0.233845	-0.251662	-0.577163	-0.237224	-0.271282	-0.111627	-0.157264	-0.0869438	-0.229564	0.0373783	-0.31087	-1.34095	-1.73722	-1.50724	-1.65808	-1.9723	-1.51052	1.34882	1.14508	1.06069	0.964318	1.04952	0.830893	0.744182	0.981297	1.4293	1.35227	1.29206	1.14655	1.18442	0.779777	0.732488	-0.849618	-0.673826	-1.17953	-1.30617	0.186513	0.0525124	-0.0463865
Chmp3	+	-0.465325	-0.383979	-0.865815	-0.670161	-0.336593	-0.28445	-0.203278	-0.385386	0.00613601	-0.369898	-0.197008	-0.0590263	-1.45789	-1.3301	-1.59745	-1.60912	-1.72138	-1.65212	1.3459	1.31795	1.35552	1.38075	1.36834	1.21397	1.18708	1.18089	0.956192	0.853676	0.820838	0.791222	0.784004	0.924739	0.738589	-0.978005	-0.790765	-0.964603	-0.924375	0.466516	0.337897	0.216515
Chmp4b	+	-0.662876	-0.759685	-0.882553	-1.10529	-0.33935	-0.267422	0.055998	0.0563283	-0.168121	-0.20873	0.180137	0.408356	-1.36727	-1.48604	-1.91721	-1.50277	-0.535646	-0.608926	1.96935	2.04921	-0.038449	-0.23221	-0.134884	-0.410866	-0.0813137	-0.387262	2.23615	1.91477	1.79746	-0.150979	-0.135108	-0.195364	-0.393113	0.459259	0.0498852	-0.200337	-0.371266	1.19577	1.26541	0.904968
Chmp4c	+	-0.742739	-0.338686	-0.866897	-0.461008	-0.367128	-0.460335	-0.78566	-0.91767	-0.251689	-0.618847	-0.107894	-1.39075	-0.167544	-0.395006	-0.599713	-0.0901222	0.383519	-0.748075	0.740857	1.03089	1.34167	1.55434	1.48308	2.33671	1.98582	2.08232	-0.0989167	0.0461001	-0.196287	0.0193128	-0.194711	0.260364	0.025881	-0.638806	1.01516	0.5322	-0.358323	-0.518115	-0.849743	-2.67356
Chmp5	+	-1.15562	-0.738483	-1.1892	-0.255278	-0.607661	-0.379987	-0.336028	-0.831712	-2.35175	-1.09043	-1.0572	-0.700243	-2.51766	-0.727162	-0.662825	-1.15686	-0.68494	-0.836894	0.941845	1.4233	0.664419	0.939808	0.669445	0.86127	0.507067	0.419054	1.27548	0.584087	0.879878	0.817831	1.07203	1.019	0.760469	0.132691	0.396524	0.0457769	0.580474	1.09912	0.992062	1.19829
Chmp6	+	0.200065	0.631813	1.36643	0.539184	0.868729	1.04436	1.30143	0.951766	0.908428	1.44312	1.2251	1.42457	-0.298628	0.329816	0.352959	0.841192	-0.2132	-0.381343	-0.614095	-0.465053	-2.38436	-1.08477	-0.637654	-1.41299	-1.30067	-1.26783	-0.0289121	-0.573291	-0.972703	-0.0805006	-0.641736	-1.25924	-1.23873	1.01716	1.7217	0.678471	-0.525401	0.206964	-1.11096	-0.561183
Chmp7	+	0.688805	-0.553426	-0.406298	0.33248	0.0415371	-0.258615	-0.345009	0.444661	-0.128328	-2.06558	-0.260376	-1.46053	-0.421237	-1.66386	-2.44319	-1.18847	0.373231	-1.48581	0.4397	0.955286	0.544272	0.724878	0.871824	0.865022	0.440305	0.239111	0.672156	0.564649	1.41143	0.934081	0.935642	0.895568	0.856694	-2.14655	0.0262165	-0.0908126	-1.14943	0.714631	1.15368	0.941661
Chordc1	+	-0.503413	-0.46619	-0.563852	-0.558107	-0.788458	-0.662098	-0.747078	-0.614143	-0.500255	-0.69473	-0.658241	-0.855743	-1.31048	-1.70249	-1.83568	-1.75491	-1.3112	-1.30899	1.04967	1.00205	1.17722	1.15287	1.19988	1.43316	1.31263	1.32577	0.656953	0.755932	0.79986	1.04465	1.06767	0.625154	0.806962	-0.150352	-0.162897	-0.546325	-0.354855	0.878562	0.879019	0.882478
Chp1	+	0.514115	0.873593	1.00263	0.85775	0.811571	1.02512	1.0095	1.03357	0.563055	0.550336	1.19023	1.29253	0.605377	0.692644	1.42704	1.44621	1.28588	1.24106	-0.563059	-0.856246	-1.41465	-1.09184	-1.03106	-0.835456	-0.655542	-0.788717	-0.493425	-0.182244	-0.342567	-0.841523	-0.540025	-1.02399	-0.874624	-2.34121	-1.58435	-1.18598	-0.924777	-0.102842	0.137211	0.114716
Chpf	+	0.191949	-2.73853	0.169634	0.619309	0.58575	0.338399	0.82302	0.87215	0.117882	0.769661	0.579	0.543711	0.653474	1.23419	0.964676	1.06806	0.604059	-0.213056	-1.97549	-1.02095	-0.310765	0.516156	0.56629	-0.362876	-1.61058	0.0456954	0.324535	-0.519279	-3.04173	-0.873532	-0.763893	0.197602	0.659659	0.626158	0.742389	-0.759955	0.410697	-1.16154	0.502232	0.625839
Chpf2	+	0.0339187	0.313132	0.576896	0.47543	0.273652	0.206791	1.43253	1.69096	0.802745	1.26841	0.975249	0.864513	0.758969	0.342624	1.83564	1.8684	0.0835392	0.695483	0.265537	-0.699416	0.228044	-0.720684	-0.183556	-1.50463	-2.06299	-1.14289	-0.905256	-1.16105	-0.92621	-0.712843	-0.829668	-0.0830904	1.19562	-0.288691	-1.21192	-0.320305	-0.0691158	-1.08082	-1.92644	-0.35851
Chrac1	+	1.62825	1.61724	1.68515	1.90534	1.66611	1.93532	0.7263	0.630796	0.578015	0.601597	0.985332	0.547445	-0.819995	-1.7449	-1.63154	-0.673379	-0.558788	0.53841	0.132319	0.0274797	-1.44275	-0.793609	0.21912	-1.20738	-0.782603	0.0241167	-0.100778	-0.0113946	-0.187775	-0.402371	-0.275187	-0.24073	-0.619265	-0.251113	0.54557	-0.641303	-1.50918	-1.10431	-0.69471	-0.30086
Chst12	+	-0.136243	0.516895	0.133894	0.631744	-1.50267	0.604157	0.458218	0.407279	-0.150012	0.678419	0.0286886	-0.196484	1.08428	1.09194	1.38939	1.34869	0.810029	0.582236	-1.85575	-0.822038	-1.50716	-1.43209	-0.106733	-2.40816	-1.66432	-0.476681	0.32028	0.313627	0.384254	0.140119	-1.53281	-1.94701	0.106304	0.337514	0.339034	0.49734	0.437768	1.00427	1.16794	0.923851
Chst13	+	0.958942	0.849334	0.843804	0.721106	0.635478	0.643992	0.498284	0.814785	0.344984	0.357813	0.360718	0.435934	-2.0421	-1.062	-2.19329	-0.78666	-0.760569	-1.59144	0.931799	0.583836	0.564417	0.680075	0.519306	0.833631	0.784338	0.813159	0.482735	0.555235	0.368241	0.833931	0.533496	0.850731	0.884369	-1.05388	-1.72146	-1.19229	-1.43371	-1.12944	-1.16259	-1.55503
Chst14	+	-0.166872	-0.093739	-0.0871177	-0.0878326	-0.515857	-0.543629	0.146635	0.155778	-0.00748926	-0.0848447	0.0581471	0.0681391	1.51368	1.30103	1.50786	1.59997	1.19491	1.07334	-0.875552	-1.07211	-0.799737	-0.905429	-1.04738	-0.864475	-0.96211	-1.05059	-0.966511	-2.03266	-1.05568	-1.3713	-1.51032	-0.0898448	-0.137524	1.48212	1.34628	1.41425	1.31558	0.85004	0.676842	0.624
Chsy1	+	0.932658	1.22238	0.825252	0.699404	0.597526	0.974801	1.19151	1.03889	1.24419	1.48604	1.17264	1.24355	0.175788	0.869154	0.538041	0.543011	-0.110156	-0.158238	-0.112927	-0.345915	-0.316208	-0.787246	-0.405811	-0.78697	-1.31496	-1.12471	-0.539518	-0.505654	-0.312697	-1.09015	-0.288649	0.194616	0.160076	-0.169651	-3.63166	-0.683649	0.207708	-0.566108	-0.408609	-1.65773
Chtf18	+	0.149547	0.732351	0.0479727	0.431655	0.356314	0.510796	0.221161	0.325508	0.328185	0.35192	0.0457209	0.331548	-1.44695	-0.684515	-1.61253	-3.1572	-0.855107	-2.65163	0.604075	0.579604	-0.44032	-0.115553	0.189926	0.222187	0.923934	-0.429134	0.796583	1.16388	0.8175	1.02482	0.799033	1.02612	1.04814	0.00795747	0.211438	-0.324754	-2.31048	-0.0586753	0.643839	0.195137
Chtop	+	1.11315	1.28339	1.49784	1.87439	0.869397	0.955909	0.998289	0.793515	0.524458	0.673647	0.057357	0.331084	1.01184	1.39368	0.261333	0.438863	0.756522	0.479094	-1.26103	-0.922963	-1.43647	-1.26756	-1.05854	0.297773	-0.183812	0.471948	-1.13672	-1.49078	-0.877018	-1.47088	-0.673741	-0.00723407	0.356587	-0.658078	0.41638	-0.607771	0.312601	-1.44181	-0.683526	-1.99113
Chuk	+	0.257249	-0.0965644	-0.0833021	-0.0689962	0.227002	0.156716	-0.119525	0.22727	0.0176459	0.346766	0.0575082	-0.247649	-2.06222	-1.17684	-2.93003	-3.35705	-0.359316	-1.72526	0.703259	0.652745	0.53852	0.520325	0.254273	0.404574	0.348394	0.875028	0.362251	0.574776	1.04711	0.706894	0.204814	0.540498	0.631672	0.235928	0.111104	0.428906	-1.1779	0.989352	1.07374	0.910313
Churc1	+	-0.208718	-0.143768	0.087139	-0.265764	-0.074314	-0.100345	0.250946	0.153593	-0.164601	-0.402331	0.169085	-0.161511	-1.74856	-1.76458	-1.60984	-0.490756	-2.19697	-0.751782	1.01144	1.14554	1.01934	1.12761	1.09245	1.06755	0.849317	0.86209	0.825678	0.824344	0.764117	0.858614	0.854155	0.892405	0.948931	-1.01668	-1.47247	-0.718349	-2.54701	0.31173	0.339857	0.382409
Ciao1	+	-0.384851	-0.290006	-0.932635	-0.738032	-0.263836	-0.622829	-0.42777	-0.531858	-0.208847	0.261331	-0.417867	-0.164133	-0.830019	-1.16613	-1.91461	-2.40754	-1.47635	-1.61021	1.18719	1.04528	1.17432	1.11823	1.05041	0.761181	1.0234	1.03125	0.903336	1.07113	0.964598	0.846901	1.18425	1.25874	1.31006	-0.992338	-0.735245	-0.317132	-0.778205	0.442402	0.30678	0.269664
Ciao2b	+	-0.04079	-0.160733	0.160248	0.295448	0.0632945	-0.0511775	0.652807	0.481717	0.01506	0.347998	-2.16883	-0.0268497	-1.5318	-1.7176	-1.21722	-0.760176	-1.23043	-1.80654	0.368201	0.264673	0.666754	0.906054	0.945995	0.281396	-0.0106215	0.447404	0.540365	0.566623	0.854973	0.853847	0.848014	0.850308	0.845297	-2.15665	-0.644613	-0.758641	-1.43434	1.61284	1.3771	1.47062
Ciao3	+	-0.525646	-0.708062	-0.741709	-0.826976	-0.330812	-0.444578	-0.33275	-0.0418743	-0.0456547	-0.330912	-0.546205	-0.38162	0.880503	1.1272	-0.192539	0.289146	-2.11806	-1.61424	0.901844	0.941075	0.801518	0.688726	1.06886	0.698396	1.05594	0.811374	1.06022	1.04785	1.05193	0.604331	0.780042	0.811072	0.84991	-1.67456	-1.58114	-2.20973	-2.03966	0.323781	0.479232	0.413781
Ciapin1	+	-0.368463	-0.00441588	-0.0912862	-0.143267	-0.0621862	0.0379981	0.0513155	0.0710206	-0.342562	-0.156915	0.217148	0.189469	-2.28341	-2.30803	-2.21825	-2.09811	-0.861615	-0.655533	0.867076	0.91521	0.364363	0.550562	0.485991	0.377347	0.376967	0.398711	1.54503	1.36037	1.58486	0.864363	1.0978	0.0181179	0.279637	0.113259	0.29391	-1.64825	-1.17912	0.737061	0.8765	0.747332
Cic	+	0.281246	0.0632345	-1.64718	-1.48501	0.122127	0.033783	0.243304	0.392058	0.495153	0.102977	-0.421494	0.133777	0.921538	0.609688	1.2603	0.7436	0.00825826	1.0301	-1.04036	-2.39291	0.620798	-1.77547	-2.06274	0.405719	0.101991	0.258423	0.45066	-0.853458	-0.692124	1.33674	-1.67787	-0.156271	-0.802652	0.180482	-0.200465	0.494319	0.361271	1.5473	1.52994	1.47924
Cip2a	+	0.22831	0.187108	0.152812	0.0564994	-0.0911696	-0.236382	-0.28301	-0.0928314	-0.400125	-0.383491	-0.233831	-0.390325	-1.61679	-1.44856	-2.21814	-2.64144	-1.38247	-1.00858	0.635464	0.542225	0.530159	0.278685	0.459165	0.8051	0.778312	0.876087	1.00465	1.2521	0.988293	1.31706	1.28568	0.672232	0.730074	0.368398	-0.023471	-2.21519	-0.767836	0.949882	0.807512	0.527851
Cirbp	+	-0.961982	-0.797327	-0.633975	-0.714325	-0.576885	-0.913103	-1.37264	-0.98176	-0.430049	-0.674912	-0.590089	-0.410654	1.47593	1.24875	0.826878	0.227403	1.36721	1.27408	-0.0283261	-0.446186	-0.144844	0.0418867	-0.353075	0.434392	0.516262	0.62076	-1.67487	-1.64999	-1.39257	-0.905674	-0.929867	0.241577	0.61525	1.32521	1.42583	1.67759	2.39957	0.31794	0.255914	0.290676
Cisd1	+	1.18445	1.39781	0.174356	0.242606	0.445475	0.429215	0.75005	0.612624	0.975247	1.36752	0.875486	0.928443	-0.0874202	0.199386	-0.678616	-0.281647	-0.728387	-0.447151	-0.412725	-0.326081	-0.406396	-0.0542692	-0.14481	1.09446	0.929808	1.29277	-1.42196	-1.06607	-0.888918	-0.915916	-0.615651	0.911078	0.755392	0.17465	0.0987289	0.641277	0.167193	-2.16964	-2.51986	-2.48251
Cisd2	+	1.27644	1.56083	-0.322768	0.210544	0.739699	0.88617	0.983228	0.965233	1.22909	1.1797	1.67295	1.54204	0.678385	0.537551	0.234549	0.508566	-0.0739637	-0.697047	-0.173949	-0.0341931	-1.26387	-1.63453	-1.18768	-0.995693	-0.408683	-1.75908	0.456554	0.769199	0.761854	-0.0331716	0.00746833	-0.428159	-0.254875	0.185999	-1.07346	-0.575201	-0.915022	-0.959688	-2.34066	-1.25436
Cisd3	+	0.701821	0.705524	0.768211	0.752218	0.665283	0.535845	0.635165	0.691898	0.687109	0.640729	0.642299	0.648485	-1.05167	-1.14384	-1.05476	-1.10453	-1.29956	-1.24391	0.605472	0.643277	0.739091	0.700432	0.700755	0.900308	0.957214	0.931538	0.420489	0.393778	0.42906	0.241554	0.324111	0.717575	0.668741	-1.04359	-1.13426	-0.935471	-0.658619	-2.28979	-2.24637	-2.24161
Cit	+	-0.0307963	-0.253094	-1.20079	-0.811893	-0.204018	-0.417229	-0.10645	-0.422793	-0.763095	0.0263925	-1.09828	-0.184733	-1.46447	-0.872926	-1.65087	-0.372161	-0.906408	0.237098	0.0580604	-1.27579	-0.32012	-0.313712	-1.43542	-0.983786	0.606449	0.234944	-0.606129	0.4972	0.299277	0.668806	0.519287	0.532648	0.866265	1.9385	0.226825	1.49296	1.53455	1.98041	1.96033	2.01497
Ciz1	+	0.65684	0.975747	1.44215	1.62514	0.497874	0.332617	0.924008	1.09376	0.445695	0.745694	0.83453	0.742104	-1.11081	-0.632594	-0.405414	-0.180574	-1.72527	-1.81782	-1.53409	-0.784982	-0.667542	-0.841355	-0.652231	-1.43555	-1.63229	-1.45846	0.418354	0.590744	0.963836	0.189702	0.726074	1.07223	1.09801	0.194813	0.476531	-0.767311	-1.76305	0.394684	0.568394	0.399799
Ckap2	+	1.28846	1.6491	0.560233	0.892049	0.943508	0.596327	0.0698038	0.16952	0.101056	0.596131	0.0492202	0.420226	-1.0141	0.00921012	-2.49683	-2.60333	0.523717	0.741486	-0.915167	-0.421738	-1.16589	-1.54886	-0.896392	-1.47281	-1.06024	-1.05763	-0.36647	-0.151538	-0.522858	0.115797	0.219957	0.16097	0.403929	1.1654	0.790529	1.39571	1.05461	0.39862	0.696302	0.681976
Ckap4	+	0.225429	0.16032	0.184908	0.176387	0.379307	0.289141	0.791334	0.764917	0.843543	0.898149	0.850914	0.813365	1.62677	1.58951	1.83622	1.84168	1.30911	1.22883	-0.360864	-0.332267	-0.853426	-0.905988	-0.843829	-1.58402	-1.63444	-1.57096	-1.17584	-1.19539	-1.15604	-1.34553	-1.29837	-0.483141	-0.49113	0.135526	0.0747468	0.390497	0.35353	-0.478282	-0.526978	-0.527643
Ckap5	+	-0.669299	-0.665049	-0.324764	-0.322504	-0.540226	-0.71578	-0.697466	-0.892232	-1.01106	-0.932559	-0.984355	-0.738627	-1.7735	-1.40938	-2.56158	-2.15075	-0.312494	-0.426857	0.74127	0.486966	0.717487	0.644039	0.681428	0.458411	0.727251	0.801842	1.07773	0.889671	1.17054	1.4053	1.37969	0.835247	0.759758	0.326923	0.299569	0.271653	0.250247	1.08282	1.14731	0.973328
Ckb	+	-0.608036	-0.778989	-0.821922	-1.06264	-0.963597	-0.900658	-0.510001	-0.456322	-0.39975	-0.441783	-0.401007	-0.376878	-1.09172	-1.18911	-1.4648	-1.46686	-1.08533	-1.12703	1.38796	1.44607	1.57529	1.59241	1.50048	1.84489	1.81721	1.69064	0.614884	0.532003	0.403163	0.510385	0.594036	0.622668	0.694421	-0.408091	-0.469833	-0.541728	-0.38453	0.124731	-0.00277789	0.00214893
Ckmt1	+	-0.44162	-0.909279	-1.41983	-0.617128	-0.519581	-0.00247233	1.96406	-1.73022	-0.862037	-0.249856	-0.50881	-0.455539	-0.179849	-0.905265	-0.0459247	-0.700536	-0.404038	-0.14477	-0.108894	-1.30254	0.797629	0.843343	0.744653	1.82258	2.00872	1.8698	0.580321	0.0472858	1.32514	-0.0757039	0.640189	-0.851443	-1.05152	-1.94413	-0.604462	0.573149	0.644923	0.245955	1.11702	0.810673
Cks2	+	0.214157	-0.012999	0.537581	0.5451	0.315487	0.300637	0.537926	0.60112	-0.0188166	-0.136118	0.216849	0.321396	-1.80607	-1.92578	0.227025	0.0820524	-0.176599	-1.7813	0.595264	0.600447	0.575131	0.624349	0.467971	0.108308	-1.4468	-1.61418	1.13266	0.965831	0.972118	1.23498	1.24885	0.458016	0.398973	-1.83195	-0.961285	-2.12513	-1.84748	0.883803	0.727189	0.791283
Clasp1	+	-1.05466	-1.31797	-1.39761	-1.14041	-1.08164	-1.33734	-1.02484	-1.39873	-1.70918	-1.08936	-1.26942	-1.55083	0.144325	-0.0332551	-0.709983	-1.3933	0.570943	0.836378	1.02206	0.770483	0.944206	1.11238	0.729895	0.333303	0.41708	0.357792	0.516059	0.52228	0.193727	0.308444	0.52938	0.234192	0.291247	0.950656	0.314155	1.72491	1.06799	1.10246	1.16951	1.34467
Clasp2	+	-0.156957	-0.113995	-0.605008	-0.507964	-0.296404	-0.484473	-0.525429	-0.449052	-0.41713	-0.215476	-0.400359	-0.481404	-1.50502	-1.52615	-2.30139	-2.22945	-1.30099	-1.29141	1.30559	1.09327	0.99573	0.80558	1.00548	0.8173	1.06335	1.03979	1.15295	1.1965	1.11694	1.01734	0.982806	1.0224	1.17411	-0.535631	-0.215162	-0.864005	-0.5134	0.575912	0.255664	0.315565
Clasrp	+	0.919123	0.825914	0.853274	0.267258	-0.151968	0.0277344	0.196528	0.2232	-0.412798	-0.526601	-0.00167126	-0.523129	-1.27299	-0.0353383	-0.776617	-0.351381	-1.77114	-0.785743	0.718996	0.698402	0.204236	0.0331673	0.751314	1.6938	0.791059	1.23104	0.155493	1.05203	-0.263784	0.871873	0.877552	0.461739	1.79072	-1.00286	-0.519538	-3.4323	-1.84761	-0.613842	-0.342646	-0.0124946
Clca3a1	+	0.0385139	0.311232	0.331841	0.101882	0.196474	0.400511	0.355363	0.500313	0.219926	0.368696	0.391791	0.35492	1.18482	1.04432	1.30994	1.2861	1.07063	1.22197	-1.6735	-1.85851	-1.14914	-1.61871	-1.40585	-0.496235	-0.575213	-1.0819	-0.256177	-0.660531	-1.71302	-0.861423	-1.65721	-0.693581	-1.38664	1.13289	1.09201	0.728856	0.903455	0.913233	0.752901	0.875038
Clcc1	+	-0.187882	0.223597	0.259967	0.40923	-0.359053	0.257641	-0.15423	0.201516	-0.319857	-0.441639	-0.0776414	0.313805	1.63636	1.99995	1.55718	1.64383	2.00812	1.78463	-1.29206	-1.03723	-1.2153	-0.906625	-0.881279	-0.687336	-0.459464	-1.07412	-1.10662	-1.83749	-1.48759	-1.14123	-0.657015	0.263121	0.518635	0.750331	0.309427	0.912329	0.9038	-0.149658	-0.183965	-0.296196
Clcn2	+	0.609396	0.860759	0.758813	0.759728	0.773457	1.05611	0.702684	1.09443	1.06917	1.23117	0.824269	1.15849	-0.595908	-1.07935	-0.764169	-0.36728	-0.805079	-0.599077	0.62401	-0.840179	-0.662216	0.413585	-1.24451	-1.32039	-0.758156	0.699428	1.15065	1.28647	1.25135	0.925958	-2.03986	0.0780517	0.891819	-1.71608	-0.594278	-1.73015	-0.703964	-0.397972	-1.12206	-0.879118
Clcn3	+	0.182021	1.42368	-0.159408	0.183468	0.459782	0.199466	-0.0579044	-0.167465	-0.201092	-0.200064	0.447225	0.282549	-0.52834	-1.05811	0.274981	-2.56589	-0.535184	-0.927278	-0.105075	0.294515	0.858057	0.524566	0.855167	1.78891	1.5473	1.36006	-0.66842	-0.926723	0.711711	0.422016	-0.740688	0.977098	1.11211	-1.96037	-0.730782	1.88977	-0.622363	-1.55943	-1.25001	-0.829864
Clcn4	+	0.885575	-0.0404438	1.02562	-0.466512	0.259797	-0.0625741	1.00322	1.68809	1.24078	0.657701	0.733617	0.726129	1.33776	1.25821	1.69245	1.55581	0.202279	0.820219	-0.47333	-0.427139	-0.999747	-0.693852	-0.441656	-0.389324	-0.159796	-1.12838	-1.65424	-1.13348	-1.55728	-0.590689	-1.34428	0.616906	-0.389516	0.639331	-2.33788	0.217282	0.0758952	-1.12589	-0.593168	-0.627513
Clcn5	+	0.985387	1.25602	0.299864	0.831793	1.45586	1.21958	1.21904	1.17728	1.04537	1.21708	0.96092	1.11051	0.995512	1.12731	0.923655	0.436454	1.04527	0.621028	-0.724065	-1.68225	-0.842584	-0.966941	-1.08076	-1.47807	-1.17889	-1.07119	-1.04024	-1.15933	-0.15924	-0.743785	-0.841786	-0.188851	-0.441682	-1.0847	-1.44039	0.377751	-0.277608	-0.306852	-0.756414	-0.840068
Clcn7	+	0.748418	0.453312	1.05046	0.70166	0.3993	0.85201	1.39385	1.28448	1.40105	1.27786	1.02782	1.14712	0.65473	1.1002	0.979635	1.17846	0.194454	0.21426	-0.284764	-0.2869	-0.00265879	0.263077	-0.326059	-0.571353	-0.20106	-0.421937	-1.88857	-2.48101	-2.00829	-1.33463	-1.44745	-0.0244909	-0.149821	-0.662241	-0.792862	-0.674362	-0.43226	-0.623893	-0.969052	-0.738496
Cldn4	+	-0.0540333	0.381467	0.561644	0.866693	1.05742	-0.139852	-0.267121	0.489417	0.412242	-0.820123	-0.337197	-0.505417	-1.85505	-0.170885	-0.0806076	0.0664309	-0.604393	0.899902	-0.74195	-1.0201	0.0178749	-0.357523	-0.715371	1.85499	1.42014	1.88094	-2.63274	-1.952	0.2709	-0.920078	-0.197266	-1.83361	0.573886	0.447748	0.648361	1.41748	0.265728	0.185312	0.811659	0.675091
Cldnd1	+	0.984089	1.00026	0.68227	0.796277	0.112696	0.731912	0.997908	0.792883	1.06668	1.0955	1.16043	0.90405	0.790417	0.904795	0.321723	0.667106	0.750393	-0.0238824	0.0405626	0.233643	0.0105637	0.346803	-0.0537729	0.164136	-0.151093	-0.415044	-2.17123	-2.60773	-0.794008	-1.19201	-2.37516	-0.0794309	-0.157928	0.142691	-0.491133	-0.10201	0.297805	-1.01506	-1.63388	-1.73224
Clic1	+	-0.870144	-0.72128	-1.12987	-1.19627	-1.3776	-1.14356	-0.57738	-1.08605	-0.528917	-0.567968	-0.764174	-0.53628	-0.918069	-1.21007	-1.38258	-1.19118	-0.97928	-0.971834	1.01238	1.07034	0.973933	1.25996	1.21435	1.61286	1.13181	0.719366	0.327142	0.477257	0.132317	0.268542	0.201348	0.608039	0.802947	0.80836	0.293063	-0.482994	-0.234997	1.60806	1.64663	1.70179
Clic4	+	-0.89577	-1.07268	-1.24275	-1.21413	-1.46021	-1.23826	-0.840171	-0.861156	-0.843993	-0.788615	-1.02364	-0.972517	-0.765841	-1.05707	-1.15665	-1.31564	-0.73542	-0.758964	1.06985	1.22959	1.16655	1.15124	1.25679	1.24321	1.12693	1.14082	0.37014	0.347688	0.476129	0.650986	0.781321	0.653703	0.808131	0.541979	0.444139	-0.109181	-0.177265	1.32964	1.35327	1.38783
Clint1	+	-1.41913	-1.41221	-0.769529	-0.839039	-1.42005	-1.3832	-0.654401	-0.657483	-1.13349	-0.839814	-0.974612	-0.945999	-0.749336	-0.593286	-0.648742	-0.558383	0.0620546	0.104225	1.14856	1.28638	1.29042	1.30971	1.32111	1.08933	1.03357	1.22884	-0.225062	-0.385492	-0.252213	0.691082	0.815972	1.10555	1.20007	-0.627427	-1.24522	-0.0927538	0.0730966	1.41148	1.32212	1.33329
Clip1	+	-1.89055	-1.42887	-1.02531	-0.834428	-1.96297	-1.14931	-1.21554	-1.23756	-1.6213	-1.91486	-1.23711	-1.48686	-0.205263	0.566999	0.0423153	0.569581	1.25119	0.943347	0.549488	0.508385	0.452027	0.355573	0.339699	0.164082	0.378444	0.35325	0.559433	0.797432	1.12449	0.943347	0.431484	0.543306	0.423485	0.543857	0.730167	0.796453	1.03769	0.795193	0.916982	1.09223
Clip2	+	-1.32492	-1.37755	-1.30989	-1.38727	-1.82822	-1.52687	-1.109	-1.20047	-0.54501	-0.837819	-0.845209	-0.928726	0.0189982	-0.0137074	0.0471959	-0.00675136	0.711705	1.10444	0.383741	0.20638	0.241616	0.513775	0.387367	0.285259	0.134338	0.121615	-0.243846	-0.598292	-0.291032	-0.512308	-0.217304	0.755063	0.743345	1.01751	1.17692	1.3345	1.37276	1.84124	1.87628	1.83015
Clk3	+	1.59112	1.54538	0.546659	0.904013	0.95425	1.53906	0.651227	0.560154	0.720962	0.875707	0.448554	0.967341	-0.0884252	0.598513	-0.859753	-0.551384	0.860397	-0.904073	1.17385	-0.0049912	-0.233127	-0.519896	-0.840118	0.0644284	-1.384	0.520021	-0.655946	0.0849549	0.587253	0.339199	0.0132394	0.0840855	-0.0656919	-1.1181	-3.20976	-1.64613	-0.980059	-0.747252	-1.46241	-0.359257
Clmp	+	-0.108445	-1.27711	0.240527	1.2687	-2.01491	-1.15315	-1.62905	0.379654	-0.00416924	0.0317551	0.011433	-0.0186186	1.18397	1.33992	1.28562	1.56033	0.00345195	1.18969	0.448099	-1.64071	1.48425	-0.620186	-0.294341	-1.25497	-0.321823	0.518931	-0.188396	-1.1973	-0.0902475	0.0219046	-0.370865	0.550362	-0.763233	-2.37016	0.764357	1.06514	1.05947	0.473386	0.159302	0.277439
Cln3	+	0.746159	0.144699	-1.18139	0.156958	0.555815	0.291451	-0.0791899	0.269121	0.285998	0.141163	-0.726385	-0.152715	-0.508008	0.0720893	-2.57967	-0.776653	0.0606738	-0.736204	1.04759	0.540144	1.32106	0.926553	0.989875	2.14305	1.68995	1.68747	-0.95397	-0.313159	-1.1414	0.135121	0.388378	0.274595	0.272316	-0.311983	-0.0994762	-0.483575	0.820047	-1.21817	-2.38541	-1.31291
Clns1a	+	-0.380961	-0.529174	1.2552	-1.22528	-0.124294	0.016243	-0.296253	-0.440159	-0.969203	-1.05757	-0.300854	-0.481434	-1.77897	-1.42824	0.174173	1.09343	1.12992	-1.34849	1.0146	1.09368	-0.110558	-0.0296477	-0.33152	-0.125314	-0.615463	-0.102793	1.98325	2.01302	2.02848	0.936251	1.10528	-0.364422	-0.428041	-1.20876	-0.901905	-1.09106	-0.671236	0.96602	0.813602	0.718462
Clp1	+	0.168739	0.325076	-0.321928	-0.0421089	-0.886475	-0.192187	0.0755109	0.386809	-0.891611	-0.3396	0.694005	-0.313127	-2.85509	-2.84225	-0.841884	-2.29865	-0.69964	-0.911379	0.784513	0.536996	0.394535	0.362944	0.111747	0.652829	0.600247	1.41457	0.787045	0.912282	1.14564	0.816877	1.11135	0.575557	1.64047	-0.338681	-0.439962	0.738803	0.25046	-0.00338419	-0.375949	0.106909
Clpb	+	0.988364	1.21742	1.36218	1.56134	1.15449	1.09843	1.26298	0.855162	0.808095	0.836112	0.667412	0.53241	-0.403619	-0.317305	-0.701014	-0.519985	-0.204863	-0.661394	0.386945	0.207251	0.389664	0.198513	0.0470794	-0.169237	0.0166275	0.2057	0.00277052	-0.0190873	-0.349068	0.108522	0.00451961	0.694668	0.634335	-1.44579	-1.08143	-1.17883	-1.29909	-2.39125	-2.51784	-1.98117
Clpp	+	1.21316	1.09703	1.20278	1.1079	1.21559	1.15649	1.44409	1.27483	1.0666	1.25258	1.5867	1.43294	-0.722744	-0.44584	-0.315626	-0.174532	-1.09279	-0.854432	0.14626	0.171223	-0.213149	-0.0698347	-0.0924437	-0.380485	-0.23758	-0.338439	-0.00156579	0.0861837	0.0823552	0.10265	0.0920821	-0.0390296	-0.0445596	-1.52542	-1.70125	-1.63471	-1.81795	-1.32738	-1.35293	-1.34875
Clptm1	+	0.60958	0.718044	0.829059	0.851898	0.605564	0.444899	0.519823	0.450147	0.527954	0.422891	0.267558	0.207648	1.08898	0.923168	0.941209	1.02754	1.32237	1.36957	-1.06604	-1.16018	-0.739638	-0.92719	-1.01592	-0.506518	-0.839003	-0.535245	-1.91767	-1.80415	-1.9807	-1.71116	-1.56652	-0.382731	-0.377559	1.0836	0.63943	1.37838	1.02663	-0.279491	-0.418235	-0.0279887
Clptm1l	+	0.539387	0.556811	1.3857	1.41826	0.742308	1.00365	0.551499	0.848811	-0.064886	1.22924	0.562719	0.122593	-0.118274	0.0769947	-0.201979	0.377994	-0.332656	-0.622935	-0.491068	-1.43006	-0.375515	-0.586311	-0.767535	0.261104	0.50135	-0.379349	-2.4264	-1.77436	-2.34858	-1.49597	-1.52472	0.21599	0.52837	1.09581	1.03243	1.13888	1.48471	0.0129579	-0.263216	-0.483768
Clpx	+	1.06015	0.927847	1.34152	1.01604	0.991011	1.13958	0.834157	1.03554	0.398039	0.406422	0.880522	0.668978	-0.231763	0.14469	0.524765	0.19325	0.435977	0.232629	0.0184593	-0.171656	0.0708019	-0.0195109	-0.0132318	0.501496	0.583599	0.474353	-0.678875	-0.597061	-0.88602	-0.288114	-0.521803	0.819109	0.849899	-1.51652	-1.02099	-1.45665	-0.977336	-2.30136	-2.74128	-2.12666
Clstn3	+	0.369698	0.187625	0.171187	0.137551	0.547086	0.792581	1.35717	1.79219	0.980397	1.73744	1.30178	1.80931	0.211425	0.611033	0.277892	0.952928	-1.04928	-0.30131	0.292385	0.285257	-0.455514	-0.412584	-0.500821	-1.57553	-1.05288	-2.26695	0.658071	0.940606	0.594524	-0.418675	-0.248707	-0.440502	-0.741702	-0.781602	-0.753065	-0.875116	0.383833	-1.74387	-1.60831	-1.16554
Clta	+	-0.313193	-0.156061	-0.246485	-0.27087	-0.737318	-0.341803	0.577856	-0.0558697	-0.702705	-0.571243	-0.103004	-0.020519	0.365149	-0.112346	0.643043	0.486919	0.703273	0.202971	0.602604	-0.67707	-0.398643	-0.225498	0.191204	-0.739441	-0.493535	-0.88384	-0.872271	-0.714676	-1.23668	0.195738	0.314665	-0.780597	-1.01589	-0.601509	-0.880588	-0.116651	-0.036033	3.12365	2.76823	3.12904
Cltb	+	0.791806	0.847149	0.77095	0.77521	0.677186	0.687364	1.28825	1.35065	1.09657	1.05728	0.723988	0.840654	-1.10406	-0.661833	-0.957658	-1.05486	-0.818985	-0.598551	0.605697	0.870451	0.433678	0.423943	0.580968	-0.356525	-0.375552	-0.308441	0.345743	0.19064	0.117045	0.549328	0.459284	-0.255318	-0.316908	-3.00047	-1.85771	-2.39734	-1.58846	0.102673	0.0369891	0.0291647
Cltc	+	-0.940613	-1.03385	-0.932973	-1.43107	-0.63699	-1.15717	0.588033	0.579434	-0.019407	0.270464	0.145302	0.154958	0.140394	-0.0675535	0.794973	0.584441	0.744583	0.312564	2.01798	2.11049	1.48283	1.59799	1.44778	-0.293202	-0.168577	-0.0748357	-1.19841	-1.63165	-1.54336	-1.5856	-1.1475	-0.210319	-0.508675	-0.679317	-0.996123	0.907212	0.524558	0.348438	0.848499	0.656287
Cluap1	+	1.07629	0.545607	-0.275005	0.344121	0.38434	0.337123	0.288339	0.230291	-0.264906	-0.30765	0.20543	0.0182725	0.310156	-0.250258	-1.04976	-1.73071	-1.45974	-0.942163	1.09222	1.04339	1.36182	0.962034	1.17092	1.48238	-1.62763	-1.61577	-0.605692	-0.869536	-2.18508	-0.768372	0.799704	1.70831	1.29396	-0.6212	-0.727242	0.345748	1.01405	0.696902	-0.307401	-1.10331
Cluh	+	0.382394	0.430573	0.186499	0.192892	0.455152	0.457346	0.309945	0.254881	0.348612	0.292408	0.371239	0.313542	-1.83756	-1.99233	-2.38522	-2.1749	-1.39871	-1.3755	1.02379	0.998833	0.784656	0.790495	0.78313	0.560921	0.674428	0.625802	0.933727	0.959792	0.923487	0.973247	0.98461	0.816049	0.85498	-1.01397	-1.19641	-1.04148	-0.842774	-0.398212	-0.545006	-0.481363
Clybl	+	0.0796746	0.055898	-0.626161	-0.33196	0.154921	0.327196	0.453655	0.445798	0.537729	0.614525	0.633101	0.56479	1.31336	0.66028	0.872048	0.805863	0.562859	0.636381	-0.173465	-0.354687	-0.706237	-0.918282	-0.846136	-0.876399	-0.553349	-0.694228	-1.28899	-1.7545	-1.32705	-2.71514	-0.951253	0.36318	0.265961	1.91818	1.889	1.18168	1.84938	-0.564391	-0.823777	-0.67945
[truncated: 5,730 more rows]

## Sheet: EMT related proteins
		WT D0							Δ9 D0						WT D3							Δ9 D3						WT D4								Δ9 D4
	Proteins	WT b2_1		WT b2_2		WT b3			Δ9 b2_1		Δ9 b2_2		Δ9 b3		WT b2_1			WT b2_2		WT b3		Δ9 b2_1		Δ9 b2_2		Δ9 b3		WT b2_1		WT b2_2			WT b3			Δ9 b2_1		Δ9 b2_2		Δ9 b3
[truncated: 91 more rows]

## Sheet: EMT protein characterization
Protein	EMTome	MSigDB	Type	References
Anxa8	epithelial	-
Bspry	epithelial	-
Cdh1	epithelial	-
Dsp	epithelial	-
[truncated: 87 more rows]

## Sheet: ECM related proteins
	WT D0							Δ9 D0						WT D3							Δ9 D3						WT D4								Δ9 D4
[truncated: 40 more rows]

[truncated: 2 more sheets: Reprogramming related proteins, R. protein characterization]
