# Supplementary material for: Inactivation of Tumor Suppressor CYLD Inhibits Fibroblast Reprogramming to Pluripotency
Source: Cancers (Basel). 2023 Oct 15;15(20):4997. doi: 10.3390/cancers15204997 (PMC10605754; doi:10.3390/cancers15204997)
Supplement: Supplementary file 1 [file cancers-15-04997-s001.zip › supp_table S3.xlsx]

## Sheet: D3_total
GroupID	Category	Term	Description	LogP	Log(q-value)	Genes	Symbols	InTerm_InList
1_Summary	GO Biological Processes	GO:0055086	nucleobase-containing small molecule metabolic process	-16.272	-12.0606	100,159,1635,2530,2745,3094,3251,3704,4538,4694,4696,4701,4706,4713,4714,4725,4731,4833,5091,5144,5198,5373,5901,6392,7040,7083,9556,10135,10591,10840,10965,11315,22934,23417,55276,79077,83666,84836,93100,160428,2171,2224,3422,3613,5337,8525,8871,10162,10554,23556,51477,54965,57153,84962,1345,1349,1350,4512,4513,4514,11232,51542,131,3658,4017,11277,51167,55753,2583,6483,8703,11041,26229,29071,644…	ADA,ADSS2,DCTD,FUT8,GLRX,HINT1,HPRT1,ITPA,ND4,NDUFA1,NDUFA3,NDUFA7,NDUFAB1,NDUFB7,NDUFB8,NDUFS5,NDUFV3,NME4,PC,PDE4D,PFAS,PMM2,RAN,SDHD,TGFB1,TK1,ATP5MJ,NAMPT,DNPH1,ALDH1L1,ACOT2,PARK7,RPIA,MLYCD,PGM2,DCTPP1,PARP9,ABHD14B,NAPRT,ALDH1L2,FABP5,FDPS,IDI1,IMPA2,PLD1,DGKZ,SYNJ2,LPCAT3,AGPAT1,PIGN,ISYNA1,PIGX,SLC44A2,AJUBA,COX6C,COX7B,COX7C,COX1,COX2,COX3,POLG2,VPS54,ADH7,IREB2,LOXL2,TREX1,CYB5R4,OGDHL…	103/-
1_Member	GO Biological Processes	GO:0055086	nucleobase-containing small molecule metabolic process	-16.272	-12.0606	100,159,1635,2530,2745,3094,3251,3704,4538,4694,4696,4701,4706,4713,4714,4725,4731,4833,5091,5144,5198,5373,5901,6392,7040,7083,9556,10135,10591,10840,10965,11315,22934,23417,55276,79077,83666,84836,93100,160428	ADA,ADSS2,DCTD,FUT8,GLRX,HINT1,HPRT1,ITPA,ND4,NDUFA1,NDUFA3,NDUFA7,NDUFAB1,NDUFB7,NDUFB8,NDUFS5,NDUFV3,NME4,PC,PDE4D,PFAS,PMM2,RAN,SDHD,TGFB1,TK1,ATP5MJ,NAMPT,DNPH1,ALDH1L1,ACOT2,PARK7,RPIA,MLYCD,PGM2,DCTPP1,PARP9,ABHD14B,NAPRT,ALDH1L2	40/555
1_Member	GO Biological Processes	GO:0006753	nucleoside phosphate metabolic process	-15.0216	-11.2751	100,159,1635,3094,3251,3704,4538,4694,4696,4701,4706,4713,4714,4725,4731,4833,5091,5144,5198,5901,6392,7040,7083,9556,10135,10591,10840,10965,11315,22934,23417,79077,83666,84836,93100,160428	ADA,ADSS2,DCTD,HINT1,HPRT1,ITPA,ND4,NDUFA1,NDUFA3,NDUFA7,NDUFAB1,NDUFB7,NDUFB8,NDUFS5,NDUFV3,NME4,PC,PDE4D,PFAS,RAN,SDHD,TGFB1,TK1,ATP5MJ,NAMPT,DNPH1,ALDH1L1,ACOT2,PARK7,RPIA,MLYCD,DCTPP1,PARP9,ABHD14B,NAPRT,ALDH1L2	36/487
1_Member	GO Biological Processes	GO:0009117	nucleotide metabolic process	-14.491	-10.8471	100,159,1635,3094,3251,3704,4538,4694,4696,4701,4706,4713,4714,4725,4731,4833,5091,5144,5198,5901,6392,7040,9556,10135,10591,10840,10965,11315,22934,23417,79077,83666,84836,93100,160428	ADA,ADSS2,DCTD,HINT1,HPRT1,ITPA,ND4,NDUFA1,NDUFA3,NDUFA7,NDUFAB1,NDUFB7,NDUFB8,NDUFS5,NDUFV3,NME4,PC,PDE4D,PFAS,RAN,SDHD,TGFB1,ATP5MJ,NAMPT,DNPH1,ALDH1L1,ACOT2,PARK7,RPIA,MLYCD,DCTPP1,PARP9,ABHD14B,NAPRT,ALDH1L2	35/478
1_Member	GO Biological Processes	GO:0090407	organophosphate biosynthetic process	-14.3603	-10.8471	100,159,1635,2171,2224,3251,3422,3613,4538,4694,4696,4701,4706,4713,4714,4725,4731,4833,5198,5337,6392,7040,7083,8525,8871,9556,10135,10162,10554,23417,23556,51477,54965,57153,83666,84962,93100	ADA,ADSS2,DCTD,FABP5,FDPS,HPRT1,IDI1,IMPA2,ND4,NDUFA1,NDUFA3,NDUFA7,NDUFAB1,NDUFB7,NDUFB8,NDUFS5,NDUFV3,NME4,PFAS,PLD1,SDHD,TGFB1,TK1,DGKZ,SYNJ2,ATP5MJ,NAMPT,LPCAT3,AGPAT1,MLYCD,PIGN,ISYNA1,PIGX,SLC44A2,PARP9,AJUBA,NAPRT	37/541
1_Member	GO Biological Processes	GO:0006163	purine nucleotide metabolic process	-13.7648	-10.3705	100,159,3094,3251,3704,4538,4694,4696,4701,4706,4713,4714,4725,4731,4833,5091,5144,5198,5901,6392,7040,9556,10135,10591,10840,10965,22934,23417,83666,84836,93100,160428	ADA,ADSS2,HINT1,HPRT1,ITPA,ND4,NDUFA1,NDUFA3,NDUFA7,NDUFAB1,NDUFB7,NDUFB8,NDUFS5,NDUFV3,NME4,PC,PDE4D,PFAS,RAN,SDHD,TGFB1,ATP5MJ,NAMPT,DNPH1,ALDH1L1,ACOT2,RPIA,MLYCD,PARP9,ABHD14B,NAPRT,ALDH1L2	32/420
1_Member	GO Biological Processes	GO:0072521	purine-containing compound metabolic process	-13.7069	-10.3583	100,159,3094,3251,3704,4538,4694,4696,4701,4706,4713,4714,4725,4731,4833,5091,5144,5198,5901,6392,7040,9556,10135,10591,10840,10965,22934,23417,55276,83666,84836,93100,160428	ADA,ADSS2,HINT1,HPRT1,ITPA,ND4,NDUFA1,NDUFA3,NDUFA7,NDUFAB1,NDUFB7,NDUFB8,NDUFS5,NDUFV3,NME4,PC,PDE4D,PFAS,RAN,SDHD,TGFB1,ATP5MJ,NAMPT,DNPH1,ALDH1L1,ACOT2,RPIA,MLYCD,PGM2,PARP9,ABHD14B,NAPRT,ALDH1L2	33/450
1_Member	GO Biological Processes	GO:0022904	respiratory electron transport chain	-13.1226	-9.82269	1345,1349,1350,4512,4513,4514,4538,4694,4696,4701,4706,4713,4714,4725,4731,6392,11232,51542	COX6C,COX7B,COX7C,COX1,COX2,COX3,ND4,NDUFA1,NDUFA3,NDUFA7,NDUFAB1,NDUFB7,NDUFB8,NDUFS5,NDUFV3,SDHD,POLG2,VPS54	18/117
1_Member	GO Biological Processes	GO:0019646	aerobic electron transport chain	-12.8246	-9.58998	1345,1349,1350,4512,4513,4514,4538,4694,4696,4701,4706,4713,4714,4725,4731,6392	COX6C,COX7B,COX7C,COX1,COX2,COX3,ND4,NDUFA1,NDUFA3,NDUFA7,NDUFAB1,NDUFB7,NDUFB8,NDUFS5,NDUFV3,SDHD	16/89
1_Member	GO Biological Processes	GO:0042773	ATP synthesis coupled electron transport	-12.4378	-9.26534	1345,1349,1350,4512,4513,4514,4538,4694,4696,4701,4706,4713,4714,4725,4731,6392	COX6C,COX7B,COX7C,COX1,COX2,COX3,ND4,NDUFA1,NDUFA3,NDUFA7,NDUFAB1,NDUFB7,NDUFB8,NDUFS5,NDUFV3,SDHD	16/94
1_Member	GO Biological Processes	GO:0042775	mitochondrial ATP synthesis coupled electron transport	-12.4378	-9.26534	1345,1349,1350,4512,4513,4514,4538,4694,4696,4701,4706,4713,4714,4725,4731,6392	COX6C,COX7B,COX7C,COX1,COX2,COX3,ND4,NDUFA1,NDUFA3,NDUFA7,NDUFAB1,NDUFB7,NDUFB8,NDUFS5,NDUFV3,SDHD	16/94
1_Member	GO Biological Processes	GO:0006091	generation of precursor metabolites and energy	-11.9792	-8.88587	131,1345,1349,1350,3658,4017,4512,4513,4514,4538,4694,4696,4701,4706,4713,4714,4725,4731,6392,10840,11232,11277,22934,51167,51542,55276,55753,160428	ADH7,COX6C,COX7B,COX7C,IREB2,LOXL2,COX1,COX2,COX3,ND4,NDUFA1,NDUFA3,NDUFA7,NDUFAB1,NDUFB7,NDUFB8,NDUFS5,NDUFV3,SDHD,ALDH1L1,POLG2,TREX1,RPIA,CYB5R4,VPS54,PGM2,OGDHL,ALDH1L2	28/372
1_Member	Reactome Gene Sets	R-HSA-611105	Respiratory electron transport	-11.799	-8.75147	1345,1349,1350,4512,4513,4514,4538,4694,4696,4701,4706,4713,4714,4725,4731,6392	COX6C,COX7B,COX7C,COX1,COX2,COX3,ND4,NDUFA1,NDUFA3,NDUFA7,NDUFAB1,NDUFB7,NDUFB8,NDUFS5,NDUFV3,SDHD	16/103
1_Member	WikiPathways	WP111	Electron transport chain: OXPHOS system in mitochondria	-11.799	-8.75147	1345,1349,1350,4512,4513,4514,4538,4694,4696,4701,4706,4713,4714,4725,4731,6392	COX6C,COX7B,COX7C,COX1,COX2,COX3,ND4,NDUFA1,NDUFA3,NDUFA7,NDUFAB1,NDUFB7,NDUFB8,NDUFS5,NDUFV3,SDHD	16/103
1_Member	GO Biological Processes	GO:1901137	carbohydrate derivative biosynthetic process	-11.7308	-8.70446	100,159,2530,2583,3251,4538,4694,4696,4701,4706,4713,4714,4725,4731,4833,5198,5373,6392,6483,7040,7083,8703,9556,11041,11277,23417,23556,26229,29071,54965,55276,64409,91869,140838,200185	ADA,ADSS2,FUT8,B4GALNT1,HPRT1,ND4,NDUFA1,NDUFA3,NDUFA7,NDUFAB1,NDUFB7,NDUFB8,NDUFS5,NDUFV3,NME4,PFAS,PMM2,SDHD,ST3GAL2,TGFB1,TK1,B4GALT3,ATP5MJ,B4GAT1,TREX1,MLYCD,PIGN,B3GAT3,C1GALT1C1,PIGX,PGM2,GALNT17,RFT1,NANP,KRTCAP2	35/594
1_Member	GO Biological Processes	GO:0072522	purine-containing compound biosynthetic process	-11.2727	-8.27733	100,159,3251,4538,4694,4696,4701,4706,4713,4714,4725,4731,4833,5198,6392,7040,9556,10135,23417,55276,83666,93100	ADA,ADSS2,HPRT1,ND4,NDUFA1,NDUFA3,NDUFA7,NDUFAB1,NDUFB7,NDUFB8,NDUFS5,NDUFV3,NME4,PFAS,SDHD,TGFB1,ATP5MJ,NAMPT,MLYCD,PGM2,PARP9,NAPRT	22/238
1_Member	GO Biological Processes	GO:0022900	electron transport chain	-11.2642	-8.27733	1345,1349,1350,4017,4512,4513,4514,4538,4694,4696,4701,4706,4713,4714,4725,4731,6392,11232,51542	COX6C,COX7B,COX7C,LOXL2,COX1,COX2,COX3,ND4,NDUFA1,NDUFA3,NDUFA7,NDUFAB1,NDUFB7,NDUFB8,NDUFS5,NDUFV3,SDHD,POLG2,VPS54	19/170
1_Member	GO Biological Processes	GO:1901293	nucleoside phosphate biosynthetic process	-11.1921	-8.22374	100,159,1635,3251,4538,4694,4696,4701,4706,4713,4714,4725,4731,4833,5198,6392,7040,7083,9556,10135,23417,83666,93100	ADA,ADSS2,DCTD,HPRT1,ND4,NDUFA1,NDUFA3,NDUFA7,NDUFAB1,NDUFB7,NDUFB8,NDUFS5,NDUFV3,NME4,PFAS,SDHD,TGFB1,TK1,ATP5MJ,NAMPT,MLYCD,PARP9,NAPRT	23/265
1_Member	GO Biological Processes	GO:0045333	cellular respiration	-11.129	-8.17842	1345,1349,1350,3658,4512,4513,4514,4538,4694,4696,4701,4706,4713,4714,4725,4731,6392,11232,51542,55753	COX6C,COX7B,COX7C,IREB2,COX1,COX2,COX3,ND4,NDUFA1,NDUFA3,NDUFA7,NDUFAB1,NDUFB7,NDUFB8,NDUFS5,NDUFV3,SDHD,POLG2,VPS54,OGDHL	20/195
1_Member	KEGG Pathway	hsa05415	Diabetic cardiomyopathy	-10.8072	-7.87365	489,1345,1349,1350,2597,4512,4513,4514,4538,4694,4696,4701,4706,4713,4714,4725,4731,5524,6392,7040	ATP2A3,COX6C,COX7B,COX7C,GAPDH,COX1,COX2,COX3,ND4,NDUFA1,NDUFA3,NDUFA7,NDUFAB1,NDUFB7,NDUFB8,NDUFS5,NDUFV3,PTPA,SDHD,TGFB1	20/203
1_Member	GO Biological Processes	GO:0006164	purine nucleotide biosynthetic process	-10.7216	-7.80438	100,159,3251,4538,4694,4696,4701,4706,4713,4714,4725,4731,4833,5198,6392,7040,9556,10135,23417,83666,93100	ADA,ADSS2,HPRT1,ND4,NDUFA1,NDUFA3,NDUFA7,NDUFAB1,NDUFB7,NDUFB8,NDUFS5,NDUFV3,NME4,PFAS,SDHD,TGFB1,ATP5MJ,NAMPT,MLYCD,PARP9,NAPRT	21/229
1_Member	GO Biological Processes	GO:0006119	oxidative phosphorylation	-10.6982	-7.79684	1345,1349,1350,4512,4513,4514,4538,4694,4696,4701,4706,4713,4714,4725,4731,6392	COX6C,COX7B,COX7C,COX1,COX2,COX3,ND4,NDUFA1,NDUFA3,NDUFA7,NDUFAB1,NDUFB7,NDUFB8,NDUFS5,NDUFV3,SDHD	16/121
1_Member	GO Biological Processes	GO:0009060	aerobic respiration	-10.6151	-7.72893	1345,1349,1350,3658,4512,4513,4514,4538,4694,4696,4701,4706,4713,4714,4725,4731,6392,55753	COX6C,COX7B,COX7C,IREB2,COX1,COX2,COX3,ND4,NDUFA1,NDUFA3,NDUFA7,NDUFAB1,NDUFB7,NDUFB8,NDUFS5,NDUFV3,SDHD,OGDHL	18/163
1_Member	GO Biological Processes	GO:0009165	nucleotide biosynthetic process	-10.4175	-7.56026	100,159,1635,3251,4538,4694,4696,4701,4706,4713,4714,4725,4731,4833,5198,6392,7040,9556,10135,23417,83666,93100	ADA,ADSS2,DCTD,HPRT1,ND4,NDUFA1,NDUFA3,NDUFA7,NDUFAB1,NDUFB7,NDUFB8,NDUFS5,NDUFV3,NME4,PFAS,SDHD,TGFB1,ATP5MJ,NAMPT,MLYCD,PARP9,NAPRT	22/263
1_Member	Reactome Gene Sets	R-HSA-163200	Respiratory electron transport, ATP synthesis by chemiosmotic coupling, and heat production by uncoupling proteins.	-10.3735	-7.53014	1345,1349,1350,4512,4513,4514,4538,4694,4696,4701,4706,4713,4714,4725,4731,6392	COX6C,COX7B,COX7C,COX1,COX2,COX3,ND4,NDUFA1,NDUFA3,NDUFA7,NDUFAB1,NDUFB7,NDUFB8,NDUFS5,NDUFV3,SDHD	16/127
1_Member	KEGG Pathway	hsa05208	Chemical carcinogenesis - reactive oxygen species	-10.0654	-7.23534	1345,1349,1350,2941,3162,4512,4513,4514,4538,4694,4696,4701,4706,4713,4714,4725,4731,5337,6392,6647	COX6C,COX7B,COX7C,GSTA4,HMOX1,COX1,COX2,COX3,ND4,NDUFA1,NDUFA3,NDUFA7,NDUFAB1,NDUFB7,NDUFB8,NDUFS5,NDUFV3,PLD1,SDHD,SOD1	20/223
1_Member	KEGG Pathway	hsa00190	Oxidative phosphorylation	-10.0169	-7.21982	1345,1349,1350,4512,4513,4514,4538,4694,4696,4701,4706,4713,4714,4725,4731,6392	COX6C,COX7B,COX7C,COX1,COX2,COX3,ND4,NDUFA1,NDUFA3,NDUFA7,NDUFAB1,NDUFB7,NDUFB8,NDUFS5,NDUFV3,SDHD	16/134
1_Member	WikiPathways	WP4396	Nonalcoholic fatty liver disease	-10.0121	-7.21982	1345,1349,1350,4512,4513,4514,4694,4696,4701,4706,4713,4714,4725,4731,6392,7040,7186	COX6C,COX7B,COX7C,COX1,COX2,COX3,NDUFA1,NDUFA3,NDUFA7,NDUFAB1,NDUFB7,NDUFB8,NDUFS5,NDUFV3,SDHD,TGFB1,TRAF2	17/155
1_Member	KEGG Pathway	hsa04932	Non-alcoholic fatty liver disease	-10.0121	-7.21982	1345,1349,1350,4512,4513,4514,4694,4696,4701,4706,4713,4714,4725,4731,6392,7040,7186	COX6C,COX7B,COX7C,COX1,COX2,COX3,NDUFA1,NDUFA3,NDUFA7,NDUFAB1,NDUFB7,NDUFB8,NDUFS5,NDUFV3,SDHD,TGFB1,TRAF2	17/155
1_Member	GO Biological Processes	GO:0019693	ribose phosphate metabolic process	-9.78	-6.99965	100,159,3094,3251,3704,4538,4694,4696,4701,4706,4713,4714,4725,4731,4833,5144,5198,5901,6392,7040,9556,10965,22934,23417,84836	ADA,ADSS2,HINT1,HPRT1,ITPA,ND4,NDUFA1,NDUFA3,NDUFA7,NDUFAB1,NDUFB7,NDUFB8,NDUFS5,NDUFV3,NME4,PDE4D,PFAS,RAN,SDHD,TGFB1,ATP5MJ,ACOT2,RPIA,MLYCD,ABHD14B	25/369
1_Member	KEGG Pathway	hsa04714	Thermogenesis	-9.75742	-6.99015	1345,1349,1350,4512,4513,4514,4538,4694,4696,4701,4706,4713,4714,4725,4731,5593,6392,6604,28958,493753	COX6C,COX7B,COX7C,COX1,COX2,COX3,ND4,NDUFA1,NDUFA3,NDUFA7,NDUFAB1,NDUFB7,NDUFB8,NDUFS5,NDUFV3,PRKG2,SDHD,SMARCD3,COA3,COA5	20/232
1_Member	GO Biological Processes	GO:0009150	purine ribonucleotide metabolic process	-9.74765	-6.99015	100,159,3094,3251,3704,4538,4694,4696,4701,4706,4713,4714,4725,4731,4833,5144,5198,5901,6392,7040,9556,10965,23417,84836	ADA,ADSS2,HINT1,HPRT1,ITPA,ND4,NDUFA1,NDUFA3,NDUFA7,NDUFAB1,NDUFB7,NDUFB8,NDUFS5,NDUFV3,NME4,PDE4D,PFAS,RAN,SDHD,TGFB1,ATP5MJ,ACOT2,MLYCD,ABHD14B	24/341
1_Member	GO Biological Processes	GO:0015980	energy derivation by oxidation of organic compounds	-9.56664	-6.82014	1345,1349,1350,3658,4512,4513,4514,4538,4694,4696,4701,4706,4713,4714,4725,4731,6392,11232,51542,55276,55753	COX6C,COX7B,COX7C,IREB2,COX1,COX2,COX3,ND4,NDUFA1,NDUFA3,NDUFA7,NDUFAB1,NDUFB7,NDUFB8,NDUFS5,NDUFV3,SDHD,POLG2,VPS54,PGM2,OGDHL	21/264
1_Member	KEGG Pathway	hsa05012	Parkinson disease	-9.50639	-6.77453	1345,1349,1350,4512,4513,4514,4538,4694,4696,4701,4706,4713,4714,4725,4731,6392,6647,7326,7332,7345,11315	COX6C,COX7B,COX7C,COX1,COX2,COX3,ND4,NDUFA1,NDUFA3,NDUFA7,NDUFAB1,NDUFB7,NDUFB8,NDUFS5,NDUFV3,SDHD,SOD1,UBE2G1,UBE2L3,UCHL1,PARK7	21/266
1_Member	GO Biological Processes	GO:0009141	nucleoside triphosphate metabolic process	-9.49984	-6.77453	100,3704,4538,4694,4696,4701,4706,4713,4714,4725,4731,4833,5901,6392,7040,9556,79077	ADA,ITPA,ND4,NDUFA1,NDUFA3,NDUFA7,NDUFAB1,NDUFB7,NDUFB8,NDUFS5,NDUFV3,NME4,RAN,SDHD,TGFB1,ATP5MJ,DCTPP1	17/167
1_Member	GO Biological Processes	GO:0009144	purine nucleoside triphosphate metabolic process	-9.36553	-6.65431	100,3704,4538,4694,4696,4701,4706,4713,4714,4725,4731,4833,5901,6392,7040,9556	ADA,ITPA,ND4,NDUFA1,NDUFA3,NDUFA7,NDUFAB1,NDUFB7,NDUFB8,NDUFS5,NDUFV3,NME4,RAN,SDHD,TGFB1,ATP5MJ	16/148
1_Member	GO Biological Processes	GO:0009152	purine ribonucleotide biosynthetic process	-9.35942	-6.65431	100,159,3251,4538,4694,4696,4701,4706,4713,4714,4725,4731,4833,5198,6392,7040,9556,23417	ADA,ADSS2,HPRT1,ND4,NDUFA1,NDUFA3,NDUFA7,NDUFAB1,NDUFB7,NDUFB8,NDUFS5,NDUFV3,NME4,PFAS,SDHD,TGFB1,ATP5MJ,MLYCD	18/194
1_Member	GO Biological Processes	GO:0009259	ribonucleotide metabolic process	-9.27068	-6.57534	100,159,3094,3251,3704,4538,4694,4696,4701,4706,4713,4714,4725,4731,4833,5144,5198,5901,6392,7040,9556,10965,23417,84836	ADA,ADSS2,HINT1,HPRT1,ITPA,ND4,NDUFA1,NDUFA3,NDUFA7,NDUFAB1,NDUFB7,NDUFB8,NDUFS5,NDUFV3,NME4,PDE4D,PFAS,RAN,SDHD,TGFB1,ATP5MJ,ACOT2,MLYCD,ABHD14B	24/360
1_Member	GO Biological Processes	GO:0009206	purine ribonucleoside triphosphate biosynthetic process	-8.88052	-6.19472	4538,4694,4696,4701,4706,4713,4714,4725,4731,4833,6392,7040,9556	ND4,NDUFA1,NDUFA3,NDUFA7,NDUFAB1,NDUFB7,NDUFB8,NDUFS5,NDUFV3,NME4,SDHD,TGFB1,ATP5MJ	13/97
1_Member	GO Biological Processes	GO:0009260	ribonucleotide biosynthetic process	-8.86929	-6.19283	100,159,3251,4538,4694,4696,4701,4706,4713,4714,4725,4731,4833,5198,6392,7040,9556,23417	ADA,ADSS2,HPRT1,ND4,NDUFA1,NDUFA3,NDUFA7,NDUFAB1,NDUFB7,NDUFB8,NDUFS5,NDUFV3,NME4,PFAS,SDHD,TGFB1,ATP5MJ,MLYCD	18/208
1_Member	GO Biological Processes	GO:0009145	purine nucleoside triphosphate biosynthetic process	-8.82431	-6.15699	4538,4694,4696,4701,4706,4713,4714,4725,4731,4833,6392,7040,9556	ND4,NDUFA1,NDUFA3,NDUFA7,NDUFAB1,NDUFB7,NDUFB8,NDUFS5,NDUFV3,NME4,SDHD,TGFB1,ATP5MJ	13/98
1_Member	GO Biological Processes	GO:0046390	ribose phosphate biosynthetic process	-8.63906	-5.98806	100,159,3251,4538,4694,4696,4701,4706,4713,4714,4725,4731,4833,5198,6392,7040,9556,23417	ADA,ADSS2,HPRT1,ND4,NDUFA1,NDUFA3,NDUFA7,NDUFAB1,NDUFB7,NDUFB8,NDUFS5,NDUFV3,NME4,PFAS,SDHD,TGFB1,ATP5MJ,MLYCD	18/215
1_Member	GO Biological Processes	GO:0009205	purine ribonucleoside triphosphate metabolic process	-8.63541	-5.98806	3704,4538,4694,4696,4701,4706,4713,4714,4725,4731,4833,5901,6392,7040,9556	ITPA,ND4,NDUFA1,NDUFA3,NDUFA7,NDUFAB1,NDUFB7,NDUFB8,NDUFS5,NDUFV3,NME4,RAN,SDHD,TGFB1,ATP5MJ	15/143
1_Member	GO Biological Processes	GO:0009201	ribonucleoside triphosphate biosynthetic process	-8.55301	-5.92045	4538,4694,4696,4701,4706,4713,4714,4725,4731,4833,6392,7040,9556	ND4,NDUFA1,NDUFA3,NDUFA7,NDUFAB1,NDUFB7,NDUFB8,NDUFS5,NDUFV3,NME4,SDHD,TGFB1,ATP5MJ	13/103
1_Member	GO Biological Processes	GO:0006754	ATP biosynthetic process	-8.44873	-5.83257	4538,4694,4696,4701,4706,4713,4714,4725,4731,6392,7040,9556	ND4,NDUFA1,NDUFA3,NDUFA7,NDUFAB1,NDUFB7,NDUFB8,NDUFS5,NDUFV3,SDHD,TGFB1,ATP5MJ	12/86
1_Member	GO Biological Processes	GO:0009199	ribonucleoside triphosphate metabolic process	-8.34748	-5.76977	3704,4538,4694,4696,4701,4706,4713,4714,4725,4731,4833,5901,6392,7040,9556	ITPA,ND4,NDUFA1,NDUFA3,NDUFA7,NDUFAB1,NDUFB7,NDUFB8,NDUFS5,NDUFV3,NME4,RAN,SDHD,TGFB1,ATP5MJ	15/150
1_Member	Reactome Gene Sets	R-HSA-1428517	The citric acid (TCA) cycle and respiratory electron transport	-8.18852	-5.63235	1345,1349,1350,4512,4513,4514,4538,4694,4696,4701,4706,4713,4714,4725,4731,6392	COX6C,COX7B,COX7C,COX1,COX2,COX3,ND4,NDUFA1,NDUFA3,NDUFA7,NDUFAB1,NDUFB7,NDUFB8,NDUFS5,NDUFV3,SDHD	16/178
1_Member	GO Biological Processes	GO:0015986	proton motive force-driven ATP synthesis	-8.15603	-5.60692	4538,4694,4696,4701,4706,4713,4714,4725,4731,6392,9556	ND4,NDUFA1,NDUFA3,NDUFA7,NDUFAB1,NDUFB7,NDUFB8,NDUFS5,NDUFV3,SDHD,ATP5MJ	11/73
1_Member	GO Biological Processes	GO:0009142	nucleoside triphosphate biosynthetic process	-8.00721	-5.49116	4538,4694,4696,4701,4706,4713,4714,4725,4731,4833,6392,7040,9556	ND4,NDUFA1,NDUFA3,NDUFA7,NDUFAB1,NDUFB7,NDUFB8,NDUFS5,NDUFV3,NME4,SDHD,TGFB1,ATP5MJ	13/114
1_Member	GO Biological Processes	GO:0006120	mitochondrial electron transport, NADH to ubiquinone	-7.81214	-5.31484	4538,4694,4696,4701,4706,4713,4714,4725,4731	ND4,NDUFA1,NDUFA3,NDUFA7,NDUFAB1,NDUFB7,NDUFB8,NDUFS5,NDUFV3	9/46
1_Member	GO Biological Processes	GO:0042776	proton motive force-driven mitochondrial ATP synthesis	-7.62445	-5.14512	4538,4694,4696,4701,4706,4713,4714,4725,4731,6392	ND4,NDUFA1,NDUFA3,NDUFA7,NDUFAB1,NDUFB7,NDUFB8,NDUFS5,NDUFV3,SDHD	10/64
1_Member	KEGG Pathway	hsa05022	Pathways of neurodegeneration - multiple diseases	-7.53896	-5.06546	489,1345,1349,1350,4287,4512,4513,4514,4538,4694,4696,4701,4706,4713,4714,4725,4731,5621,6392,6647,7186,7326,7332,7345,11315	ATP2A3,COX6C,COX7B,COX7C,ATXN3,COX1,COX2,COX3,ND4,NDUFA1,NDUFA3,NDUFA7,NDUFAB1,NDUFB7,NDUFB8,NDUFS5,NDUFV3,PRNP,SDHD,SOD1,TRAF2,UBE2G1,UBE2L3,UCHL1,PARK7	25/476
1_Member	KEGG Pathway	hsa05020	Prion disease	-7.03035	-4.59996	1345,1349,1350,4512,4513,4514,4538,4694,4696,4701,4706,4713,4714,4725,4731,5621,6392,6647	COX6C,COX7B,COX7C,COX1,COX2,COX3,ND4,NDUFA1,NDUFA3,NDUFA7,NDUFAB1,NDUFB7,NDUFB8,NDUFS5,NDUFV3,PRNP,SDHD,SOD1	18/273
1_Member	WikiPathways	WP4324	Mitochondrial complex I assembly model OXPHOS system	-7.02944	-4.59996	4538,4694,4696,4701,4706,4713,4714,4725,4731	ND4,NDUFA1,NDUFA3,NDUFA7,NDUFAB1,NDUFB7,NDUFB8,NDUFS5,NDUFV3	9/56
1_Member	KEGG Pathway	hsa05016	Huntington disease	-6.97682	-4.55768	1345,1349,1350,4512,4513,4514,4538,4694,4696,4701,4706,4713,4714,4725,4731,6392,6647,6908,7186	COX6C,COX7B,COX7C,COX1,COX2,COX3,ND4,NDUFA1,NDUFA3,NDUFA7,NDUFAB1,NDUFB7,NDUFB8,NDUFS5,NDUFV3,SDHD,SOD1,TBP,TRAF2	19/306
1_Member	Reactome Gene Sets	R-HSA-6799198	Complex I biogenesis	-6.96026	-4.54621	4538,4694,4696,4701,4706,4713,4714,4725,4731	ND4,NDUFA1,NDUFA3,NDUFA7,NDUFAB1,NDUFB7,NDUFB8,NDUFS5,NDUFV3	9/57
1_Member	GO Biological Processes	GO:0046034	ATP metabolic process	-6.8802	-4.47612	4538,4694,4696,4701,4706,4713,4714,4725,4731,6392,7040,9556	ND4,NDUFA1,NDUFA3,NDUFA7,NDUFAB1,NDUFB7,NDUFB8,NDUFS5,NDUFV3,SDHD,TGFB1,ATP5MJ	12/118
1_Member	CORUM	CORUM:178	Respiratory chain complex I (holoenzyme), mitochondrial	-6.74392	-4.3496	4694,4696,4701,4706,4713,4714,4725,4731	NDUFA1,NDUFA3,NDUFA7,NDUFAB1,NDUFB7,NDUFB8,NDUFS5,NDUFV3	8/44
1_Member	KEGG Pathway	hsa05010	Alzheimer disease	-6.09248	-3.80462	489,1345,1349,1350,2597,4023,4512,4513,4514,4538,4694,4696,4701,4706,4713,4714,4725,4731,6392,7186	ATP2A3,COX6C,COX7B,COX7C,GAPDH,LPL,COX1,COX2,COX3,ND4,NDUFA1,NDUFA3,NDUFA7,NDUFAB1,NDUFB7,NDUFB8,NDUFS5,NDUFV3,SDHD,TRAF2	20/384
1_Member	WikiPathways	WP623	Oxidative phosphorylation	-5.67089	-3.42955	4538,4696,4701,4706,4713,4714,4725,4731	ND4,NDUFA3,NDUFA7,NDUFAB1,NDUFB7,NDUFB8,NDUFS5,NDUFV3	8/60
1_Member	KEGG Pathway	hsa05014	Amyotrophic lateral sclerosis	-5.23103	-3.05565	1345,1349,1350,4512,4513,4514,4538,4694,4696,4701,4706,4713,4714,4725,4731,6392,6647,7186	COX6C,COX7B,COX7C,COX1,COX2,COX3,ND4,NDUFA1,NDUFA3,NDUFA7,NDUFAB1,NDUFB7,NDUFB8,NDUFS5,NDUFV3,SDHD,SOD1,TRAF2	18/364
1_Member	GO Biological Processes	GO:0033108	mitochondrial respiratory chain complex assembly	-4.83427	-2.72376	4538,4694,4696,4706,4713,4714,4725,28958,493753	ND4,NDUFA1,NDUFA3,NDUFAB1,NDUFB7,NDUFB8,NDUFS5,COA3,COA5	9/101
1_Member	GO Biological Processes	GO:0010257	NADH dehydrogenase complex assembly	-4.64014	-2.56342	4538,4694,4696,4706,4713,4714,4725	ND4,NDUFA1,NDUFA3,NDUFAB1,NDUFB7,NDUFB8,NDUFS5	7/60
1_Member	GO Biological Processes	GO:0032981	mitochondrial respiratory chain complex I assembly	-4.64014	-2.56342	4538,4694,4696,4706,4713,4714,4725	ND4,NDUFA1,NDUFA3,NDUFAB1,NDUFB7,NDUFB8,NDUFS5	7/60
1_Member	GO Biological Processes	GO:0007005	mitochondrion organization	-4.51301	-2.47408	2810,4205,4538,4694,4696,4706,4713,4714,4725,8936,11232,11315,25793,28958,51542,51566,64422,79017,493753	SFN,MEF2A,ND4,NDUFA1,NDUFA3,NDUFAB1,NDUFB7,NDUFB8,NDUFS5,WASF1,POLG2,PARK7,FBXO7,COA3,VPS54,ARMCX3,ATG3,GGCT,COA5	19/451
1_Member	CORUM	CORUM:2914	Respiratory chain complex I (beta subunit) mitochondrial	-4.18961	-2.25932	4538,4706,4713,4714	ND4,NDUFAB1,NDUFB7,NDUFB8	4/16
1_Member	KEGG Pathway	hsa04723	Retrograde endocannabinoid signaling	-3.54379	-1.76226	4538,4694,4696,4701,4706,4713,4714,4725,4731	ND4,NDUFA1,NDUFA3,NDUFA7,NDUFAB1,NDUFB7,NDUFB8,NDUFS5,NDUFV3	9/148
2_Summary	Reactome Gene Sets	R-HSA-1474244	Extracellular matrix organization	-16.1082	-12.0606	649,960,999,1295,1307,2192,2199,2200,2201,2335,3339,3371,4017,4052,4053,4237,4811,5054,5340,5654,6383,7040,7057,7092,11117,26577,30008,80781,84034,84171,1490,3490,4240,6586,7045,8840,64129,255743	BMP1,CD44,CDH1,COL8A1,COL16A1,FBLN1,FBLN2,FBN1,FBN2,FN1,HSPG2,TNC,LOXL2,LTBP1,LTBP2,MFAP2,NID1,SERPINE1,PLG,HTRA1,SDC2,TGFB1,THBS1,TLL1,EMILIN1,PCOLCE2,EFEMP2,COL18A1,EMILIN2,LOXL4,CCN2,IGFBP7,MFGE8,SLIT3,TGFBI,CCN4,TINAGL1,NPNT	38/-
2_Member	Reactome Gene Sets	R-HSA-1474244	Extracellular matrix organization	-16.1082	-12.0606	649,960,999,1295,1307,2192,2199,2200,2201,2335,3339,3371,4017,4052,4053,4237,4811,5054,5340,5654,6383,7040,7057,7092,11117,26577,30008,80781,84034,84171	BMP1,CD44,CDH1,COL8A1,COL16A1,FBLN1,FBLN2,FBN1,FBN2,FN1,HSPG2,TNC,LOXL2,LTBP1,LTBP2,MFAP2,NID1,SERPINE1,PLG,HTRA1,SDC2,TGFB1,THBS1,TLL1,EMILIN1,PCOLCE2,EFEMP2,COL18A1,EMILIN2,LOXL4	30/300
2_Member	Reactome Gene Sets	R-HSA-1566948	Elastic fibre formation	-15.0459	-11.2751	2192,2199,2200,2201,2335,4017,4052,4053,4237,7040,11117,30008,84034,84171	FBLN1,FBLN2,FBN1,FBN2,FN1,LOXL2,LTBP1,LTBP2,MFAP2,TGFB1,EMILIN1,EFEMP2,EMILIN2,LOXL4	14/44
2_Member	Canonical Pathways	M5884	NABA CORE MATRISOME	-14.3506	-10.8471	1295,1307,1490,2192,2199,2200,2201,2335,3339,3371,3490,4052,4053,4237,4240,4811,6586,7045,7057,8840,11117,26577,30008,64129,80781,84034,255743	COL8A1,COL16A1,CCN2,FBLN1,FBLN2,FBN1,FBN2,FN1,HSPG2,TNC,IGFBP7,LTBP1,LTBP2,MFAP2,MFGE8,NID1,SLIT3,TGFBI,THBS1,CCN4,EMILIN1,PCOLCE2,EFEMP2,TINAGL1,COL18A1,EMILIN2,NPNT	27/275
2_Member	Canonical Pathways	M3008	NABA ECM GLYCOPROTEINS	-13.9706	-10.5251	1490,2192,2199,2200,2201,2335,3371,3490,4052,4053,4237,4240,4811,6586,7045,7057,8840,11117,26577,30008,64129,84034,255743	CCN2,FBLN1,FBLN2,FBN1,FBN2,FN1,TNC,IGFBP7,LTBP1,LTBP2,MFAP2,MFGE8,NID1,SLIT3,TGFBI,THBS1,CCN4,EMILIN1,PCOLCE2,EFEMP2,TINAGL1,EMILIN2,NPNT	23/196
2_Member	Reactome Gene Sets	R-HSA-2129379	Molecules associated with elastic fibres	-13.0921	-9.82269	2192,2199,2200,2201,2335,4052,4053,4237,7040,11117,30008,84034	FBLN1,FBLN2,FBN1,FBN2,FN1,LTBP1,LTBP2,MFAP2,TGFB1,EMILIN1,EFEMP2,EMILIN2	12/37
3_Summary	Reactome Gene Sets	R-HSA-114608	Platelet degranulation	-12.3687	-9.22426	197,213,350,2153,2162,2335,3920,3959,5054,5340,5341,5478,5627,6647,7040,7057,7114,51571,2147,7534,8525,10630,958,960,1490,2152,2192,3162,3371,7070,8829,29071,84962,646960,653145,100,4513,11117,84034,489,2817,4282,5593,6383,7102	AHSG,ALB,APOH,F5,F13A1,FN1,LAMP2,LGALS3BP,SERPINE1,PLG,PLEK,PPIA,PROS1,SOD1,TGFB1,THBS1,TMSB4X,CYRIB,F2,YWHAZ,DGKZ,PDPN,CD40,CD44,CCN2,F3,FBLN1,HMOX1,TNC,THY1,NRP1,C1GALT1C1,AJUBA,PRSS56,ANXA8,ADA,COX2,EMILIN1,EMILIN2,ATP2A3,GPC1,MIF,PRKG2,SDC2,TSPAN7	45/-
3_Member	Reactome Gene Sets	R-HSA-114608	Platelet degranulation	-12.3687	-9.22426	197,213,350,2153,2162,2335,3920,3959,5054,5340,5341,5478,5627,6647,7040,7057,7114,51571	AHSG,ALB,APOH,F5,F13A1,FN1,LAMP2,LGALS3BP,SERPINE1,PLG,PLEK,PPIA,PROS1,SOD1,TGFB1,THBS1,TMSB4X,CYRIB	18/129
3_Member	Reactome Gene Sets	R-HSA-76005	Response to elevated platelet cytosolic Ca2+	-12.0786	-8.96047	197,213,350,2153,2162,2335,3920,3959,5054,5340,5341,5478,5627,6647,7040,7057,7114,51571	AHSG,ALB,APOH,F5,F13A1,FN1,LAMP2,LGALS3BP,SERPINE1,PLG,PLEK,PPIA,PROS1,SOD1,TGFB1,THBS1,TMSB4X,CYRIB	18/134
3_Member	Reactome Gene Sets	R-HSA-76002	Platelet activation, signaling and aggregation	-10.4175	-7.56026	197,213,350,2147,2153,2162,2335,3920,3959,5054,5340,5341,5478,5627,6647,7040,7057,7114,7534,8525,10630,51571	AHSG,ALB,APOH,F2,F5,F13A1,FN1,LAMP2,LGALS3BP,SERPINE1,PLG,PLEK,PPIA,PROS1,SOD1,TGFB1,THBS1,TMSB4X,YWHAZ,DGKZ,PDPN,CYRIB	22/263
3_Member	GO Biological Processes	GO:0009611	response to wounding	-8.62905	-5.98806	350,958,960,1490,2147,2152,2153,2162,2192,2335,3162,3371,5340,5341,5478,5627,6647,7040,7070,8525,8829,10630,29071,84962,646960,653145	APOH,CD40,CD44,CCN2,F2,F3,F5,F13A1,FBLN1,FN1,HMOX1,TNC,PLG,PLEK,PPIA,PROS1,SOD1,TGFB1,THY1,DGKZ,NRP1,PDPN,C1GALT1C1,AJUBA,PRSS56,ANXA8	26/452
3_Member	GO Biological Processes	GO:0007596	blood coagulation	-8.33108	-5.76068	350,958,2147,2152,2153,2162,2192,5340,5341,5478,5627,8525,10630,29071,646960,653145	APOH,CD40,F2,F3,F5,F13A1,FBLN1,PLG,PLEK,PPIA,PROS1,DGKZ,PDPN,C1GALT1C1,PRSS56,ANXA8	16/174
3_Member	GO Biological Processes	GO:0050817	coagulation	-8.25931	-5.69608	350,958,2147,2152,2153,2162,2192,5340,5341,5478,5627,8525,10630,29071,646960,653145	APOH,CD40,F2,F3,F5,F13A1,FBLN1,PLG,PLEK,PPIA,PROS1,DGKZ,PDPN,C1GALT1C1,PRSS56,ANXA8	16/176
3_Member	GO Biological Processes	GO:0007599	hemostasis	-8.11868	-5.58304	350,958,2147,2152,2153,2162,2192,5340,5341,5478,5627,8525,10630,29071,646960,653145	APOH,CD40,F2,F3,F5,F13A1,FBLN1,PLG,PLEK,PPIA,PROS1,DGKZ,PDPN,C1GALT1C1,PRSS56,ANXA8	16/180
3_Member	GO Biological Processes	GO:0050878	regulation of body fluid levels	-8.10253	-5.57845	100,350,958,2147,2152,2153,2162,2192,4513,5054,5340,5341,5478,5627,7057,8525,10630,11117,29071,84034,646960,653145	ADA,APOH,CD40,F2,F3,F5,F13A1,FBLN1,COX2,SERPINE1,PLG,PLEK,PPIA,PROS1,THBS1,DGKZ,PDPN,EMILIN1,C1GALT1C1,EMILIN2,PRSS56,ANXA8	22/349
3_Member	Reactome Gene Sets	R-HSA-109582	Hemostasis	-8.10093	-5.57845	197,213,350,489,960,2147,2152,2153,2162,2335,2817,3920,3959,4282,5054,5340,5341,5478,5593,5627,6383,6647,7040,7057,7102,7114,7534,8525,10630,51571	AHSG,ALB,APOH,ATP2A3,CD44,F2,F3,F5,F13A1,FN1,GPC1,LAMP2,LGALS3BP,MIF,SERPINE1,PLG,PLEK,PPIA,PRKG2,PROS1,SDC2,SOD1,TGFB1,THBS1,TSPAN7,TMSB4X,YWHAZ,DGKZ,PDPN,CYRIB	30/621
3_Member	GO Biological Processes	GO:0042060	wound healing	-7.74187	-5.25064	350,958,960,2147,2152,2153,2162,2192,2335,3162,5340,5341,5478,5627,7040,8525,10630,29071,84962,646960,653145	APOH,CD40,CD44,F2,F3,F5,F13A1,FBLN1,FN1,HMOX1,PLG,PLEK,PPIA,PROS1,TGFB1,DGKZ,PDPN,C1GALT1C1,AJUBA,PRSS56,ANXA8	21/334
3_Member	GO Biological Processes	GO:0030168	platelet activation	-3.26045	-1.54818	958,2147,5341,5478,8525,10630,29071	CD40,F2,PLEK,PPIA,DGKZ,PDPN,C1GALT1C1	7/99
4_Summary	Reactome Gene Sets	R-HSA-381426	Regulation of Insulin-like Growth Factor (IGF) transport and uptake by Insulin-like Growth Factor Binding Proteins (IGFBPs)	-8.47311	-5.84883	197,213,2147,2153,2200,2335,3371,3490,4052,4240,5340,6383,11098,51280	AHSG,ALB,F2,F5,FBN1,FN1,TNC,IGFBP7,LTBP1,MFGE8,PLG,SDC2,PRSS23,GOLM1	14/-
4_Member	Reactome Gene Sets	R-HSA-381426	Regulation of Insulin-like Growth Factor (IGF) transport and uptake by Insulin-like Growth Factor Binding Proteins (IGFBPs)	-8.47311	-5.84883	197,213,2147,2153,2200,2335,3371,3490,4052,4240,5340,6383,11098,51280	AHSG,ALB,F2,F5,FBN1,FN1,TNC,IGFBP7,LTBP1,MFGE8,PLG,SDC2,PRSS23,GOLM1	14/125
4_Member	Reactome Gene Sets	R-HSA-8957275	Post-translational protein phosphorylation	-7.31023	-4.84816	197,213,2153,2200,2335,3371,3490,4052,4240,6383,11098,51280	AHSG,ALB,F5,FBN1,FN1,TNC,IGFBP7,LTBP1,MFGE8,SDC2,PRSS23,GOLM1	12/108
5_Summary	GO Biological Processes	GO:0010810	regulation of cell-substrate adhesion	-8.41783	-5.82065	1012,1295,1307,2192,2199,2335,4287,4811,5054,5340,7057,7070,8829,10630,11117,26585,30008,255743,1490,2530,5341,5764,960,84962	CDH13,COL8A1,COL16A1,FBLN1,FBLN2,FN1,ATXN3,NID1,SERPINE1,PLG,THBS1,THY1,NRP1,PDPN,EMILIN1,GREM1,EFEMP2,NPNT,CCN2,FUT8,PLEK,PTN,CD44,AJUBA	24/-
5_Member	GO Biological Processes	GO:0010810	regulation of cell-substrate adhesion	-8.41783	-5.82065	1012,1295,1307,2192,2199,2335,4287,4811,5054,5340,7057,7070,8829,10630,11117,26585,30008,255743	CDH13,COL8A1,COL16A1,FBLN1,FBLN2,FN1,ATXN3,NID1,SERPINE1,PLG,THBS1,THY1,NRP1,PDPN,EMILIN1,GREM1,EFEMP2,NPNT	18/222
5_Member	GO Biological Processes	GO:0010811	positive regulation of cell-substrate adhesion	-5.72682	-3.48207	1012,1295,1307,2199,2335,4811,7070,8829,11117,30008,255743	CDH13,COL8A1,COL16A1,FBLN2,FN1,NID1,THY1,NRP1,EMILIN1,EFEMP2,NPNT	11/125
5_Member	GO Biological Processes	GO:0007229	integrin-mediated signaling pathway	-4.21534	-2.27671	1307,1490,2335,2530,5341,5764,7070,8829	COL16A1,CCN2,FN1,FUT8,PLEK,PTN,THY1,NRP1	8/94
5_Member	GO Biological Processes	GO:0001952	regulation of cell-matrix adhesion	-3.35739	-1.62161	1012,1307,5054,7057,7070,8829,26585,30008	CDH13,COL16A1,SERPINE1,THBS1,THY1,NRP1,GREM1,EFEMP2	8/125
5_Member	GO Biological Processes	GO:0007160	cell-matrix adhesion	-3.11485	-1.43561	960,1490,2335,4811,7070,11117,84962,255743	CD44,CCN2,FN1,NID1,THY1,EMILIN1,AJUBA,NPNT	8/136
5_Member	GO Biological Processes	GO:0001954	positive regulation of cell-matrix adhesion	-2.91816	-1.2881	1012,1307,7070,8829,30008	CDH13,COL16A1,THY1,NRP1,EFEMP2	5/56
5_Member	GO Biological Processes	GO:0031589	cell-substrate adhesion	-2.84894	-1.23678	960,1490,2335,4811,7070,8829,11117,84962,255743	CD44,CCN2,FN1,NID1,THY1,NRP1,EMILIN1,AJUBA,NPNT	9/185
5_Member	GO Biological Processes	GO:0051893	regulation of focal adhesion assembly	-2.65827	-1.09646	1307,7057,7070,8829,26585	COL16A1,THBS1,THY1,NRP1,GREM1	5/64
5_Member	GO Biological Processes	GO:0090109	regulation of cell-substrate junction assembly	-2.65827	-1.09646	1307,7057,7070,8829,26585	COL16A1,THBS1,THY1,NRP1,GREM1	5/64
5_Member	GO Biological Processes	GO:0150116	regulation of cell-substrate junction organization	-2.51488	-0.991749	1307,7057,7070,8829,26585	COL16A1,THBS1,THY1,NRP1,GREM1	5/69
5_Member	GO Biological Processes	GO:0051894	positive regulation of focal adhesion assembly	-2.23227	-0.775395	1307,7070,8829	COL16A1,THY1,NRP1	3/26
5_Member	GO Biological Processes	GO:0150117	positive regulation of cell-substrate junction organization	-2.01727	-0.616635	1307,7070,8829	COL16A1,THY1,NRP1	3/31
6_Summary	GO Biological Processes	GO:0030194	positive regulation of blood coagulation	-8.41333	-5.82065	350,2147,2152,5054,5340,7057,11117,84034,5764,8840,5627,65078,199731,213,1491,6647,6948,2153,2335,3371,2162,114112,1997,2040,2597,5091	APOH,F2,F3,SERPINE1,PLG,THBS1,EMILIN1,EMILIN2,PTN,CCN4,PROS1,RTN4R,CADM4,ALB,CTH,SOD1,TCN2,F5,FN1,TNC,F13A1,TXNRD3,ELF1,STOM,GAPDH,PC	26/-
6_Member	GO Biological Processes	GO:0030194	positive regulation of blood coagulation	-8.41333	-5.82065	350,2147,2152,5054,5340,7057,11117,84034	APOH,F2,F3,SERPINE1,PLG,THBS1,EMILIN1,EMILIN2	8/28
6_Member	GO Biological Processes	GO:1900048	positive regulation of hemostasis	-8.41333	-5.82065	350,2147,2152,5054,5340,7057,11117,84034	APOH,F2,F3,SERPINE1,PLG,THBS1,EMILIN1,EMILIN2	8/28
6_Member	GO Biological Processes	GO:0050820	positive regulation of coagulation	-8.1493	-5.60692	350,2147,2152,5054,5340,7057,11117,84034	APOH,F2,F3,SERPINE1,PLG,THBS1,EMILIN1,EMILIN2	8/30
6_Member	GO Biological Processes	GO:1903036	positive regulation of response to wounding	-6.89106	-4.48202	350,2147,2152,5054,5340,5764,7057,8840,11117,84034	APOH,F2,F3,SERPINE1,PLG,PTN,THBS1,CCN4,EMILIN1,EMILIN2	10/76
6_Member	GO Biological Processes	GO:0090303	positive regulation of wound healing	-6.63443	-4.26096	350,2147,2152,5054,5340,7057,8840,11117,84034	APOH,F2,F3,SERPINE1,PLG,THBS1,CCN4,EMILIN1,EMILIN2	9/62
6_Member	GO Biological Processes	GO:0030193	regulation of blood coagulation	-6.22647	-3.91134	350,2147,2152,5054,5340,5627,7057,11117,84034	APOH,F2,F3,SERPINE1,PLG,PROS1,THBS1,EMILIN1,EMILIN2	9/69
6_Member	GO Biological Processes	GO:0051918	negative regulation of fibrinolysis	-6.17218	-3.86895	350,2147,5054,5340,7057	APOH,F2,SERPINE1,PLG,THBS1	5/13
6_Member	GO Biological Processes	GO:1900046	regulation of hemostasis	-6.11875	-3.82709	350,2147,2152,5054,5340,5627,7057,11117,84034	APOH,F2,F3,SERPINE1,PLG,PROS1,THBS1,EMILIN1,EMILIN2	9/71
6_Member	GO Biological Processes	GO:0050818	regulation of coagulation	-5.96365	-3.69064	350,2147,2152,5054,5340,5627,7057,11117,84034	APOH,F2,F3,SERPINE1,PLG,PROS1,THBS1,EMILIN1,EMILIN2	9/74
6_Member	GO Biological Processes	GO:1903034	regulation of response to wounding	-5.87365	-3.61499	350,2147,2152,5054,5340,5627,5764,7057,8840,11117,65078,84034,199731	APOH,F2,F3,SERPINE1,PLG,PROS1,PTN,THBS1,CCN4,EMILIN1,RTN4R,EMILIN2,CADM4	13/173
6_Member	GO Biological Processes	GO:0051917	regulation of fibrinolysis	-5.37445	-3.17511	350,2147,5054,5340,7057	APOH,F2,SERPINE1,PLG,THBS1	5/18
6_Member	GO Biological Processes	GO:0061041	regulation of wound healing	-5.36828	-3.17466	350,2147,2152,5054,5340,5627,7057,8840,11117,84034,199731	APOH,F2,F3,SERPINE1,PLG,PROS1,THBS1,CCN4,EMILIN1,EMILIN2,CADM4	11/136
6_Member	WikiPathways	WP1533	Vitamin B12 metabolism	-5.11551	-2.96285	213,1491,2147,5054,5340,6647,6948	ALB,CTH,F2,SERPINE1,PLG,SOD1,TCN2	7/51
6_Member	WikiPathways	WP272	Blood clotting cascade	-4.90723	-2.78598	2147,2152,2153,5054,5340	F2,F3,F5,SERPINE1,PLG	5/22
6_Member	Canonical Pathways	M165	PID SYNDECAN 4 PATHWAY	-4.07467	-2.17636	2147,2335,3371,5340,7057	F2,FN1,TNC,PLG,THBS1	5/32
6_Member	WikiPathways	WP4927	COVID-19, thrombosis and anticoagulation	-4.01592	-2.13126	2147,2162,5340	F2,F13A1,PLG	3/7
6_Member	GO Biological Processes	GO:0042730	fibrinolysis	-3.87601	-2.016	2147,5054,5340,5627	F2,SERPINE1,PLG,PROS1	4/19
6_Member	WikiPathways	WP558	Complement and coagulation cascades	-3.75681	-1.932	2147,2152,2153,5054,5340,5627	F2,F3,F5,SERPINE1,PLG,PROS1	6/58
6_Member	Reactome Gene Sets	R-HSA-140877	Formation of Fibrin Clot (Clotting Cascade)	-3.65399	-1.84701	2147,2152,2153,2162,5627	F2,F3,F5,F13A1,PROS1	5/39
6_Member	WikiPathways	WP15	Selenium micronutrient network	-3.63445	-1.83243	213,1491,2147,5054,5340,6647,114112	ALB,CTH,F2,SERPINE1,PLG,SOD1,TXNRD3	7/86
6_Member	KEGG Pathway	hsa04610	Complement and coagulation cascades	-3.63445	-1.83243	2147,2152,2153,2162,5054,5340,5627	F2,F3,F5,F13A1,SERPINE1,PLG,PROS1	7/86
6_Member	Reactome Gene Sets	R-HSA-140875	Common Pathway of Fibrin Clot Formation	-3.61487	-1.8202	2147,2153,2162,5627	F2,F5,F13A1,PROS1	4/22
6_Member	GO Biological Processes	GO:0030195	negative regulation of blood coagulation	-3.35764	-1.62161	350,2147,5054,5340,5627	APOH,F2,SERPINE1,PLG,PROS1	5/45
6_Member	WikiPathways	WP176	Folate metabolism	-3.34236	-1.61185	213,1491,2147,5054,5340,6647	ALB,CTH,F2,SERPINE1,PLG,SOD1	6/69
6_Member	GO Biological Processes	GO:1900047	negative regulation of hemostasis	-3.31273	-1.58846	350,2147,5054,5340,5627	APOH,F2,SERPINE1,PLG,PROS1	5/46
6_Member	GO Biological Processes	GO:0050819	negative regulation of coagulation	-3.18454	-1.49016	350,2147,5054,5340,5627	APOH,F2,SERPINE1,PLG,PROS1	5/49
6_Member	GO Biological Processes	GO:1903035	negative regulation of response to wounding	-2.66298	-1.09776	350,2147,5054,5340,5627,65078	APOH,F2,SERPINE1,PLG,PROS1,RTN4R	6/93
6_Member	GO Biological Processes	GO:0061045	negative regulation of wound healing	-2.40897	-0.90798	350,2147,5054,5340,5627	APOH,F2,SERPINE1,PLG,PROS1	5/73
6_Member	Canonical Pathways	M92	PID ANGIOPOIETIN RECEPTOR PATHWAY	-2.28427	-0.815485	1997,2147,2335,5340	ELF1,F2,FN1,PLG	4/49
6_Member	GO Biological Processes	GO:0051702	biological process involved in interaction with symbiont	-2.15542	-0.718016	2040,2147,2335,2597,5091,5340	STOM,F2,FN1,GAPDH,PC,PLG	6/118
7_Summary	GO Biological Processes	GO:0097435	supramolecular fiber organization	-8.36277	-5.77764	58,567,649,1264,1674,2280,3856,3860,3861,3872,3880,4017,4053,4205,7092,7114,8936,9168,10152,11075,11117,23242,26585,27229,30008,51673,57698,80781,84171,3993,4287,5341,5901,6444,10630,29085,54874,54961,55561,90627	ACTA1,B2M,BMP1,CNN1,DES,FKBP1A,KRT8,KRT13,KRT14,KRT17,KRT19,LOXL2,LTBP2,MEF2A,TLL1,TMSB4X,WASF1,TMSB10,ABI2,STMN2,EMILIN1,COBL,GREM1,TUBGCP4,EFEMP2,TPPP3,SHTN1,COL18A1,LOXL4,LLGL2,ATXN3,PLEK,RAN,SGCD,PDPN,PHPT1,FNBP1L,SSH3,CDC42BPG,STARD13	40/-
7_Member	GO Biological Processes	GO:0097435	supramolecular fiber organization	-8.36277	-5.77764	58,567,649,1264,1674,2280,3856,3860,3861,3872,3880,4017,4053,4205,7092,7114,8936,9168,10152,11075,11117,23242,26585,27229,30008,51673,57698,80781,84171	ACTA1,B2M,BMP1,CNN1,DES,FKBP1A,KRT8,KRT13,KRT14,KRT17,KRT19,LOXL2,LTBP2,MEF2A,TLL1,TMSB4X,WASF1,TMSB10,ABI2,STMN2,EMILIN1,COBL,GREM1,TUBGCP4,EFEMP2,TPPP3,SHTN1,COL18A1,LOXL4	29/569
7_Member	GO Biological Processes	GO:0030029	actin filament-based process	-4.2522	-2.30332	58,1264,3856,3880,3993,4205,4287,5341,5901,6444,7114,8936,9168,10152,10630,23242,29085,54874,54961,55561,57698,90627	ACTA1,CNN1,KRT8,KRT19,LLGL2,MEF2A,ATXN3,PLEK,RAN,SGCD,TMSB4X,WASF1,TMSB10,ABI2,PDPN,COBL,PHPT1,FNBP1L,SSH3,CDC42BPG,SHTN1,STARD13	22/597
7_Member	GO Biological Processes	GO:0030036	actin cytoskeleton organization	-3.53926	-1.76111	58,1264,3856,3880,3993,4205,4287,5341,5901,7114,8936,9168,10152,23242,29085,54961,55561,57698,90627	ACTA1,CNN1,KRT8,KRT19,LLGL2,MEF2A,ATXN3,PLEK,RAN,TMSB4X,WASF1,TMSB10,ABI2,COBL,PHPT1,SSH3,CDC42BPG,SHTN1,STARD13	19/536
8_Summary	GO Biological Processes	GO:0044283	small molecule biosynthetic process	-7.90416	-5.39445	100,1491,2023,2224,2805,3251,3422,3613,4023,4282,4706,5091,5723,7083,9104,9536,11315,23417,29108,29968,51477,55276,84245,140838,283871,131,1622,2597,5446,10965,55753,145482,160428	ADA,CTH,ENO1,FDPS,GOT1,HPRT1,IDI1,IMPA2,LPL,MIF,NDUFAB1,PC,PSPH,TK1,RGN,PTGES,PARK7,MLYCD,PYCARD,PSAT1,ISYNA1,PGM2,MRI1,NANP,PGP,ADH7,DBI,GAPDH,PON3,ACOT2,OGDHL,PTGR2,ALDH1L2	33/-
8_Member	GO Biological Processes	GO:0044283	small molecule biosynthetic process	-7.90416	-5.39445	100,1491,2023,2224,2805,3251,3422,3613,4023,4282,4706,5091,5723,7083,9104,9536,11315,23417,29108,29968,51477,55276,84245,140838,283871	ADA,CTH,ENO1,FDPS,GOT1,HPRT1,IDI1,IMPA2,LPL,MIF,NDUFAB1,PC,PSPH,TK1,RGN,PTGES,PARK7,MLYCD,PYCARD,PSAT1,ISYNA1,PGM2,MRI1,NANP,PGP	25/456
8_Member	GO Biological Processes	GO:0046394	carboxylic acid biosynthetic process	-4.35249	-2.37722	1491,2805,4023,4282,4706,5723,9104,9536,11315,23417,29108,29968,84245,140838	CTH,GOT1,LPL,MIF,NDUFAB1,PSPH,RGN,PTGES,PARK7,MLYCD,PYCARD,PSAT1,MRI1,NANP	14/274
8_Member	GO Biological Processes	GO:0016053	organic acid biosynthetic process	-4.30136	-2.34197	1491,2805,4023,4282,4706,5723,9104,9536,11315,23417,29108,29968,84245,140838	CTH,GOT1,LPL,MIF,NDUFAB1,PSPH,RGN,PTGES,PARK7,MLYCD,PYCARD,PSAT1,MRI1,NANP	14/277
8_Member	GO Biological Processes	GO:0032787	monocarboxylic acid metabolic process	-2.51642	-0.992638	131,1622,2023,2597,4023,4282,4706,5091,5446,9536,10965,11315,23417,55753,145482,160428	ADH7,DBI,ENO1,GAPDH,LPL,MIF,NDUFAB1,PC,PON3,PTGES,ACOT2,PARK7,MLYCD,OGDHL,PTGR2,ALDH1L2	16/512
9_Summary	Reactome Gene Sets	R-HSA-1474228	Degradation of the extracellular matrix	-7.83177	-5.32831	649,960,999,1295,1307,2200,2201,2335,3339,4811,5340,5654,7092,80781,3371,7057,4513	BMP1,CD44,CDH1,COL8A1,COL16A1,FBN1,FBN2,FN1,HSPG2,NID1,PLG,HTRA1,TLL1,COL18A1,TNC,THBS1,COX2	17/-
9_Member	Reactome Gene Sets	R-HSA-1474228	Degradation of the extracellular matrix	-7.83177	-5.32831	649,960,999,1295,1307,2200,2201,2335,3339,4811,5340,5654,7092,80781	BMP1,CD44,CDH1,COL8A1,COL16A1,FBN1,FBN2,FN1,HSPG2,NID1,PLG,HTRA1,TLL1,COL18A1	14/140
9_Member	Reactome Gene Sets	R-HSA-216083	Integrin cell surface interactions	-6.42492	-4.08496	960,999,1295,1307,2200,2335,3339,3371,7057,80781	CD44,CDH1,COL8A1,COL16A1,FBN1,FN1,HSPG2,TNC,THBS1,COL18A1	10/85
9_Member	WikiPathways	WP5097	CCL18 signaling pathway	-2.13444	-0.703908	960,999,2335,4513	CD44,CDH1,FN1,COX2	4/54
10_Summary	GO Biological Processes	GO:0032103	positive regulation of response to external stimulus	-7.6852	-5.19997	350,958,975,1012,2147,2152,3148,3916,4023,4282,5054,5340,5764,6885,7040,7057,7114,8829,8840,11117,11315,29108,83666,84034,338322,345611,646960,197,960,2335,3162,3339,3557,11277,51542,57326,100,3105,3371,5654,6647,7534,9536,10162	APOH,CD40,CD81,CDH13,F2,F3,HMGB2,LAMP1,LPL,MIF,SERPINE1,PLG,PTN,MAP3K7,TGFB1,THBS1,TMSB4X,NRP1,CCN4,EMILIN1,PARK7,PYCARD,PARP9,EMILIN2,NLRP10,IRGM,PRSS56,AHSG,CD44,FN1,HMOX1,HSPG2,IL1RN,TREX1,VPS54,PBXIP1,ADA,HLA-A,TNC,HTRA1,SOD1,YWHAZ,PTGES,LPCAT3	44/-
10_Member	GO Biological Processes	GO:0032103	positive regulation of response to external stimulus	-7.6852	-5.19997	350,958,975,1012,2147,2152,3148,3916,4023,4282,5054,5340,5764,6885,7040,7057,7114,8829,8840,11117,11315,29108,83666,84034,338322,345611,646960	APOH,CD40,CD81,CDH13,F2,F3,HMGB2,LAMP1,LPL,MIF,SERPINE1,PLG,PTN,MAP3K7,TGFB1,THBS1,TMSB4X,NRP1,CCN4,EMILIN1,PARK7,PYCARD,PARP9,EMILIN2,NLRP10,IRGM,PRSS56	27/538
10_Member	GO Biological Processes	GO:0006954	inflammatory response	-4.66595	-2.57985	197,958,960,2147,2152,2335,3148,3162,3339,3557,4282,5764,6885,7040,7057,11277,11315,29108,51542,57326,338322,345611	AHSG,CD40,CD44,F2,F3,FN1,HMGB2,HMOX1,HSPG2,IL1RN,MIF,PTN,MAP3K7,TGFB1,THBS1,TREX1,PARK7,PYCARD,VPS54,PBXIP1,NLRP10,IRGM	22/560
10_Member	GO Biological Processes	GO:0031347	regulation of defense response	-4.49639	-2.46668	100,197,958,975,3105,3148,3371,3916,4023,5054,5654,6647,6885,7040,7114,7534,8840,9536,10162,11117,11277,11315,29108,83666,84034,338322,345611	ADA,AHSG,CD40,CD81,HLA-A,HMGB2,TNC,LAMP1,LPL,SERPINE1,HTRA1,SOD1,MAP3K7,TGFB1,TMSB4X,YWHAZ,CCN4,PTGES,LPCAT3,EMILIN1,TREX1,PARK7,PYCARD,PARP9,EMILIN2,NLRP10,IRGM	27/792
10_Member	GO Biological Processes	GO:0050727	regulation of inflammatory response	-3.30411	-1.58244	100,197,975,3371,4023,5054,6647,7114,8840,9536,10162,11277,11315,29108,338322,345611	ADA,AHSG,CD81,TNC,LPL,SERPINE1,SOD1,TMSB4X,CCN4,PTGES,LPCAT3,TREX1,PARK7,PYCARD,NLRP10,IRGM	16/429
10_Member	GO Biological Processes	GO:0031349	positive regulation of defense response	-3.18996	-1.49365	958,975,3148,3916,4023,5054,6885,8840,11117,11315,29108,83666,84034,338322,345611	CD40,CD81,HMGB2,LAMP1,LPL,SERPINE1,MAP3K7,CCN4,EMILIN1,PARK7,PYCARD,PARP9,EMILIN2,NLRP10,IRGM	15/397
10_Member	GO Biological Processes	GO:0002831	regulation of response to biotic stimulus	-2.82178	-1.21751	958,3105,3148,3916,4282,5654,6885,7040,7534,11117,11277,29108,83666,84034,338322,345611	CD40,HLA-A,HMGB2,LAMP1,MIF,HTRA1,MAP3K7,TGFB1,YWHAZ,EMILIN1,TREX1,PYCARD,PARP9,EMILIN2,NLRP10,IRGM	16/477
10_Member	GO Biological Processes	GO:0002833	positive regulation of response to biotic stimulus	-2.60153	-1.05575	958,3148,3916,4282,6885,11117,29108,83666,84034,338322,345611	CD40,HMGB2,LAMP1,MIF,MAP3K7,EMILIN1,PYCARD,PARP9,EMILIN2,NLRP10,IRGM	11/281
11_Summary	Canonical Pathways	M18	PID INTEGRIN1 PATHWAY	-7.49156	-5.02381	975,2162,2200,2335,3371,4811,7045,7057,80781,255743,7070,6383,7040,3339,58,5127,6277,8796,960,999,5054,5340	CD81,F13A1,FBN1,FN1,TNC,NID1,TGFBI,THBS1,COL18A1,NPNT,THY1,SDC2,TGFB1,HSPG2,ACTA1,CDK16,S100A6,SCEL,CD44,CDH1,SERPINE1,PLG	22/-
11_Member	Canonical Pathways	M18	PID INTEGRIN1 PATHWAY	-7.49156	-5.02381	975,2162,2200,2335,3371,4811,7045,7057,80781,255743	CD81,F13A1,FBN1,FN1,TNC,NID1,TGFBI,THBS1,COL18A1,NPNT	10/66
11_Member	Canonical Pathways	M53	PID INTEGRIN3 PATHWAY	-4.5008	-2.46821	2200,2335,3371,7045,7057,7070	FBN1,FN1,TNC,TGFBI,THBS1,THY1	6/43
11_Member	Reactome Gene Sets	R-HSA-3000170	Syndecan interactions	-4.4462	-2.44112	2335,3371,6383,7040,7057	FN1,TNC,SDC2,TGFB1,THBS1	5/27
11_Member	Reactome Gene Sets	R-HSA-3000171	Non-integrin membrane-ECM interactions	-3.71543	-1.89605	2335,3339,3371,6383,7040,7057	FN1,HSPG2,TNC,SDC2,TGFB1,THBS1	6/59
11_Member	WikiPathways	WP5055	Burn wound healing	-3.65469	-1.84701	58,2162,2200,2335,3371,5127,6277,8796	ACTA1,F13A1,FBN1,FN1,TNC,CDK16,S100A6,SCEL	8/113
11_Member	KEGG Pathway	hsa04512	ECM-receptor interaction	-2.78537	-1.18655	960,2335,3339,3371,7057,255743	CD44,FN1,HSPG2,TNC,THBS1,NPNT	6/88
11_Member	WikiPathways	WP3859	TGF-beta signaling in thyroid cells for epithelial-mesenchymal transition	-2.77355	-1.18163	999,2335,3371	CDH1,FN1,TNC	3/17
11_Member	Canonical Pathways	M174	PID UPA UPAR PATHWAY	-2.52755	-1.00229	2335,5054,5340,7040	FN1,SERPINE1,PLG,TGFB1	4/42
11_Member	Reactome Gene Sets	R-HSA-3000178	ECM proteoglycans	-2.33409	-0.850222	2335,3339,3371,5054,7040	FN1,HSPG2,TNC,SERPINE1,TGFB1	5/76
11_Member	Canonical Pathways	M118	PID INTEGRIN A9B1 PATHWAY	-2.28095	-0.815485	2162,2335,3371	F13A1,FN1,TNC	3/25
12_Summary	Reactome Gene Sets	R-HSA-71387	Metabolism of carbohydrates	-7.17999	-4.72629	960,2023,2239,2597,2799,2805,2817,3339,4126,5091,6383,6483,8703,11041,22934,26229,55276,283209,283871,100,3251,5373,6948,7057,29071,91869,8829,4023,55937,2342	CD44,ENO1,GPC4,GAPDH,GNS,GOT1,GPC1,HSPG2,MANBA,PC,SDC2,ST3GAL2,B4GALT3,B4GAT1,RPIA,B3GAT3,PGM2,PGM2L1,PGP,ADA,HPRT1,PMM2,TCN2,THBS1,C1GALT1C1,RFT1,NRP1,LPL,APOM,FNTB	30/-
12_Member	Reactome Gene Sets	R-HSA-71387	Metabolism of carbohydrates	-7.17999	-4.72629	960,2023,2239,2597,2799,2805,2817,3339,4126,5091,6383,6483,8703,11041,22934,26229,55276,283209,283871	CD44,ENO1,GPC4,GAPDH,GNS,GOT1,GPC1,HSPG2,MANBA,PC,SDC2,ST3GAL2,B4GALT3,B4GAT1,RPIA,B3GAT3,PGM2,PGM2L1,PGP	19/297
12_Member	Reactome Gene Sets	R-HSA-5668914	Diseases of metabolism	-6.16747	-3.86813	100,2239,2799,2817,3251,3339,5091,5373,6383,6948,7057,11041,22934,26229,29071,91869	ADA,GPC4,GNS,GPC1,HPRT1,HSPG2,PC,PMM2,SDC2,TCN2,THBS1,B4GAT1,RPIA,B3GAT3,C1GALT1C1,RFT1	16/249
12_Member	Reactome Gene Sets	R-HSA-9694614	Attachment and Entry	-5.24693	-3.06569	2239,2817,3339,6383,8829	GPC4,GPC1,HSPG2,SDC2,NRP1	5/19
12_Member	Reactome Gene Sets	R-HSA-3560801	Defective B3GAT3 causes JDSSDHD	-5.12709	-2.97166	2239,2817,3339,6383,26229	GPC4,GPC1,HSPG2,SDC2,B3GAT3	5/20
12_Member	Reactome Gene Sets	R-HSA-1630316	Glycosaminoglycan metabolism	-4.92169	-2.79061	960,2239,2799,2817,3339,6383,6483,8703,11041,26229	CD44,GPC4,GNS,GPC1,HSPG2,SDC2,ST3GAL2,B4GALT3,B4GAT1,B3GAT3	10/124
12_Member	Reactome Gene Sets	R-HSA-1971475	A tetrasaccharide linker sequence is required for GAG synthesis	-4.53004	-2.48897	2239,2817,3339,6383,26229	GPC4,GPC1,HSPG2,SDC2,B3GAT3	5/26
12_Member	Reactome Gene Sets	R-HSA-975634	Retinoid metabolism and transport	-4.44235	-2.44112	2239,2817,3339,4023,6383,55937	GPC4,GPC1,HSPG2,LPL,SDC2,APOM	6/44
12_Member	Reactome Gene Sets	R-HSA-3656237	Defective EXT2 causes exostoses 2	-4.43943	-2.44112	2239,2817,3339,6383	GPC4,GPC1,HSPG2,SDC2	4/14
12_Member	Reactome Gene Sets	R-HSA-3656253	Defective EXT1 causes exostoses 1, TRPS2 and CHDS	-4.43943	-2.44112	2239,2817,3339,6383	GPC4,GPC1,HSPG2,SDC2	4/14
12_Member	Reactome Gene Sets	R-HSA-3781865	Diseases of glycosylation	-4.3845	-2.40003	2239,2817,3339,5373,6383,7057,11041,26229,29071,91869	GPC4,GPC1,HSPG2,PMM2,SDC2,THBS1,B4GAT1,B3GAT3,C1GALT1C1,RFT1	10/143
12_Member	Reactome Gene Sets	R-HSA-6806667	Metabolism of fat-soluble vitamins	-4.22305	-2.28274	2239,2817,3339,4023,6383,55937	GPC4,GPC1,HSPG2,LPL,SDC2,APOM	6/48
12_Member	Reactome Gene Sets	R-HSA-3560783	Defective B4GALT7 causes EDS, progeroid type	-3.784	-1.94999	2239,2817,3339,6383	GPC4,GPC1,HSPG2,SDC2	4/20
12_Member	Reactome Gene Sets	R-HSA-4420332	Defective B3GALT6 causes EDSP2 and SEMDJL1	-3.784	-1.94999	2239,2817,3339,6383	GPC4,GPC1,HSPG2,SDC2	4/20
12_Member	Reactome Gene Sets	R-HSA-9772572	Early SARS-CoV-2 Infection Events	-3.7085	-1.8927	2239,2817,3339,6383,8829	GPC4,GPC1,HSPG2,SDC2,NRP1	5/38
12_Member	Reactome Gene Sets	R-HSA-2024096	HS-GAG degradation	-3.61487	-1.8202	2239,2817,3339,6383	GPC4,GPC1,HSPG2,SDC2	4/22
12_Member	Reactome Gene Sets	R-HSA-3560782	Diseases associated with glycosaminoglycan metabolism	-3.54966	-1.76576	2239,2817,3339,6383,26229	GPC4,GPC1,HSPG2,SDC2,B3GAT3	5/41
12_Member	Reactome Gene Sets	R-HSA-1793185	Chondroitin sulfate/dermatan sulfate metabolism	-3.14383	-1.45709	2239,2817,3339,6383,26229	GPC4,GPC1,HSPG2,SDC2,B3GAT3	5/50
12_Member	Reactome Gene Sets	R-HSA-2187338	Visual phototransduction	-3.08325	-1.40864	2239,2342,2817,3339,4023,6383,55937	GPC4,FNTB,GPC1,HSPG2,LPL,SDC2,APOM	7/106
12_Member	Reactome Gene Sets	R-HSA-2022928	HS-GAG biosynthesis	-3.02521	-1.3695	2239,2817,3339,6383	GPC4,GPC1,HSPG2,SDC2	4/31
12_Member	Reactome Gene Sets	R-HSA-1638091	Heparan sulfate/heparin (HS-GAG) metabolism	-2.95373	-1.31275	2239,2817,3339,6383,26229	GPC4,GPC1,HSPG2,SDC2,B3GAT3	5/55
13_Summary	GO Biological Processes	GO:0001819	positive regulation of cytokine production	-7.17722	-4.72629	567,958,975,2152,2324,2597,3105,3148,3162,4023,4282,5054,5144,6647,6885,7040,7057,7186,10542,10554,11315,23411,29108,51571,338322,100,684,1490,2147,2335,3916,5341,5621,6604,7070,10630,11117,11277,25793,84034,345611,960,1012,1295,1307,2199,4811,8829,30008,255743,83666,123920,999,3557,5340,2280,3251,3476,5478,8525,29071	B2M,CD40,CD81,F3,FLT4,GAPDH,HLA-A,HMGB2,HMOX1,LPL,MIF,SERPINE1,PDE4D,SOD1,MAP3K7,TGFB1,THBS1,TRAF2,LAMTOR5,AGPAT1,PARK7,SIRT1,PYCARD,CYRIB,NLRP10,ADA,BST2,CCN2,F2,FN1,LAMP1,PLEK,PRNP,SMARCD3,THY1,PDPN,EMILIN1,TREX1,FBXO7,EMILIN2,IRGM,CD44,CDH13,COL8A1,COL16A1,FBLN2,NID1,NRP1,EFEMP2,NPNT,PARP9,CMTM3,CDH1,IL1RN,PLG,FKBP1A,HPRT1,IGBP1,PPIA,DGKZ,C1GALT1C1	61/-
13_Member	GO Biological Processes	GO:0001819	positive regulation of cytokine production	-7.17722	-4.72629	567,958,975,2152,2324,2597,3105,3148,3162,4023,4282,5054,5144,6647,6885,7040,7057,7186,10542,10554,11315,23411,29108,51571,338322	B2M,CD40,CD81,F3,FLT4,GAPDH,HLA-A,HMGB2,HMOX1,LPL,MIF,SERPINE1,PDE4D,SOD1,MAP3K7,TGFB1,THBS1,TRAF2,LAMTOR5,AGPAT1,PARK7,SIRT1,PYCARD,CYRIB,NLRP10	25/497
13_Member	GO Biological Processes	GO:0002821	positive regulation of adaptive immune response	-6.45475	-4.11051	100,567,958,975,3105,6885,7040,7186,23411,29108,51571,338322	ADA,B2M,CD40,CD81,HLA-A,MAP3K7,TGFB1,TRAF2,SIRT1,PYCARD,CYRIB,NLRP10	12/129
13_Member	GO Biological Processes	GO:0002718	regulation of cytokine production involved in immune response	-5.86681	-3.61167	567,684,975,3105,3162,4282,6885,7040,7186,23411,29108	B2M,BST2,CD81,HLA-A,HMOX1,MIF,MAP3K7,TGFB1,TRAF2,SIRT1,PYCARD	11/121
13_Member	GO Biological Processes	GO:0050865	regulation of cell activation	-5.4667	-3.25486	100,567,958,975,1490,2147,2335,3105,3162,3916,4282,5341,5621,6604,6647,7040,7057,7070,10630,11117,11277,25793,29108,51571,84034,345611	ADA,B2M,CD40,CD81,CCN2,F2,FN1,HLA-A,HMOX1,LAMP1,MIF,PLEK,PRNP,SMARCD3,SOD1,TGFB1,THBS1,THY1,PDPN,EMILIN1,TREX1,FBXO7,PYCARD,CYRIB,EMILIN2,IRGM	26/657
13_Member	GO Biological Processes	GO:0002700	regulation of production of molecular mediator of immune response	-5.39569	-3.19015	567,684,958,975,3105,3162,4282,6885,7040,7186,11277,23411,29108	B2M,BST2,CD40,CD81,HLA-A,HMOX1,MIF,MAP3K7,TGFB1,TRAF2,TREX1,SIRT1,PYCARD	13/191
13_Member	GO Biological Processes	GO:0045785	positive regulation of cell adhesion	-5.1464	-2.97968	100,567,960,975,1012,1295,1307,2199,2335,3105,4811,6604,7070,8829,10630,11117,29108,30008,51571,84034,255743	ADA,B2M,CD44,CD81,CDH13,COL8A1,COL16A1,FBLN2,FN1,HLA-A,NID1,SMARCD3,THY1,NRP1,PDPN,EMILIN1,PYCARD,EFEMP2,CYRIB,EMILIN2,NPNT	21/482
13_Member	GO Biological Processes	GO:0002824	positive regulation of adaptive immune response based on somatic recombination of immune receptors built from immunoglobulin superfamily domains	-4.95273	-2.811	100,567,958,975,3105,6885,7040,7186,51571,338322	ADA,B2M,CD40,CD81,HLA-A,MAP3K7,TGFB1,TRAF2,CYRIB,NLRP10	10/123
13_Member	GO Biological Processes	GO:0002720	positive regulation of cytokine production involved in immune response	-4.68467	-2.59618	567,975,3105,4282,6885,7186,23411,29108	B2M,CD81,HLA-A,MIF,MAP3K7,TRAF2,SIRT1,PYCARD	8/81
13_Member	GO Biological Processes	GO:0002702	positive regulation of production of molecular mediator of immune response	-4.59927	-2.53401	567,958,975,3105,4282,6885,7040,7186,23411,29108	B2M,CD40,CD81,HLA-A,MIF,MAP3K7,TGFB1,TRAF2,SIRT1,PYCARD	10/135
13_Member	GO Biological Processes	GO:0002726	positive regulation of T cell cytokine production	-4.53004	-2.48897	567,975,3105,6885,7186	B2M,CD81,HLA-A,MAP3K7,TRAF2	5/26
13_Member	GO Biological Processes	GO:0002819	regulation of adaptive immune response	-4.37532	-2.39598	100,567,958,975,3105,6885,7040,7186,23411,29108,51571,338322	ADA,B2M,CD40,CD81,HLA-A,MAP3K7,TGFB1,TRAF2,SIRT1,PYCARD,CYRIB,NLRP10	12/205
13_Member	GO Biological Processes	GO:0002708	positive regulation of lymphocyte mediated immunity	-4.04659	-2.15393	567,958,975,3105,3916,6885,7040,7186,51571	B2M,CD40,CD81,HLA-A,LAMP1,MAP3K7,TGFB1,TRAF2,CYRIB	9/127
13_Member	GO Biological Processes	GO:0002699	positive regulation of immune effector process	-3.84191	-1.99166	567,958,975,3105,3162,3916,4282,6885,7040,7186,23411,29108,51571	B2M,CD40,CD81,HLA-A,HMOX1,LAMP1,MIF,MAP3K7,TGFB1,TRAF2,SIRT1,PYCARD,CYRIB	13/269
13_Member	GO Biological Processes	GO:0002724	regulation of T cell cytokine production	-3.7085	-1.8927	567,975,3105,6885,7186	B2M,CD81,HLA-A,MAP3K7,TRAF2	5/38
13_Member	GO Biological Processes	GO:0050867	positive regulation of cell activation	-3.69892	-1.88439	100,567,958,975,1490,3105,3916,4282,5341,6604,7040,7057,7070,29108,51571,345611	ADA,B2M,CD40,CD81,CCN2,HLA-A,LAMP1,MIF,PLEK,SMARCD3,TGFB1,THBS1,THY1,PYCARD,CYRIB,IRGM	16/395
13_Member	GO Biological Processes	GO:0050778	positive regulation of immune response	-3.5666	-1.77675	100,567,958,975,3105,3148,3916,5144,6885,7040,7070,7186,11277,11315,23411,29108,51571,83666,123920,338322,345611	ADA,B2M,CD40,CD81,HLA-A,HMGB2,LAMP1,PDE4D,MAP3K7,TGFB1,THY1,TRAF2,TREX1,PARK7,SIRT1,PYCARD,CYRIB,PARP9,CMTM3,NLRP10,IRGM	21/622
13_Member	GO Biological Processes	GO:0002705	positive regulation of leukocyte mediated immunity	-3.52213	-1.74761	567,958,975,3105,3916,6885,7040,7186,51571	B2M,CD40,CD81,HLA-A,LAMP1,MAP3K7,TGFB1,TRAF2,CYRIB	9/149
13_Member	GO Biological Processes	GO:0002822	regulation of adaptive immune response based on somatic recombination of immune receptors built from immunoglobulin superfamily domains	-3.37131	-1.62698	100,567,958,975,3105,6885,7040,7186,51571,338322	ADA,B2M,CD40,CD81,HLA-A,MAP3K7,TGFB1,TRAF2,CYRIB,NLRP10	10/190
13_Member	GO Biological Processes	GO:0002694	regulation of leukocyte activation	-3.35366	-1.61894	100,567,958,975,2335,3105,3162,3916,4282,5621,6604,6647,7040,7057,7070,11277,25793,29108,51571,345611	ADA,B2M,CD40,CD81,FN1,HLA-A,HMOX1,LAMP1,MIF,PRNP,SMARCD3,SOD1,TGFB1,THBS1,THY1,TREX1,FBXO7,PYCARD,CYRIB,IRGM	20/600
13_Member	GO Biological Processes	GO:0002711	positive regulation of T cell mediated immunity	-3.34236	-1.61185	567,975,3105,6885,7186,51571	B2M,CD81,HLA-A,MAP3K7,TRAF2,CYRIB	6/69
13_Member	GO Biological Processes	GO:0002697	regulation of immune effector process	-3.30363	-1.58244	567,684,958,975,3105,3162,3916,4282,6885,7040,7186,11277,23411,29108,51571	B2M,BST2,CD40,CD81,HLA-A,HMOX1,LAMP1,MIF,MAP3K7,TGFB1,TRAF2,TREX1,SIRT1,PYCARD,CYRIB	15/387
13_Member	GO Biological Processes	GO:0022407	regulation of cell-cell adhesion	-3.10358	-1.42804	100,567,960,975,999,3105,3557,5340,5621,6604,7040,7070,10630,11117,29108,51571,84034	ADA,B2M,CD44,CD81,CDH1,HLA-A,IL1RN,PLG,PRNP,SMARCD3,TGFB1,THY1,PDPN,EMILIN1,PYCARD,CYRIB,EMILIN2	17/492
13_Member	GO Biological Processes	GO:0002703	regulation of leukocyte mediated immunity	-3.03024	-1.37011	567,684,958,975,3105,3162,3916,6885,7040,7186,51571	B2M,BST2,CD40,CD81,HLA-A,HMOX1,LAMP1,MAP3K7,TGFB1,TRAF2,CYRIB	11/248
13_Member	GO Biological Processes	GO:0002696	positive regulation of leukocyte activation	-2.93227	-1.2972	100,567,958,975,3105,3916,4282,6604,7040,7057,7070,29108,51571,345611	ADA,B2M,CD40,CD81,HLA-A,LAMP1,MIF,SMARCD3,TGFB1,THBS1,THY1,PYCARD,CYRIB,IRGM	14/378
13_Member	GO Biological Processes	GO:0002706	regulation of lymphocyte mediated immunity	-2.83277	-1.22458	567,958,975,3105,3916,6885,7040,7186,51571	B2M,CD40,CD81,HLA-A,LAMP1,MAP3K7,TGFB1,TRAF2,CYRIB	9/186
13_Member	GO Biological Processes	GO:0022409	positive regulation of cell-cell adhesion	-2.62388	-1.07467	100,567,960,975,3105,6604,7070,10630,11117,29108,51571,84034	ADA,B2M,CD44,CD81,HLA-A,SMARCD3,THY1,PDPN,EMILIN1,PYCARD,CYRIB,EMILIN2	12/321
13_Member	GO Biological Processes	GO:0051249	regulation of lymphocyte activation	-2.58313	-1.04143	100,567,958,975,3105,3916,4282,5621,6604,6647,7040,7070,11277,25793,29108,51571	ADA,B2M,CD40,CD81,HLA-A,LAMP1,MIF,PRNP,SMARCD3,SOD1,TGFB1,THY1,TREX1,FBXO7,PYCARD,CYRIB	16/504
13_Member	GO Biological Processes	GO:0051251	positive regulation of lymphocyte activation	-2.55848	-1.0255	100,567,958,975,3105,3916,4282,6604,7040,7070,29108,51571	ADA,B2M,CD40,CD81,HLA-A,LAMP1,MIF,SMARCD3,TGFB1,THY1,PYCARD,CYRIB	12/327
13_Member	GO Biological Processes	GO:0002709	regulation of T cell mediated immunity	-2.54852	-1.01819	567,975,3105,6885,7186,51571	B2M,CD81,HLA-A,MAP3K7,TRAF2,CYRIB	6/98
13_Member	GO Biological Processes	GO:0001775	cell activation	-2.43925	-0.931423	100,567,684,958,960,975,2147,2280,3105,3251,3476,5341,5478,7040,8525,10630,11277,25793,29071,29108	ADA,B2M,BST2,CD40,CD44,CD81,F2,FKBP1A,HLA-A,HPRT1,IGBP1,PLEK,PPIA,TGFB1,DGKZ,PDPN,TREX1,FBXO7,C1GALT1C1,PYCARD	20/717
14_Summary	GO Biological Processes	GO:0030198	extracellular matrix organization	-7.05433	-4.60887	649,1295,1307,1490,2192,4017,4811,5340,7040,7045,7092,11117,26585,30008,57326,80781,84171,255743,26577,1476,2147,2162,5054,5654,2239,2817,3557,3963,5764,6277,6383,653145	BMP1,COL8A1,COL16A1,CCN2,FBLN1,LOXL2,NID1,PLG,TGFB1,TGFBI,TLL1,EMILIN1,GREM1,EFEMP2,PBXIP1,COL18A1,LOXL4,NPNT,PCOLCE2,CSTB,F2,F13A1,SERPINE1,HTRA1,GPC4,GPC1,IL1RN,LGALS7,PTN,S100A6,SDC2,ANXA8	32/-
14_Member	GO Biological Processes	GO:0030198	extracellular matrix organization	-7.05433	-4.60887	649,1295,1307,1490,2192,4017,4811,5340,7040,7045,7092,11117,26585,30008,57326,80781,84171,255743	BMP1,COL8A1,COL16A1,CCN2,FBLN1,LOXL2,NID1,PLG,TGFB1,TGFBI,TLL1,EMILIN1,GREM1,EFEMP2,PBXIP1,COL18A1,LOXL4,NPNT	18/272
14_Member	GO Biological Processes	GO:0043062	extracellular structure organization	-7.03035	-4.59996	649,1295,1307,1490,2192,4017,4811,5340,7040,7045,7092,11117,26585,30008,57326,80781,84171,255743	BMP1,COL8A1,COL16A1,CCN2,FBLN1,LOXL2,NID1,PLG,TGFB1,TGFBI,TLL1,EMILIN1,GREM1,EFEMP2,PBXIP1,COL18A1,LOXL4,NPNT	18/273
14_Member	GO Biological Processes	GO:0045229	external encapsulating structure organization	-6.98272	-4.55845	649,1295,1307,1490,2192,4017,4811,5340,7040,7045,7092,11117,26585,30008,57326,80781,84171,255743	BMP1,COL8A1,COL16A1,CCN2,FBLN1,LOXL2,NID1,PLG,TGFB1,TGFBI,TLL1,EMILIN1,GREM1,EFEMP2,PBXIP1,COL18A1,LOXL4,NPNT	18/275
14_Member	WikiPathways	WP3874	Canonical and non-canonical TGF-B signaling	-5.51067	-3.28921	649,4017,7040,26585,84171	BMP1,LOXL2,TGFB1,GREM1,LOXL4	5/17
14_Member	Reactome Gene Sets	R-HSA-1474290	Collagen formation	-4.35103	-2.37722	649,1295,1307,4017,7092,26577,80781,84171	BMP1,COL8A1,COL16A1,LOXL2,TLL1,PCOLCE2,COL18A1,LOXL4	8/90
14_Member	Reactome Gene Sets	R-HSA-2243919	Crosslinking of collagen fibrils	-3.97377	-2.09943	649,4017,7092,84171	BMP1,LOXL2,TLL1,LOXL4	4/18
14_Member	GO Biological Processes	GO:0030199	collagen fibril organization	-3.75681	-1.932	649,4017,7092,26585,80781,84171	BMP1,LOXL2,TLL1,GREM1,COL18A1,LOXL4	6/58
14_Member	Reactome Gene Sets	R-HSA-2022090	Assembly of collagen fibrils and other multimeric structures	-3.6351	-1.83243	649,1295,4017,7092,80781,84171	BMP1,COL8A1,LOXL2,TLL1,COL18A1,LOXL4	6/61
14_Member	Reactome Gene Sets	R-HSA-1650814	Collagen biosynthesis and modifying enzymes	-3.41162	-1.65965	649,1295,1307,7092,26577,80781	BMP1,COL8A1,COL16A1,TLL1,PCOLCE2,COL18A1	6/67
14_Member	Canonical Pathways	M3468	NABA ECM REGULATORS	-2.63177	-1.07793	649,1476,2147,2162,4017,5054,5340,5654,7092,84171	BMP1,CSTB,F2,F13A1,LOXL2,SERPINE1,PLG,HTRA1,TLL1,LOXL4	10/238
14_Member	Canonical Pathways	M5885	NABA MATRISOME ASSOCIATED	-2.22148	-0.766128	649,1476,2147,2162,2239,2817,3557,3963,4017,5054,5340,5654,5764,6277,6383,7040,7092,26585,84171,653145	BMP1,CSTB,F2,F13A1,GPC4,GPC1,IL1RN,LGALS7,LOXL2,SERPINE1,PLG,HTRA1,PTN,S100A6,SDC2,TGFB1,TLL1,GREM1,LOXL4,ANXA8	20/751
15_Summary	Reactome Gene Sets	R-HSA-15869	Metabolism of nucleotides	-6.75075	-4.35158	100,159,1635,2745,3251,3704,4833,5198,7083,10591,79077,2941,567,1491	ADA,ADSS2,DCTD,GLRX,HPRT1,ITPA,NME4,PFAS,TK1,DNPH1,DCTPP1,GSTA4,B2M,CTH	14/-
15_Member	Reactome Gene Sets	R-HSA-15869	Metabolism of nucleotides	-6.75075	-4.35158	100,159,1635,2745,3251,3704,4833,5198,7083,10591,79077	ADA,ADSS2,DCTD,GLRX,HPRT1,ITPA,NME4,PFAS,TK1,DNPH1,DCTPP1	11/99
15_Member	KEGG Pathway	hsa01232	Nucleotide metabolism	-4.53118	-2.48897	100,159,1635,3251,3704,4833,7083,79077	ADA,ADSS2,DCTD,HPRT1,ITPA,NME4,TK1,DCTPP1	8/85
15_Member	Reactome Gene Sets	R-HSA-499943	Interconversion of nucleotide di- and triphosphates	-3.08033	-1.40756	1635,2745,4833,79077	DCTD,GLRX,NME4,DCTPP1	4/30
15_Member	KEGG Pathway	hsa00983	Drug metabolism - other enzymes	-2.23973	-0.778793	2941,3251,3704,4833,7083	GSTA4,HPRT1,ITPA,NME4,TK1	5/80
15_Member	KEGG Pathway	hsa00240	Pyrimidine metabolism	-2.02607	-0.621995	1635,4833,7083,79077	DCTD,NME4,TK1,DCTPP1	4/58
15_Member	GO Biological Processes	GO:0051289	protein homotetramerization	-2.00039	-0.607034	567,1491,3251,7083	B2M,CTH,HPRT1,TK1	4/59
16_Summary	GO Biological Processes	GO:1901136	carbohydrate derivative catabolic process	-6.73484	-4.34533	100,960,2517,2799,2817,3094,3251,3704,4126,5144,7040,23417,55577,79077,10591,3162,5446,8882,10535,11277,51542,84153,129563,5337,51573	ADA,CD44,FUCA1,GNS,GPC1,HINT1,HPRT1,ITPA,MANBA,PDE4D,TGFB1,MLYCD,NAGK,DCTPP1,DNPH1,HMOX1,PON3,ZPR1,RNASEH2A,TREX1,VPS54,RNASEH2C,DIS3L2,PLD1,GDE1	25/-
16_Member	GO Biological Processes	GO:1901136	carbohydrate derivative catabolic process	-6.73484	-4.34533	100,960,2517,2799,2817,3094,3251,3704,4126,5144,7040,23417,55577,79077	ADA,CD44,FUCA1,GNS,GPC1,HINT1,HPRT1,ITPA,MANBA,PDE4D,TGFB1,MLYCD,NAGK,DCTPP1	14/171
16_Member	GO Biological Processes	GO:0006195	purine nucleotide catabolic process	-5.05804	-2.91088	100,3094,3251,3704,5144,10591,23417	ADA,HINT1,HPRT1,ITPA,PDE4D,DNPH1,MLYCD	7/52
16_Member	GO Biological Processes	GO:0009166	nucleotide catabolic process	-4.88969	-2.77158	100,3094,3251,3704,5144,10591,23417,79077	ADA,HINT1,HPRT1,ITPA,PDE4D,DNPH1,MLYCD,DCTPP1	8/76
16_Member	GO Biological Processes	GO:0072523	purine-containing compound catabolic process	-4.78879	-2.6882	100,3094,3251,3704,5144,10591,23417	ADA,HINT1,HPRT1,ITPA,PDE4D,DNPH1,MLYCD	7/57
16_Member	GO Biological Processes	GO:0046700	heterocycle catabolic process	-4.64353	-2.56342	100,3094,3162,3251,3704,5144,5446,8882,10535,10591,11277,23417,51542,79077,84153,129563	ADA,HINT1,HMOX1,HPRT1,ITPA,PDE4D,PON3,ZPR1,RNASEH2A,DNPH1,TREX1,MLYCD,VPS54,DCTPP1,RNASEH2C,DIS3L2	16/328
16_Member	GO Biological Processes	GO:0046434	organophosphate catabolic process	-4.54412	-2.49169	100,3094,3251,3704,5144,5337,10591,23417,51573,79077	ADA,HINT1,HPRT1,ITPA,PDE4D,PLD1,DNPH1,MLYCD,GDE1,DCTPP1	10/137
16_Member	GO Biological Processes	GO:1901292	nucleoside phosphate catabolic process	-4.53118	-2.48897	100,3094,3251,3704,5144,10591,23417,79077	ADA,HINT1,HPRT1,ITPA,PDE4D,DNPH1,MLYCD,DCTPP1	8/85
16_Member	GO Biological Processes	GO:0009154	purine ribonucleotide catabolic process	-4.5008	-2.46821	100,3094,3251,3704,5144,23417	ADA,HINT1,HPRT1,ITPA,PDE4D,MLYCD	6/43
16_Member	GO Biological Processes	GO:0019439	aromatic compound catabolic process	-4.37951	-2.39831	100,3094,3162,3251,3704,5144,5446,8882,10535,10591,11277,23417,51542,79077,84153,129563	ADA,HINT1,HMOX1,HPRT1,ITPA,PDE4D,PON3,ZPR1,RNASEH2A,DNPH1,TREX1,MLYCD,VPS54,DCTPP1,RNASEH2C,DIS3L2	16/345
16_Member	GO Biological Processes	GO:0009261	ribonucleotide catabolic process	-4.17154	-2.24458	100,3094,3251,3704,5144,23417	ADA,HINT1,HPRT1,ITPA,PDE4D,MLYCD	6/49
16_Member	GO Biological Processes	GO:0034655	nucleobase-containing compound catabolic process	-4.13624	-2.22064	100,3094,3251,3704,5144,8882,10535,10591,11277,23417,51542,79077,84153,129563	ADA,HINT1,HPRT1,ITPA,PDE4D,ZPR1,RNASEH2A,DNPH1,TREX1,MLYCD,VPS54,DCTPP1,RNASEH2C,DIS3L2	14/287
16_Member	GO Biological Processes	GO:0044270	cellular nitrogen compound catabolic process	-4.10402	-2.19951	100,3094,3162,3251,3704,5144,8882,10535,10591,11277,23417,51542,79077,84153,129563	ADA,HINT1,HMOX1,HPRT1,ITPA,PDE4D,ZPR1,RNASEH2A,DNPH1,TREX1,MLYCD,VPS54,DCTPP1,RNASEH2C,DIS3L2	15/326
16_Member	GO Biological Processes	GO:1901361	organic cyclic compound catabolic process	-3.94218	-2.07506	100,3094,3162,3251,3704,5144,5446,8882,10535,10591,11277,23417,51542,79077,84153,129563	ADA,HINT1,HMOX1,HPRT1,ITPA,PDE4D,PON3,ZPR1,RNASEH2A,DNPH1,TREX1,MLYCD,VPS54,DCTPP1,RNASEH2C,DIS3L2	16/376
16_Member	GO Biological Processes	GO:0009143	nucleoside triphosphate catabolic process	-3.13131	-1.44927	100,3704,79077	ADA,ITPA,DCTPP1	3/13
17_Summary	GO Biological Processes	GO:0046486	glycerolipid metabolic process	-6.70747	-4.3227	350,1622,2171,3613,3633,4023,5337,5341,8525,8871,10162,10554,23411,23556,51573,54965,57153,64788,84962,283871,2224,3422,51477,2583,4282,4706,6483,8703,9536,23417,213,2170,5446,5901,6604,9256,10965,23760,145482	APOH,DBI,FABP5,IMPA2,INPP5B,LPL,PLD1,PLEK,DGKZ,SYNJ2,LPCAT3,AGPAT1,SIRT1,PIGN,GDE1,PIGX,SLC44A2,LMF1,AJUBA,PGP,FDPS,IDI1,ISYNA1,B4GALNT1,MIF,NDUFAB1,ST3GAL2,B4GALT3,PTGES,MLYCD,ALB,FABP3,PON3,RAN,SMARCD3,TSPOAP1,ACOT2,PITPNB,PTGR2	39/-
17_Member	GO Biological Processes	GO:0046486	glycerolipid metabolic process	-6.70747	-4.3227	350,1622,2171,3613,3633,4023,5337,5341,8525,8871,10162,10554,23411,23556,51573,54965,57153,64788,84962,283871	APOH,DBI,FABP5,IMPA2,INPP5B,LPL,PLD1,PLEK,DGKZ,SYNJ2,LPCAT3,AGPAT1,SIRT1,PIGN,GDE1,PIGX,SLC44A2,LMF1,AJUBA,PGP	20/351
17_Member	GO Biological Processes	GO:0006644	phospholipid metabolic process	-6.60944	-4.2451	1622,2171,2224,3422,3613,3633,4023,5337,5341,8525,8871,10162,10554,23556,51477,51573,54965,57153,84962,283871	DBI,FABP5,FDPS,IDI1,IMPA2,INPP5B,LPL,PLD1,PLEK,DGKZ,SYNJ2,LPCAT3,AGPAT1,PIGN,ISYNA1,GDE1,PIGX,SLC44A2,AJUBA,PGP	20/356
17_Member	GO Biological Processes	GO:0006650	glycerophospholipid metabolic process	-5.42323	-3.21455	1622,2171,3613,3633,5337,5341,8525,8871,10162,10554,23556,51573,54965,57153,84962,283871	DBI,FABP5,IMPA2,INPP5B,PLD1,PLEK,DGKZ,SYNJ2,LPCAT3,AGPAT1,PIGN,GDE1,PIGX,SLC44A2,AJUBA,PGP	16/284
17_Member	GO Biological Processes	GO:0008654	phospholipid biosynthetic process	-4.90876	-2.78598	2171,2224,3422,3613,5337,8525,8871,10162,10554,23556,51477,54965,57153,84962	FABP5,FDPS,IDI1,IMPA2,PLD1,DGKZ,SYNJ2,LPCAT3,AGPAT1,PIGN,ISYNA1,PIGX,SLC44A2,AJUBA	14/244
17_Member	GO Biological Processes	GO:0008610	lipid biosynthetic process	-4.24157	-2.29613	2171,2224,2583,3422,3613,4023,4282,4706,5337,6483,8525,8703,8871,9536,10162,10554,23417,23556,51477,54965,57153,84962	FABP5,FDPS,B4GALNT1,IDI1,IMPA2,LPL,MIF,NDUFAB1,PLD1,ST3GAL2,DGKZ,B4GALT3,SYNJ2,PTGES,LPCAT3,AGPAT1,MLYCD,PIGN,ISYNA1,PIGX,SLC44A2,AJUBA	22/598
17_Member	GO Biological Processes	GO:0045017	glycerolipid biosynthetic process	-4.02439	-2.13522	2171,3613,4023,5337,8525,8871,10162,10554,23556,54965,57153,84962	FABP5,IMPA2,LPL,PLD1,DGKZ,SYNJ2,LPCAT3,AGPAT1,PIGN,PIGX,SLC44A2,AJUBA	12/223
17_Member	GO Biological Processes	GO:0046474	glycerophospholipid biosynthetic process	-3.76267	-1.93394	2171,3613,5337,8525,8871,10162,10554,23556,54965,57153,84962	FABP5,IMPA2,PLD1,DGKZ,SYNJ2,LPCAT3,AGPAT1,PIGN,PIGX,SLC44A2,AJUBA	11/203
17_Member	Reactome Gene Sets	R-HSA-556833	Metabolism of lipids	-3.32029	-1.59291	213,1622,2170,2171,2224,2583,3422,4706,5337,5446,5901,6604,8871,9256,9536,10162,10554,10965,23417,23760,51573,57153,145482	ALB,DBI,FABP3,FABP5,FDPS,B4GALNT1,IDI1,NDUFAB1,PLD1,PON3,RAN,SMARCD3,SYNJ2,TSPOAP1,PTGES,LPCAT3,AGPAT1,ACOT2,MLYCD,PITPNB,GDE1,SLC44A2,PTGR2	23/743
17_Member	GO Biological Processes	GO:0006656	phosphatidylcholine biosynthetic process	-2.28095	-0.815485	2171,10162,57153	FABP5,LPCAT3,SLC44A2	3/25
18_Summary	GO Biological Processes	GO:0045936	negative regulation of phosphate metabolic process	-6.64933	-4.26925	2192,2280,2810,5144,5341,5478,5524,5621,6992,7040,7070,7345,9104,9770,11117,11315,23411,25793,26585,29108,84962,199731,197,960,1476,2597,3434,3476,5054,7057,10542,29085,83666,653145,1622,754,2023,4282,7114,51564,51571,57447,345611,1111,1490,2324,2530,4287,5764,6604,6647,7186,7336,10162,65078	FBLN1,FKBP1A,SFN,PDE4D,PLEK,PPIA,PTPA,PRNP,PPP1R11,TGFB1,THY1,UCHL1,RGN,RASSF2,EMILIN1,PARK7,SIRT1,FBXO7,GREM1,PYCARD,AJUBA,CADM4,AHSG,CD44,CSTB,GAPDH,IFIT1,IGBP1,SERPINE1,THBS1,LAMTOR5,PHPT1,PARP9,ANXA8,DBI,PTTG1IP,ENO1,MIF,TMSB4X,HDAC7,CYRIB,NDRG2,IRGM,CHEK1,CCN2,FLT4,FUT8,ATXN3,PTN,SMARCD3,SOD1,TRAF2,UBE2V2,LPCAT3,RTN4R	55/-
18_Member	GO Biological Processes	GO:0045936	negative regulation of phosphate metabolic process	-6.64933	-4.26925	2192,2280,2810,5144,5341,5478,5524,5621,6992,7040,7070,7345,9104,9770,11117,11315,23411,25793,26585,29108,84962,199731	FBLN1,FKBP1A,SFN,PDE4D,PLEK,PPIA,PTPA,PRNP,PPP1R11,TGFB1,THY1,UCHL1,RGN,RASSF2,EMILIN1,PARK7,SIRT1,FBXO7,GREM1,PYCARD,AJUBA,CADM4	22/422
18_Member	GO Biological Processes	GO:0010563	negative regulation of phosphorus metabolic process	-6.63179	-4.26096	2192,2280,2810,5144,5341,5478,5524,5621,6992,7040,7070,7345,9104,9770,11117,11315,23411,25793,26585,29108,84962,199731	FBLN1,FKBP1A,SFN,PDE4D,PLEK,PPIA,PTPA,PRNP,PPP1R11,TGFB1,THY1,UCHL1,RGN,RASSF2,EMILIN1,PARK7,SIRT1,FBXO7,GREM1,PYCARD,AJUBA,CADM4	22/423
18_Member	GO Biological Processes	GO:0043086	negative regulation of catalytic activity	-5.59879	-3.36418	197,960,1476,2280,2597,2810,3434,3476,5054,5478,5524,5621,6992,7057,7070,7345,9104,10542,11315,23411,25793,29085,29108,83666,84962,653145	AHSG,CD44,CSTB,FKBP1A,GAPDH,SFN,IFIT1,IGBP1,SERPINE1,PPIA,PTPA,PRNP,PPP1R11,THBS1,THY1,UCHL1,RGN,LAMTOR5,PARK7,SIRT1,FBXO7,PHPT1,PYCARD,PARP9,AJUBA,ANXA8	26/646
18_Member	GO Biological Processes	GO:0042326	negative regulation of phosphorylation	-5.23103	-3.05565	2192,2810,5144,5478,5621,7040,7070,7345,9104,9770,11117,11315,23411,25793,26585,29108,84962,199731	FBLN1,SFN,PDE4D,PPIA,PRNP,TGFB1,THY1,UCHL1,RGN,RASSF2,EMILIN1,PARK7,SIRT1,FBXO7,GREM1,PYCARD,AJUBA,CADM4	18/364
18_Member	GO Biological Processes	GO:0001933	negative regulation of protein phosphorylation	-5.13672	-2.97286	2192,2810,5144,5478,5621,7040,7070,7345,9104,9770,11117,11315,23411,25793,26585,29108,199731	FBLN1,SFN,PDE4D,PPIA,PRNP,TGFB1,THY1,UCHL1,RGN,RASSF2,EMILIN1,PARK7,SIRT1,FBXO7,GREM1,PYCARD,CADM4	17/334
18_Member	GO Biological Processes	GO:0031400	negative regulation of protein modification process	-5.13274	-2.9717	1622,2192,2280,2810,5144,5478,5524,5621,6992,7040,7070,7345,9104,9770,11117,11315,23411,25793,26585,29108,199731	DBI,FBLN1,FKBP1A,SFN,PDE4D,PPIA,PTPA,PRNP,PPP1R11,TGFB1,THY1,UCHL1,RGN,RASSF2,EMILIN1,PARK7,SIRT1,FBXO7,GREM1,PYCARD,CADM4	21/483
18_Member	GO Biological Processes	GO:1902532	negative regulation of intracellular signal transduction	-5.08594	-2.93604	754,960,2023,2192,3476,4282,5144,5341,5478,5621,7057,7114,7345,9770,11117,11315,23411,29108,51564,51571,57447,84962,345611	PTTG1IP,CD44,ENO1,FBLN1,IGBP1,MIF,PDE4D,PLEK,PPIA,PRNP,THBS1,TMSB4X,UCHL1,RASSF2,EMILIN1,PARK7,SIRT1,PYCARD,HDAC7,CYRIB,NDRG2,AJUBA,IRGM	23/566
18_Member	GO Biological Processes	GO:0080135	regulation of cellular response to stress	-4.53003	-2.48897	754,960,1111,1490,2023,2324,2530,3476,4282,4287,5478,5764,6604,6647,7070,7186,7336,9770,10162,11315,23411,25793,29108,65078,84962	PTTG1IP,CD44,CHEK1,CCN2,ENO1,FLT4,FUT8,IGBP1,MIF,ATXN3,PPIA,PTN,SMARCD3,SOD1,THY1,TRAF2,UBE2V2,RASSF2,LPCAT3,PARK7,SIRT1,FBXO7,PYCARD,RTN4R,AJUBA	25/700
18_Member	GO Biological Processes	GO:0051348	negative regulation of transferase activity	-2.7741	-1.18163	2810,5478,7070,7345,9104,11315,23411,25793,29085,29108,84962	SFN,PPIA,THY1,UCHL1,RGN,PARK7,SIRT1,FBXO7,PHPT1,PYCARD,AJUBA	11/267
18_Member	GO Biological Processes	GO:0033673	negative regulation of kinase activity	-2.72615	-1.14401	2810,5478,7070,7345,9104,11315,23411,25793,29108,84962	SFN,PPIA,THY1,UCHL1,RGN,PARK7,SIRT1,FBXO7,PYCARD,AJUBA	10/231
18_Member	GO Biological Processes	GO:0006469	negative regulation of protein kinase activity	-2.49079	-0.970887	2810,5478,7070,7345,9104,11315,23411,25793,29108	SFN,PPIA,THY1,UCHL1,RGN,PARK7,SIRT1,FBXO7,PYCARD	9/209
19_Summary	GO Biological Processes	GO:0035581	sequestering of extracellular ligand from receptor	-6.60688	-4.2451	2200,2201,4052,26585,64388,1490,4053,5054,2280,2817,5654,7040,7057,7323,8829,8936,11117,23390,23411,199731,255743,3557,5341,11315,51167	FBN1,FBN2,LTBP1,GREM1,GREM2,CCN2,LTBP2,SERPINE1,FKBP1A,GPC1,HTRA1,TGFB1,THBS1,UBE2D3,NRP1,WASF1,EMILIN1,ZDHHC17,SIRT1,CADM4,NPNT,IL1RN,PLEK,PARK7,CYB5R4	25/-
19_Member	GO Biological Processes	GO:0035581	sequestering of extracellular ligand from receptor	-6.60688	-4.2451	2200,2201,4052,26585,64388	FBN1,FBN2,LTBP1,GREM1,GREM2	5/11
19_Member	GO Biological Processes	GO:1900115	extracellular regulation of signal transduction	-6.17218	-3.86895	2200,2201,4052,26585,64388	FBN1,FBN2,LTBP1,GREM1,GREM2	5/13
19_Member	GO Biological Processes	GO:1900116	extracellular negative regulation of signal transduction	-6.17218	-3.86895	2200,2201,4052,26585,64388	FBN1,FBN2,LTBP1,GREM1,GREM2	5/13
19_Member	WikiPathways	WP3668	Hypothesized pathways in pathogenesis of cardiovascular disease	-5.94352	-3.67775	1490,2200,2201,4052,4053,5054	CCN2,FBN1,FBN2,LTBP1,LTBP2,SERPINE1	6/25
19_Member	GO Biological Processes	GO:0090287	regulation of cellular response to growth factor stimulus	-5.51846	-3.29375	2200,2201,2280,2817,4052,5654,7040,7057,7323,8829,8936,11117,23390,23411,26585,64388,199731,255743	FBN1,FBN2,FKBP1A,GPC1,LTBP1,HTRA1,TGFB1,THBS1,UBE2D3,NRP1,WASF1,EMILIN1,ZDHHC17,SIRT1,GREM1,GREM2,CADM4,NPNT	18/347
19_Member	GO Biological Processes	GO:0035583	sequestering of TGFbeta in extracellular matrix	-4.94405	-2.805	2200,2201,4052	FBN1,FBN2,LTBP1	3/4
19_Member	GO Biological Processes	GO:0017015	regulation of transforming growth factor beta receptor signaling pathway	-4.20852	-2.27326	2200,2201,2280,4052,5654,7040,7057,11117,23411,255743	FBN1,FBN2,FKBP1A,LTBP1,HTRA1,TGFB1,THBS1,EMILIN1,SIRT1,NPNT	10/150
19_Member	GO Biological Processes	GO:1903844	regulation of cellular response to transforming growth factor beta stimulus	-4.13623	-2.22064	2200,2201,2280,4052,5654,7040,7057,11117,23411,255743	FBN1,FBN2,FKBP1A,LTBP1,HTRA1,TGFB1,THBS1,EMILIN1,SIRT1,NPNT	10/153
19_Member	GO Biological Processes	GO:0090288	negative regulation of cellular response to growth factor stimulus	-4.02034	-2.13418	2200,2817,5654,7057,7323,11117,26585,64388,199731	FBN1,GPC1,HTRA1,THBS1,UBE2D3,EMILIN1,GREM1,GREM2,CADM4	9/128
19_Member	GO Biological Processes	GO:0071694	maintenance of protein location in extracellular region	-3.81642	-1.97029	2200,2201,4052	FBN1,FBN2,LTBP1	3/8
19_Member	GO Biological Processes	GO:0090101	negative regulation of transmembrane receptor protein serine/threonine kinase signaling pathway	-3.73735	-1.91383	2200,2201,2280,4052,5654,7323,11117,23411,26585,64388	FBN1,FBN2,FKBP1A,LTBP1,HTRA1,UBE2D3,EMILIN1,SIRT1,GREM1,GREM2	10/171
19_Member	WikiPathways	WP4816	TGF-beta receptor signaling in skeletal dysplasias	-3.71543	-1.89605	2200,2280,4052,5054,7040,7057	FBN1,FKBP1A,LTBP1,SERPINE1,TGFB1,THBS1	6/59
19_Member	Reactome Gene Sets	R-HSA-9006936	Signaling by TGFB family members	-3.42826	-1.67299	2200,2280,4052,4053,5054,7040,7323,64388	FBN1,FKBP1A,LTBP1,LTBP2,SERPINE1,TGFB1,UBE2D3,GREM2	8/122
19_Member	Reactome Gene Sets	R-HSA-170834	Signaling by TGF-beta Receptor Complex	-3.42512	-1.67205	2200,2280,4052,4053,5054,7040,7323	FBN1,FKBP1A,LTBP1,LTBP2,SERPINE1,TGFB1,UBE2D3	7/93
19_Member	GO Biological Processes	GO:0090092	regulation of transmembrane receptor protein serine/threonine kinase signaling pathway	-3.34336	-1.61185	2200,2201,2280,4052,5654,7040,7057,7323,11117,23411,26585,64388,255743	FBN1,FBN2,FKBP1A,LTBP1,HTRA1,TGFB1,THBS1,UBE2D3,EMILIN1,SIRT1,GREM1,GREM2,NPNT	13/303
19_Member	Reactome Gene Sets	R-HSA-2173789	TGF-beta receptor signaling activates SMADs	-3.31273	-1.58846	2200,2280,4052,4053,7040	FBN1,FKBP1A,LTBP1,LTBP2,TGFB1	5/46
19_Member	GO Biological Processes	GO:0071692	protein localization to extracellular region	-3.22188	-1.51874	2200,2201,3557,4052,4053,5341,11315,51167	FBN1,FBN2,IL1RN,LTBP1,LTBP2,PLEK,PARK7,CYB5R4	8/131
19_Member	GO Biological Processes	GO:0030512	negative regulation of transforming growth factor beta receptor signaling pathway	-3.18266	-1.48932	2200,2201,2280,4052,5654,11117,23411	FBN1,FBN2,FKBP1A,LTBP1,HTRA1,EMILIN1,SIRT1	7/102
19_Member	WikiPathways	WP560	TGF-beta receptor signaling	-2.95373	-1.31275	2280,4052,5054,7040,7057	FKBP1A,LTBP1,SERPINE1,TGFB1,THBS1	5/55
19_Member	KEGG Pathway	hsa04350	TGF-beta signaling pathway	-2.54852	-1.01819	2200,4052,7040,7057,26585,64388	FBN1,LTBP1,TGFB1,THBS1,GREM1,GREM2	6/98
19_Member	GO Biological Processes	GO:0030514	negative regulation of BMP signaling pathway	-2.46101	-0.948779	2200,5654,7323,26585,64388	FBN1,HTRA1,UBE2D3,GREM1,GREM2	5/71
20_Summary	GO Biological Processes	GO:0001944	vasculature development	-6.55824	-4.20091	1012,1295,1490,2321,2324,2335,3162,3339,4017,4240,5054,6444,7040,7045,7057,7070,7534,8829,9693,10630,11277,23411,26585,30008,51564,958,2152,5764,7114,8840,23587,29085,29108,57698,131578,646960,100,350,684,999,2192,4282,5797,9104,11117,84034,90627,348110,23242,255743,567,2810,3148,3664,5654,975,51571	CDH13,COL8A1,CCN2,FLT1,FLT4,FN1,HMOX1,HSPG2,LOXL2,MFGE8,SERPINE1,SGCD,TGFB1,TGFBI,THBS1,THY1,YWHAZ,NRP1,RAPGEF2,PDPN,TREX1,SIRT1,GREM1,EFEMP2,HDAC7,CD40,F3,PTN,TMSB4X,CCN4,ELP5,PHPT1,PYCARD,SHTN1,LRRC15,PRSS56,ADA,APOH,BST2,CDH1,FBLN1,MIF,PTPRM,RGN,EMILIN1,EMILIN2,STARD13,ARPIN,COBL,NPNT,B2M,SFN,HMGB2,IRF6,HTRA1,CD81,CYRIB	57/-
20_Member	GO Biological Processes	GO:0001944	vasculature development	-6.55824	-4.20091	1012,1295,1490,2321,2324,2335,3162,3339,4017,4240,5054,6444,7040,7045,7057,7070,7534,8829,9693,10630,11277,23411,26585,30008,51564	CDH13,COL8A1,CCN2,FLT1,FLT4,FN1,HMOX1,HSPG2,LOXL2,MFGE8,SERPINE1,SGCD,TGFB1,TGFBI,THBS1,THY1,YWHAZ,NRP1,RAPGEF2,PDPN,TREX1,SIRT1,GREM1,EFEMP2,HDAC7	25/536
20_Member	GO Biological Processes	GO:0048514	blood vessel morphogenesis	-6.51059	-4.16203	1012,1295,1490,2321,2324,2335,3162,3339,4017,4240,5054,6444,7040,7045,7057,7070,7534,8829,23411,26585,30008,51564	CDH13,COL8A1,CCN2,FLT1,FLT4,FN1,HMOX1,HSPG2,LOXL2,MFGE8,SERPINE1,SGCD,TGFB1,TGFBI,THBS1,THY1,YWHAZ,NRP1,SIRT1,GREM1,EFEMP2,HDAC7	22/430
20_Member	GO Biological Processes	GO:0001525	angiogenesis	-6.3519	-4.02038	1012,1295,1490,2321,2324,2335,3162,3339,4017,4240,5054,7040,7045,7057,7070,7534,8829,23411,26585	CDH13,COL8A1,CCN2,FLT1,FLT4,FN1,HMOX1,HSPG2,LOXL2,MFGE8,SERPINE1,TGFB1,TGFBI,THBS1,THY1,YWHAZ,NRP1,SIRT1,GREM1	19/336
20_Member	GO Biological Processes	GO:0001568	blood vessel development	-6.2824	-3.95503	1012,1295,1490,2321,2324,2335,3162,3339,4017,4240,5054,6444,7040,7045,7057,7070,7534,8829,9693,11277,23411,26585,30008,51564	CDH13,COL8A1,CCN2,FLT1,FLT4,FN1,HMOX1,HSPG2,LOXL2,MFGE8,SERPINE1,SGCD,TGFB1,TGFBI,THBS1,THY1,YWHAZ,NRP1,RAPGEF2,TREX1,SIRT1,GREM1,EFEMP2,HDAC7	24/517
20_Member	GO Biological Processes	GO:2000147	positive regulation of cell motility	-5.75979	-3.50814	958,1012,2152,2321,2324,2335,3162,5054,5764,7040,7057,7070,7114,8829,8840,9693,10630,23411,23587,29085,29108,51564,57698,131578,646960	CD40,CDH13,F3,FLT1,FLT4,FN1,HMOX1,SERPINE1,PTN,TGFB1,THBS1,THY1,TMSB4X,NRP1,CCN4,RAPGEF2,PDPN,SIRT1,ELP5,PHPT1,PYCARD,HDAC7,SHTN1,LRRC15,PRSS56	25/593
20_Member	GO Biological Processes	GO:0030335	positive regulation of cell migration	-5.56912	-3.33996	958,1012,2152,2321,2324,2335,3162,5054,5764,7040,7057,7070,7114,8829,8840,9693,10630,23411,23587,29108,51564,57698,131578,646960	CD40,CDH13,F3,FLT1,FLT4,FN1,HMOX1,SERPINE1,PTN,TGFB1,THBS1,THY1,TMSB4X,NRP1,CCN4,RAPGEF2,PDPN,SIRT1,ELP5,PYCARD,HDAC7,SHTN1,LRRC15,PRSS56	24/568
20_Member	GO Biological Processes	GO:0040017	positive regulation of locomotion	-5.56794	-3.33996	958,1012,2152,2321,2324,2335,3162,5054,5764,7040,7057,7070,7114,8829,8840,9693,10630,23411,23587,29085,29108,51564,57698,131578,646960	CD40,CDH13,F3,FLT1,FLT4,FN1,HMOX1,SERPINE1,PTN,TGFB1,THBS1,THY1,TMSB4X,NRP1,CCN4,RAPGEF2,PDPN,SIRT1,ELP5,PHPT1,PYCARD,HDAC7,SHTN1,LRRC15,PRSS56	25/608
20_Member	GO Biological Processes	GO:0043536	positive regulation of blood vessel endothelial cell migration	-4.93261	-2.79889	958,3162,7040,7057,7114,8829,23411,51564	CD40,HMOX1,TGFB1,THBS1,TMSB4X,NRP1,SIRT1,HDAC7	8/75
20_Member	GO Biological Processes	GO:0040013	negative regulation of locomotion	-4.83862	-2.72559	100,350,684,999,2192,3162,4282,5054,5797,7040,7057,7070,8829,9104,11117,26585,84034,90627,348110	ADA,APOH,BST2,CDH1,FBLN1,HMOX1,MIF,SERPINE1,PTPRM,TGFB1,THBS1,THY1,NRP1,RGN,EMILIN1,GREM1,EMILIN2,STARD13,ARPIN	19/427
20_Member	GO Biological Processes	GO:2000146	negative regulation of cell motility	-4.82542	-2.71741	100,350,684,999,2192,3162,4282,5054,5797,7040,7057,7070,9104,11117,26585,84034,90627,348110	ADA,APOH,BST2,CDH1,FBLN1,HMOX1,MIF,SERPINE1,PTPRM,TGFB1,THBS1,THY1,RGN,EMILIN1,GREM1,EMILIN2,STARD13,ARPIN	18/390
20_Member	GO Biological Processes	GO:0035239	tube morphogenesis	-4.74778	-2.64993	1012,1295,1490,2321,2324,2335,3162,3339,4017,4240,5054,6444,7040,7045,7057,7070,7534,8829,23242,23411,26585,30008,51564,90627,255743	CDH13,COL8A1,CCN2,FLT1,FLT4,FN1,HMOX1,HSPG2,LOXL2,MFGE8,SERPINE1,SGCD,TGFB1,TGFBI,THBS1,THY1,YWHAZ,NRP1,COBL,SIRT1,GREM1,EFEMP2,HDAC7,STARD13,NPNT	25/679
20_Member	GO Biological Processes	GO:0010594	regulation of endothelial cell migration	-4.49301	-2.46668	350,958,2324,3162,5764,5797,7040,7057,7114,8829,23411,51564,90627	APOH,CD40,FLT4,HMOX1,PTN,PTPRM,TGFB1,THBS1,TMSB4X,NRP1,SIRT1,HDAC7,STARD13	13/232
20_Member	GO Biological Processes	GO:0050678	regulation of epithelial cell proliferation	-4.42906	-2.43757	350,567,1012,2152,2321,2324,2810,3148,3162,3664,5654,5764,5797,7040,7057,8829,9104,23411	APOH,B2M,CDH13,F3,FLT1,FLT4,SFN,HMGB2,HMOX1,IRF6,HTRA1,PTN,PTPRM,TGFB1,THBS1,NRP1,RGN,SIRT1	18/418
20_Member	GO Biological Processes	GO:0001936	regulation of endothelial cell proliferation	-4.11934	-2.21011	350,1012,2152,2321,2324,3148,3162,5797,7057,8829,23411	APOH,CDH13,F3,FLT1,FLT4,HMGB2,HMOX1,PTPRM,THBS1,NRP1,SIRT1	11/185
20_Member	GO Biological Processes	GO:0045766	positive regulation of angiogenesis	-4.11934	-2.21011	958,2152,2321,3162,5054,7057,8829,11117,23411,26585,84034	CD40,F3,FLT1,HMOX1,SERPINE1,THBS1,NRP1,EMILIN1,SIRT1,GREM1,EMILIN2	11/185
20_Member	GO Biological Processes	GO:1904018	positive regulation of vasculature development	-4.11934	-2.21011	958,2152,2321,3162,5054,7057,8829,11117,23411,26585,84034	CD40,F3,FLT1,HMOX1,SERPINE1,THBS1,NRP1,EMILIN1,SIRT1,GREM1,EMILIN2	11/185
20_Member	GO Biological Processes	GO:0030336	negative regulation of cell migration	-3.95547	-2.08404	100,350,684,999,3162,4282,5054,5797,7040,7057,7070,11117,26585,84034,90627,348110	ADA,APOH,BST2,CDH1,HMOX1,MIF,SERPINE1,PTPRM,TGFB1,THBS1,THY1,EMILIN1,GREM1,EMILIN2,STARD13,ARPIN	16/375
20_Member	GO Biological Processes	GO:0002685	regulation of leukocyte migration	-3.95146	-2.08147	100,975,3162,4282,5054,5764,7057,7070,11117,26585,29108,646960	ADA,CD81,HMOX1,MIF,SERPINE1,PTN,THBS1,THY1,EMILIN1,GREM1,PYCARD,PRSS56	12/227
20_Member	GO Biological Processes	GO:0010595	positive regulation of endothelial cell migration	-3.9431	-2.07506	958,2324,3162,7040,7057,7114,8829,23411,51564	CD40,FLT4,HMOX1,TGFB1,THBS1,TMSB4X,NRP1,SIRT1,HDAC7	9/131
20_Member	GO Biological Processes	GO:0050920	regulation of chemotaxis	-3.89787	-2.03646	1012,2152,4282,5054,5764,7040,7057,7114,8829,26585,51571,646960	CDH13,F3,MIF,SERPINE1,PTN,TGFB1,THBS1,TMSB4X,NRP1,GREM1,CYRIB,PRSS56	12/230
20_Member	GO Biological Processes	GO:0050921	positive regulation of chemotaxis	-3.65496	-1.84701	1012,2152,5054,5764,7040,7057,7114,8829,646960	CDH13,F3,SERPINE1,PTN,TGFB1,THBS1,TMSB4X,NRP1,PRSS56	9/143
20_Member	GO Biological Processes	GO:0043535	regulation of blood vessel endothelial cell migration	-3.45826	-1.69741	958,3162,7040,7057,7114,8829,23411,51564,90627	CD40,HMOX1,TGFB1,THBS1,TMSB4X,NRP1,SIRT1,HDAC7,STARD13	9/152
20_Member	GO Biological Processes	GO:0010632	regulation of epithelial cell migration	-3.45336	-1.69364	350,958,2324,3162,5764,5797,7040,7057,7114,8829,23411,51564,90627	APOH,CD40,FLT4,HMOX1,PTN,PTPRM,TGFB1,THBS1,TMSB4X,NRP1,SIRT1,HDAC7,STARD13	13/295
20_Member	GO Biological Processes	GO:0045765	regulation of angiogenesis	-3.25384	-1.54377	350,958,2152,2321,3162,3339,5054,5797,7057,8829,11117,23411,26585,84034	APOH,CD40,F3,FLT1,HMOX1,HSPG2,SERPINE1,PTPRM,THBS1,NRP1,EMILIN1,SIRT1,GREM1,EMILIN2	14/350
20_Member	GO Biological Processes	GO:1901342	regulation of vasculature development	-3.18177	-1.48932	350,958,2152,2321,3162,3339,5054,5797,7057,8829,11117,23411,26585,84034	APOH,CD40,F3,FLT1,HMOX1,HSPG2,SERPINE1,PTPRM,THBS1,NRP1,EMILIN1,SIRT1,GREM1,EMILIN2	14/356
20_Member	GO Biological Processes	GO:0010634	positive regulation of epithelial cell migration	-2.99998	-1.3469	958,2324,3162,7040,7057,7114,8829,23411,51564	CD40,FLT4,HMOX1,TGFB1,THBS1,TMSB4X,NRP1,SIRT1,HDAC7	9/176
20_Member	GO Biological Processes	GO:0001938	positive regulation of endothelial cell proliferation	-2.87579	-1.25196	1012,2152,2324,3148,3162,8829,23411	CDH13,F3,FLT4,HMGB2,HMOX1,NRP1,SIRT1	7/115
20_Member	GO Biological Processes	GO:0050679	positive regulation of epithelial cell proliferation	-2.29484	-0.820187	1012,2152,2324,3148,3162,5654,5764,8829,23411	CDH13,F3,FLT4,HMGB2,HMOX1,HTRA1,PTN,NRP1,SIRT1	9/224
20_Member	GO Biological Processes	GO:0090049	regulation of cell migration involved in sprouting angiogenesis	-2.23973	-0.778793	3162,7057,8829,51564,90627	HMOX1,THBS1,NRP1,HDAC7,STARD13	5/80
20_Member	GO Biological Processes	GO:0002688	regulation of leukocyte chemotaxis	-2.02169	-0.618604	4282,5054,5764,7057,26585,646960	MIF,SERPINE1,PTN,THBS1,GREM1,PRSS56	6/126

## Sheet: Δ9 D3 UP
GroupID	Category	Term	Description	LogP	Log(q-value)	Genes	Symbols	InTerm_InList
1_Summary	Reactome Gene Sets	R-HSA-1474244	Extracellular matrix organization	-24.754	-20.4054	649,960,1295,1307,2192,2199,2200,2201,2335,3339,3371,4017,4052,4053,4237,4811,5054,5340,5654,6383,7040,7057,7092,11117,26577,30008,80781,84034,84171,1490,3490,4240,6586,7045,8840,64129,255743	BMP1,CD44,COL8A1,COL16A1,FBLN1,FBLN2,FBN1,FBN2,FN1,HSPG2,TNC,LOXL2,LTBP1,LTBP2,MFAP2,NID1,SERPINE1,PLG,HTRA1,SDC2,TGFB1,THBS1,TLL1,EMILIN1,PCOLCE2,EFEMP2,COL18A1,EMILIN2,LOXL4,CCN2,IGFBP7,MFGE8,SLIT3,TGFBI,CCN4,TINAGL1,NPNT	37/-
1_Member	Reactome Gene Sets	R-HSA-1474244	Extracellular matrix organization	-24.754	-20.4054	649,960,1295,1307,2192,2199,2200,2201,2335,3339,3371,4017,4052,4053,4237,4811,5054,5340,5654,6383,7040,7057,7092,11117,26577,30008,80781,84034,84171	BMP1,CD44,COL8A1,COL16A1,FBLN1,FBLN2,FBN1,FBN2,FN1,HSPG2,TNC,LOXL2,LTBP1,LTBP2,MFAP2,NID1,SERPINE1,PLG,HTRA1,SDC2,TGFB1,THBS1,TLL1,EMILIN1,PCOLCE2,EFEMP2,COL18A1,EMILIN2,LOXL4	29/300
1_Member	Canonical Pathways	M5884	NABA CORE MATRISOME	-23.2289	-19.1814	1295,1307,1490,2192,2199,2200,2201,2335,3339,3371,3490,4052,4053,4237,4240,4811,6586,7045,7057,8840,11117,26577,30008,64129,80781,84034,255743	COL8A1,COL16A1,CCN2,FBLN1,FBLN2,FBN1,FBN2,FN1,HSPG2,TNC,IGFBP7,LTBP1,LTBP2,MFAP2,MFGE8,NID1,SLIT3,TGFBI,THBS1,CCN4,EMILIN1,PCOLCE2,EFEMP2,TINAGL1,COL18A1,EMILIN2,NPNT	27/275
1_Member	Canonical Pathways	M3008	NABA ECM GLYCOPROTEINS	-21.6006	-17.7292	1490,2192,2199,2200,2201,2335,3371,3490,4052,4053,4237,4240,4811,6586,7045,7057,8840,11117,26577,30008,64129,84034,255743	CCN2,FBLN1,FBLN2,FBN1,FBN2,FN1,TNC,IGFBP7,LTBP1,LTBP2,MFAP2,MFGE8,NID1,SLIT3,TGFBI,THBS1,CCN4,EMILIN1,PCOLCE2,EFEMP2,TINAGL1,EMILIN2,NPNT	23/196
1_Member	Reactome Gene Sets	R-HSA-1566948	Elastic fibre formation	-19.8554	-16.1089	2192,2199,2200,2201,2335,4017,4052,4053,4237,7040,11117,30008,84034,84171	FBLN1,FBLN2,FBN1,FBN2,FN1,LOXL2,LTBP1,LTBP2,MFAP2,TGFB1,EMILIN1,EFEMP2,EMILIN2,LOXL4	14/44
1_Member	Reactome Gene Sets	R-HSA-2129379	Molecules associated with elastic fibres	-17.2023	-13.8396	2192,2199,2200,2201,2335,4052,4053,4237,7040,11117,30008,84034	FBLN1,FBLN2,FBN1,FBN2,FN1,LTBP1,LTBP2,MFAP2,TGFB1,EMILIN1,EFEMP2,EMILIN2	12/37
1_Member	Reactome Gene Sets	R-HSA-1474228	Degradation of the extracellular matrix	-11.0795	-8.34376	649,960,1295,1307,2200,2201,2335,3339,4811,5340,5654,7092,80781	BMP1,CD44,COL8A1,COL16A1,FBN1,FBN2,FN1,HSPG2,NID1,PLG,HTRA1,TLL1,COL18A1	13/140
2_Summary	GO Biological Processes	GO:0019646	aerobic electron transport chain	-18.2171	-14.5675	1345,1349,1350,4512,4513,4514,4538,4694,4696,4701,4706,4713,4714,4725,4731,6392,11232,4017,5593,6604,28958,493753,55753,2530,2583,4833,6483,7040,8703,9556,11041,11277,23417,23556,26229,29071,54965,64409,91869,200185,10840,160428,3162,5337,5621,6908,83666,5091,10965,10162,10554,57153,4023,51566	COX6C,COX7B,COX7C,COX1,COX2,COX3,ND4,NDUFA1,NDUFA3,NDUFA7,NDUFAB1,NDUFB7,NDUFB8,NDUFS5,NDUFV3,SDHD,POLG2,LOXL2,PRKG2,SMARCD3,COA3,COA5,OGDHL,FUT8,B4GALNT1,NME4,ST3GAL2,TGFB1,B4GALT3,ATP5MJ,B4GAT1,TREX1,MLYCD,PIGN,B3GAT3,C1GALT1C1,PIGX,GALNT17,RFT1,KRTCAP2,ALDH1L1,ALDH1L2,HMOX1,PLD1,PRNP,TBP,PARP9,PC,ACOT2,LPCAT3,AGPAT1,SLC44A2,LPL,ARMCX3	54/-
2_Member	GO Biological Processes	GO:0019646	aerobic electron transport chain	-18.2171	-14.5675	1345,1349,1350,4512,4513,4514,4538,4694,4696,4701,4706,4713,4714,4725,4731,6392	COX6C,COX7B,COX7C,COX1,COX2,COX3,ND4,NDUFA1,NDUFA3,NDUFA7,NDUFAB1,NDUFB7,NDUFB8,NDUFS5,NDUFV3,SDHD	16/89
2_Member	GO Biological Processes	GO:0042773	ATP synthesis coupled electron transport	-17.8143	-14.3109	1345,1349,1350,4512,4513,4514,4538,4694,4696,4701,4706,4713,4714,4725,4731,6392	COX6C,COX7B,COX7C,COX1,COX2,COX3,ND4,NDUFA1,NDUFA3,NDUFA7,NDUFAB1,NDUFB7,NDUFB8,NDUFS5,NDUFV3,SDHD	16/94
2_Member	GO Biological Processes	GO:0042775	mitochondrial ATP synthesis coupled electron transport	-17.8143	-14.3109	1345,1349,1350,4512,4513,4514,4538,4694,4696,4701,4706,4713,4714,4725,4731,6392	COX6C,COX7B,COX7C,COX1,COX2,COX3,ND4,NDUFA1,NDUFA3,NDUFA7,NDUFAB1,NDUFB7,NDUFB8,NDUFS5,NDUFV3,SDHD	16/94
2_Member	GO Biological Processes	GO:0022904	respiratory electron transport chain	-17.6768	-14.2313	1345,1349,1350,4512,4513,4514,4538,4694,4696,4701,4706,4713,4714,4725,4731,6392,11232	COX6C,COX7B,COX7C,COX1,COX2,COX3,ND4,NDUFA1,NDUFA3,NDUFA7,NDUFAB1,NDUFB7,NDUFB8,NDUFS5,NDUFV3,SDHD,POLG2	17/117
2_Member	Reactome Gene Sets	R-HSA-611105	Respiratory electron transport	-17.1467	-13.8396	1345,1349,1350,4512,4513,4514,4538,4694,4696,4701,4706,4713,4714,4725,4731,6392	COX6C,COX7B,COX7C,COX1,COX2,COX3,ND4,NDUFA1,NDUFA3,NDUFA7,NDUFAB1,NDUFB7,NDUFB8,NDUFS5,NDUFV3,SDHD	16/103
2_Member	WikiPathways	WP111	Electron transport chain: OXPHOS system in mitochondria	-17.1467	-13.8396	1345,1349,1350,4512,4513,4514,4538,4694,4696,4701,4706,4713,4714,4725,4731,6392	COX6C,COX7B,COX7C,COX1,COX2,COX3,ND4,NDUFA1,NDUFA3,NDUFA7,NDUFAB1,NDUFB7,NDUFB8,NDUFS5,NDUFV3,SDHD	16/103
2_Member	GO Biological Processes	GO:0022900	electron transport chain	-16.1713	-12.9215	1345,1349,1350,4017,4512,4513,4514,4538,4694,4696,4701,4706,4713,4714,4725,4731,6392,11232	COX6C,COX7B,COX7C,LOXL2,COX1,COX2,COX3,ND4,NDUFA1,NDUFA3,NDUFA7,NDUFAB1,NDUFB7,NDUFB8,NDUFS5,NDUFV3,SDHD,POLG2	18/170
2_Member	KEGG Pathway	hsa04714	Thermogenesis	-16.1561	-12.9215	1345,1349,1350,4512,4513,4514,4538,4694,4696,4701,4706,4713,4714,4725,4731,5593,6392,6604,28958,493753	COX6C,COX7B,COX7C,COX1,COX2,COX3,ND4,NDUFA1,NDUFA3,NDUFA7,NDUFAB1,NDUFB7,NDUFB8,NDUFS5,NDUFV3,PRKG2,SDHD,SMARCD3,COA3,COA5	20/232
2_Member	GO Biological Processes	GO:0006119	oxidative phosphorylation	-15.9885	-12.786	1345,1349,1350,4512,4513,4514,4538,4694,4696,4701,4706,4713,4714,4725,4731,6392	COX6C,COX7B,COX7C,COX1,COX2,COX3,ND4,NDUFA1,NDUFA3,NDUFA7,NDUFAB1,NDUFB7,NDUFB8,NDUFS5,NDUFV3,SDHD	16/121
2_Member	Reactome Gene Sets	R-HSA-163200	Respiratory electron transport, ATP synthesis by chemiosmotic coupling, and heat production by uncoupling proteins.	-15.6446	-12.4721	1345,1349,1350,4512,4513,4514,4538,4694,4696,4701,4706,4713,4714,4725,4731,6392	COX6C,COX7B,COX7C,COX1,COX2,COX3,ND4,NDUFA1,NDUFA3,NDUFA7,NDUFAB1,NDUFB7,NDUFB8,NDUFS5,NDUFV3,SDHD	16/127
2_Member	KEGG Pathway	hsa00190	Oxidative phosphorylation	-15.2656	-12.1212	1345,1349,1350,4512,4513,4514,4538,4694,4696,4701,4706,4713,4714,4725,4731,6392	COX6C,COX7B,COX7C,COX1,COX2,COX3,ND4,NDUFA1,NDUFA3,NDUFA7,NDUFAB1,NDUFB7,NDUFB8,NDUFS5,NDUFV3,SDHD	16/134
2_Member	GO Biological Processes	GO:0009060	aerobic respiration	-15.1858	-12.0677	1345,1349,1350,4512,4513,4514,4538,4694,4696,4701,4706,4713,4714,4725,4731,6392,55753	COX6C,COX7B,COX7C,COX1,COX2,COX3,ND4,NDUFA1,NDUFA3,NDUFA7,NDUFAB1,NDUFB7,NDUFB8,NDUFS5,NDUFV3,SDHD,OGDHL	17/163
2_Member	GO Biological Processes	GO:0045333	cellular respiration	-15.1061	-12.0128	1345,1349,1350,4512,4513,4514,4538,4694,4696,4701,4706,4713,4714,4725,4731,6392,11232,55753	COX6C,COX7B,COX7C,COX1,COX2,COX3,ND4,NDUFA1,NDUFA3,NDUFA7,NDUFAB1,NDUFB7,NDUFB8,NDUFS5,NDUFV3,SDHD,POLG2,OGDHL	18/195
2_Member	GO Biological Processes	GO:1901137	carbohydrate derivative biosynthetic process	-14.6429	-11.5731	2530,2583,4538,4694,4696,4701,4706,4713,4714,4725,4731,4833,6392,6483,7040,8703,9556,11041,11277,23417,23556,26229,29071,54965,64409,91869,200185	FUT8,B4GALNT1,ND4,NDUFA1,NDUFA3,NDUFA7,NDUFAB1,NDUFB7,NDUFB8,NDUFS5,NDUFV3,NME4,SDHD,ST3GAL2,TGFB1,B4GALT3,ATP5MJ,B4GAT1,TREX1,MLYCD,PIGN,B3GAT3,C1GALT1C1,PIGX,GALNT17,RFT1,KRTCAP2	27/594
2_Member	GO Biological Processes	GO:0006091	generation of precursor metabolites and energy	-14.2891	-11.2423	1345,1349,1350,4017,4512,4513,4514,4538,4694,4696,4701,4706,4713,4714,4725,4731,6392,10840,11232,11277,55753,160428	COX6C,COX7B,COX7C,LOXL2,COX1,COX2,COX3,ND4,NDUFA1,NDUFA3,NDUFA7,NDUFAB1,NDUFB7,NDUFB8,NDUFS5,NDUFV3,SDHD,ALDH1L1,POLG2,TREX1,OGDHL,ALDH1L2	22/372
2_Member	WikiPathways	WP4396	Nonalcoholic fatty liver disease	-14.2485	-11.2423	1345,1349,1350,4512,4513,4514,4694,4696,4701,4706,4713,4714,4725,4731,6392,7040	COX6C,COX7B,COX7C,COX1,COX2,COX3,NDUFA1,NDUFA3,NDUFA7,NDUFAB1,NDUFB7,NDUFB8,NDUFS5,NDUFV3,SDHD,TGFB1	16/155
2_Member	KEGG Pathway	hsa04932	Non-alcoholic fatty liver disease	-14.2485	-11.2423	1345,1349,1350,4512,4513,4514,4694,4696,4701,4706,4713,4714,4725,4731,6392,7040	COX6C,COX7B,COX7C,COX1,COX2,COX3,NDUFA1,NDUFA3,NDUFA7,NDUFAB1,NDUFB7,NDUFB8,NDUFS5,NDUFV3,SDHD,TGFB1	16/155
2_Member	KEGG Pathway	hsa05208	Chemical carcinogenesis - reactive oxygen species	-14.0801	-11.0933	1345,1349,1350,3162,4512,4513,4514,4538,4694,4696,4701,4706,4713,4714,4725,4731,5337,6392	COX6C,COX7B,COX7C,HMOX1,COX1,COX2,COX3,ND4,NDUFA1,NDUFA3,NDUFA7,NDUFAB1,NDUFB7,NDUFB8,NDUFS5,NDUFV3,PLD1,SDHD	18/223
2_Member	KEGG Pathway	hsa05415	Diabetic cardiomyopathy	-13.5872	-10.6188	1345,1349,1350,4512,4513,4514,4538,4694,4696,4701,4706,4713,4714,4725,4731,6392,7040	COX6C,COX7B,COX7C,COX1,COX2,COX3,ND4,NDUFA1,NDUFA3,NDUFA7,NDUFAB1,NDUFB7,NDUFB8,NDUFS5,NDUFV3,SDHD,TGFB1	17/203
2_Member	Reactome Gene Sets	R-HSA-1428517	The citric acid (TCA) cycle and respiratory electron transport	-13.2969	-10.3463	1345,1349,1350,4512,4513,4514,4538,4694,4696,4701,4706,4713,4714,4725,4731,6392	COX6C,COX7B,COX7C,COX1,COX2,COX3,ND4,NDUFA1,NDUFA3,NDUFA7,NDUFAB1,NDUFB7,NDUFB8,NDUFS5,NDUFV3,SDHD	16/178
2_Member	GO Biological Processes	GO:0009206	purine ribonucleoside triphosphate biosynthetic process	-13.1617	-10.2281	4538,4694,4696,4701,4706,4713,4714,4725,4731,4833,6392,7040,9556	ND4,NDUFA1,NDUFA3,NDUFA7,NDUFAB1,NDUFB7,NDUFB8,NDUFS5,NDUFV3,NME4,SDHD,TGFB1,ATP5MJ	13/97
2_Member	GO Biological Processes	GO:0009145	purine nucleoside triphosphate biosynthetic process	-13.1023	-10.1851	4538,4694,4696,4701,4706,4713,4714,4725,4731,4833,6392,7040,9556	ND4,NDUFA1,NDUFA3,NDUFA7,NDUFAB1,NDUFB7,NDUFB8,NDUFS5,NDUFV3,NME4,SDHD,TGFB1,ATP5MJ	13/98
2_Member	GO Biological Processes	GO:0009201	ribonucleoside triphosphate biosynthetic process	-12.8153	-9.94058	4538,4694,4696,4701,4706,4713,4714,4725,4731,4833,6392,7040,9556	ND4,NDUFA1,NDUFA3,NDUFA7,NDUFAB1,NDUFB7,NDUFB8,NDUFS5,NDUFV3,NME4,SDHD,TGFB1,ATP5MJ	13/103
2_Member	GO Biological Processes	GO:0015980	energy derivation by oxidation of organic compounds	-12.812	-9.94058	1345,1349,1350,4512,4513,4514,4538,4694,4696,4701,4706,4713,4714,4725,4731,6392,11232,55753	COX6C,COX7B,COX7C,COX1,COX2,COX3,ND4,NDUFA1,NDUFA3,NDUFA7,NDUFAB1,NDUFB7,NDUFB8,NDUFS5,NDUFV3,SDHD,POLG2,OGDHL	18/264
2_Member	GO Biological Processes	GO:0006754	ATP biosynthetic process	-12.4055	-9.58838	4538,4694,4696,4701,4706,4713,4714,4725,4731,6392,7040,9556	ND4,NDUFA1,NDUFA3,NDUFA7,NDUFAB1,NDUFB7,NDUFB8,NDUFS5,NDUFV3,SDHD,TGFB1,ATP5MJ	12/86
2_Member	GO Biological Processes	GO:0009142	nucleoside triphosphate biosynthetic process	-12.2349	-9.43043	4538,4694,4696,4701,4706,4713,4714,4725,4731,4833,6392,7040,9556	ND4,NDUFA1,NDUFA3,NDUFA7,NDUFAB1,NDUFB7,NDUFB8,NDUFS5,NDUFV3,NME4,SDHD,TGFB1,ATP5MJ	13/114
2_Member	GO Biological Processes	GO:0015986	proton motive force-driven ATP synthesis	-11.7957	-9.00342	4538,4694,4696,4701,4706,4713,4714,4725,4731,6392,9556	ND4,NDUFA1,NDUFA3,NDUFA7,NDUFAB1,NDUFB7,NDUFB8,NDUFS5,NDUFV3,SDHD,ATP5MJ	11/73
2_Member	KEGG Pathway	hsa05020	Prion disease	-11.4925	-8.72371	1345,1349,1350,4512,4513,4514,4538,4694,4696,4701,4706,4713,4714,4725,4731,5621,6392	COX6C,COX7B,COX7C,COX1,COX2,COX3,ND4,NDUFA1,NDUFA3,NDUFA7,NDUFAB1,NDUFB7,NDUFB8,NDUFS5,NDUFV3,PRNP,SDHD	17/273
2_Member	GO Biological Processes	GO:0009205	purine ribonucleoside triphosphate metabolic process	-10.9618	-8.23647	4538,4694,4696,4701,4706,4713,4714,4725,4731,4833,6392,7040,9556	ND4,NDUFA1,NDUFA3,NDUFA7,NDUFAB1,NDUFB7,NDUFB8,NDUFS5,NDUFV3,NME4,SDHD,TGFB1,ATP5MJ	13/143
2_Member	GO Biological Processes	GO:0042776	proton motive force-driven mitochondrial ATP synthesis	-10.9357	-8.22059	4538,4694,4696,4701,4706,4713,4714,4725,4731,6392	ND4,NDUFA1,NDUFA3,NDUFA7,NDUFAB1,NDUFB7,NDUFB8,NDUFS5,NDUFV3,SDHD	10/64
2_Member	GO Biological Processes	GO:0006120	mitochondrial electron transport, NADH to ubiquinone	-10.8235	-8.12812	4538,4694,4696,4701,4706,4713,4714,4725,4731	ND4,NDUFA1,NDUFA3,NDUFA7,NDUFAB1,NDUFB7,NDUFB8,NDUFS5,NDUFV3	9/46
2_Member	GO Biological Processes	GO:0009144	purine nucleoside triphosphate metabolic process	-10.7715	-8.10417	4538,4694,4696,4701,4706,4713,4714,4725,4731,4833,6392,7040,9556	ND4,NDUFA1,NDUFA3,NDUFA7,NDUFAB1,NDUFB7,NDUFB8,NDUFS5,NDUFV3,NME4,SDHD,TGFB1,ATP5MJ	13/148
2_Member	GO Biological Processes	GO:0046034	ATP metabolic process	-10.7371	-8.07875	4538,4694,4696,4701,4706,4713,4714,4725,4731,6392,7040,9556	ND4,NDUFA1,NDUFA3,NDUFA7,NDUFAB1,NDUFB7,NDUFB8,NDUFS5,NDUFV3,SDHD,TGFB1,ATP5MJ	12/118
2_Member	KEGG Pathway	hsa05016	Huntington disease	-10.7064	-8.05678	1345,1349,1350,4512,4513,4514,4538,4694,4696,4701,4706,4713,4714,4725,4731,6392,6908	COX6C,COX7B,COX7C,COX1,COX2,COX3,ND4,NDUFA1,NDUFA3,NDUFA7,NDUFAB1,NDUFB7,NDUFB8,NDUFS5,NDUFV3,SDHD,TBP	17/306
2_Member	GO Biological Processes	GO:0009199	ribonucleoside triphosphate metabolic process	-10.6974	-8.05638	4538,4694,4696,4701,4706,4713,4714,4725,4731,4833,6392,7040,9556	ND4,NDUFA1,NDUFA3,NDUFA7,NDUFAB1,NDUFB7,NDUFB8,NDUFS5,NDUFV3,NME4,SDHD,TGFB1,ATP5MJ	13/150
2_Member	KEGG Pathway	hsa05012	Parkinson disease	-10.619	-7.98642	1345,1349,1350,4512,4513,4514,4538,4694,4696,4701,4706,4713,4714,4725,4731,6392	COX6C,COX7B,COX7C,COX1,COX2,COX3,ND4,NDUFA1,NDUFA3,NDUFA7,NDUFAB1,NDUFB7,NDUFB8,NDUFS5,NDUFV3,SDHD	16/266
2_Member	GO Biological Processes	GO:0006164	purine nucleotide biosynthetic process	-10.5089	-7.88463	4538,4694,4696,4701,4706,4713,4714,4725,4731,4833,6392,7040,9556,23417,83666	ND4,NDUFA1,NDUFA3,NDUFA7,NDUFAB1,NDUFB7,NDUFB8,NDUFS5,NDUFV3,NME4,SDHD,TGFB1,ATP5MJ,MLYCD,PARP9	15/229
2_Member	GO Biological Processes	GO:0009152	purine ribonucleotide biosynthetic process	-10.403	-7.79478	4538,4694,4696,4701,4706,4713,4714,4725,4731,4833,6392,7040,9556,23417	ND4,NDUFA1,NDUFA3,NDUFA7,NDUFAB1,NDUFB7,NDUFB8,NDUFS5,NDUFV3,NME4,SDHD,TGFB1,ATP5MJ,MLYCD	14/194
2_Member	GO Biological Processes	GO:0006163	purine nucleotide metabolic process	-10.3658	-7.76546	4538,4694,4696,4701,4706,4713,4714,4725,4731,4833,5091,6392,7040,9556,10840,10965,23417,83666,160428	ND4,NDUFA1,NDUFA3,NDUFA7,NDUFAB1,NDUFB7,NDUFB8,NDUFS5,NDUFV3,NME4,PC,SDHD,TGFB1,ATP5MJ,ALDH1L1,ACOT2,MLYCD,PARP9,ALDH1L2	19/420
2_Member	GO Biological Processes	GO:0072522	purine-containing compound biosynthetic process	-10.272	-7.68684	4538,4694,4696,4701,4706,4713,4714,4725,4731,4833,6392,7040,9556,23417,83666	ND4,NDUFA1,NDUFA3,NDUFA7,NDUFAB1,NDUFB7,NDUFB8,NDUFS5,NDUFV3,NME4,SDHD,TGFB1,ATP5MJ,MLYCD,PARP9	15/238
2_Member	GO Biological Processes	GO:0090407	organophosphate biosynthetic process	-10.1753	-7.61209	4538,4694,4696,4701,4706,4713,4714,4725,4731,4833,5337,6392,7040,9556,10162,10554,23417,23556,54965,57153,83666	ND4,NDUFA1,NDUFA3,NDUFA7,NDUFAB1,NDUFB7,NDUFB8,NDUFS5,NDUFV3,NME4,PLD1,SDHD,TGFB1,ATP5MJ,LPCAT3,AGPAT1,MLYCD,PIGN,PIGX,SLC44A2,PARP9	21/541
2_Member	GO Biological Processes	GO:0009141	nucleoside triphosphate metabolic process	-10.1086	-7.5662	4538,4694,4696,4701,4706,4713,4714,4725,4731,4833,6392,7040,9556	ND4,NDUFA1,NDUFA3,NDUFA7,NDUFAB1,NDUFB7,NDUFB8,NDUFS5,NDUFV3,NME4,SDHD,TGFB1,ATP5MJ	13/167
2_Member	WikiPathways	WP4324	Mitochondrial complex I assembly model OXPHOS system	-10.0103	-7.48782	4538,4694,4696,4701,4706,4713,4714,4725,4731	ND4,NDUFA1,NDUFA3,NDUFA7,NDUFAB1,NDUFB7,NDUFB8,NDUFS5,NDUFV3	9/56
2_Member	GO Biological Processes	GO:0009260	ribonucleotide biosynthetic process	-9.99924	-7.48319	4538,4694,4696,4701,4706,4713,4714,4725,4731,4833,6392,7040,9556,23417	ND4,NDUFA1,NDUFA3,NDUFA7,NDUFAB1,NDUFB7,NDUFB8,NDUFS5,NDUFV3,NME4,SDHD,TGFB1,ATP5MJ,MLYCD	14/208
2_Member	Reactome Gene Sets	R-HSA-6799198	Complex I biogenesis	-9.93809	-7.42838	4538,4694,4696,4701,4706,4713,4714,4725,4731	ND4,NDUFA1,NDUFA3,NDUFA7,NDUFAB1,NDUFB7,NDUFB8,NDUFS5,NDUFV3	9/57
2_Member	GO Biological Processes	GO:0072521	purine-containing compound metabolic process	-9.85756	-7.36026	4538,4694,4696,4701,4706,4713,4714,4725,4731,4833,5091,6392,7040,9556,10840,10965,23417,83666,160428	ND4,NDUFA1,NDUFA3,NDUFA7,NDUFAB1,NDUFB7,NDUFB8,NDUFS5,NDUFV3,NME4,PC,SDHD,TGFB1,ATP5MJ,ALDH1L1,ACOT2,MLYCD,PARP9,ALDH1L2	19/450
2_Member	GO Biological Processes	GO:0046390	ribose phosphate biosynthetic process	-9.80867	-7.32343	4538,4694,4696,4701,4706,4713,4714,4725,4731,4833,6392,7040,9556,23417	ND4,NDUFA1,NDUFA3,NDUFA7,NDUFAB1,NDUFB7,NDUFB8,NDUFS5,NDUFV3,NME4,SDHD,TGFB1,ATP5MJ,MLYCD	14/215
2_Member	GO Biological Processes	GO:0009165	nucleotide biosynthetic process	-9.66356	-7.19581	4538,4694,4696,4701,4706,4713,4714,4725,4731,4833,6392,7040,9556,23417,83666	ND4,NDUFA1,NDUFA3,NDUFA7,NDUFAB1,NDUFB7,NDUFB8,NDUFS5,NDUFV3,NME4,SDHD,TGFB1,ATP5MJ,MLYCD,PARP9	15/263
2_Member	GO Biological Processes	GO:1901293	nucleoside phosphate biosynthetic process	-9.61774	-7.15568	4538,4694,4696,4701,4706,4713,4714,4725,4731,4833,6392,7040,9556,23417,83666	ND4,NDUFA1,NDUFA3,NDUFA7,NDUFAB1,NDUFB7,NDUFB8,NDUFS5,NDUFV3,NME4,SDHD,TGFB1,ATP5MJ,MLYCD,PARP9	15/265
2_Member	GO Biological Processes	GO:0009117	nucleotide metabolic process	-9.41785	-6.96692	4538,4694,4696,4701,4706,4713,4714,4725,4731,4833,5091,6392,7040,9556,10840,10965,23417,83666,160428	ND4,NDUFA1,NDUFA3,NDUFA7,NDUFAB1,NDUFB7,NDUFB8,NDUFS5,NDUFV3,NME4,PC,SDHD,TGFB1,ATP5MJ,ALDH1L1,ACOT2,MLYCD,PARP9,ALDH1L2	19/478
2_Member	CORUM	CORUM:178	Respiratory chain complex I (holoenzyme), mitochondrial	-9.40756	-6.96209	4694,4696,4701,4706,4713,4714,4725,4731	NDUFA1,NDUFA3,NDUFA7,NDUFAB1,NDUFB7,NDUFB8,NDUFS5,NDUFV3	8/44
2_Member	GO Biological Processes	GO:0006753	nucleoside phosphate metabolic process	-9.28294	-6.8482	4538,4694,4696,4701,4706,4713,4714,4725,4731,4833,5091,6392,7040,9556,10840,10965,23417,83666,160428	ND4,NDUFA1,NDUFA3,NDUFA7,NDUFAB1,NDUFB7,NDUFB8,NDUFS5,NDUFV3,NME4,PC,SDHD,TGFB1,ATP5MJ,ALDH1L1,ACOT2,MLYCD,PARP9,ALDH1L2	19/487
2_Member	KEGG Pathway	hsa05010	Alzheimer disease	-9.18022	-6.75595	1345,1349,1350,4023,4512,4513,4514,4538,4694,4696,4701,4706,4713,4714,4725,4731,6392	COX6C,COX7B,COX7C,LPL,COX1,COX2,COX3,ND4,NDUFA1,NDUFA3,NDUFA7,NDUFAB1,NDUFB7,NDUFB8,NDUFS5,NDUFV3,SDHD	17/384
2_Member	GO Biological Processes	GO:0055086	nucleobase-containing small molecule metabolic process	-9.14962	-6.73556	2530,4538,4694,4696,4701,4706,4713,4714,4725,4731,4833,5091,6392,7040,9556,10840,10965,23417,83666,160428	FUT8,ND4,NDUFA1,NDUFA3,NDUFA7,NDUFAB1,NDUFB7,NDUFB8,NDUFS5,NDUFV3,NME4,PC,SDHD,TGFB1,ATP5MJ,ALDH1L1,ACOT2,MLYCD,PARP9,ALDH1L2	20/555
2_Member	KEGG Pathway	hsa05014	Amyotrophic lateral sclerosis	-8.62475	-6.24468	1345,1349,1350,4512,4513,4514,4538,4694,4696,4701,4706,4713,4714,4725,4731,6392	COX6C,COX7B,COX7C,COX1,COX2,COX3,ND4,NDUFA1,NDUFA3,NDUFA7,NDUFAB1,NDUFB7,NDUFB8,NDUFS5,NDUFV3,SDHD	16/364
2_Member	WikiPathways	WP623	Oxidative phosphorylation	-8.28654	-5.93361	4538,4696,4701,4706,4713,4714,4725,4731	ND4,NDUFA3,NDUFA7,NDUFAB1,NDUFB7,NDUFB8,NDUFS5,NDUFV3	8/60
2_Member	GO Biological Processes	GO:0009150	purine ribonucleotide metabolic process	-8.12163	-5.77307	4538,4694,4696,4701,4706,4713,4714,4725,4731,4833,6392,7040,9556,10965,23417	ND4,NDUFA1,NDUFA3,NDUFA7,NDUFAB1,NDUFB7,NDUFB8,NDUFS5,NDUFV3,NME4,SDHD,TGFB1,ATP5MJ,ACOT2,MLYCD	15/341
2_Member	GO Biological Processes	GO:0009259	ribonucleotide metabolic process	-7.80769	-5.49656	4538,4694,4696,4701,4706,4713,4714,4725,4731,4833,6392,7040,9556,10965,23417	ND4,NDUFA1,NDUFA3,NDUFA7,NDUFAB1,NDUFB7,NDUFB8,NDUFS5,NDUFV3,NME4,SDHD,TGFB1,ATP5MJ,ACOT2,MLYCD	15/360
2_Member	KEGG Pathway	hsa05022	Pathways of neurodegeneration - multiple diseases	-7.78917	-5.482	1345,1349,1350,4512,4513,4514,4538,4694,4696,4701,4706,4713,4714,4725,4731,5621,6392	COX6C,COX7B,COX7C,COX1,COX2,COX3,ND4,NDUFA1,NDUFA3,NDUFA7,NDUFAB1,NDUFB7,NDUFB8,NDUFS5,NDUFV3,PRNP,SDHD	17/476
2_Member	GO Biological Processes	GO:0033108	mitochondrial respiratory chain complex assembly	-7.67882	-5.37948	4538,4694,4696,4706,4713,4714,4725,28958,493753	ND4,NDUFA1,NDUFA3,NDUFAB1,NDUFB7,NDUFB8,NDUFS5,COA3,COA5	9/101
2_Member	GO Biological Processes	GO:0019693	ribose phosphate metabolic process	-7.66571	-5.37477	4538,4694,4696,4701,4706,4713,4714,4725,4731,4833,6392,7040,9556,10965,23417	ND4,NDUFA1,NDUFA3,NDUFA7,NDUFAB1,NDUFB7,NDUFB8,NDUFS5,NDUFV3,NME4,SDHD,TGFB1,ATP5MJ,ACOT2,MLYCD	15/369
2_Member	GO Biological Processes	GO:0010257	NADH dehydrogenase complex assembly	-6.90465	-4.646	4538,4694,4696,4706,4713,4714,4725	ND4,NDUFA1,NDUFA3,NDUFAB1,NDUFB7,NDUFB8,NDUFS5	7/60
2_Member	GO Biological Processes	GO:0032981	mitochondrial respiratory chain complex I assembly	-6.90465	-4.646	4538,4694,4696,4706,4713,4714,4725	ND4,NDUFA1,NDUFA3,NDUFAB1,NDUFB7,NDUFB8,NDUFS5	7/60
2_Member	KEGG Pathway	hsa04723	Retrograde endocannabinoid signaling	-6.24729	-4.04486	4538,4694,4696,4701,4706,4713,4714,4725,4731	ND4,NDUFA1,NDUFA3,NDUFA7,NDUFAB1,NDUFB7,NDUFB8,NDUFS5,NDUFV3	9/148
2_Member	CORUM	CORUM:2914	Respiratory chain complex I (beta subunit) mitochondrial	-5.53326	-3.39153	4538,4706,4713,4714	ND4,NDUFAB1,NDUFB7,NDUFB8	4/16
2_Member	CORUM	CORUM:2919	Respiratory chain complex I (gamma subunit) mitochondrial	-4.13623	-2.17683	4694,4696,4725	NDUFA1,NDUFA3,NDUFS5	3/13
2_Member	GO Biological Processes	GO:0007005	mitochondrion organization	-3.72557	-1.82262	4538,4694,4696,4706,4713,4714,4725,11232,28958,51566,493753	ND4,NDUFA1,NDUFA3,NDUFAB1,NDUFB7,NDUFB8,NDUFS5,POLG2,COA3,ARMCX3,COA5	11/451
3_Summary	GO Biological Processes	GO:0010810	regulation of cell-substrate adhesion	-12.9467	-10.0453	1012,1295,1307,2192,2199,2335,4811,5054,5340,7057,7070,8829,10630,11117,26585,30008,255743,567,960,975,3105,6604,84034,1490,2530,5341,5764,2239	CDH13,COL8A1,COL16A1,FBLN1,FBLN2,FN1,NID1,SERPINE1,PLG,THBS1,THY1,NRP1,PDPN,EMILIN1,GREM1,EFEMP2,NPNT,B2M,CD44,CD81,HLA-A,SMARCD3,EMILIN2,CCN2,FUT8,PLEK,PTN,GPC4	28/-
3_Member	GO Biological Processes	GO:0010810	regulation of cell-substrate adhesion	-12.9467	-10.0453	1012,1295,1307,2192,2199,2335,4811,5054,5340,7057,7070,8829,10630,11117,26585,30008,255743	CDH13,COL8A1,COL16A1,FBLN1,FBLN2,FN1,NID1,SERPINE1,PLG,THBS1,THY1,NRP1,PDPN,EMILIN1,GREM1,EFEMP2,NPNT	17/222
3_Member	GO Biological Processes	GO:0010811	positive regulation of cell-substrate adhesion	-9.20568	-6.7762	1012,1295,1307,2199,2335,4811,7070,8829,11117,30008,255743	CDH13,COL8A1,COL16A1,FBLN2,FN1,NID1,THY1,NRP1,EMILIN1,EFEMP2,NPNT	11/125
3_Member	GO Biological Processes	GO:0045785	positive regulation of cell adhesion	-8.52047	-6.14504	567,960,975,1012,1295,1307,2199,2335,3105,4811,6604,7070,8829,10630,11117,30008,84034,255743	B2M,CD44,CD81,CDH13,COL8A1,COL16A1,FBLN2,FN1,HLA-A,NID1,SMARCD3,THY1,NRP1,PDPN,EMILIN1,EFEMP2,EMILIN2,NPNT	18/482
3_Member	GO Biological Processes	GO:0007229	integrin-mediated signaling pathway	-6.72959	-4.4814	1307,1490,2335,2530,5341,5764,7070,8829	COL16A1,CCN2,FN1,FUT8,PLEK,PTN,THY1,NRP1	8/94
3_Member	GO Biological Processes	GO:0001952	regulation of cell-matrix adhesion	-5.77996	-3.61892	1012,1307,5054,7057,7070,8829,26585,30008	CDH13,COL16A1,SERPINE1,THBS1,THY1,NRP1,GREM1,EFEMP2	8/125
3_Member	GO Biological Processes	GO:0031589	cell-substrate adhesion	-4.52867	-2.51053	960,1490,2335,4811,7070,8829,11117,255743	CD44,CCN2,FN1,NID1,THY1,NRP1,EMILIN1,NPNT	8/185
3_Member	GO Biological Processes	GO:0007160	cell-matrix adhesion	-4.50728	-2.49842	960,1490,2335,4811,7070,11117,255743	CD44,CCN2,FN1,NID1,THY1,EMILIN1,NPNT	7/136
3_Member	GO Biological Processes	GO:0001954	positive regulation of cell-matrix adhesion	-4.49858	-2.49245	1012,1307,7070,8829,30008	CDH13,COL16A1,THY1,NRP1,EFEMP2	5/56
3_Member	GO Biological Processes	GO:0051893	regulation of focal adhesion assembly	-4.21662	-2.24464	1307,7057,7070,8829,26585	COL16A1,THBS1,THY1,NRP1,GREM1	5/64
3_Member	GO Biological Processes	GO:0090109	regulation of cell-substrate junction assembly	-4.21662	-2.24464	1307,7057,7070,8829,26585	COL16A1,THBS1,THY1,NRP1,GREM1	5/64
3_Member	GO Biological Processes	GO:0150116	regulation of cell-substrate junction organization	-4.05949	-2.10363	1307,7057,7070,8829,26585	COL16A1,THBS1,THY1,NRP1,GREM1	5/69
3_Member	GO Biological Processes	GO:0051894	positive regulation of focal adhesion assembly	-3.20458	-1.38622	1307,7070,8829	COL16A1,THY1,NRP1	3/26
3_Member	GO Biological Processes	GO:0150117	positive regulation of cell-substrate junction organization	-2.97716	-1.20495	1307,7070,8829	COL16A1,THY1,NRP1	3/31
3_Member	GO Biological Processes	GO:1901888	regulation of cell junction assembly	-2.55231	-0.876768	1307,2239,7057,7070,8829,26585	COL16A1,GPC4,THBS1,THY1,NRP1,GREM1	6/214
4_Summary	GO Biological Processes	GO:0030198	extracellular matrix organization	-12.5904	-9.73322	649,1295,1307,1490,2192,4017,4811,5340,7040,7045,7092,11117,26585,30008,57326,80781,84171,255743,26577,2147,2162,5054,5654,58,567,1264,1674,4053,2239,2817,5764,6383,64388	BMP1,COL8A1,COL16A1,CCN2,FBLN1,LOXL2,NID1,PLG,TGFB1,TGFBI,TLL1,EMILIN1,GREM1,EFEMP2,PBXIP1,COL18A1,LOXL4,NPNT,PCOLCE2,F2,F13A1,SERPINE1,HTRA1,ACTA1,B2M,CNN1,DES,LTBP2,GPC4,GPC1,PTN,SDC2,GREM2	33/-
4_Member	GO Biological Processes	GO:0030198	extracellular matrix organization	-12.5904	-9.73322	649,1295,1307,1490,2192,4017,4811,5340,7040,7045,7092,11117,26585,30008,57326,80781,84171,255743	BMP1,COL8A1,COL16A1,CCN2,FBLN1,LOXL2,NID1,PLG,TGFB1,TGFBI,TLL1,EMILIN1,GREM1,EFEMP2,PBXIP1,COL18A1,LOXL4,NPNT	18/272
4_Member	GO Biological Processes	GO:0043062	extracellular structure organization	-12.5632	-9.71982	649,1295,1307,1490,2192,4017,4811,5340,7040,7045,7092,11117,26585,30008,57326,80781,84171,255743	BMP1,COL8A1,COL16A1,CCN2,FBLN1,LOXL2,NID1,PLG,TGFB1,TGFBI,TLL1,EMILIN1,GREM1,EFEMP2,PBXIP1,COL18A1,LOXL4,NPNT	18/273
4_Member	GO Biological Processes	GO:0045229	external encapsulating structure organization	-12.5092	-9.67915	649,1295,1307,1490,2192,4017,4811,5340,7040,7045,7092,11117,26585,30008,57326,80781,84171,255743	BMP1,COL8A1,COL16A1,CCN2,FBLN1,LOXL2,NID1,PLG,TGFB1,TGFBI,TLL1,EMILIN1,GREM1,EFEMP2,PBXIP1,COL18A1,LOXL4,NPNT	18/275
4_Member	WikiPathways	WP3874	Canonical and non-canonical TGF-B signaling	-7.20004	-4.91966	649,4017,7040,26585,84171	BMP1,LOXL2,TGFB1,GREM1,LOXL4	5/17
4_Member	Reactome Gene Sets	R-HSA-1474290	Collagen formation	-6.87716	-4.62202	649,1295,1307,4017,7092,26577,80781,84171	BMP1,COL8A1,COL16A1,LOXL2,TLL1,PCOLCE2,COL18A1,LOXL4	8/90
4_Member	GO Biological Processes	GO:0030199	collagen fibril organization	-5.67814	-3.52823	649,4017,7092,26585,80781,84171	BMP1,LOXL2,TLL1,GREM1,COL18A1,LOXL4	6/58
4_Member	Reactome Gene Sets	R-HSA-2022090	Assembly of collagen fibrils and other multimeric structures	-5.54784	-3.4034	649,1295,4017,7092,80781,84171	BMP1,COL8A1,LOXL2,TLL1,COL18A1,LOXL4	6/61
4_Member	Reactome Gene Sets	R-HSA-2243919	Crosslinking of collagen fibrils	-5.31202	-3.19135	649,4017,7092,84171	BMP1,LOXL2,TLL1,LOXL4	4/18
4_Member	Reactome Gene Sets	R-HSA-1650814	Collagen biosynthesis and modifying enzymes	-5.30722	-3.18911	649,1295,1307,7092,26577,80781	BMP1,COL8A1,COL16A1,TLL1,PCOLCE2,COL18A1	6/67
4_Member	Canonical Pathways	M3468	NABA ECM REGULATORS	-4.56612	-2.54185	649,2147,2162,4017,5054,5340,5654,7092,84171	BMP1,F2,F13A1,LOXL2,SERPINE1,PLG,HTRA1,TLL1,LOXL4	9/238
4_Member	GO Biological Processes	GO:0097435	supramolecular fiber organization	-4.02233	-2.07689	58,567,649,1264,1674,4017,4053,7092,11117,26585,30008,80781,84171	ACTA1,B2M,BMP1,CNN1,DES,LOXL2,LTBP2,TLL1,EMILIN1,GREM1,EFEMP2,COL18A1,LOXL4	13/569
4_Member	Canonical Pathways	M5885	NABA MATRISOME ASSOCIATED	-3.90822	-1.97128	649,2147,2162,2239,2817,4017,5054,5340,5654,5764,6383,7040,7092,26585,84171	BMP1,F2,F13A1,GPC4,GPC1,LOXL2,SERPINE1,PLG,HTRA1,PTN,SDC2,TGFB1,TLL1,GREM1,LOXL4	15/751
4_Member	GO Biological Processes	GO:0009953	dorsal/ventral pattern formation	-2.6382	-0.945738	649,7092,26585,64388	BMP1,TLL1,GREM1,GREM2	4/85
5_Summary	GO Biological Processes	GO:0009611	response to wounding	-11.6326	-8.85221	350,958,960,1490,2147,2152,2153,2162,2192,2335,3162,3371,5340,5341,5627,7040,7070,8829,10630,29071,646960,5054,7057,11117,84034,4513,3920,3959,5764,8840,65078,2817,5593,6383,7102,6948,2040,5091	APOH,CD40,CD44,CCN2,F2,F3,F5,F13A1,FBLN1,FN1,HMOX1,TNC,PLG,PLEK,PROS1,TGFB1,THY1,NRP1,PDPN,C1GALT1C1,PRSS56,SERPINE1,THBS1,EMILIN1,EMILIN2,COX2,LAMP2,LGALS3BP,PTN,CCN4,RTN4R,GPC1,PRKG2,SDC2,TSPAN7,TCN2,STOM,PC	38/-
5_Member	GO Biological Processes	GO:0009611	response to wounding	-11.6326	-8.85221	350,958,960,1490,2147,2152,2153,2162,2192,2335,3162,3371,5340,5341,5627,7040,7070,8829,10630,29071,646960	APOH,CD40,CD44,CCN2,F2,F3,F5,F13A1,FBLN1,FN1,HMOX1,TNC,PLG,PLEK,PROS1,TGFB1,THY1,NRP1,PDPN,C1GALT1C1,PRSS56	21/452
5_Member	GO Biological Processes	GO:0030194	positive regulation of blood coagulation	-11.1251	-8.37864	350,2147,2152,5054,5340,7057,11117,84034	APOH,F2,F3,SERPINE1,PLG,THBS1,EMILIN1,EMILIN2	8/28
5_Member	GO Biological Processes	GO:1900048	positive regulation of hemostasis	-11.1251	-8.37864	350,2147,2152,5054,5340,7057,11117,84034	APOH,F2,F3,SERPINE1,PLG,THBS1,EMILIN1,EMILIN2	8/28
5_Member	GO Biological Processes	GO:0050820	positive regulation of coagulation	-10.8551	-8.14996	350,2147,2152,5054,5340,7057,11117,84034	APOH,F2,F3,SERPINE1,PLG,THBS1,EMILIN1,EMILIN2	8/30
5_Member	GO Biological Processes	GO:0050878	regulation of body fluid levels	-10.7736	-8.10417	350,958,2147,2152,2153,2162,2192,4513,5054,5340,5341,5627,7057,10630,11117,29071,84034,646960	APOH,CD40,F2,F3,F5,F13A1,FBLN1,COX2,SERPINE1,PLG,PLEK,PROS1,THBS1,PDPN,EMILIN1,C1GALT1C1,EMILIN2,PRSS56	18/349
5_Member	Reactome Gene Sets	R-HSA-114608	Platelet degranulation	-10.2774	-7.68684	350,2153,2162,2335,3920,3959,5054,5340,5341,5627,7040,7057	APOH,F5,F13A1,FN1,LAMP2,LGALS3BP,SERPINE1,PLG,PLEK,PROS1,TGFB1,THBS1	12/129
5_Member	GO Biological Processes	GO:1903036	positive regulation of response to wounding	-10.1654	-7.60926	350,2147,2152,5054,5340,5764,7057,8840,11117,84034	APOH,F2,F3,SERPINE1,PLG,PTN,THBS1,CCN4,EMILIN1,EMILIN2	10/76
5_Member	GO Biological Processes	GO:0042060	wound healing	-10.1116	-7.5662	350,958,960,2147,2152,2153,2162,2192,2335,3162,5340,5341,5627,7040,10630,29071,646960	APOH,CD40,CD44,F2,F3,F5,F13A1,FBLN1,FN1,HMOX1,PLG,PLEK,PROS1,TGFB1,PDPN,C1GALT1C1,PRSS56	17/334
5_Member	Reactome Gene Sets	R-HSA-76005	Response to elevated platelet cytosolic Ca2+	-10.0827	-7.54701	350,2153,2162,2335,3920,3959,5054,5340,5341,5627,7040,7057	APOH,F5,F13A1,FN1,LAMP2,LGALS3BP,SERPINE1,PLG,PLEK,PROS1,TGFB1,THBS1	12/134
5_Member	GO Biological Processes	GO:0007596	blood coagulation	-9.88531	-7.38185	350,958,2147,2152,2153,2162,2192,5340,5341,5627,10630,29071,646960	APOH,CD40,F2,F3,F5,F13A1,FBLN1,PLG,PLEK,PROS1,PDPN,C1GALT1C1,PRSS56	13/174
5_Member	GO Biological Processes	GO:0050817	coagulation	-9.82335	-7.33213	350,958,2147,2152,2153,2162,2192,5340,5341,5627,10630,29071,646960	APOH,CD40,F2,F3,F5,F13A1,FBLN1,PLG,PLEK,PROS1,PDPN,C1GALT1C1,PRSS56	13/176
5_Member	GO Biological Processes	GO:0007599	hemostasis	-9.70178	-7.22245	350,958,2147,2152,2153,2162,2192,5340,5341,5627,10630,29071,646960	APOH,CD40,F2,F3,F5,F13A1,FBLN1,PLG,PLEK,PROS1,PDPN,C1GALT1C1,PRSS56	13/180
5_Member	GO Biological Processes	GO:0090303	positive regulation of wound healing	-9.59706	-7.1406	350,2147,2152,5054,5340,7057,8840,11117,84034	APOH,F2,F3,SERPINE1,PLG,THBS1,CCN4,EMILIN1,EMILIN2	9/62
5_Member	GO Biological Processes	GO:0030193	regulation of blood coagulation	-9.16784	-6.7487	350,2147,2152,5054,5340,5627,7057,11117,84034	APOH,F2,F3,SERPINE1,PLG,PROS1,THBS1,EMILIN1,EMILIN2	9/69
5_Member	GO Biological Processes	GO:1900046	regulation of hemostasis	-9.05405	-6.64501	350,2147,2152,5054,5340,5627,7057,11117,84034	APOH,F2,F3,SERPINE1,PLG,PROS1,THBS1,EMILIN1,EMILIN2	9/71
5_Member	GO Biological Processes	GO:0050818	regulation of coagulation	-8.88986	-6.48578	350,2147,2152,5054,5340,5627,7057,11117,84034	APOH,F2,F3,SERPINE1,PLG,PROS1,THBS1,EMILIN1,EMILIN2	9/74
5_Member	GO Biological Processes	GO:1903034	regulation of response to wounding	-8.7959	-6.39673	350,2147,2152,5054,5340,5627,5764,7057,8840,11117,65078,84034	APOH,F2,F3,SERPINE1,PLG,PROS1,PTN,THBS1,CCN4,EMILIN1,RTN4R,EMILIN2	12/173
5_Member	Reactome Gene Sets	R-HSA-76002	Platelet activation, signaling and aggregation	-8.66611	-6.27659	350,2147,2153,2162,2335,3920,3959,5054,5340,5341,5627,7040,7057,10630	APOH,F2,F5,F13A1,FN1,LAMP2,LGALS3BP,SERPINE1,PLG,PLEK,PROS1,TGFB1,THBS1,PDPN	14/263
5_Member	Reactome Gene Sets	R-HSA-109582	Hemostasis	-8.31841	-5.95213	350,960,2147,2152,2153,2162,2335,2817,3920,3959,5054,5340,5341,5593,5627,6383,7040,7057,7102,10630	APOH,CD44,F2,F3,F5,F13A1,FN1,GPC1,LAMP2,LGALS3BP,SERPINE1,PLG,PLEK,PRKG2,PROS1,SDC2,TGFB1,THBS1,TSPAN7,PDPN	20/621
5_Member	GO Biological Processes	GO:0051918	negative regulation of fibrinolysis	-7.87285	-5.55772	350,2147,5054,5340,7057	APOH,F2,SERPINE1,PLG,THBS1	5/13
5_Member	GO Biological Processes	GO:0061041	regulation of wound healing	-7.66264	-5.37477	350,2147,2152,5054,5340,5627,7057,8840,11117,84034	APOH,F2,F3,SERPINE1,PLG,PROS1,THBS1,CCN4,EMILIN1,EMILIN2	10/136
5_Member	GO Biological Processes	GO:0051917	regulation of fibrinolysis	-7.061	-4.78432	350,2147,5054,5340,7057	APOH,F2,SERPINE1,PLG,THBS1	5/18
5_Member	WikiPathways	WP272	Blood clotting cascade	-6.58251	-4.34116	2147,2152,2153,5054,5340	F2,F3,F5,SERPINE1,PLG	5/22
5_Member	KEGG Pathway	hsa04610	Complement and coagulation cascades	-5.82292	-3.64755	2147,2152,2153,2162,5054,5340,5627	F2,F3,F5,F13A1,SERPINE1,PLG,PROS1	7/86
5_Member	Canonical Pathways	M165	PID SYNDECAN 4 PATHWAY	-5.72188	-3.56644	2147,2335,3371,5340,7057	F2,FN1,TNC,PLG,THBS1	5/32
5_Member	WikiPathways	WP558	Complement and coagulation cascades	-5.67814	-3.52823	2147,2152,2153,5054,5340,5627	F2,F3,F5,SERPINE1,PLG,PROS1	6/58
5_Member	Reactome Gene Sets	R-HSA-140877	Formation of Fibrin Clot (Clotting Cascade)	-5.28163	-3.16607	2147,2152,2153,2162,5627	F2,F3,F5,F13A1,PROS1	5/39
5_Member	GO Biological Processes	GO:0042730	fibrinolysis	-5.21157	-3.10356	2147,5054,5340,5627	F2,SERPINE1,PLG,PROS1	4/19
5_Member	WikiPathways	WP4927	COVID-19, thrombosis and anticoagulation	-5.03605	-2.94756	2147,2162,5340	F2,F13A1,PLG	3/7
5_Member	GO Biological Processes	GO:0030195	negative regulation of blood coagulation	-4.96857	-2.88246	350,2147,5054,5340,5627	APOH,F2,SERPINE1,PLG,PROS1	5/45
5_Member	Reactome Gene Sets	R-HSA-140875	Common Pathway of Fibrin Clot Formation	-4.94235	-2.86097	2147,2153,2162,5627	F2,F5,F13A1,PROS1	4/22
5_Member	GO Biological Processes	GO:1900047	negative regulation of hemostasis	-4.92088	-2.84648	350,2147,5054,5340,5627	APOH,F2,SERPINE1,PLG,PROS1	5/46
5_Member	GO Biological Processes	GO:0050819	negative regulation of coagulation	-4.78435	-2.7236	350,2147,5054,5340,5627	APOH,F2,SERPINE1,PLG,PROS1	5/49
5_Member	GO Biological Processes	GO:1903035	negative regulation of response to wounding	-4.48482	-2.48065	350,2147,5054,5340,5627,65078	APOH,F2,SERPINE1,PLG,PROS1,RTN4R	6/93
5_Member	GO Biological Processes	GO:0061045	negative regulation of wound healing	-3.94261	-2.00399	350,2147,5054,5340,5627	APOH,F2,SERPINE1,PLG,PROS1	5/73
5_Member	WikiPathways	WP1533	Vitamin B12 metabolism	-3.47254	-1.59966	2147,5054,5340,6948	F2,SERPINE1,PLG,TCN2	4/51
5_Member	GO Biological Processes	GO:0051702	biological process involved in interaction with symbiont	-2.97826	-1.20495	2040,2147,2335,5091,5340	STOM,F2,FN1,PC,PLG	5/118
5_Member	Canonical Pathways	M92	PID ANGIOPOIETIN RECEPTOR PATHWAY	-2.4016	-0.767375	2147,2335,5340	F2,FN1,PLG	3/49
6_Summary	Canonical Pathways	M18	PID INTEGRIN1 PATHWAY	-10.7966	-8.11084	975,2162,2200,2335,3371,4811,7045,7057,80781,255743,960,1295,1307,3339,7070,58,958,4052,11117	CD81,F13A1,FBN1,FN1,TNC,NID1,TGFBI,THBS1,COL18A1,NPNT,CD44,COL8A1,COL16A1,HSPG2,THY1,ACTA1,CD40,LTBP1,EMILIN1	19/-
6_Member	Canonical Pathways	M18	PID INTEGRIN1 PATHWAY	-10.7966	-8.11084	975,2162,2200,2335,3371,4811,7045,7057,80781,255743	CD81,F13A1,FBN1,FN1,TNC,NID1,TGFBI,THBS1,COL18A1,NPNT	10/66
6_Member	Reactome Gene Sets	R-HSA-216083	Integrin cell surface interactions	-8.34531	-5.97448	960,1295,1307,2200,2335,3339,3371,7057,80781	CD44,COL8A1,COL16A1,FBN1,FN1,HSPG2,TNC,THBS1,COL18A1	9/85
6_Member	Canonical Pathways	M53	PID INTEGRIN3 PATHWAY	-6.4652	-4.22723	2200,2335,3371,7045,7057,7070	FBN1,FN1,TNC,TGFBI,THBS1,THY1	6/43
6_Member	KEGG Pathway	hsa04512	ECM-receptor interaction	-4.62133	-2.58241	960,2335,3339,3371,7057,255743	CD44,FN1,HSPG2,TNC,THBS1,NPNT	6/88
6_Member	Canonical Pathways	M118	PID INTEGRIN A9B1 PATHWAY	-3.25575	-1.42446	2162,2335,3371	F13A1,FN1,TNC	3/25
6_Member	WikiPathways	WP5055	Burn wound healing	-3.06266	-1.2692	58,2162,2200,2335,3371	ACTA1,F13A1,FBN1,FN1,TNC	5/113
6_Member	WikiPathways	WP453	Inflammatory response pathway	-3.0193	-1.23894	958,2335,7057	CD40,FN1,THBS1	3/30
6_Member	Canonical Pathways	M277	PID INTEGRIN A4B1 PATHWAY	-2.89715	-1.14738	975,2335,7057	CD81,FN1,THBS1	3/33
6_Member	GO Biological Processes	GO:0018149	peptide cross-linking	-2.82224	-1.08753	2162,2335,7057	F13A1,FN1,THBS1	3/35
6_Member	GO Biological Processes	GO:0071634	regulation of transforming growth factor beta production	-2.62277	-0.933176	2335,4052,7057	FN1,LTBP1,THBS1	3/41
6_Member	GO Biological Processes	GO:1905521	regulation of macrophage migration	-2.53468	-0.86282	975,7057,11117	CD81,THBS1,EMILIN1	3/44
7_Summary	Reactome Gene Sets	R-HSA-381426	Regulation of Insulin-like Growth Factor (IGF) transport and uptake by Insulin-like Growth Factor Binding Proteins (IGFBPs)	-10.4394	-7.8232	2147,2153,2200,2335,3371,3490,4052,4240,5340,6383,11098,51280	F2,F5,FBN1,FN1,TNC,IGFBP7,LTBP1,MFGE8,PLG,SDC2,PRSS23,GOLM1	12/-
7_Member	Reactome Gene Sets	R-HSA-381426	Regulation of Insulin-like Growth Factor (IGF) transport and uptake by Insulin-like Growth Factor Binding Proteins (IGFBPs)	-10.4394	-7.8232	2147,2153,2200,2335,3371,3490,4052,4240,5340,6383,11098,51280	F2,F5,FBN1,FN1,TNC,IGFBP7,LTBP1,MFGE8,PLG,SDC2,PRSS23,GOLM1	12/125
7_Member	Reactome Gene Sets	R-HSA-8957275	Post-translational protein phosphorylation	-8.63507	-6.2503	2153,2200,2335,3371,3490,4052,4240,6383,11098,51280	F5,FBN1,FN1,TNC,IGFBP7,LTBP1,MFGE8,SDC2,PRSS23,GOLM1	10/108
8_Summary	GO Biological Processes	GO:0001944	vasculature development	-10.2495	-7.67176	1012,1295,1490,2321,2324,2335,3162,3339,4017,4240,5054,6444,7040,7045,7057,7070,8829,10630,11277,26585,30008,255743,958,2152,5764,8840,131578,646960,11117,84034,350,5797,567,5654,9104,684,2192,1264,754,960	CDH13,COL8A1,CCN2,FLT1,FLT4,FN1,HMOX1,HSPG2,LOXL2,MFGE8,SERPINE1,SGCD,TGFB1,TGFBI,THBS1,THY1,NRP1,PDPN,TREX1,GREM1,EFEMP2,NPNT,CD40,F3,PTN,CCN4,LRRC15,PRSS56,EMILIN1,EMILIN2,APOH,PTPRM,B2M,HTRA1,RGN,BST2,FBLN1,CNN1,PTTG1IP,CD44	40/-
8_Member	GO Biological Processes	GO:0001944	vasculature development	-10.2495	-7.67176	1012,1295,1490,2321,2324,2335,3162,3339,4017,4240,5054,6444,7040,7045,7057,7070,8829,10630,11277,26585,30008	CDH13,COL8A1,CCN2,FLT1,FLT4,FN1,HMOX1,HSPG2,LOXL2,MFGE8,SERPINE1,SGCD,TGFB1,TGFBI,THBS1,THY1,NRP1,PDPN,TREX1,GREM1,EFEMP2	21/536
8_Member	GO Biological Processes	GO:0048514	blood vessel morphogenesis	-10.1918	-7.62141	1012,1295,1490,2321,2324,2335,3162,3339,4017,4240,5054,6444,7040,7045,7057,7070,8829,26585,30008	CDH13,COL8A1,CCN2,FLT1,FLT4,FN1,HMOX1,HSPG2,LOXL2,MFGE8,SERPINE1,SGCD,TGFB1,TGFBI,THBS1,THY1,NRP1,GREM1,EFEMP2	19/430
8_Member	GO Biological Processes	GO:0001525	angiogenesis	-10.0714	-7.54235	1012,1295,1490,2321,2324,2335,3162,3339,4017,4240,5054,7040,7045,7057,7070,8829,26585	CDH13,COL8A1,CCN2,FLT1,FLT4,FN1,HMOX1,HSPG2,LOXL2,MFGE8,SERPINE1,TGFB1,TGFBI,THBS1,THY1,NRP1,GREM1	17/336
8_Member	GO Biological Processes	GO:0001568	blood vessel development	-9.68428	-7.21078	1012,1295,1490,2321,2324,2335,3162,3339,4017,4240,5054,6444,7040,7045,7057,7070,8829,11277,26585,30008	CDH13,COL8A1,CCN2,FLT1,FLT4,FN1,HMOX1,HSPG2,LOXL2,MFGE8,SERPINE1,SGCD,TGFB1,TGFBI,THBS1,THY1,NRP1,TREX1,GREM1,EFEMP2	20/517
8_Member	GO Biological Processes	GO:0035239	tube morphogenesis	-7.67281	-5.37733	1012,1295,1490,2321,2324,2335,3162,3339,4017,4240,5054,6444,7040,7045,7057,7070,8829,26585,30008,255743	CDH13,COL8A1,CCN2,FLT1,FLT4,FN1,HMOX1,HSPG2,LOXL2,MFGE8,SERPINE1,SGCD,TGFB1,TGFBI,THBS1,THY1,NRP1,GREM1,EFEMP2,NPNT	20/679
8_Member	GO Biological Processes	GO:0030335	positive regulation of cell migration	-6.68935	-4.44459	958,1012,2152,2321,2324,2335,3162,5054,5764,7040,7057,7070,8829,8840,10630,131578,646960	CD40,CDH13,F3,FLT1,FLT4,FN1,HMOX1,SERPINE1,PTN,TGFB1,THBS1,THY1,NRP1,CCN4,PDPN,LRRC15,PRSS56	17/568
8_Member	GO Biological Processes	GO:2000147	positive regulation of cell motility	-6.42812	-4.19351	958,1012,2152,2321,2324,2335,3162,5054,5764,7040,7057,7070,8829,8840,10630,131578,646960	CD40,CDH13,F3,FLT1,FLT4,FN1,HMOX1,SERPINE1,PTN,TGFB1,THBS1,THY1,NRP1,CCN4,PDPN,LRRC15,PRSS56	17/593
8_Member	GO Biological Processes	GO:0045766	positive regulation of angiogenesis	-6.40563	-4.17917	958,2152,2321,3162,5054,7057,8829,11117,26585,84034	CD40,F3,FLT1,HMOX1,SERPINE1,THBS1,NRP1,EMILIN1,GREM1,EMILIN2	10/185
8_Member	GO Biological Processes	GO:1904018	positive regulation of vasculature development	-6.40563	-4.17917	958,2152,2321,3162,5054,7057,8829,11117,26585,84034	CD40,F3,FLT1,HMOX1,SERPINE1,THBS1,NRP1,EMILIN1,GREM1,EMILIN2	10/185
8_Member	GO Biological Processes	GO:0040017	positive regulation of locomotion	-6.27794	-4.06926	958,1012,2152,2321,2324,2335,3162,5054,5764,7040,7057,7070,8829,8840,10630,131578,646960	CD40,CDH13,F3,FLT1,FLT4,FN1,HMOX1,SERPINE1,PTN,TGFB1,THBS1,THY1,NRP1,CCN4,PDPN,LRRC15,PRSS56	17/608
8_Member	GO Biological Processes	GO:0045765	regulation of angiogenesis	-6.26872	-4.06318	350,958,2152,2321,3162,3339,5054,5797,7057,8829,11117,26585,84034	APOH,CD40,F3,FLT1,HMOX1,HSPG2,SERPINE1,PTPRM,THBS1,NRP1,EMILIN1,GREM1,EMILIN2	13/350
8_Member	GO Biological Processes	GO:1901342	regulation of vasculature development	-6.18577	-3.99254	350,958,2152,2321,3162,3339,5054,5797,7057,8829,11117,26585,84034	APOH,CD40,F3,FLT1,HMOX1,HSPG2,SERPINE1,PTPRM,THBS1,NRP1,EMILIN1,GREM1,EMILIN2	13/356
8_Member	GO Biological Processes	GO:0050678	regulation of epithelial cell proliferation	-6.17132	-3.98413	350,567,1012,2152,2321,2324,3162,5654,5764,5797,7040,7057,8829,9104	APOH,B2M,CDH13,F3,FLT1,FLT4,HMOX1,HTRA1,PTN,PTPRM,TGFB1,THBS1,NRP1,RGN	14/418
8_Member	GO Biological Processes	GO:0040013	negative regulation of locomotion	-6.0618	-3.88056	350,684,2192,3162,5054,5797,7040,7057,7070,8829,9104,11117,26585,84034	APOH,BST2,FBLN1,HMOX1,SERPINE1,PTPRM,TGFB1,THBS1,THY1,NRP1,RGN,EMILIN1,GREM1,EMILIN2	14/427
8_Member	GO Biological Processes	GO:2000146	negative regulation of cell motility	-5.74545	-3.58722	350,684,2192,3162,5054,5797,7040,7057,7070,9104,11117,26585,84034	APOH,BST2,FBLN1,HMOX1,SERPINE1,PTPRM,TGFB1,THBS1,THY1,RGN,EMILIN1,GREM1,EMILIN2	13/390
8_Member	GO Biological Processes	GO:0001936	regulation of endothelial cell proliferation	-5.44248	-3.3114	350,1012,2152,2321,2324,3162,5797,7057,8829	APOH,CDH13,F3,FLT1,FLT4,HMOX1,PTPRM,THBS1,NRP1	9/185
8_Member	GO Biological Processes	GO:0050921	positive regulation of chemotaxis	-5.34291	-3.21446	1012,2152,5054,5764,7040,7057,8829,646960	CDH13,F3,SERPINE1,PTN,TGFB1,THBS1,NRP1,PRSS56	8/143
8_Member	GO Biological Processes	GO:0050920	regulation of chemotaxis	-4.68286	-2.63533	1012,2152,5054,5764,7040,7057,8829,26585,646960	CDH13,F3,SERPINE1,PTN,TGFB1,THBS1,NRP1,GREM1,PRSS56	9/230
8_Member	GO Biological Processes	GO:0010594	regulation of endothelial cell migration	-4.65323	-2.61216	350,958,2324,3162,5764,5797,7040,7057,8829	APOH,CD40,FLT4,HMOX1,PTN,PTPRM,TGFB1,THBS1,NRP1	9/232
8_Member	GO Biological Processes	GO:0030336	negative regulation of cell migration	-4.43369	-2.43343	350,684,3162,5054,5797,7040,7057,7070,11117,26585,84034	APOH,BST2,HMOX1,SERPINE1,PTPRM,TGFB1,THBS1,THY1,EMILIN1,GREM1,EMILIN2	11/375
8_Member	GO Biological Processes	GO:0043536	positive regulation of blood vessel endothelial cell migration	-3.88681	-1.95169	958,3162,7040,7057,8829	CD40,HMOX1,TGFB1,THBS1,NRP1	5/75
8_Member	GO Biological Processes	GO:0010632	regulation of epithelial cell migration	-3.8509	-1.92696	350,958,2324,3162,5764,5797,7040,7057,8829	APOH,CD40,FLT4,HMOX1,PTN,PTPRM,TGFB1,THBS1,NRP1	9/295
8_Member	GO Biological Processes	GO:0048660	regulation of smooth muscle cell proliferation	-3.80212	-1.88763	1012,1264,3162,7040,7057,8840,30008	CDH13,CNN1,HMOX1,TGFB1,THBS1,CCN4,EFEMP2	7/176
8_Member	GO Biological Processes	GO:0050680	negative regulation of epithelial cell proliferation	-3.78695	-1.87614	350,567,2321,5797,7040,7057,9104	APOH,B2M,FLT1,PTPRM,TGFB1,THBS1,RGN	7/177
8_Member	GO Biological Processes	GO:0010595	positive regulation of endothelial cell migration	-3.65932	-1.76713	958,2324,3162,7040,7057,8829	CD40,FLT4,HMOX1,TGFB1,THBS1,NRP1	6/131
8_Member	GO Biological Processes	GO:0016525	negative regulation of angiogenesis	-3.32864	-1.47563	350,3339,5054,5797,7057,11117	APOH,HSPG2,SERPINE1,PTPRM,THBS1,EMILIN1	6/151
8_Member	GO Biological Processes	GO:0048661	positive regulation of smooth muscle cell proliferation	-3.32381	-1.47356	1012,3162,7040,7057,8840	CDH13,HMOX1,TGFB1,THBS1,CCN4	5/99
8_Member	GO Biological Processes	GO:2000181	negative regulation of blood vessel morphogenesis	-3.2984	-1.45364	350,3339,5054,5797,7057,11117	APOH,HSPG2,SERPINE1,PTPRM,THBS1,EMILIN1	6/153
8_Member	GO Biological Processes	GO:1901343	negative regulation of vasculature development	-3.28346	-1.44188	350,3339,5054,5797,7057,11117	APOH,HSPG2,SERPINE1,PTPRM,THBS1,EMILIN1	6/154
8_Member	GO Biological Processes	GO:0050679	positive regulation of epithelial cell proliferation	-3.17045	-1.35905	1012,2152,2324,3162,5654,5764,8829	CDH13,F3,FLT4,HMOX1,HTRA1,PTN,NRP1	7/224
8_Member	GO Biological Processes	GO:0001938	positive regulation of endothelial cell proliferation	-3.0284	-1.23974	1012,2152,2324,3162,8829	CDH13,F3,FLT4,HMOX1,NRP1	5/115
8_Member	GO Biological Processes	GO:0010634	positive regulation of epithelial cell migration	-2.98092	-1.20495	958,2324,3162,7040,7057,8829	CD40,FLT4,HMOX1,TGFB1,THBS1,NRP1	6/176
8_Member	GO Biological Processes	GO:0001937	negative regulation of endothelial cell proliferation	-2.79576	-1.06942	350,2321,5797,7057	APOH,FLT1,PTPRM,THBS1	4/77
8_Member	GO Biological Processes	GO:1904037	positive regulation of epithelial cell apoptotic process	-2.5633	-0.88591	958,3162,7057	CD40,HMOX1,THBS1	3/43
8_Member	GO Biological Processes	GO:0043535	regulation of blood vessel endothelial cell migration	-2.49659	-0.832881	958,3162,7040,7057,8829	CD40,HMOX1,TGFB1,THBS1,NRP1	5/152
8_Member	GO Biological Processes	GO:0010596	negative regulation of endothelial cell migration	-2.39931	-0.766757	350,5797,7040,7057	APOH,PTPRM,TGFB1,THBS1	4/99
8_Member	GO Biological Processes	GO:2001237	negative regulation of extrinsic apoptotic signaling pathway	-2.39931	-0.766757	3162,5054,7057,8829	HMOX1,SERPINE1,THBS1,NRP1	4/99
8_Member	GO Biological Processes	GO:1902041	regulation of extrinsic apoptotic signaling pathway via death domain receptors	-2.37679	-0.749213	3162,5054,7057	HMOX1,SERPINE1,THBS1	3/50
8_Member	GO Biological Processes	GO:2001234	negative regulation of apoptotic signaling pathway	-2.37173	-0.745807	754,960,3162,5054,7057,8829	PTTG1IP,CD44,HMOX1,SERPINE1,THBS1,NRP1	6/233
8_Member	GO Biological Processes	GO:1904035	regulation of epithelial cell apoptotic process	-2.22366	-0.625103	958,3162,5054,7057	CD40,HMOX1,SERPINE1,THBS1	4/111
8_Member	GO Biological Processes	GO:2000351	regulation of endothelial cell apoptotic process	-2.1755	-0.589621	958,5054,7057	CD40,SERPINE1,THBS1	3/59
8_Member	GO Biological Processes	GO:0010633	negative regulation of epithelial cell migration	-2.1569	-0.574612	350,5797,7040,7057	APOH,PTPRM,TGFB1,THBS1	4/116
9_Summary	GO Biological Processes	GO:0032103	positive regulation of response to external stimulus	-9.38322	-6.94314	350,958,975,1012,2147,2152,3916,4023,5054,5340,5764,7040,7057,8829,8840,11117,83666,84034,345611,646960,3105,5627,5654,10162,11277,26585,65078,3371,9536	APOH,CD40,CD81,CDH13,F2,F3,LAMP1,LPL,SERPINE1,PLG,PTN,TGFB1,THBS1,NRP1,CCN4,EMILIN1,PARP9,EMILIN2,IRGM,PRSS56,HLA-A,PROS1,HTRA1,LPCAT3,TREX1,GREM1,RTN4R,TNC,PTGES	29/-
9_Member	GO Biological Processes	GO:0032103	positive regulation of response to external stimulus	-9.38322	-6.94314	350,958,975,1012,2147,2152,3916,4023,5054,5340,5764,7040,7057,8829,8840,11117,83666,84034,345611,646960	APOH,CD40,CD81,CDH13,F2,F3,LAMP1,LPL,SERPINE1,PLG,PTN,TGFB1,THBS1,NRP1,CCN4,EMILIN1,PARP9,EMILIN2,IRGM,PRSS56	20/538
9_Member	GO Biological Processes	GO:0032102	negative regulation of response to external stimulus	-6.3684	-4.15018	350,2147,3105,5054,5340,5627,5654,7040,7057,8829,10162,11277,26585,65078,345611	APOH,F2,HLA-A,SERPINE1,PLG,PROS1,HTRA1,TGFB1,THBS1,NRP1,LPCAT3,TREX1,GREM1,RTN4R,IRGM	15/465
9_Member	GO Biological Processes	GO:0031347	regulation of defense response	-4.75411	-2.69559	958,975,3105,3371,3916,4023,5054,5654,7040,8840,9536,10162,11117,11277,83666,84034,345611	CD40,CD81,HLA-A,TNC,LAMP1,LPL,SERPINE1,HTRA1,TGFB1,CCN4,PTGES,LPCAT3,EMILIN1,TREX1,PARP9,EMILIN2,IRGM	17/792
9_Member	GO Biological Processes	GO:0031349	positive regulation of defense response	-3.54452	-1.66578	958,975,3916,4023,5054,8840,11117,83666,84034,345611	CD40,CD81,LAMP1,LPL,SERPINE1,CCN4,EMILIN1,PARP9,EMILIN2,IRGM	10/397
9_Member	GO Biological Processes	GO:0002831	regulation of response to biotic stimulus	-2.93145	-1.16943	958,3105,3916,5654,7040,11117,11277,83666,84034,345611	CD40,HLA-A,LAMP1,HTRA1,TGFB1,EMILIN1,TREX1,PARP9,EMILIN2,IRGM	10/477
9_Member	GO Biological Processes	GO:0002832	negative regulation of response to biotic stimulus	-2.71959	-1.01409	3105,5654,7040,11277,345611	HLA-A,HTRA1,TGFB1,TREX1,IRGM	5/135
9_Member	GO Biological Processes	GO:0050727	regulation of inflammatory response	-2.69089	-0.991663	975,3371,4023,5054,8840,9536,10162,11277,345611	CD81,TNC,LPL,SERPINE1,CCN4,PTGES,LPCAT3,TREX1,IRGM	9/429
10_Summary	WikiPathways	WP4922	Mitochondrial complex IV assembly	-8.69894	-6.30463	1345,1349,1350,4512,4513,4514,28958,3162,6604,10542,10479,4538,567,1179,1490,5446,6326,6948,10463,94015,6908	COX6C,COX7B,COX7C,COX1,COX2,COX3,COA3,HMOX1,SMARCD3,LAMTOR5,SLC9A6,ND4,B2M,CLCA1,CCN2,PON3,SCN2A,TCN2,SLC30A9,TTYH2,TBP	21/-
10_Member	WikiPathways	WP4922	Mitochondrial complex IV assembly	-8.69894	-6.30463	1345,1349,1350,4512,4513,4514,28958	COX6C,COX7B,COX7C,COX1,COX2,COX3,COA3	7/34
10_Member	Reactome Gene Sets	R-HSA-9707564	Cytoprotection by HMOX1	-8.05812	-5.71388	1345,1349,1350,3162,4512,4513,4514,6604	COX6C,COX7B,COX7C,HMOX1,COX1,COX2,COX3,SMARCD3	8/64
10_Member	GO Biological Processes	GO:0006123	mitochondrial electron transport, cytochrome c to oxygen	-7.95994	-5.62842	1345,1349,1350,4512,4513,4514	COX6C,COX7B,COX7C,COX1,COX2,COX3	6/25
10_Member	CORUM	CORUM:6442	Cytochrome c oxidase, mitochondrial	-7.68326	-5.38002	1345,4512,4513,4514,28958	COX6C,COX1,COX2,COX3,COA3	5/14
10_Member	Reactome Gene Sets	R-HSA-5628897	TP53 Regulates Metabolic Genes	-5.78886	-3.62462	1345,1349,1350,4512,4513,4514,10542	COX6C,COX7B,COX7C,COX1,COX2,COX3,LAMTOR5	7/87
10_Member	KEGG Pathway	hsa04260	Cardiac muscle contraction	-5.78886	-3.62462	1345,1349,1350,4512,4513,4514,10479	COX6C,COX7B,COX7C,COX1,COX2,COX3,SLC9A6	7/87
10_Member	GO Biological Processes	GO:1902600	proton transmembrane transport	-4.31045	-2.32925	1349,1350,4512,4513,4514,4538,10479	COX7B,COX7C,COX1,COX2,COX3,ND4,SLC9A6	7/146
10_Member	Reactome Gene Sets	R-HSA-9711123	Cellular response to chemical stress	-4.30388	-2.32454	1345,1349,1350,3162,4512,4513,4514,6604	COX6C,COX7B,COX7C,HMOX1,COX1,COX2,COX3,SMARCD3	8/199
10_Member	GO Biological Processes	GO:0006812	monoatomic cation transport	-3.16552	-1.35604	567,1179,1349,1350,1490,4512,4513,4514,4538,5446,6326,6948,10463,10479	B2M,CLCA1,COX7B,COX7C,CCN2,COX1,COX2,COX3,ND4,PON3,SCN2A,TCN2,SLC30A9,SLC9A6	14/790
10_Member	GO Biological Processes	GO:0098660	inorganic ion transmembrane transport	-2.97862	-1.20495	1179,1349,1350,1490,4512,4513,4514,4538,6326,6948,10463,10479,94015	CLCA1,COX7B,COX7C,CCN2,COX1,COX2,COX3,ND4,SCN2A,TCN2,SLC30A9,SLC9A6,TTYH2	13/733
10_Member	Reactome Gene Sets	R-HSA-3700989	Transcriptional Regulation by TP53	-2.58387	-0.901834	1345,1349,1350,4512,4513,4514,6908,10542	COX6C,COX7B,COX7C,COX1,COX2,COX3,TBP,LAMTOR5	8/362
10_Member	GO Biological Processes	GO:0098662	inorganic cation transmembrane transport	-2.51499	-0.846766	1349,1350,1490,4512,4513,4514,4538,6326,6948,10463,10479	COX7B,COX7C,CCN2,COX1,COX2,COX3,ND4,SCN2A,TCN2,SLC30A9,SLC9A6	11/636
10_Member	GO Biological Processes	GO:0098655	monoatomic cation transmembrane transport	-2.41901	-0.776757	1349,1350,1490,4512,4513,4514,4538,6326,6948,10463,10479	COX7B,COX7C,CCN2,COX1,COX2,COX3,ND4,SCN2A,TCN2,SLC30A9,SLC9A6	11/655
11_Summary	GO Biological Processes	GO:0035581	sequestering of extracellular ligand from receptor	-8.31321	-5.95142	2200,2201,4052,26585,64388,1490,4053,5054,2817,5654,7040,7057,8829,11117,23390,255743,4237,5341,5797,2530,2583	FBN1,FBN2,LTBP1,GREM1,GREM2,CCN2,LTBP2,SERPINE1,GPC1,HTRA1,TGFB1,THBS1,NRP1,EMILIN1,ZDHHC17,NPNT,MFAP2,PLEK,PTPRM,FUT8,B4GALNT1	21/-
11_Member	GO Biological Processes	GO:0035581	sequestering of extracellular ligand from receptor	-8.31321	-5.95142	2200,2201,4052,26585,64388	FBN1,FBN2,LTBP1,GREM1,GREM2	5/11
11_Member	WikiPathways	WP3668	Hypothesized pathways in pathogenesis of cardiovascular disease	-7.95994	-5.62842	1490,2200,2201,4052,4053,5054	CCN2,FBN1,FBN2,LTBP1,LTBP2,SERPINE1	6/25
11_Member	GO Biological Processes	GO:1900115	extracellular regulation of signal transduction	-7.87285	-5.55772	2200,2201,4052,26585,64388	FBN1,FBN2,LTBP1,GREM1,GREM2	5/13
11_Member	GO Biological Processes	GO:1900116	extracellular negative regulation of signal transduction	-7.87285	-5.55772	2200,2201,4052,26585,64388	FBN1,FBN2,LTBP1,GREM1,GREM2	5/13
11_Member	GO Biological Processes	GO:0090287	regulation of cellular response to growth factor stimulus	-6.31085	-4.09901	2200,2201,2817,4052,5654,7040,7057,8829,11117,23390,26585,64388,255743	FBN1,FBN2,GPC1,LTBP1,HTRA1,TGFB1,THBS1,NRP1,EMILIN1,ZDHHC17,GREM1,GREM2,NPNT	13/347
11_Member	GO Biological Processes	GO:0035583	sequestering of TGFbeta in extracellular matrix	-5.97181	-3.79351	2200,2201,4052	FBN1,FBN2,LTBP1	3/4
11_Member	GO Biological Processes	GO:0017015	regulation of transforming growth factor beta receptor signaling pathway	-5.1895	-3.08398	2200,2201,4052,5654,7040,7057,11117,255743	FBN1,FBN2,LTBP1,HTRA1,TGFB1,THBS1,EMILIN1,NPNT	8/150
11_Member	GO Biological Processes	GO:1903844	regulation of cellular response to transforming growth factor beta stimulus	-5.12623	-3.02565	2200,2201,4052,5654,7040,7057,11117,255743	FBN1,FBN2,LTBP1,HTRA1,TGFB1,THBS1,EMILIN1,NPNT	8/153
11_Member	GO Biological Processes	GO:0071694	maintenance of protein location in extracellular region	-4.83401	-2.77101	2200,2201,4052	FBN1,FBN2,LTBP1	3/8
11_Member	GO Biological Processes	GO:0090288	negative regulation of cellular response to growth factor stimulus	-4.67701	-2.63165	2200,2817,5654,7057,11117,26585,64388	FBN1,GPC1,HTRA1,THBS1,EMILIN1,GREM1,GREM2	7/128
11_Member	GO Biological Processes	GO:0090092	regulation of transmembrane receptor protein serine/threonine kinase signaling pathway	-4.50653	-2.49842	2200,2201,4052,5654,7040,7057,11117,26585,64388,255743	FBN1,FBN2,LTBP1,HTRA1,TGFB1,THBS1,EMILIN1,GREM1,GREM2,NPNT	10/303
11_Member	WikiPathways	WP4816	TGF-beta receptor signaling in skeletal dysplasias	-4.38793	-2.39541	2200,4052,5054,7040,7057	FBN1,LTBP1,SERPINE1,TGFB1,THBS1	5/59
11_Member	KEGG Pathway	hsa04350	TGF-beta signaling pathway	-4.35627	-2.37133	2200,4052,7040,7057,26585,64388	FBN1,LTBP1,TGFB1,THBS1,GREM1,GREM2	6/98
11_Member	GO Biological Processes	GO:0090101	negative regulation of transmembrane receptor protein serine/threonine kinase signaling pathway	-3.87951	-1.94926	2200,2201,4052,5654,11117,26585,64388	FBN1,FBN2,LTBP1,HTRA1,EMILIN1,GREM1,GREM2	7/171
11_Member	Reactome Gene Sets	R-HSA-9006936	Signaling by TGFB family members	-3.82769	-1.90889	2200,4052,4053,5054,7040,64388	FBN1,LTBP1,LTBP2,SERPINE1,TGFB1,GREM2	6/122
11_Member	Reactome Gene Sets	R-HSA-2173789	TGF-beta receptor signaling activates SMADs	-3.64667	-1.75901	2200,4052,4053,7040	FBN1,LTBP1,LTBP2,TGFB1	4/46
11_Member	Reactome Gene Sets	R-HSA-170834	Signaling by TGF-beta Receptor Complex	-3.44891	-1.57747	2200,4052,4053,5054,7040	FBN1,LTBP1,LTBP2,SERPINE1,TGFB1	5/93
11_Member	WikiPathways	WP560	TGF-beta receptor signaling	-3.34625	-1.49045	4052,5054,7040,7057	LTBP1,SERPINE1,TGFB1,THBS1	4/55
11_Member	GO Biological Processes	GO:0030512	negative regulation of transforming growth factor beta receptor signaling pathway	-3.26445	-1.42643	2200,2201,4052,5654,11117	FBN1,FBN2,LTBP1,HTRA1,EMILIN1	5/102
11_Member	GO Biological Processes	GO:0030514	negative regulation of BMP signaling pathway	-2.92656	-1.16943	2200,5654,26585,64388	FBN1,HTRA1,GREM1,GREM2	4/71
11_Member	GO Biological Processes	GO:0048048	embryonic eye morphogenesis	-2.82224	-1.08753	2200,2201,4237	FBN1,FBN2,MFAP2	3/35
11_Member	GO Biological Processes	GO:0071692	protein localization to extracellular region	-2.77689	-1.05838	2200,2201,4052,4053,5341	FBN1,FBN2,LTBP1,LTBP2,PLEK	5/131
11_Member	GO Biological Processes	GO:0045185	maintenance of protein location	-2.46341	-0.806419	2200,2201,4052,5797	FBN1,FBN2,LTBP1,PTPRM	4/95
11_Member	GO Biological Processes	GO:0071560	cellular response to transforming growth factor beta stimulus	-2.37888	-0.750482	2200,2530,4053,7040,255743	FBN1,FUT8,LTBP2,TGFB1,NPNT	5/162
11_Member	GO Biological Processes	GO:0007179	transforming growth factor beta receptor signaling pathway	-2.36837	-0.74327	2530,4053,7040,255743	FUT8,LTBP2,TGFB1,NPNT	4/101
11_Member	GO Biological Processes	GO:0071559	response to transforming growth factor beta	-2.30158	-0.687022	2200,2530,4053,7040,255743	FBN1,FUT8,LTBP2,TGFB1,NPNT	5/169
11_Member	GO Biological Processes	GO:0051235	maintenance of location	-2.25914	-0.652517	2200,2201,2583,4052,5797	FBN1,FBN2,B4GALNT1,LTBP1,PTPRM	5/173
11_Member	GO Biological Processes	GO:0030510	regulation of BMP signaling pathway	-2.11845	-0.54597	2200,5654,26585,64388	FBN1,HTRA1,GREM1,GREM2	4/119
12_Summary	Reactome Gene Sets	R-HSA-196854	Metabolism of vitamins and cofactors	-8.30775	-5.95041	2239,2817,3339,4023,5091,5593,6383,6948,10840,55937,83666,160428	GPC4,GPC1,HSPG2,LPL,PC,PRKG2,SDC2,TCN2,ALDH1L1,APOM,PARP9,ALDH1L2	12/-
12_Member	Reactome Gene Sets	R-HSA-196854	Metabolism of vitamins and cofactors	-8.30775	-5.95041	2239,2817,3339,4023,5091,5593,6383,6948,10840,55937,83666,160428	GPC4,GPC1,HSPG2,LPL,PC,PRKG2,SDC2,TCN2,ALDH1L1,APOM,PARP9,ALDH1L2	12/191
12_Member	GO Biological Processes	GO:0019362	pyridine nucleotide metabolic process	-2.92656	-1.16943	5091,10840,83666,160428	PC,ALDH1L1,PARP9,ALDH1L2	4/71
12_Member	GO Biological Processes	GO:0046496	nicotinamide nucleotide metabolic process	-2.92656	-1.16943	5091,10840,83666,160428	PC,ALDH1L1,PARP9,ALDH1L2	4/71
12_Member	Reactome Gene Sets	R-HSA-196849	Metabolism of water-soluble vitamins and cofactors	-2.88228	-1.13578	5091,6948,10840,83666,160428	PC,TCN2,ALDH1L1,PARP9,ALDH1L2	5/124
12_Member	GO Biological Processes	GO:0006739	NADP metabolic process	-2.78652	-1.06533	5091,10840,160428	PC,ALDH1L1,ALDH1L2	3/36
12_Member	GO Biological Processes	GO:0072524	pyridine-containing compound metabolic process	-2.77508	-1.05797	5091,10840,83666,160428	PC,ALDH1L1,PARP9,ALDH1L2	4/78
13_Summary	Reactome Gene Sets	R-HSA-1630316	Glycosaminoglycan metabolism	-8.04927	-5.70931	960,2239,2799,2817,3339,6383,6483,8703,11041,26229,5091,6948,7057,29071,91869,8829,4023,55937,4126,567,2530,3105,83666,684,6908,7040	CD44,GPC4,GNS,GPC1,HSPG2,SDC2,ST3GAL2,B4GALT3,B4GAT1,B3GAT3,PC,TCN2,THBS1,C1GALT1C1,RFT1,NRP1,LPL,APOM,MANBA,B2M,FUT8,HLA-A,PARP9,BST2,TBP,TGFB1	26/-
13_Member	Reactome Gene Sets	R-HSA-1630316	Glycosaminoglycan metabolism	-8.04927	-5.70931	960,2239,2799,2817,3339,6383,6483,8703,11041,26229	CD44,GPC4,GNS,GPC1,HSPG2,SDC2,ST3GAL2,B4GALT3,B4GAT1,B3GAT3	10/124
13_Member	Reactome Gene Sets	R-HSA-5668914	Diseases of metabolism	-7.03124	-4.75823	2239,2799,2817,3339,5091,6383,6948,7057,11041,26229,29071,91869	GPC4,GNS,GPC1,HSPG2,PC,SDC2,TCN2,THBS1,B4GAT1,B3GAT3,C1GALT1C1,RFT1	12/249
13_Member	Reactome Gene Sets	R-HSA-9694614	Attachment and Entry	-6.93066	-4.66128	2239,2817,3339,6383,8829	GPC4,GPC1,HSPG2,SDC2,NRP1	5/19
13_Member	Reactome Gene Sets	R-HSA-3560801	Defective B3GAT3 causes JDSSDHD	-6.80801	-4.55636	2239,2817,3339,6383,26229	GPC4,GPC1,HSPG2,SDC2,B3GAT3	5/20
13_Member	Reactome Gene Sets	R-HSA-975634	Retinoid metabolism and transport	-6.40387	-4.17917	2239,2817,3339,4023,6383,55937	GPC4,GPC1,HSPG2,LPL,SDC2,APOM	6/44
13_Member	Reactome Gene Sets	R-HSA-3781865	Diseases of glycosylation	-6.3734	-4.15195	2239,2817,3339,6383,7057,11041,26229,29071,91869	GPC4,GPC1,HSPG2,SDC2,THBS1,B4GAT1,B3GAT3,C1GALT1C1,RFT1	9/143
13_Member	Reactome Gene Sets	R-HSA-71387	Metabolism of carbohydrates	-6.21065	-4.01131	960,2239,2799,2817,3339,4126,5091,6383,6483,8703,11041,26229	CD44,GPC4,GNS,GPC1,HSPG2,MANBA,PC,SDC2,ST3GAL2,B4GALT3,B4GAT1,B3GAT3	12/297
13_Member	Reactome Gene Sets	R-HSA-1971475	A tetrasaccharide linker sequence is required for GAG synthesis	-6.19408	-3.99781	2239,2817,3339,6383,26229	GPC4,GPC1,HSPG2,SDC2,B3GAT3	5/26
13_Member	Reactome Gene Sets	R-HSA-6806667	Metabolism of fat-soluble vitamins	-6.17307	-3.98413	2239,2817,3339,4023,6383,55937	GPC4,GPC1,HSPG2,LPL,SDC2,APOM	6/48
13_Member	Reactome Gene Sets	R-HSA-3656237	Defective EXT2 causes exostoses 2	-5.78848	-3.62462	2239,2817,3339,6383	GPC4,GPC1,HSPG2,SDC2	4/14
13_Member	Reactome Gene Sets	R-HSA-3656253	Defective EXT1 causes exostoses 1, TRPS2 and CHDS	-5.78848	-3.62462	2239,2817,3339,6383	GPC4,GPC1,HSPG2,SDC2	4/14
13_Member	Reactome Gene Sets	R-HSA-9772572	Early SARS-CoV-2 Infection Events	-5.33893	-3.21309	2239,2817,3339,6383,8829	GPC4,GPC1,HSPG2,SDC2,NRP1	5/38
13_Member	Reactome Gene Sets	R-HSA-3560782	Diseases associated with glycosaminoglycan metabolism	-5.17172	-3.06867	2239,2817,3339,6383,26229	GPC4,GPC1,HSPG2,SDC2,B3GAT3	5/41
13_Member	Reactome Gene Sets	R-HSA-3560783	Defective B4GALT7 causes EDS, progeroid type	-5.11686	-3.02116	2239,2817,3339,6383	GPC4,GPC1,HSPG2,SDC2	4/20
13_Member	Reactome Gene Sets	R-HSA-4420332	Defective B3GALT6 causes EDSP2 and SEMDJL1	-5.11686	-3.02116	2239,2817,3339,6383	GPC4,GPC1,HSPG2,SDC2	4/20
13_Member	Reactome Gene Sets	R-HSA-2024096	HS-GAG degradation	-4.94235	-2.86097	2239,2817,3339,6383	GPC4,GPC1,HSPG2,SDC2	4/22
13_Member	Reactome Gene Sets	R-HSA-1793185	Chondroitin sulfate/dermatan sulfate metabolism	-4.74087	-2.68678	2239,2817,3339,6383,26229	GPC4,GPC1,HSPG2,SDC2,B3GAT3	5/50
13_Member	Reactome Gene Sets	R-HSA-9694516	SARS-CoV-2 Infection	-4.55545	-2.53323	567,2239,2530,2817,3105,3339,6383,6483,8829,83666	B2M,GPC4,FUT8,GPC1,HLA-A,HSPG2,SDC2,ST3GAL2,NRP1,PARP9	10/299
13_Member	Reactome Gene Sets	R-HSA-1638091	Heparan sulfate/heparin (HS-GAG) metabolism	-4.53692	-2.51674	2239,2817,3339,6383,26229	GPC4,GPC1,HSPG2,SDC2,B3GAT3	5/55
13_Member	Reactome Gene Sets	R-HSA-2022928	HS-GAG biosynthesis	-4.32856	-2.34549	2239,2817,3339,6383	GPC4,GPC1,HSPG2,SDC2	4/31
13_Member	Reactome Gene Sets	R-HSA-2187338	Visual phototransduction	-4.16519	-2.20224	2239,2817,3339,4023,6383,55937	GPC4,GPC1,HSPG2,LPL,SDC2,APOM	6/106
13_Member	Reactome Gene Sets	R-HSA-9679506	SARS-CoV Infections	-4.04959	-2.09549	567,684,2239,2530,2817,3105,3339,6383,6483,8829,83666	B2M,BST2,GPC4,FUT8,GPC1,HLA-A,HSPG2,SDC2,ST3GAL2,NRP1,PARP9	11/414
13_Member	Reactome Gene Sets	R-HSA-9824446	Viral Infection Pathways	-2.80325	-1.07483	567,684,2239,2530,2817,3105,3339,6383,6483,6908,7040,8829,83666	B2M,BST2,GPC4,FUT8,GPC1,HLA-A,HSPG2,SDC2,ST3GAL2,TBP,TGFB1,NRP1,PARP9	13/767
14_Summary	GO Biological Processes	GO:0050865	regulation of cell activation	-7.90935	-5.58198	567,958,975,1490,2147,2335,3105,3162,3916,5341,5621,6604,7040,7057,7070,10630,11117,11277,84034,345611,2152,2324,4023,5054,10542,10554,684,960,5340,6892,83666,123920,6908,8829,6444	B2M,CD40,CD81,CCN2,F2,FN1,HLA-A,HMOX1,LAMP1,PLEK,PRNP,SMARCD3,TGFB1,THBS1,THY1,PDPN,EMILIN1,TREX1,EMILIN2,IRGM,F3,FLT4,LPL,SERPINE1,LAMTOR5,AGPAT1,BST2,CD44,PLG,TAPBP,PARP9,CMTM3,TBP,NRP1,SGCD	35/-
14_Member	GO Biological Processes	GO:0050865	regulation of cell activation	-7.90935	-5.58198	567,958,975,1490,2147,2335,3105,3162,3916,5341,5621,6604,7040,7057,7070,10630,11117,11277,84034,345611	B2M,CD40,CD81,CCN2,F2,FN1,HLA-A,HMOX1,LAMP1,PLEK,PRNP,SMARCD3,TGFB1,THBS1,THY1,PDPN,EMILIN1,TREX1,EMILIN2,IRGM	20/657
14_Member	GO Biological Processes	GO:0050867	positive regulation of cell activation	-4.9392	-2.86015	567,958,975,1490,3105,3916,5341,6604,7040,7057,7070,345611	B2M,CD40,CD81,CCN2,HLA-A,LAMP1,PLEK,SMARCD3,TGFB1,THBS1,THY1,IRGM	12/395
14_Member	GO Biological Processes	GO:0001819	positive regulation of cytokine production	-4.61912	-2.58241	567,958,975,2152,2324,3105,3162,4023,5054,7040,7057,10542,10554	B2M,CD40,CD81,F3,FLT4,HLA-A,HMOX1,LPL,SERPINE1,TGFB1,THBS1,LAMTOR5,AGPAT1	13/497
14_Member	GO Biological Processes	GO:0002700	regulation of production of molecular mediator of immune response	-4.42998	-2.43167	567,684,958,975,3105,3162,7040,11277	B2M,BST2,CD40,CD81,HLA-A,HMOX1,TGFB1,TREX1	8/191
14_Member	GO Biological Processes	GO:0002694	regulation of leukocyte activation	-4.38994	-2.39541	567,958,975,2335,3105,3162,3916,5621,6604,7040,7057,7070,11277,345611	B2M,CD40,CD81,FN1,HLA-A,HMOX1,LAMP1,PRNP,SMARCD3,TGFB1,THBS1,THY1,TREX1,IRGM	14/600
14_Member	GO Biological Processes	GO:0022407	regulation of cell-cell adhesion	-4.01656	-2.07454	567,960,975,3105,5340,5621,6604,7040,7070,10630,11117,84034	B2M,CD44,CD81,HLA-A,PLG,PRNP,SMARCD3,TGFB1,THY1,PDPN,EMILIN1,EMILIN2	12/492
14_Member	GO Biological Processes	GO:0002718	regulation of cytokine production involved in immune response	-3.84728	-1.92523	567,684,975,3105,3162,7040	B2M,BST2,CD81,HLA-A,HMOX1,TGFB1	6/121
14_Member	GO Biological Processes	GO:0002708	positive regulation of lymphocyte mediated immunity	-3.73246	-1.82639	567,958,975,3105,3916,7040	B2M,CD40,CD81,HLA-A,LAMP1,TGFB1	6/127
14_Member	GO Biological Processes	GO:0002696	positive regulation of leukocyte activation	-3.71419	-1.81434	567,958,975,3105,3916,6604,7040,7057,7070,345611	B2M,CD40,CD81,HLA-A,LAMP1,SMARCD3,TGFB1,THBS1,THY1,IRGM	10/378
14_Member	WikiPathways	WP5078	T cell modulation in pancreatic cancer	-3.64667	-1.75901	567,958,3105,7040	B2M,CD40,HLA-A,TGFB1	4/46
14_Member	GO Biological Processes	GO:0002703	regulation of leukocyte mediated immunity	-3.64346	-1.7573	567,684,958,975,3105,3162,3916,7040	B2M,BST2,CD40,CD81,HLA-A,HMOX1,LAMP1,TGFB1	8/248
14_Member	GO Biological Processes	GO:0022409	positive regulation of cell-cell adhesion	-3.57874	-1.69853	567,960,975,3105,6604,7070,10630,11117,84034	B2M,CD44,CD81,HLA-A,SMARCD3,THY1,PDPN,EMILIN1,EMILIN2	9/321
14_Member	GO Biological Processes	GO:0019885	antigen processing and presentation of endogenous peptide antigen via MHC class I	-3.36512	-1.5046	567,3105,6892	B2M,HLA-A,TAPBP	3/23
14_Member	GO Biological Processes	GO:0002705	positive regulation of leukocyte mediated immunity	-3.35935	-1.50216	567,958,975,3105,3916,7040	B2M,CD40,CD81,HLA-A,LAMP1,TGFB1	6/149
14_Member	GO Biological Processes	GO:0002483	antigen processing and presentation of endogenous peptide antigen	-3.25575	-1.42446	567,3105,6892	B2M,HLA-A,TAPBP	3/25
14_Member	GO Biological Processes	GO:0002726	positive regulation of T cell cytokine production	-3.20458	-1.38622	567,975,3105	B2M,CD81,HLA-A	3/26
14_Member	Reactome Gene Sets	R-HSA-983170	Antigen Presentation: Folding, assembly and peptide loading of class I MHC	-3.06299	-1.2692	567,3105,6892	B2M,HLA-A,TAPBP	3/29
14_Member	GO Biological Processes	GO:0002697	regulation of immune effector process	-2.99739	-1.2182	567,684,958,975,3105,3162,3916,7040,11277	B2M,BST2,CD40,CD81,HLA-A,HMOX1,LAMP1,TGFB1,TREX1	9/387
14_Member	GO Biological Processes	GO:0019883	antigen processing and presentation of endogenous antigen	-2.93648	-1.17225	567,3105,6892	B2M,HLA-A,TAPBP	3/32
14_Member	GO Biological Processes	GO:0002824	positive regulation of adaptive immune response based on somatic recombination of immune receptors built from immunoglobulin superfamily domains	-2.8979	-1.14738	567,958,975,3105,7040	B2M,CD40,CD81,HLA-A,TGFB1	5/123
14_Member	GO Biological Processes	GO:0051251	positive regulation of lymphocyte activation	-2.85808	-1.11898	567,958,975,3105,3916,6604,7040,7070	B2M,CD40,CD81,HLA-A,LAMP1,SMARCD3,TGFB1,THY1	8/327
14_Member	GO Biological Processes	GO:0002706	regulation of lymphocyte mediated immunity	-2.85795	-1.11898	567,958,975,3105,3916,7040	B2M,CD40,CD81,HLA-A,LAMP1,TGFB1	6/186
14_Member	GO Biological Processes	GO:0002821	positive regulation of adaptive immune response	-2.80632	-1.07686	567,958,975,3105,7040	B2M,CD40,CD81,HLA-A,TGFB1	5/129
14_Member	GO Biological Processes	GO:0002474	antigen processing and presentation of peptide antigen via MHC class I	-2.78652	-1.06533	567,3105,6892	B2M,HLA-A,TAPBP	3/36
14_Member	GO Biological Processes	GO:0051249	regulation of lymphocyte activation	-2.75496	-1.03886	567,958,975,3105,3916,5621,6604,7040,7070,11277	B2M,CD40,CD81,HLA-A,LAMP1,PRNP,SMARCD3,TGFB1,THY1,TREX1	10/504
14_Member	GO Biological Processes	GO:0002702	positive regulation of production of molecular mediator of immune response	-2.71959	-1.01409	567,958,975,3105,7040	B2M,CD40,CD81,HLA-A,TGFB1	5/135
14_Member	GO Biological Processes	GO:0002724	regulation of T cell cytokine production	-2.71821	-1.01409	567,975,3105	B2M,CD81,HLA-A	3/38
14_Member	GO Biological Processes	GO:0002699	positive regulation of immune effector process	-2.71236	-1.01021	567,958,975,3105,3162,3916,7040	B2M,CD40,CD81,HLA-A,HMOX1,LAMP1,TGFB1	7/269
14_Member	GO Biological Processes	GO:0002456	T cell mediated immunity	-2.68551	-0.987256	567,3105,11277	B2M,HLA-A,TREX1	3/39
14_Member	GO Biological Processes	GO:0050778	positive regulation of immune response	-2.58844	-0.905466	567,958,975,3105,3916,7040,7070,11277,83666,123920,345611	B2M,CD40,CD81,HLA-A,LAMP1,TGFB1,THY1,TREX1,PARP9,CMTM3,IRGM	11/622
14_Member	KEGG Pathway	hsa05166	Human T-cell leukemia virus 1 infection	-2.47393	-0.812896	567,958,3105,6908,7040,8829	B2M,CD40,HLA-A,TBP,TGFB1,NRP1	6/222
14_Member	GO Biological Processes	GO:0001910	regulation of leukocyte mediated cytotoxicity	-2.4471	-0.79751	567,3105,3916,7040	B2M,HLA-A,LAMP1,TGFB1	4/96
14_Member	GO Biological Processes	GO:0002443	leukocyte mediated immunity	-2.41742	-0.776757	567,958,975,2147,3105,11277	B2M,CD40,CD81,F2,HLA-A,TREX1	6/228
14_Member	GO Biological Processes	GO:0042269	regulation of natural killer cell mediated cytotoxicity	-2.4016	-0.767375	3105,3916,7040	HLA-A,LAMP1,TGFB1	3/49
14_Member	GO Biological Processes	GO:0019882	antigen processing and presentation	-2.35317	-0.731291	567,3105,6892,11277	B2M,HLA-A,TAPBP,TREX1	4/102
14_Member	GO Biological Processes	GO:0002715	regulation of natural killer cell mediated immunity	-2.3055	-0.690143	3105,3916,7040	HLA-A,LAMP1,TGFB1	3/53
14_Member	GO Biological Processes	GO:0002449	lymphocyte mediated immunity	-2.24871	-0.644447	567,958,975,3105,11277	B2M,CD40,CD81,HLA-A,TREX1	5/174
14_Member	GO Biological Processes	GO:0019724	B cell mediated immunity	-2.22366	-0.625103	567,958,975,11277	B2M,CD40,CD81,TREX1	4/111
14_Member	GO Biological Processes	GO:0031341	regulation of cell killing	-2.22366	-0.625103	567,3105,3916,7040	B2M,HLA-A,LAMP1,TGFB1	4/111
14_Member	GO Biological Processes	GO:0002460	adaptive immune response based on somatic recombination of immune receptors built from immunoglobulin superfamily domains	-2.15808	-0.574612	567,958,975,3105,11277	B2M,CD40,CD81,HLA-A,TREX1	5/183
14_Member	KEGG Pathway	hsa05416	Viral myocarditis	-2.15527	-0.574612	958,3105,6444	CD40,HLA-A,SGCD	3/60
14_Member	GO Biological Processes	GO:0001909	leukocyte mediated cytotoxicity	-2.13542	-0.559182	567,2147,3105	B2M,F2,HLA-A	3/61
14_Member	GO Biological Processes	GO:0002822	regulation of adaptive immune response based on somatic recombination of immune receptors built from immunoglobulin superfamily domains	-2.09132	-0.525233	567,958,975,3105,7040	B2M,CD40,CD81,HLA-A,TGFB1	5/190
14_Member	GO Biological Processes	GO:1903039	positive regulation of leukocyte cell-cell adhesion	-2.0462	-0.491433	567,960,975,3105,6604,7070	B2M,CD44,CD81,HLA-A,SMARCD3,THY1	6/273
14_Member	GO Biological Processes	GO:0001912	positive regulation of leukocyte mediated cytotoxicity	-2.00594	-0.459216	567,3105,3916	B2M,HLA-A,LAMP1	3/68
15_Summary	GO Biological Processes	GO:0008285	negative regulation of cell population proliferation	-7.30216	-5.01806	350,567,1012,1264,2192,2321,3162,3490,5340,5621,5764,5797,6586,7040,7057,9104,9536,10630,26585,30008,80781	APOH,B2M,CDH13,CNN1,FBLN1,FLT1,HMOX1,IGFBP7,PLG,PRNP,PTN,PTPRM,SLIT3,TGFB1,THBS1,RGN,PTGES,PDPN,GREM1,EFEMP2,COL18A1	21/-
15_Member	GO Biological Processes	GO:0008285	negative regulation of cell population proliferation	-7.30216	-5.01806	350,567,1012,1264,2192,2321,3162,3490,5340,5621,5764,5797,6586,7040,7057,9104,9536,10630,26585,30008,80781	APOH,B2M,CDH13,CNN1,FBLN1,FLT1,HMOX1,IGFBP7,PLG,PRNP,PTN,PTPRM,SLIT3,TGFB1,THBS1,RGN,PTGES,PDPN,GREM1,EFEMP2,COL18A1	21/787
16_Summary	GO Biological Processes	GO:0002040	sprouting angiogenesis	-6.90465	-4.646	1012,2324,4017,7040,7057,8829,26585,649,1490,5593,8840,58,2335,2530,10630	CDH13,FLT4,LOXL2,TGFB1,THBS1,NRP1,GREM1,BMP1,CCN2,PRKG2,CCN4,ACTA1,FN1,FUT8,PDPN	15/-
16_Member	GO Biological Processes	GO:0002040	sprouting angiogenesis	-6.90465	-4.646	1012,2324,4017,7040,7057,8829,26585	CDH13,FLT4,LOXL2,TGFB1,THBS1,NRP1,GREM1	7/60
16_Member	GO Biological Processes	GO:0061035	regulation of cartilage development	-5.08929	-2.996	649,1490,4017,5593,8840,26585	BMP1,CCN2,LOXL2,PRKG2,CCN4,GREM1	6/73
16_Member	GO Biological Processes	GO:0032330	regulation of chondrocyte differentiation	-4.57604	-2.54697	1490,4017,5593,8840,26585	CCN2,LOXL2,PRKG2,CCN4,GREM1	5/54
16_Member	GO Biological Processes	GO:0090130	tissue migration	-3.13333	-1.3276	58,1012,4017,8829,26585	ACTA1,CDH13,LOXL2,NRP1,GREM1	5/109
16_Member	GO Biological Processes	GO:0043542	endothelial cell migration	-2.94956	-1.18306	1012,4017,8829,26585	CDH13,LOXL2,NRP1,GREM1	4/70
16_Member	GO Biological Processes	GO:0061036	positive regulation of cartilage development	-2.89715	-1.14738	649,4017,5593	BMP1,LOXL2,PRKG2	3/33
16_Member	GO Biological Processes	GO:0001667	ameboidal-type cell migration	-2.73157	-1.0215	1012,2335,2530,4017,8829,26585	CDH13,FN1,FUT8,LOXL2,NRP1,GREM1	6/197
16_Member	GO Biological Processes	GO:0010631	epithelial cell migration	-2.38375	-0.754526	1012,4017,8829,26585	CDH13,LOXL2,NRP1,GREM1	4/100
16_Member	GO Biological Processes	GO:0090132	epithelium migration	-2.33813	-0.717117	1012,4017,8829,26585	CDH13,LOXL2,NRP1,GREM1	4/103
16_Member	GO Biological Processes	GO:0010717	regulation of epithelial to mesenchymal transition	-2.21003	-0.615818	4017,7040,10630,26585	LOXL2,TGFB1,PDPN,GREM1	4/112
16_Member	GO Biological Processes	GO:0010718	positive regulation of epithelial to mesenchymal transition	-2.15527	-0.574612	4017,7040,10630	LOXL2,TGFB1,PDPN	3/60
17_Summary	GO Biological Processes	GO:0009100	glycoprotein metabolic process	-6.31085	-4.09901	175,2530,2817,4126,6483,8703,11041,11277,26229,29071,64409,91869,200185,2583,2799,7057	AGA,FUT8,GPC1,MANBA,ST3GAL2,B4GALT3,B4GAT1,TREX1,B3GAT3,C1GALT1C1,GALNT17,RFT1,KRTCAP2,B4GALNT1,GNS,THBS1	16/-
17_Member	GO Biological Processes	GO:0009100	glycoprotein metabolic process	-6.31085	-4.09901	175,2530,2817,4126,6483,8703,11041,11277,26229,29071,64409,91869,200185	AGA,FUT8,GPC1,MANBA,ST3GAL2,B4GALT3,B4GAT1,TREX1,B3GAT3,C1GALT1C1,GALNT17,RFT1,KRTCAP2	13/347
17_Member	GO Biological Processes	GO:0070085	glycosylation	-5.46475	-3.32838	2530,2583,6483,8703,11041,26229,29071,64409,91869,200185	FUT8,B4GALNT1,ST3GAL2,B4GALT3,B4GAT1,B3GAT3,C1GALT1C1,GALNT17,RFT1,KRTCAP2	10/235
17_Member	GO Biological Processes	GO:0009101	glycoprotein biosynthetic process	-4.85298	-2.78391	2530,6483,8703,11041,11277,26229,29071,64409,91869,200185	FUT8,ST3GAL2,B4GALT3,B4GAT1,TREX1,B3GAT3,C1GALT1C1,GALNT17,RFT1,KRTCAP2	10/276
17_Member	GO Biological Processes	GO:0006486	protein glycosylation	-4.85143	-2.78391	2530,6483,8703,11041,26229,29071,64409,91869,200185	FUT8,ST3GAL2,B4GALT3,B4GAT1,B3GAT3,C1GALT1C1,GALNT17,RFT1,KRTCAP2	9/219
17_Member	GO Biological Processes	GO:0043413	macromolecule glycosylation	-4.85143	-2.78391	2530,6483,8703,11041,26229,29071,64409,91869,200185	FUT8,ST3GAL2,B4GALT3,B4GAT1,B3GAT3,C1GALT1C1,GALNT17,RFT1,KRTCAP2	9/219
17_Member	Reactome Gene Sets	R-HSA-1638074	Keratan sulfate/keratin metabolism	-4.16669	-2.20224	2799,6483,8703,11041	GNS,ST3GAL2,B4GALT3,B4GAT1	4/34
17_Member	GO Biological Processes	GO:0042339	keratan sulfate metabolic process	-3.69128	-1.79604	2799,6483,11041	GNS,ST3GAL2,B4GAT1	3/18
17_Member	Reactome Gene Sets	R-HSA-2022854	Keratan sulfate biosynthesis	-3.10835	-1.30633	6483,8703,11041	ST3GAL2,B4GALT3,B4GAT1	3/28
17_Member	Reactome Gene Sets	R-HSA-5173105	O-linked glycosylation	-3.09763	-1.29685	6483,7057,11041,29071,64409	ST3GAL2,THBS1,B4GAT1,C1GALT1C1,GALNT17	5/111
17_Member	KEGG Pathway	hsa00512	Mucin type O-glycan biosynthesis	-2.78652	-1.06533	6483,29071,64409	ST3GAL2,C1GALT1C1,GALNT17	3/36
17_Member	KEGG Pathway	hsa00514	Other types of O-glycan biosynthesis	-2.45296	-0.800757	8703,29071,64409	B4GALT3,C1GALT1C1,GALNT17	3/47
17_Member	GO Biological Processes	GO:0006493	protein O-linked glycosylation	-2.41505	-0.775765	6483,11041,29071,64409	ST3GAL2,B4GAT1,C1GALT1C1,GALNT17	4/98
17_Member	Reactome Gene Sets	R-HSA-913709	O-linked glycosylation of mucins	-2.09678	-0.529979	6483,29071,64409	ST3GAL2,C1GALT1C1,GALNT17	3/63
17_Member	GO Biological Processes	GO:0006024	glycosaminoglycan biosynthetic process	-2.0595	-0.501931	6483,11041,26229	ST3GAL2,B4GAT1,B3GAT3	3/65
17_Member	GO Biological Processes	GO:0006023	aminoglycan biosynthetic process	-2.02349	-0.472199	6483,11041,26229	ST3GAL2,B4GAT1,B3GAT3	3/67
17_Member	Reactome Gene Sets	R-HSA-3906995	Diseases associated with O-glycosylation of proteins	-2.00594	-0.459216	7057,11041,29071	THBS1,B4GAT1,C1GALT1C1	3/68
18_Summary	Reactome Gene Sets	R-HSA-3000170	Syndecan interactions	-6.10742	-3.92322	2335,3371,6383,7040,7057,3339,960,2147,2817,5627,7102,3490,84171,958,975,5054,5340,2152	FN1,TNC,SDC2,TGFB1,THBS1,HSPG2,CD44,F2,GPC1,PROS1,TSPAN7,IGFBP7,LOXL4,CD40,CD81,SERPINE1,PLG,F3	18/-
18_Member	Reactome Gene Sets	R-HSA-3000170	Syndecan interactions	-6.10742	-3.92322	2335,3371,6383,7040,7057	FN1,TNC,SDC2,TGFB1,THBS1	5/27
18_Member	Reactome Gene Sets	R-HSA-3000171	Non-integrin membrane-ECM interactions	-5.63389	-3.48673	2335,3339,3371,6383,7040,7057	FN1,HSPG2,TNC,SDC2,TGFB1,THBS1	6/59
18_Member	Reactome Gene Sets	R-HSA-202733	Cell surface interactions at the vascular wall	-5.48134	-3.3423	960,2147,2335,2817,5627,6383,7040,7102	CD44,F2,FN1,GPC1,PROS1,SDC2,TGFB1,TSPAN7	8/137
18_Member	WikiPathways	WP3670	Interactions between LOXL4 and oxidative stress pathway	-5.31202	-3.19135	2335,3490,7040,84171	FN1,IGFBP7,TGFB1,LOXL4	4/18
18_Member	KEGG Pathway	hsa05144	Malaria	-4.74087	-2.68678	958,975,6383,7040,7057	CD40,CD81,SDC2,TGFB1,THBS1	5/50
18_Member	Reactome Gene Sets	R-HSA-3000178	ECM proteoglycans	-3.85953	-1.93092	2335,3339,3371,5054,7040	FN1,HSPG2,TNC,SERPINE1,TGFB1	5/76
18_Member	Canonical Pathways	M174	PID UPA UPAR PATHWAY	-3.80162	-1.88763	2335,5054,5340,7040	FN1,SERPINE1,PLG,TGFB1	4/42
18_Member	KEGG Pathway	hsa05205	Proteoglycans in cancer	-3.39915	-1.5306	960,2335,2817,3339,6383,7040,7057	CD44,FN1,GPC1,HSPG2,SDC2,TGFB1,THBS1	7/205
18_Member	Canonical Pathways	M240	PID SYNDECAN 2 PATHWAY	-2.89715	-1.14738	2335,6383,7040	FN1,SDC2,TGFB1	3/33
18_Member	WikiPathways	WP2911	miRNA targets in ECM and membrane receptors	-2.5633	-0.88591	2335,6383,7057	FN1,SDC2,THBS1	3/43
18_Member	KEGG Pathway	hsa04933	AGE-RAGE signaling pathway in diabetic complications	-2.38375	-0.754526	2152,2335,5054,7040	F3,FN1,SERPINE1,TGFB1	4/100
19_Summary	Reactome Gene Sets	R-HSA-6798695	Neutrophil degranulation	-5.45937	-3.32566	175,567,684,960,2040,2517,2799,3916,3920,4126,5337,57153,84418,387921	AGA,B2M,BST2,CD44,STOM,FUCA1,GNS,LAMP1,LAMP2,MANBA,PLD1,SLC44A2,CYSTM1,NHLRC3	14/-
19_Member	Reactome Gene Sets	R-HSA-6798695	Neutrophil degranulation	-5.45937	-3.32566	175,567,684,960,2040,2517,2799,3916,3920,4126,5337,57153,84418,387921	AGA,B2M,BST2,CD44,STOM,FUCA1,GNS,LAMP1,LAMP2,MANBA,PLD1,SLC44A2,CYSTM1,NHLRC3	14/481
19_Member	KEGG Pathway	hsa00511	Other glycan degradation	-3.69128	-1.79604	175,2517,4126	AGA,FUCA1,MANBA	3/18
19_Member	KEGG Pathway	hsa04142	Lysosome	-3.64144	-1.75677	175,2517,2799,3916,3920,4126	AGA,FUCA1,GNS,LAMP1,LAMP2,MANBA	6/132
20_Summary	GO Biological Processes	GO:0002683	negative regulation of immune system process	-5.26715	-3.15413	684,2200,2335,3105,3162,5621,7040,7057,7070,11117,11277,26585,28959,345611,958,960,975,8829,83666,2147,2152,3339,5764,57326,1490,2321,2324,11232,9104	BST2,FBN1,FN1,HLA-A,HMOX1,PRNP,TGFB1,THBS1,THY1,EMILIN1,TREX1,GREM1,TMEM176B,IRGM,CD40,CD44,CD81,NRP1,PARP9,F2,F3,HSPG2,PTN,PBXIP1,CCN2,FLT1,FLT4,POLG2,RGN	29/-
20_Member	GO Biological Processes	GO:0002683	negative regulation of immune system process	-5.26715	-3.15413	684,2200,2335,3105,3162,5621,7040,7057,7070,11117,11277,26585,28959,345611	BST2,FBN1,FN1,HLA-A,HMOX1,PRNP,TGFB1,THBS1,THY1,EMILIN1,TREX1,GREM1,TMEM176B,IRGM	14/500
20_Member	GO Biological Processes	GO:0050731	positive regulation of peptidyl-tyrosine phosphorylation	-4.59656	-2.56397	958,960,975,5621,7040,8829,26585,83666	CD40,CD44,CD81,PRNP,TGFB1,NRP1,GREM1,PARP9	8/181
20_Member	GO Biological Processes	GO:0050730	regulation of peptidyl-tyrosine phosphorylation	-4.38603	-2.39541	958,960,975,5621,7040,7070,8829,26585,83666	CD40,CD44,CD81,PRNP,TGFB1,THY1,NRP1,GREM1,PARP9	9/251
20_Member	GO Biological Processes	GO:0006954	inflammatory response	-4.09135	-2.13372	958,960,2147,2152,2335,3162,3339,5764,7040,7057,11277,57326,345611	CD40,CD44,F2,F3,FN1,HMOX1,HSPG2,PTN,TGFB1,THBS1,TREX1,PBXIP1,IRGM	13/560
20_Member	GO Biological Processes	GO:0001934	positive regulation of protein phosphorylation	-3.60033	-1.71864	958,960,975,1490,2147,2321,2324,5621,7040,7057,8829,26585,83666,345611	CD40,CD44,CD81,CCN2,F2,FLT1,FLT4,PRNP,TGFB1,THBS1,NRP1,GREM1,PARP9,IRGM	14/714
20_Member	GO Biological Processes	GO:0033674	positive regulation of kinase activity	-3.28123	-1.44188	958,975,2147,2321,2324,5621,7040,7057,26585,345611	CD40,CD81,F2,FLT1,FLT4,PRNP,TGFB1,THBS1,GREM1,IRGM	10/429
20_Member	GO Biological Processes	GO:0042327	positive regulation of phosphorylation	-3.25741	-1.42446	958,960,975,1490,2147,2321,2324,5621,7040,7057,8829,26585,83666,345611	CD40,CD44,CD81,CCN2,F2,FLT1,FLT4,PRNP,TGFB1,THBS1,NRP1,GREM1,PARP9,IRGM	14/773
20_Member	GO Biological Processes	GO:0051347	positive regulation of transferase activity	-3.18494	-1.3704	958,975,2147,2321,2324,5621,7040,7057,11232,26585,345611	CD40,CD81,F2,FLT1,FLT4,PRNP,TGFB1,THBS1,POLG2,GREM1,IRGM	11/523
20_Member	GO Biological Processes	GO:0043549	regulation of kinase activity	-2.58164	-0.901468	958,975,2147,2321,2324,5621,7040,7057,7070,9104,26585,345611	CD40,CD81,F2,FLT1,FLT4,PRNP,TGFB1,THBS1,THY1,RGN,GREM1,IRGM	12/717
20_Member	GO Biological Processes	GO:0001818	negative regulation of cytokine production	-2.44244	-0.793716	684,2147,2335,3162,5621,7040,7057,345611	BST2,F2,FN1,HMOX1,PRNP,TGFB1,THBS1,IRGM	8/382
20_Member	GO Biological Processes	GO:0043406	positive regulation of MAP kinase activity	-2.14396	-0.564036	958,2321,7040,7057	CD40,FLT1,TGFB1,THBS1	4/117
20_Member	GO Biological Processes	GO:0070663	regulation of leukocyte proliferation	-2.08341	-0.518756	684,958,975,3105,5621,26585	BST2,CD40,CD81,HLA-A,PRNP,GREM1	6/268
20_Member	GO Biological Processes	GO:0071902	positive regulation of protein serine/threonine kinase activity	-2.05453	-0.499059	958,2321,7040,7057,345611	CD40,FLT1,TGFB1,THBS1,IRGM	5/194
20_Member	GO Biological Processes	GO:0045860	positive regulation of protein kinase activity	-2.005	-0.459216	958,2321,5621,7040,7057,26585,345611	CD40,FLT1,PRNP,TGFB1,THBS1,GREM1,IRGM	7/364

## Sheet: Δ9 D3 DOWN
GroupID	Category	Term	Description	LogP	Log(q-value)	Genes	Symbols	InTerm_InList
1_Summary	GO Biological Processes	GO:0008033	tRNA processing	-9.17504	-4.82648	8270,11062,23587,55798,57570,79693,79897,80746,83480,113179,339487,348180,5901,27079,29081,79068,221120,5303,90121,129563	LAGE3,DUS4L,ELP5,METTL2B,TRMT5,YRDC,RPP21,TSEN2,PUS3,ADAT3,ZBTB8OS,CTU2,RAN,RPUSD2,METTL5,FTO,ALKBH3,PIN4,TSR2,DIS3L2	20/-
1_Member	GO Biological Processes	GO:0008033	tRNA processing	-9.17504	-4.82648	8270,11062,23587,55798,57570,79693,79897,80746,83480,113179,339487,348180	LAGE3,DUS4L,ELP5,METTL2B,TRMT5,YRDC,RPP21,TSEN2,PUS3,ADAT3,ZBTB8OS,CTU2	12/134
1_Member	GO Biological Processes	GO:0006399	tRNA metabolic process	-7.3548	-3.70521	8270,11062,23587,55798,57570,79693,79897,80746,83480,113179,339487,348180	LAGE3,DUS4L,ELP5,METTL2B,TRMT5,YRDC,RPP21,TSEN2,PUS3,ADAT3,ZBTB8OS,CTU2	12/194
1_Member	Reactome Gene Sets	R-HSA-72306	tRNA processing	-6.78514	-3.25651	5901,8270,57570,79897,80746,83480,113179,339487,348180	RAN,LAGE3,TRMT5,RPP21,TSEN2,PUS3,ADAT3,ZBTB8OS,CTU2	9/107
1_Member	GO Biological Processes	GO:0009451	RNA modification	-6.75997	-3.25651	11062,23587,27079,29081,55798,57570,79068,79693,83480,221120,348180	DUS4L,ELP5,RPUSD2,METTL5,METTL2B,TRMT5,FTO,YRDC,PUS3,ALKBH3,CTU2	11/179
1_Member	GO Biological Processes	GO:0034470	ncRNA processing	-6.69591	-3.25044	5303,8270,11062,23587,27079,29081,55798,57570,79693,79897,80746,83480,90121,113179,339487,348180	PIN4,LAGE3,DUS4L,ELP5,RPUSD2,METTL5,METTL2B,TRMT5,YRDC,RPP21,TSEN2,PUS3,TSR2,ADAT3,ZBTB8OS,CTU2	16/417
1_Member	GO Biological Processes	GO:0034660	ncRNA metabolic process	-6.10773	-2.87312	5303,8270,11062,23587,27079,29081,55798,57570,79693,79897,80746,83480,90121,113179,129563,339487,348180	PIN4,LAGE3,DUS4L,ELP5,RPUSD2,METTL5,METTL2B,TRMT5,YRDC,RPP21,TSEN2,PUS3,TSR2,ADAT3,DIS3L2,ZBTB8OS,CTU2	17/520
1_Member	GO Biological Processes	GO:0006400	tRNA modification	-5.045	-2.26464	11062,23587,55798,57570,79693,83480,348180	DUS4L,ELP5,METTL2B,TRMT5,YRDC,PUS3,CTU2	7/94
1_Member	Reactome Gene Sets	R-HSA-6782315	tRNA modification in the nucleus and cytosol	-4.6875	-2.03791	8270,57570,83480,113179,348180	LAGE3,TRMT5,PUS3,ADAT3,CTU2	5/43
1_Member	GO Biological Processes	GO:0070525	tRNA threonylcarbamoyladenosine metabolic process	-3.3879	-1.19762	8270,57570,79693	LAGE3,TRMT5,YRDC	3/19
2_Summary	GO Biological Processes	GO:0044283	small molecule biosynthetic process	-8.43034	-4.38281	100,1491,2023,2224,2805,3251,3422,3613,4282,5723,7083,11315,29108,29968,51477,55276,84245,140838,283871,159,5198,6611,80150,6647,131,9491	ADA,CTH,ENO1,FDPS,GOT1,HPRT1,IDI1,IMPA2,MIF,PSPH,TK1,PARK7,PYCARD,PSAT1,ISYNA1,PGM2,MRI1,NANP,PGP,ADSS2,PFAS,SMS,ASRGL1,SOD1,ADH7,PSMF1	26/-
2_Member	GO Biological Processes	GO:0044283	small molecule biosynthetic process	-8.43034	-4.38281	100,1491,2023,2224,2805,3251,3422,3613,4282,5723,7083,11315,29108,29968,51477,55276,84245,140838,283871	ADA,CTH,ENO1,FDPS,GOT1,HPRT1,IDI1,IMPA2,MIF,PSPH,TK1,PARK7,PYCARD,PSAT1,ISYNA1,PGM2,MRI1,NANP,PGP	19/456
2_Member	GO Biological Processes	GO:1901605	alpha-amino acid metabolic process	-4.57464	-1.95848	159,1491,2805,5198,5723,6611,29968,80150,84245	ADSS2,CTH,GOT1,PFAS,PSPH,SMS,PSAT1,ASRGL1,MRI1	9/198
2_Member	KEGG Pathway	hsa00270	Cysteine and methionine metabolism	-4.28083	-1.77737	1491,2805,6611,29968,84245	CTH,GOT1,SMS,PSAT1,MRI1	5/52
2_Member	GO Biological Processes	GO:1901607	alpha-amino acid biosynthetic process	-3.75182	-1.42857	1491,2805,5723,29968,84245	CTH,GOT1,PSPH,PSAT1,MRI1	5/67
2_Member	GO Biological Processes	GO:0008652	amino acid biosynthetic process	-3.52152	-1.26287	1491,2805,5723,29968,84245	CTH,GOT1,PSPH,PSAT1,MRI1	5/75
2_Member	GO Biological Processes	GO:0046394	carboxylic acid biosynthetic process	-3.50277	-1.25637	1491,2805,4282,5723,11315,29108,29968,84245,140838	CTH,GOT1,MIF,PSPH,PARK7,PYCARD,PSAT1,MRI1,NANP	9/274
2_Member	GO Biological Processes	GO:0016053	organic acid biosynthetic process	-3.46825	-1.24502	1491,2805,4282,5723,11315,29108,29968,84245,140838	CTH,GOT1,MIF,PSPH,PARK7,PYCARD,PSAT1,MRI1,NANP	9/277
2_Member	GO Biological Processes	GO:0006520	amino acid metabolic process	-3.42296	-1.21706	159,1491,2805,5198,5723,6611,29968,80150,84245	ADSS2,CTH,GOT1,PFAS,PSPH,SMS,PSAT1,ASRGL1,MRI1	9/281
2_Member	GO Biological Processes	GO:0009070	serine family amino acid biosynthetic process	-3.25535	-1.1076	1491,5723,29968	CTH,PSPH,PSAT1	3/21
2_Member	Reactome Gene Sets	R-HSA-1614635	Sulfur amino acid metabolism	-2.83633	-0.832161	1491,2805,84245	CTH,GOT1,MRI1	3/29
2_Member	WikiPathways	WP2525	Trans-sulfuration, one-carbon metabolism and related pathways	-2.70762	-0.753513	1491,5723,6647,29968	CTH,PSPH,SOD1,PSAT1	4/68
2_Member	GO Biological Processes	GO:0000096	sulfur amino acid metabolic process	-2.67214	-0.729649	1491,6611,84245	CTH,SMS,MRI1	3/33
2_Member	GO Biological Processes	GO:0009069	serine family amino acid metabolic process	-2.46298	-0.592984	1491,5723,29968	CTH,PSPH,PSAT1	3/39
2_Member	KEGG Pathway	hsa00260	Glycine, serine and threonine metabolism	-2.43159	-0.572784	1491,5723,29968	CTH,PSPH,PSAT1	3/40
2_Member	WikiPathways	WP3925	Amino acid metabolism	-2.25161	-0.454507	131,1491,2805,6611	ADH7,CTH,GOT1,SMS	4/91
2_Member	Reactome Gene Sets	R-HSA-71291	Metabolism of amino acids and derivatives	-2.02173	-0.297449	1491,2805,5723,6611,9491,29968,80150,84245	CTH,GOT1,PSPH,SMS,PSMF1,PSAT1,ASRGL1,MRI1	8/376
3_Summary	Reactome Gene Sets	R-HSA-15869	Metabolism of nucleotides	-8.24889	-4.37745	100,159,1635,2745,3251,3704,5198,7083,10591,79077,3094,5144,5373,5901,10135,11315,22934,55276,84836,93100,8882,10535,51542,84153,129563,84245,55577,2941	ADA,ADSS2,DCTD,GLRX,HPRT1,ITPA,PFAS,TK1,DNPH1,DCTPP1,HINT1,PDE4D,PMM2,RAN,NAMPT,PARK7,RPIA,PGM2,ABHD14B,NAPRT,ZPR1,RNASEH2A,VPS54,RNASEH2C,DIS3L2,MRI1,NAGK,GSTA4	28/-
3_Member	Reactome Gene Sets	R-HSA-15869	Metabolism of nucleotides	-8.24889	-4.37745	100,159,1635,2745,3251,3704,5198,7083,10591,79077	ADA,ADSS2,DCTD,GLRX,HPRT1,ITPA,PFAS,TK1,DNPH1,DCTPP1	10/99
3_Member	GO Biological Processes	GO:0055086	nucleobase-containing small molecule metabolic process	-7.78612	-4.03962	100,159,1635,2745,3094,3251,3704,5144,5198,5373,5901,7083,10135,10591,11315,22934,55276,79077,84836,93100	ADA,ADSS2,DCTD,GLRX,HINT1,HPRT1,ITPA,PDE4D,PFAS,PMM2,RAN,TK1,NAMPT,DNPH1,PARK7,RPIA,PGM2,DCTPP1,ABHD14B,NAPRT	20/555
3_Member	GO Biological Processes	GO:0006753	nucleoside phosphate metabolic process	-6.50144	-3.10713	100,159,1635,3094,3251,3704,5144,5198,5901,7083,10135,10591,11315,22934,79077,84836,93100	ADA,ADSS2,DCTD,HINT1,HPRT1,ITPA,PDE4D,PFAS,RAN,TK1,NAMPT,DNPH1,PARK7,RPIA,DCTPP1,ABHD14B,NAPRT	17/487
3_Member	WikiPathways	WP4224	Purine metabolism and related disorders	-6.19268	-2.89775	100,159,3251,3704,5198	ADA,ADSS2,HPRT1,ITPA,PFAS	5/22
3_Member	GO Biological Processes	GO:0009117	nucleotide metabolic process	-5.91238	-2.73991	100,159,1635,3094,3251,3704,5144,5198,5901,10135,10591,11315,22934,79077,84836,93100	ADA,ADSS2,DCTD,HINT1,HPRT1,ITPA,PDE4D,PFAS,RAN,NAMPT,DNPH1,PARK7,RPIA,DCTPP1,ABHD14B,NAPRT	16/478
3_Member	GO Biological Processes	GO:0009166	nucleotide catabolic process	-5.66402	-2.54591	100,3094,3251,3704,5144,10591,79077	ADA,HINT1,HPRT1,ITPA,PDE4D,DNPH1,DCTPP1	7/76
3_Member	WikiPathways	WP4792	Purine metabolism	-5.61897	-2.52569	100,159,3251,3704	ADA,ADSS2,HPRT1,ITPA	4/13
3_Member	GO Biological Processes	GO:0034655	nucleobase-containing compound catabolic process	-5.53931	-2.46951	100,3094,3251,3704,5144,8882,10535,10591,51542,79077,84153,129563	ADA,HINT1,HPRT1,ITPA,PDE4D,ZPR1,RNASEH2A,DNPH1,VPS54,DCTPP1,RNASEH2C,DIS3L2	12/287
3_Member	GO Biological Processes	GO:0006195	purine nucleotide catabolic process	-5.50619	-2.45866	100,3094,3251,3704,5144,10591	ADA,HINT1,HPRT1,ITPA,PDE4D,DNPH1	6/52
3_Member	GO Biological Processes	GO:0006167	AMP biosynthetic process	-5.4755	-2.44916	100,159,3251,5198	ADA,ADSS2,HPRT1,PFAS	4/14
3_Member	GO Biological Processes	GO:0043094	cellular metabolic compound salvage	-5.40775	-2.40161	100,3251,55276,84245,93100	ADA,HPRT1,PGM2,MRI1,NAPRT	5/31
3_Member	GO Biological Processes	GO:0043101	purine-containing compound salvage	-5.34346	-2.38544	100,3251,55276,93100	ADA,HPRT1,PGM2,NAPRT	4/15
3_Member	GO Biological Processes	GO:1901292	nucleoside phosphate catabolic process	-5.33606	-2.38544	100,3094,3251,3704,5144,10591,79077	ADA,HINT1,HPRT1,ITPA,PDE4D,DNPH1,DCTPP1	7/85
3_Member	KEGG Pathway	hsa01232	Nucleotide metabolism	-5.33606	-2.38544	100,159,1635,3251,3704,7083,79077	ADA,ADSS2,DCTD,HPRT1,ITPA,TK1,DCTPP1	7/85
3_Member	GO Biological Processes	GO:0072523	purine-containing compound catabolic process	-5.26923	-2.36783	100,3094,3251,3704,5144,10591	ADA,HINT1,HPRT1,ITPA,PDE4D,DNPH1	6/57
3_Member	GO Biological Processes	GO:0009163	nucleoside biosynthetic process	-5.10733	-2.30284	100,3251,7083,55276	ADA,HPRT1,TK1,PGM2	4/17
3_Member	GO Biological Processes	GO:0034404	nucleobase-containing small molecule biosynthetic process	-5.10733	-2.30284	100,3251,7083,55276	ADA,HPRT1,TK1,PGM2	4/17
3_Member	GO Biological Processes	GO:0044270	cellular nitrogen compound catabolic process	-4.97818	-2.21825	100,3094,3251,3704,5144,8882,10535,10591,51542,79077,84153,129563	ADA,HINT1,HPRT1,ITPA,PDE4D,ZPR1,RNASEH2A,DNPH1,VPS54,DCTPP1,RNASEH2C,DIS3L2	12/326
3_Member	GO Biological Processes	GO:0046700	heterocycle catabolic process	-4.95166	-2.21588	100,3094,3251,3704,5144,8882,10535,10591,51542,79077,84153,129563	ADA,HINT1,HPRT1,ITPA,PDE4D,ZPR1,RNASEH2A,DNPH1,VPS54,DCTPP1,RNASEH2C,DIS3L2	12/328
3_Member	GO Biological Processes	GO:0072521	purine-containing compound metabolic process	-4.88361	-2.15831	100,159,3094,3251,3704,5144,5198,5901,10135,10591,22934,55276,84836,93100	ADA,ADSS2,HINT1,HPRT1,ITPA,PDE4D,PFAS,RAN,NAMPT,DNPH1,RPIA,PGM2,ABHD14B,NAPRT	14/450
3_Member	GO Biological Processes	GO:0009168	purine ribonucleoside monophosphate biosynthetic process	-4.80657	-2.11122	100,159,3251,5198	ADA,ADSS2,HPRT1,PFAS	4/20
3_Member	GO Biological Processes	GO:0009124	nucleoside monophosphate biosynthetic process	-4.73844	-2.06675	100,159,3251,5198,7083	ADA,ADSS2,HPRT1,PFAS,TK1	5/42
3_Member	GO Biological Processes	GO:0019439	aromatic compound catabolic process	-4.73406	-2.06675	100,3094,3251,3704,5144,8882,10535,10591,51542,79077,84153,129563	ADA,HINT1,HPRT1,ITPA,PDE4D,ZPR1,RNASEH2A,DNPH1,VPS54,DCTPP1,RNASEH2C,DIS3L2	12/345
3_Member	GO Biological Processes	GO:0009154	purine ribonucleotide catabolic process	-4.6875	-2.03791	100,3094,3251,3704,5144	ADA,HINT1,HPRT1,ITPA,PDE4D	5/43
3_Member	GO Biological Processes	GO:0009127	purine nucleoside monophosphate biosynthetic process	-4.63295	-2.0004	100,159,3251,5198	ADA,ADSS2,HPRT1,PFAS	4/22
3_Member	GO Biological Processes	GO:1901659	glycosyl compound biosynthetic process	-4.55263	-1.95756	100,3251,7083,55276	ADA,HPRT1,TK1,PGM2	4/23
3_Member	GO Biological Processes	GO:0006163	purine nucleotide metabolic process	-4.55073	-1.95756	100,159,3094,3251,3704,5144,5198,5901,10135,10591,22934,84836,93100	ADA,ADSS2,HINT1,HPRT1,ITPA,PDE4D,PFAS,RAN,NAMPT,DNPH1,RPIA,ABHD14B,NAPRT	13/420
3_Member	GO Biological Processes	GO:0009123	nucleoside monophosphate metabolic process	-4.54269	-1.95756	100,159,3251,5198,7083,10591	ADA,ADSS2,HPRT1,PFAS,TK1,DNPH1	6/76
3_Member	GO Biological Processes	GO:0009261	ribonucleotide catabolic process	-4.40708	-1.86738	100,3094,3251,3704,5144	ADA,HINT1,HPRT1,ITPA,PDE4D	5/49
3_Member	GO Biological Processes	GO:0046033	AMP metabolic process	-4.40303	-1.86738	100,159,3251,5198	ADA,ADSS2,HPRT1,PFAS	4/25
3_Member	GO Biological Processes	GO:1901361	organic cyclic compound catabolic process	-4.37004	-1.85399	100,3094,3251,3704,5144,8882,10535,10591,51542,79077,84153,129563	ADA,HINT1,HPRT1,ITPA,PDE4D,ZPR1,RNASEH2A,DNPH1,VPS54,DCTPP1,RNASEH2C,DIS3L2	12/376
3_Member	KEGG Pathway	hsa00230	Purine metabolism	-4.17648	-1.70873	100,159,3251,3704,5144,5198,55276	ADA,ADSS2,HPRT1,ITPA,PDE4D,PFAS,PGM2	7/128
3_Member	GO Biological Processes	GO:0032261	purine nucleotide salvage	-4.13677	-1.70442	100,3251,93100	ADA,HPRT1,NAPRT	3/11
3_Member	GO Biological Processes	GO:0042451	purine nucleoside biosynthetic process	-4.13677	-1.70442	100,3251,55276	ADA,HPRT1,PGM2	3/11
3_Member	GO Biological Processes	GO:0042455	ribonucleoside biosynthetic process	-4.13677	-1.70442	100,3251,55276	ADA,HPRT1,PGM2	3/11
3_Member	GO Biological Processes	GO:0046129	purine ribonucleoside biosynthetic process	-4.13677	-1.70442	100,3251,55276	ADA,HPRT1,PGM2	3/11
3_Member	GO Biological Processes	GO:0009116	nucleoside metabolic process	-4.12455	-1.70027	100,3251,7083,10591,55276	ADA,HPRT1,TK1,DNPH1,PGM2	5/56
3_Member	GO Biological Processes	GO:0046434	organophosphate catabolic process	-3.99066	-1.60114	100,3094,3251,3704,5144,10591,79077	ADA,HINT1,HPRT1,ITPA,PDE4D,DNPH1,DCTPP1	7/137
3_Member	GO Biological Processes	GO:0009143	nucleoside triphosphate catabolic process	-3.90289	-1.5411	100,3704,79077	ADA,ITPA,DCTPP1	3/13
3_Member	GO Biological Processes	GO:0009156	ribonucleoside monophosphate biosynthetic process	-3.86265	-1.50531	100,159,3251,5198	ADA,ADSS2,HPRT1,PFAS	4/34
3_Member	GO Biological Processes	GO:0006177	GMP biosynthetic process	-3.80065	-1.46069	100,3251,5198	ADA,HPRT1,PFAS	3/14
3_Member	GO Biological Processes	GO:0009167	purine ribonucleoside monophosphate metabolic process	-3.50112	-1.25637	100,159,3251,5198	ADA,ADSS2,HPRT1,PFAS	4/42
3_Member	GO Biological Processes	GO:0009125	nucleoside monophosphate catabolic process	-3.46004	-1.24502	100,3251,10591	ADA,HPRT1,DNPH1	3/18
3_Member	GO Biological Processes	GO:0043173	nucleotide salvage	-3.46004	-1.24502	100,3251,93100	ADA,HPRT1,NAPRT	3/18
3_Member	GO Biological Processes	GO:0046040	IMP metabolic process	-3.46004	-1.24502	159,3251,5198	ADSS2,HPRT1,PFAS	3/18
3_Member	GO Biological Processes	GO:0009126	purine nucleoside monophosphate metabolic process	-3.4226	-1.21706	100,159,3251,5198	ADA,ADSS2,HPRT1,PFAS	4/44
3_Member	GO Biological Processes	GO:1901136	carbohydrate derivative catabolic process	-3.39961	-1.19762	100,3094,3251,3704,5144,55577,79077	ADA,HINT1,HPRT1,ITPA,PDE4D,NAGK,DCTPP1	7/171
3_Member	GO Biological Processes	GO:1901657	glycosyl compound metabolic process	-3.31746	-1.14523	100,3251,7083,10591,55276	ADA,HPRT1,TK1,DNPH1,PGM2	5/83
3_Member	GO Biological Processes	GO:0046128	purine ribonucleoside metabolic process	-3.25535	-1.1076	100,3251,55276	ADA,HPRT1,PGM2	3/21
3_Member	GO Biological Processes	GO:0019693	ribose phosphate metabolic process	-3.1741	-1.05854	100,159,3094,3251,3704,5144,5198,5901,22934,84836	ADA,ADSS2,HINT1,HPRT1,ITPA,PDE4D,PFAS,RAN,RPIA,ABHD14B	10/369
3_Member	Reactome Gene Sets	R-HSA-8956321	Nucleotide salvage	-3.13596	-1.03292	100,3251,7083	ADA,HPRT1,TK1	3/23
3_Member	GO Biological Processes	GO:0009162	deoxyribonucleoside monophosphate metabolic process	-3.08046	-0.994353	100,7083,10591	ADA,TK1,DNPH1	3/24
3_Member	GO Biological Processes	GO:0042278	purine nucleoside metabolic process	-2.97667	-0.918146	100,3251,55276	ADA,HPRT1,PGM2	3/26
3_Member	GO Biological Processes	GO:0009161	ribonucleoside monophosphate metabolic process	-2.9367	-0.899101	100,159,3251,5198	ADA,ADSS2,HPRT1,PFAS	4/59
3_Member	GO Biological Processes	GO:1901293	nucleoside phosphate biosynthetic process	-2.93559	-0.899101	100,159,1635,3251,5198,7083,10135,93100	ADA,ADSS2,DCTD,HPRT1,PFAS,TK1,NAMPT,NAPRT	8/265
3_Member	GO Biological Processes	GO:0046037	GMP metabolic process	-2.928	-0.897508	100,3251,5198	ADA,HPRT1,PFAS	3/27
3_Member	GO Biological Processes	GO:0009150	purine ribonucleotide metabolic process	-2.82969	-0.829435	100,159,3094,3251,3704,5144,5198,5901,84836	ADA,ADSS2,HINT1,HPRT1,ITPA,PDE4D,PFAS,RAN,ABHD14B	9/341
3_Member	GO Biological Processes	GO:0009259	ribonucleotide metabolic process	-2.66997	-0.729649	100,159,3094,3251,3704,5144,5198,5901,84836	ADA,ADSS2,HINT1,HPRT1,ITPA,PDE4D,PFAS,RAN,ABHD14B	9/360
3_Member	GO Biological Processes	GO:0009119	ribonucleoside metabolic process	-2.59806	-0.682351	100,3251,55276	ADA,HPRT1,PGM2	3/35
3_Member	GO Biological Processes	GO:0072522	purine-containing compound biosynthetic process	-2.56836	-0.666962	100,159,3251,5198,10135,55276,93100	ADA,ADSS2,HPRT1,PFAS,NAMPT,PGM2,NAPRT	7/238
3_Member	KEGG Pathway	hsa00983	Drug metabolism - other enzymes	-2.45077	-0.582214	2941,3251,3704,7083	GSTA4,HPRT1,ITPA,TK1	4/80
3_Member	GO Biological Processes	GO:0009165	nucleotide biosynthetic process	-2.33122	-0.50118	100,159,1635,3251,5198,10135,93100	ADA,ADSS2,DCTD,HPRT1,PFAS,NAMPT,NAPRT	7/263
3_Member	GO Biological Processes	GO:0006164	purine nucleotide biosynthetic process	-2.03432	-0.306939	100,159,3251,5198,10135,93100	ADA,ADSS2,HPRT1,PFAS,NAMPT,NAPRT	6/229
4_Summary	GO Biological Processes	GO:0045104	intermediate filament cytoskeleton organization	-6.2033	-2.89775	3860,3861,3872,3875,3880,4287,6647,51542,3856,11187,2810,3664,5144,8796,9693,10152,10591	KRT13,KRT14,KRT17,KRT18,KRT19,ATXN3,SOD1,VPS54,KRT8,PKP3,SFN,IRF6,PDE4D,SCEL,RAPGEF2,ABI2,DNPH1	17/-
4_Member	GO Biological Processes	GO:0045104	intermediate filament cytoskeleton organization	-6.2033	-2.89775	3860,3861,3872,3875,3880,4287,6647,51542	KRT13,KRT14,KRT17,KRT18,KRT19,ATXN3,SOD1,VPS54	8/92
4_Member	GO Biological Processes	GO:0045103	intermediate filament-based process	-6.16713	-2.89775	3860,3861,3872,3875,3880,4287,6647,51542	KRT13,KRT14,KRT17,KRT18,KRT19,ATXN3,SOD1,VPS54	8/93
4_Member	Reactome Gene Sets	R-HSA-6809371	Formation of the cornified envelope	-4.1339	-1.70442	3856,3860,3861,3872,3875,3880,11187	KRT8,KRT13,KRT14,KRT17,KRT18,KRT19,PKP3	7/130
4_Member	KEGG Pathway	hsa05150	Staphylococcus aureus infection	-3.02956	-0.959905	3860,3861,3872,3875,3880	KRT13,KRT14,KRT17,KRT18,KRT19	5/96
4_Member	Reactome Gene Sets	R-HSA-6805567	Keratinization	-2.81673	-0.820353	3856,3860,3861,3872,3875,3880,11187	KRT8,KRT13,KRT14,KRT17,KRT18,KRT19,PKP3	7/215
4_Member	GO Biological Processes	GO:0045109	intermediate filament organization	-2.59475	-0.682351	3860,3861,3872,3880	KRT13,KRT14,KRT17,KRT19	4/73
4_Member	GO Biological Processes	GO:0030855	epithelial cell differentiation	-2.44926	-0.582145	2810,3664,3860,3861,3872,3880,5144,6647,8796,9693,10152,10591	SFN,IRF6,KRT13,KRT14,KRT17,KRT19,PDE4D,SOD1,SCEL,RAPGEF2,ABI2,DNPH1	12/620
4_Member	KEGG Pathway	hsa04915	Estrogen signaling pathway	-2.34117	-0.507157	3860,3861,3872,3875,3880	KRT13,KRT14,KRT17,KRT18,KRT19	5/138
4_Member	GO Biological Processes	GO:0009913	epidermal cell differentiation	-2.32199	-0.495816	2810,3664,3861,3872,6647,8796	SFN,IRF6,KRT14,KRT17,SOD1,SCEL	6/199
4_Member	GO Biological Processes	GO:0030216	keratinocyte differentiation	-2.27624	-0.465505	2810,3664,3861,3872,8796	SFN,IRF6,KRT14,KRT17,SCEL	5/143
5_Summary	GO Biological Processes	GO:0006259	DNA metabolic process	-6.03844	-2.83601	1111,3148,3364,4287,5395,5810,5901,7083,7323,7336,8882,10535,11315,23411,29089,51542,79068,79077,84153,124512,221120,2810,4282,29108,79624,7534,9491,6612,56984,1978	CHEK1,HMGB2,HUS1,ATXN3,PMS2,RAD1,RAN,TK1,UBE2D3,UBE2V2,ZPR1,RNASEH2A,PARK7,SIRT1,UBE2T,VPS54,FTO,DCTPP1,RNASEH2C,METTL23,ALKBH3,SFN,MIF,PYCARD,ARMT1,YWHAZ,PSMF1,SUMO3,PSMG2,EIF4EBP1	30/-
5_Member	GO Biological Processes	GO:0006259	DNA metabolic process	-6.03844	-2.83601	1111,3148,3364,4287,5395,5810,5901,7083,7323,7336,8882,10535,11315,23411,29089,51542,79068,79077,84153,124512,221120	CHEK1,HMGB2,HUS1,ATXN3,PMS2,RAD1,RAN,TK1,UBE2D3,UBE2V2,ZPR1,RNASEH2A,PARK7,SIRT1,UBE2T,VPS54,FTO,DCTPP1,RNASEH2C,METTL23,ALKBH3	21/780
5_Member	GO Biological Processes	GO:0006974	DNA damage response	-5.10983	-2.30284	1111,2810,3148,3364,4282,4287,5395,5810,7323,7336,10535,11315,23411,29089,29108,79068,79624,84153,221120	CHEK1,SFN,HMGB2,HUS1,MIF,ATXN3,PMS2,RAD1,UBE2D3,UBE2V2,RNASEH2A,PARK7,SIRT1,UBE2T,PYCARD,FTO,ARMT1,RNASEH2C,ALKBH3	19/753
5_Member	GO Biological Processes	GO:0006281	DNA repair	-4.97575	-2.21825	1111,3148,3364,4287,5395,5810,7323,7336,10535,11315,23411,29089,79068,84153,221120	CHEK1,HMGB2,HUS1,ATXN3,PMS2,RAD1,UBE2D3,UBE2V2,RNASEH2A,PARK7,SIRT1,UBE2T,FTO,RNASEH2C,ALKBH3	15/503
5_Member	WikiPathways	WP3875	ATR signaling	-4.42498	-1.86881	1111,3364,5810	CHEK1,HUS1,RAD1	3/9
5_Member	Reactome Gene Sets	R-HSA-69473	G2/M DNA damage checkpoint	-4.02208	-1.61801	1111,2810,3364,5810,7336,7534	CHEK1,SFN,HUS1,RAD1,UBE2V2,YWHAZ	6/94
5_Member	Canonical Pathways	M46	PID ATR PATHWAY	-3.62701	-1.33915	1111,3364,5810,7534	CHEK1,HUS1,RAD1,YWHAZ	4/39
5_Member	Reactome Gene Sets	R-HSA-69481	G2/M Checkpoints	-3.46154	-1.24502	1111,2810,3364,5810,7336,7534,9491	CHEK1,SFN,HUS1,RAD1,UBE2V2,YWHAZ,PSMF1	7/167
5_Member	Canonical Pathways	M1	PID FANCONI PATHWAY	-3.31194	-1.14523	1111,3364,5810,29089	CHEK1,HUS1,RAD1,UBE2T	4/47
5_Member	Reactome Gene Sets	R-HSA-73894	DNA Repair	-2.88263	-0.867164	1111,3364,5395,5810,6612,7336,29089,79068,221120	CHEK1,HUS1,PMS2,RAD1,SUMO3,UBE2V2,UBE2T,FTO,ALKBH3	9/335
5_Member	Reactome Gene Sets	R-HSA-176187	Activation of ATR in response to replication stress	-2.5285	-0.64533	1111,3364,5810	CHEK1,HUS1,RAD1	3/37
5_Member	Reactome Gene Sets	R-HSA-5693616	Presynaptic phase of homologous DNA pairing and strand exchange	-2.43159	-0.572784	1111,3364,5810	CHEK1,HUS1,RAD1	3/40
5_Member	WikiPathways	WP4016	DNA IR-damage and cellular response via ATR	-2.43138	-0.572784	1111,3364,5810,7323	CHEK1,HUS1,RAD1,UBE2D3	4/81
5_Member	Reactome Gene Sets	R-HSA-5693579	Homologous DNA Pairing and Strand Exchange	-2.34241	-0.507157	1111,3364,5810	CHEK1,HUS1,RAD1	3/43
5_Member	GO Biological Processes	GO:0051784	negative regulation of nuclear division	-2.23371	-0.441456	1111,5810,56984	CHEK1,RAD1,PSMG2	3/47
5_Member	Reactome Gene Sets	R-HSA-5693607	Processing of DNA double-strand break ends	-2.1545	-0.383306	1111,3364,5810,7336	CHEK1,HUS1,RAD1,UBE2V2	4/97
5_Member	Reactome Gene Sets	R-HSA-9675135	Diseases of DNA repair	-2.1349	-0.367265	3364,5395,5810	HUS1,PMS2,RAD1	3/51
5_Member	KEGG Pathway	hsa04218	Cellular senescence	-2.11972	-0.357748	1111,1978,3364,5810,23411	CHEK1,EIF4EBP1,HUS1,RAD1,SIRT1	5/156
5_Member	Reactome Gene Sets	R-HSA-69620	Cell Cycle Checkpoints	-2.08322	-0.337808	1111,2810,3364,5810,7336,7534,9491	CHEK1,SFN,HUS1,RAD1,UBE2V2,YWHAZ,PSMF1	7/293
6_Summary	KEGG Pathway	hsa01230	Biosynthesis of amino acids	-5.70312	-2.55868	1491,2023,2597,2805,5723,22934,29968,283871,2171,5373,55276,283209,131,218,55577,140838,3658,7083	CTH,ENO1,GAPDH,GOT1,PSPH,RPIA,PSAT1,PGP,FABP5,PMM2,PGM2,PGM2L1,ADH7,ALDH3A1,NAGK,NANP,IREB2,TK1	18/-
6_Member	KEGG Pathway	hsa01230	Biosynthesis of amino acids	-5.70312	-2.55868	1491,2023,2597,2805,5723,22934,29968	CTH,ENO1,GAPDH,GOT1,PSPH,RPIA,PSAT1	7/75
6_Member	WikiPathways	WP4290	Metabolic reprogramming in colon cancer	-4.73844	-2.06675	2023,2597,5723,22934,29968	ENO1,GAPDH,PSPH,RPIA,PSAT1	5/42
6_Member	KEGG Pathway	hsa01200	Carbon metabolism	-4.4734	-1.90299	2023,2597,2805,5723,22934,29968,283871	ENO1,GAPDH,GOT1,PSPH,RPIA,PSAT1,PGP	7/115
6_Member	GO Biological Processes	GO:0005996	monosaccharide metabolic process	-3.92687	-1.55604	2023,2171,2597,2805,5373,22934,55276,283209	ENO1,FABP5,GAPDH,GOT1,PMM2,RPIA,PGM2,PGM2L1	8/188
6_Member	KEGG Pathway	hsa00010	Glycolysis / Gluconeogenesis	-3.75182	-1.42857	131,218,2023,2597,55276	ADH7,ALDH3A1,ENO1,GAPDH,PGM2	5/67
6_Member	GO Biological Processes	GO:0019318	hexose metabolic process	-3.59091	-1.3179	2023,2171,2597,2805,5373,55276,283209	ENO1,FABP5,GAPDH,GOT1,PMM2,PGM2,PGM2L1	7/159
6_Member	GO Biological Processes	GO:0006006	glucose metabolic process	-3.48204	-1.24502	2023,2171,2597,2805,55276,283209	ENO1,FABP5,GAPDH,GOT1,PGM2,PGM2L1	6/118
6_Member	WikiPathways	WP4018	Clear cell renal cell carcinoma pathways	-3.24664	-1.1076	2023,2597,5723,29968,55276	ENO1,GAPDH,PSPH,PSAT1,PGM2	5/86
6_Member	GO Biological Processes	GO:0005975	carbohydrate metabolic process	-3.14034	-1.03292	2023,2171,2597,2805,5373,22934,55276,55577,140838,283209,283871	ENO1,FABP5,GAPDH,GOT1,PMM2,RPIA,PGM2,NAGK,NANP,PGM2L1,PGP	11/441
6_Member	Reactome Gene Sets	R-HSA-70326	Glucose metabolism	-3.09185	-0.998562	2023,2597,2805,283209,283871	ENO1,GAPDH,GOT1,PGM2L1,PGP	5/93
6_Member	Reactome Gene Sets	R-HSA-70263	Gluconeogenesis	-2.59806	-0.682351	2023,2597,2805	ENO1,GAPDH,GOT1	3/35
6_Member	Reactome Gene Sets	R-HSA-70171	Glycolysis	-2.59475	-0.682351	2023,2597,283209,283871	ENO1,GAPDH,PGM2L1,PGP	4/73
6_Member	Canonical Pathways	M66	PID MYC ACTIV PATHWAY	-2.47043	-0.597541	2023,2597,3658,7083	ENO1,GAPDH,IREB2,TK1	4/79
6_Member	WikiPathways	WP534	Glycolysis and gluconeogenesis	-2.28671	-0.472404	2023,2597,2805	ENO1,GAPDH,GOT1	3/45
6_Member	Reactome Gene Sets	R-HSA-71387	Metabolism of carbohydrates	-2.05275	-0.314851	2023,2597,2805,22934,55276,283209,283871	ENO1,GAPDH,GOT1,RPIA,PGM2,PGM2L1,PGP	7/297
7_Summary	GO Biological Processes	GO:0030029	actin filament-based process	-5.30245	-2.36886	3856,3880,3993,4205,4287,5901,7114,8936,9168,10152,23242,29085,54874,54961,55561,57698,90627,2280,3860,3861,3872,11075,27229,51673	KRT8,KRT19,LLGL2,MEF2A,ATXN3,RAN,TMSB4X,WASF1,TMSB10,ABI2,COBL,PHPT1,FNBP1L,SSH3,CDC42BPG,SHTN1,STARD13,FKBP1A,KRT13,KRT14,KRT17,STMN2,TUBGCP4,TPPP3	24/-
7_Member	GO Biological Processes	GO:0030029	actin filament-based process	-5.30245	-2.36886	3856,3880,3993,4205,4287,5901,7114,8936,9168,10152,23242,29085,54874,54961,55561,57698,90627	KRT8,KRT19,LLGL2,MEF2A,ATXN3,RAN,TMSB4X,WASF1,TMSB10,ABI2,COBL,PHPT1,FNBP1L,SSH3,CDC42BPG,SHTN1,STARD13	17/597
7_Member	GO Biological Processes	GO:0030036	actin cytoskeleton organization	-5.27706	-2.36783	3856,3880,3993,4205,4287,5901,7114,8936,9168,10152,23242,29085,54961,55561,57698,90627	KRT8,KRT19,LLGL2,MEF2A,ATXN3,RAN,TMSB4X,WASF1,TMSB10,ABI2,COBL,PHPT1,SSH3,CDC42BPG,SHTN1,STARD13	16/536
7_Member	GO Biological Processes	GO:0097435	supramolecular fiber organization	-4.95428	-2.21588	2280,3856,3860,3861,3872,3880,4205,7114,8936,9168,10152,11075,23242,27229,51673,57698	FKBP1A,KRT8,KRT13,KRT14,KRT17,KRT19,MEF2A,TMSB4X,WASF1,TMSB10,ABI2,STMN2,COBL,TUBGCP4,TPPP3,SHTN1	16/569
8_Summary	GO Biological Processes	GO:0090407	organophosphate biosynthetic process	-5.22649	-2.35318	100,159,1635,2171,2224,3251,3422,3613,5198,7083,8525,8871,10135,51477,84962,93100,2805,11315,283871,29968,1622,3633,131,23411	ADA,ADSS2,DCTD,FABP5,FDPS,HPRT1,IDI1,IMPA2,PFAS,TK1,DGKZ,SYNJ2,NAMPT,ISYNA1,AJUBA,NAPRT,GOT1,PARK7,PGP,PSAT1,DBI,INPP5B,ADH7,SIRT1	24/-
8_Member	GO Biological Processes	GO:0090407	organophosphate biosynthetic process	-5.22649	-2.35318	100,159,1635,2171,2224,3251,3422,3613,5198,7083,8525,8871,10135,51477,84962,93100	ADA,ADSS2,DCTD,FABP5,FDPS,HPRT1,IDI1,IMPA2,PFAS,TK1,DGKZ,SYNJ2,NAMPT,ISYNA1,AJUBA,NAPRT	16/541
8_Member	GO Biological Processes	GO:0046165	alcohol biosynthetic process	-5.045	-2.26464	2224,2805,3422,3613,11315,51477,283871	FDPS,GOT1,IDI1,IMPA2,PARK7,ISYNA1,PGP	7/94
8_Member	GO Biological Processes	GO:1901617	organic hydroxy compound biosynthetic process	-4.19608	-1.72258	2224,2805,3422,3613,11315,29968,51477,283871	FDPS,GOT1,IDI1,IMPA2,PARK7,PSAT1,ISYNA1,PGP	8/172
8_Member	GO Biological Processes	GO:0006644	phospholipid metabolic process	-3.92759	-1.55604	1622,2171,2224,3422,3613,3633,8525,8871,51477,84962,283871	DBI,FABP5,FDPS,IDI1,IMPA2,INPP5B,DGKZ,SYNJ2,ISYNA1,AJUBA,PGP	11/356
8_Member	Reactome Gene Sets	R-HSA-1855183	Synthesis of IP2, IP, and Ins in the cytosol	-3.80065	-1.46069	3613,3633,51477	IMPA2,INPP5B,ISYNA1	3/14
8_Member	GO Biological Processes	GO:0046173	polyol biosynthetic process	-3.31194	-1.14523	2805,3613,51477,283871	GOT1,IMPA2,ISYNA1,PGP	4/47
8_Member	GO Biological Processes	GO:0008654	phospholipid biosynthetic process	-3.16643	-1.0534	2171,2224,3422,3613,8525,8871,51477,84962	FABP5,FDPS,IDI1,IMPA2,DGKZ,SYNJ2,ISYNA1,AJUBA	8/244
8_Member	GO Biological Processes	GO:0019751	polyol metabolic process	-3.07083	-0.991786	2805,3613,3633,51477,283871	GOT1,IMPA2,INPP5B,ISYNA1,PGP	5/94
8_Member	GO Biological Processes	GO:0006066	alcohol metabolic process	-2.98304	-0.920038	131,2224,2805,3422,3613,3633,11315,51477,283871	ADH7,FDPS,GOT1,IDI1,IMPA2,INPP5B,PARK7,ISYNA1,PGP	9/324
8_Member	GO Biological Processes	GO:1901615	organic hydroxy compound metabolic process	-2.87362	-0.863514	131,2224,2805,3251,3422,3613,3633,11315,29968,51477,283871	ADH7,FDPS,GOT1,HPRT1,IDI1,IMPA2,INPP5B,PARK7,PSAT1,ISYNA1,PGP	11/476
8_Member	GO Biological Processes	GO:0006650	glycerophospholipid metabolic process	-2.74611	-0.777629	1622,2171,3613,3633,8525,8871,84962,283871	DBI,FABP5,IMPA2,INPP5B,DGKZ,SYNJ2,AJUBA,PGP	8/284
8_Member	GO Biological Processes	GO:0046486	glycerolipid metabolic process	-2.74417	-0.777629	1622,2171,3613,3633,8525,8871,23411,84962,283871	DBI,FABP5,IMPA2,INPP5B,DGKZ,SYNJ2,SIRT1,AJUBA,PGP	9/351
8_Member	KEGG Pathway	hsa00562	Inositol phosphate metabolism	-2.59475	-0.682351	3613,3633,8871,51477	IMPA2,INPP5B,SYNJ2,ISYNA1	4/73
8_Member	Reactome Gene Sets	R-HSA-1483249	Inositol phosphate metabolism	-2.15876	-0.384238	3613,3633,51477	IMPA2,INPP5B,ISYNA1	3/50
8_Member	KEGG Pathway	hsa04070	Phosphatidylinositol signaling system	-2.1545	-0.383306	3613,3633,8525,8871	IMPA2,INPP5B,DGKZ,SYNJ2	4/97
9_Summary	GO Biological Processes	GO:0033209	tumor necrosis factor-mediated signaling pathway	-5.22462	-2.35318	3856,3875,7114,7186,29108,84817,3476,23411,54469,100,6885,51571,338322,489,2810,3094,3148,79017,4282,2597,5144,6647,11315,1491,4502,54836,57539	KRT8,KRT18,TMSB4X,TRAF2,PYCARD,TXNDC17,IGBP1,SIRT1,ZFAND6,ADA,MAP3K7,CYRIB,NLRP10,ATP2A3,SFN,HINT1,HMGB2,GGCT,MIF,GAPDH,PDE4D,SOD1,PARK7,CTH,MT2A,BSPRY,WDR35	27/-
9_Member	GO Biological Processes	GO:0033209	tumor necrosis factor-mediated signaling pathway	-5.22462	-2.35318	3856,3875,7114,7186,29108,84817	KRT8,KRT18,TMSB4X,TRAF2,PYCARD,TXNDC17	6/58
9_Member	GO Biological Processes	GO:0034612	response to tumor necrosis factor	-4.37487	-1.85399	3476,3856,3875,7114,7186,23411,29108,54469,84817	IGBP1,KRT8,KRT18,TMSB4X,TRAF2,SIRT1,PYCARD,ZFAND6,TXNDC17	9/210
9_Member	GO Biological Processes	GO:0002821	positive regulation of adaptive immune response	-4.15509	-1.70442	100,6885,7186,23411,29108,51571,338322	ADA,MAP3K7,TRAF2,SIRT1,PYCARD,CYRIB,NLRP10	7/129
9_Member	GO Biological Processes	GO:0071356	cellular response to tumor necrosis factor	-3.99154	-1.60114	3856,3875,7114,7186,23411,29108,54469,84817	KRT8,KRT18,TMSB4X,TRAF2,SIRT1,PYCARD,ZFAND6,TXNDC17	8/184
9_Member	GO Biological Processes	GO:0097190	apoptotic signaling pathway	-3.76927	-1.43354	489,2810,3094,3148,3856,3875,7186,23411,29108,79017	ATP2A3,SFN,HINT1,HMGB2,KRT8,KRT18,TRAF2,SIRT1,PYCARD,GGCT	10/310
9_Member	GO Biological Processes	GO:0002720	positive regulation of cytokine production involved in immune response	-3.36631	-1.18507	4282,6885,7186,23411,29108	MIF,MAP3K7,TRAF2,SIRT1,PYCARD	5/81
9_Member	GO Biological Processes	GO:0001819	positive regulation of cytokine production	-3.25307	-1.1076	2597,3148,4282,5144,6647,6885,7186,11315,23411,29108,51571,338322	GAPDH,HMGB2,MIF,PDE4D,SOD1,MAP3K7,TRAF2,PARK7,SIRT1,PYCARD,CYRIB,NLRP10	12/497
9_Member	GO Biological Processes	GO:0002819	regulation of adaptive immune response	-2.93542	-0.899101	100,6885,7186,23411,29108,51571,338322	ADA,MAP3K7,TRAF2,SIRT1,PYCARD,CYRIB,NLRP10	7/205
9_Member	GO Biological Processes	GO:0097193	intrinsic apoptotic signaling pathway	-2.77689	-0.791945	489,2810,3094,7186,23411,29108	ATP2A3,SFN,HINT1,TRAF2,SIRT1,PYCARD	6/161
9_Member	GO Biological Processes	GO:0071345	cellular response to cytokine stimulus	-2.73578	-0.771042	1491,2597,3856,3875,4502,6885,7114,7186,23411,29108,54469,54836,57539,84817	CTH,GAPDH,KRT8,KRT18,MT2A,MAP3K7,TMSB4X,TRAF2,SIRT1,PYCARD,ZFAND6,BSPRY,WDR35,TXNDC17	14/730
9_Member	GO Biological Processes	GO:0061081	positive regulation of myeloid leukocyte cytokine production involved in immune response	-2.59806	-0.682351	4282,23411,29108	MIF,SIRT1,PYCARD	3/35
9_Member	GO Biological Processes	GO:0002718	regulation of cytokine production involved in immune response	-2.58521	-0.677565	4282,6885,7186,23411,29108	MIF,MAP3K7,TRAF2,SIRT1,PYCARD	5/121
9_Member	GO Biological Processes	GO:0002824	positive regulation of adaptive immune response based on somatic recombination of immune receptors built from immunoglobulin superfamily domains	-2.55443	-0.659191	100,6885,7186,51571,338322	ADA,MAP3K7,TRAF2,CYRIB,NLRP10	5/123
9_Member	GO Biological Processes	GO:0002702	positive regulation of production of molecular mediator of immune response	-2.38151	-0.536078	4282,6885,7186,23411,29108	MIF,MAP3K7,TRAF2,SIRT1,PYCARD	5/135
9_Member	GO Biological Processes	GO:0072331	signal transduction by p53 class mediator	-2.28567	-0.472404	3094,4282,23411,29108	HINT1,MIF,SIRT1,PYCARD	4/89
9_Member	GO Biological Processes	GO:0072332	intrinsic apoptotic signaling pathway by p53 class mediator	-2.04444	-0.312883	3094,23411,29108	HINT1,SIRT1,PYCARD	3/55
9_Member	GO Biological Processes	GO:0019221	cytokine-mediated signaling pathway	-2.04134	-0.310831	3856,3875,6885,7114,7186,23411,29108,84817	KRT8,KRT18,MAP3K7,TMSB4X,TRAF2,SIRT1,PYCARD,TXNDC17	8/373
10_Summary	GO Biological Processes	GO:0045936	negative regulation of phosphate metabolic process	-5.19713	-2.34207	2280,2810,5144,5478,5524,6992,7345,9770,11315,23411,25793,29108,84962,199731,197,1476,2597,3476,29085,653145,1622,2023,4282,7114,51564,51571,57447,6647,1491,3148,7186,8567,6885,9693,1111,4287,7336,8525,7332,7534,8882,51542,5127,55054,3658,11187,79068,129563,2170,2171,283871	FKBP1A,SFN,PDE4D,PPIA,PTPA,PPP1R11,UCHL1,RASSF2,PARK7,SIRT1,FBXO7,PYCARD,AJUBA,CADM4,AHSG,CSTB,GAPDH,IGBP1,PHPT1,ANXA8,DBI,ENO1,MIF,TMSB4X,HDAC7,CYRIB,NDRG2,SOD1,CTH,HMGB2,TRAF2,MADD,MAP3K7,RAPGEF2,CHEK1,ATXN3,UBE2V2,DGKZ,UBE2L3,YWHAZ,ZPR1,VPS54,CDK16,ATG16L1,IREB2,PKP3,FTO,DIS3L2,FABP3,FABP5,PGP	51/-
10_Member	GO Biological Processes	GO:0045936	negative regulation of phosphate metabolic process	-5.19713	-2.34207	2280,2810,5144,5478,5524,6992,7345,9770,11315,23411,25793,29108,84962,199731	FKBP1A,SFN,PDE4D,PPIA,PTPA,PPP1R11,UCHL1,RASSF2,PARK7,SIRT1,FBXO7,PYCARD,AJUBA,CADM4	14/422
10_Member	GO Biological Processes	GO:0010563	negative regulation of phosphorus metabolic process	-5.18548	-2.34207	2280,2810,5144,5478,5524,6992,7345,9770,11315,23411,25793,29108,84962,199731	FKBP1A,SFN,PDE4D,PPIA,PTPA,PPP1R11,UCHL1,RASSF2,PARK7,SIRT1,FBXO7,PYCARD,AJUBA,CADM4	14/423
10_Member	GO Biological Processes	GO:0043086	negative regulation of catalytic activity	-4.85823	-2.15313	197,1476,2280,2597,2810,3476,5478,5524,6992,7345,11315,23411,25793,29085,29108,84962,653145	AHSG,CSTB,FKBP1A,GAPDH,SFN,IGBP1,PPIA,PTPA,PPP1R11,UCHL1,PARK7,SIRT1,FBXO7,PHPT1,PYCARD,AJUBA,ANXA8	17/646
10_Member	GO Biological Processes	GO:0031400	negative regulation of protein modification process	-4.54503	-1.95756	1622,2280,2810,5144,5478,5524,6992,7345,9770,11315,23411,25793,29108,199731	DBI,FKBP1A,SFN,PDE4D,PPIA,PTPA,PPP1R11,UCHL1,RASSF2,PARK7,SIRT1,FBXO7,PYCARD,CADM4	14/483
10_Member	GO Biological Processes	GO:1902532	negative regulation of intracellular signal transduction	-4.38378	-1.85477	2023,3476,4282,5144,5478,7114,7345,9770,11315,23411,29108,51564,51571,57447,84962	ENO1,IGBP1,MIF,PDE4D,PPIA,TMSB4X,UCHL1,RASSF2,PARK7,SIRT1,PYCARD,HDAC7,CYRIB,NDRG2,AJUBA	15/566
10_Member	GO Biological Processes	GO:1902175	regulation of oxidative stress-induced intrinsic apoptotic signaling pathway	-4.14003	-1.70442	5478,6647,11315,23411	PPIA,SOD1,PARK7,SIRT1	4/29
10_Member	GO Biological Processes	GO:0042326	negative regulation of phosphorylation	-3.84338	-1.49482	2810,5144,5478,7345,9770,11315,23411,25793,29108,84962,199731	SFN,PDE4D,PPIA,UCHL1,RASSF2,PARK7,SIRT1,FBXO7,PYCARD,AJUBA,CADM4	11/364
10_Member	GO Biological Processes	GO:2001233	regulation of apoptotic signaling pathway	-3.64296	-1.34749	1491,2023,3148,4282,5478,6647,7186,8567,11315,23411,29108	CTH,ENO1,HMGB2,MIF,PPIA,SOD1,TRAF2,MADD,PARK7,SIRT1,PYCARD	11/384
10_Member	GO Biological Processes	GO:1903201	regulation of oxidative stress-induced cell death	-3.63302	-1.34136	5478,6647,11315,23411,25793	PPIA,SOD1,PARK7,SIRT1,FBXO7	5/71
10_Member	GO Biological Processes	GO:0051348	negative regulation of transferase activity	-3.5852	-1.31582	2810,5478,7345,11315,23411,25793,29085,29108,84962	SFN,PPIA,UCHL1,PARK7,SIRT1,FBXO7,PHPT1,PYCARD,AJUBA	9/267
10_Member	GO Biological Processes	GO:0001933	negative regulation of protein phosphorylation	-3.51073	-1.25908	2810,5144,5478,7345,9770,11315,23411,25793,29108,199731	SFN,PDE4D,PPIA,UCHL1,RASSF2,PARK7,SIRT1,FBXO7,PYCARD,CADM4	10/334
10_Member	GO Biological Processes	GO:0045859	regulation of protein kinase activity	-3.39311	-1.19762	2810,4282,5478,6647,6885,7186,7345,9693,9770,11315,23411,25793,29108,84962	SFN,MIF,PPIA,SOD1,MAP3K7,TRAF2,UCHL1,RAPGEF2,RASSF2,PARK7,SIRT1,FBXO7,PYCARD,AJUBA	14/623
10_Member	GO Biological Processes	GO:1902176	negative regulation of oxidative stress-induced intrinsic apoptotic signaling pathway	-3.3879	-1.19762	5478,11315,23411	PPIA,PARK7,SIRT1	3/19
10_Member	GO Biological Processes	GO:0080135	regulation of cellular response to stress	-3.38119	-1.19699	1111,2023,3476,4282,4287,5478,6647,7186,7336,9770,11315,23411,25793,29108,84962	CHEK1,ENO1,IGBP1,MIF,ATXN3,PPIA,SOD1,TRAF2,UBE2V2,RASSF2,PARK7,SIRT1,FBXO7,PYCARD,AJUBA	15/700
10_Member	GO Biological Processes	GO:2001242	regulation of intrinsic apoptotic signaling pathway	-3.35429	-1.176	2023,4282,5478,6647,11315,23411,29108	ENO1,MIF,PPIA,SOD1,PARK7,SIRT1,PYCARD	7/174
10_Member	GO Biological Processes	GO:0033673	negative regulation of kinase activity	-3.32229	-1.14692	2810,5478,7345,11315,23411,25793,29108,84962	SFN,PPIA,UCHL1,PARK7,SIRT1,FBXO7,PYCARD,AJUBA	8/231
10_Member	GO Biological Processes	GO:0043549	regulation of kinase activity	-3.27365	-1.11821	2810,4282,5478,6647,6885,7186,7345,8525,9693,9770,11315,23411,25793,29108,84962	SFN,MIF,PPIA,SOD1,MAP3K7,TRAF2,UCHL1,DGKZ,RAPGEF2,RASSF2,PARK7,SIRT1,FBXO7,PYCARD,AJUBA	15/717
10_Member	GO Biological Processes	GO:1900407	regulation of cellular response to oxidative stress	-3.24664	-1.1076	5478,6647,11315,23411,25793	PPIA,SOD1,PARK7,SIRT1,FBXO7	5/86
10_Member	GO Biological Processes	GO:0071900	regulation of protein serine/threonine kinase activity	-3.21955	-1.08848	2810,4282,6885,7186,7345,9693,23411,25793,29108,84962	SFN,MIF,MAP3K7,TRAF2,UCHL1,RAPGEF2,SIRT1,FBXO7,PYCARD,AJUBA	10/364
10_Member	GO Biological Processes	GO:1903202	negative regulation of oxidative stress-induced cell death	-3.17602	-1.05854	5478,11315,23411,25793	PPIA,PARK7,SIRT1,FBXO7	4/51
10_Member	GO Biological Processes	GO:1902882	regulation of response to oxidative stress	-3.07083	-0.991786	5478,6647,11315,23411,25793	PPIA,SOD1,PARK7,SIRT1,FBXO7	5/94
10_Member	GO Biological Processes	GO:0051347	positive regulation of transferase activity	-3.06071	-0.983991	1622,4282,5478,6885,7186,7332,8525,9693,9770,11315,23411,84962	DBI,MIF,PPIA,MAP3K7,TRAF2,UBE2L3,DGKZ,RAPGEF2,RASSF2,PARK7,SIRT1,AJUBA	12/523
10_Member	GO Biological Processes	GO:2001243	negative regulation of intrinsic apoptotic signaling pathway	-2.96948	-0.917591	2023,4282,5478,11315,23411	ENO1,MIF,PPIA,PARK7,SIRT1	5/99
10_Member	GO Biological Processes	GO:0043408	regulation of MAPK cascade	-2.93997	-0.899101	3476,4282,5478,6647,6885,7186,7345,7534,8567,9693,9770,29108,57447,84962	IGBP1,MIF,PPIA,SOD1,MAP3K7,TRAF2,UCHL1,YWHAZ,MADD,RAPGEF2,RASSF2,PYCARD,NDRG2,AJUBA	14/694
10_Member	GO Biological Processes	GO:1901215	negative regulation of neuron death	-2.93542	-0.899101	6647,7186,8882,11315,23411,25793,51542	SOD1,TRAF2,ZPR1,PARK7,SIRT1,FBXO7,VPS54	7/205
10_Member	GO Biological Processes	GO:0010508	positive regulation of autophagy	-2.93379	-0.899101	5127,6885,11315,23411,25793,55054	CDK16,MAP3K7,PARK7,SIRT1,FBXO7,ATG16L1	6/150
10_Member	GO Biological Processes	GO:0031329	regulation of cellular catabolic process	-2.92821	-0.897508	2597,3658,5127,6885,7186,7345,11187,11315,23411,25793,29108,55054,79068,129563	GAPDH,IREB2,CDK16,MAP3K7,TRAF2,UCHL1,PKP3,PARK7,SIRT1,FBXO7,PYCARD,ATG16L1,FTO,DIS3L2	14/696
10_Member	GO Biological Processes	GO:0006469	negative regulation of protein kinase activity	-2.88709	-0.867164	2810,5478,7345,11315,23411,25793,29108	SFN,PPIA,UCHL1,PARK7,SIRT1,FBXO7,PYCARD	7/209
10_Member	GO Biological Processes	GO:0010506	regulation of autophagy	-2.74417	-0.777629	2597,5127,6885,7345,11315,23411,25793,29108,55054	GAPDH,CDK16,MAP3K7,UCHL1,PARK7,SIRT1,FBXO7,PYCARD,ATG16L1	9/351
10_Member	GO Biological Processes	GO:0033674	positive regulation of kinase activity	-2.68635	-0.735736	4282,5478,6885,7186,8525,9693,9770,11315,23411,84962	MIF,PPIA,MAP3K7,TRAF2,DGKZ,RAPGEF2,RASSF2,PARK7,SIRT1,AJUBA	10/429
10_Member	GO Biological Processes	GO:0045860	positive regulation of protein kinase activity	-2.63779	-0.705875	4282,5478,6885,7186,9693,9770,11315,23411,84962	MIF,PPIA,MAP3K7,TRAF2,RAPGEF2,RASSF2,PARK7,SIRT1,AJUBA	9/364
10_Member	GO Biological Processes	GO:2001234	negative regulation of apoptotic signaling pathway	-2.61968	-0.692926	1491,2023,3148,4282,5478,11315,23411	CTH,ENO1,HMGB2,MIF,PPIA,PARK7,SIRT1	7/233
10_Member	GO Biological Processes	GO:0071902	positive regulation of protein serine/threonine kinase activity	-2.37535	-0.533302	4282,6885,7186,9693,23411,84962	MIF,MAP3K7,TRAF2,RAPGEF2,SIRT1,AJUBA	6/194
10_Member	GO Biological Processes	GO:2001235	positive regulation of apoptotic signaling pathway	-2.289	-0.472404	6647,7186,11315,23411,29108	SOD1,TRAF2,PARK7,SIRT1,PYCARD	5/142
10_Member	GO Biological Processes	GO:0062012	regulation of small molecule metabolic process	-2.27294	-0.463454	2023,2170,2171,6647,7114,11315,23411,283871	ENO1,FABP3,FABP5,SOD1,TMSB4X,PARK7,SIRT1,PGP	8/340
10_Member	GO Biological Processes	GO:0043410	positive regulation of MAPK cascade	-2.25545	-0.45467	4282,5478,6647,6885,7186,8567,9693,9770,29108,84962	MIF,PPIA,SOD1,MAP3K7,TRAF2,MADD,RAPGEF2,RASSF2,PYCARD,AJUBA	10/494
10_Member	GO Biological Processes	GO:0043524	negative regulation of neuron apoptotic process	-2.10835	-0.348624	6647,8882,11315,23411,51542	SOD1,ZPR1,PARK7,SIRT1,VPS54	5/157
10_Member	GO Biological Processes	GO:0031331	positive regulation of cellular catabolic process	-2.10156	-0.342953	5127,6885,11315,23411,25793,55054,79068,129563	CDK16,MAP3K7,PARK7,SIRT1,FBXO7,ATG16L1,FTO,DIS3L2	8/364
10_Member	GO Biological Processes	GO:1901214	regulation of neuron death	-2.02283	-0.297524	6647,7186,8882,11315,23411,25793,51542	SOD1,TRAF2,ZPR1,PARK7,SIRT1,FBXO7,VPS54	7/301
11_Summary	GO Biological Processes	GO:0032446	protein modification by small protein conjugation	-4.86286	-2.15313	6612,6992,7064,7186,7323,7326,7332,7336,11060,23411,25793,29089,51564,54836,64422,83637,92912,348180,9491,51320,999,2280,5478,6885,7534,4287,7345,129563	SUMO3,PPP1R11,THOP1,TRAF2,UBE2D3,UBE2G1,UBE2L3,UBE2V2,WWP2,SIRT1,FBXO7,UBE2T,HDAC7,BSPRY,ATG3,ZMIZ2,UBE2Q2,CTU2,PSMF1,MEX3C,CDH1,FKBP1A,PPIA,MAP3K7,YWHAZ,ATXN3,UCHL1,DIS3L2	28/-
11_Member	GO Biological Processes	GO:0032446	protein modification by small protein conjugation	-4.86286	-2.15313	6612,6992,7064,7186,7323,7326,7332,7336,11060,23411,25793,29089,51564,54836,64422,83637,92912,348180	SUMO3,PPP1R11,THOP1,TRAF2,UBE2D3,UBE2G1,UBE2L3,UBE2V2,WWP2,SIRT1,FBXO7,UBE2T,HDAC7,BSPRY,ATG3,ZMIZ2,UBE2Q2,CTU2	18/714
11_Member	GO Biological Processes	GO:0000209	protein polyubiquitination	-4.66429	-2.02331	7064,7186,7323,7326,7332,7336,11060,25793,29089,92912	THOP1,TRAF2,UBE2D3,UBE2G1,UBE2L3,UBE2V2,WWP2,FBXO7,UBE2T,UBE2Q2	10/242
11_Member	Reactome Gene Sets	R-HSA-8852135	Protein ubiquitination	-4.4468	-1.88357	7323,7326,7332,7336,29089,92912	UBE2D3,UBE2G1,UBE2L3,UBE2V2,UBE2T,UBE2Q2	6/79
11_Member	GO Biological Processes	GO:0070534	protein K63-linked ubiquitination	-4.24054	-1.74804	7186,7326,7336,11060,29089	TRAF2,UBE2G1,UBE2V2,WWP2,UBE2T	5/53
11_Member	Reactome Gene Sets	R-HSA-8866652	Synthesis of active ubiquitin: roles of E1 and E2 enzymes	-4.08053	-1.66647	7326,7332,29089,92912	UBE2G1,UBE2L3,UBE2T,UBE2Q2	4/30
11_Member	GO Biological Processes	GO:0070936	protein K48-linked ubiquitination	-3.54875	-1.28656	7323,7326,25793,29089,92912	UBE2D3,UBE2G1,FBXO7,UBE2T,UBE2Q2	5/74
11_Member	GO Biological Processes	GO:0016567	protein ubiquitination	-3.30464	-1.14077	6992,7064,7186,7323,7326,7332,7336,11060,23411,25793,29089,54836,64422,92912	PPP1R11,THOP1,TRAF2,UBE2D3,UBE2G1,UBE2L3,UBE2V2,WWP2,SIRT1,FBXO7,UBE2T,BSPRY,ATG3,UBE2Q2	14/636
11_Member	Reactome Gene Sets	R-HSA-983168	Antigen processing: Ubiquitination & Proteasome degradation	-3.12744	-1.0293	7064,7323,7326,7332,7336,9491,25793,51320,92912	THOP1,UBE2D3,UBE2G1,UBE2L3,UBE2V2,PSMF1,FBXO7,MEX3C,UBE2Q2	9/309
11_Member	GO Biological Processes	GO:0070979	protein K11-linked ubiquitination	-2.79305	-0.804329	7323,7332,29089	UBE2D3,UBE2L3,UBE2T	3/30
11_Member	Reactome Gene Sets	R-HSA-1280218	Adaptive Immune System	-2.53142	-0.64533	999,2280,5478,6885,7064,7323,7326,7332,7336,7534,9491,25793,51320,92912	CDH1,FKBP1A,PPIA,MAP3K7,THOP1,UBE2D3,UBE2G1,UBE2L3,UBE2V2,YWHAZ,PSMF1,FBXO7,MEX3C,UBE2Q2	14/769
11_Member	GO Biological Processes	GO:0051865	protein autoubiquitination	-2.53118	-0.64533	7186,7323,11060,29089	TRAF2,UBE2D3,WWP2,UBE2T	4/76
11_Member	Reactome Gene Sets	R-HSA-983169	Class I MHC mediated antigen processing & presentation	-2.50627	-0.625968	7064,7323,7326,7332,7336,9491,25793,51320,92912	THOP1,UBE2D3,UBE2G1,UBE2L3,UBE2V2,PSMF1,FBXO7,MEX3C,UBE2Q2	9/381
11_Member	KEGG Pathway	hsa04120	Ubiquitin mediated proteolysis	-2.289	-0.472404	7323,7326,7332,11060,92912	UBE2D3,UBE2G1,UBE2L3,WWP2,UBE2Q2	5/142
11_Member	GO Biological Processes	GO:0043161	proteasome-mediated ubiquitin-dependent protein catabolic process	-2.26546	-0.457233	4287,7323,7326,7345,9491,11060,23411,25793	ATXN3,UBE2D3,UBE2G1,UCHL1,PSMF1,WWP2,SIRT1,FBXO7	8/341
11_Member	GO Biological Processes	GO:0043632	modification-dependent macromolecule catabolic process	-2.12275	-0.358527	4287,6992,7323,7326,7332,7345,9491,11060,23411,25793,129563	ATXN3,PPP1R11,UBE2D3,UBE2G1,UBE2L3,UCHL1,PSMF1,WWP2,SIRT1,FBXO7,DIS3L2	11/599
11_Member	GO Biological Processes	GO:0010498	proteasomal protein catabolic process	-2.04793	-0.312883	4287,7323,7326,7345,9491,11060,23411,25793	ATXN3,UBE2D3,UBE2G1,UCHL1,PSMF1,WWP2,SIRT1,FBXO7	8/372
12_Summary	GO Biological Processes	GO:0032271	regulation of protein polymerization	-4.59194	-1.96766	7114,9168,11075,11135,29108,51571,51673,54961,93663,8936,10152,11315,348110,396,5144,4682,221150,7186,84962,1111,5810,56984,999,9693,56896,64422,57698,6647	TMSB4X,TMSB10,STMN2,CDC42EP1,PYCARD,CYRIB,TPPP3,SSH3,ARHGAP18,WASF1,ABI2,PARK7,ARPIN,ARHGDIA,PDE4D,NUBP1,SKA3,TRAF2,AJUBA,CHEK1,RAD1,PSMG2,CDH1,RAPGEF2,DPYSL5,ATG3,SHTN1,SOD1	28/-
12_Member	GO Biological Processes	GO:0032271	regulation of protein polymerization	-4.59194	-1.96766	7114,9168,11075,11135,29108,51571,51673,54961,93663	TMSB4X,TMSB10,STMN2,CDC42EP1,PYCARD,CYRIB,TPPP3,SSH3,ARHGAP18	9/197
12_Member	GO Biological Processes	GO:1902903	regulation of supramolecular fiber organization	-4.304	-1.79429	7114,8936,9168,10152,11075,11135,11315,29108,51571,54961,93663,348110	TMSB4X,WASF1,TMSB10,ABI2,STMN2,CDC42EP1,PARK7,PYCARD,CYRIB,SSH3,ARHGAP18,ARPIN	12/382
12_Member	GO Biological Processes	GO:0032970	regulation of actin filament-based process	-4.23927	-1.74804	396,5144,7114,8936,9168,10152,11135,29108,51571,54961,93663,348110	ARHGDIA,PDE4D,TMSB4X,WASF1,TMSB10,ABI2,CDC42EP1,PYCARD,CYRIB,SSH3,ARHGAP18,ARPIN	12/388
12_Member	GO Biological Processes	GO:0051493	regulation of cytoskeleton organization	-4.20882	-1.72947	396,4682,7114,8936,9168,10152,11075,11135,29108,51571,54961,93663,221150,348110	ARHGDIA,NUBP1,TMSB4X,WASF1,TMSB10,ABI2,STMN2,CDC42EP1,PYCARD,CYRIB,SSH3,ARHGAP18,SKA3,ARPIN	14/519
12_Member	GO Biological Processes	GO:0110053	regulation of actin filament organization	-4.2088	-1.72947	7114,8936,9168,10152,11135,29108,51571,54961,93663,348110	TMSB4X,WASF1,TMSB10,ABI2,CDC42EP1,PYCARD,CYRIB,SSH3,ARHGAP18,ARPIN	10/274
12_Member	GO Biological Processes	GO:0032956	regulation of actin cytoskeleton organization	-4.0253	-1.61801	396,7114,8936,9168,10152,11135,29108,51571,54961,93663,348110	ARHGDIA,TMSB4X,WASF1,TMSB10,ABI2,CDC42EP1,PYCARD,CYRIB,SSH3,ARHGAP18,ARPIN	11/347
12_Member	GO Biological Processes	GO:0030833	regulation of actin filament polymerization	-4.01059	-1.61143	7114,9168,11135,29108,51571,54961,93663	TMSB4X,TMSB10,CDC42EP1,PYCARD,CYRIB,SSH3,ARHGAP18	7/136
12_Member	GO Biological Processes	GO:0043254	regulation of protein-containing complex assembly	-3.96329	-1.58321	7114,7186,9168,11075,11135,11315,29108,51571,51673,54961,84962,93663	TMSB4X,TRAF2,TMSB10,STMN2,CDC42EP1,PARK7,PYCARD,CYRIB,TPPP3,SSH3,AJUBA,ARHGAP18	12/415
12_Member	GO Biological Processes	GO:0008064	regulation of actin polymerization or depolymerization	-3.65854	-1.35531	7114,9168,11135,29108,51571,54961,93663	TMSB4X,TMSB10,CDC42EP1,PYCARD,CYRIB,SSH3,ARHGAP18	7/155
12_Member	GO Biological Processes	GO:0030832	regulation of actin filament length	-3.60763	-1.32726	7114,9168,11135,29108,51571,54961,93663	TMSB4X,TMSB10,CDC42EP1,PYCARD,CYRIB,SSH3,ARHGAP18	7/158
12_Member	GO Biological Processes	GO:0051494	negative regulation of cytoskeleton organization	-3.59091	-1.3179	4682,7114,9168,11075,51571,54961,348110	NUBP1,TMSB4X,TMSB10,STMN2,CYRIB,SSH3,ARPIN	7/159
12_Member	GO Biological Processes	GO:0032272	negative regulation of protein polymerization	-3.4947	-1.25335	7114,9168,11075,51571,54961	TMSB4X,TMSB10,STMN2,CYRIB,SSH3	5/76
12_Member	GO Biological Processes	GO:0010639	negative regulation of organelle organization	-3.4398	-1.22797	1111,4682,5810,7114,9168,11075,51571,54961,56984,348110	CHEK1,NUBP1,RAD1,TMSB4X,TMSB10,STMN2,CYRIB,SSH3,PSMG2,ARPIN	10/341
12_Member	GO Biological Processes	GO:0051129	negative regulation of cellular component organization	-3.24889	-1.1076	999,1111,4682,5810,7114,9168,9693,11075,11315,51571,54961,56896,56984,64422,348110	CDH1,CHEK1,NUBP1,RAD1,TMSB4X,TMSB10,RAPGEF2,STMN2,PARK7,CYRIB,SSH3,DPYSL5,PSMG2,ATG3,ARPIN	15/721
12_Member	GO Biological Processes	GO:0031333	negative regulation of protein-containing complex assembly	-2.97901	-0.918249	7114,9168,11075,11315,51571,54961	TMSB4X,TMSB10,STMN2,PARK7,CYRIB,SSH3	6/147
12_Member	GO Biological Processes	GO:0030837	negative regulation of actin filament polymerization	-2.88253	-0.867164	7114,9168,51571,54961	TMSB4X,TMSB10,CYRIB,SSH3	4/61
12_Member	GO Biological Processes	GO:1902904	negative regulation of supramolecular fiber organization	-2.74976	-0.777629	7114,9168,11075,51571,54961,348110	TMSB4X,TMSB10,STMN2,CYRIB,SSH3,ARPIN	6/163
12_Member	GO Biological Processes	GO:0032535	regulation of cellular component size	-2.66997	-0.729649	999,7114,9168,11135,29108,51571,54961,57698,93663	CDH1,TMSB4X,TMSB10,CDC42EP1,PYCARD,CYRIB,SSH3,SHTN1,ARHGAP18	9/360
12_Member	GO Biological Processes	GO:0090066	regulation of anatomical structure size	-2.21984	-0.428793	999,6647,7114,9168,11135,29108,51571,54961,57698,93663	CDH1,SOD1,TMSB4X,TMSB10,CDC42EP1,PYCARD,CYRIB,SSH3,SHTN1,ARHGAP18	10/500
13_Summary	GO Biological Processes	GO:0009066	aspartate family amino acid metabolic process	-4.49611	-1.91841	159,2805,6611,80150,84245	ADSS2,GOT1,SMS,ASRGL1,MRI1	5/-
13_Member	GO Biological Processes	GO:0009066	aspartate family amino acid metabolic process	-4.49611	-1.91841	159,2805,6611,80150,84245	ADSS2,GOT1,SMS,ASRGL1,MRI1	5/47
13_Member	KEGG Pathway	hsa00250	Alanine, aspartate and glutamate metabolism	-2.5285	-0.64533	159,2805,80150	ADSS2,GOT1,ASRGL1	3/37
14_Summary	KEGG Pathway	hsa00520	Amino sugar and nucleotide sugar metabolism	-4.40708	-1.86738	5373,51167,55276,55577,140838	PMM2,CYB5R4,PGM2,NAGK,NANP	5/-
14_Member	KEGG Pathway	hsa00520	Amino sugar and nucleotide sugar metabolism	-4.40708	-1.86738	5373,51167,55276,55577,140838	PMM2,CYB5R4,PGM2,NAGK,NANP	5/49
14_Member	KEGG Pathway	hsa01250	Biosynthesis of nucleotide sugars	-3.71703	-1.39785	5373,55276,55577,140838	PMM2,PGM2,NAGK,NANP	4/37
15_Summary	Reactome Gene Sets	R-HSA-75893	TNF signaling	-4.08741	-1.66828	6885,7186,7323,7332,8567,1491,2280,2597,23411,29108,54469,84962,7336,8936,54874,55054,8653,55593,396,5144,51564,3875,5478,11315,4205	MAP3K7,TRAF2,UBE2D3,UBE2L3,MADD,CTH,FKBP1A,GAPDH,SIRT1,PYCARD,ZFAND6,AJUBA,UBE2V2,WASF1,FNBP1L,ATG16L1,DDX3Y,OTUD5,ARHGDIA,PDE4D,HDAC7,KRT18,PPIA,PARK7,MEF2A	25/-
15_Member	Reactome Gene Sets	R-HSA-75893	TNF signaling	-4.08741	-1.66828	6885,7186,7323,7332,8567	MAP3K7,TRAF2,UBE2D3,UBE2L3,MADD	5/57
15_Member	GO Biological Processes	GO:0043122	regulation of I-kappaB kinase/NF-kappaB signaling	-3.64576	-1.34749	1491,2280,2597,6885,7186,23411,29108,54469,84962	CTH,FKBP1A,GAPDH,MAP3K7,TRAF2,SIRT1,PYCARD,ZFAND6,AJUBA	9/262
15_Member	Reactome Gene Sets	R-HSA-5357905	Regulation of TNFR1 signaling	-3.27679	-1.11821	7186,7323,7332,8567	TRAF2,UBE2D3,UBE2L3,MADD	4/48
15_Member	KEGG Pathway	hsa05131	Shigellosis	-3.13193	-1.03135	6885,7186,7323,7336,8936,29108,54874,55054	MAP3K7,TRAF2,UBE2D3,UBE2V2,WASF1,PYCARD,FNBP1L,ATG16L1	8/247
15_Member	WikiPathways	WP3865	Novel intracellular components of RIG-I-like receptor pathway	-2.90936	-0.883023	6885,7186,8653,55593	MAP3K7,TRAF2,DDX3Y,OTUD5	4/60
15_Member	Reactome Gene Sets	R-HSA-73887	Death Receptor Signaling	-2.87517	-0.863514	396,6885,7186,7323,7332,8567	ARHGDIA,MAP3K7,TRAF2,UBE2D3,UBE2L3,MADD	6/154
15_Member	GO Biological Processes	GO:0032663	regulation of interleukin-2 production	-2.83033	-0.829435	5144,6885,7186,51564	PDE4D,MAP3K7,TRAF2,HDAC7	4/63
15_Member	GO Biological Processes	GO:0032743	positive regulation of interleukin-2 production	-2.6345	-0.704248	5144,6885,7186	PDE4D,MAP3K7,TRAF2	3/34
15_Member	GO Biological Processes	GO:0043123	positive regulation of I-kappaB kinase/NF-kappaB signaling	-2.38624	-0.538738	1491,2280,2597,6885,7186,84962	CTH,FKBP1A,GAPDH,MAP3K7,TRAF2,AJUBA	6/193
15_Member	Canonical Pathways	M128	PID TNF PATHWAY	-2.25989	-0.45664	6885,7186,8567	MAP3K7,TRAF2,MADD	3/46
15_Member	Canonical Pathways	M220	PID CASPASE PATHWAY	-2.1349	-0.367265	3875,7186,8567	KRT18,TRAF2,MADD	3/51
15_Member	GO Biological Processes	GO:0032147	activation of protein kinase activity	-2.09361	-0.339444	5478,6885,7186,11315	PPIA,MAP3K7,TRAF2,PARK7	4/101
15_Member	GO Biological Processes	GO:0051092	positive regulation of NF-kappaB transcription factor activity	-2.08588	-0.338299	1491,5478,6885,7186,29108	CTH,PPIA,MAP3K7,TRAF2,PYCARD	5/159
15_Member	Reactome Gene Sets	R-HSA-168164	Toll Like Receptor 3 (TLR3) Cascade	-2.03552	-0.307098	4205,6885,7186,7323	MEF2A,MAP3K7,TRAF2,UBE2D3	4/105
16_Summary	Canonical Pathways	M275	PID ALPHA SYNUCLEIN PATHWAY	-3.96783	-1.58321	2280,7332,7345,11315,7326,1476,3251,6647,60314	FKBP1A,UBE2L3,UCHL1,PARK7,UBE2G1,CSTB,HPRT1,SOD1,MYG1	9/-
16_Member	Canonical Pathways	M275	PID ALPHA SYNUCLEIN PATHWAY	-3.96783	-1.58321	2280,7332,7345,11315	FKBP1A,UBE2L3,UCHL1,PARK7	4/32
16_Member	WikiPathways	WP2371	Parkinson's disease pathway	-2.63881	-0.705875	7326,7332,7345,11315	UBE2G1,UBE2L3,UCHL1,PARK7	4/71
16_Member	GO Biological Processes	GO:0007626	locomotory behavior	-2.36454	-0.525188	1476,3251,6647,7345,11315,60314	CSTB,HPRT1,SOD1,UCHL1,PARK7,MYG1	6/195
17_Summary	Reactome Gene Sets	R-HSA-75035	Chk1/Chk2(Cds1) mediated inactivation of Cyclin B:Cdk1 complex	-3.90289	-1.5411	1111,2810,7534,5901,23411,2280,999,3148,7186,7332,9491,4287,489,5144,8525,3875	CHEK1,SFN,YWHAZ,RAN,SIRT1,FKBP1A,CDH1,HMGB2,TRAF2,UBE2L3,PSMF1,ATXN3,ATP2A3,PDE4D,DGKZ,KRT18	16/-
17_Member	Reactome Gene Sets	R-HSA-75035	Chk1/Chk2(Cds1) mediated inactivation of Cyclin B:Cdk1 complex	-3.90289	-1.5411	1111,2810,7534	CHEK1,SFN,YWHAZ	3/13
17_Member	Canonical Pathways	M136	PID FOXO PATHWAY	-3.24244	-1.10607	2810,5901,7534,23411	SFN,RAN,YWHAZ,SIRT1	4/49
17_Member	Canonical Pathways	M113	PID NFAT 3PATHWAY	-3.11244	-1.01674	2280,2810,5901,7534	FKBP1A,SFN,RAN,YWHAZ	4/53
17_Member	Reactome Gene Sets	R-HSA-5357801	Programmed Cell Death	-2.83991	-0.833771	999,2810,3148,7186,7332,7534,9491	CDH1,SFN,HMGB2,TRAF2,UBE2L3,YWHAZ,PSMF1	7/213
17_Member	Reactome Gene Sets	R-HSA-9614085	FOXO-mediated transcription	-2.77997	-0.793137	2810,4287,7534,23411	SFN,ATXN3,YWHAZ,SIRT1	4/65
17_Member	Reactome Gene Sets	R-HSA-109581	Apoptosis	-2.53449	-0.64533	999,2810,3148,7186,7534,9491	CDH1,SFN,HMGB2,TRAF2,YWHAZ,PSMF1	6/180
17_Member	Canonical Pathways	M239	PID A6B1 A6B4 INTEGRIN PATHWAY	-2.25989	-0.45664	999,2810,7534	CDH1,SFN,YWHAZ	3/46
17_Member	WikiPathways	WP289	Myometrial relaxation and contraction pathways	-2.11972	-0.357748	489,2810,5144,7534,8525	ATP2A3,SFN,PDE4D,YWHAZ,DGKZ	5/156
17_Member	WikiPathways	WP2272	Pathogenic Escherichia coli infection	-2.04444	-0.312883	999,3875,7534	CDH1,KRT18,YWHAZ	3/55
18_Summary	GO Biological Processes	GO:0051651	maintenance of location in cell	-3.84952	-1.4966	213,7114,9168,11315,23411,23568,29108,338322	ALB,TMSB4X,TMSB10,PARK7,SIRT1,ARL2BP,PYCARD,NLRP10	8/-
18_Member	GO Biological Processes	GO:0051651	maintenance of location in cell	-3.84952	-1.4966	213,7114,9168,11315,23411,23568	ALB,TMSB4X,TMSB10,PARK7,SIRT1,ARL2BP	6/101
18_Member	GO Biological Processes	GO:0032507	maintenance of protein location in cell	-2.75544	-0.777629	7114,9168,11315,23568	TMSB4X,TMSB10,PARK7,ARL2BP	4/66
18_Member	GO Biological Processes	GO:0051235	maintenance of location	-2.61997	-0.692926	213,7114,9168,11315,23411,23568	ALB,TMSB4X,TMSB10,PARK7,SIRT1,ARL2BP	6/173
18_Member	GO Biological Processes	GO:0045185	maintenance of protein location	-2.18607	-0.404534	7114,9168,11315,23568	TMSB4X,TMSB10,PARK7,ARL2BP	4/95
18_Member	GO Biological Processes	GO:0032677	regulation of interleukin-8 production	-2.06423	-0.325265	7114,11315,29108,338322	TMSB4X,PARK7,PYCARD,NLRP10	4/103
19_Summary	KEGG Pathway	hsa00350	Tyrosine metabolism	-3.76407	-1.43255	131,218,2805,4282	ADH7,ALDH3A1,GOT1,MIF	4/-
19_Member	KEGG Pathway	hsa00350	Tyrosine metabolism	-3.76407	-1.43255	131,218,2805,4282	ADH7,ALDH3A1,GOT1,MIF	4/36
19_Member	KEGG Pathway	hsa00360	Phenylalanine metabolism	-3.61855	-1.33445	218,2805,4282	ALDH3A1,GOT1,MIF	3/16
20_Summary	GO Biological Processes	GO:0018193	peptidyl-amino acid modification	-3.70744	-1.39231	1111,1491,2280,2597,3094,3145,5478,6612,6885,10152,11315,23411,51564,55561,79609,83637	CHEK1,CTH,FKBP1A,GAPDH,HINT1,HMBS,PPIA,SUMO3,MAP3K7,ABI2,PARK7,SIRT1,HDAC7,CDC42BPG,VCPKMT,ZMIZ2	16/-
20_Member	GO Biological Processes	GO:0018193	peptidyl-amino acid modification	-3.70744	-1.39231	1111,1491,2280,2597,3094,3145,5478,6612,6885,10152,11315,23411,51564,55561,79609,83637	CHEK1,CTH,FKBP1A,GAPDH,HINT1,HMBS,PPIA,SUMO3,MAP3K7,ABI2,PARK7,SIRT1,HDAC7,CDC42BPG,VCPKMT,ZMIZ2	16/726
20_Member	GO Biological Processes	GO:0018205	peptidyl-lysine modification	-3.69526	-1.38413	1491,3094,6612,6885,11315,23411,51564,79609,83637	CTH,HINT1,SUMO3,MAP3K7,PARK7,SIRT1,HDAC7,VCPKMT,ZMIZ2	9/258
20_Member	GO Biological Processes	GO:0016925	protein sumoylation	-2.08871	-0.33912	6612,51564,83637	SUMO3,HDAC7,ZMIZ2	3/53
20_Member	Canonical Pathways	M151	PID AR TF PATHWAY	-2.08871	-0.33912	23411,51564,83637	SIRT1,HDAC7,ZMIZ2	3/53

## Sheet: D4 total
GroupID	Category	Term	Description	LogP	Log(q-value)	Genes	Symbols	InTerm_InList
1_Summary	GO Biological Processes	GO:0097435	supramolecular fiber organization	-17.4712	-13.1226	25,226,408,1072,1073,1465,1832,2280,2620,2670,3854,3855,3856,3860,3861,3868,3872,3880,4134,4542,4629,5074,5357,5358,6622,7428,8936,9564,10152,10486,10487,10552,10677,11075,11117,11344,23242,25802,30008,30011,51673,57698,80774,83481,144501,146909,1398,3993,4287,5058,5217,5341,5901,8572,26499,29085,51421,54961,64236,90627,54874	ABL1,ALDOA,ARRB1,CFL1,CFL2,CSRP1,DSP,FKBP1A,GAS2,GFAP,KRT6B,KRT7,KRT8,KRT13,KRT14,KRT16,KRT17,KRT19,MAP4,MYO1F,MYH11,PAWR,PLS1,PLS3,SNCA,VHL,WASF1,BCAR1,ABI2,CAP2,CAP1,ARPC1A,AVIL,STMN2,EMILIN1,TWF2,COBL,LMOD1,EFEMP2,SH3KBP1,TPPP3,SHTN1,LIMD2,EPPK1,KRT80,KIF18B,CRK,LLGL2,ATXN3,PAK1,PFN2,PLEK,RAN,PDLIM4,PLEK2,PHPT1,AMOTL2,SSH3,PDLIM2,STARD13,FNBP1L	61/-
1_Member	GO Biological Processes	GO:0097435	supramolecular fiber organization	-17.4712	-13.1226	25,226,408,1072,1073,1465,1832,2280,2620,2670,3854,3855,3856,3860,3861,3868,3872,3880,4134,4542,4629,5074,5357,5358,6622,7428,8936,9564,10152,10486,10487,10552,10677,11075,11117,11344,23242,25802,30008,30011,51673,57698,80774,83481,144501,146909	ABL1,ALDOA,ARRB1,CFL1,CFL2,CSRP1,DSP,FKBP1A,GAS2,GFAP,KRT6B,KRT7,KRT8,KRT13,KRT14,KRT16,KRT17,KRT19,MAP4,MYO1F,MYH11,PAWR,PLS1,PLS3,SNCA,VHL,WASF1,BCAR1,ABI2,CAP2,CAP1,ARPC1A,AVIL,STMN2,EMILIN1,TWF2,COBL,LMOD1,EFEMP2,SH3KBP1,TPPP3,SHTN1,LIMD2,EPPK1,KRT80,KIF18B	46/569
1_Member	GO Biological Processes	GO:0030036	actin cytoskeleton organization	-14.7822	-11.0357	25,226,408,1072,1073,1398,1465,2620,3856,3880,3993,4287,4542,4629,5058,5074,5217,5341,5357,5358,5901,8572,8936,9564,10152,10486,10487,10552,10677,11344,23242,25802,26499,29085,30011,51421,54961,57698,64236,80774,90627	ABL1,ALDOA,ARRB1,CFL1,CFL2,CRK,CSRP1,GAS2,KRT8,KRT19,LLGL2,ATXN3,MYO1F,MYH11,PAK1,PAWR,PFN2,PLEK,PLS1,PLS3,RAN,PDLIM4,WASF1,BCAR1,ABI2,CAP2,CAP1,ARPC1A,AVIL,TWF2,COBL,LMOD1,PLEK2,PHPT1,SH3KBP1,AMOTL2,SSH3,SHTN1,PDLIM2,LIMD2,STARD13	41/536
1_Member	GO Biological Processes	GO:0030029	actin filament-based process	-13.8757	-10.2261	25,226,408,1072,1073,1398,1465,2620,3856,3880,3993,4287,4542,4629,5058,5074,5217,5341,5357,5358,5901,8572,8936,9564,10152,10486,10487,10552,10677,11344,23242,25802,26499,29085,30011,51421,54874,54961,57698,64236,80774,90627	ABL1,ALDOA,ARRB1,CFL1,CFL2,CRK,CSRP1,GAS2,KRT8,KRT19,LLGL2,ATXN3,MYO1F,MYH11,PAK1,PAWR,PFN2,PLEK,PLS1,PLS3,RAN,PDLIM4,WASF1,BCAR1,ABI2,CAP2,CAP1,ARPC1A,AVIL,TWF2,COBL,LMOD1,PLEK2,PHPT1,SH3KBP1,AMOTL2,FNBP1L,SSH3,SHTN1,PDLIM2,LIMD2,STARD13	42/597
1_Member	GO Biological Processes	GO:0007015	actin filament organization	-9.73563	-6.67065	25,226,408,1072,1073,2620,4542,5074,5357,5358,8936,9564,10152,10486,10487,10552,10677,11344,23242,25802,30011,57698,80774	ABL1,ALDOA,ARRB1,CFL1,CFL2,GAS2,MYO1F,PAWR,PLS1,PLS3,WASF1,BCAR1,ABI2,CAP2,CAP1,ARPC1A,AVIL,TWF2,COBL,LMOD1,SH3KBP1,SHTN1,LIMD2	23/261
2_Summary	GO Biological Processes	GO:0055086	nucleobase-containing small molecule metabolic process	-17.1467	-13.0992	100,112,159,226,1728,2745,3251,3417,4190,4199,4351,4708,4830,4831,4833,4860,5091,5144,5226,5238,5373,5901,6820,6888,7040,7360,7378,8034,9414,9556,10135,10380,10965,11165,11315,22934,23181,29925,51005,51727,55276,79717,84836,93100,132789,1152,2171,2224,3422,3613,3628,7167,8525,54344,54872,8706,10402,140838,144245,7295,7296,10560	ADA,ADCY6,ADSS2,ALDOA,NQO1,GLRX,HPRT1,IDH1,MDH1,ME1,MPI,NDUFB2,NME1,NME2,NME4,PNP,PC,PDE4D,PGD,PGM3,PMM2,RAN,SULT2B1,TALDO1,TGFB1,UGP2,UPP1,SLC25A16,TJP2,ATP5MJ,NAMPT,BPNT1,ACOT2,NUDT3,PARK7,RPIA,DIP2A,GMPPB,AMDHD2,CMPK1,PGM2,PPCS,ABHD14B,NAPRT,GNPDA2,CKB,FABP5,FDPS,IDI1,IMPA2,INPP1,TPI1,DGKZ,DPM3,PIGG,B3GALNT1,ST3GAL6,NANP,ALG10B,TXN,TXNRD1,SLC19A2	62/-
2_Member	GO Biological Processes	GO:0055086	nucleobase-containing small molecule metabolic process	-17.1467	-13.0992	100,112,159,226,1728,2745,3251,3417,4190,4199,4351,4708,4830,4831,4833,4860,5091,5144,5226,5238,5373,5901,6820,6888,7040,7360,7378,8034,9414,9556,10135,10380,10965,11165,11315,22934,23181,29925,51005,51727,55276,79717,84836,93100,132789	ADA,ADCY6,ADSS2,ALDOA,NQO1,GLRX,HPRT1,IDH1,MDH1,ME1,MPI,NDUFB2,NME1,NME2,NME4,PNP,PC,PDE4D,PGD,PGM3,PMM2,RAN,SULT2B1,TALDO1,TGFB1,UGP2,UPP1,SLC25A16,TJP2,ATP5MJ,NAMPT,BPNT1,ACOT2,NUDT3,PARK7,RPIA,DIP2A,GMPPB,AMDHD2,CMPK1,PGM2,PPCS,ABHD14B,NAPRT,GNPDA2	45/555
2_Member	GO Biological Processes	GO:0009117	nucleotide metabolic process	-12.8333	-9.3298	100,112,159,226,1728,3251,3417,4190,4199,4708,4830,4831,4833,4860,5091,5144,5226,5901,6820,6888,7040,7378,8034,9414,9556,10135,10380,10965,11165,11315,22934,23181,51727,79717,84836,93100	ADA,ADCY6,ADSS2,ALDOA,NQO1,HPRT1,IDH1,MDH1,ME1,NDUFB2,NME1,NME2,NME4,PNP,PC,PDE4D,PGD,RAN,SULT2B1,TALDO1,TGFB1,UPP1,SLC25A16,TJP2,ATP5MJ,NAMPT,BPNT1,ACOT2,NUDT3,PARK7,RPIA,DIP2A,CMPK1,PPCS,ABHD14B,NAPRT	36/478
2_Member	GO Biological Processes	GO:0006753	nucleoside phosphate metabolic process	-12.5922	-9.19784	100,112,159,226,1728,3251,3417,4190,4199,4708,4830,4831,4833,4860,5091,5144,5226,5901,6820,6888,7040,7378,8034,9414,9556,10135,10380,10965,11165,11315,22934,23181,51727,79717,84836,93100	ADA,ADCY6,ADSS2,ALDOA,NQO1,HPRT1,IDH1,MDH1,ME1,NDUFB2,NME1,NME2,NME4,PNP,PC,PDE4D,PGD,RAN,SULT2B1,TALDO1,TGFB1,UPP1,SLC25A16,TJP2,ATP5MJ,NAMPT,BPNT1,ACOT2,NUDT3,PARK7,RPIA,DIP2A,CMPK1,PPCS,ABHD14B,NAPRT	36/487
2_Member	GO Biological Processes	GO:0006163	purine nucleotide metabolic process	-12.3129	-8.96436	100,112,159,226,1728,3251,3417,4190,4199,4708,4830,4831,4833,4860,5091,5144,5226,5901,6820,6888,7040,8034,9414,9556,10135,10380,10965,11165,22934,23181,79717,84836,93100	ADA,ADCY6,ADSS2,ALDOA,NQO1,HPRT1,IDH1,MDH1,ME1,NDUFB2,NME1,NME2,NME4,PNP,PC,PDE4D,PGD,RAN,SULT2B1,TALDO1,TGFB1,SLC25A16,TJP2,ATP5MJ,NAMPT,BPNT1,ACOT2,NUDT3,RPIA,DIP2A,PPCS,ABHD14B,NAPRT	33/420
2_Member	GO Biological Processes	GO:0072521	purine-containing compound metabolic process	-12.1879	-8.88068	100,112,159,226,1728,3251,3417,4190,4199,4708,4830,4831,4833,4860,5091,5144,5226,5901,6820,6888,7040,8034,9414,9556,10135,10380,10965,11165,22934,23181,55276,79717,84836,93100	ADA,ADCY6,ADSS2,ALDOA,NQO1,HPRT1,IDH1,MDH1,ME1,NDUFB2,NME1,NME2,NME4,PNP,PC,PDE4D,PGD,RAN,SULT2B1,TALDO1,TGFB1,SLC25A16,TJP2,ATP5MJ,NAMPT,BPNT1,ACOT2,NUDT3,RPIA,DIP2A,PGM2,PPCS,ABHD14B,NAPRT	34/450
2_Member	GO Biological Processes	GO:0019693	ribose phosphate metabolic process	-8.80777	-6.05028	100,112,159,226,3251,4708,4830,4831,4833,4860,5144,5901,6820,7040,7378,8034,9414,9556,10380,10965,11165,22934,23181,51727,79717,84836	ADA,ADCY6,ADSS2,ALDOA,HPRT1,NDUFB2,NME1,NME2,NME4,PNP,PDE4D,RAN,SULT2B1,TGFB1,UPP1,SLC25A16,TJP2,ATP5MJ,BPNT1,ACOT2,NUDT3,RPIA,DIP2A,CMPK1,PPCS,ABHD14B	26/369
2_Member	GO Biological Processes	GO:0009259	ribonucleotide metabolic process	-8.36462	-5.64953	100,112,159,226,3251,4708,4830,4831,4833,4860,5144,5901,6820,7040,7378,8034,9414,9556,10380,10965,11165,23181,51727,79717,84836	ADA,ADCY6,ADSS2,ALDOA,HPRT1,NDUFB2,NME1,NME2,NME4,PNP,PDE4D,RAN,SULT2B1,TGFB1,UPP1,SLC25A16,TJP2,ATP5MJ,BPNT1,ACOT2,NUDT3,DIP2A,CMPK1,PPCS,ABHD14B	25/360
2_Member	GO Biological Processes	GO:0090407	organophosphate biosynthetic process	-8.211	-5.52519	100,112,159,226,1152,2171,2224,3251,3422,3613,3628,4199,4708,4830,4831,4833,4860,7040,7167,7378,8034,8525,9556,10135,10380,23181,51727,54344,54872,79717,93100	ADA,ADCY6,ADSS2,ALDOA,CKB,FABP5,FDPS,HPRT1,IDI1,IMPA2,INPP1,ME1,NDUFB2,NME1,NME2,NME4,PNP,TGFB1,TPI1,UPP1,SLC25A16,DGKZ,ATP5MJ,NAMPT,BPNT1,DIP2A,CMPK1,DPM3,PIGG,PPCS,NAPRT	31/541
2_Member	GO Biological Processes	GO:0009150	purine ribonucleotide metabolic process	-7.51033	-4.98504	100,112,159,226,3251,4708,4830,4831,4833,4860,5144,5901,6820,7040,8034,9414,9556,10380,10965,11165,23181,79717,84836	ADA,ADCY6,ADSS2,ALDOA,HPRT1,NDUFB2,NME1,NME2,NME4,PNP,PDE4D,RAN,SULT2B1,TGFB1,SLC25A16,TJP2,ATP5MJ,BPNT1,ACOT2,NUDT3,DIP2A,PPCS,ABHD14B	23/341
2_Member	GO Biological Processes	GO:0009165	nucleotide biosynthetic process	-7.46089	-4.95118	100,112,159,226,3251,4199,4708,4830,4831,4833,4860,7040,7378,8034,9556,10135,23181,51727,79717,93100	ADA,ADCY6,ADSS2,ALDOA,HPRT1,ME1,NDUFB2,NME1,NME2,NME4,PNP,TGFB1,UPP1,SLC25A16,ATP5MJ,NAMPT,DIP2A,CMPK1,PPCS,NAPRT	20/263
2_Member	GO Biological Processes	GO:1901293	nucleoside phosphate biosynthetic process	-7.40629	-4.90806	100,112,159,226,3251,4199,4708,4830,4831,4833,4860,7040,7378,8034,9556,10135,23181,51727,79717,93100	ADA,ADCY6,ADSS2,ALDOA,HPRT1,ME1,NDUFB2,NME1,NME2,NME4,PNP,TGFB1,UPP1,SLC25A16,ATP5MJ,NAMPT,DIP2A,CMPK1,PPCS,NAPRT	20/265
2_Member	GO Biological Processes	GO:1901137	carbohydrate derivative biosynthetic process	-7.28262	-4.82055	100,112,159,226,3251,4351,4708,4830,4831,4833,4860,5238,5373,7040,7167,7378,8034,8706,9556,10402,23181,29925,51005,51727,54344,54872,55276,79717,132789,140838,144245	ADA,ADCY6,ADSS2,ALDOA,HPRT1,MPI,NDUFB2,NME1,NME2,NME4,PNP,PGM3,PMM2,TGFB1,TPI1,UPP1,SLC25A16,B3GALNT1,ATP5MJ,ST3GAL6,DIP2A,GMPPB,AMDHD2,CMPK1,DPM3,PIGG,PGM2,PPCS,GNPDA2,NANP,ALG10B	31/594
2_Member	GO Biological Processes	GO:0072522	purine-containing compound biosynthetic process	-6.74147	-4.39723	100,112,159,226,3251,4708,4830,4831,4833,4860,7040,8034,9556,10135,23181,55276,79717,93100	ADA,ADCY6,ADSS2,ALDOA,HPRT1,NDUFB2,NME1,NME2,NME4,PNP,TGFB1,SLC25A16,ATP5MJ,NAMPT,DIP2A,PGM2,PPCS,NAPRT	18/238
2_Member	Reactome Gene Sets	R-HSA-499943	Interconversion of nucleotide di- and triphosphates	-6.22127	-3.98665	2745,4830,4831,4833,7295,7296,51727	GLRX,NME1,NME2,NME4,TXN,TXNRD1,CMPK1	7/30
2_Member	GO Biological Processes	GO:0009260	ribonucleotide biosynthetic process	-6.15923	-3.92794	100,112,159,226,3251,4708,4830,4831,4833,7040,7378,8034,9556,23181,51727,79717	ADA,ADCY6,ADSS2,ALDOA,HPRT1,NDUFB2,NME1,NME2,NME4,TGFB1,UPP1,SLC25A16,ATP5MJ,DIP2A,CMPK1,PPCS	16/208
2_Member	GO Biological Processes	GO:0046390	ribose phosphate biosynthetic process	-5.96821	-3.76267	100,112,159,226,3251,4708,4830,4831,4833,7040,7378,8034,9556,23181,51727,79717	ADA,ADCY6,ADSS2,ALDOA,HPRT1,NDUFB2,NME1,NME2,NME4,TGFB1,UPP1,SLC25A16,ATP5MJ,DIP2A,CMPK1,PPCS	16/215
2_Member	GO Biological Processes	GO:0006164	purine nucleotide biosynthetic process	-5.6094	-3.48873	100,112,159,226,3251,4708,4830,4831,4833,7040,8034,9556,10135,23181,79717,93100	ADA,ADCY6,ADSS2,ALDOA,HPRT1,NDUFB2,NME1,NME2,NME4,TGFB1,SLC25A16,ATP5MJ,NAMPT,DIP2A,PPCS,NAPRT	16/229
2_Member	GO Biological Processes	GO:0009152	purine ribonucleotide biosynthetic process	-5.14443	-3.12426	100,112,159,226,3251,4708,4830,4831,4833,7040,8034,9556,23181,79717	ADA,ADCY6,ADSS2,ALDOA,HPRT1,NDUFB2,NME1,NME2,NME4,TGFB1,SLC25A16,ATP5MJ,DIP2A,PPCS	14/194
2_Member	GO Biological Processes	GO:0009220	pyrimidine ribonucleotide biosynthetic process	-4.42377	-2.56306	4830,4831,4833,7378,51727	NME1,NME2,NME4,UPP1,CMPK1	5/23
2_Member	GO Biological Processes	GO:0009218	pyrimidine ribonucleotide metabolic process	-3.76957	-2.0499	4830,4831,4833,7378,51727	NME1,NME2,NME4,UPP1,CMPK1	5/31
2_Member	GO Biological Processes	GO:0006221	pyrimidine nucleotide biosynthetic process	-3.70191	-2.00073	4830,4831,4833,7378,51727	NME1,NME2,NME4,UPP1,CMPK1	5/32
2_Member	GO Biological Processes	GO:0072528	pyrimidine-containing compound biosynthetic process	-3.34192	-1.72656	4830,4831,4833,7378,51727	NME1,NME2,NME4,UPP1,CMPK1	5/38
2_Member	GO Biological Processes	GO:0006228	UTP biosynthetic process	-3.2612	-1.67231	4830,4831,4833	NME1,NME2,NME4	3/10
2_Member	GO Biological Processes	GO:0006183	GTP biosynthetic process	-3.12845	-1.56884	4830,4831,4833	NME1,NME2,NME4	3/11
2_Member	GO Biological Processes	GO:0046039	GTP metabolic process	-3.09227	-1.54236	4830,4831,4833,5901	NME1,NME2,NME4,RAN	4/25
2_Member	GO Biological Processes	GO:0046051	UTP metabolic process	-3.00906	-1.47674	4830,4831,4833	NME1,NME2,NME4	3/12
2_Member	GO Biological Processes	GO:0009144	purine nucleoside triphosphate metabolic process	-2.97413	-1.44446	100,226,4708,4830,4831,4833,5901,7040,9556	ADA,ALDOA,NDUFB2,NME1,NME2,NME4,RAN,TGFB1,ATP5MJ	9/148
2_Member	GO Biological Processes	GO:0009206	purine ribonucleoside triphosphate biosynthetic process	-2.84909	-1.35423	226,4708,4830,4831,4833,7040,9556	ALDOA,NDUFB2,NME1,NME2,NME4,TGFB1,ATP5MJ	7/97
2_Member	GO Biological Processes	GO:0009145	purine nucleoside triphosphate biosynthetic process	-2.82323	-1.33442	226,4708,4830,4831,4833,7040,9556	ALDOA,NDUFB2,NME1,NME2,NME4,TGFB1,ATP5MJ	7/98
2_Member	GO Biological Processes	GO:0006241	CTP biosynthetic process	-2.80145	-1.32036	4830,4831,4833	NME1,NME2,NME4	3/14
2_Member	GO Biological Processes	GO:0009209	pyrimidine ribonucleoside triphosphate biosynthetic process	-2.71007	-1.26079	4830,4831,4833	NME1,NME2,NME4	3/15
2_Member	GO Biological Processes	GO:0009201	ribonucleoside triphosphate biosynthetic process	-2.69885	-1.25066	226,4708,4830,4831,4833,7040,9556	ALDOA,NDUFB2,NME1,NME2,NME4,TGFB1,ATP5MJ	7/103
2_Member	GO Biological Processes	GO:0006220	pyrimidine nucleotide metabolic process	-2.67597	-1.23537	4830,4831,4833,7378,51727	NME1,NME2,NME4,UPP1,CMPK1	5/53
2_Member	GO Biological Processes	GO:0046036	CTP metabolic process	-2.62542	-1.19699	4830,4831,4833	NME1,NME2,NME4	3/16
2_Member	GO Biological Processes	GO:0009141	nucleoside triphosphate metabolic process	-2.6126	-1.18676	100,226,4708,4830,4831,4833,5901,7040,9556	ADA,ALDOA,NDUFB2,NME1,NME2,NME4,RAN,TGFB1,ATP5MJ	9/167
2_Member	GO Biological Processes	GO:0072527	pyrimidine-containing compound metabolic process	-2.51667	-1.1175	4830,4831,4833,7378,10560,51727	NME1,NME2,NME4,UPP1,SLC19A2,CMPK1	6/83
2_Member	KEGG Pathway	hsa00240	Pyrimidine metabolism	-2.50302	-1.1058	4830,4831,4833,7378,51727	NME1,NME2,NME4,UPP1,CMPK1	5/58
2_Member	GO Biological Processes	GO:0009205	purine ribonucleoside triphosphate metabolic process	-2.47774	-1.08631	226,4708,4830,4831,4833,5901,7040,9556	ALDOA,NDUFB2,NME1,NME2,NME4,RAN,TGFB1,ATP5MJ	8/143
2_Member	GO Biological Processes	GO:0009208	pyrimidine ribonucleoside triphosphate metabolic process	-2.47296	-1.08629	4830,4831,4833	NME1,NME2,NME4	3/18
2_Member	GO Biological Processes	GO:0009142	nucleoside triphosphate biosynthetic process	-2.45088	-1.06752	226,4708,4830,4831,4833,7040,9556	ALDOA,NDUFB2,NME1,NME2,NME4,TGFB1,ATP5MJ	7/114
2_Member	GO Biological Processes	GO:0009148	pyrimidine nucleoside triphosphate biosynthetic process	-2.40383	-1.03738	4830,4831,4833	NME1,NME2,NME4	3/19
2_Member	GO Biological Processes	GO:0009199	ribonucleoside triphosphate metabolic process	-2.35224	-0.996239	226,4708,4830,4831,4833,5901,7040,9556	ALDOA,NDUFB2,NME1,NME2,NME4,RAN,TGFB1,ATP5MJ	8/150
2_Member	Reactome Gene Sets	R-HSA-9748787	Azathioprine ADME	-2.11143	-0.822809	3251,4830,4831	HPRT1,NME1,NME2	3/24
2_Member	GO Biological Processes	GO:0009147	pyrimidine nucleoside triphosphate metabolic process	-2.06139	-0.787647	4830,4831,4833	NME1,NME2,NME4	3/25
3_Summary	GO Biological Processes	GO:0005975	carbohydrate metabolic process	-16.1734	-12.3019	219,226,231,2027,2171,2729,2739,2805,2821,3417,3607,3939,4190,4199,4351,5091,5226,5230,5236,5238,5315,5373,5973,6515,6888,7157,7167,7360,8706,9446,10402,22934,51005,54344,55276,132789,140838,283209,283871,2321,5723,7040,7428,95,440,1491,216,2817,3339,375790,131,218	ALDH1B1,ALDOA,AKR1B1,ENO3,FABP5,GCLC,GLO1,GOT1,GPI,IDH1,FOXK2,LDHA,MDH1,ME1,MPI,PC,PGD,PGK1,PGM1,PGM3,PKM,PMM2,RENBP,SLC2A3,TALDO1,TP53,TPI1,UGP2,B3GALNT1,GSTO1,ST3GAL6,RPIA,AMDHD2,DPM3,PGM2,GNPDA2,NANP,PGM2L1,PGP,FLT1,PSPH,TGFB1,VHL,ACY1,ASNS,CTH,ALDH1A1,GPC1,HSPG2,AGRN,ADH7,ALDH3A1	52/-
3_Member	GO Biological Processes	GO:0005975	carbohydrate metabolic process	-16.1734	-12.3019	219,226,231,2027,2171,2729,2739,2805,2821,3417,3607,3939,4190,4199,4351,5091,5226,5230,5236,5238,5315,5373,5973,6515,6888,7157,7167,7360,8706,9446,10402,22934,51005,54344,55276,132789,140838,283209,283871	ALDH1B1,ALDOA,AKR1B1,ENO3,FABP5,GCLC,GLO1,GOT1,GPI,IDH1,FOXK2,LDHA,MDH1,ME1,MPI,PC,PGD,PGK1,PGM1,PGM3,PKM,PMM2,RENBP,SLC2A3,TALDO1,TP53,TPI1,UGP2,B3GALNT1,GSTO1,ST3GAL6,RPIA,AMDHD2,DPM3,PGM2,GNPDA2,NANP,PGM2L1,PGP	39/441
3_Member	GO Biological Processes	GO:0005996	monosaccharide metabolic process	-12.6868	-9.24132	226,231,2027,2171,2729,2805,2821,3607,4190,4351,5091,5226,5230,5236,5315,5373,6515,7157,7167,9446,22934,55276,283209	ALDOA,AKR1B1,ENO3,FABP5,GCLC,GOT1,GPI,FOXK2,MDH1,MPI,PC,PGD,PGK1,PGM1,PKM,PMM2,SLC2A3,TP53,TPI1,GSTO1,RPIA,PGM2,PGM2L1	23/188
3_Member	WikiPathways	WP4018	Clear cell renal cell carcinoma pathways	-10.7281	-7.55562	226,2027,2321,2821,3939,4190,4199,5230,5236,5315,5723,7040,7167,7428,55276	ALDOA,ENO3,FLT1,GPI,LDHA,MDH1,ME1,PGK1,PGM1,PKM,PSPH,TGFB1,TPI1,VHL,PGM2	15/86
3_Member	KEGG Pathway	hsa01230	Biosynthesis of amino acids	-10.4702	-7.3258	95,226,440,1491,2027,2805,3417,5091,5230,5315,5723,6888,7167,22934	ACY1,ALDOA,ASNS,CTH,ENO3,GOT1,IDH1,PC,PGK1,PKM,PSPH,TALDO1,TPI1,RPIA	14/75
3_Member	KEGG Pathway	hsa01200	Carbon metabolism	-9.86176	-6.76848	226,2027,2805,2821,3417,4190,4199,5091,5226,5230,5315,5723,6888,7167,22934,283871	ALDOA,ENO3,GOT1,GPI,IDH1,MDH1,ME1,PC,PGD,PGK1,PKM,PSPH,TALDO1,TPI1,RPIA,PGP	16/115
3_Member	WikiPathways	WP534	Glycolysis and gluconeogenesis	-9.69699	-6.67065	226,2027,2805,2821,3939,4190,5091,5230,5315,6515,7167	ALDOA,ENO3,GOT1,GPI,LDHA,MDH1,PC,PGK1,PKM,SLC2A3,TPI1	11/45
3_Member	GO Biological Processes	GO:0019318	hexose metabolic process	-9.50259	-6.5128	226,231,2027,2171,2805,2821,3607,4190,4351,5091,5230,5236,5315,5373,7157,7167,55276,283209	ALDOA,AKR1B1,ENO3,FABP5,GOT1,GPI,FOXK2,MDH1,MPI,PC,PGK1,PGM1,PKM,PMM2,TP53,TPI1,PGM2,PGM2L1	18/159
3_Member	Reactome Gene Sets	R-HSA-71387	Metabolism of carbohydrates	-9.35979	-6.42148	216,226,231,2027,2805,2817,2821,3339,4190,5091,5226,5230,5236,5315,6888,7167,7360,10402,22934,55276,132789,283209,283871,375790	ALDH1A1,ALDOA,AKR1B1,ENO3,GOT1,GPC1,GPI,HSPG2,MDH1,PC,PGD,PGK1,PGM1,PKM,TALDO1,TPI1,UGP2,ST3GAL6,RPIA,PGM2,GNPDA2,PGM2L1,PGP,AGRN	24/297
3_Member	KEGG Pathway	hsa00010	Glycolysis / Gluconeogenesis	-8.84383	-6.05157	131,218,219,226,2027,2821,3939,5230,5236,5315,7167,55276	ADH7,ALDH3A1,ALDH1B1,ALDOA,ENO3,GPI,LDHA,PGK1,PGM1,PKM,TPI1,PGM2	12/67
3_Member	GO Biological Processes	GO:0006006	glucose metabolic process	-7.79325	-5.21554	2027,2171,2805,2821,3607,4190,5091,5230,5236,5315,7157,7167,55276,283209	ENO3,FABP5,GOT1,GPI,FOXK2,MDH1,PC,PGK1,PGM1,PKM,TP53,TPI1,PGM2,PGM2L1	14/118
3_Member	WikiPathways	WP4629	Aerobic glycolysis	-7.68266	-5.11225	226,2821,3939,5230,5315,7167	ALDOA,GPI,LDHA,PGK1,PKM,TPI1	6/12
3_Member	GO Biological Processes	GO:0006090	pyruvate metabolic process	-7.60335	-5.0501	226,2027,2821,3607,3939,4199,5091,5230,5236,5315,7167	ALDOA,ENO3,GPI,FOXK2,LDHA,ME1,PC,PGK1,PGM1,PKM,TPI1	11/69
3_Member	GO Biological Processes	GO:0006096	glycolytic process	-7.30757	-4.83407	226,2027,2821,3607,3939,5230,5236,5315,7167	ALDOA,ENO3,GPI,FOXK2,LDHA,PGK1,PGM1,PKM,TPI1	9/44
3_Member	GO Biological Processes	GO:0016051	carbohydrate biosynthetic process	-7.29504	-4.8273	231,2027,2805,2821,4190,5091,5226,5230,5236,7167,7360,8706,10402,283871	AKR1B1,ENO3,GOT1,GPI,MDH1,PC,PGD,PGK1,PGM1,TPI1,UGP2,B3GALNT1,ST3GAL6,PGP	14/129
3_Member	Reactome Gene Sets	R-HSA-70326	Glucose metabolism	-7.17704	-4.72611	226,2027,2805,2821,4190,5091,5230,5315,7167,132789,283209,283871	ALDOA,ENO3,GOT1,GPI,MDH1,PC,PGK1,PKM,TPI1,GNPDA2,PGM2L1,PGP	12/93
3_Member	GO Biological Processes	GO:0046364	monosaccharide biosynthetic process	-7.15646	-4.71099	231,2027,2805,2821,4190,5091,5226,5230,5236,7167	AKR1B1,ENO3,GOT1,GPI,MDH1,PC,PGD,PGK1,PGM1,TPI1	10/60
3_Member	Reactome Gene Sets	R-HSA-70263	Gluconeogenesis	-6.95869	-4.55952	226,2027,2805,2821,4190,5091,5230,7167	ALDOA,ENO3,GOT1,GPI,MDH1,PC,PGK1,TPI1	8/35
3_Member	GO Biological Processes	GO:0019319	hexose biosynthetic process	-6.72114	-4.38119	231,2027,2805,2821,4190,5091,5230,5236,7167	AKR1B1,ENO3,GOT1,GPI,MDH1,PC,PGK1,PGM1,TPI1	9/51
3_Member	WikiPathways	WP1946	Cori cycle	-6.58743	-4.26006	226,2821,3939,5230,6888,7167	ALDOA,GPI,LDHA,PGK1,TALDO1,TPI1	6/17
3_Member	GO Biological Processes	GO:0016052	carbohydrate catabolic process	-6.36474	-4.09897	226,2027,2821,3607,3939,5226,5230,5236,5315,7157,7167,55276	ALDOA,ENO3,GPI,FOXK2,LDHA,PGD,PGK1,PGM1,PKM,TP53,TPI1,PGM2	12/110
3_Member	GO Biological Processes	GO:0006094	gluconeogenesis	-5.83849	-3.66019	2027,2805,2821,4190,5091,5230,5236,7167	ENO3,GOT1,GPI,MDH1,PC,PGK1,PGM1,TPI1	8/48
3_Member	GO Biological Processes	GO:0006007	glucose catabolic process	-5.59524	-3.47968	2027,3607,5230,5315,7157,7167	ENO3,FOXK2,PGK1,PKM,TP53,TPI1	6/24
3_Member	Reactome Gene Sets	R-HSA-70171	Glycolysis	-5.36203	-3.29451	226,2027,2821,5230,5315,7167,132789,283209,283871	ALDOA,ENO3,GPI,PGK1,PKM,TPI1,GNPDA2,PGM2L1,PGP	9/73
3_Member	GO Biological Processes	GO:0006735	NADH regeneration	-4.98713	-2.99841	2027,3607,5230,5315,7167	ENO3,FOXK2,PGK1,PKM,TPI1	5/18
3_Member	GO Biological Processes	GO:0061621	canonical glycolysis	-4.98713	-2.99841	2027,3607,5230,5315,7167	ENO3,FOXK2,PGK1,PKM,TPI1	5/18
3_Member	GO Biological Processes	GO:0061718	glucose catabolic process to pyruvate	-4.98713	-2.99841	2027,3607,5230,5315,7167	ENO3,FOXK2,PGK1,PKM,TPI1	5/18
3_Member	GO Biological Processes	GO:0061615	glycolytic process through fructose-6-phosphate	-4.74187	-2.79985	2027,3607,5230,5315,7167	ENO3,FOXK2,PGK1,PKM,TPI1	5/20
3_Member	GO Biological Processes	GO:0061620	glycolytic process through glucose-6-phosphate	-4.74187	-2.79985	2027,3607,5230,5315,7167	ENO3,FOXK2,PGK1,PKM,TPI1	5/20
3_Member	GO Biological Processes	GO:0019320	hexose catabolic process	-4.17853	-2.36905	2027,3607,5230,5315,7157,7167	ENO3,FOXK2,PGK1,PKM,TP53,TPI1	6/41
3_Member	GO Biological Processes	GO:0046365	monosaccharide catabolic process	-3.73598	-2.02591	2027,3607,5230,5315,7157,7167	ENO3,FOXK2,PGK1,PKM,TP53,TPI1	6/49
4_Summary	KEGG Pathway	hsa00520	Amino sugar and nucleotide sugar metabolism	-13.2127	-9.64234	2821,4351,5236,5238,5373,5973,7360,29925,29926,51005,51167,55276,132789,140838,10402,54344,144245,95,100,2729,2817,2937,3251,3339,3417,4860,5091,6888,22934,54507,375790,226,231,7167,2153,7277,9871,10382,10652,26286	GPI,MPI,PGM1,PGM3,PMM2,RENBP,UGP2,GMPPB,GMPPA,AMDHD2,CYB5R4,PGM2,GNPDA2,NANP,ST3GAL6,DPM3,ALG10B,ACY1,ADA,GCLC,GPC1,GSS,HPRT1,HSPG2,IDH1,PNP,PC,TALDO1,RPIA,ADAMTSL4,AGRN,ALDOA,AKR1B1,TPI1,F5,TUBA4A,SEC24D,TUBB4A,YKT6,ARFGAP3	40/-
4_Member	KEGG Pathway	hsa00520	Amino sugar and nucleotide sugar metabolism	-13.2127	-9.64234	2821,4351,5236,5238,5373,5973,7360,29925,29926,51005,51167,55276,132789,140838	GPI,MPI,PGM1,PGM3,PMM2,RENBP,UGP2,GMPPB,GMPPA,AMDHD2,CYB5R4,PGM2,GNPDA2,NANP	14/49
4_Member	KEGG Pathway	hsa01250	Biosynthesis of nucleotide sugars	-9.33867	-6.42148	2821,4351,5236,5238,5373,7360,29925,29926,55276,140838	GPI,MPI,PGM1,PGM3,PMM2,UGP2,GMPPB,GMPPA,PGM2,NANP	10/37
4_Member	Reactome Gene Sets	R-HSA-446193	Biosynthesis of the N-glycan precursor (dolichol lipid-linked oligosaccharide, LLO) and transfer to a nascent protein	-7.03365	-4.60937	4351,5238,5373,5973,10402,29925,29926,51005,54344,140838,144245	MPI,PGM3,PMM2,RENBP,ST3GAL6,GMPPB,GMPPA,AMDHD2,DPM3,NANP,ALG10B	11/78
4_Member	Reactome Gene Sets	R-HSA-446219	Synthesis of substrates in N-glycan biosythesis	-6.94719	-4.55288	4351,5238,5373,5973,10402,29925,29926,51005,54344,140838	MPI,PGM3,PMM2,RENBP,ST3GAL6,GMPPB,GMPPA,AMDHD2,DPM3,NANP	10/63
4_Member	Reactome Gene Sets	R-HSA-5668914	Diseases of metabolism	-6.45039	-4.15829	95,100,2729,2817,2937,3251,3339,3417,4351,4860,5091,5236,5373,6888,22934,54344,54507,375790	ACY1,ADA,GCLC,GPC1,GSS,HPRT1,HSPG2,IDH1,MPI,PNP,PC,PGM1,PMM2,TALDO1,RPIA,DPM3,ADAMTSL4,AGRN	18/249
4_Member	Reactome Gene Sets	R-HSA-446205	Synthesis of GDP-mannose	-6.37717	-4.10779	4351,5373,29925,29926	MPI,PMM2,GMPPB,GMPPA	4/5
4_Member	GO Biological Processes	GO:0009226	nucleotide-sugar biosynthetic process	-6.25918	-4.01443	4351,5238,5373,29925,51005,132789	MPI,PGM3,PMM2,GMPPB,AMDHD2,GNPDA2	6/19
4_Member	KEGG Pathway	hsa00051	Fructose and mannose metabolism	-5.91868	-3.71934	226,231,4351,5373,7167,29925,29926	ALDOA,AKR1B1,MPI,PMM2,TPI1,GMPPB,GMPPA	7/33
4_Member	GO Biological Processes	GO:0009225	nucleotide-sugar metabolic process	-5.64704	-3.51597	4351,5238,5373,7360,29925,51005,132789	MPI,PGM3,PMM2,UGP2,GMPPB,AMDHD2,GNPDA2	7/36
4_Member	GO Biological Processes	GO:0009298	GDP-mannose biosynthetic process	-4.70493	-2.77633	4351,5373,29925	MPI,PMM2,GMPPB	3/4
4_Member	Reactome Gene Sets	R-HSA-446203	Asparagine N-linked glycosylation	-4.63961	-2.72722	2153,4351,5238,5373,5973,7277,9871,10382,10402,10652,26286,29925,29926,51005,54344,140838,144245	F5,MPI,PGM3,PMM2,RENBP,TUBA4A,SEC24D,TUBB4A,ST3GAL6,YKT6,ARFGAP3,GMPPB,GMPPA,AMDHD2,DPM3,NANP,ALG10B	17/304
4_Member	Reactome Gene Sets	R-HSA-5609975	Diseases associated with glycosylation precursor biosynthesis	-4.00029	-2.22807	4351,5236,5373,54344	MPI,PGM1,PMM2,DPM3	4/15
4_Member	GO Biological Processes	GO:0019673	GDP-mannose metabolic process	-3.77964	-2.05433	4351,5373,29925	MPI,PMM2,GMPPB	3/7
4_Member	WikiPathways	WP4521	Glycosylation and related congenital defects	-3.09227	-1.54236	4351,5373,29925,54344	MPI,PMM2,GMPPB,DPM3	4/25
4_Member	Reactome Gene Sets	R-HSA-3781865	Diseases of glycosylation	-2.47774	-1.08631	2817,3339,4351,5236,5373,54344,54507,375790	GPC1,HSPG2,MPI,PGM1,PMM2,DPM3,ADAMTSL4,AGRN	8/143
5_Summary	GO Biological Processes	GO:0044283	small molecule biosynthetic process	-11.336	-8.06663	100,216,231,440,1382,1491,2027,2224,2805,2821,2946,3251,3422,3613,4023,4048,4190,4282,4860,5091,5226,5230,5236,5723,7167,8644,9536,11315,29108,55276,84245,140838,283871,131,226,1622,3029,3417,3607,3939,4199,5315,6622,7157,10965,84266,145482	ADA,ALDH1A1,AKR1B1,ASNS,CRABP2,CTH,ENO3,FDPS,GOT1,GPI,GSTM2,HPRT1,IDI1,IMPA2,LPL,LTA4H,MDH1,MIF,PNP,PC,PGD,PGK1,PGM1,PSPH,TPI1,AKR1C3,PTGES,PARK7,PYCARD,PGM2,MRI1,NANP,PGP,ADH7,ALDOA,DBI,HAGH,IDH1,FOXK2,LDHA,ME1,PKM,SNCA,TP53,ACOT2,ALKBH7,PTGR2	47/-
5_Member	GO Biological Processes	GO:0044283	small molecule biosynthetic process	-11.336	-8.06663	100,216,231,440,1382,1491,2027,2224,2805,2821,2946,3251,3422,3613,4023,4048,4190,4282,4860,5091,5226,5230,5236,5723,7167,8644,9536,11315,29108,55276,84245,140838,283871	ADA,ALDH1A1,AKR1B1,ASNS,CRABP2,CTH,ENO3,FDPS,GOT1,GPI,GSTM2,HPRT1,IDI1,IMPA2,LPL,LTA4H,MDH1,MIF,PNP,PC,PGD,PGK1,PGM1,PSPH,TPI1,AKR1C3,PTGES,PARK7,PYCARD,PGM2,MRI1,NANP,PGP	33/456
5_Member	GO Biological Processes	GO:0032787	monocarboxylic acid metabolic process	-8.18428	-5.50782	131,216,226,231,1382,1622,2027,2821,2946,3029,3417,3607,3939,4023,4199,4282,5091,5226,5230,5236,5315,6622,7157,7167,8644,9536,10965,11315,84266,145482	ADH7,ALDH1A1,ALDOA,AKR1B1,CRABP2,DBI,ENO3,GPI,GSTM2,HAGH,IDH1,FOXK2,LDHA,LPL,ME1,MIF,PC,PGD,PGK1,PGM1,PKM,SNCA,TP53,TPI1,AKR1C3,PTGES,ACOT2,PARK7,ALKBH7,PTGR2	30/512
5_Member	GO Biological Processes	GO:0046394	carboxylic acid biosynthetic process	-5.22502	-3.18182	216,231,440,1382,1491,2805,2946,4023,4048,4282,5723,8644,9536,11315,29108,84245,140838	ALDH1A1,AKR1B1,ASNS,CRABP2,CTH,GOT1,GSTM2,LPL,LTA4H,MIF,PSPH,AKR1C3,PTGES,PARK7,PYCARD,MRI1,NANP	17/274
5_Member	GO Biological Processes	GO:0016053	organic acid biosynthetic process	-5.16259	-3.13831	216,231,440,1382,1491,2805,2946,4023,4048,4282,5723,8644,9536,11315,29108,84245,140838	ALDH1A1,AKR1B1,ASNS,CRABP2,CTH,GOT1,GSTM2,LPL,LTA4H,MIF,PSPH,AKR1C3,PTGES,PARK7,PYCARD,MRI1,NANP	17/277
5_Member	GO Biological Processes	GO:0006631	fatty acid metabolic process	-2.00445	-0.742606	131,231,1622,2946,4023,4282,6622,8644,9536,10965,84266,145482	ADH7,AKR1B1,DBI,GSTM2,LPL,MIF,SNCA,AKR1C3,PTGES,ACOT2,ALKBH7,PTGR2	12/321
6_Summary	GO Biological Processes	GO:0031344	regulation of cell projection organization	-11.1432	-7.90863	25,27,112,999,1072,1382,1398,1540,1857,2335,2664,2665,2670,4134,4135,4898,5058,5063,5217,5357,5396,7074,9693,10013,10152,10677,11075,11344,23242,25793,26499,54874,56896,57609,57698,64787,65078,162979,348110,375790,2147,5270,5803,6692,7040,7157,58497,1410,2395,2810,3872,6195,9043,9564,23411,84678,4502,6647,79068,83481,1073,5341,25802,29108,54961,2244,2729,100,941,4860,10524	ABL1,ABL2,ADCY6,CDH1,CFL1,CRABP2,CRK,CYLD,DVL3,FN1,GDI1,GDI2,GFAP,MAP4,MAP6,NRDC,PAK1,PAK3,PFN2,PLS1,PRRX1,TIAM1,RAPGEF2,HDAC6,ABI2,AVIL,STMN2,TWF2,COBL,FBXO7,PLEK2,FNBP1L,DPYSL5,DIP2B,SHTN1,EPS8L2,RTN4R,ZNF296,ARPIN,AGRN,F2,SERPINE2,PTPRZ1,SPINT1,TGFB1,TP53,PRUNE1,CRYAB,FXN,SFN,KRT17,RPS6KA1,SPAG9,BCAR1,SIRT1,KDM2B,MT2A,SOD1,FTO,EPPK1,CFL2,PLEK,LMOD1,PYCARD,SSH3,FGB,GCLC,ADA,CD80,PNP,KAT5	71/-
6_Member	GO Biological Processes	GO:0031344	regulation of cell projection organization	-11.1432	-7.90863	25,27,112,999,1072,1382,1398,1540,1857,2335,2664,2665,2670,4134,4135,4898,5058,5063,5217,5357,5396,7074,9693,10013,10152,10677,11075,11344,23242,25793,26499,54874,56896,57609,57698,64787,65078,162979,348110,375790	ABL1,ABL2,ADCY6,CDH1,CFL1,CRABP2,CRK,CYLD,DVL3,FN1,GDI1,GDI2,GFAP,MAP4,MAP6,NRDC,PAK1,PAK3,PFN2,PLS1,PRRX1,TIAM1,RAPGEF2,HDAC6,ABI2,AVIL,STMN2,TWF2,COBL,FBXO7,PLEK2,FNBP1L,DPYSL5,DIP2B,SHTN1,EPS8L2,RTN4R,ZNF296,ARPIN,AGRN	40/662
6_Member	GO Biological Processes	GO:0120035	regulation of plasma membrane bounded cell projection organization	-10.8452	-7.64276	25,27,112,999,1072,1382,1398,1540,2335,2664,2665,2670,4134,4135,4898,5058,5063,5217,5357,5396,7074,9693,10013,10152,10677,11075,11344,23242,25793,26499,54874,56896,57609,57698,64787,65078,162979,348110,375790	ABL1,ABL2,ADCY6,CDH1,CFL1,CRABP2,CRK,CYLD,FN1,GDI1,GDI2,GFAP,MAP4,MAP6,NRDC,PAK1,PAK3,PFN2,PLS1,PRRX1,TIAM1,RAPGEF2,HDAC6,ABI2,AVIL,STMN2,TWF2,COBL,FBXO7,PLEK2,FNBP1L,DPYSL5,DIP2B,SHTN1,EPS8L2,RTN4R,ZNF296,ARPIN,AGRN	39/647
6_Member	GO Biological Processes	GO:0010975	regulation of neuron projection development	-8.81371	-6.05028	25,27,112,999,1072,1382,1398,2335,2664,2670,4135,4898,5058,5063,5396,7074,9693,10013,10152,10677,11075,11344,23242,25793,56896,57609,57698,65078,162979	ABL1,ABL2,ADCY6,CDH1,CFL1,CRABP2,CRK,FN1,GDI1,GFAP,MAP6,NRDC,PAK1,PAK3,PRRX1,TIAM1,RAPGEF2,HDAC6,ABI2,AVIL,STMN2,TWF2,COBL,FBXO7,DPYSL5,DIP2B,SHTN1,RTN4R,ZNF296	29/452
6_Member	GO Biological Processes	GO:0031346	positive regulation of cell projection organization	-6.57299	-4.25381	25,27,1382,1857,2335,2664,4135,4898,5063,7074,9693,10013,10152,10677,11075,11344,23242,26499,54874,57698,64787,375790	ABL1,ABL2,CRABP2,DVL3,FN1,GDI1,MAP6,NRDC,PAK3,TIAM1,RAPGEF2,HDAC6,ABI2,AVIL,STMN2,TWF2,COBL,PLEK2,FNBP1L,SHTN1,EPS8L2,AGRN	22/355
6_Member	GO Biological Processes	GO:0050767	regulation of neurogenesis	-6.46323	-4.15999	999,1382,2147,2335,2664,2670,4135,4898,5063,5270,5803,6692,7040,7074,7157,9693,10013,11344,56896,57609,57698,58497,65078	CDH1,CRABP2,F2,FN1,GDI1,GFAP,MAP6,NRDC,PAK3,SERPINE2,PTPRZ1,SPINT1,TGFB1,TIAM1,TP53,RAPGEF2,HDAC6,TWF2,DPYSL5,DIP2B,SHTN1,PRUNE1,RTN4R	23/390
6_Member	GO Biological Processes	GO:0050770	regulation of axonogenesis	-6.2997	-4.04805	999,1382,2335,2664,4135,4898,5058,5063,7074,10013,11344,57609,57698,65078	CDH1,CRABP2,FN1,GDI1,MAP6,NRDC,PAK1,PAK3,TIAM1,HDAC6,TWF2,DIP2B,SHTN1,RTN4R	14/155
6_Member	GO Biological Processes	GO:0001558	regulation of cell growth	-5.92544	-3.72301	25,999,1382,1410,2147,2335,2395,2664,2810,3872,5270,6195,7040,7157,9043,9564,10013,11344,23411,57609,57698,65078,84678	ABL1,CDH1,CRABP2,CRYAB,F2,FN1,FXN,GDI1,SFN,KRT17,SERPINE2,RPS6KA1,TGFB1,TP53,SPAG9,BCAR1,HDAC6,TWF2,SIRT1,DIP2B,SHTN1,RTN4R,KDM2B	23/419
6_Member	GO Biological Processes	GO:0040008	regulation of growth	-5.87884	-3.68857	25,999,1382,1410,2147,2335,2395,2664,2810,3872,4502,5270,5357,6195,6647,7040,7157,9043,9564,10013,11344,23411,57609,57698,65078,79068,83481,84678,375790	ABL1,CDH1,CRABP2,CRYAB,F2,FN1,FXN,GDI1,SFN,KRT17,MT2A,SERPINE2,PLS1,RPS6KA1,SOD1,TGFB1,TP53,SPAG9,BCAR1,HDAC6,TWF2,SIRT1,DIP2B,SHTN1,RTN4R,FTO,EPPK1,KDM2B,AGRN	29/620
6_Member	GO Biological Processes	GO:0051960	regulation of nervous system development	-5.62416	-3.50091	999,1382,2147,2335,2664,2670,4135,4898,5063,5270,5803,6692,7040,7074,7157,9693,10013,11344,56896,57609,57698,58497,65078,375790	CDH1,CRABP2,F2,FN1,GDI1,GFAP,MAP6,NRDC,PAK3,SERPINE2,PTPRZ1,SPINT1,TGFB1,TIAM1,TP53,RAPGEF2,HDAC6,TWF2,DPYSL5,DIP2B,SHTN1,PRUNE1,RTN4R,AGRN	24/469
6_Member	GO Biological Processes	GO:0061387	regulation of extent of cell growth	-4.87208	-2.89644	25,999,1382,2335,2664,10013,11344,57609,57698,65078	ABL1,CDH1,CRABP2,FN1,GDI1,HDAC6,TWF2,DIP2B,SHTN1,RTN4R	10/105
6_Member	GO Biological Processes	GO:0032535	regulation of cellular component size	-4.76226	-2.81338	25,999,1073,1382,2335,2664,5063,5217,5341,5357,10013,10677,11344,25802,29108,54961,57609,57698,65078	ABL1,CDH1,CFL2,CRABP2,FN1,GDI1,PAK3,PFN2,PLEK,PLS1,HDAC6,AVIL,TWF2,LMOD1,PYCARD,SSH3,DIP2B,SHTN1,RTN4R	19/360
6_Member	GO Biological Processes	GO:0050769	positive regulation of neurogenesis	-4.71862	-2.78503	1382,2335,2664,2670,4135,4898,5063,5270,5803,6692,7040,7074,10013,11344,57698	CRABP2,FN1,GDI1,GFAP,MAP6,NRDC,PAK3,SERPINE2,PTPRZ1,SPINT1,TGFB1,TIAM1,HDAC6,TWF2,SHTN1	15/240
6_Member	GO Biological Processes	GO:0090066	regulation of anatomical structure size	-4.67112	-2.75231	25,112,999,1073,1382,2244,2335,2664,2729,5063,5217,5341,5357,6647,10013,10677,11344,25802,29108,54961,57609,57698,65078	ABL1,ADCY6,CDH1,CFL2,CRABP2,FGB,FN1,GDI1,GCLC,PAK3,PFN2,PLEK,PLS1,SOD1,HDAC6,AVIL,TWF2,LMOD1,PYCARD,SSH3,DIP2B,SHTN1,RTN4R	23/500
6_Member	GO Biological Processes	GO:0030516	regulation of axon extension	-4.61179	-2.70414	25,999,2335,2664,10013,11344,57609,57698,65078	ABL1,CDH1,FN1,GDI1,HDAC6,TWF2,DIP2B,SHTN1,RTN4R	9/90
6_Member	GO Biological Processes	GO:0051962	positive regulation of nervous system development	-4.36784	-2.51482	1382,2335,2664,2670,4135,4898,5063,5270,5803,6692,7040,7074,10013,11344,57698,375790	CRABP2,FN1,GDI1,GFAP,MAP6,NRDC,PAK3,SERPINE2,PTPRZ1,SPINT1,TGFB1,TIAM1,HDAC6,TWF2,SHTN1,AGRN	16/288
6_Member	GO Biological Processes	GO:0050772	positive regulation of axonogenesis	-4.32176	-2.47563	1382,2335,2664,4135,4898,7074,11344,57698	CRABP2,FN1,GDI1,MAP6,NRDC,TIAM1,TWF2,SHTN1	8/76
6_Member	GO Biological Processes	GO:0048638	regulation of developmental growth	-4.22669	-2.40448	25,999,1382,2335,2395,2664,5357,6647,9043,10013,11344,57609,57698,65078,79068,83481,375790	ABL1,CDH1,CRABP2,FN1,FXN,GDI1,PLS1,SOD1,SPAG9,HDAC6,TWF2,DIP2B,SHTN1,RTN4R,FTO,EPPK1,AGRN	17/328
6_Member	GO Biological Processes	GO:0030307	positive regulation of cell growth	-3.90743	-2.1543	1382,2147,2335,2395,2664,2810,3872,6195,11344,57698,84678	CRABP2,F2,FN1,FXN,GDI1,SFN,KRT17,RPS6KA1,TWF2,SHTN1,KDM2B	11/163
6_Member	GO Biological Processes	GO:0008361	regulation of cell size	-3.59438	-1.91699	25,999,1382,2335,2664,5341,10013,11344,57609,57698,65078	ABL1,CDH1,CRABP2,FN1,GDI1,PLEK,HDAC6,TWF2,DIP2B,SHTN1,RTN4R	11/177
6_Member	GO Biological Processes	GO:0010720	positive regulation of cell development	-3.58733	-1.91253	100,941,1382,2335,2664,2670,4135,4860,4898,5063,5270,5803,6692,7040,7074,10013,10524,11344,57698	ADA,CD80,CRABP2,FN1,GDI1,GFAP,MAP6,PNP,NRDC,PAK3,SERPINE2,PTPRZ1,SPINT1,TGFB1,TIAM1,HDAC6,KAT5,TWF2,SHTN1	19/442
6_Member	GO Biological Processes	GO:0045927	positive regulation of growth	-3.26941	-1.6752	1382,2147,2335,2395,2664,2810,3872,5357,6195,11344,57698,84678,375790	CRABP2,F2,FN1,FXN,GDI1,SFN,KRT17,PLS1,RPS6KA1,TWF2,SHTN1,KDM2B,AGRN	13/257
6_Member	GO Biological Processes	GO:0045773	positive regulation of axon extension	-2.53395	-1.13184	2335,2664,11344,57698	FN1,GDI1,TWF2,SHTN1	4/35
7_Summary	Reactome Gene Sets	R-HSA-109582	Hemostasis	-10.171	-7.05288	25,213,226,408,489,1072,1398,2147,2153,2162,2244,2335,2817,3676,3835,4072,4282,5269,5270,5340,5341,5627,6647,7035,7040,7157,7277,7414,8525,8795,9493,9564,9585,10382,10487,10916,146909	ABL1,ALB,ALDOA,ARRB1,ATP2A3,CFL1,CRK,F2,F5,F13A1,FGB,FN1,GPC1,ITGA4,KIF22,EPCAM,MIF,SERPINB6,SERPINE2,PLG,PLEK,PROS1,SOD1,TFPI,TGFB1,TP53,TUBA4A,VCL,DGKZ,TNFRSF10B,KIF23,BCAR1,KIF20B,TUBB4A,CAP1,MAGED2,KIF18B	37/-
7_Member	Reactome Gene Sets	R-HSA-109582	Hemostasis	-10.171	-7.05288	25,213,226,408,489,1072,1398,2147,2153,2162,2244,2335,2817,3676,3835,4072,4282,5269,5270,5340,5341,5627,6647,7035,7040,7157,7277,7414,8525,8795,9493,9564,9585,10382,10487,10916,146909	ABL1,ALB,ALDOA,ARRB1,ATP2A3,CFL1,CRK,F2,F5,F13A1,FGB,FN1,GPC1,ITGA4,KIF22,EPCAM,MIF,SERPINB6,SERPINE2,PLG,PLEK,PROS1,SOD1,TFPI,TGFB1,TP53,TUBA4A,VCL,DGKZ,TNFRSF10B,KIF23,BCAR1,KIF20B,TUBB4A,CAP1,MAGED2,KIF18B	37/621
7_Member	Reactome Gene Sets	R-HSA-114608	Platelet degranulation	-9.10517	-6.24798	213,226,1072,2153,2162,2244,2335,5340,5341,5627,6647,7040,7277,7414,10487,10916	ALB,ALDOA,CFL1,F5,F13A1,FGB,FN1,PLG,PLEK,PROS1,SOD1,TGFB1,TUBA4A,VCL,CAP1,MAGED2	16/129
7_Member	Reactome Gene Sets	R-HSA-76005	Response to elevated platelet cytosolic Ca2+	-8.85865	-6.05416	213,226,1072,2153,2162,2244,2335,5340,5341,5627,6647,7040,7277,7414,10487,10916	ALB,ALDOA,CFL1,F5,F13A1,FGB,FN1,PLG,PLEK,PROS1,SOD1,TGFB1,TUBA4A,VCL,CAP1,MAGED2	16/134
7_Member	Reactome Gene Sets	R-HSA-76002	Platelet activation, signaling and aggregation	-8.17505	-5.50774	213,226,408,1072,1398,2147,2153,2162,2244,2335,5340,5341,5627,6647,7040,7277,7414,8525,9564,10487,10916	ALB,ALDOA,ARRB1,CFL1,CRK,F2,F5,F13A1,FGB,FN1,PLG,PLEK,PROS1,SOD1,TGFB1,TUBA4A,VCL,DGKZ,BCAR1,CAP1,MAGED2	21/263
8_Summary	GO Biological Processes	GO:0006749	glutathione metabolic process	-9.70477	-6.67065	2729,2739,2937,2941,2946,2949,2952,3029,3417,6647,9446,11315,5226,79017,3251,4830,4831,4833,7378,51727,95,131,216,218,219,6820,7360,10380,84836,25,112,182,867,999,1398,1728,1857,2147,2335,3162,3912,4609,6667,7040,7157,7296,7428,57449,114112,100,642,1001,4023,4860,5395,6622,7320,7345,2817,6885,7295,27,1350,4512,4708,8644,408,6195,231,26151	GCLC,GLO1,GSS,GSTA4,GSTM2,GSTM5,GSTT1,HAGH,IDH1,SOD1,GSTO1,PARK7,PGD,GGCT,HPRT1,NME1,NME2,NME4,UPP1,CMPK1,ACY1,ADH7,ALDH1A1,ALDH3A1,ALDH1B1,SULT2B1,UGP2,BPNT1,ABHD14B,ABL1,ADCY6,JAG1,CBL,CDH1,CRK,NQO1,DVL3,F2,FN1,HMOX1,LAMB1,MYC,SP1,TGFB1,TP53,TXNRD1,VHL,PLEKHG5,TXNRD3,ADA,BLMH,CDH3,LPL,PNP,PMS2,SNCA,UBE2B,UCHL1,GPC1,MAP3K7,TXN,ABL2,COX7C,COX1,NDUFB2,AKR1C3,ARRB1,RPS6KA1,AKR1B1,NAT9	70/-
8_Member	GO Biological Processes	GO:0006749	glutathione metabolic process	-9.70477	-6.67065	2729,2739,2937,2941,2946,2949,2952,3029,3417,6647,9446,11315	GCLC,GLO1,GSS,GSTA4,GSTM2,GSTM5,GSTT1,HAGH,IDH1,SOD1,GSTO1,PARK7	12/57
8_Member	KEGG Pathway	hsa00480	Glutathione metabolism	-7.37853	-4.88731	2729,2937,2941,2946,2949,2952,3417,5226,9446,79017	GCLC,GSS,GSTA4,GSTM2,GSTM5,GSTT1,IDH1,PGD,GSTO1,GGCT	10/57
8_Member	KEGG Pathway	hsa00983	Drug metabolism - other enzymes	-6.91766	-4.53289	2941,2946,2949,2952,3251,4830,4831,4833,7378,9446,51727	GSTA4,GSTM2,GSTM5,GSTT1,HPRT1,NME1,NME2,NME4,UPP1,GSTO1,CMPK1	11/80
8_Member	Reactome Gene Sets	R-HSA-156590	Glutathione conjugation	-6.85608	-4.49429	2729,2937,2941,2946,2949,2952,9446,79017	GCLC,GSS,GSTA4,GSTM2,GSTM5,GSTT1,GSTO1,GGCT	8/36
8_Member	Reactome Gene Sets	R-HSA-211859	Biological oxidations	-6.47775	-4.16662	95,131,216,218,219,2729,2937,2941,2946,2949,2952,6820,7360,9446,10380,79017,84836	ACY1,ADH7,ALDH1A1,ALDH3A1,ALDH1B1,GCLC,GSS,GSTA4,GSTM2,GSTM5,GSTT1,SULT2B1,UGP2,GSTO1,BPNT1,GGCT,ABHD14B	17/222
8_Member	Reactome Gene Sets	R-HSA-156580	Phase II - Conjugation of compounds	-6.4082	-4.12783	2729,2937,2941,2946,2949,2952,6820,7360,9446,10380,79017,84836	GCLC,GSS,GSTA4,GSTM2,GSTM5,GSTT1,SULT2B1,UGP2,GSTO1,BPNT1,GGCT,ABHD14B	12/109
8_Member	KEGG Pathway	hsa05200	Pathways in cancer	-5.19803	-3.16334	25,112,182,867,999,1398,1728,1857,2147,2335,2941,2946,2949,2952,3162,3912,4609,6667,7040,7157,7296,7428,9446,57449,114112	ABL1,ADCY6,JAG1,CBL,CDH1,CRK,NQO1,DVL3,F2,FN1,GSTA4,GSTM2,GSTM5,GSTT1,HMOX1,LAMB1,MYC,SP1,TGFB1,TP53,TXNRD1,VHL,GSTO1,PLEKHG5,TXNRD3	25/531
8_Member	KEGG Pathway	hsa05225	Hepatocellular carcinoma	-5.14646	-3.12426	1728,1857,2941,2946,2949,2952,3162,4609,7040,7157,7296,9446,114112	NQO1,DVL3,GSTA4,GSTM2,GSTM5,GSTT1,HMOX1,MYC,TGFB1,TP53,TXNRD1,GSTO1,TXNRD3	13/168
8_Member	GO Biological Processes	GO:0009410	response to xenobiotic stimulus	-4.73894	-2.79862	25,100,218,642,999,1001,1728,2729,2941,2946,3162,4023,4609,4860,5395,6622,6647,7157,7320,7345,9446	ABL1,ADA,ALDH3A1,BLMH,CDH1,CDH3,NQO1,GCLC,GSTA4,GSTM2,HMOX1,LPL,MYC,PNP,PMS2,SNCA,SOD1,TP53,UBE2B,UCHL1,GSTO1	21/427
8_Member	KEGG Pathway	hsa05418	Fluid shear stress and atherosclerosis	-4.53562	-2.65393	1728,2817,2941,2946,2949,2952,3162,6885,7157,7295,9446	NQO1,GPC1,GSTA4,GSTM2,GSTM5,GSTT1,HMOX1,MAP3K7,TP53,TXN,GSTO1	11/139
8_Member	KEGG Pathway	hsa05208	Chemical carcinogenesis - reactive oxygen species	-4.4651	-2.59076	25,27,1350,1728,2941,2946,2949,2952,3162,4512,4708,6647,8644,9446	ABL1,ABL2,COX7C,NQO1,GSTA4,GSTM2,GSTM5,GSTT1,HMOX1,COX1,NDUFB2,SOD1,AKR1C3,GSTO1	14/223
8_Member	KEGG Pathway	hsa00982	Drug metabolism - cytochrome P450	-3.63084	-1.94692	131,218,2941,2946,2949,2952,9446	ADH7,ALDH3A1,GSTA4,GSTM2,GSTM5,GSTT1,GSTO1	7/72
8_Member	KEGG Pathway	hsa00980	Metabolism of xenobiotics by cytochrome P450	-3.41536	-1.78049	131,218,2941,2946,2949,2952,9446	ADH7,ALDH3A1,GSTA4,GSTM2,GSTM5,GSTT1,GSTO1	7/78
8_Member	KEGG Pathway	hsa01524	Platinum drug resistance	-2.80042	-1.31991	2941,2946,2949,2952,7157,9446	GSTA4,GSTM2,GSTM5,GSTT1,TP53,GSTO1	6/73
8_Member	KEGG Pathway	hsa05207	Chemical carcinogenesis - receptor activation	-2.42412	-1.04823	112,182,408,2941,2946,2949,2952,4609,6195,9446	ADCY6,JAG1,ARRB1,GSTA4,GSTM2,GSTM5,GSTT1,MYC,RPS6KA1,GSTO1	10/212
8_Member	WikiPathways	WP702	Metapathway biotransformation Phase I and II	-2.31919	-0.975799	231,2937,2941,2946,2949,6820,8644,9446,26151	AKR1B1,GSS,GSTA4,GSTM2,GSTM5,SULT2B1,AKR1C3,GSTO1,NAT9	9/185
8_Member	GO Biological Processes	GO:0071466	cellular response to xenobiotic stimulus	-2.24483	-0.915777	100,218,1728,2941,2946,4609,7157,7345,9446	ADA,ALDH3A1,NQO1,GSTA4,GSTM2,MYC,TP53,UCHL1,GSTO1	9/190
8_Member	KEGG Pathway	hsa05204	Chemical carcinogenesis - DNA adducts	-2.17973	-0.871778	2941,2946,2949,2952,9446	GSTA4,GSTM2,GSTM5,GSTT1,GSTO1	5/69
9_Summary	GO Biological Processes	GO:0030162	regulation of proteolysis	-9.49963	-6.5128	489,831,1410,1476,1611,1992,2147,2729,2810,2821,3093,3336,4130,4287,4609,4898,5037,5269,5270,5272,5886,5973,6195,6622,6692,7035,7157,7448,9491,10013,10016,11315,23411,29108,56616,57095,85409,93974,653145,25,2280,3958,5524,6992,10156,867,1728,7345,25793,29085	ATP2A3,CAST,CRYAB,CSTB,DAP,SERPINB1,F2,GCLC,SFN,GPI,UBE2K,HSPE1,MAP1A,ATXN3,MYC,NRDC,PEBP1,SERPINB6,SERPINE2,SERPINB9,RAD23A,RENBP,RPS6KA1,SNCA,SPINT1,TFPI,TP53,VTN,PSMF1,HDAC6,PDCD6,PARK7,SIRT1,PYCARD,DIABLO,PITHD1,NKD2,ATP5IF1,ANXA8,ABL1,FKBP1A,LGALS3,PTPA,PPP1R11,RASA4,CBL,NQO1,UCHL1,FBXO7,PHPT1	50/-
9_Member	GO Biological Processes	GO:0030162	regulation of proteolysis	-9.49963	-6.5128	489,831,1410,1476,1611,1992,2147,2729,2810,2821,3093,3336,4130,4287,4609,4898,5037,5269,5270,5272,5886,5973,6195,6622,6692,7035,7157,7448,9491,10013,10016,11315,23411,29108,56616,57095,85409,93974,653145	ATP2A3,CAST,CRYAB,CSTB,DAP,SERPINB1,F2,GCLC,SFN,GPI,UBE2K,HSPE1,MAP1A,ATXN3,MYC,NRDC,PEBP1,SERPINB6,SERPINE2,SERPINB9,RAD23A,RENBP,RPS6KA1,SNCA,SPINT1,TFPI,TP53,VTN,PSMF1,HDAC6,PDCD6,PARK7,SIRT1,PYCARD,DIABLO,PITHD1,NKD2,ATP5IF1,ANXA8	39/719
9_Member	GO Biological Processes	GO:0051346	negative regulation of hydrolase activity	-9.02941	-6.186	25,831,1410,1476,1992,2280,2810,2821,3958,5037,5269,5270,5272,5524,5973,6195,6622,6692,6992,7035,7448,10156,11315,93974,653145	ABL1,CAST,CRYAB,CSTB,SERPINB1,FKBP1A,SFN,GPI,LGALS3,PEBP1,SERPINB6,SERPINE2,SERPINB9,PTPA,RENBP,RPS6KA1,SNCA,SPINT1,PPP1R11,TFPI,VTN,RASA4,PARK7,ATP5IF1,ANXA8	25/334
9_Member	GO Biological Processes	GO:0052547	regulation of peptidase activity	-8.30867	-5.61332	489,831,1410,1476,1611,1992,2810,2821,3336,4609,4898,5037,5269,5270,5272,5973,6195,6622,6692,7035,7448,10016,11315,23411,29108,56616,653145	ATP2A3,CAST,CRYAB,CSTB,DAP,SERPINB1,SFN,GPI,HSPE1,MYC,NRDC,PEBP1,SERPINB6,SERPINE2,SERPINB9,RENBP,RPS6KA1,SNCA,SPINT1,TFPI,VTN,PDCD6,PARK7,SIRT1,PYCARD,DIABLO,ANXA8	27/418
9_Member	GO Biological Processes	GO:0043086	negative regulation of catalytic activity	-8.02349	-5.3739	25,831,867,1410,1476,1728,1992,2280,2810,2821,3958,5037,5269,5270,5272,5524,5973,6195,6622,6692,6992,7035,7157,7345,7448,10013,10156,11315,23411,25793,29085,29108,93974,653145	ABL1,CAST,CBL,CRYAB,CSTB,NQO1,SERPINB1,FKBP1A,SFN,GPI,LGALS3,PEBP1,SERPINB6,SERPINE2,SERPINB9,PTPA,RENBP,RPS6KA1,SNCA,SPINT1,PPP1R11,TFPI,TP53,UCHL1,VTN,HDAC6,RASA4,PARK7,SIRT1,FBXO7,PHPT1,PYCARD,ATP5IF1,ANXA8	34/646
9_Member	GO Biological Processes	GO:0045861	negative regulation of proteolysis	-7.94725	-5.3147	831,1410,1476,1992,2147,2810,2821,4130,5037,5269,5270,5272,5973,6195,6622,6692,7035,7157,7448,9491,10013,11315,653145	CAST,CRYAB,CSTB,SERPINB1,F2,SFN,GPI,MAP1A,PEBP1,SERPINB6,SERPINE2,SERPINB9,RENBP,RPS6KA1,SNCA,SPINT1,TFPI,TP53,VTN,PSMF1,HDAC6,PARK7,ANXA8	23/323
9_Member	GO Biological Processes	GO:0052548	regulation of endopeptidase activity	-7.89713	-5.28894	489,831,1410,1611,1992,2810,2821,3336,4609,4898,5269,5270,5272,5973,6195,6622,7448,10016,11315,23411,29108,56616,653145	ATP2A3,CAST,CRYAB,DAP,SERPINB1,SFN,GPI,HSPE1,MYC,NRDC,SERPINB6,SERPINE2,SERPINB9,RENBP,RPS6KA1,SNCA,VTN,PDCD6,PARK7,SIRT1,PYCARD,DIABLO,ANXA8	23/325
9_Member	GO Biological Processes	GO:0010466	negative regulation of peptidase activity	-7.05053	-4.61578	831,1410,1476,1992,2810,2821,5037,5269,5270,5272,5973,6195,6622,6692,7035,7448,11315,653145	CAST,CRYAB,CSTB,SERPINB1,SFN,GPI,PEBP1,SERPINB6,SERPINE2,SERPINB9,RENBP,RPS6KA1,SNCA,SPINT1,TFPI,VTN,PARK7,ANXA8	18/227
9_Member	GO Biological Processes	GO:0010951	negative regulation of endopeptidase activity	-6.51007	-4.19493	831,1410,1992,2810,2821,5269,5270,5272,5973,6195,6622,7448,11315,653145	CAST,CRYAB,SERPINB1,SFN,GPI,SERPINB6,SERPINE2,SERPINB9,RENBP,RPS6KA1,SNCA,VTN,PARK7,ANXA8	14/149
9_Member	GO Biological Processes	GO:2000117	negative regulation of cysteine-type endopeptidase activity	-3.38143	-1.75797	831,1410,2810,2821,6195,6622,11315	CAST,CRYAB,SFN,GPI,RPS6KA1,SNCA,PARK7	7/79
9_Member	GO Biological Processes	GO:0043154	negative regulation of cysteine-type endopeptidase activity involved in apoptotic process	-3.06466	-1.5182	1410,2810,2821,6195,6622,11315	CRYAB,SFN,GPI,RPS6KA1,SNCA,PARK7	6/65
10_Summary	KEGG Pathway	hsa00620	Pyruvate metabolism	-9.47592	-6.50758	97,98,131,219,2739,3029,3939,4190,4199,5091,5315	ACYP1,ACYP2,ADH7,ALDH1B1,GLO1,HAGH,LDHA,MDH1,ME1,PC,PKM	11/-
10_Member	KEGG Pathway	hsa00620	Pyruvate metabolism	-9.47592	-6.50758	97,98,131,219,2739,3029,3939,4190,4199,5091,5315	ACYP1,ACYP2,ADH7,ALDH1B1,GLO1,HAGH,LDHA,MDH1,ME1,PC,PKM	11/47
10_Member	Reactome Gene Sets	R-HSA-70268	Pyruvate metabolism	-2.73173	-1.2691	2739,3029,3939,4199	GLO1,HAGH,LDHA,ME1	4/31
11_Summary	GO Biological Processes	GO:0030216	keratinocyte differentiation	-9.34302	-6.42148	182,1001,1832,2125,2810,3664,3854,3855,3861,3868,3872,7051,7053,8644,64919,84283,144501,2670,3860,3880,4287,6647,83481,5357,25,231,839,3958,4048,5144,5230,6876,9414,9693,10152,54507,1382,2171,6692,43847,3856,10848,5340,10747,112,3305,6667	JAG1,CDH3,DSP,EVPL,SFN,IRF6,KRT6B,KRT7,KRT14,KRT16,KRT17,TGM1,TGM3,AKR1C3,BCL11B,TMEM79,KRT80,GFAP,KRT13,KRT19,ATXN3,SOD1,EPPK1,PLS1,ABL1,AKR1B1,CASP6,LGALS3,LTA4H,PDE4D,PGK1,TAGLN,TJP2,RAPGEF2,ABI2,ADAMTSL4,CRABP2,FABP5,SPINT1,KLK14,KRT8,PPP1R13L,PLG,MASP2,ADCY6,HSPA1L,SP1	47/-
11_Member	GO Biological Processes	GO:0030216	keratinocyte differentiation	-9.34302	-6.42148	182,1001,1832,2125,2810,3664,3854,3855,3861,3868,3872,7051,7053,8644,64919,84283,144501	JAG1,CDH3,DSP,EVPL,SFN,IRF6,KRT6B,KRT7,KRT14,KRT16,KRT17,TGM1,TGM3,AKR1C3,BCL11B,TMEM79,KRT80	17/143
11_Member	GO Biological Processes	GO:0045104	intermediate filament cytoskeleton organization	-9.23402	-6.34786	1832,2125,2670,3854,3855,3860,3861,3868,3872,3880,4287,6647,83481,144501	DSP,EVPL,GFAP,KRT6B,KRT7,KRT13,KRT14,KRT16,KRT17,KRT19,ATXN3,SOD1,EPPK1,KRT80	14/92
11_Member	GO Biological Processes	GO:0045103	intermediate filament-based process	-9.16995	-6.29851	1832,2125,2670,3854,3855,3860,3861,3868,3872,3880,4287,6647,83481,144501	DSP,EVPL,GFAP,KRT6B,KRT7,KRT13,KRT14,KRT16,KRT17,KRT19,ATXN3,SOD1,EPPK1,KRT80	14/93
11_Member	GO Biological Processes	GO:0009913	epidermal cell differentiation	-8.72914	-5.98265	182,1001,1832,2125,2810,3664,3854,3855,3861,3868,3872,5357,6647,7051,7053,8644,64919,84283,144501	JAG1,CDH3,DSP,EVPL,SFN,IRF6,KRT6B,KRT7,KRT14,KRT16,KRT17,PLS1,SOD1,TGM1,TGM3,AKR1C3,BCL11B,TMEM79,KRT80	19/199
11_Member	GO Biological Processes	GO:0030855	epithelial cell differentiation	-7.92082	-5.30466	25,182,231,839,1001,1832,2125,2810,3664,3854,3855,3860,3861,3868,3872,3880,3958,4048,5144,5230,5357,6647,6876,7051,7053,8644,9414,9693,10152,54507,64919,84283,144501	ABL1,JAG1,AKR1B1,CASP6,CDH3,DSP,EVPL,SFN,IRF6,KRT6B,KRT7,KRT13,KRT14,KRT16,KRT17,KRT19,LGALS3,LTA4H,PDE4D,PGK1,PLS1,SOD1,TAGLN,TGM1,TGM3,AKR1C3,TJP2,RAPGEF2,ABI2,ADAMTSL4,BCL11B,TMEM79,KRT80	33/620
11_Member	GO Biological Processes	GO:0008544	epidermis development	-7.7981	-5.21554	182,1001,1382,1832,2125,2171,2810,3664,3854,3855,3861,3868,3872,5357,6647,6692,7051,7053,8644,43847,64919,84283,144501	JAG1,CDH3,CRABP2,DSP,EVPL,FABP5,SFN,IRF6,KRT6B,KRT7,KRT14,KRT16,KRT17,PLS1,SOD1,SPINT1,TGM1,TGM3,AKR1C3,KLK14,BCL11B,TMEM79,KRT80	23/329
11_Member	GO Biological Processes	GO:0045109	intermediate filament organization	-7.33983	-4.86051	1832,2670,3854,3855,3860,3861,3868,3872,3880,83481,144501	DSP,GFAP,KRT6B,KRT7,KRT13,KRT14,KRT16,KRT17,KRT19,EPPK1,KRT80	11/73
11_Member	GO Biological Processes	GO:0031424	keratinization	-6.8051	-4.44776	1001,2125,2810,3854,3855,3868,3872,7051,7053,84283,144501	CDH3,EVPL,SFN,KRT6B,KRT7,KRT16,KRT17,TGM1,TGM3,TMEM79,KRT80	11/82
11_Member	Reactome Gene Sets	R-HSA-6809371	Formation of the cornified envelope	-6.40093	-4.12426	1832,2125,3854,3855,3856,3860,3861,3868,3872,3880,7051,43847,144501	DSP,EVPL,KRT6B,KRT7,KRT8,KRT13,KRT14,KRT16,KRT17,KRT19,TGM1,KLK14,KRT80	13/130
11_Member	GO Biological Processes	GO:0043588	skin development	-5.20411	-3.1673	182,1001,1832,2125,2810,3664,3854,3855,3861,3868,3872,7051,7053,8644,64919,84283,144501	JAG1,CDH3,DSP,EVPL,SFN,IRF6,KRT6B,KRT7,KRT14,KRT16,KRT17,TGM1,TGM3,AKR1C3,BCL11B,TMEM79,KRT80	17/275
11_Member	Reactome Gene Sets	R-HSA-6805567	Keratinization	-4.02295	-2.23906	1832,2125,3854,3855,3856,3860,3861,3868,3872,3880,7051,43847,144501	DSP,EVPL,KRT6B,KRT7,KRT8,KRT13,KRT14,KRT16,KRT17,KRT19,TGM1,KLK14,KRT80	13/215
11_Member	GO Biological Processes	GO:0042303	molting cycle	-2.92874	-1.40755	1001,3861,3868,3872,7053,10848,84283	CDH3,KRT14,KRT16,KRT17,TGM3,PPP1R13L,TMEM79	7/94
11_Member	GO Biological Processes	GO:0042633	hair cycle	-2.92874	-1.40755	1001,3861,3868,3872,7053,10848,84283	CDH3,KRT14,KRT16,KRT17,TGM3,PPP1R13L,TMEM79	7/94
11_Member	KEGG Pathway	hsa05150	Staphylococcus aureus infection	-2.87529	-1.37121	3860,3861,3868,3872,3880,5340,10747	KRT13,KRT14,KRT16,KRT17,KRT19,PLG,MASP2	7/96
11_Member	KEGG Pathway	hsa04915	Estrogen signaling pathway	-2.57264	-1.15668	112,3305,3860,3861,3868,3872,3880,6667	ADCY6,HSPA1L,KRT13,KRT14,KRT16,KRT17,KRT19,SP1	8/138
11_Member	GO Biological Processes	GO:0048730	epidermis morphogenesis	-2.44478	-1.06377	3872,7053,43847,84283	KRT17,TGM3,KLK14,TMEM79	4/37
12_Summary	WikiPathways	WP3888	VEGFA-VEGFR2 signaling	-9.26507	-6.36367	25,182,213,226,867,1072,1397,1398,1465,1796,2244,2321,2335,2817,3939,4629,4860,5058,5226,5230,5654,5803,7295,7414,8936,9564,10397,51564,83442	ABL1,JAG1,ALB,ALDOA,CBL,CFL1,CRIP2,CRK,CSRP1,DOK1,FGB,FLT1,FN1,GPC1,LDHA,MYH11,PNP,PAK1,PGD,PGK1,HTRA1,PTPRZ1,TXN,VCL,WASF1,BCAR1,NDRG1,HDAC7,SH3BGRL3	29/-
12_Member	WikiPathways	WP3888	VEGFA-VEGFR2 signaling	-9.26507	-6.36367	25,182,213,226,867,1072,1397,1398,1465,1796,2244,2321,2335,2817,3939,4629,4860,5058,5226,5230,5654,5803,7295,7414,8936,9564,10397,51564,83442	ABL1,JAG1,ALB,ALDOA,CBL,CFL1,CRIP2,CRK,CSRP1,DOK1,FGB,FLT1,FN1,GPC1,LDHA,MYH11,PNP,PAK1,PGD,PGK1,HTRA1,PTPRZ1,TXN,VCL,WASF1,BCAR1,NDRG1,HDAC7,SH3BGRL3	29/432
13_Summary	KEGG Pathway	hsa01240	Biosynthesis of cofactors	-8.8831	-6.05632	159,219,1728,2729,2937,3145,4351,4830,4831,4833,5373,7360,29925,29926,51727,79717,93100	ADSS2,ALDH1B1,NQO1,GCLC,GSS,HMBS,MPI,NME1,NME2,NME4,PMM2,UGP2,GMPPB,GMPPA,CMPK1,PPCS,NAPRT	17/-
13_Member	KEGG Pathway	hsa01240	Biosynthesis of cofactors	-8.8831	-6.05632	159,219,1728,2729,2937,3145,4351,4830,4831,4833,5373,7360,29925,29926,51727,79717,93100	ADSS2,ALDH1B1,NQO1,GCLC,GSS,HMBS,MPI,NME1,NME2,NME4,PMM2,UGP2,GMPPB,GMPPA,CMPK1,PPCS,NAPRT	17/153
14_Summary	WikiPathways	WP2882	Nuclear receptors meta-pathway	-8.8734	-6.05632	131,218,1622,1728,2729,2941,2946,2949,3162,4199,4609,5226,5272,5460,5524,6515,6667,7040,7295,7296,10486,10560,57181,114112,213,475,1350,3417,4512,6647,6888,9491,10072,51241,440,1410,3024,3305,4801,6170,6195,7157,7277,7428,10013,10382,10524,23411,4023	ADH7,ALDH3A1,DBI,NQO1,GCLC,GSTA4,GSTM2,GSTM5,HMOX1,ME1,MYC,PGD,SERPINB9,POU5F1,PTPA,SLC2A3,SP1,TGFB1,TXN,TXNRD1,CAP2,SLC19A2,SLC39A10,TXNRD3,ALB,ATOX1,COX7C,IDH1,COX1,SOD1,TALDO1,PSMF1,DPP3,COX16,ASNS,CRYAB,H1-1,HSPA1L,NFYB,RPL39,RPS6KA1,TP53,TUBA4A,VHL,HDAC6,TUBB4A,KAT5,SIRT1,LPL	49/-
14_Member	WikiPathways	WP2882	Nuclear receptors meta-pathway	-8.8734	-6.05632	131,218,1622,1728,2729,2941,2946,2949,3162,4199,4609,5226,5272,5460,5524,6515,6667,7040,7295,7296,10486,10560,57181,114112	ADH7,ALDH3A1,DBI,NQO1,GCLC,GSTA4,GSTM2,GSTM5,HMOX1,ME1,MYC,PGD,SERPINB9,POU5F1,PTPA,SLC2A3,SP1,TGFB1,TXN,TXNRD1,CAP2,SLC19A2,SLC39A10,TXNRD3	24/314
14_Member	WikiPathways	WP2884	NRF2 pathway	-8.53164	-5.80633	131,218,1728,2729,2941,2946,2949,3162,4199,5226,6515,7040,7295,7296,57181,114112	ADH7,ALDH3A1,NQO1,GCLC,GSTA4,GSTM2,GSTM5,HMOX1,ME1,PGD,SLC2A3,TGFB1,TXN,TXNRD1,SLC39A10,TXNRD3	16/141
14_Member	Reactome Gene Sets	R-HSA-9711123	Cellular response to chemical stress	-7.93194	-5.30765	213,475,1350,1728,2729,3162,3417,4199,4512,4609,5226,6647,6888,7295,7296,9491,10072,51241	ALB,ATOX1,COX7C,NQO1,GCLC,HMOX1,IDH1,ME1,COX1,MYC,PGD,SOD1,TALDO1,TXN,TXNRD1,PSMF1,DPP3,COX16	18/199
14_Member	Reactome Gene Sets	R-HSA-9759194	Nuclear events mediated by NFE2L2	-6.00143	-3.78959	1728,2729,3162,3417,4199,4609,5226,6888,7296,9491	NQO1,GCLC,HMOX1,IDH1,ME1,MYC,PGD,TALDO1,TXNRD1,PSMF1	10/79
14_Member	Reactome Gene Sets	R-HSA-9755511	KEAP1-NFE2L2 pathway	-5.6271	-3.50126	1728,2729,3162,3417,4199,4609,5226,6888,7296,9491,10072	NQO1,GCLC,HMOX1,IDH1,ME1,MYC,PGD,TALDO1,TXNRD1,PSMF1,DPP3	11/107
14_Member	Reactome Gene Sets	R-HSA-2262752	Cellular responses to stress	-5.55837	-3.45037	213,440,475,1350,1410,1728,2729,3024,3162,3305,3417,4199,4512,4609,4801,5226,6170,6195,6647,6667,6888,7157,7277,7295,7296,7428,9491,10013,10072,10382,10524,23411,51241	ALB,ASNS,ATOX1,COX7C,CRYAB,NQO1,GCLC,H1-1,HMOX1,HSPA1L,IDH1,ME1,COX1,MYC,NFYB,PGD,RPL39,RPS6KA1,SOD1,SP1,TALDO1,TP53,TUBA4A,TXN,TXNRD1,VHL,PSMF1,HDAC6,DPP3,TUBB4A,KAT5,SIRT1,COX16	33/788
14_Member	WikiPathways	WP408	Oxidative stress response	-4.73668	-2.79806	1728,2729,3162,6647,6667,7296	NQO1,GCLC,HMOX1,SOD1,SP1,TXNRD1	6/33
14_Member	Reactome Gene Sets	R-HSA-9818027	NFE2L2 regulating anti-oxidant/detoxification enzymes	-3.77066	-2.0499	1728,2729,3162,7296	NQO1,GCLC,HMOX1,TXNRD1	4/17
14_Member	GO Biological Processes	GO:0045454	cell redox homeostasis	-3.23654	-1.65103	1728,2729,7295,7296,114112	NQO1,GCLC,TXN,TXNRD1,TXNRD3	5/40
14_Member	WikiPathways	WP3	Transcriptional activation by NRF2 in response to phytochemicals	-2.71007	-1.26079	1728,2729,3162	NQO1,GCLC,HMOX1	3/15
14_Member	WikiPathways	WP3612	Photodynamic therapy-induced NFE2L2 (NRF2) survival signaling	-2.16393	-0.862258	1728,2729,3162	NQO1,GCLC,HMOX1	3/23
14_Member	WikiPathways	WP4357	NRF2-ARE regulation	-2.16393	-0.862258	1728,2729,3162	NQO1,GCLC,HMOX1	3/23
14_Member	WikiPathways	WP2586	Aryl hydrocarbon receptor pathway	-2.1043	-0.818327	1728,2729,4023,4609	NQO1,GCLC,LPL,MYC	4/46
15_Summary	GO Biological Processes	GO:0010035	response to inorganic substance	-8.83109	-6.05073	25,100,159,999,1396,1398,1410,1728,2244,2395,2664,2729,2821,2937,3162,3613,3856,4048,4502,4512,6415,6622,6647,7157,7295,8644,10013,10016,10156,10397,11315,23411	ABL1,ADA,ADSS2,CDH1,CRIP1,CRK,CRYAB,NQO1,FGB,FXN,GDI1,GCLC,GPI,GSS,HMOX1,IMPA2,KRT8,LTA4H,MT2A,COX1,SELENOW,SNCA,SOD1,TP53,TXN,AKR1C3,HDAC6,PDCD6,RASA4,NDRG1,PARK7,SIRT1	32/-
15_Member	GO Biological Processes	GO:0010035	response to inorganic substance	-8.83109	-6.05073	25,100,159,999,1396,1398,1410,1728,2244,2395,2664,2729,2821,2937,3162,3613,3856,4048,4502,4512,6415,6622,6647,7157,7295,8644,10013,10016,10156,10397,11315,23411	ABL1,ADA,ADSS2,CDH1,CRIP1,CRK,CRYAB,NQO1,FGB,FXN,GDI1,GCLC,GPI,GSS,HMOX1,IMPA2,KRT8,LTA4H,MT2A,COX1,SELENOW,SNCA,SOD1,TP53,TXN,AKR1C3,HDAC6,PDCD6,RASA4,NDRG1,PARK7,SIRT1	32/539
15_Member	GO Biological Processes	GO:0010038	response to metal ion	-5.70852	-3.56409	999,1396,1728,2244,2395,2664,2729,2821,2937,3162,3613,4048,4502,4512,6622,6647,8644,10016,10156,10397,11315	CDH1,CRIP1,NQO1,FGB,FXN,GDI1,GCLC,GPI,GSS,HMOX1,IMPA2,LTA4H,MT2A,COX1,SNCA,SOD1,AKR1C3,PDCD6,RASA4,NDRG1,PARK7	21/369
16_Summary	Reactome Gene Sets	R-HSA-1474244	Extracellular matrix organization	-8.5546	-5.81882	831,999,1756,2192,2199,2244,2335,3339,3676,3912,4052,4811,5340,5654,7040,7448,11117,22795,22801,26577,30008,85007,375790,10631,51232,64856,115908,255743,2620,2670,4629,6692,7051,7053,54507,25,182,1398,4287,7414,27,100,941,4860,10524,29108	CAST,CDH1,DMD,FBLN1,FBLN2,FGB,FN1,HSPG2,ITGA4,LAMB1,LTBP1,NID1,PLG,HTRA1,TGFB1,VTN,EMILIN1,NID2,ITGA11,PCOLCE2,EFEMP2,PHYKPL,AGRN,POSTN,CRIM1,VWA1,CTHRC1,NPNT,GAS2,GFAP,MYH11,SPINT1,TGM1,TGM3,ADAMTSL4,ABL1,JAG1,CRK,ATXN3,VCL,ABL2,ADA,CD80,PNP,KAT5,PYCARD	46/-
16_Member	Reactome Gene Sets	R-HSA-1474244	Extracellular matrix organization	-8.5546	-5.81882	831,999,1756,2192,2199,2244,2335,3339,3676,3912,4052,4811,5340,5654,7040,7448,11117,22795,22801,26577,30008,85007,375790	CAST,CDH1,DMD,FBLN1,FBLN2,FGB,FN1,HSPG2,ITGA4,LAMB1,LTBP1,NID1,PLG,HTRA1,TGFB1,VTN,EMILIN1,NID2,ITGA11,PCOLCE2,EFEMP2,PHYKPL,AGRN	23/300
16_Member	Canonical Pathways	M3008	NABA ECM GLYCOPROTEINS	-8.03561	-5.37725	2192,2199,2244,2335,3912,4052,4811,7448,10631,11117,22795,26577,30008,51232,64856,115908,255743,375790	FBLN1,FBLN2,FGB,FN1,LAMB1,LTBP1,NID1,VTN,POSTN,EMILIN1,NID2,PCOLCE2,EFEMP2,CRIM1,VWA1,CTHRC1,NPNT,AGRN	18/196
16_Member	Reactome Gene Sets	R-HSA-2129379	Molecules associated with elastic fibres	-6.7568	-4.40388	2192,2199,2335,4052,7040,7448,11117,30008	FBLN1,FBLN2,FN1,LTBP1,TGFB1,VTN,EMILIN1,EFEMP2	8/37
16_Member	Canonical Pathways	M5884	NABA CORE MATRISOME	-6.47096	-4.1638	2192,2199,2244,2335,3339,3912,4052,4811,7448,10631,11117,22795,26577,30008,51232,64856,115908,255743,375790	FBLN1,FBLN2,FGB,FN1,HSPG2,LAMB1,LTBP1,NID1,VTN,POSTN,EMILIN1,NID2,PCOLCE2,EFEMP2,CRIM1,VWA1,CTHRC1,NPNT,AGRN	19/275
16_Member	Reactome Gene Sets	R-HSA-1566948	Elastic fibre formation	-6.14061	-3.91263	2192,2199,2335,4052,7040,7448,11117,30008	FBLN1,FBLN2,FN1,LTBP1,TGFB1,VTN,EMILIN1,EFEMP2	8/44
16_Member	GO Biological Processes	GO:0045229	external encapsulating structure organization	-5.82493	-3.65246	2192,2620,2670,4629,4811,5340,6692,7040,7051,7053,7448,10631,11117,22795,30008,54507,64856,255743	FBLN1,GAS2,GFAP,MYH11,NID1,PLG,SPINT1,TGFB1,TGM1,TGM3,VTN,POSTN,EMILIN1,NID2,EFEMP2,ADAMTSL4,VWA1,NPNT	18/275
16_Member	GO Biological Processes	GO:0010810	regulation of cell-substrate adhesion	-5.12087	-3.10475	25,182,1398,2192,2199,2244,2335,4287,4811,5340,7414,7448,11117,30008,255743	ABL1,JAG1,CRK,FBLN1,FBLN2,FGB,FN1,ATXN3,NID1,PLG,VCL,VTN,EMILIN1,EFEMP2,NPNT	15/222
16_Member	GO Biological Processes	GO:0030198	extracellular matrix organization	-4.66774	-2.75054	2192,2620,2670,4629,4811,5340,6692,7040,7448,10631,11117,22795,30008,54507,64856,255743	FBLN1,GAS2,GFAP,MYH11,NID1,PLG,SPINT1,TGFB1,VTN,POSTN,EMILIN1,NID2,EFEMP2,ADAMTSL4,VWA1,NPNT	16/272
16_Member	GO Biological Processes	GO:0043062	extracellular structure organization	-4.64828	-2.73429	2192,2620,2670,4629,4811,5340,6692,7040,7448,10631,11117,22795,30008,54507,64856,255743	FBLN1,GAS2,GFAP,MYH11,NID1,PLG,SPINT1,TGFB1,VTN,POSTN,EMILIN1,NID2,EFEMP2,ADAMTSL4,VWA1,NPNT	16/273
16_Member	GO Biological Processes	GO:0010811	positive regulation of cell-substrate adhesion	-4.2154	-2.39447	25,1398,2199,2244,2335,4811,7448,11117,30008,255743	ABL1,CRK,FBLN2,FGB,FN1,NID1,VTN,EMILIN1,EFEMP2,NPNT	10/125
16_Member	GO Biological Processes	GO:0045785	positive regulation of cell adhesion	-2.73531	-1.26985	25,27,100,941,1398,2199,2244,2335,3676,3912,4811,4860,7448,10524,11117,29108,30008,255743	ABL1,ABL2,ADA,CD80,CRK,FBLN2,FGB,FN1,ITGA4,LAMB1,NID1,PNP,VTN,KAT5,EMILIN1,PYCARD,EFEMP2,NPNT	18/482
17_Summary	GO Biological Processes	GO:0042060	wound healing	-8.34318	-5.63807	1001,1465,1832,2125,2147,2153,2162,2192,2244,2335,3162,5058,5270,5340,5341,5627,7035,7040,7414,8525,83481,92421,646960,653145,100,112,231,362,2821,4830,7448,11117,114897,2670,5460,6647,1398,65078,213,1491,6415,7295,7296,114112,10747,199731,1540,1652,4282,5272,5654,9212,10013,59307,345611,3912,7157,1997	CDH3,CSRP1,DSP,EVPL,F2,F5,F13A1,FBLN1,FGB,FN1,HMOX1,PAK1,SERPINE2,PLG,PLEK,PROS1,TFPI,TGFB1,VCL,DGKZ,EPPK1,CHMP4C,PRSS56,ANXA8,ADA,ADCY6,AKR1B1,AQP5,GPI,NME1,VTN,EMILIN1,C1QTNF1,GFAP,POU5F1,SOD1,CRK,RTN4R,ALB,CTH,SELENOW,TXN,TXNRD1,TXNRD3,MASP2,CADM4,CYLD,DDT,MIF,SERPINB9,HTRA1,AURKB,HDAC6,SIGIRR,IRGM,LAMB1,TP53,ELF1	58/-
17_Member	GO Biological Processes	GO:0042060	wound healing	-8.34318	-5.63807	1001,1465,1832,2125,2147,2153,2162,2192,2244,2335,3162,5058,5270,5340,5341,5627,7035,7040,7414,8525,83481,92421,646960,653145	CDH3,CSRP1,DSP,EVPL,F2,F5,F13A1,FBLN1,FGB,FN1,HMOX1,PAK1,SERPINE2,PLG,PLEK,PROS1,TFPI,TGFB1,VCL,DGKZ,EPPK1,CHMP4C,PRSS56,ANXA8	24/334
17_Member	GO Biological Processes	GO:0050878	regulation of body fluid levels	-7.97216	-5.33117	100,112,231,362,1465,2147,2153,2162,2192,2244,2821,4830,5270,5340,5341,5627,7035,7414,7448,8525,11117,114897,646960,653145	ADA,ADCY6,AKR1B1,AQP5,CSRP1,F2,F5,F13A1,FBLN1,FGB,GPI,NME1,SERPINE2,PLG,PLEK,PROS1,TFPI,VCL,VTN,DGKZ,EMILIN1,C1QTNF1,PRSS56,ANXA8	24/349
17_Member	GO Biological Processes	GO:0009611	response to wounding	-7.59684	-5.0501	1001,1465,1832,2125,2147,2153,2162,2192,2244,2335,2670,3162,5058,5270,5340,5341,5460,5627,6647,7035,7040,7414,8525,83481,92421,646960,653145	CDH3,CSRP1,DSP,EVPL,F2,F5,F13A1,FBLN1,FGB,FN1,GFAP,HMOX1,PAK1,SERPINE2,PLG,PLEK,POU5F1,PROS1,SOD1,TFPI,TGFB1,VCL,DGKZ,EPPK1,CHMP4C,PRSS56,ANXA8	27/452
17_Member	GO Biological Processes	GO:0007599	hemostasis	-7.01466	-4.59552	1465,2147,2153,2162,2192,2244,2821,5270,5340,5341,5627,7035,7414,8525,646960,653145	CSRP1,F2,F5,F13A1,FBLN1,FGB,GPI,SERPINE2,PLG,PLEK,PROS1,TFPI,VCL,DGKZ,PRSS56,ANXA8	16/180
17_Member	GO Biological Processes	GO:0007596	blood coagulation	-6.44239	-4.15829	1465,2147,2153,2162,2192,2244,5270,5340,5341,5627,7035,7414,8525,646960,653145	CSRP1,F2,F5,F13A1,FBLN1,FGB,SERPINE2,PLG,PLEK,PROS1,TFPI,VCL,DGKZ,PRSS56,ANXA8	15/174
17_Member	GO Biological Processes	GO:0050817	coagulation	-6.37835	-4.10779	1465,2147,2153,2162,2192,2244,5270,5340,5341,5627,7035,7414,8525,646960,653145	CSRP1,F2,F5,F13A1,FBLN1,FGB,SERPINE2,PLG,PLEK,PROS1,TFPI,VCL,DGKZ,PRSS56,ANXA8	15/176
17_Member	GO Biological Processes	GO:0061045	negative regulation of wound healing	-6.32686	-4.0682	1398,2147,2244,5270,5340,5627,7035,7448,83481,114897	CRK,F2,FGB,SERPINE2,PLG,PROS1,TFPI,VTN,EPPK1,C1QTNF1	10/73
17_Member	GO Biological Processes	GO:1903035	negative regulation of response to wounding	-6.23974	-3.9984	1398,2147,2244,5270,5340,5627,7035,7448,65078,83481,114897	CRK,F2,FGB,SERPINE2,PLG,PROS1,TFPI,VTN,RTN4R,EPPK1,C1QTNF1	11/93
17_Member	GO Biological Processes	GO:0030195	negative regulation of blood coagulation	-6.06212	-3.8439	2147,2244,5270,5340,5627,7035,7448,114897	F2,FGB,SERPINE2,PLG,PROS1,TFPI,VTN,C1QTNF1	8/45
17_Member	GO Biological Processes	GO:1900047	negative regulation of hemostasis	-5.98567	-3.77699	2147,2244,5270,5340,5627,7035,7448,114897	F2,FGB,SERPINE2,PLG,PROS1,TFPI,VTN,C1QTNF1	8/46
17_Member	Reactome Gene Sets	R-HSA-140875	Common Pathway of Fibrin Clot Formation	-5.83882	-3.66019	2147,2153,2162,2244,5270,5627	F2,F5,F13A1,FGB,SERPINE2,PROS1	6/22
17_Member	GO Biological Processes	GO:0050819	negative regulation of coagulation	-5.76759	-3.60656	2147,2244,5270,5340,5627,7035,7448,114897	F2,FGB,SERPINE2,PLG,PROS1,TFPI,VTN,C1QTNF1	8/49
17_Member	WikiPathways	WP15	Selenium micronutrient network	-5.6573	-3.52277	213,1491,2147,2244,5340,6415,6647,7295,7296,114112	ALB,CTH,F2,FGB,PLG,SELENOW,SOD1,TXN,TXNRD1,TXNRD3	10/86
17_Member	KEGG Pathway	hsa04610	Complement and coagulation cascades	-5.6573	-3.52277	2147,2153,2162,2244,5270,5340,5627,7035,7448,10747	F2,F5,F13A1,FGB,SERPINE2,PLG,PROS1,TFPI,VTN,MASP2	10/86
17_Member	GO Biological Processes	GO:0030193	regulation of blood coagulation	-5.56951	-3.45682	2147,2244,5270,5340,5627,7035,7448,11117,114897	F2,FGB,SERPINE2,PLG,PROS1,TFPI,VTN,EMILIN1,C1QTNF1	9/69
17_Member	WikiPathways	WP4927	COVID-19, thrombosis and anticoagulation	-5.54395	-3.44091	2147,2162,2244,5340	F2,F13A1,FGB,PLG	4/7
17_Member	GO Biological Processes	GO:1900046	regulation of hemostasis	-5.46402	-3.37314	2147,2244,5270,5340,5627,7035,7448,11117,114897	F2,FGB,SERPINE2,PLG,PROS1,TFPI,VTN,EMILIN1,C1QTNF1	9/71
17_Member	Reactome Gene Sets	R-HSA-140877	Formation of Fibrin Clot (Clotting Cascade)	-5.40091	-3.32283	2147,2153,2162,2244,5270,5627,7035	F2,F5,F13A1,FGB,SERPINE2,PROS1,TFPI	7/39
17_Member	GO Biological Processes	GO:0061041	regulation of wound healing	-5.38015	-3.30575	1398,2147,2244,5270,5340,5627,7035,7448,11117,83481,114897,199731	CRK,F2,FGB,SERPINE2,PLG,PROS1,TFPI,VTN,EMILIN1,EPPK1,C1QTNF1,CADM4	12/136
17_Member	GO Biological Processes	GO:0050818	regulation of coagulation	-5.31228	-3.25819	2147,2244,5270,5340,5627,7035,7448,11117,114897	F2,FGB,SERPINE2,PLG,PROS1,TFPI,VTN,EMILIN1,C1QTNF1	9/74
17_Member	GO Biological Processes	GO:0032102	negative regulation of response to external stimulus	-5.17338	-3.14497	100,1398,1540,1652,2147,2244,4282,5270,5272,5340,5627,5654,6647,7035,7040,7448,9212,10013,59307,65078,83481,114897,345611	ADA,CRK,CYLD,DDT,F2,FGB,MIF,SERPINE2,SERPINB9,PLG,PROS1,HTRA1,SOD1,TFPI,TGFB1,VTN,AURKB,HDAC6,SIGIRR,RTN4R,EPPK1,C1QTNF1,IRGM	23/465
17_Member	GO Biological Processes	GO:1903034	regulation of response to wounding	-5.00836	-3.01005	1398,2147,2244,5270,5340,5627,7035,7448,11117,65078,83481,114897,199731	CRK,F2,FGB,SERPINE2,PLG,PROS1,TFPI,VTN,EMILIN1,RTN4R,EPPK1,C1QTNF1,CADM4	13/173
17_Member	WikiPathways	WP2806	Complement system	-4.35152	-2.4999	213,2162,2244,3912,5340,5627,7295,7448,10747	ALB,F13A1,FGB,LAMB1,PLG,PROS1,TXN,VTN,MASP2	9/97
17_Member	WikiPathways	WP558	Complement and coagulation cascades	-4.23159	-2.40808	2147,2153,2244,5340,5627,7035,10747	F2,F5,FGB,PLG,PROS1,TFPI,MASP2	7/58
17_Member	WikiPathways	WP176	Folate metabolism	-3.74697	-2.03389	213,1491,2147,2244,5340,6647,7157	ALB,CTH,F2,FGB,PLG,SOD1,TP53	7/69
17_Member	Canonical Pathways	M92	PID ANGIOPOIETIN RECEPTOR PATHWAY	-3.73598	-2.02591	1398,1997,2147,2335,5058,5340	CRK,ELF1,F2,FN1,PAK1,PLG	6/49
17_Member	GO Biological Processes	GO:0042730	fibrinolysis	-3.57065	-1.90705	2147,2244,5340,5627	F2,FGB,PLG,PROS1	4/19
17_Member	WikiPathways	WP272	Blood clotting cascade	-3.3125	-1.7043	2147,2153,2244,5340	F2,F5,FGB,PLG	4/22
17_Member	GO Biological Processes	GO:0030194	positive regulation of blood coagulation	-2.90075	-1.39345	2147,5340,7448,11117	F2,PLG,VTN,EMILIN1	4/28
17_Member	GO Biological Processes	GO:1900048	positive regulation of hemostasis	-2.90075	-1.39345	2147,5340,7448,11117	F2,PLG,VTN,EMILIN1	4/28
17_Member	GO Biological Processes	GO:0051918	negative regulation of fibrinolysis	-2.90065	-1.39345	2147,5340,7448	F2,PLG,VTN	3/13
17_Member	GO Biological Processes	GO:0050820	positive regulation of coagulation	-2.78587	-1.31179	2147,5340,7448,11117	F2,PLG,VTN,EMILIN1	4/30
17_Member	WikiPathways	WP1533	Vitamin B12 metabolism	-2.75079	-1.28304	213,1491,2147,5340,6647	ALB,CTH,F2,PLG,SOD1	5/51
17_Member	Canonical Pathways	M165	PID SYNDECAN 4 PATHWAY	-2.67959	-1.23575	2147,2335,5340,7035	F2,FN1,PLG,TFPI	4/32
17_Member	GO Biological Processes	GO:0051917	regulation of fibrinolysis	-2.47296	-1.08629	2147,5340,7448	F2,PLG,VTN	3/18
18_Summary	Reactome Gene Sets	R-HSA-9716542	Signaling by Rho GTPases, Miro GTPases and RHOBTB3	-7.85767	-5.2573	25,27,182,396,397,999,1072,1152,1832,1857,2810,3336,4629,5058,5063,5217,7074,7277,7428,8936,9212,9414,10152,10382,10552,10652,11075,23048,26286,27237,30851,54874,55831,57449,90627,147179	ABL1,ABL2,JAG1,ARHGDIA,ARHGDIB,CDH1,CFL1,CKB,DSP,DVL3,SFN,HSPE1,MYH11,PAK1,PAK3,PFN2,TIAM1,TUBA4A,VHL,WASF1,AURKB,TJP2,ABI2,TUBB4A,ARPC1A,YKT6,STMN2,FNBP1,ARFGAP3,ARHGEF16,TAX1BP3,FNBP1L,EMC3,PLEKHG5,STARD13,WIPF2	36/-
18_Member	Reactome Gene Sets	R-HSA-9716542	Signaling by Rho GTPases, Miro GTPases and RHOBTB3	-7.85767	-5.2573	25,27,182,396,397,999,1072,1152,1832,1857,2810,3336,4629,5058,5063,5217,7074,7277,7428,8936,9212,9414,10152,10382,10552,10652,11075,23048,26286,27237,30851,54874,55831,57449,90627,147179	ABL1,ABL2,JAG1,ARHGDIA,ARHGDIB,CDH1,CFL1,CKB,DSP,DVL3,SFN,HSPE1,MYH11,PAK1,PAK3,PFN2,TIAM1,TUBA4A,VHL,WASF1,AURKB,TJP2,ABI2,TUBB4A,ARPC1A,YKT6,STMN2,FNBP1,ARFGAP3,ARHGEF16,TAX1BP3,FNBP1L,EMC3,PLEKHG5,STARD13,WIPF2	36/722
18_Member	Reactome Gene Sets	R-HSA-194315	Signaling by Rho GTPases	-7.59248	-5.0501	25,27,182,396,397,999,1072,1152,1832,1857,2810,3336,4629,5058,5063,5217,7074,7277,8936,9212,9414,10152,10382,10552,10652,11075,23048,26286,27237,30851,54874,55831,57449,90627,147179	ABL1,ABL2,JAG1,ARHGDIA,ARHGDIB,CDH1,CFL1,CKB,DSP,DVL3,SFN,HSPE1,MYH11,PAK1,PAK3,PFN2,TIAM1,TUBA4A,WASF1,AURKB,TJP2,ABI2,TUBB4A,ARPC1A,YKT6,STMN2,FNBP1,ARFGAP3,ARHGEF16,TAX1BP3,FNBP1L,EMC3,PLEKHG5,STARD13,WIPF2	35/706
18_Member	Reactome Gene Sets	R-HSA-9012999	RHO GTPase cycle	-5.4222	-3.34082	27,182,396,397,1152,1832,3336,5058,5063,7074,8936,9414,10152,10652,11075,23048,26286,27237,54874,55831,57449,90627,147179	ABL2,JAG1,ARHGDIA,ARHGDIB,CKB,DSP,HSPE1,PAK1,PAK3,TIAM1,WASF1,TJP2,ABI2,YKT6,STMN2,FNBP1,ARFGAP3,ARHGEF16,FNBP1L,EMC3,PLEKHG5,STARD13,WIPF2	23/449
18_Member	Reactome Gene Sets	R-HSA-9013148	CDC42 GTPase cycle	-4.7985	-2.83196	396,397,5058,5063,7074,10652,23048,26286,27237,54874,90627,147179	ARHGDIA,ARHGDIB,PAK1,PAK3,TIAM1,YKT6,FNBP1,ARFGAP3,ARHGEF16,FNBP1L,STARD13,WIPF2	12/155
18_Member	Reactome Gene Sets	R-HSA-195258	RHO GTPase Effectors	-4.25943	-2.42542	25,999,1072,1857,2810,4629,5058,5063,5217,7277,8936,9212,10152,10382,10552,30851,147179	ABL1,CDH1,CFL1,DVL3,SFN,MYH11,PAK1,PAK3,PFN2,TUBA4A,WASF1,AURKB,ABI2,TUBB4A,ARPC1A,TAX1BP3,WIPF2	17/326
18_Member	Reactome Gene Sets	R-HSA-9013409	RHOJ GTPase cycle	-2.6045	-1.18229	5058,5063,23048,54874,147179	PAK1,PAK3,FNBP1,FNBP1L,WIPF2	5/55
19_Summary	GO Biological Processes	GO:1902903	regulation of supramolecular fiber organization	-7.84998	-5.25729	25,1073,1410,4130,5058,5063,5217,5341,6622,8936,10013,10152,10382,10677,11075,11117,11315,11344,24139,25802,29108,30008,54961,58497,348110,112,999,2395,2664,2665,2670,2729,3958,4134,5494,7040,7157,9693,10857,56896,56984,57609,65078,146691,162979,345611,51673,27,396,397,1398,1540,4135,92421,1832,5144,58527,23242,26499,54874,64787,375790,7320,9212,10524,25793,93974	ABL1,CFL2,CRYAB,MAP1A,PAK1,PAK3,PFN2,PLEK,SNCA,WASF1,HDAC6,ABI2,TUBB4A,AVIL,STMN2,EMILIN1,PARK7,TWF2,EML2,LMOD1,PYCARD,EFEMP2,SSH3,PRUNE1,ARPIN,ADCY6,CDH1,FXN,GDI1,GDI2,GFAP,GCLC,LGALS3,MAP4,PPM1A,TGFB1,TP53,RAPGEF2,PGRMC1,DPYSL5,PSMG2,DIP2B,RTN4R,TOM1L2,ZNF296,IRGM,TPPP3,ABL2,ARHGDIA,ARHGDIB,CRK,CYLD,MAP6,CHMP4C,DSP,PDE4D,ABRACL,COBL,PLEK2,FNBP1L,EPS8L2,AGRN,UBE2B,AURKB,KAT5,FBXO7,ATP5IF1	67/-
19_Member	GO Biological Processes	GO:1902903	regulation of supramolecular fiber organization	-7.84998	-5.25729	25,1073,1410,4130,5058,5063,5217,5341,6622,8936,10013,10152,10382,10677,11075,11117,11315,11344,24139,25802,29108,30008,54961,58497,348110	ABL1,CFL2,CRYAB,MAP1A,PAK1,PAK3,PFN2,PLEK,SNCA,WASF1,HDAC6,ABI2,TUBB4A,AVIL,STMN2,EMILIN1,PARK7,TWF2,EML2,LMOD1,PYCARD,EFEMP2,SSH3,PRUNE1,ARPIN	25/382
19_Member	GO Biological Processes	GO:0051129	negative regulation of cellular component organization	-7.36814	-4.88291	112,999,1410,2395,2664,2665,2670,2729,3958,4134,5217,5494,6622,7040,7157,9693,10013,10382,10677,10857,11075,11117,11315,11344,24139,25802,54961,56896,56984,57609,65078,146691,162979,345611,348110	ADCY6,CDH1,CRYAB,FXN,GDI1,GDI2,GFAP,GCLC,LGALS3,MAP4,PFN2,PPM1A,SNCA,TGFB1,TP53,RAPGEF2,HDAC6,TUBB4A,AVIL,PGRMC1,STMN2,EMILIN1,PARK7,TWF2,EML2,LMOD1,SSH3,DPYSL5,PSMG2,DIP2B,RTN4R,TOM1L2,ZNF296,IRGM,ARPIN	35/721
19_Member	GO Biological Processes	GO:0043254	regulation of protein-containing complex assembly	-7.14881	-4.70874	25,1410,2670,3958,5058,5063,5217,5341,5494,6622,7040,7157,10013,10382,10677,11075,11315,11344,24139,25802,29108,51673,54961,58497,345611	ABL1,CRYAB,GFAP,LGALS3,PAK1,PAK3,PFN2,PLEK,PPM1A,SNCA,TGFB1,TP53,HDAC6,TUBB4A,AVIL,STMN2,PARK7,TWF2,EML2,LMOD1,PYCARD,TPPP3,SSH3,PRUNE1,IRGM	25/415
19_Member	GO Biological Processes	GO:0051493	regulation of cytoskeleton organization	-6.92802	-4.5385	25,27,396,397,1073,1398,1540,4130,4135,5058,5063,5217,5341,6622,8936,10013,10152,10382,10677,11075,11344,24139,25802,29108,54961,58497,92421,348110	ABL1,ABL2,ARHGDIA,ARHGDIB,CFL2,CRK,CYLD,MAP1A,MAP6,PAK1,PAK3,PFN2,PLEK,SNCA,WASF1,HDAC6,ABI2,TUBB4A,AVIL,STMN2,TWF2,EML2,LMOD1,PYCARD,SSH3,PRUNE1,CHMP4C,ARPIN	28/519
19_Member	GO Biological Processes	GO:0031333	negative regulation of protein-containing complex assembly	-6.58255	-4.25929	1410,5217,5494,6622,10013,10382,10677,11075,11315,11344,24139,25802,54961,345611	CRYAB,PFN2,PPM1A,SNCA,HDAC6,TUBB4A,AVIL,STMN2,PARK7,TWF2,EML2,LMOD1,SSH3,IRGM	14/147
19_Member	GO Biological Processes	GO:0032271	regulation of protein polymerization	-5.75726	-3.60183	25,5058,5063,5217,6622,10382,10677,11075,11344,24139,25802,29108,51673,54961,58497	ABL1,PAK1,PAK3,PFN2,SNCA,TUBB4A,AVIL,STMN2,TWF2,EML2,LMOD1,PYCARD,TPPP3,SSH3,PRUNE1	15/197
19_Member	GO Biological Processes	GO:0032970	regulation of actin filament-based process	-5.36805	-3.29825	25,27,396,397,1073,1398,1832,5058,5063,5144,5217,5341,8936,10152,10677,11344,25802,29108,54961,58527,348110	ABL1,ABL2,ARHGDIA,ARHGDIB,CFL2,CRK,DSP,PAK1,PAK3,PDE4D,PFN2,PLEK,WASF1,ABI2,AVIL,TWF2,LMOD1,PYCARD,SSH3,ABRACL,ARPIN	21/388
19_Member	GO Biological Processes	GO:1902904	negative regulation of supramolecular fiber organization	-5.28995	-3.24024	1410,5217,6622,10013,10382,10677,11075,11117,11344,24139,25802,54961,348110	CRYAB,PFN2,SNCA,HDAC6,TUBB4A,AVIL,STMN2,EMILIN1,TWF2,EML2,LMOD1,SSH3,ARPIN	13/163
19_Member	GO Biological Processes	GO:0032272	negative regulation of protein polymerization	-5.21517	-3.17624	5217,6622,10382,10677,11075,11344,24139,25802,54961	PFN2,SNCA,TUBB4A,AVIL,STMN2,TWF2,EML2,LMOD1,SSH3	9/76
19_Member	GO Biological Processes	GO:0010639	negative regulation of organelle organization	-4.54411	-2.65795	2395,2665,2729,4134,5217,6622,7157,10013,10382,10677,11075,11344,24139,25802,54961,56984,146691,348110	FXN,GDI2,GCLC,MAP4,PFN2,SNCA,TP53,HDAC6,TUBB4A,AVIL,STMN2,TWF2,EML2,LMOD1,SSH3,PSMG2,TOM1L2,ARPIN	18/341
19_Member	GO Biological Processes	GO:0032956	regulation of actin cytoskeleton organization	-4.44507	-2.57795	25,27,396,397,1073,1398,5058,5063,5217,5341,8936,10152,10677,11344,25802,29108,54961,348110	ABL1,ABL2,ARHGDIA,ARHGDIB,CFL2,CRK,PAK1,PAK3,PFN2,PLEK,WASF1,ABI2,AVIL,TWF2,LMOD1,PYCARD,SSH3,ARPIN	18/347
19_Member	GO Biological Processes	GO:0051494	negative regulation of cytoskeleton organization	-4.00347	-2.22807	5217,6622,10013,10382,10677,11075,11344,24139,25802,54961,348110	PFN2,SNCA,HDAC6,TUBB4A,AVIL,STMN2,TWF2,EML2,LMOD1,SSH3,ARPIN	11/159
19_Member	GO Biological Processes	GO:1901879	regulation of protein depolymerization	-3.93719	-2.17746	1073,4130,5341,10013,10677,11075,11344,25802	CFL2,MAP1A,PLEK,HDAC6,AVIL,STMN2,TWF2,LMOD1	8/86
19_Member	GO Biological Processes	GO:0044089	positive regulation of cellular component biogenesis	-3.69548	-1.99626	25,3958,5058,5217,5341,6622,7040,7157,10152,10677,11117,11315,11344,23242,25802,26499,29108,51673,54874,64787,375790	ABL1,LGALS3,PAK1,PFN2,PLEK,SNCA,TGFB1,TP53,ABI2,AVIL,EMILIN1,PARK7,TWF2,COBL,LMOD1,PLEK2,PYCARD,TPPP3,FNBP1L,EPS8L2,AGRN	21/506
19_Member	GO Biological Processes	GO:1902905	positive regulation of supramolecular fiber organization	-3.63704	-1.95181	25,1073,5058,5217,5341,8936,10152,11075,25802,29108,30008	ABL1,CFL2,PAK1,PFN2,PLEK,WASF1,ABI2,STMN2,LMOD1,PYCARD,EFEMP2	11/175
19_Member	GO Biological Processes	GO:0043244	regulation of protein-containing complex disassembly	-3.5572	-1.89617	1073,4130,5341,10013,10677,11075,11344,25802,345611	CFL2,MAP1A,PLEK,HDAC6,AVIL,STMN2,TWF2,LMOD1,IRGM	9/123
19_Member	GO Biological Processes	GO:0110053	regulation of actin filament organization	-3.5212	-1.86121	25,1073,5058,5063,5217,5341,8936,10152,10677,11344,25802,29108,54961,348110	ABL1,CFL2,PAK1,PAK3,PFN2,PLEK,WASF1,ABI2,AVIL,TWF2,LMOD1,PYCARD,SSH3,ARPIN	14/274
19_Member	GO Biological Processes	GO:0031334	positive regulation of protein-containing complex assembly	-3.1826	-1.60928	3958,5058,5217,5341,6622,7040,7157,11315,25802,29108,51673	LGALS3,PAK1,PFN2,PLEK,SNCA,TGFB1,TP53,PARK7,LMOD1,PYCARD,TPPP3	11/198
19_Member	GO Biological Processes	GO:0010638	positive regulation of organelle organization	-2.86388	-1.36571	25,1073,5058,5217,5341,6622,7157,7320,8936,9212,10152,10524,11075,11315,25793,25802,29108,93974,345611	ABL1,CFL2,PAK1,PFN2,PLEK,SNCA,TP53,UBE2B,WASF1,AURKB,ABI2,KAT5,STMN2,PARK7,FBXO7,LMOD1,PYCARD,ATP5IF1,IRGM	19/508
19_Member	GO Biological Processes	GO:0008064	regulation of actin polymerization or depolymerization	-2.83393	-1.3433	1073,5063,5217,5341,10677,11344,25802,29108,54961	CFL2,PAK3,PFN2,PLEK,AVIL,TWF2,LMOD1,PYCARD,SSH3	9/155
19_Member	GO Biological Processes	GO:0051495	positive regulation of cytoskeleton organization	-2.81888	-1.33066	25,1073,5058,5217,5341,8936,10152,11075,25802,29108	ABL1,CFL2,PAK1,PFN2,PLEK,WASF1,ABI2,STMN2,LMOD1,PYCARD	10/187
19_Member	GO Biological Processes	GO:0030832	regulation of actin filament length	-2.77644	-1.30525	1073,5063,5217,5341,10677,11344,25802,29108,54961	CFL2,PAK3,PFN2,PLEK,AVIL,TWF2,LMOD1,PYCARD,SSH3	9/158
19_Member	GO Biological Processes	GO:0030834	regulation of actin filament depolymerization	-2.67597	-1.23537	1073,5341,10677,11344,25802	CFL2,PLEK,AVIL,TWF2,LMOD1	5/53
19_Member	GO Biological Processes	GO:0030837	negative regulation of actin filament polymerization	-2.40776	-1.03738	5217,10677,11344,25802,54961	PFN2,AVIL,TWF2,LMOD1,SSH3	5/61
19_Member	GO Biological Processes	GO:1901880	negative regulation of protein depolymerization	-2.28938	-0.950271	10013,10677,11075,11344,25802	HDAC6,AVIL,STMN2,TWF2,LMOD1	5/65
19_Member	GO Biological Processes	GO:0030833	regulation of actin filament polymerization	-2.03914	-0.769036	5063,5217,10677,11344,25802,29108,54961	PAK3,PFN2,AVIL,TWF2,LMOD1,PYCARD,SSH3	7/136
19_Member	GO Biological Processes	GO:0043242	negative regulation of protein-containing complex disassembly	-2.02947	-0.76045	10013,10677,11075,11344,25802	HDAC6,AVIL,STMN2,TWF2,LMOD1	5/75
20_Summary	GO Biological Processes	GO:0031175	neuron projection development	-7.63584	-5.07261	999,1398,2670,3251,3676,3912,4130,4134,4135,5058,5063,5357,5803,6277,6647,7345,7414,8936,9585,9693,10013,10129,10479,10857,11075,23181,23242,23390,56896,57698,64919,65078,115908,219699,1073,1465,2817,3856,3880,4629,25802,64753,1001,7428,10152,10486,10487	CDH1,CRK,GFAP,HPRT1,ITGA4,LAMB1,MAP1A,MAP4,MAP6,PAK1,PAK3,PLS1,PTPRZ1,S100A6,SOD1,UCHL1,VCL,WASF1,KIF20B,RAPGEF2,HDAC6,FRY,SLC9A6,PGRMC1,STMN2,DIP2A,COBL,ZDHHC17,DPYSL5,SHTN1,BCL11B,RTN4R,CTHRC1,UNC5B,CFL2,CSRP1,GPC1,KRT8,KRT19,MYH11,LMOD1,CCDC136,CDH3,VHL,ABI2,CAP2,CAP1	47/-
20_Member	GO Biological Processes	GO:0031175	neuron projection development	-7.63584	-5.07261	999,1398,2670,3251,3676,3912,4130,4134,4135,5058,5063,5357,5803,6277,6647,7345,7414,8936,9585,9693,10013,10129,10479,10857,11075,23181,23242,23390,56896,57698,64919,65078,115908,219699	CDH1,CRK,GFAP,HPRT1,ITGA4,LAMB1,MAP1A,MAP4,MAP6,PAK1,PAK3,PLS1,PTPRZ1,S100A6,SOD1,UCHL1,VCL,WASF1,KIF20B,RAPGEF2,HDAC6,FRY,SLC9A6,PGRMC1,STMN2,DIP2A,COBL,ZDHHC17,DPYSL5,SHTN1,BCL11B,RTN4R,CTHRC1,UNC5B	34/670
20_Member	GO Biological Processes	GO:0032989	cellular component morphogenesis	-7.23366	-4.7772	1073,1465,2817,3251,3676,3856,3880,4130,4135,4629,5058,5063,5803,6277,7345,7414,8936,9585,10013,10479,10857,23181,23242,23390,25802,56896,57698,64753,64919,65078,219699	CFL2,CSRP1,GPC1,HPRT1,ITGA4,KRT8,KRT19,MAP1A,MAP6,MYH11,PAK1,PAK3,PTPRZ1,S100A6,UCHL1,VCL,WASF1,KIF20B,HDAC6,SLC9A6,PGRMC1,DIP2A,COBL,ZDHHC17,LMOD1,DPYSL5,SHTN1,CCDC136,BCL11B,RTN4R,UNC5B	31/597
20_Member	GO Biological Processes	GO:0000902	cell morphogenesis	-6.90609	-4.53066	999,1001,3251,3676,4130,4135,5058,5063,5357,5803,6277,6647,7345,7414,7428,8936,9585,10013,10129,10152,10479,10486,10487,10857,23181,23242,23390,56896,57698,64919,65078,219699	CDH1,CDH3,HPRT1,ITGA4,MAP1A,MAP6,PAK1,PAK3,PLS1,PTPRZ1,S100A6,SOD1,UCHL1,VCL,VHL,WASF1,KIF20B,HDAC6,FRY,ABI2,SLC9A6,CAP2,CAP1,PGRMC1,DIP2A,COBL,ZDHHC17,DPYSL5,SHTN1,BCL11B,RTN4R,UNC5B	32/651
20_Member	GO Biological Processes	GO:0048667	cell morphogenesis involved in neuron differentiation	-5.31723	-3.26093	3251,3676,4130,4135,5063,5357,5803,6277,6647,7345,7414,10013,10479,10857,23181,23242,23390,56896,57698,64919,65078,219699	HPRT1,ITGA4,MAP1A,MAP6,PAK3,PLS1,PTPRZ1,S100A6,SOD1,UCHL1,VCL,HDAC6,SLC9A6,PGRMC1,DIP2A,COBL,ZDHHC17,DPYSL5,SHTN1,BCL11B,RTN4R,UNC5B	22/423
20_Member	GO Biological Processes	GO:0048812	neuron projection morphogenesis	-5.18856	-3.15597	3251,3676,4130,4135,5058,5063,5803,6277,7345,7414,8936,9585,10013,10479,10857,23181,23242,23390,56896,57698,64919,65078,219699	HPRT1,ITGA4,MAP1A,MAP6,PAK1,PAK3,PTPRZ1,S100A6,UCHL1,VCL,WASF1,KIF20B,HDAC6,SLC9A6,PGRMC1,DIP2A,COBL,ZDHHC17,DPYSL5,SHTN1,BCL11B,RTN4R,UNC5B	23/464
20_Member	GO Biological Processes	GO:0120039	plasma membrane bounded cell projection morphogenesis	-5.11314	-3.09904	3251,3676,4130,4135,5058,5063,5803,6277,7345,7414,8936,9585,10013,10479,10857,23181,23242,23390,56896,57698,64919,65078,219699	HPRT1,ITGA4,MAP1A,MAP6,PAK1,PAK3,PTPRZ1,S100A6,UCHL1,VCL,WASF1,KIF20B,HDAC6,SLC9A6,PGRMC1,DIP2A,COBL,ZDHHC17,DPYSL5,SHTN1,BCL11B,RTN4R,UNC5B	23/469
20_Member	GO Biological Processes	GO:0048858	cell projection morphogenesis	-5.03892	-3.03671	3251,3676,4130,4135,5058,5063,5803,6277,7345,7414,8936,9585,10013,10479,10857,23181,23242,23390,56896,57698,64919,65078,219699	HPRT1,ITGA4,MAP1A,MAP6,PAK1,PAK3,PTPRZ1,S100A6,UCHL1,VCL,WASF1,KIF20B,HDAC6,SLC9A6,PGRMC1,DIP2A,COBL,ZDHHC17,DPYSL5,SHTN1,BCL11B,RTN4R,UNC5B	23/474
20_Member	GO Biological Processes	GO:0000904	cell morphogenesis involved in differentiation	-4.76724	-2.81488	3251,3676,4130,4135,5063,5357,5803,6277,6647,7345,7414,10013,10152,10479,10857,23181,23242,23390,56896,57698,64919,65078,219699	HPRT1,ITGA4,MAP1A,MAP6,PAK3,PLS1,PTPRZ1,S100A6,SOD1,UCHL1,VCL,HDAC6,ABI2,SLC9A6,PGRMC1,DIP2A,COBL,ZDHHC17,DPYSL5,SHTN1,BCL11B,RTN4R,UNC5B	23/493
20_Member	GO Biological Processes	GO:0032990	cell part morphogenesis	-4.75338	-2.80652	3251,3676,4130,4135,5058,5063,5803,6277,7345,7414,8936,9585,10013,10479,10857,23181,23242,23390,56896,57698,64919,65078,219699	HPRT1,ITGA4,MAP1A,MAP6,PAK1,PAK3,PTPRZ1,S100A6,UCHL1,VCL,WASF1,KIF20B,HDAC6,SLC9A6,PGRMC1,DIP2A,COBL,ZDHHC17,DPYSL5,SHTN1,BCL11B,RTN4R,UNC5B	23/494
20_Member	GO Biological Processes	GO:0007409	axonogenesis	-3.85524	-2.11091	3676,4130,5063,5803,6277,7345,7414,10013,10479,10857,23242,23390,56896,57698,64919,65078,219699	ITGA4,MAP1A,PAK3,PTPRZ1,S100A6,UCHL1,VCL,HDAC6,SLC9A6,PGRMC1,COBL,ZDHHC17,DPYSL5,SHTN1,BCL11B,RTN4R,UNC5B	17/352
20_Member	GO Biological Processes	GO:0061564	axon development	-3.12001	-1.56244	3676,4130,5063,5803,6277,7345,7414,10013,10479,10857,23242,23390,56896,57698,64919,65078,219699	ITGA4,MAP1A,PAK3,PTPRZ1,S100A6,UCHL1,VCL,HDAC6,SLC9A6,PGRMC1,COBL,ZDHHC17,DPYSL5,SHTN1,BCL11B,RTN4R,UNC5B	17/408

## Sheet: Δ9 D4 UP
GroupID	Category	Term	Description	LogP	Log(q-value)	Genes	Symbols	InTerm_InList
1_Summary	Canonical Pathways	M3008	NABA ECM GLYCOPROTEINS	-16.2107	-11.8621	2192,2199,2244,2335,3912,4052,4811,7448,10631,11117,22795,26577,30008,51232,64856,255743,375790,3339,3676,5340,5654,7040,22801,25,182,54507,941,10524	FBLN1,FBLN2,FGB,FN1,LAMB1,LTBP1,NID1,VTN,POSTN,EMILIN1,NID2,PCOLCE2,EFEMP2,CRIM1,VWA1,NPNT,AGRN,HSPG2,ITGA4,PLG,HTRA1,TGFB1,ITGA11,ABL1,JAG1,ADAMTSL4,CD80,KAT5	28/-
1_Member	Canonical Pathways	M3008	NABA ECM GLYCOPROTEINS	-16.2107	-11.8621	2192,2199,2244,2335,3912,4052,4811,7448,10631,11117,22795,26577,30008,51232,64856,255743,375790	FBLN1,FBLN2,FGB,FN1,LAMB1,LTBP1,NID1,VTN,POSTN,EMILIN1,NID2,PCOLCE2,EFEMP2,CRIM1,VWA1,NPNT,AGRN	17/196
1_Member	Reactome Gene Sets	R-HSA-1474244	Extracellular matrix organization	-15.5302	-11.4827	2192,2199,2244,2335,3339,3676,3912,4052,4811,5340,5654,7040,7448,11117,22795,22801,26577,30008,375790	FBLN1,FBLN2,FGB,FN1,HSPG2,ITGA4,LAMB1,LTBP1,NID1,PLG,HTRA1,TGFB1,VTN,EMILIN1,NID2,ITGA11,PCOLCE2,EFEMP2,AGRN	19/300
1_Member	Canonical Pathways	M5884	NABA CORE MATRISOME	-14.9776	-11.1062	2192,2199,2244,2335,3339,3912,4052,4811,7448,10631,11117,22795,26577,30008,51232,64856,255743,375790	FBLN1,FBLN2,FGB,FN1,HSPG2,LAMB1,LTBP1,NID1,VTN,POSTN,EMILIN1,NID2,PCOLCE2,EFEMP2,CRIM1,VWA1,NPNT,AGRN	18/275
1_Member	Reactome Gene Sets	R-HSA-2129379	Molecules associated with elastic fibres	-11.1766	-7.52702	2192,2199,2335,4052,7040,7448,11117,30008	FBLN1,FBLN2,FN1,LTBP1,TGFB1,VTN,EMILIN1,EFEMP2	8/37
1_Member	Reactome Gene Sets	R-HSA-1566948	Elastic fibre formation	-10.5267	-7.02328	2192,2199,2335,4052,7040,7448,11117,30008	FBLN1,FBLN2,FN1,LTBP1,TGFB1,VTN,EMILIN1,EFEMP2	8/44
1_Member	GO Biological Processes	GO:0010810	regulation of cell-substrate adhesion	-9.16526	-6.13426	25,182,2192,2199,2244,2335,4811,5340,7448,11117,30008,255743	ABL1,JAG1,FBLN1,FBLN2,FGB,FN1,NID1,PLG,VTN,EMILIN1,EFEMP2,NPNT	12/222
1_Member	GO Biological Processes	GO:0030198	extracellular matrix organization	-8.16863	-5.25144	2192,4811,5340,7040,7448,10631,11117,22795,30008,54507,64856,255743	FBLN1,NID1,PLG,TGFB1,VTN,POSTN,EMILIN1,NID2,EFEMP2,ADAMTSL4,VWA1,NPNT	12/272
1_Member	GO Biological Processes	GO:0043062	extracellular structure organization	-8.15084	-5.24944	2192,4811,5340,7040,7448,10631,11117,22795,30008,54507,64856,255743	FBLN1,NID1,PLG,TGFB1,VTN,POSTN,EMILIN1,NID2,EFEMP2,ADAMTSL4,VWA1,NPNT	12/273
1_Member	GO Biological Processes	GO:0045229	external encapsulating structure organization	-8.11547	-5.22931	2192,4811,5340,7040,7448,10631,11117,22795,30008,54507,64856,255743	FBLN1,NID1,PLG,TGFB1,VTN,POSTN,EMILIN1,NID2,EFEMP2,ADAMTSL4,VWA1,NPNT	12/275
1_Member	GO Biological Processes	GO:0010811	positive regulation of cell-substrate adhesion	-8.08231	-5.21087	25,2199,2244,2335,4811,7448,11117,30008,255743	ABL1,FBLN2,FGB,FN1,NID1,VTN,EMILIN1,EFEMP2,NPNT	9/125
1_Member	GO Biological Processes	GO:0045785	positive regulation of cell adhesion	-6.30918	-3.63272	25,941,2199,2244,2335,3676,3912,4811,7448,10524,11117,30008,255743	ABL1,CD80,FBLN2,FGB,FN1,ITGA4,LAMB1,NID1,VTN,KAT5,EMILIN1,EFEMP2,NPNT	13/482
2_Summary	Canonical Pathways	M18	PID INTEGRIN1 PATHWAY	-12.1961	-8.44964	2162,2244,2335,3676,3912,4811,7448,22801,93185,255743,25,11117,22795,3339,375790,7040,5460,941,182,6908,7157,84552,5341,2321,4609,1001,65078	F13A1,FGB,FN1,ITGA4,LAMB1,NID1,VTN,ITGA11,IGSF8,NPNT,ABL1,EMILIN1,NID2,HSPG2,AGRN,TGFB1,POU5F1,CD80,JAG1,TBP,TP53,PARD6G,PLEK,FLT1,MYC,CDH3,RTN4R	27/-
2_Member	Canonical Pathways	M18	PID INTEGRIN1 PATHWAY	-12.1961	-8.44964	2162,2244,2335,3676,3912,4811,7448,22801,93185,255743	F13A1,FGB,FN1,ITGA4,LAMB1,NID1,VTN,ITGA11,IGSF8,NPNT	10/66
2_Member	GO Biological Processes	GO:0031589	cell-substrate adhesion	-8.87827	-5.92765	25,2244,2335,3676,3912,4811,7448,11117,22795,22801,255743	ABL1,FGB,FN1,ITGA4,LAMB1,NID1,VTN,EMILIN1,NID2,ITGA11,NPNT	11/185
2_Member	KEGG Pathway	hsa04512	ECM-receptor interaction	-8.04256	-5.18536	2335,3339,3676,3912,7448,22801,255743,375790	FN1,HSPG2,ITGA4,LAMB1,VTN,ITGA11,NPNT,AGRN	8/88
2_Member	GO Biological Processes	GO:0007160	cell-matrix adhesion	-7.76099	-4.96874	2244,2335,3676,4811,7448,11117,22795,22801,255743	FGB,FN1,ITGA4,NID1,VTN,EMILIN1,NID2,ITGA11,NPNT	9/136
2_Member	Reactome Gene Sets	R-HSA-216083	Integrin cell surface interactions	-6.80244	-4.05595	2244,2335,3339,3676,7448,22801,375790	FGB,FN1,HSPG2,ITGA4,VTN,ITGA11,AGRN	7/85
2_Member	Reactome Gene Sets	R-HSA-3000171	Non-integrin membrane-ECM interactions	-6.45139	-3.76559	2335,3339,3912,7040,7448,375790	FN1,HSPG2,LAMB1,TGFB1,VTN,AGRN	6/59
2_Member	GO Biological Processes	GO:0033627	cell adhesion mediated by integrin	-5.91171	-3.26188	3676,7448,11117,22801,255743	ITGA4,VTN,EMILIN1,ITGA11,NPNT	5/40
2_Member	Reactome Gene Sets	R-HSA-3000178	ECM proteoglycans	-5.79389	-3.16134	2335,3339,3912,7040,7448,375790	FN1,HSPG2,LAMB1,TGFB1,VTN,AGRN	6/76
2_Member	GO Biological Processes	GO:0035987	endodermal cell differentiation	-5.75141	-3.13525	2335,3676,3912,5460,7448	FN1,ITGA4,LAMB1,POU5F1,VTN	5/43
2_Member	GO Biological Processes	GO:0001706	endoderm formation	-5.29339	-2.77734	2335,3676,3912,5460,7448	FN1,ITGA4,LAMB1,POU5F1,VTN	5/53
2_Member	WikiPathways	WP453	Inflammatory response pathway	-4.93522	-2.48429	941,2335,3912,7448	CD80,FN1,LAMB1,VTN	4/30
2_Member	KEGG Pathway	hsa05165	Human papillomavirus infection	-4.54951	-2.1942	182,2335,3676,3912,6908,7157,7448,22801,84552	JAG1,FN1,ITGA4,LAMB1,TBP,TP53,VTN,ITGA11,PARD6G	9/331
2_Member	GO Biological Processes	GO:0007492	endoderm development	-4.46758	-2.12334	2335,3676,3912,5460,7448	FN1,ITGA4,LAMB1,POU5F1,VTN	5/78
2_Member	Canonical Pathways	M53	PID INTEGRIN3 PATHWAY	-4.30227	-1.97902	2244,2335,3912,7448	FGB,FN1,LAMB1,VTN	4/43
2_Member	Canonical Pathways	M212	PID INTEGRIN5 PATHWAY	-4.1827	-1.89105	2335,3676,7448	FN1,ITGA4,VTN	3/17
2_Member	GO Biological Processes	GO:0034446	substrate adhesion-dependent cell spreading	-4.14863	-1.86826	25,2335,3676,3912	ABL1,FN1,ITGA4,LAMB1	4/47
2_Member	GO Biological Processes	GO:0007229	integrin-mediated signaling pathway	-4.07869	-1.82356	25,2335,3676,5341,22801	ABL1,FN1,ITGA4,PLEK,ITGA11	5/94
2_Member	GO Biological Processes	GO:0007369	gastrulation	-3.83159	-1.65913	2335,3676,3912,5460,7157,7448	FN1,ITGA4,LAMB1,POU5F1,TP53,VTN	6/168
2_Member	WikiPathways	WP4172	PI3K-Akt signaling pathway	-3.6788	-1.54865	2321,2335,3676,3912,4609,7157,7448,22801	FLT1,FN1,ITGA4,LAMB1,MYC,TP53,VTN,ITGA11	8/339
2_Member	GO Biological Processes	GO:0001704	formation of primary germ layer	-3.59732	-1.50644	2335,3676,3912,5460,7448	FN1,ITGA4,LAMB1,POU5F1,VTN	5/119
2_Member	KEGG Pathway	hsa04151	PI3K-Akt signaling pathway	-3.55231	-1.47791	2321,2335,3676,3912,4609,7157,7448,22801	FLT1,FN1,ITGA4,LAMB1,MYC,TP53,VTN,ITGA11	8/354
2_Member	WikiPathways	WP306	Focal adhesion	-3.44727	-1.40834	2321,2335,3676,3912,7448,22801	FLT1,FN1,ITGA4,LAMB1,VTN,ITGA11	6/198
2_Member	KEGG Pathway	hsa04510	Focal adhesion	-3.38975	-1.36537	2321,2335,3676,3912,7448,22801	FLT1,FN1,ITGA4,LAMB1,VTN,ITGA11	6/203
2_Member	Canonical Pathways	M277	PID INTEGRIN A4B1 PATHWAY	-3.30222	-1.30002	2335,3676,93185	FN1,ITGA4,IGSF8	3/33
2_Member	WikiPathways	WP3932	Focal adhesion: PI3K-Akt-mTOR-signaling pathway	-2.50758	-0.747859	2321,2335,3676,3912,7448,22801	FLT1,FN1,ITGA4,LAMB1,VTN,ITGA11	6/302
2_Member	GO Biological Processes	GO:0098609	cell-cell adhesion	-2.40724	-0.676728	25,1001,2244,3676,3912,5341,22801,255743	ABL1,CDH3,FGB,ITGA4,LAMB1,PLEK,ITGA11,NPNT	8/536
2_Member	GO Biological Processes	GO:0030516	regulation of axon extension	-2.05357	-0.440612	25,2335,65078	ABL1,FN1,RTN4R	3/90
2_Member	GO Biological Processes	GO:0008361	regulation of cell size	-2.0066	-0.404675	25,2335,5341,65078	ABL1,FN1,PLEK,RTN4R	4/177
3_Summary	Reactome Gene Sets	R-HSA-109582	Hemostasis	-10.8446	-7.27422	25,2147,2153,2162,2244,2335,2817,3676,3835,5270,5340,5341,5627,7035,7040,7157,8795,9493,9585,146909	ABL1,F2,F5,F13A1,FGB,FN1,GPC1,ITGA4,KIF22,SERPINE2,PLG,PLEK,PROS1,TFPI,TGFB1,TP53,TNFRSF10B,KIF23,KIF20B,KIF18B	20/-
3_Member	Reactome Gene Sets	R-HSA-109582	Hemostasis	-10.8446	-7.27422	25,2147,2153,2162,2244,2335,2817,3676,3835,5270,5340,5341,5627,7035,7040,7157,8795,9493,9585,146909	ABL1,F2,F5,F13A1,FGB,FN1,GPC1,ITGA4,KIF22,SERPINE2,PLG,PLEK,PROS1,TFPI,TGFB1,TP53,TNFRSF10B,KIF23,KIF20B,KIF18B	20/621
3_Member	Reactome Gene Sets	R-HSA-202733	Cell surface interactions at the vascular wall	-5.39691	-2.85454	2147,2335,2817,3676,5627,7040,8795	F2,FN1,GPC1,ITGA4,PROS1,TGFB1,TNFRSF10B	7/137
4_Summary	GO Biological Processes	GO:0030195	negative regulation of blood coagulation	-10.4434	-7.02266	2147,2244,5270,5340,5627,7035,7448,114897,11117,1001,2153,2162,2192,2335,3162,5341,7040,646960,5460,65078,5654,9212,345611,3912,7157,54507,4023,2817	F2,FGB,SERPINE2,PLG,PROS1,TFPI,VTN,C1QTNF1,EMILIN1,CDH3,F5,F13A1,FBLN1,FN1,HMOX1,PLEK,TGFB1,PRSS56,POU5F1,RTN4R,HTRA1,AURKB,IRGM,LAMB1,TP53,ADAMTSL4,LPL,GPC1	28/-
4_Member	GO Biological Processes	GO:0030195	negative regulation of blood coagulation	-10.4434	-7.02266	2147,2244,5270,5340,5627,7035,7448,114897	F2,FGB,SERPINE2,PLG,PROS1,TFPI,VTN,C1QTNF1	8/45
4_Member	GO Biological Processes	GO:0030193	regulation of blood coagulation	-10.417	-7.02266	2147,2244,5270,5340,5627,7035,7448,11117,114897	F2,FGB,SERPINE2,PLG,PROS1,TFPI,VTN,EMILIN1,C1QTNF1	9/69
4_Member	GO Biological Processes	GO:1900047	negative regulation of hemostasis	-10.3622	-7.01362	2147,2244,5270,5340,5627,7035,7448,114897	F2,FGB,SERPINE2,PLG,PROS1,TFPI,VTN,C1QTNF1	8/46
4_Member	GO Biological Processes	GO:1900046	regulation of hemostasis	-10.3018	-6.99462	2147,2244,5270,5340,5627,7035,7448,11117,114897	F2,FGB,SERPINE2,PLG,PROS1,TFPI,VTN,EMILIN1,C1QTNF1	9/71
4_Member	GO Biological Processes	GO:0042060	wound healing	-10.2033	-6.93392	1001,2147,2153,2162,2192,2244,2335,3162,5270,5340,5341,5627,7035,7040,646960	CDH3,F2,F5,F13A1,FBLN1,FGB,FN1,HMOX1,SERPINE2,PLG,PLEK,PROS1,TFPI,TGFB1,PRSS56	15/334
4_Member	GO Biological Processes	GO:0050818	regulation of coagulation	-10.1355	-6.92726	2147,2244,5270,5340,5627,7035,7448,11117,114897	F2,FGB,SERPINE2,PLG,PROS1,TFPI,VTN,EMILIN1,C1QTNF1	9/74
4_Member	GO Biological Processes	GO:0050819	negative regulation of coagulation	-10.1297	-6.92726	2147,2244,5270,5340,5627,7035,7448,114897	F2,FGB,SERPINE2,PLG,PROS1,TFPI,VTN,C1QTNF1	8/49
4_Member	KEGG Pathway	hsa04610	Complement and coagulation cascades	-9.53699	-6.36452	2147,2153,2162,2244,5270,5340,5627,7035,7448	F2,F5,F13A1,FGB,SERPINE2,PLG,PROS1,TFPI,VTN	9/86
4_Member	GO Biological Processes	GO:0009611	response to wounding	-9.33509	-6.19065	1001,2147,2153,2162,2192,2244,2335,3162,5270,5340,5341,5460,5627,7035,7040,646960	CDH3,F2,F5,F13A1,FBLN1,FGB,FN1,HMOX1,SERPINE2,PLG,PLEK,POU5F1,PROS1,TFPI,TGFB1,PRSS56	16/452
4_Member	Reactome Gene Sets	R-HSA-140877	Formation of Fibrin Clot (Clotting Cascade)	-9.23077	-6.13527	2147,2153,2162,2244,5270,5627,7035	F2,F5,F13A1,FGB,SERPINE2,PROS1,TFPI	7/39
4_Member	GO Biological Processes	GO:1903035	negative regulation of response to wounding	-9.22856	-6.13527	2147,2244,5270,5340,5627,7035,7448,65078,114897	F2,FGB,SERPINE2,PLG,PROS1,TFPI,VTN,RTN4R,C1QTNF1	9/93
4_Member	Reactome Gene Sets	R-HSA-140875	Common Pathway of Fibrin Clot Formation	-9.17038	-6.13426	2147,2153,2162,2244,5270,5627	F2,F5,F13A1,FGB,SERPINE2,PROS1	6/22
4_Member	GO Biological Processes	GO:0007596	blood coagulation	-9.1606	-6.13426	2147,2153,2162,2192,2244,5270,5340,5341,5627,7035,646960	F2,F5,F13A1,FBLN1,FGB,SERPINE2,PLG,PLEK,PROS1,TFPI,PRSS56	11/174
4_Member	GO Biological Processes	GO:0050817	coagulation	-9.10783	-6.1017	2147,2153,2162,2192,2244,5270,5340,5341,5627,7035,646960	F2,F5,F13A1,FBLN1,FGB,SERPINE2,PLG,PLEK,PROS1,TFPI,PRSS56	11/176
4_Member	GO Biological Processes	GO:0007599	hemostasis	-9.00425	-6.01742	2147,2153,2162,2192,2244,5270,5340,5341,5627,7035,646960	F2,F5,F13A1,FBLN1,FGB,SERPINE2,PLG,PLEK,PROS1,TFPI,PRSS56	11/180
4_Member	GO Biological Processes	GO:0050878	regulation of body fluid levels	-8.91605	-5.9477	2147,2153,2162,2192,2244,5270,5340,5341,5627,7035,7448,11117,114897,646960	F2,F5,F13A1,FBLN1,FGB,SERPINE2,PLG,PLEK,PROS1,TFPI,VTN,EMILIN1,C1QTNF1,PRSS56	14/349
4_Member	GO Biological Processes	GO:0061045	negative regulation of wound healing	-8.69647	-5.76289	2147,2244,5270,5340,5627,7035,7448,114897	F2,FGB,SERPINE2,PLG,PROS1,TFPI,VTN,C1QTNF1	8/73
4_Member	GO Biological Processes	GO:1903034	regulation of response to wounding	-7.9995	-5.15609	2147,2244,5270,5340,5627,7035,7448,11117,65078,114897	F2,FGB,SERPINE2,PLG,PROS1,TFPI,VTN,EMILIN1,RTN4R,C1QTNF1	10/173
4_Member	WikiPathways	WP4927	COVID-19, thrombosis and anticoagulation	-7.79252	-4.97544	2147,2162,2244,5340	F2,F13A1,FGB,PLG	4/7
4_Member	GO Biological Processes	GO:0061041	regulation of wound healing	-7.76099	-4.96874	2147,2244,5270,5340,5627,7035,7448,11117,114897	F2,FGB,SERPINE2,PLG,PROS1,TFPI,VTN,EMILIN1,C1QTNF1	9/136
4_Member	Reactome Gene Sets	R-HSA-114608	Platelet degranulation	-6.7377	-4.00192	2153,2162,2244,2335,5340,5341,5627,7040	F5,F13A1,FGB,FN1,PLG,PLEK,PROS1,TGFB1	8/129
4_Member	Reactome Gene Sets	R-HSA-76005	Response to elevated platelet cytosolic Ca2+	-6.61047	-3.88516	2153,2162,2244,2335,5340,5341,5627,7040	F5,F13A1,FGB,FN1,PLG,PLEK,PROS1,TGFB1	8/134
4_Member	WikiPathways	WP558	Complement and coagulation cascades	-6.49629	-3.7812	2147,2153,2244,5340,5627,7035	F2,F5,FGB,PLG,PROS1,TFPI	6/58
4_Member	GO Biological Processes	GO:0032102	negative regulation of response to external stimulus	-6.48511	-3.78	2147,2244,5270,5340,5627,5654,7035,7040,7448,9212,65078,114897,345611	F2,FGB,SERPINE2,PLG,PROS1,HTRA1,TFPI,TGFB1,VTN,AURKB,RTN4R,C1QTNF1,IRGM	13/465
4_Member	GO Biological Processes	GO:0042730	fibrinolysis	-5.76724	-3.14296	2147,2244,5340,5627	F2,FGB,PLG,PROS1	4/19
4_Member	WikiPathways	WP272	Blood clotting cascade	-5.49617	-2.92226	2147,2153,2244,5340	F2,F5,FGB,PLG	4/22
4_Member	Reactome Gene Sets	R-HSA-76002	Platelet activation, signaling and aggregation	-5.34415	-2.81514	2147,2153,2162,2244,2335,5340,5341,5627,7040	F2,F5,F13A1,FGB,FN1,PLG,PLEK,PROS1,TGFB1	9/263
4_Member	WikiPathways	WP2806	Complement system	-5.17382	-2.67036	2162,2244,3912,5340,5627,7448	F13A1,FGB,LAMB1,PLG,PROS1,VTN	6/97
4_Member	GO Biological Processes	GO:0030194	positive regulation of blood coagulation	-5.05866	-2.57343	2147,5340,7448,11117	F2,PLG,VTN,EMILIN1	4/28
4_Member	GO Biological Processes	GO:1900048	positive regulation of hemostasis	-5.05866	-2.57343	2147,5340,7448,11117	F2,PLG,VTN,EMILIN1	4/28
4_Member	GO Biological Processes	GO:0050820	positive regulation of coagulation	-4.93522	-2.48429	2147,5340,7448,11117	F2,PLG,VTN,EMILIN1	4/30
4_Member	GO Biological Processes	GO:0051918	negative regulation of fibrinolysis	-4.55286	-2.1942	2147,5340,7448	F2,PLG,VTN	3/13
4_Member	GO Biological Processes	GO:0051917	regulation of fibrinolysis	-4.10501	-1.83953	2147,5340,7448	F2,PLG,VTN	3/18
4_Member	Reactome Gene Sets	R-HSA-140837	Intrinsic Pathway of Fibrin Clot Formation	-3.77596	-1.61773	2147,5270,5627	F2,SERPINE2,PROS1	3/23
4_Member	GO Biological Processes	GO:0090303	positive regulation of wound healing	-3.6771	-1.54865	2147,5340,7448,11117	F2,PLG,VTN,EMILIN1	4/62
4_Member	WikiPathways	WP176	Folate metabolism	-3.49788	-1.43612	2147,2244,5340,7157	F2,FGB,PLG,TP53	4/69
4_Member	GO Biological Processes	GO:1903036	positive regulation of response to wounding	-3.33745	-1.32734	2147,5340,7448,11117	F2,PLG,VTN,EMILIN1	4/76
4_Member	Canonical Pathways	M3468	NABA ECM REGULATORS	-3.02843	-1.10926	2147,2162,5270,5340,5654,54507	F2,F13A1,SERPINE2,PLG,HTRA1,ADAMTSL4	6/238
4_Member	Reactome Gene Sets	R-HSA-977606	Regulation of Complement cascade	-2.85002	-0.984332	2147,5627,7448	F2,PROS1,VTN	3/47
4_Member	Reactome Gene Sets	R-HSA-166658	Complement cascade	-2.58692	-0.79827	2147,5627,7448	F2,PROS1,VTN	3/58
4_Member	GO Biological Processes	GO:0032103	positive regulation of response to external stimulus	-2.39758	-0.670203	2147,4023,5340,7040,7448,11117,345611,646960	F2,LPL,PLG,TGFB1,VTN,EMILIN1,IRGM,PRSS56	8/538
4_Member	WikiPathways	WP15	Selenium micronutrient network	-2.1076	-0.475044	2147,2244,5340	F2,FGB,PLG	3/86
4_Member	Canonical Pathways	M5885	NABA MATRISOME ASSOCIATED	-2.0365	-0.426722	2147,2162,2817,5270,5340,5654,7040,54507,114897	F2,F13A1,GPC1,SERPINE2,PLG,HTRA1,TGFB1,ADAMTSL4,C1QTNF1	9/751
5_Summary	GO Biological Processes	GO:0090287	regulation of cellular response to growth factor stimulus	-7.95891	-5.12887	25,2817,4052,5654,7040,7157,7448,10016,11117,23390,51232,151556,255743	ABL1,GPC1,LTBP1,HTRA1,TGFB1,TP53,VTN,PDCD6,EMILIN1,ZDHHC17,CRIM1,GPR155,NPNT	13/-
5_Member	GO Biological Processes	GO:0090287	regulation of cellular response to growth factor stimulus	-7.95891	-5.12887	25,2817,4052,5654,7040,7157,7448,10016,11117,23390,51232,151556,255743	ABL1,GPC1,LTBP1,HTRA1,TGFB1,TP53,VTN,PDCD6,EMILIN1,ZDHHC17,CRIM1,GPR155,NPNT	13/347
5_Member	GO Biological Processes	GO:0090288	negative regulation of cellular response to growth factor stimulus	-5.5931	-2.99273	25,2817,5654,10016,11117,51232,151556	ABL1,GPC1,HTRA1,PDCD6,EMILIN1,CRIM1,GPR155	7/128
5_Member	GO Biological Processes	GO:0090092	regulation of transmembrane receptor protein serine/threonine kinase signaling pathway	-4.8514	-2.42713	25,4052,5654,7040,7157,11117,51232,151556,255743	ABL1,LTBP1,HTRA1,TGFB1,TP53,EMILIN1,CRIM1,GPR155,NPNT	9/303
5_Member	GO Biological Processes	GO:0090101	negative regulation of transmembrane receptor protein serine/threonine kinase signaling pathway	-4.76685	-2.36277	25,4052,5654,7157,11117,51232,151556	ABL1,LTBP1,HTRA1,TP53,EMILIN1,CRIM1,GPR155	7/171
5_Member	GO Biological Processes	GO:0017015	regulation of transforming growth factor beta receptor signaling pathway	-4.10173	-1.83953	4052,5654,7040,7157,11117,255743	LTBP1,HTRA1,TGFB1,TP53,EMILIN1,NPNT	6/150
5_Member	GO Biological Processes	GO:1903844	regulation of cellular response to transforming growth factor beta stimulus	-4.05425	-1.8026	4052,5654,7040,7157,11117,255743	LTBP1,HTRA1,TGFB1,TP53,EMILIN1,NPNT	6/153			ii
5_Member	GO Biological Processes	GO:0030514	negative regulation of BMP signaling pathway	-3.45029	-1.40834	25,5654,51232,151556	ABL1,HTRA1,CRIM1,GPR155	4/71
5_Member	GO Biological Processes	GO:0030512	negative regulation of transforming growth factor beta receptor signaling pathway	-2.85816	-0.988168	4052,5654,7157,11117	LTBP1,HTRA1,TP53,EMILIN1	4/102
5_Member	GO Biological Processes	GO:0030510	regulation of BMP signaling pathway	-2.61327	-0.817376	25,5654,51232,151556	ABL1,HTRA1,CRIM1,GPR155	4/119
6_Summary	Canonical Pathways	M5887	NABA BASEMENT MEMBRANES	-7.48921	-4.70885	3339,3912,4811,22795,255743,375790,25,7040,11117,30008,2335,5340,5654	HSPG2,LAMB1,NID1,NID2,NPNT,AGRN,ABL1,TGFB1,EMILIN1,EFEMP2,FN1,PLG,HTRA1	13/-
6_Member	Canonical Pathways	M5887	NABA BASEMENT MEMBRANES	-7.48921	-4.70885	3339,3912,4811,22795,255743,375790	HSPG2,LAMB1,NID1,NID2,NPNT,AGRN	6/40
6_Member	GO Biological Processes	GO:1903053	regulation of extracellular matrix organization	-6.45139	-3.76559	25,3912,4811,7040,11117,30008	ABL1,LAMB1,NID1,TGFB1,EMILIN1,EFEMP2	6/59
6_Member	Reactome Gene Sets	R-HSA-3000157	Laminin interactions	-4.93522	-2.48429	3339,3912,4811,22795	HSPG2,LAMB1,NID1,NID2	4/30
6_Member	Reactome Gene Sets	R-HSA-1474228	Degradation of the extracellular matrix	-4.26805	-1.95672	2335,3339,3912,4811,5340,5654	FN1,HSPG2,LAMB1,NID1,PLG,HTRA1	6/140
6_Member	GO Biological Processes	GO:0051149	positive regulation of muscle cell differentiation	-3.2123	-1.2311	3912,4811,7040,30008	LAMB1,NID1,TGFB1,EFEMP2	4/82
6_Member	GO Biological Processes	GO:0051147	regulation of muscle cell differentiation	-2.13853	-0.491537	3912,4811,7040,30008	LAMB1,NID1,TGFB1,EFEMP2	4/162
7_Summary	GO Biological Processes	GO:0050678	regulation of epithelial cell proliferation	-7.01374	-4.24497	182,1001,2321,3162,3676,3912,4609,5654,6667,7040,10016,29128,93974,2335,7157,9493,11098,22801	JAG1,CDH3,FLT1,HMOX1,ITGA4,LAMB1,MYC,HTRA1,SP1,TGFB1,PDCD6,UHRF1,ATP5IF1,FN1,TP53,KIF23,PRSS23,ITGA11	18/-
7_Member	GO Biological Processes	GO:0050678	regulation of epithelial cell proliferation	-7.01374	-4.24497	182,1001,2321,3162,3676,3912,4609,5654,6667,7040,10016,29128,93974	JAG1,CDH3,FLT1,HMOX1,ITGA4,LAMB1,MYC,HTRA1,SP1,TGFB1,PDCD6,UHRF1,ATP5IF1	13/418
7_Member	WikiPathways	WP5087	Malignant pleural mesothelioma	-5.91146	-3.26188	1001,2321,2335,3676,3912,4609,6667,7040,7157,9493,11098,29128	CDH3,FLT1,FN1,ITGA4,LAMB1,MYC,SP1,TGFB1,TP53,KIF23,PRSS23,UHRF1	12/440
7_Member	GO Biological Processes	GO:0050679	positive regulation of epithelial cell proliferation	-4.94141	-2.48429	1001,3162,3676,3912,4609,5654,6667,10016	CDH3,HMOX1,ITGA4,LAMB1,MYC,HTRA1,SP1,PDCD6	8/224
7_Member	WikiPathways	WP4541	Hippo-Merlin signaling dysregulation	-3.56377	-1.48705	1001,2321,3676,4609,22801	CDH3,FLT1,ITGA4,MYC,ITGA11	5/121
8_Summary	Reactome Gene Sets	R-HSA-381426	Regulation of Insulin-like Growth Factor (IGF) transport and uptake by Insulin-like Growth Factor Binding Proteins (IGFBPs)	-6.84344	-4.08594	2147,2153,2335,3912,4052,5340,11098,64856	F2,F5,FN1,LAMB1,LTBP1,PLG,PRSS23,VWA1	8/-
8_Member	Reactome Gene Sets	R-HSA-381426	Regulation of Insulin-like Growth Factor (IGF) transport and uptake by Insulin-like Growth Factor Binding Proteins (IGFBPs)	-6.84344	-4.08594	2147,2153,2335,3912,4052,5340,11098,64856	F2,F5,FN1,LAMB1,LTBP1,PLG,PRSS23,VWA1	8/125
8_Member	Reactome Gene Sets	R-HSA-8957275	Post-translational protein phosphorylation	-4.90517	-2.47042	2153,2335,3912,4052,11098,64856	F5,FN1,LAMB1,LTBP1,PRSS23,VWA1	6/108
9_Summary	KEGG Pathway	hsa04110	Cell cycle	-6.08564	-3.41832	25,4609,4998,5001,7040,7157,9212,157570,1179,3162,6326,6839,2162,2335,3024,6018,10524,79915,2817,3339,7448,182,3676,2321,2147,3912,6667,29128,63035,5803,65078,5460,8795,8644,941,11117,345611,9493,10410	ABL1,MYC,ORC1,ORC5,TGFB1,TP53,AURKB,ESCO2,CLCA1,HMOX1,SCN2A,SUV39H1,F13A1,FN1,H1-1,RLF,KAT5,ATAD5,GPC1,HSPG2,VTN,JAG1,ITGA4,FLT1,F2,LAMB1,SP1,UHRF1,BCORL1,PTPRZ1,RTN4R,POU5F1,TNFRSF10B,AKR1C3,CD80,EMILIN1,IRGM,KIF23,IFITM3	39/-
9_Member	KEGG Pathway	hsa04110	Cell cycle	-6.08564	-3.41832	25,4609,4998,5001,7040,7157,9212,157570	ABL1,MYC,ORC1,ORC5,TGFB1,TP53,AURKB,ESCO2	8/157
9_Member	GO Biological Processes	GO:0071456	cellular response to hypoxia	-5.43926	-2.88309	1179,3162,4609,6326,6839,7040,7157	CLCA1,HMOX1,MYC,SCN2A,SUV39H1,TGFB1,TP53	7/135
9_Member	GO Biological Processes	GO:0036294	cellular response to decreased oxygen levels	-5.25392	-2.74421	1179,3162,4609,6326,6839,7040,7157	CLCA1,HMOX1,MYC,SCN2A,SUV39H1,TGFB1,TP53	7/144
9_Member	GO Biological Processes	GO:0071453	cellular response to oxygen levels	-4.97189	-2.49257	1179,3162,4609,6326,6839,7040,7157	CLCA1,HMOX1,MYC,SCN2A,SUV39H1,TGFB1,TP53	7/159
9_Member	Reactome Gene Sets	R-HSA-6785807	Interleukin-4 and Interleukin-13 signaling	-4.90517	-2.47042	2162,2335,3162,4609,7040,7157	F13A1,FN1,HMOX1,MYC,TGFB1,TP53	6/108
9_Member	WikiPathways	WP179	Cell cycle	-4.6444	-2.26432	25,4609,4998,5001,7040,7157	ABL1,MYC,ORC1,ORC5,TGFB1,TP53	6/120
9_Member	GO Biological Processes	GO:0051052	regulation of DNA metabolic process	-4.33792	-2.01055	25,3024,4609,5001,6018,7040,7157,9212,10524,79915,157570	ABL1,H1-1,MYC,ORC5,RLF,TGFB1,TP53,AURKB,KAT5,ATAD5,ESCO2	11/533
9_Member	KEGG Pathway	hsa05205	Proteoglycans in cancer	-4.26389	-1.95672	2335,2817,3339,4609,7040,7157,7448	FN1,GPC1,HSPG2,MYC,TGFB1,TP53,VTN	7/205
9_Member	WikiPathways	WP2446	Retinoblastoma gene in cancer	-4.16872	-1.88086	25,4609,4998,6839,7157	ABL1,MYC,ORC1,SUV39H1,TP53	5/90
9_Member	Reactome Gene Sets	R-HSA-8878159	Transcriptional regulation by RUNX3	-4.03524	-1.80059	182,3676,4609,7040,7157	JAG1,ITGA4,MYC,TGFB1,TP53	5/96
9_Member	WikiPathways	WP1742	TP53 network	-4.03187	-1.80059	25,4609,7157	ABL1,MYC,TP53	3/19
9_Member	WikiPathways	WP3640	Imatinib and chronic myeloid leukemia	-3.96279	-1.75411	25,2321,4609	ABL1,FLT1,MYC	3/20
9_Member	KEGG Pathway	hsa05200	Pathways in cancer	-3.66768	-1.54476	25,182,2147,2335,3162,3912,4609,6667,7040,7157	ABL1,JAG1,F2,FN1,HMOX1,LAMB1,MYC,SP1,TGFB1,TP53	10/531
9_Member	WikiPathways	WP45	G1 to S cell cycle control	-3.62373	-1.51573	4609,4998,5001,7157	MYC,ORC1,ORC5,TP53	4/64
9_Member	WikiPathways	WP3651	Pathways affected in adenoid cystic carcinoma	-3.59773	-1.50644	4609,7157,29128,63035	MYC,TP53,UHRF1,BCORL1	4/65
9_Member	WikiPathways	WP2431	Spinal cord injury	-3.56377	-1.48705	4609,5803,7040,7157,65078	MYC,PTPRZ1,TGFB1,TP53,RTN4R	5/121
9_Member	GO Biological Processes	GO:1902893	regulation of miRNA transcription	-3.49788	-1.43612	4609,5460,7040,7157	MYC,POU5F1,TGFB1,TP53	4/69
9_Member	WikiPathways	WP707	DNA damage response	-3.49788	-1.43612	25,4609,7157,8795	ABL1,MYC,TP53,TNFRSF10B	4/69
9_Member	GO Biological Processes	GO:2000379	positive regulation of reactive oxygen species metabolic process	-3.4739	-1.42284	2147,7040,7157,8644	F2,TGFB1,TP53,AKR1C3	4/70
9_Member	Canonical Pathways	M167	PID AP1 PATHWAY	-3.4739	-1.42284	4609,6667,7040,7157	MYC,SP1,TGFB1,TP53	4/70
9_Member	GO Biological Processes	GO:0001666	response to hypoxia	-3.42097	-1.38838	1179,3162,4609,6326,6839,7040,7157	CLCA1,HMOX1,MYC,SCN2A,SUV39H1,TGFB1,TP53	7/281
9_Member	WikiPathways	WP366	TGF-beta signaling pathway	-3.38964	-1.36537	2335,4609,6667,7040,7157	FN1,MYC,SP1,TGFB1,TP53	5/132
9_Member	KEGG Pathway	hsa05220	Chronic myeloid leukemia	-3.33745	-1.32734	25,4609,7040,7157	ABL1,MYC,TGFB1,TP53	4/76
9_Member	GO Biological Processes	GO:0036293	response to decreased oxygen levels	-3.29512	-1.29487	1179,3162,4609,6326,6839,7040,7157	CLCA1,HMOX1,MYC,SCN2A,SUV39H1,TGFB1,TP53	7/295
9_Member	GO Biological Processes	GO:2000628	regulation of miRNA metabolic process	-3.2123	-1.2311	4609,5460,7040,7157	MYC,POU5F1,TGFB1,TP53	4/82
9_Member	GO Biological Processes	GO:0060964	regulation of miRNA-mediated gene silencing	-3.15464	-1.18447	5460,7040,7157	POU5F1,TGFB1,TP53	3/37
9_Member	GO Biological Processes	GO:0048145	regulation of fibroblast proliferation	-3.11546	-1.16135	25,2335,4609,7157	ABL1,FN1,MYC,TP53	4/87
9_Member	GO Biological Processes	GO:1900368	regulation of post-transcriptional gene silencing by RNA	-3.08714	-1.1417	5460,7040,7157	POU5F1,TGFB1,TP53	3/39
9_Member	GO Biological Processes	GO:0070482	response to oxygen levels	-3.07159	-1.13296	1179,3162,4609,6326,6839,7040,7157	CLCA1,HMOX1,MYC,SCN2A,SUV39H1,TGFB1,TP53	7/322
9_Member	GO Biological Processes	GO:0060147	regulation of post-transcriptional gene silencing	-3.05477	-1.12118	5460,7040,7157	POU5F1,TGFB1,TP53	3/40
9_Member	KEGG Pathway	hsa05222	Small cell lung cancer	-3.02456	-1.10926	2335,3912,4609,7157	FN1,LAMB1,MYC,TP53	4/92
9_Member	GO Biological Processes	GO:0060966	regulation of gene silencing by RNA	-3.02325	-1.10926	5460,7040,7157	POU5F1,TGFB1,TP53	3/41
9_Member	WikiPathways	WP4658	Small cell lung cancer	-2.9557	-1.05893	2335,3912,4609,7157	FN1,LAMB1,MYC,TP53	4/96
9_Member	WikiPathways	WP1530	miRNA regulation of DNA damage response	-2.92245	-1.03629	25,4609,7157,8795	ABL1,MYC,TP53,TNFRSF10B	4/98
9_Member	Reactome Gene Sets	R-HSA-449147	Signaling by Interleukins	-2.73835	-0.901679	941,2162,2335,3162,4609,5803,7040,7157	CD80,F13A1,FN1,HMOX1,MYC,PTPRZ1,TGFB1,TP53	8/473
9_Member	WikiPathways	WP710	DNA damage response (only ATM dependent)	-2.72325	-0.892923	25,4609,7040,7157	ABL1,MYC,TGFB1,TP53	4/111
9_Member	GO Biological Processes	GO:1902895	positive regulation of miRNA transcription	-2.72297	-0.892923	4609,7040,7157	MYC,TGFB1,TP53	3/52
9_Member	GO Biological Processes	GO:0048146	positive regulation of fibroblast proliferation	-2.69915	-0.873032	25,2335,4609	ABL1,FN1,MYC	3/53
9_Member	WikiPathways	WP3646	Hepatitis C and hepatocellular carcinoma	-2.6305	-0.830947	4609,7040,7157	MYC,TGFB1,TP53	3/56
9_Member	GO Biological Processes	GO:0002683	negative regulation of immune system process	-2.5897	-0.79865	941,2335,3162,4609,7040,9212,11117,345611	CD80,FN1,HMOX1,MYC,TGFB1,AURKB,EMILIN1,IRGM	8/500
9_Member	GO Biological Processes	GO:2000630	positive regulation of miRNA metabolic process	-2.52453	-0.759166	4609,7040,7157	MYC,TGFB1,TP53	3/61
9_Member	GO Biological Processes	GO:0006275	regulation of DNA replication	-2.47498	-0.724121	5001,7157,79915,157570	ORC5,TP53,ATAD5,ESCO2	4/130
9_Member	WikiPathways	WP1545	miRNAs involved in DNA damage response	-2.39109	-0.666818	25,4609,7157	ABL1,MYC,TP53	3/68
9_Member	WikiPathways	WP3303	RAC1/PAK1/p38/MMP2 pathway	-2.39109	-0.666818	2335,4609,7157	FN1,MYC,TP53	3/68
9_Member	WikiPathways	WP4216	Chromosomal and microsatellite instability in colorectal cancer	-2.3047	-0.60645	4609,7040,7157	MYC,TGFB1,TP53	3/73
9_Member	Reactome Gene Sets	R-HSA-69278	Cell Cycle, Mitotic	-2.29451	-0.599167	25,4609,4998,5001,7157,9212,9493,157570	ABL1,MYC,ORC1,ORC5,TP53,AURKB,KIF23,ESCO2	8/560
9_Member	GO Biological Processes	GO:2000377	regulation of reactive oxygen species metabolic process	-2.26504	-0.580185	2147,7040,7157,8644	F2,TGFB1,TP53,AKR1C3	4/149
9_Member	Reactome Gene Sets	R-HSA-453279	Mitotic G1 phase and G1/S transition	-2.26504	-0.580185	25,4609,4998,5001	ABL1,MYC,ORC1,ORC5	4/149
9_Member	Reactome Gene Sets	R-HSA-1640170	Cell Cycle	-2.26207	-0.579097	25,4609,4998,5001,7157,9212,9493,10524,157570	ABL1,MYC,ORC1,ORC5,TP53,AURKB,KIF23,KAT5,ESCO2	9/691
9_Member	KEGG Pathway	hsa05161	Hepatitis B	-2.13853	-0.491537	3339,4609,7040,7157	HSPG2,MYC,TGFB1,TP53	4/162
9_Member	Reactome Gene Sets	R-HSA-69242	S Phase	-2.12929	-0.488303	4609,4998,5001,157570	MYC,ORC1,ORC5,ESCO2	4/163
9_Member	Reactome Gene Sets	R-HSA-1280215	Cytokine Signaling in Immune system	-2.11239	-0.476479	941,2162,2335,3162,4609,5803,7040,7157,10410	CD80,F13A1,FN1,HMOX1,MYC,PTPRZ1,TGFB1,TP53,IFITM3	9/730
9_Member	KEGG Pathway	hsa05210	Colorectal cancer	-2.1076	-0.475044	4609,7040,7157	MYC,TGFB1,TP53	3/86
9_Member	Reactome Gene Sets	R-HSA-69481	G2/M Checkpoints	-2.093	-0.465429	4998,5001,7157,10524	ORC1,ORC5,TP53,KAT5	4/167
9_Member	KEGG Pathway	hsa05225	Hepatocellular carcinoma	-2.08409	-0.458986	3162,4609,7040,7157	HMOX1,MYC,TGFB1,TP53	4/168
9_Member	GO Biological Processes	GO:0045786	negative regulation of cell cycle	-2.04304	-0.431678	25,4998,6839,7040,7157,9212	ABL1,ORC1,SUV39H1,TGFB1,TP53,AURKB	6/378
9_Member	WikiPathways	WP673	ErbB signaling pathway	-2.02756	-0.420939	25,4609,7157	ABL1,MYC,TP53	3/92
9_Member	WikiPathways	WP4754	IL-18 signaling pathway	-2.02191	-0.416864	2335,3162,5803,6667,7157	FN1,HMOX1,PTPRZ1,SP1,TP53	5/273
10_Summary	Canonical Pathways	M174	PID UPA UPAR PATHWAY	-5.80346	-3.16247	2244,2335,5340,7040,7448,6839,5627,56616,84552	FGB,FN1,PLG,TGFB1,VTN,SUV39H1,PROS1,DIABLO,PARD6G	9/-
10_Member	Canonical Pathways	M174	PID UPA UPAR PATHWAY	-5.80346	-3.16247	2244,2335,5340,7040,7448	FGB,FN1,PLG,TGFB1,VTN	5/42
10_Member	WikiPathways	WP3670	Interactions between LOXL4 and oxidative stress pathway	-4.10501	-1.83953	2335,6839,7040	FN1,SUV39H1,TGFB1	3/18
10_Member	WikiPathways	WP5090	Complement system in neuronal development and plasticity	-3.81281	-1.64895	5627,7040,7448,56616,84552	PROS1,TGFB1,VTN,DIABLO,PARD6G	5/107
10_Member	Reactome Gene Sets	R-HSA-3000170	Syndecan interactions	-3.56402	-1.48705	2335,7040,7448	FN1,TGFB1,VTN	3/27
11_Summary	Reactome Gene Sets	R-HSA-975634	Retinoid metabolism and transport	-5.70066	-3.09246	2817,3339,4023,8644,375790,5091,8034,10560,54344,54507,10402	GPC1,HSPG2,LPL,AKR1C3,AGRN,PC,SLC25A16,SLC19A2,DPM3,ADAMTSL4,ST3GAL6	11/-
11_Member	Reactome Gene Sets	R-HSA-975634	Retinoid metabolism and transport	-5.70066	-3.09246	2817,3339,4023,8644,375790	GPC1,HSPG2,LPL,AKR1C3,AGRN	5/44
11_Member	Reactome Gene Sets	R-HSA-6806667	Metabolism of fat-soluble vitamins	-5.50946	-2.92433	2817,3339,4023,8644,375790	GPC1,HSPG2,LPL,AKR1C3,AGRN	5/48
11_Member	Reactome Gene Sets	R-HSA-196854	Metabolism of vitamins and cofactors	-5.44843	-2.8852	2817,3339,4023,5091,8034,8644,10560,375790	GPC1,HSPG2,LPL,PC,SLC25A16,AKR1C3,SLC19A2,AGRN	8/191
11_Member	Reactome Gene Sets	R-HSA-3656237	Defective EXT2 causes exostoses 2	-4.44962	-2.1139	2817,3339,375790	GPC1,HSPG2,AGRN	3/14
11_Member	Reactome Gene Sets	R-HSA-3656253	Defective EXT1 causes exostoses 1, TRPS2 and CHDS	-4.44962	-2.1139	2817,3339,375790	GPC1,HSPG2,AGRN	3/14
11_Member	Reactome Gene Sets	R-HSA-9694614	Attachment and Entry	-4.03187	-1.80059	2817,3339,375790	GPC1,HSPG2,AGRN	3/19
11_Member	Reactome Gene Sets	R-HSA-3560783	Defective B4GALT7 causes EDS, progeroid type	-3.96279	-1.75411	2817,3339,375790	GPC1,HSPG2,AGRN	3/20
11_Member	Reactome Gene Sets	R-HSA-3560801	Defective B3GAT3 causes JDSSDHD	-3.96279	-1.75411	2817,3339,375790	GPC1,HSPG2,AGRN	3/20
11_Member	Reactome Gene Sets	R-HSA-4420332	Defective B3GALT6 causes EDSP2 and SEMDJL1	-3.96279	-1.75411	2817,3339,375790	GPC1,HSPG2,AGRN	3/20
11_Member	Reactome Gene Sets	R-HSA-2024096	HS-GAG degradation	-3.83516	-1.65913	2817,3339,375790	GPC1,HSPG2,AGRN	3/22
11_Member	Reactome Gene Sets	R-HSA-2187338	Visual phototransduction	-3.83197	-1.65913	2817,3339,4023,8644,375790	GPC1,HSPG2,LPL,AKR1C3,AGRN	5/106
11_Member	Reactome Gene Sets	R-HSA-1971475	A tetrasaccharide linker sequence is required for GAG synthesis	-3.61368	-1.51064	2817,3339,375790	GPC1,HSPG2,AGRN	3/26
11_Member	Reactome Gene Sets	R-HSA-2022928	HS-GAG biosynthesis	-3.38338	-1.36116	2817,3339,375790	GPC1,HSPG2,AGRN	3/31
11_Member	Reactome Gene Sets	R-HSA-3781865	Diseases of glycosylation	-3.23111	-1.24238	2817,3339,54344,54507,375790	GPC1,HSPG2,DPM3,ADAMTSL4,AGRN	5/143
11_Member	Reactome Gene Sets	R-HSA-9772572	Early SARS-CoV-2 Infection Events	-3.12041	-1.16135	2817,3339,375790	GPC1,HSPG2,AGRN	3/38
11_Member	Reactome Gene Sets	R-HSA-3560782	Diseases associated with glycosaminoglycan metabolism	-3.02325	-1.10926	2817,3339,375790	GPC1,HSPG2,AGRN	3/41
11_Member	Reactome Gene Sets	R-HSA-5668914	Diseases of metabolism	-2.92765	-1.03629	2817,3339,5091,54344,54507,375790	GPC1,HSPG2,PC,DPM3,ADAMTSL4,AGRN	6/249
11_Member	Reactome Gene Sets	R-HSA-1793185	Chondroitin sulfate/dermatan sulfate metabolism	-2.77213	-0.931432	2817,3339,375790	GPC1,HSPG2,AGRN	3/50
11_Member	Reactome Gene Sets	R-HSA-1638091	Heparan sulfate/heparin (HS-GAG) metabolism	-2.65293	-0.848441	2817,3339,375790	GPC1,HSPG2,AGRN	3/55
11_Member	Reactome Gene Sets	R-HSA-1630316	Glycosaminoglycan metabolism	-2.54868	-0.772998	2817,3339,10402,375790	GPC1,HSPG2,ST3GAL6,AGRN	4/124
12_Summary	GO Biological Processes	GO:0050865	regulation of cell activation	-5.54797	-2.95529	25,941,2147,2335,3162,5270,5341,7040,10524,11117,57181,79915,114897,345611,7157,54463,3024,9585,84678,2101,4023,7035,8644,7448,2321,8795,9212,4052,255743,10016,51232,140710,4609,182,2395,5460,30008,6667	ABL1,CD80,F2,FN1,HMOX1,SERPINE2,PLEK,TGFB1,KAT5,EMILIN1,SLC39A10,ATAD5,C1QTNF1,IRGM,TP53,RETREG1,H1-1,KIF20B,KDM2B,ESRRA,LPL,TFPI,AKR1C3,VTN,FLT1,TNFRSF10B,AURKB,LTBP1,NPNT,PDCD6,CRIM1,SOGA1,MYC,JAG1,FXN,POU5F1,EFEMP2,SP1	38/-
12_Member	GO Biological Processes	GO:0050865	regulation of cell activation	-5.54797	-2.95529	25,941,2147,2335,3162,5270,5341,7040,10524,11117,57181,79915,114897,345611	ABL1,CD80,F2,FN1,HMOX1,SERPINE2,PLEK,TGFB1,KAT5,EMILIN1,SLC39A10,ATAD5,C1QTNF1,IRGM	14/657
12_Member	GO Biological Processes	GO:0061912	selective autophagy	-3.4739	-1.42284	7040,7157,54463,345611	TGFB1,TP53,RETREG1,IRGM	4/70
12_Member	GO Biological Processes	GO:0000018	regulation of DNA recombination	-3.34497	-1.33002	25,3024,7040,10524,79915	ABL1,H1-1,TGFB1,KAT5,ATAD5	5/135
12_Member	GO Biological Processes	GO:0050867	positive regulation of cell activation	-3.23753	-1.245	25,941,5341,7040,10524,57181,79915,345611	ABL1,CD80,PLEK,TGFB1,KAT5,SLC39A10,ATAD5,IRGM	8/395
12_Member	GO Biological Processes	GO:0001843	neural tube closure	-3.06025	-1.12331	25,7040,9585,84678	ABL1,TGFB1,KIF20B,KDM2B	4/90
12_Member	GO Biological Processes	GO:0060606	tube closure	-3.0423	-1.1137	25,7040,9585,84678	ABL1,TGFB1,KIF20B,KDM2B	4/91
12_Member	GO Biological Processes	GO:0021915	neural tube development	-3.03589	-1.10926	25,7040,9585,10524,84678	ABL1,TGFB1,KIF20B,KAT5,KDM2B	5/158
12_Member	GO Biological Processes	GO:0071396	cellular response to lipid	-2.99213	-1.08448	25,941,2101,4023,7035,7040,8644,10524,345611	ABL1,CD80,ESRRA,LPL,TFPI,TGFB1,AKR1C3,KAT5,IRGM	9/537
12_Member	GO Biological Processes	GO:0014020	primary neural tube formation	-2.9557	-1.05893	25,7040,9585,84678	ABL1,TGFB1,KIF20B,KDM2B	4/96
12_Member	GO Biological Processes	GO:0001841	neural tube formation	-2.84253	-0.982518	25,7040,9585,84678	ABL1,TGFB1,KIF20B,KDM2B	4/103
12_Member	GO Biological Processes	GO:0050731	positive regulation of peptidyl-tyrosine phosphorylation	-2.77446	-0.931432	25,941,7040,7157,7448	ABL1,CD80,TGFB1,TP53,VTN	5/181
12_Member	GO Biological Processes	GO:0001934	positive regulation of protein phosphorylation	-2.68605	-0.862533	25,941,2147,2321,7040,7157,7448,8795,9212,345611	ABL1,CD80,F2,FLT1,TGFB1,TP53,VTN,TNFRSF10B,AURKB,IRGM	10/714
12_Member	GO Biological Processes	GO:0002696	positive regulation of leukocyte activation	-2.6737	-0.855778	25,941,7040,10524,57181,79915,345611	ABL1,CD80,TGFB1,KAT5,SLC39A10,ATAD5,IRGM	7/378
12_Member	GO Biological Processes	GO:0002694	regulation of leukocyte activation	-2.6628	-0.854575	25,941,2335,3162,7040,10524,57181,79915,345611	ABL1,CD80,FN1,HMOX1,TGFB1,KAT5,SLC39A10,ATAD5,IRGM	9/600
12_Member	GO Biological Processes	GO:0016236	macroautophagy	-2.6144	-0.817376	3162,7040,7157,54463,345611	HMOX1,TGFB1,TP53,RETREG1,IRGM	5/197
12_Member	GO Biological Processes	GO:0001838	embryonic epithelial tube formation	-2.56136	-0.782178	25,7040,9585,84678	ABL1,TGFB1,KIF20B,KDM2B	4/123
12_Member	GO Biological Processes	GO:0007178	transmembrane receptor protein serine/threonine kinase signaling pathway	-2.54	-0.767779	25,4052,7040,7157,255743	ABL1,LTBP1,TGFB1,TP53,NPNT	5/205
12_Member	GO Biological Processes	GO:0007167	enzyme-linked receptor protein signaling pathway	-2.531	-0.759932	25,2321,4052,7040,7157,10016,51232,140710,255743	ABL1,FLT1,LTBP1,TGFB1,TP53,PDCD6,CRIM1,SOGA1,NPNT	9/628
12_Member	GO Biological Processes	GO:0051347	positive regulation of transferase activity	-2.47119	-0.72142	25,2147,2321,4609,7040,8795,9212,345611	ABL1,F2,FLT1,MYC,TGFB1,TNFRSF10B,AURKB,IRGM	8/523
12_Member	GO Biological Processes	GO:0072175	epithelial tube formation	-2.46308	-0.714403	25,7040,9585,84678	ABL1,TGFB1,KIF20B,KDM2B	4/131
12_Member	GO Biological Processes	GO:0042327	positive regulation of phosphorylation	-2.44006	-0.698471	25,941,2147,2321,7040,7157,7448,8795,9212,345611	ABL1,CD80,F2,FLT1,TGFB1,TP53,VTN,TNFRSF10B,AURKB,IRGM	10/773
12_Member	GO Biological Processes	GO:0060562	epithelial tube morphogenesis	-2.43846	-0.698425	25,4609,7040,9585,84678,255743	ABL1,MYC,TGFB1,KIF20B,KDM2B,NPNT	6/312
12_Member	GO Biological Processes	GO:1903706	regulation of hemopoiesis	-2.43241	-0.694511	25,182,941,2101,4609,7040,10524	ABL1,JAG1,CD80,ESRRA,MYC,TGFB1,KAT5	7/418
12_Member	GO Biological Processes	GO:0006914	autophagy	-2.42496	-0.690246	25,3162,7040,7157,54463,345611	ABL1,HMOX1,TGFB1,TP53,RETREG1,IRGM	6/314
12_Member	GO Biological Processes	GO:0061919	process utilizing autophagic mechanism	-2.42496	-0.690246	25,3162,7040,7157,54463,345611	ABL1,HMOX1,TGFB1,TP53,RETREG1,IRGM	6/314
12_Member	GO Biological Processes	GO:1902105	regulation of leukocyte differentiation	-2.37204	-0.653293	25,941,2101,4609,7040,10524	ABL1,CD80,ESRRA,MYC,TGFB1,KAT5	6/322
12_Member	GO Biological Processes	GO:0045911	positive regulation of DNA recombination	-2.35572	-0.640634	7040,10524,79915	TGFB1,KAT5,ATAD5	3/70
12_Member	GO Biological Processes	GO:0009792	embryo development ending in birth or egg hatching	-2.34777	-0.6367	25,2395,5460,7040,7157,9585,10016,10524,84678	ABL1,FXN,POU5F1,TGFB1,TP53,KIF20B,PDCD6,KAT5,KDM2B	9/670
12_Member	GO Biological Processes	GO:0051251	positive regulation of lymphocyte activation	-2.33979	-0.630373	25,941,7040,10524,57181,79915	ABL1,CD80,TGFB1,KAT5,SLC39A10,ATAD5	6/327
12_Member	GO Biological Processes	GO:0016331	morphogenesis of embryonic epithelium	-2.30657	-0.60645	25,7040,9585,84678	ABL1,TGFB1,KIF20B,KDM2B	4/145
12_Member	GO Biological Processes	GO:0035148	tube formation	-2.28564	-0.593185	25,7040,9585,84678	ABL1,TGFB1,KIF20B,KDM2B	4/147
12_Member	GO Biological Processes	GO:0048729	tissue morphogenesis	-2.26287	-0.579097	25,182,4609,7040,9585,30008,84678,255743	ABL1,JAG1,MYC,TGFB1,KIF20B,EFEMP2,KDM2B,NPNT	8/567
12_Member	GO Biological Processes	GO:0002009	morphogenesis of an epithelium	-2.2497	-0.572317	25,182,4609,7040,9585,84678,255743	ABL1,JAG1,MYC,TGFB1,KIF20B,KDM2B,NPNT	7/452
12_Member	GO Biological Processes	GO:0050730	regulation of peptidyl-tyrosine phosphorylation	-2.17049	-0.512129	25,941,7040,7157,7448	ABL1,CD80,TGFB1,TP53,VTN	5/251
12_Member	GO Biological Processes	GO:0071216	cellular response to biotic stimulus	-2.16339	-0.508562	25,941,7040,7157,345611	ABL1,CD80,TGFB1,TP53,IRGM	5/252
12_Member	GO Biological Processes	GO:0050871	positive regulation of B cell activation	-2.15	-0.497796	7040,57181,79915	TGFB1,SLC39A10,ATAD5	3/83
12_Member	GO Biological Processes	GO:0071560	cellular response to transforming growth factor beta stimulus	-2.13853	-0.491537	25,7040,7157,255743	ABL1,TGFB1,TP53,NPNT	4/162
12_Member	WikiPathways	WP4298	Acute viral myocarditis	-2.1076	-0.475044	25,941,7040	ABL1,CD80,TGFB1	3/86
12_Member	GO Biological Processes	GO:0071559	response to transforming growth factor beta	-2.07524	-0.454992	25,7040,7157,255743	ABL1,TGFB1,TP53,NPNT	4/169
12_Member	GO Biological Processes	GO:0071407	cellular response to organic cyclic compound	-2.02075	-0.416487	25,2101,6667,7035,7040,8644,10524	ABL1,ESRRA,SP1,TFPI,TGFB1,AKR1C3,KAT5	7/500
13_Summary	GO Biological Processes	GO:0071496	cellular response to external stimulus	-5.49266	-2.92226	3162,3676,4023,6667,6839,7157,8644,8795,10524,10631,2153,3607,7040	HMOX1,ITGA4,LPL,SP1,SUV39H1,TP53,AKR1C3,TNFRSF10B,KAT5,POSTN,F5,FOXK2,TGFB1	13/-
13_Member	GO Biological Processes	GO:0071496	cellular response to external stimulus	-5.49266	-2.92226	3162,3676,4023,6667,6839,7157,8644,8795,10524,10631	HMOX1,ITGA4,LPL,SP1,SUV39H1,TP53,AKR1C3,TNFRSF10B,KAT5,POSTN	10/323
13_Member	GO Biological Processes	GO:0031668	cellular response to extracellular stimulus	-5.42548	-2.87626	3162,3676,4023,6667,6839,7157,8644,10524,10631	HMOX1,ITGA4,LPL,SP1,SUV39H1,TP53,AKR1C3,KAT5,POSTN	9/257
13_Member	GO Biological Processes	GO:0031669	cellular response to nutrient levels	-4.91344	-2.47042	3162,4023,6667,6839,7157,8644,10524,10631	HMOX1,LPL,SP1,SUV39H1,TP53,AKR1C3,KAT5,POSTN	8/226
13_Member	GO Biological Processes	GO:0009991	response to extracellular stimulus	-4.58137	-2.21508	2153,3162,3607,3676,4023,6667,6839,7157,8644,10524,10631	F5,HMOX1,FOXK2,ITGA4,LPL,SP1,SUV39H1,TP53,AKR1C3,KAT5,POSTN	11/501
13_Member	GO Biological Processes	GO:0031667	response to nutrient levels	-4.09	-1.83135	2153,3162,3607,4023,6667,6839,7157,8644,10524,10631	F5,HMOX1,FOXK2,LPL,SP1,SUV39H1,TP53,AKR1C3,KAT5,POSTN	10/471
13_Member	GO Biological Processes	GO:0042594	response to starvation	-3.33385	-1.32574	3607,6667,6839,7157,8644,10524	FOXK2,SP1,SUV39H1,TP53,AKR1C3,KAT5	6/208
13_Member	GO Biological Processes	GO:0031670	cellular response to nutrient	-3.22617	-1.24122	3162,4023,10631	HMOX1,LPL,POSTN	3/35
13_Member	GO Biological Processes	GO:0007584	response to nutrient	-3.15034	-1.182	2153,3162,4023,8644,10631	F5,HMOX1,LPL,AKR1C3,POSTN	5/149
13_Member	GO Biological Processes	GO:0009267	cellular response to starvation	-2.89439	-1.01418	6667,6839,7157,8644,10524	SP1,SUV39H1,TP53,AKR1C3,KAT5	5/170
13_Member	GO Biological Processes	GO:0042149	cellular response to glucose starvation	-2.82347	-0.967676	6839,7157,10524	SUV39H1,TP53,KAT5	3/48
13_Member	GO Biological Processes	GO:1901654	response to ketone	-2.54	-0.767779	2153,6667,7040,8644,10631	F5,SP1,TGFB1,AKR1C3,POSTN	5/205
14_Summary	GO Biological Processes	GO:0035239	tube morphogenesis	-5.38381	-2.84817	25,182,2321,2335,3162,3339,4609,7040,9585,10016,30008,84678,93974,255743,7157,7448,57181	ABL1,JAG1,FLT1,FN1,HMOX1,HSPG2,MYC,TGFB1,KIF20B,PDCD6,EFEMP2,KDM2B,ATP5IF1,NPNT,TP53,VTN,SLC39A10	17/-
14_Member	GO Biological Processes	GO:0035239	tube morphogenesis	-5.38381	-2.84817	25,182,2321,2335,3162,3339,4609,7040,9585,10016,30008,84678,93974,255743	ABL1,JAG1,FLT1,FN1,HMOX1,HSPG2,MYC,TGFB1,KIF20B,PDCD6,EFEMP2,KDM2B,ATP5IF1,NPNT	14/679
14_Member	WikiPathways	WP4239	Epithelial to mesenchymal transition in colorectal cancer	-3.91785	-1.72158	182,2335,7040,7157,7448,10016	JAG1,FN1,TGFB1,TP53,VTN,PDCD6	6/162
14_Member	GO Biological Processes	GO:0001525	angiogenesis	-3.70491	-1.56854	182,2321,2335,3162,3339,7040,10016,93974	JAG1,FLT1,FN1,HMOX1,HSPG2,TGFB1,PDCD6,ATP5IF1	8/336
14_Member	GO Biological Processes	GO:0048514	blood vessel morphogenesis	-3.68524	-1.55153	182,2321,2335,3162,3339,7040,10016,30008,93974	JAG1,FLT1,FN1,HMOX1,HSPG2,TGFB1,PDCD6,EFEMP2,ATP5IF1	9/430
14_Member	GO Biological Processes	GO:0001568	blood vessel development	-3.1075	-1.15688	182,2321,2335,3162,3339,7040,10016,30008,93974	JAG1,FLT1,FN1,HMOX1,HSPG2,TGFB1,PDCD6,EFEMP2,ATP5IF1	9/517
14_Member	GO Biological Processes	GO:0001944	vasculature development	-2.99777	-1.08854	182,2321,2335,3162,3339,7040,10016,30008,93974	JAG1,FLT1,FN1,HMOX1,HSPG2,TGFB1,PDCD6,EFEMP2,ATP5IF1	9/536
14_Member	GO Biological Processes	GO:0048762	mesenchymal cell differentiation	-2.87193	-0.999042	182,2335,7040,10016,57181	JAG1,FN1,TGFB1,PDCD6,SLC39A10	5/172
14_Member	GO Biological Processes	GO:0060485	mesenchyme development	-2.23598	-0.561036	182,2335,7040,10016,57181	JAG1,FN1,TGFB1,PDCD6,SLC39A10	5/242
14_Member	GO Biological Processes	GO:0014032	neural crest cell development	-2.20926	-0.542849	182,2335,10016	JAG1,FN1,PDCD6	3/79
14_Member	GO Biological Processes	GO:0001837	epithelial to mesenchymal transition	-2.15	-0.497796	7040,10016,57181	TGFB1,PDCD6,SLC39A10	3/83
14_Member	GO Biological Processes	GO:0048864	stem cell development	-2.12155	-0.483951	182,2335,10016	JAG1,FN1,PDCD6	3/85
14_Member	GO Biological Processes	GO:0014033	neural crest cell differentiation	-2.02756	-0.420939	182,2335,10016	JAG1,FN1,PDCD6	3/92
15_Summary	GO Biological Processes	GO:0010543	regulation of platelet activation	-5.33479	-2.81231	2147,5270,5341,11117,114897,941,2335,3162	F2,SERPINE2,PLEK,EMILIN1,C1QTNF1,CD80,FN1,HMOX1	8/-
15_Member	GO Biological Processes	GO:0010543	regulation of platelet activation	-5.33479	-2.81231	2147,5270,5341,11117,114897	F2,SERPINE2,PLEK,EMILIN1,C1QTNF1	5/52
15_Member	GO Biological Processes	GO:0010544	negative regulation of platelet activation	-4.03187	-1.80059	2147,5270,114897	F2,SERPINE2,C1QTNF1	3/19
15_Member	GO Biological Processes	GO:0050866	negative regulation of cell activation	-3.9986	-1.77705	941,2147,2335,3162,5270,11117,114897	CD80,F2,FN1,HMOX1,SERPINE2,EMILIN1,C1QTNF1	7/226
15_Member	GO Biological Processes	GO:0090330	regulation of platelet aggregation	-3.4261	-1.38964	5270,11117,114897	SERPINE2,EMILIN1,C1QTNF1	3/30
15_Member	GO Biological Processes	GO:0034110	regulation of homotypic cell-cell adhesion	-3.15464	-1.18447	5270,11117,114897	SERPINE2,EMILIN1,C1QTNF1	3/37
16_Summary	GO Biological Processes	GO:1903055	positive regulation of extracellular matrix organization	-5.05866	-2.57343	25,7040,11117,30008,2321,2817,2147,182,941,3676,3162,10524,22801	ABL1,TGFB1,EMILIN1,EFEMP2,FLT1,GPC1,F2,JAG1,CD80,ITGA4,HMOX1,KAT5,ITGA11	13/-
16_Member	GO Biological Processes	GO:1903055	positive regulation of extracellular matrix organization	-5.05866	-2.57343	25,7040,11117,30008	ABL1,TGFB1,EMILIN1,EFEMP2	4/28
16_Member	Canonical Pathways	M33	PID GLYPICAN 1PATHWAY	-3.56402	-1.48705	2321,2817,7040	FLT1,GPC1,TGFB1	3/27
16_Member	GO Biological Processes	GO:0085029	extracellular matrix assembly	-3.47036	-1.42284	7040,11117,30008	TGFB1,EMILIN1,EFEMP2	3/29
16_Member	GO Biological Processes	GO:0090218	positive regulation of lipid kinase activity	-3.15464	-1.18447	2147,2321,7040	F2,FLT1,TGFB1	3/37
16_Member	GO Biological Processes	GO:0003180	aortic valve morphogenesis	-3.12041	-1.16135	182,7040,11117	JAG1,TGFB1,EMILIN1	3/38
16_Member	GO Biological Processes	GO:0032965	regulation of collagen biosynthetic process	-3.02325	-1.10926	2147,7040,11117	F2,TGFB1,EMILIN1	3/41
16_Member	GO Biological Processes	GO:0003176	aortic valve development	-2.96264	-1.06278	182,7040,11117	JAG1,TGFB1,EMILIN1	3/43
16_Member	GO Biological Processes	GO:0010712	regulation of collagen metabolic process	-2.87718	-1.00137	2147,7040,11117	F2,TGFB1,EMILIN1	3/46
16_Member	GO Biological Processes	GO:1905314	semi-lunar valve development	-2.85002	-0.984332	182,7040,11117	JAG1,TGFB1,EMILIN1	3/47
16_Member	KEGG Pathway	hsa04672	Intestinal immune network for IgA production	-2.79752	-0.950489	941,3676,7040	CD80,ITGA4,TGFB1	3/49
16_Member	GO Biological Processes	GO:0043550	regulation of lipid kinase activity	-2.6305	-0.830947	2147,2321,7040	F2,FLT1,TGFB1	3/56
16_Member	GO Biological Processes	GO:0003179	heart valve morphogenesis	-2.52453	-0.759166	182,7040,11117	JAG1,TGFB1,EMILIN1	3/61
16_Member	GO Biological Processes	GO:0002704	negative regulation of leukocyte mediated immunity	-2.37327	-0.653293	941,3162,7040	CD80,HMOX1,TGFB1	3/69
16_Member	GO Biological Processes	GO:0003170	heart valve development	-2.32145	-0.616342	182,7040,11117	JAG1,TGFB1,EMILIN1	3/72
16_Member	GO Biological Processes	GO:0045834	positive regulation of lipid metabolic process	-2.18573	-0.525596	2147,2321,7040,10524	F2,FLT1,TGFB1,KAT5	4/157
16_Member	KEGG Pathway	hsa05410	Hypertrophic cardiomyopathy	-2.05357	-0.440612	3676,7040,22801	ITGA4,TGFB1,ITGA11	3/90
16_Member	KEGG Pathway	hsa05323	Rheumatoid arthritis	-2.01479	-0.411306	941,2321,7040	CD80,FLT1,TGFB1	3/93
17_Summary	GO Biological Processes	GO:0097193	intrinsic apoptotic signaling pathway	-4.93654	-2.48429	25,3162,6326,7157,8795,56616,79915,2968,3835,4609,6839,10463,10524,29128,84266,84303,157570,7040,10016,4512,5270,84678,4998,5001,3024,2395,6667,941,182,5803,10857,64856	ABL1,HMOX1,SCN2A,TP53,TNFRSF10B,DIABLO,ATAD5,GTF2H4,KIF22,MYC,SUV39H1,SLC30A9,KAT5,UHRF1,ALKBH7,CHCHD6,ESCO2,TGFB1,PDCD6,COX1,SERPINE2,KDM2B,ORC1,ORC5,H1-1,FXN,SP1,CD80,JAG1,PTPRZ1,PGRMC1,VWA1	32/-
17_Member	GO Biological Processes	GO:0097193	intrinsic apoptotic signaling pathway	-4.93654	-2.48429	25,3162,6326,7157,8795,56616,79915	ABL1,HMOX1,SCN2A,TP53,TNFRSF10B,DIABLO,ATAD5	7/161
17_Member	GO Biological Processes	GO:0006974	DNA damage response	-4.87717	-2.44769	25,2968,3162,3835,4609,6839,7157,10463,10524,29128,79915,84266,84303,157570	ABL1,GTF2H4,HMOX1,KIF22,MYC,SUV39H1,TP53,SLC30A9,KAT5,UHRF1,ATAD5,ALKBH7,CHCHD6,ESCO2	14/753
17_Member	GO Biological Processes	GO:0097190	apoptotic signaling pathway	-4.77295	-2.36391	25,3162,6326,7040,7157,8795,10016,56616,79915	ABL1,HMOX1,SCN2A,TGFB1,TP53,TNFRSF10B,PDCD6,DIABLO,ATAD5	9/310
17_Member	GO Biological Processes	GO:0006289	nucleotide-excision repair	-3.76075	-1.61359	2968,7157,10463,10524	GTF2H4,TP53,SLC30A9,KAT5	4/59
17_Member	GO Biological Processes	GO:0008630	intrinsic apoptotic signaling pathway in response to DNA damage	-3.40414	-1.37573	25,3162,7157,79915	ABL1,HMOX1,TP53,ATAD5	4/73
17_Member	GO Biological Processes	GO:0030902	hindbrain development	-3.0732	-1.13296	25,4512,5270,7157,84678	ABL1,COX1,SERPINE2,TP53,KDM2B	5/155
17_Member	GO Biological Processes	GO:0006259	DNA metabolic process	-2.9303	-1.03658	25,2968,3835,4998,5001,7157,10463,10524,29128,79915,157570	ABL1,GTF2H4,KIF22,ORC1,ORC5,TP53,SLC30A9,KAT5,UHRF1,ATAD5,ESCO2	11/780
17_Member	GO Biological Processes	GO:0051402	neuron apoptotic process	-2.92245	-1.03629	25,6326,7157,56616	ABL1,SCN2A,TP53,DIABLO	4/98
17_Member	GO Biological Processes	GO:0070997	neuron death	-2.87397	-0.999624	25,6326,7157,56616	ABL1,SCN2A,TP53,DIABLO	4/101
17_Member	GO Biological Processes	GO:0021549	cerebellum development	-2.81176	-0.960131	25,4512,5270,7157	ABL1,COX1,SERPINE2,TP53	4/105
17_Member	GO Biological Processes	GO:0045910	negative regulation of DNA recombination	-2.77213	-0.931432	25,3024,10524	ABL1,H1-1,KAT5	3/50
17_Member	GO Biological Processes	GO:0006979	response to oxidative stress	-2.6931	-0.868289	25,2395,3162,4512,6667,7157,56616	ABL1,FXN,HMOX1,COX1,SP1,TP53,DIABLO	7/375
17_Member	GO Biological Processes	GO:0062197	cellular response to chemical stress	-2.67014	-0.855182	25,2395,3162,6326,7157,56616	ABL1,FXN,HMOX1,SCN2A,TP53,DIABLO	6/280
17_Member	GO Biological Processes	GO:0022037	metencephalon development	-2.66718	-0.855182	25,4512,5270,7157	ABL1,COX1,SERPINE2,TP53	4/115
17_Member	WikiPathways	WP3959	DNA IR-double strand breaks and cellular response via ATM	-2.65293	-0.848441	25,7157,10524	ABL1,TP53,KAT5	3/55
17_Member	GO Biological Processes	GO:0006281	DNA repair	-2.57384	-0.787571	25,2968,3835,7157,10463,10524,29128,157570	ABL1,GTF2H4,KIF22,TP53,SLC30A9,KAT5,UHRF1,ESCO2	8/503
17_Member	Canonical Pathways	M261	PID P53 REGULATION PATHWAY	-2.56574	-0.783029	25,7157,10524	ABL1,TP53,KAT5	3/59
17_Member	GO Biological Processes	GO:0090398	cellular senescence	-2.50447	-0.746974	25,7157,10524	ABL1,TP53,KAT5	3/62
17_Member	GO Biological Processes	GO:0032663	regulation of interleukin-2 production	-2.48476	-0.731697	25,941,10524	ABL1,CD80,KAT5	3/63
17_Member	GO Biological Processes	GO:0042770	signal transduction in response to DNA damage	-2.37142	-0.653293	25,7157,10524,79915	ABL1,TP53,KAT5,ATAD5	4/139
17_Member	GO Biological Processes	GO:0034599	cellular response to oxidative stress	-2.32807	-0.621748	25,2395,3162,7157,56616	ABL1,FXN,HMOX1,TP53,DIABLO	5/230
17_Member	GO Biological Processes	GO:0051053	negative regulation of DNA metabolic process	-2.29607	-0.599365	25,3024,7157,10524	ABL1,H1-1,TP53,KAT5	4/146
17_Member	Reactome Gene Sets	R-HSA-5693565	Recruitment and ATM-mediated phosphorylation of repair and signaling proteins at DNA double strand breaks	-2.24016	-0.563696	25,7157,10524	ABL1,TP53,KAT5	3/77
17_Member	Reactome Gene Sets	R-HSA-5693606	DNA Double Strand Break Response	-2.2246	-0.553648	25,7157,10524	ABL1,TP53,KAT5	3/78
17_Member	GO Biological Processes	GO:2000736	regulation of stem cell differentiation	-2.20926	-0.542849	25,182,10524	ABL1,JAG1,KAT5	3/79
17_Member	Canonical Pathways	M66	PID MYC ACTIV PATHWAY	-2.20926	-0.542849	4609,7157,10524	MYC,TP53,KAT5	3/79
17_Member	Reactome Gene Sets	R-HSA-2559586	DNA Damage/Telomere Stress Induced Senescence	-2.20926	-0.542849	3024,7157,10524	H1-1,TP53,KAT5	3/79
17_Member	GO Biological Processes	GO:0002520	immune system development	-2.12929	-0.488303	25,7040,7157,79915	ABL1,TGFB1,TP53,ATAD5	4/163
17_Member	GO Biological Processes	GO:0007610	behavior	-2.07565	-0.454992	25,2395,5270,5803,6326,7157,10857,64856	ABL1,FXN,SERPINE2,PTPRZ1,SCN2A,TP53,PGRMC1,VWA1	8/611
17_Member	GO Biological Processes	GO:0072331	signal transduction by p53 class mediator	-2.06682	-0.45109	7157,10524,79915	TP53,KAT5,ATAD5	3/89
18_Summary	Canonical Pathways	M165	PID SYNDECAN 4 PATHWAY	-4.8204	-2.40126	2147,2335,5340,7035,5091,6667,2244,941,2321,5270,2395,84678,375790	F2,FN1,PLG,TFPI,PC,SP1,FGB,CD80,FLT1,SERPINE2,FXN,KDM2B,AGRN	13/-
18_Member	Canonical Pathways	M165	PID SYNDECAN 4 PATHWAY	-4.8204	-2.40126	2147,2335,5340,7035	F2,FN1,PLG,TFPI	4/32
18_Member	GO Biological Processes	GO:0051702	biological process involved in interaction with symbiont	-3.61434	-1.51064	2147,2335,5091,5340,6667	F2,FN1,PC,PLG,SP1	5/118
18_Member	Reactome Gene Sets	R-HSA-76009	Platelet Aggregation (Plug Formation)	-3.08714	-1.1417	2147,2244,2335	F2,FGB,FN1	3/39
18_Member	Canonical Pathways	M92	PID ANGIOPOIETIN RECEPTOR PATHWAY	-2.79752	-0.950489	2147,2335,5340	F2,FN1,PLG	3/49
18_Member	GO Biological Processes	GO:0044403	biological process involved in symbiotic interaction	-2.74929	-0.911273	941,2147,2335,5091,5340,6667	CD80,F2,FN1,PC,PLG,SP1	6/270
18_Member	GO Biological Processes	GO:0014066	regulation of phosphatidylinositol 3-kinase signaling	-2.68099	-0.860063	2147,2321,2335,5270	F2,FLT1,FN1,SERPINE2	4/114
18_Member	GO Biological Processes	GO:0014068	positive regulation of phosphatidylinositol 3-kinase signaling	-2.13568	-0.49041	2147,2321,2335	F2,FLT1,FN1	3/84
18_Member	GO Biological Processes	GO:0030307	positive regulation of cell growth	-2.12929	-0.488303	2147,2335,2395,84678	F2,FN1,FXN,KDM2B	4/163
18_Member	GO Biological Processes	GO:0045927	positive regulation of growth	-2.12841	-0.488278	2147,2335,2395,84678,375790	F2,FN1,FXN,KDM2B,AGRN	5/257
19_Summary	GO Biological Processes	GO:0030335	positive regulation of cell migration	-4.78723	-2.37317	25,2321,2335,3162,3676,3912,6667,7040,7448,9585,10016,646960,5460,7157,84678,93974,11117,3339,9212	ABL1,FLT1,FN1,HMOX1,ITGA4,LAMB1,SP1,TGFB1,VTN,KIF20B,PDCD6,PRSS56,POU5F1,TP53,KDM2B,ATP5IF1,EMILIN1,HSPG2,AURKB	19/-
19_Member	GO Biological Processes	GO:0030335	positive regulation of cell migration	-4.78723	-2.37317	25,2321,2335,3162,3676,3912,6667,7040,7448,9585,10016,646960	ABL1,FLT1,FN1,HMOX1,ITGA4,LAMB1,SP1,TGFB1,VTN,KIF20B,PDCD6,PRSS56	12/568
19_Member	GO Biological Processes	GO:2000147	positive regulation of cell motility	-4.60384	-2.23301	25,2321,2335,3162,3676,3912,6667,7040,7448,9585,10016,646960	ABL1,FLT1,FN1,HMOX1,ITGA4,LAMB1,SP1,TGFB1,VTN,KIF20B,PDCD6,PRSS56	12/593
19_Member	GO Biological Processes	GO:0040017	positive regulation of locomotion	-4.49839	-2.14983	25,2321,2335,3162,3676,3912,6667,7040,7448,9585,10016,646960	ABL1,FLT1,FN1,HMOX1,ITGA4,LAMB1,SP1,TGFB1,VTN,KIF20B,PDCD6,PRSS56	12/608
19_Member	GO Biological Processes	GO:0048598	embryonic morphogenesis	-3.99851	-1.77705	25,2321,2335,3676,3912,5460,7040,7157,7448,9585,84678	ABL1,FLT1,FN1,ITGA4,LAMB1,POU5F1,TGFB1,TP53,VTN,KIF20B,KDM2B	11/582
19_Member	GO Biological Processes	GO:0001936	regulation of endothelial cell proliferation	-3.60501	-1.50931	2321,3162,3676,6667,10016,93974	FLT1,HMOX1,ITGA4,SP1,PDCD6,ATP5IF1	6/185
19_Member	GO Biological Processes	GO:0045766	positive regulation of angiogenesis	-3.60501	-1.50931	25,2321,3162,6667,10016,11117	ABL1,FLT1,HMOX1,SP1,PDCD6,EMILIN1	6/185
19_Member	GO Biological Processes	GO:1904018	positive regulation of vasculature development	-3.60501	-1.50931	25,2321,3162,6667,10016,11117	ABL1,FLT1,HMOX1,SP1,PDCD6,EMILIN1	6/185
19_Member	GO Biological Processes	GO:0010595	positive regulation of endothelial cell migration	-3.40479	-1.37573	25,3162,6667,7040,10016	ABL1,HMOX1,SP1,TGFB1,PDCD6	5/131
19_Member	GO Biological Processes	GO:0043536	positive regulation of blood vessel endothelial cell migration	-3.35935	-1.33918	25,3162,6667,7040	ABL1,HMOX1,SP1,TGFB1	4/75
19_Member	GO Biological Processes	GO:0045765	regulation of angiogenesis	-2.86275	-0.991311	25,2321,3162,3339,6667,10016,11117	ABL1,FLT1,HMOX1,HSPG2,SP1,PDCD6,EMILIN1	7/350
19_Member	GO Biological Processes	GO:0010634	positive regulation of epithelial cell migration	-2.8279	-0.969297	25,3162,6667,7040,10016	ABL1,HMOX1,SP1,TGFB1,PDCD6	5/176
19_Member	GO Biological Processes	GO:1901342	regulation of vasculature development	-2.82068	-0.966276	25,2321,3162,3339,6667,10016,11117	ABL1,FLT1,HMOX1,HSPG2,SP1,PDCD6,EMILIN1	7/356
19_Member	GO Biological Processes	GO:1905562	regulation of vascular endothelial cell proliferation	-2.72297	-0.892923	2321,3676,6667	FLT1,ITGA4,SP1	3/52
19_Member	GO Biological Processes	GO:0001938	positive regulation of endothelial cell proliferation	-2.66718	-0.855182	3162,3676,6667,10016	HMOX1,ITGA4,SP1,PDCD6	4/115
19_Member	GO Biological Processes	GO:0010594	regulation of endothelial cell migration	-2.31232	-0.608202	25,3162,6667,7040,10016	ABL1,HMOX1,SP1,TGFB1,PDCD6	5/232
19_Member	GO Biological Processes	GO:0043535	regulation of blood vessel endothelial cell migration	-2.23473	-0.561036	25,3162,6667,7040	ABL1,HMOX1,SP1,TGFB1	4/152
19_Member	GO Biological Processes	GO:0051098	regulation of binding	-2.09701	-0.466122	25,3162,3676,7040,7448,9212	ABL1,HMOX1,ITGA4,TGFB1,VTN,AURKB	6/368
20_Summary	WikiPathways	WP4922	Mitochondrial complex IV assembly	-4.71309	-2.31878	1350,4512,51241,80775,3162,25,4708,8644,7157,93974,4609,2395,6667,7040,6908,3024,4801,10524,10479,57181	COX7C,COX1,COX16,TMEM177,HMOX1,ABL1,NDUFB2,AKR1C3,TP53,ATP5IF1,MYC,FXN,SP1,TGFB1,TBP,H1-1,NFYB,KAT5,SLC9A6,SLC39A10	20/-
20_Member	WikiPathways	WP4922	Mitochondrial complex IV assembly	-4.71309	-2.31878	1350,4512,51241,80775	COX7C,COX1,COX16,TMEM177	4/34
20_Member	Reactome Gene Sets	R-HSA-9707564	Cytoprotection by HMOX1	-3.62373	-1.51573	1350,3162,4512,51241	COX7C,HMOX1,COX1,COX16	4/64
20_Member	KEGG Pathway	hsa05208	Chemical carcinogenesis - reactive oxygen species	-3.17511	-1.19946	25,1350,3162,4512,4708,8644	ABL1,COX7C,HMOX1,COX1,NDUFB2,AKR1C3	6/223
20_Member	Reactome Gene Sets	R-HSA-5628897	TP53 Regulates Metabolic Genes	-3.11546	-1.16135	1350,4512,7157,51241	COX7C,COX1,TP53,COX16	4/87
20_Member	Reactome Gene Sets	R-HSA-611105	Respiratory electron transport	-2.84253	-0.982518	1350,4512,4708,51241	COX7C,COX1,NDUFB2,COX16	4/103
20_Member	WikiPathways	WP111	Electron transport chain: OXPHOS system in mitochondria	-2.84253	-0.982518	1350,4512,4708,93974	COX7C,COX1,NDUFB2,ATP5IF1	4/103
20_Member	Reactome Gene Sets	R-HSA-9711123	Cellular response to chemical stress	-2.59547	-0.803211	1350,3162,4512,4609,51241	COX7C,HMOX1,COX1,MYC,COX16	5/199
20_Member	GO Biological Processes	GO:0006119	oxidative phosphorylation	-2.58707	-0.79827	1350,2395,4512,4708	COX7C,FXN,COX1,NDUFB2	4/121
20_Member	KEGG Pathway	hsa05415	Diabetic cardiomyopathy	-2.55827	-0.780255	1350,4512,4708,6667,7040	COX7C,COX1,NDUFB2,SP1,TGFB1	5/203
20_Member	Reactome Gene Sets	R-HSA-163200	Respiratory electron transport, ATP synthesis by chemiosmotic coupling, and heat production by uncoupling proteins.	-2.51134	-0.750492	1350,4512,4708,51241	COX7C,COX1,NDUFB2,COX16	4/127
20_Member	KEGG Pathway	hsa05016	Huntington disease	-2.4796	-0.727636	1350,4512,4708,6667,6908,7157	COX7C,COX1,NDUFB2,SP1,TBP,TP53	6/306
20_Member	Reactome Gene Sets	R-HSA-2262752	Cellular responses to stress	-2.38175	-0.658502	1350,3024,3162,4512,4609,4801,6667,7157,10524,51241	COX7C,H1-1,HMOX1,COX1,MYC,NFYB,SP1,TP53,KAT5,COX16	10/788
20_Member	WikiPathways	WP4396	Nonalcoholic fatty liver disease	-2.20511	-0.540502	1350,4512,4708,7040	COX7C,COX1,NDUFB2,TGFB1	4/155
20_Member	KEGG Pathway	hsa04932	Non-alcoholic fatty liver disease	-2.20511	-0.540502	1350,4512,4708,7040	COX7C,COX1,NDUFB2,TGFB1	4/155
20_Member	GO Biological Processes	GO:0009060	aerobic respiration	-2.12929	-0.488303	1350,2395,4512,4708	COX7C,FXN,COX1,NDUFB2	4/163
20_Member	KEGG Pathway	hsa04260	Cardiac muscle contraction	-2.09383	-0.465429	1350,4512,10479	COX7C,COX1,SLC9A6	3/87
20_Member	GO Biological Processes	GO:0015980	energy derivation by oxidation of organic compounds	-2.08083	-0.457088	1350,2395,4512,4708,7157	COX7C,FXN,COX1,NDUFB2,TP53	5/264
20_Member	GO Biological Processes	GO:0006091	generation of precursor metabolites and energy	-2.0752	-0.454992	1350,2395,4512,4708,7157,93974	COX7C,FXN,COX1,NDUFB2,TP53,ATP5IF1	6/372
20_Member	KEGG Pathway	hsa05012	Parkinson disease	-2.06753	-0.45109	1350,4512,4708,7157,57181	COX7C,COX1,NDUFB2,TP53,SLC39A10	5/266
20_Member	GO Biological Processes	GO:0019646	aerobic electron transport chain	-2.06682	-0.45109	1350,4512,4708	COX7C,COX1,NDUFB2	3/89
20_Member	GO Biological Processes	GO:0042773	ATP synthesis coupled electron transport	-2.00217	-0.401804	1350,4512,4708	COX7C,COX1,NDUFB2	3/94
20_Member	GO Biological Processes	GO:0042775	mitochondrial ATP synthesis coupled electron transport	-2.00217	-0.401804	1350,4512,4708	COX7C,COX1,NDUFB2	3/94

## Sheet: Δ9 D4 DOWN
GroupID	Category	Term	Description	LogP	Log(q-value)	Genes	Symbols	InTerm_InList
1_Summary	GO Biological Processes	GO:0097435	supramolecular fiber organization	-19.6593	-15.3108	226,408,1072,1073,1465,1832,2280,2620,2670,3854,3855,3856,3860,3861,3868,3872,3880,4134,4542,4629,5074,5357,5358,6622,7428,8936,9564,10152,10486,10487,10552,10677,11075,11344,23242,25802,30011,51673,57698,80774,83481,144501,1398,3993,4287,5058,5217,5901,8572,26499,29085,51421,54961,64236,90627,54874	ALDOA,ARRB1,CFL1,CFL2,CSRP1,DSP,FKBP1A,GAS2,GFAP,KRT6B,KRT7,KRT8,KRT13,KRT14,KRT16,KRT17,KRT19,MAP4,MYO1F,MYH11,PAWR,PLS1,PLS3,SNCA,VHL,WASF1,BCAR1,ABI2,CAP2,CAP1,ARPC1A,AVIL,STMN2,TWF2,COBL,LMOD1,SH3KBP1,TPPP3,SHTN1,LIMD2,EPPK1,KRT80,CRK,LLGL2,ATXN3,PAK1,PFN2,RAN,PDLIM4,PLEK2,PHPT1,AMOTL2,SSH3,PDLIM2,STARD13,FNBP1L	56/-
1_Member	GO Biological Processes	GO:0097435	supramolecular fiber organization	-19.6593	-15.3108	226,408,1072,1073,1465,1832,2280,2620,2670,3854,3855,3856,3860,3861,3868,3872,3880,4134,4542,4629,5074,5357,5358,6622,7428,8936,9564,10152,10486,10487,10552,10677,11075,11344,23242,25802,30011,51673,57698,80774,83481,144501	ALDOA,ARRB1,CFL1,CFL2,CSRP1,DSP,FKBP1A,GAS2,GFAP,KRT6B,KRT7,KRT8,KRT13,KRT14,KRT16,KRT17,KRT19,MAP4,MYO1F,MYH11,PAWR,PLS1,PLS3,SNCA,VHL,WASF1,BCAR1,ABI2,CAP2,CAP1,ARPC1A,AVIL,STMN2,TWF2,COBL,LMOD1,SH3KBP1,TPPP3,SHTN1,LIMD2,EPPK1,KRT80	42/569
1_Member	GO Biological Processes	GO:0030036	actin cytoskeleton organization	-18.0516	-14.0041	226,408,1072,1073,1398,1465,2620,3856,3880,3993,4287,4542,4629,5058,5074,5217,5357,5358,5901,8572,8936,9564,10152,10486,10487,10552,10677,11344,23242,25802,26499,29085,30011,51421,54961,57698,64236,80774,90627	ALDOA,ARRB1,CFL1,CFL2,CRK,CSRP1,GAS2,KRT8,KRT19,LLGL2,ATXN3,MYO1F,MYH11,PAK1,PAWR,PFN2,PLS1,PLS3,RAN,PDLIM4,WASF1,BCAR1,ABI2,CAP2,CAP1,ARPC1A,AVIL,TWF2,COBL,LMOD1,PLEK2,PHPT1,SH3KBP1,AMOTL2,SSH3,SHTN1,PDLIM2,LIMD2,STARD13	39/536
1_Member	GO Biological Processes	GO:0030029	actin filament-based process	-17.2525	-13.381	226,408,1072,1073,1398,1465,2620,3856,3880,3993,4287,4542,4629,5058,5074,5217,5357,5358,5901,8572,8936,9564,10152,10486,10487,10552,10677,11344,23242,25802,26499,29085,30011,51421,54874,54961,57698,64236,80774,90627	ALDOA,ARRB1,CFL1,CFL2,CRK,CSRP1,GAS2,KRT8,KRT19,LLGL2,ATXN3,MYO1F,MYH11,PAK1,PAWR,PFN2,PLS1,PLS3,RAN,PDLIM4,WASF1,BCAR1,ABI2,CAP2,CAP1,ARPC1A,AVIL,TWF2,COBL,LMOD1,PLEK2,PHPT1,SH3KBP1,AMOTL2,FNBP1L,SSH3,SHTN1,PDLIM2,LIMD2,STARD13	40/597
1_Member	GO Biological Processes	GO:0007015	actin filament organization	-11.6394	-8.33225	226,408,1072,1073,2620,4542,5074,5357,5358,8936,9564,10152,10486,10487,10552,10677,11344,23242,25802,30011,57698,80774	ALDOA,ARRB1,CFL1,CFL2,GAS2,MYO1F,PAWR,PLS1,PLS3,WASF1,BCAR1,ABI2,CAP2,CAP1,ARPC1A,AVIL,TWF2,COBL,LMOD1,SH3KBP1,SHTN1,LIMD2	22/261
2_Summary	GO Biological Processes	GO:0055086	nucleobase-containing small molecule metabolic process	-16.7128	-12.9663	100,112,159,226,1728,2745,3251,3417,4190,4199,4351,4830,4831,4860,5144,5226,5238,5373,5901,6820,6888,7360,7378,9414,10135,10380,11165,11315,22934,23181,29925,51005,51727,55276,79717,84836,93100,132789,1152,2171,2224,3422,3613,3628,7167,8525,140838	ADA,ADCY6,ADSS2,ALDOA,NQO1,GLRX,HPRT1,IDH1,MDH1,ME1,MPI,NME1,NME2,PNP,PDE4D,PGD,PGM3,PMM2,RAN,SULT2B1,TALDO1,UGP2,UPP1,TJP2,NAMPT,BPNT1,NUDT3,PARK7,RPIA,DIP2A,GMPPB,AMDHD2,CMPK1,PGM2,PPCS,ABHD14B,NAPRT,GNPDA2,CKB,FABP5,FDPS,IDI1,IMPA2,INPP1,TPI1,DGKZ,NANP	47/-
2_Member	GO Biological Processes	GO:0055086	nucleobase-containing small molecule metabolic process	-16.7128	-12.9663	100,112,159,226,1728,2745,3251,3417,4190,4199,4351,4830,4831,4860,5144,5226,5238,5373,5901,6820,6888,7360,7378,9414,10135,10380,11165,11315,22934,23181,29925,51005,51727,55276,79717,84836,93100,132789	ADA,ADCY6,ADSS2,ALDOA,NQO1,GLRX,HPRT1,IDH1,MDH1,ME1,MPI,NME1,NME2,PNP,PDE4D,PGD,PGM3,PMM2,RAN,SULT2B1,TALDO1,UGP2,UPP1,TJP2,NAMPT,BPNT1,NUDT3,PARK7,RPIA,DIP2A,GMPPB,AMDHD2,CMPK1,PGM2,PPCS,ABHD14B,NAPRT,GNPDA2	38/555
2_Member	GO Biological Processes	GO:0009117	nucleotide metabolic process	-11.5388	-8.26943	100,112,159,226,1728,3251,3417,4190,4199,4830,4831,4860,5144,5226,5901,6820,6888,7378,9414,10135,10380,11165,11315,22934,23181,51727,79717,84836,93100	ADA,ADCY6,ADSS2,ALDOA,NQO1,HPRT1,IDH1,MDH1,ME1,NME1,NME2,PNP,PDE4D,PGD,RAN,SULT2B1,TALDO1,UPP1,TJP2,NAMPT,BPNT1,NUDT3,PARK7,RPIA,DIP2A,CMPK1,PPCS,ABHD14B,NAPRT	29/478
2_Member	GO Biological Processes	GO:0006753	nucleoside phosphate metabolic process	-11.3408	-8.1077	100,112,159,226,1728,3251,3417,4190,4199,4830,4831,4860,5144,5226,5901,6820,6888,7378,9414,10135,10380,11165,11315,22934,23181,51727,79717,84836,93100	ADA,ADCY6,ADSS2,ALDOA,NQO1,HPRT1,IDH1,MDH1,ME1,NME1,NME2,PNP,PDE4D,PGD,RAN,SULT2B1,TALDO1,UPP1,TJP2,NAMPT,BPNT1,NUDT3,PARK7,RPIA,DIP2A,CMPK1,PPCS,ABHD14B,NAPRT	29/487
2_Member	GO Biological Processes	GO:0072521	purine-containing compound metabolic process	-10.6676	-7.62011	100,112,159,226,1728,3251,3417,4190,4199,4830,4831,4860,5144,5226,5901,6820,6888,9414,10135,10380,11165,22934,23181,55276,79717,84836,93100	ADA,ADCY6,ADSS2,ALDOA,NQO1,HPRT1,IDH1,MDH1,ME1,NME1,NME2,PNP,PDE4D,PGD,RAN,SULT2B1,TALDO1,TJP2,NAMPT,BPNT1,NUDT3,RPIA,DIP2A,PGM2,PPCS,ABHD14B,NAPRT	27/450
2_Member	GO Biological Processes	GO:0006163	purine nucleotide metabolic process	-10.5902	-7.56386	100,112,159,226,1728,3251,3417,4190,4199,4830,4831,4860,5144,5226,5901,6820,6888,9414,10135,10380,11165,22934,23181,79717,84836,93100	ADA,ADCY6,ADSS2,ALDOA,NQO1,HPRT1,IDH1,MDH1,ME1,NME1,NME2,PNP,PDE4D,PGD,RAN,SULT2B1,TALDO1,TJP2,NAMPT,BPNT1,NUDT3,RPIA,DIP2A,PPCS,ABHD14B,NAPRT	26/420
2_Member	GO Biological Processes	GO:0019693	ribose phosphate metabolic process	-7.31346	-4.75023	100,112,159,226,3251,4830,4831,4860,5144,5901,6820,7378,9414,10380,11165,22934,23181,51727,79717,84836	ADA,ADCY6,ADSS2,ALDOA,HPRT1,NME1,NME2,PNP,PDE4D,RAN,SULT2B1,UPP1,TJP2,BPNT1,NUDT3,RPIA,DIP2A,CMPK1,PPCS,ABHD14B	20/369
2_Member	GO Biological Processes	GO:0090407	organophosphate biosynthetic process	-7.00498	-4.51974	100,112,159,226,1152,2171,2224,3251,3422,3613,3628,4199,4830,4831,4860,7167,7378,8525,10135,10380,23181,51727,79717,93100	ADA,ADCY6,ADSS2,ALDOA,CKB,FABP5,FDPS,HPRT1,IDI1,IMPA2,INPP1,ME1,NME1,NME2,PNP,TPI1,UPP1,DGKZ,NAMPT,BPNT1,DIP2A,CMPK1,PPCS,NAPRT	24/541
2_Member	GO Biological Processes	GO:0009259	ribonucleotide metabolic process	-6.79808	-4.35033	100,112,159,226,3251,4830,4831,4860,5144,5901,6820,7378,9414,10380,11165,23181,51727,79717,84836	ADA,ADCY6,ADSS2,ALDOA,HPRT1,NME1,NME2,PNP,PDE4D,RAN,SULT2B1,UPP1,TJP2,BPNT1,NUDT3,DIP2A,CMPK1,PPCS,ABHD14B	19/360
2_Member	GO Biological Processes	GO:0009165	nucleotide biosynthetic process	-5.9068	-3.65516	100,112,159,226,3251,4199,4830,4831,4860,7378,10135,23181,51727,79717,93100	ADA,ADCY6,ADSS2,ALDOA,HPRT1,ME1,NME1,NME2,PNP,UPP1,NAMPT,DIP2A,CMPK1,PPCS,NAPRT	15/263
2_Member	GO Biological Processes	GO:1901293	nucleoside phosphate biosynthetic process	-5.86582	-3.62107	100,112,159,226,3251,4199,4830,4831,4860,7378,10135,23181,51727,79717,93100	ADA,ADCY6,ADSS2,ALDOA,HPRT1,ME1,NME1,NME2,PNP,UPP1,NAMPT,DIP2A,CMPK1,PPCS,NAPRT	15/265
2_Member	GO Biological Processes	GO:0009150	purine ribonucleotide metabolic process	-5.80544	-3.57083	100,112,159,226,3251,4830,4831,4860,5144,5901,6820,9414,10380,11165,23181,79717,84836	ADA,ADCY6,ADSS2,ALDOA,HPRT1,NME1,NME2,PNP,PDE4D,RAN,SULT2B1,TJP2,BPNT1,NUDT3,DIP2A,PPCS,ABHD14B	17/341
2_Member	GO Biological Processes	GO:0072522	purine-containing compound biosynthetic process	-4.99599	-2.86754	100,112,159,226,3251,4830,4831,4860,10135,23181,55276,79717,93100	ADA,ADCY6,ADSS2,ALDOA,HPRT1,NME1,NME2,PNP,NAMPT,DIP2A,PGM2,PPCS,NAPRT	13/238
2_Member	GO Biological Processes	GO:1901137	carbohydrate derivative biosynthetic process	-4.6807	-2.61545	100,112,159,226,3251,4351,4830,4831,4860,5238,5373,7167,7378,23181,29925,51005,51727,55276,79717,132789,140838	ADA,ADCY6,ADSS2,ALDOA,HPRT1,MPI,NME1,NME2,PNP,PGM3,PMM2,TPI1,UPP1,DIP2A,GMPPB,AMDHD2,CMPK1,PGM2,PPCS,GNPDA2,NANP	21/594
2_Member	GO Biological Processes	GO:0009260	ribonucleotide biosynthetic process	-4.18937	-2.23175	100,112,159,226,3251,4830,4831,7378,23181,51727,79717	ADA,ADCY6,ADSS2,ALDOA,HPRT1,NME1,NME2,UPP1,DIP2A,CMPK1,PPCS	11/208
2_Member	GO Biological Processes	GO:0046390	ribose phosphate biosynthetic process	-4.06079	-2.12385	100,112,159,226,3251,4830,4831,7378,23181,51727,79717	ADA,ADCY6,ADSS2,ALDOA,HPRT1,NME1,NME2,UPP1,DIP2A,CMPK1,PPCS	11/215
2_Member	GO Biological Processes	GO:0006164	purine nucleotide biosynthetic process	-3.81917	-1.92849	100,112,159,226,3251,4830,4831,10135,23181,79717,93100	ADA,ADCY6,ADSS2,ALDOA,HPRT1,NME1,NME2,NAMPT,DIP2A,PPCS,NAPRT	11/229
2_Member	GO Biological Processes	GO:0009152	purine ribonucleotide biosynthetic process	-3.11659	-1.37333	100,112,159,226,3251,4830,4831,23181,79717	ADA,ADCY6,ADSS2,ALDOA,HPRT1,NME1,NME2,DIP2A,PPCS	9/194
3_Summary	KEGG Pathway	hsa00520	Amino sugar and nucleotide sugar metabolism	-15.1227	-11.4731	2821,4351,5236,5238,5373,5973,7360,29925,29926,51005,51167,55276,132789,140838,159,1728,2729,2937,3145,4830,4831,51727,79717,93100,226,231,7167,7277,9871,10382,10652,26286	GPI,MPI,PGM1,PGM3,PMM2,RENBP,UGP2,GMPPB,GMPPA,AMDHD2,CYB5R4,PGM2,GNPDA2,NANP,ADSS2,NQO1,GCLC,GSS,HMBS,NME1,NME2,CMPK1,PPCS,NAPRT,ALDOA,AKR1B1,TPI1,TUBA4A,SEC24D,TUBB4A,YKT6,ARFGAP3	32/-
3_Member	KEGG Pathway	hsa00520	Amino sugar and nucleotide sugar metabolism	-15.1227	-11.4731	2821,4351,5236,5238,5373,5973,7360,29925,29926,51005,51167,55276,132789,140838	GPI,MPI,PGM1,PGM3,PMM2,RENBP,UGP2,GMPPB,GMPPA,AMDHD2,CYB5R4,PGM2,GNPDA2,NANP	14/49
3_Member	KEGG Pathway	hsa01250	Biosynthesis of nucleotide sugars	-10.6939	-7.62414	2821,4351,5236,5238,5373,7360,29925,29926,55276,140838	GPI,MPI,PGM1,PGM3,PMM2,UGP2,GMPPB,GMPPA,PGM2,NANP	10/37
3_Member	KEGG Pathway	hsa01240	Biosynthesis of cofactors	-9.03122	-6.09764	159,1728,2729,2937,3145,4351,4830,4831,5373,7360,29925,29926,51727,79717,93100	ADSS2,NQO1,GCLC,GSS,HMBS,MPI,NME1,NME2,PMM2,UGP2,GMPPB,GMPPA,CMPK1,PPCS,NAPRT	15/153
3_Member	GO Biological Processes	GO:0009226	nucleotide-sugar biosynthetic process	-7.07588	-4.57242	4351,5238,5373,29925,51005,132789	MPI,PGM3,PMM2,GMPPB,AMDHD2,GNPDA2	6/19
3_Member	Reactome Gene Sets	R-HSA-446205	Synthesis of GDP-mannose	-6.934	-4.45467	4351,5373,29925,29926	MPI,PMM2,GMPPB,GMPPA	4/5
3_Member	KEGG Pathway	hsa00051	Fructose and mannose metabolism	-6.85262	-4.38865	226,231,4351,5373,7167,29925,29926	ALDOA,AKR1B1,MPI,PMM2,TPI1,GMPPB,GMPPA	7/33
3_Member	GO Biological Processes	GO:0009225	nucleotide-sugar metabolic process	-6.57562	-4.18611	4351,5238,5373,7360,29925,51005,132789	MPI,PGM3,PMM2,UGP2,GMPPB,AMDHD2,GNPDA2	7/36
3_Member	Reactome Gene Sets	R-HSA-446219	Synthesis of substrates in N-glycan biosythesis	-5.94677	-3.68099	4351,5238,5373,5973,29925,29926,51005,140838	MPI,PGM3,PMM2,RENBP,GMPPB,GMPPA,AMDHD2,NANP	8/63
3_Member	Reactome Gene Sets	R-HSA-446193	Biosynthesis of the N-glycan precursor (dolichol lipid-linked oligosaccharide, LLO) and transfer to a nascent protein	-5.23507	-3.05383	4351,5238,5373,5973,29925,29926,51005,140838	MPI,PGM3,PMM2,RENBP,GMPPB,GMPPA,AMDHD2,NANP	8/78
3_Member	GO Biological Processes	GO:0009298	GDP-mannose biosynthetic process	-5.12176	-2.97186	4351,5373,29925	MPI,PMM2,GMPPB	3/4
3_Member	GO Biological Processes	GO:0019673	GDP-mannose metabolic process	-4.19185	-2.23245	4351,5373,29925	MPI,PMM2,GMPPB	3/7
3_Member	Reactome Gene Sets	R-HSA-446203	Asparagine N-linked glycosylation	-3.90033	-1.99737	4351,5238,5373,5973,7277,9871,10382,10652,26286,29925,29926,51005,140838	MPI,PGM3,PMM2,RENBP,TUBA4A,SEC24D,TUBB4A,YKT6,ARFGAP3,GMPPB,GMPPA,AMDHD2,NANP	13/304
3_Member	Reactome Gene Sets	R-HSA-5609975	Diseases associated with glycosylation precursor biosynthesis	-3.11005	-1.37215	4351,5236,5373	MPI,PGM1,PMM2	3/15
3_Member	WikiPathways	WP4521	Glycosylation and related congenital defects	-2.44629	-0.866366	4351,5373,29925	MPI,PMM2,GMPPB	3/25
4_Summary	GO Biological Processes	GO:0005975	carbohydrate metabolic process	-14.8361	-11.2657	226,231,2027,2171,2729,2739,2805,2821,3417,3939,4190,4199,4351,5226,5230,5236,5238,5315,5373,5973,6515,6888,7167,7360,9446,22934,51005,55276,132789,140838,283209,283871,95,440,1491,5723,7428,131,218,216,1382,1622,2946,3029,4282,6622,11315,145482,10397,51564	ALDOA,AKR1B1,ENO3,FABP5,GCLC,GLO1,GOT1,GPI,IDH1,LDHA,MDH1,ME1,MPI,PGD,PGK1,PGM1,PGM3,PKM,PMM2,RENBP,SLC2A3,TALDO1,TPI1,UGP2,GSTO1,RPIA,AMDHD2,PGM2,GNPDA2,NANP,PGM2L1,PGP,ACY1,ASNS,CTH,PSPH,VHL,ADH7,ALDH3A1,ALDH1A1,CRABP2,DBI,GSTM2,HAGH,MIF,SNCA,PARK7,PTGR2,NDRG1,HDAC7	50/-
4_Member	GO Biological Processes	GO:0005975	carbohydrate metabolic process	-14.8361	-11.2657	226,231,2027,2171,2729,2739,2805,2821,3417,3939,4190,4199,4351,5226,5230,5236,5238,5315,5373,5973,6515,6888,7167,7360,9446,22934,51005,55276,132789,140838,283209,283871	ALDOA,AKR1B1,ENO3,FABP5,GCLC,GLO1,GOT1,GPI,IDH1,LDHA,MDH1,ME1,MPI,PGD,PGK1,PGM1,PGM3,PKM,PMM2,RENBP,SLC2A3,TALDO1,TPI1,UGP2,GSTO1,RPIA,AMDHD2,PGM2,GNPDA2,NANP,PGM2L1,PGP	32/441
4_Member	GO Biological Processes	GO:0005996	monosaccharide metabolic process	-12.5109	-9.00747	226,231,2027,2171,2729,2805,2821,4190,4351,5226,5230,5236,5315,5373,6515,7167,9446,22934,55276,283209	ALDOA,AKR1B1,ENO3,FABP5,GCLC,GOT1,GPI,MDH1,MPI,PGD,PGK1,PGM1,PKM,PMM2,SLC2A3,TPI1,GSTO1,RPIA,PGM2,PGM2L1	20/188
4_Member	KEGG Pathway	hsa01230	Biosynthesis of amino acids	-11.0601	-7.91563	95,226,440,1491,2027,2805,3417,5230,5315,5723,6888,7167,22934	ACY1,ALDOA,ASNS,CTH,ENO3,GOT1,IDH1,PGK1,PKM,PSPH,TALDO1,TPI1,RPIA	13/75
4_Member	KEGG Pathway	hsa01200	Carbon metabolism	-10.8121	-7.71881	226,2027,2805,2821,3417,4190,4199,5226,5230,5315,5723,6888,7167,22934,283871	ALDOA,ENO3,GOT1,GPI,IDH1,MDH1,ME1,PGD,PGK1,PKM,PSPH,TALDO1,TPI1,RPIA,PGP	15/115
4_Member	WikiPathways	WP4018	Clear cell renal cell carcinoma pathways	-10.2763	-7.27012	226,2027,2821,3939,4190,4199,5230,5236,5315,5723,7167,7428,55276	ALDOA,ENO3,GPI,LDHA,MDH1,ME1,PGK1,PGM1,PKM,PSPH,TPI1,VHL,PGM2	13/86
4_Member	WikiPathways	WP534	Glycolysis and gluconeogenesis	-9.77049	-6.78366	226,2027,2805,2821,3939,4190,5230,5315,6515,7167	ALDOA,ENO3,GOT1,GPI,LDHA,MDH1,PGK1,PKM,SLC2A3,TPI1	10/45
4_Member	KEGG Pathway	hsa00010	Glycolysis / Gluconeogenesis	-9.18465	-6.22993	131,218,226,2027,2821,3939,5230,5236,5315,7167,55276	ADH7,ALDH3A1,ALDOA,ENO3,GPI,LDHA,PGK1,PGM1,PKM,TPI1,PGM2	11/67
4_Member	GO Biological Processes	GO:0019318	hexose metabolic process	-8.79791	-5.88071	226,231,2027,2171,2805,2821,4190,4351,5230,5236,5315,5373,7167,55276,283209	ALDOA,AKR1B1,ENO3,FABP5,GOT1,GPI,MDH1,MPI,PGK1,PGM1,PKM,PMM2,TPI1,PGM2,PGM2L1	15/159
4_Member	WikiPathways	WP4629	Aerobic glycolysis	-8.51169	-5.68165	226,2821,3939,5230,5315,7167	ALDOA,GPI,LDHA,PGK1,PKM,TPI1	6/12
4_Member	Reactome Gene Sets	R-HSA-71387	Metabolism of carbohydrates	-8.12245	-5.37596	216,226,231,2027,2805,2821,4190,5226,5230,5236,5315,6888,7167,7360,22934,55276,132789,283209,283871	ALDH1A1,ALDOA,AKR1B1,ENO3,GOT1,GPI,MDH1,PGD,PGK1,PGM1,PKM,TALDO1,TPI1,UGP2,RPIA,PGM2,GNPDA2,PGM2L1,PGP	19/297
4_Member	Reactome Gene Sets	R-HSA-70326	Glucose metabolism	-7.63372	-4.97536	226,2027,2805,2821,4190,5230,5315,7167,132789,283209,283871	ALDOA,ENO3,GOT1,GPI,MDH1,PGK1,PKM,TPI1,GNPDA2,PGM2L1,PGP	11/93
4_Member	WikiPathways	WP1946	Cori cycle	-7.40764	-4.78336	226,2821,3939,5230,6888,7167	ALDOA,GPI,LDHA,PGK1,TALDO1,TPI1	6/17
4_Member	GO Biological Processes	GO:0046364	monosaccharide biosynthetic process	-7.26345	-4.72108	231,2027,2805,2821,4190,5226,5230,5236,7167	AKR1B1,ENO3,GOT1,GPI,MDH1,PGD,PGK1,PGM1,TPI1	9/60
4_Member	GO Biological Processes	GO:0006096	glycolytic process	-7.19696	-4.66795	226,2027,2821,3939,5230,5236,5315,7167	ALDOA,ENO3,GPI,LDHA,PGK1,PGM1,PKM,TPI1	8/44
4_Member	GO Biological Processes	GO:0006090	pyruvate metabolic process	-6.72258	-4.28447	226,2027,2821,3939,4199,5230,5236,5315,7167	ALDOA,ENO3,GPI,LDHA,ME1,PGK1,PGM1,PKM,TPI1	9/69
4_Member	GO Biological Processes	GO:0019319	hexose biosynthetic process	-6.67445	-4.25531	231,2027,2805,2821,4190,5230,5236,7167	AKR1B1,ENO3,GOT1,GPI,MDH1,PGK1,PGM1,TPI1	8/51
4_Member	Reactome Gene Sets	R-HSA-70263	Gluconeogenesis	-6.66488	-4.25363	226,2027,2805,2821,4190,5230,7167	ALDOA,ENO3,GOT1,GPI,MDH1,PGK1,TPI1	7/35
4_Member	GO Biological Processes	GO:0006006	glucose metabolic process	-6.55816	-4.17339	2027,2171,2805,2821,4190,5230,5236,5315,7167,55276,283209	ENO3,FABP5,GOT1,GPI,MDH1,PGK1,PGM1,PKM,TPI1,PGM2,PGM2L1	11/118
4_Member	Reactome Gene Sets	R-HSA-70171	Glycolysis	-6.50779	-4.12771	226,2027,2821,5230,5315,7167,132789,283209,283871	ALDOA,ENO3,GPI,PGK1,PKM,TPI1,GNPDA2,PGM2L1,PGP	9/73
4_Member	GO Biological Processes	GO:0032787	monocarboxylic acid metabolic process	-6.23563	-3.91646	131,216,226,231,1382,1622,2027,2821,2946,3029,3417,3939,4199,4282,5226,5230,5236,5315,6622,7167,11315,145482	ADH7,ALDH1A1,ALDOA,AKR1B1,CRABP2,DBI,ENO3,GPI,GSTM2,HAGH,IDH1,LDHA,ME1,MIF,PGD,PGK1,PGM1,PKM,SNCA,TPI1,PARK7,PTGR2	22/512
4_Member	GO Biological Processes	GO:0016051	carbohydrate biosynthetic process	-6.1669	-3.86756	231,2027,2805,2821,4190,5226,5230,5236,7167,7360,283871	AKR1B1,ENO3,GOT1,GPI,MDH1,PGD,PGK1,PGM1,TPI1,UGP2,PGP	11/129
4_Member	GO Biological Processes	GO:0016052	carbohydrate catabolic process	-5.91411	-3.65546	226,2027,2821,3939,5226,5230,5236,5315,7167,55276	ALDOA,ENO3,GPI,LDHA,PGD,PGK1,PGM1,PKM,TPI1,PGM2	10/110
4_Member	GO Biological Processes	GO:0006094	gluconeogenesis	-5.6858	-3.46255	2027,2805,2821,4190,5230,5236,7167	ENO3,GOT1,GPI,MDH1,PGK1,PGM1,TPI1	7/48
4_Member	Canonical Pathways	M255	PID HIF1 TFPATHWAY	-4.74472	-2.67032	226,3939,5230,5236,5315,10397,51564	ALDOA,LDHA,PGK1,PGM1,PKM,NDRG1,HDAC7	7/66
4_Member	GO Biological Processes	GO:0006735	NADH regeneration	-4.20293	-2.23458	2027,5230,5315,7167	ENO3,PGK1,PKM,TPI1	4/18
4_Member	GO Biological Processes	GO:0061621	canonical glycolysis	-4.20293	-2.23458	2027,5230,5315,7167	ENO3,PGK1,PKM,TPI1	4/18
4_Member	GO Biological Processes	GO:0061718	glucose catabolic process to pyruvate	-4.20293	-2.23458	2027,5230,5315,7167	ENO3,PGK1,PKM,TPI1	4/18
4_Member	GO Biological Processes	GO:0061615	glycolytic process through fructose-6-phosphate	-4.0119	-2.08494	2027,5230,5315,7167	ENO3,PGK1,PKM,TPI1	4/20
4_Member	GO Biological Processes	GO:0061620	glycolytic process through glucose-6-phosphate	-4.0119	-2.08494	2027,5230,5315,7167	ENO3,PGK1,PKM,TPI1	4/20
4_Member	GO Biological Processes	GO:0006007	glucose catabolic process	-3.68788	-1.82788	2027,5230,5315,7167	ENO3,PGK1,PKM,TPI1	4/24
4_Member	WikiPathways	WP5049	Glycolysis in senescence	-3.53452	-1.71872	3939,5230,5315	LDHA,PGK1,PKM	3/11
4_Member	WikiPathways	WP3614	Photodynamic therapy-induced HIF-1 survival signaling	-2.9056	-1.21886	3939,5230,5315,6515	LDHA,PGK1,PKM,SLC2A3	4/38
4_Member	GO Biological Processes	GO:0019320	hexose catabolic process	-2.78097	-1.12261	2027,5230,5315,7167	ENO3,PGK1,PKM,TPI1	4/41
4_Member	GO Biological Processes	GO:0046365	monosaccharide catabolic process	-2.49416	-0.904516	2027,5230,5315,7167	ENO3,PGK1,PKM,TPI1	4/49
5_Summary	GO Biological Processes	GO:0031344	regulation of cell projection organization	-12.0992	-8.65375	27,112,999,1072,1382,1398,1540,1857,2664,2665,2670,4134,4135,4898,5058,5063,5217,5357,5396,7074,9693,10013,10152,10677,11075,11344,23242,25793,26499,54874,56896,57609,57698,64787,348110,6692,58497,1410,2810,3872,4502,6195,6647,9043,9564,23411,79068,83481,100,4860	ABL2,ADCY6,CDH1,CFL1,CRABP2,CRK,CYLD,DVL3,GDI1,GDI2,GFAP,MAP4,MAP6,NRDC,PAK1,PAK3,PFN2,PLS1,PRRX1,TIAM1,RAPGEF2,HDAC6,ABI2,AVIL,STMN2,TWF2,COBL,FBXO7,PLEK2,FNBP1L,DPYSL5,DIP2B,SHTN1,EPS8L2,ARPIN,SPINT1,PRUNE1,CRYAB,SFN,KRT17,MT2A,RPS6KA1,SOD1,SPAG9,BCAR1,SIRT1,FTO,EPPK1,ADA,PNP	50/-
5_Member	GO Biological Processes	GO:0031344	regulation of cell projection organization	-12.0992	-8.65375	27,112,999,1072,1382,1398,1540,1857,2664,2665,2670,4134,4135,4898,5058,5063,5217,5357,5396,7074,9693,10013,10152,10677,11075,11344,23242,25793,26499,54874,56896,57609,57698,64787,348110	ABL2,ADCY6,CDH1,CFL1,CRABP2,CRK,CYLD,DVL3,GDI1,GDI2,GFAP,MAP4,MAP6,NRDC,PAK1,PAK3,PFN2,PLS1,PRRX1,TIAM1,RAPGEF2,HDAC6,ABI2,AVIL,STMN2,TWF2,COBL,FBXO7,PLEK2,FNBP1L,DPYSL5,DIP2B,SHTN1,EPS8L2,ARPIN	35/662
5_Member	GO Biological Processes	GO:0120035	regulation of plasma membrane bounded cell projection organization	-11.6918	-8.34325	27,112,999,1072,1382,1398,1540,2664,2665,2670,4134,4135,4898,5058,5063,5217,5357,5396,7074,9693,10013,10152,10677,11075,11344,23242,25793,26499,54874,56896,57609,57698,64787,348110	ABL2,ADCY6,CDH1,CFL1,CRABP2,CRK,CYLD,GDI1,GDI2,GFAP,MAP4,MAP6,NRDC,PAK1,PAK3,PFN2,PLS1,PRRX1,TIAM1,RAPGEF2,HDAC6,ABI2,AVIL,STMN2,TWF2,COBL,FBXO7,PLEK2,FNBP1L,DPYSL5,DIP2B,SHTN1,EPS8L2,ARPIN	34/647
5_Member	GO Biological Processes	GO:0010975	regulation of neuron projection development	-9.18055	-6.22993	27,112,999,1072,1382,1398,2664,2670,4135,4898,5058,5063,5396,7074,9693,10013,10152,10677,11075,11344,23242,25793,56896,57609,57698	ABL2,ADCY6,CDH1,CFL1,CRABP2,CRK,GDI1,GFAP,MAP6,NRDC,PAK1,PAK3,PRRX1,TIAM1,RAPGEF2,HDAC6,ABI2,AVIL,STMN2,TWF2,COBL,FBXO7,DPYSL5,DIP2B,SHTN1	25/452
5_Member	GO Biological Processes	GO:0031346	positive regulation of cell projection organization	-6.89202	-4.41853	27,1382,1857,2664,4135,4898,5063,7074,9693,10013,10152,10677,11075,11344,23242,26499,54874,57698,64787	ABL2,CRABP2,DVL3,GDI1,MAP6,NRDC,PAK3,TIAM1,RAPGEF2,HDAC6,ABI2,AVIL,STMN2,TWF2,COBL,PLEK2,FNBP1L,SHTN1,EPS8L2	19/355
5_Member	GO Biological Processes	GO:0050770	regulation of axonogenesis	-6.21957	-3.90844	999,1382,2664,4135,4898,5058,5063,7074,10013,11344,57609,57698	CDH1,CRABP2,GDI1,MAP6,NRDC,PAK1,PAK3,TIAM1,HDAC6,TWF2,DIP2B,SHTN1	12/155
[truncated: 273 more rows]

## Sheet: D0 total
GroupID	Category	Term	Description	LogP	Log(q-value)	Genes	Symbols	InTerm_InList
[truncated: 349 more rows]

[truncated: 2 more sheets: Δ9 D0 UP, Δ9 D0 DOWN]
