# Supplementary material for: Inactivation of Tumor Suppressor CYLD Inhibits Fibroblast Reprogramming to Pluripotency
Source: Cancers (Basel). 2023 Oct 15;15(20):4997. doi: 10.3390/cancers15204997 (PMC10605754; doi:10.3390/cancers15204997)
Supplement: Supplementary file 1 [file cancers-15-04997-s001.zip › supp_table S4.xlsx]

## Sheet: WT_D3_D0_total
GroupID	Category	Term	Description	LogP	Log(q-value)	Genes	Symbols	InTerm_InList
1_Summary	Reactome Gene Sets	R-HSA-1474244	Extracellular matrix organization	-30.5852	-26.2366	2,634,649,960,999,1277,1278,1280,1282,1287,1289,1290,1295,1301,1302,1303,1307,1634,2199,2202,2335,3371,3678,3688,3691,3694,3913,4015,4017,4053,4323,4684,5045,5054,5118,5340,5654,6383,6678,6696,7043,7057,7077,7092,7412,11117,22801,23473,30008,50848,84034,84171,84695,283208,1464,5328,7052,7058,93185,857,858,1490,2068,2670,3491,4629,7982,10211,10609,10653,23768,26585,57326,64856,83716,1435,3667,4240…	A2M,CEACAM1,BMP1,CD44,CDH1,COL1A1,COL1A2,COL2A1,COL4A1,COL4A5,COL5A1,COL5A2,COL8A1,COL11A1,COL11A2,COL12A1,COL16A1,DCN,FBLN2,EFEMP1,FN1,TNC,ITGA5,ITGB1,ITGB4,ITGB6,LAMB2,LOX,LOXL2,LTBP2,MMP14,NCAM1,FURIN,SERPINE1,PCOLCE,PLG,HTRA1,SDC2,SPARC,SPP1,TGFB3,THBS1,TIMP2,TLL1,VCAM1,EMILIN1,ITGA11,CAPN7,EFEMP2,F11R,EMILIN2,LOXL4,LOXL3,P4HA3,CSPG4,PLAU,TGM2,THBS2,IGSF8,CAV1,CAV2,CCN2,ERCC2,GFAP,CCN1,MYH11,…	116/-
1_Member	Reactome Gene Sets	R-HSA-1474244	Extracellular matrix organization	-30.5852	-26.2366	2,634,649,960,999,1277,1278,1280,1282,1287,1289,1290,1295,1301,1302,1303,1307,1634,2199,2202,2335,3371,3678,3688,3691,3694,3913,4015,4017,4053,4323,4684,5045,5054,5118,5340,5654,6383,6678,6696,7043,7057,7077,7092,7412,11117,22801,23473,30008,50848,84034,84171,84695,283208	A2M,CEACAM1,BMP1,CD44,CDH1,COL1A1,COL1A2,COL2A1,COL4A1,COL4A5,COL5A1,COL5A2,COL8A1,COL11A1,COL11A2,COL12A1,COL16A1,DCN,FBLN2,EFEMP1,FN1,TNC,ITGA5,ITGB1,ITGB4,ITGB6,LAMB2,LOX,LOXL2,LTBP2,MMP14,NCAM1,FURIN,SERPINE1,PCOLCE,PLG,HTRA1,SDC2,SPARC,SPP1,TGFB3,THBS1,TIMP2,TLL1,VCAM1,EMILIN1,ITGA11,CAPN7,EFEMP2,F11R,EMILIN2,LOXL4,LOXL3,P4HA3	54/300
1_Member	Canonical Pathways	M18	PID INTEGRIN1 PATHWAY	-20.3214	-16.5888	1277,1278,1280,1282,1287,1289,1290,1301,1302,1464,2335,3371,3678,3688,3913,5328,6696,7052,7057,7058,7412,22801,93185	COL1A1,COL1A2,COL2A1,COL4A1,COL4A5,COL5A1,COL5A2,COL11A1,COL11A2,CSPG4,FN1,TNC,ITGA5,ITGB1,LAMB2,PLAU,SPP1,TGM2,THBS1,THBS2,VCAM1,ITGA11,IGSF8	23/66
1_Member	GO Biological Processes	GO:0030198	extracellular matrix organization	-20.2994	-16.5888	649,857,858,1277,1278,1280,1282,1287,1289,1290,1295,1301,1302,1303,1307,1490,2068,2670,3491,3688,3913,4015,4017,4323,4629,5045,5340,7092,7982,10211,10609,10653,11117,23768,26585,30008,57326,64856,83716,84171,84695	BMP1,CAV1,CAV2,COL1A1,COL1A2,COL2A1,COL4A1,COL4A5,COL5A1,COL5A2,COL8A1,COL11A1,COL11A2,COL12A1,COL16A1,CCN2,ERCC2,GFAP,CCN1,ITGB1,LAMB2,LOX,LOXL2,MMP14,MYH11,FURIN,PLG,TLL1,ST7,FLOT1,P3H4,SPINT2,EMILIN1,FLRT2,GREM1,EFEMP2,PBXIP1,VWA1,CRISPLD2,LOXL4,LOXL3	41/272
1_Member	GO Biological Processes	GO:0043062	extracellular structure organization	-20.2384	-16.5888	649,857,858,1277,1278,1280,1282,1287,1289,1290,1295,1301,1302,1303,1307,1490,2068,2670,3491,3688,3913,4015,4017,4323,4629,5045,5340,7092,7982,10211,10609,10653,11117,23768,26585,30008,57326,64856,83716,84171,84695	BMP1,CAV1,CAV2,COL1A1,COL1A2,COL2A1,COL4A1,COL4A5,COL5A1,COL5A2,COL8A1,COL11A1,COL11A2,COL12A1,COL16A1,CCN2,ERCC2,GFAP,CCN1,ITGB1,LAMB2,LOX,LOXL2,MMP14,MYH11,FURIN,PLG,TLL1,ST7,FLOT1,P3H4,SPINT2,EMILIN1,FLRT2,GREM1,EFEMP2,PBXIP1,VWA1,CRISPLD2,LOXL4,LOXL3	41/273
1_Member	GO Biological Processes	GO:0045229	external encapsulating structure organization	-20.1173	-16.5469	649,857,858,1277,1278,1280,1282,1287,1289,1290,1295,1301,1302,1303,1307,1490,2068,2670,3491,3688,3913,4015,4017,4323,4629,5045,5340,7092,7982,10211,10609,10653,11117,23768,26585,30008,57326,64856,83716,84171,84695	BMP1,CAV1,CAV2,COL1A1,COL1A2,COL2A1,COL4A1,COL4A5,COL5A1,COL5A2,COL8A1,COL11A1,COL11A2,COL12A1,COL16A1,CCN2,ERCC2,GFAP,CCN1,ITGB1,LAMB2,LOX,LOXL2,MMP14,MYH11,FURIN,PLG,TLL1,ST7,FLOT1,P3H4,SPINT2,EMILIN1,FLRT2,GREM1,EFEMP2,PBXIP1,VWA1,CRISPLD2,LOXL4,LOXL3	41/275
1_Member	Reactome Gene Sets	R-HSA-2022090	Assembly of collagen fibrils and other multimeric structures	-15.8449	-12.4963	649,1277,1278,1280,1282,1287,1289,1290,1295,1301,1302,1303,3691,4015,4017,5118,7092,84171,84695	BMP1,COL1A1,COL1A2,COL2A1,COL4A1,COL4A5,COL5A1,COL5A2,COL8A1,COL11A1,COL11A2,COL12A1,ITGB4,LOX,LOXL2,PCOLCE,TLL1,LOXL4,LOXL3	19/61
1_Member	Reactome Gene Sets	R-HSA-1474228	Degradation of the extracellular matrix	-15.3459	-12.1112	2,649,960,999,1277,1278,1280,1282,1287,1289,1290,1295,1301,1302,1303,1307,1634,2335,4323,5045,5340,5654,6696,7077,7092,23473	A2M,BMP1,CD44,CDH1,COL1A1,COL1A2,COL2A1,COL4A1,COL4A5,COL5A1,COL5A2,COL8A1,COL11A1,COL11A2,COL12A1,COL16A1,DCN,FN1,MMP14,FURIN,PLG,HTRA1,SPP1,TIMP2,TLL1,CAPN7	26/140
1_Member	Reactome Gene Sets	R-HSA-216083	Integrin cell surface interactions	-15.1607	-11.9582	960,999,1277,1278,1280,1282,1287,1289,1290,1295,1307,2335,3371,3678,3688,3694,6696,7057,7412,22801,50848	CD44,CDH1,COL1A1,COL1A2,COL2A1,COL4A1,COL4A5,COL5A1,COL5A2,COL8A1,COL16A1,FN1,TNC,ITGA5,ITGB1,ITGB6,SPP1,THBS1,VCAM1,ITGA11,F11R	21/85
1_Member	Reactome Gene Sets	R-HSA-1474290	Collagen formation	-14.617	-11.4726	649,1277,1278,1280,1282,1287,1289,1290,1295,1301,1302,1303,1307,3691,4015,4017,5118,7092,84171,84695,283208	BMP1,COL1A1,COL1A2,COL2A1,COL4A1,COL4A5,COL5A1,COL5A2,COL8A1,COL11A1,COL11A2,COL12A1,COL16A1,ITGB4,LOX,LOXL2,PCOLCE,TLL1,LOXL4,LOXL3,P4HA3	21/90
1_Member	Canonical Pathways	M160	PID AVB3 INTEGRIN PATHWAY	-12.959	-9.86576	1277,1278,1280,1282,1287,1289,1290,1295,1301,1302,1303,1307,1435,2335,3667,4240,6696,50848	COL1A1,COL1A2,COL2A1,COL4A1,COL4A5,COL5A1,COL5A2,COL8A1,COL11A1,COL11A2,COL12A1,COL16A1,CSF1,FN1,IRS1,MFGE8,SPP1,F11R	18/74
1_Member	GO Biological Processes	GO:0030199	collagen fibril organization	-12.5176	-9.53079	649,1277,1278,1280,1289,1290,1301,1302,1303,4015,4017,7092,10609,26585,84171,84695	BMP1,COL1A1,COL1A2,COL2A1,COL5A1,COL5A2,COL11A1,COL11A2,COL12A1,LOX,LOXL2,TLL1,P3H4,GREM1,LOXL4,LOXL3	16/58
1_Member	Reactome Gene Sets	R-HSA-3000171	Non-integrin membrane-ECM interactions	-12.3899	-9.43926	1277,1278,1280,1282,1287,1289,1290,1301,1302,2335,3371,3688,3691,3913,6383,7057	COL1A1,COL1A2,COL2A1,COL4A1,COL4A5,COL5A1,COL5A2,COL11A1,COL11A2,FN1,TNC,ITGB1,ITGB4,LAMB2,SDC2,THBS1	16/59
1_Member	Reactome Gene Sets	R-HSA-3000178	ECM proteoglycans	-11.6344	-8.74825	1277,1278,1280,1282,1287,1289,1290,1634,2335,3371,3688,3694,3913,4684,5054,6678,7043	COL1A1,COL1A2,COL2A1,COL4A1,COL4A5,COL5A1,COL5A2,DCN,FN1,TNC,ITGB1,ITGB6,LAMB2,NCAM1,SERPINE1,SPARC,TGFB3	17/76
1_Member	Reactome Gene Sets	R-HSA-1650814	Collagen biosynthesis and modifying enzymes	-11.4566	-8.5994	649,1277,1278,1280,1282,1287,1289,1290,1295,1301,1302,1303,1307,5118,7092,283208	BMP1,COL1A1,COL1A2,COL2A1,COL4A1,COL4A5,COL5A1,COL5A2,COL8A1,COL11A1,COL11A2,COL12A1,COL16A1,PCOLCE,TLL1,P4HA3	16/67
1_Member	KEGG Pathway	hsa04512	ECM-receptor interaction	-10.5451	-7.77631	960,1277,1278,1280,1282,1287,2335,3371,3678,3688,3691,3694,3913,6696,7057,7058,22801	CD44,COL1A1,COL1A2,COL2A1,COL4A1,COL4A5,FN1,TNC,ITGA5,ITGB1,ITGB4,ITGB6,LAMB2,SPP1,THBS1,THBS2,ITGA11	17/88
1_Member	Reactome Gene Sets	R-HSA-9006934	Signaling by Receptor Tyrosine Kinases	-10.3962	-7.66047	558,857,1277,1278,1280,1282,1287,1289,1290,1301,1302,2152,2260,2335,2670,3667,3688,3913,4067,4609,4665,5045,5046,5340,5519,5764,5795,6678,6696,6776,7057,7058,8829,10253,10458,10653,10818,11033,23768,30011,57498	AXL,CAV1,COL1A1,COL1A2,COL2A1,COL4A1,COL4A5,COL5A1,COL5A2,COL11A1,COL11A2,F3,FGFR1,FN1,GFAP,IRS1,ITGB1,LAMB2,LYN,MYC,NAB2,FURIN,PCSK6,PLG,PPP2R1B,PTN,PTPRJ,SPARC,SPP1,STAT5A,THBS1,THBS2,NRP1,SPRY2,BAIAP2,SPINT2,FRS2,ADAP1,FLRT2,SH3KBP1,KIDINS220	41/524
1_Member	WikiPathways	WP306	Focal adhesion	-10.0789	-7.36379	857,858,1277,1278,1280,1282,1290,2335,3055,3371,3678,3688,3691,3694,3913,5501,6696,7057,7058,7791,10298,10398,22801,103910	CAV1,CAV2,COL1A1,COL1A2,COL2A1,COL4A1,COL5A2,FN1,HCK,TNC,ITGA5,ITGB1,ITGB4,ITGB6,LAMB2,PPP1CC,SPP1,THBS1,THBS2,ZYX,PAK4,MYL9,ITGA11,MYL12B	24/198
1_Member	Canonical Pathways	M53	PID INTEGRIN3 PATHWAY	-9.60615	-6.91081	1277,1278,1282,1287,2335,3371,3491,5328,6696,7057,7070,50848	COL1A1,COL1A2,COL4A1,COL4A5,FN1,TNC,CCN1,PLAU,SPP1,THBS1,THY1,F11R	12/43
1_Member	Reactome Gene Sets	R-HSA-1442490	Collagen degradation	-9.55452	-6.87806	1277,1278,1280,1282,1287,1289,1290,1295,1301,1302,1303,1307,4323,5045	COL1A1,COL1A2,COL2A1,COL4A1,COL4A5,COL5A1,COL5A2,COL8A1,COL11A1,COL11A2,COL12A1,COL16A1,MMP14,FURIN	14/64
1_Member	Canonical Pathways	M3005	NABA COLLAGENS	-9.47735	-6.83418	1277,1278,1280,1282,1287,1289,1290,1295,1301,1302,1303,1307	COL1A1,COL1A2,COL2A1,COL4A1,COL4A5,COL5A1,COL5A2,COL8A1,COL11A1,COL11A2,COL12A1,COL16A1	12/44
1_Member	Reactome Gene Sets	R-HSA-8948216	Collagen chain trimerization	-9.47735	-6.83418	1277,1278,1280,1282,1287,1289,1290,1295,1301,1302,1303,1307	COL1A1,COL1A2,COL2A1,COL4A1,COL4A5,COL5A1,COL5A2,COL8A1,COL11A1,COL11A2,COL12A1,COL16A1	12/44
1_Member	Reactome Gene Sets	R-HSA-3000170	Syndecan interactions	-9.47517	-6.83418	1277,1278,1289,1290,2335,3371,3688,3691,6383,7057	COL1A1,COL1A2,COL5A1,COL5A2,FN1,TNC,ITGB1,ITGB4,SDC2,THBS1	10/27
1_Member	Canonical Pathways	M198	PID SYNDECAN 1 PATHWAY	-9.23037	-6.62217	1277,1278,1280,1282,1287,1289,1290,1295,1301,1302,1303,1307	COL1A1,COL1A2,COL2A1,COL4A1,COL4A5,COL5A1,COL5A2,COL8A1,COL11A1,COL11A2,COL12A1,COL16A1	12/46
1_Member	KEGG Pathway	hsa04510	Focal adhesion	-9.09981	-6.49944	857,858,1277,1278,1280,1282,1287,2335,3371,3678,3688,3691,3694,3913,5501,6696,7057,7058,7791,10298,10398,22801,103910	CAV1,CAV2,COL1A1,COL1A2,COL2A1,COL4A1,COL4A5,FN1,TNC,ITGA5,ITGB1,ITGB4,ITGB6,LAMB2,PPP1CC,SPP1,THBS1,THBS2,ZYX,PAK4,MYL9,ITGA11,MYL12B	23/203
1_Member	Reactome Gene Sets	R-HSA-8874081	MET activates PTK2 signaling	-8.9517	-6.35902	1277,1278,1280,1289,1290,1301,1302,2335,3688,3913	COL1A1,COL1A2,COL2A1,COL5A1,COL5A2,COL11A1,COL11A2,FN1,ITGB1,LAMB2	10/30
1_Member	WikiPathways	WP2911	miRNA targets in ECM and membrane receptors	-8.41179	-5.88278	1278,1282,1289,1290,2335,3694,3913,6383,7057,7058,22801	COL1A2,COL4A1,COL5A1,COL5A2,FN1,ITGB6,LAMB2,SDC2,THBS1,THBS2,ITGA11	11/43
1_Member	Reactome Gene Sets	R-HSA-8875878	MET promotes cell motility	-7.48294	-5.11904	1277,1278,1280,1289,1290,1301,1302,2335,3688,3913	COL1A1,COL1A2,COL2A1,COL5A1,COL5A2,COL11A1,COL11A2,FN1,ITGB1,LAMB2	10/41
1_Member	Reactome Gene Sets	R-HSA-6806834	Signaling by MET	-7.33417	-5.0068	1277,1278,1280,1289,1290,1301,1302,2335,3688,3913,5795,10653,30011	COL1A1,COL1A2,COL2A1,COL5A1,COL5A2,COL11A1,COL11A2,FN1,ITGB1,LAMB2,PTPRJ,SPINT2,SH3KBP1	13/79
1_Member	Reactome Gene Sets	R-HSA-186797	Signaling by PDGF	-6.95569	-4.67532	1280,1282,1287,1289,1290,5045,5340,6696,6776,7057,7058	COL2A1,COL4A1,COL4A5,COL5A1,COL5A2,FURIN,PLG,SPP1,STAT5A,THBS1,THBS2	11/58
1_Member	KEGG Pathway	hsa04974	Protein digestion and absorption	-6.76961	-4.52142	481,1277,1278,1280,1282,1287,1289,1290,1295,1301,1302,1303,1307,6510	ATP1B1,COL1A1,COL1A2,COL2A1,COL4A1,COL4A5,COL5A1,COL5A2,COL8A1,COL11A1,COL11A2,COL12A1,COL16A1,SLC1A5	14/103
1_Member	WikiPathways	WP3932	Focal adhesion: PI3K-Akt-mTOR-signaling pathway	-6.46657	-4.2834	1277,1278,1280,1282,1289,1290,1301,1302,1435,2149,2260,2335,3371,3667,3678,3688,3691,3694,3913,5519,6696,7057,7058,22801	COL1A1,COL1A2,COL2A1,COL4A1,COL5A1,COL5A2,COL11A1,COL11A2,CSF1,F2R,FGFR1,FN1,TNC,IRS1,ITGA5,ITGB1,ITGB4,ITGB6,LAMB2,PPP2R1B,SPP1,THBS1,THBS2,ITGA11	24/302
1_Member	KEGG Pathway	hsa04151	PI3K-Akt signaling pathway	-5.76204	-3.68532	598,672,1277,1278,1280,1282,1287,1435,2149,2260,2335,3371,3667,3678,3688,3691,3694,3913,4609,5519,6696,7057,7058,7534,22801	BCL2L1,BRCA1,COL1A1,COL1A2,COL2A1,COL4A1,COL4A5,CSF1,F2R,FGFR1,FN1,TNC,IRS1,ITGA5,ITGB1,ITGB4,ITGB6,LAMB2,MYC,PPP2R1B,SPP1,THBS1,THBS2,YWHAZ,ITGA11	25/354
1_Member	WikiPathways	WP4172	PI3K-Akt signaling pathway	-5.5754	-3.54281	598,672,1277,1278,1280,1282,1287,1435,2149,2260,2335,3371,3667,3678,3688,3691,3694,3913,4609,5519,6696,7057,7058,22801	BCL2L1,BRCA1,COL1A1,COL1A2,COL2A1,COL4A1,COL4A5,CSF1,F2R,FGFR1,FN1,TNC,IRS1,ITGA5,ITGB1,ITGB4,ITGB6,LAMB2,MYC,PPP2R1B,SPP1,THBS1,THBS2,ITGA11	24/339
1_Member	KEGG Pathway	hsa05165	Human papillomavirus infection	-4.73511	-2.85342	1277,1278,1280,1282,1287,1741,2335,2535,3371,3678,3688,3691,3694,3913,3993,5519,5743,6696,7057,7058,22801,84552	COL1A1,COL1A2,COL2A1,COL4A1,COL4A5,DLG3,FN1,FZD2,TNC,ITGA5,ITGB1,ITGB4,ITGB6,LAMB2,LLGL2,PPP2R1B,PTGS2,SPP1,THBS1,THBS2,ITGA11,PARD6G	22/331
1_Member	Reactome Gene Sets	R-HSA-419037	NCAM1 interactions	-4.24834	-2.47497	1280,1282,1287,1289,1290,4684,5621	COL2A1,COL4A1,COL4A5,COL5A1,COL5A2,NCAM1,PRNP	7/42
1_Member	WikiPathways	WP453	Inflammatory response pathway	-4.17719	-2.41603	958,1277,1278,2335,3913,7057	CD40,COL1A1,COL1A2,FN1,LAMB2,THBS1	6/30
1_Member	Reactome Gene Sets	R-HSA-375165	NCAM signaling for neurite out-growth	-3.90433	-2.19824	1280,1282,1287,1289,1290,2260,4684,5621	COL2A1,COL4A1,COL4A5,COL5A1,COL5A2,FGFR1,NCAM1,PRNP	8/63
2_Summary	GO Biological Processes	GO:0097435	supramolecular fiber organization	-29.623	-25.5755	58,408,649,800,1264,1265,1266,1277,1278,1280,1289,1290,1301,1302,1303,1465,1674,1832,2195,2670,3688,3854,3856,3860,3861,3868,3872,3880,4015,4017,4053,4082,4542,4629,5045,5317,7018,7092,7126,7168,7169,7428,7791,9645,10398,10458,10580,10609,10677,10788,11075,11117,11344,25802,26585,27229,29904,30008,30011,51474,51673,54509,57477,57580,57698,79729,80179,84171,84695,116985,342184,1525,3993,4287,5341,…	ACTA1,ARRB1,BMP1,CALD1,CNN1,CNN2,CNN3,COL1A1,COL1A2,COL2A1,COL5A1,COL5A2,COL11A1,COL11A2,COL12A1,CSRP1,DES,DSP,FAT1,GFAP,ITGB1,KRT6B,KRT8,KRT13,KRT14,KRT16,KRT17,KRT19,LOX,LOXL2,LTBP2,MARCKS,MYO1F,MYH11,FURIN,PKP1,TF,TLL1,TNFAIP1,TPM1,TPM2,VHL,ZYX,MICAL2,MYL9,BAIAP2,SORBS1,P3H4,AVIL,IQGAP2,STMN2,EMILIN1,TWF2,LMOD1,GREM1,TUBGCP4,EEF2K,EFEMP2,SH3KBP1,LIMA1,TPPP3,RHOF,SHROOM4,PREX1,SHTN1,SH3D21,MYO1…	91/-
2_Member	GO Biological Processes	GO:0097435	supramolecular fiber organization	-29.623	-25.5755	58,408,649,800,1264,1265,1266,1277,1278,1280,1289,1290,1301,1302,1303,1465,1674,1832,2195,2670,3688,3854,3856,3860,3861,3868,3872,3880,4015,4017,4053,4082,4542,4629,5045,5317,7018,7092,7126,7168,7169,7428,7791,9645,10398,10458,10580,10609,10677,10788,11075,11117,11344,25802,26585,27229,29904,30008,30011,51474,51673,54509,57477,57580,57698,79729,80179,84171,84695,116985,342184	ACTA1,ARRB1,BMP1,CALD1,CNN1,CNN2,CNN3,COL1A1,COL1A2,COL2A1,COL5A1,COL5A2,COL11A1,COL11A2,COL12A1,CSRP1,DES,DSP,FAT1,GFAP,ITGB1,KRT6B,KRT8,KRT13,KRT14,KRT16,KRT17,KRT19,LOX,LOXL2,LTBP2,MARCKS,MYO1F,MYH11,FURIN,PKP1,TF,TLL1,TNFAIP1,TPM1,TPM2,VHL,ZYX,MICAL2,MYL9,BAIAP2,SORBS1,P3H4,AVIL,IQGAP2,STMN2,EMILIN1,TWF2,LMOD1,GREM1,TUBGCP4,EEF2K,EFEMP2,SH3KBP1,LIMA1,TPPP3,RHOF,SHROOM4,PREX1,SHTN1,SH3D21,MYO1…	71/569
2_Member	GO Biological Processes	GO:0030036	actin cytoskeleton organization	-19.646	-16.1425	58,408,800,1264,1265,1266,1465,1525,2195,3688,3856,3880,3993,4082,4287,4542,4629,5341,5592,6525,7018,7126,7168,7169,7791,9294,9645,10391,10395,10398,10458,10580,10677,10788,11344,23022,23433,25802,26499,29904,30011,30846,50848,51474,54509,54961,55561,57381,57477,57580,57698,79729,80179,85360,116985,342184	ACTA1,ARRB1,CALD1,CNN1,CNN2,CNN3,CSRP1,CXADR,FAT1,ITGB1,KRT8,KRT19,LLGL2,MARCKS,ATXN3,MYO1F,MYH11,PLEK,PRKG1,SMTN,TF,TNFAIP1,TPM1,TPM2,ZYX,S1PR2,MICAL2,CORO2B,DLC1,MYL9,BAIAP2,SORBS1,AVIL,IQGAP2,TWF2,PALLD,RHOQ,LMOD1,PLEK2,EEF2K,SH3KBP1,EHD2,F11R,LIMA1,RHOF,SSH3,CDC42BPG,RHOJ,SHROOM4,PREX1,SHTN1,SH3D21,MYO19,SYDE1,ARAP1,FMN1	56/536
2_Member	GO Biological Processes	GO:0030029	actin filament-based process	-18.8119	-15.3665	58,408,800,1264,1265,1266,1465,1525,2195,3688,3856,3880,3993,4082,4287,4542,4629,5341,5592,6444,6525,7018,7126,7168,7169,7791,9294,9645,10391,10395,10398,10458,10580,10630,10677,10788,11344,23022,23433,25802,26499,29904,30011,30846,50848,51474,54509,54961,55561,57381,57477,57580,57698,79729,80179,85360,116985,342184	ACTA1,ARRB1,CALD1,CNN1,CNN2,CNN3,CSRP1,CXADR,FAT1,ITGB1,KRT8,KRT19,LLGL2,MARCKS,ATXN3,MYO1F,MYH11,PLEK,PRKG1,SGCD,SMTN,TF,TNFAIP1,TPM1,TPM2,ZYX,S1PR2,MICAL2,CORO2B,DLC1,MYL9,BAIAP2,SORBS1,PDPN,AVIL,IQGAP2,TWF2,PALLD,RHOQ,LMOD1,PLEK2,EEF2K,SH3KBP1,EHD2,F11R,LIMA1,RHOF,SSH3,CDC42BPG,RHOJ,SHROOM4,PREX1,SHTN1,SH3D21,MYO19,SYDE1,ARAP1,FMN1	58/597
2_Member	GO Biological Processes	GO:0007015	actin filament organization	-12.5913	-9.58517	58,408,800,1264,1265,1266,2195,4082,4542,7018,7126,7168,7169,7791,9645,10458,10580,10677,10788,11344,25802,30011,51474,54509,57477,57580,57698,79729,80179,116985,342184	ACTA1,ARRB1,CALD1,CNN1,CNN2,CNN3,FAT1,MARCKS,MYO1F,TF,TNFAIP1,TPM1,TPM2,ZYX,MICAL2,BAIAP2,SORBS1,AVIL,IQGAP2,TWF2,LMOD1,SH3KBP1,LIMA1,RHOF,SHROOM4,PREX1,SHTN1,SH3D21,MYO19,ARAP1,FMN1	31/261
3_Summary	Canonical Pathways	M5884	NABA CORE MATRISOME	-17.5292	-14.1349	1277,1278,1280,1282,1287,1289,1290,1295,1301,1302,1303,1307,1490,1634,1893,2199,2202,2335,3371,3490,3491,3913,4053,4240,5118,6586,6678,6696,7057,7058,8840,9353,11117,30008,51232,64856,83716,84034,721,1435,6383,7018,11098,54587,57104,5340	COL1A1,COL1A2,COL2A1,COL4A1,COL4A5,COL5A1,COL5A2,COL8A1,COL11A1,COL11A2,COL12A1,COL16A1,CCN2,DCN,ECM1,FBLN2,EFEMP1,FN1,TNC,IGFBP7,CCN1,LAMB2,LTBP2,MFGE8,PCOLCE,SLIT3,SPARC,SPP1,THBS1,THBS2,CCN4,SLIT2,EMILIN1,EFEMP2,CRIM1,VWA1,CRISPLD2,EMILIN2,C4B,CSF1,SDC2,TF,PRSS23,MXRA8,PNPLA2,PLG	46/-
3_Member	Canonical Pathways	M5884	NABA CORE MATRISOME	-17.5292	-14.1349	1277,1278,1280,1282,1287,1289,1290,1295,1301,1302,1303,1307,1490,1634,1893,2199,2202,2335,3371,3490,3491,3913,4053,4240,5118,6586,6678,6696,7057,7058,8840,9353,11117,30008,51232,64856,83716,84034	COL1A1,COL1A2,COL2A1,COL4A1,COL4A5,COL5A1,COL5A2,COL8A1,COL11A1,COL11A2,COL12A1,COL16A1,CCN2,DCN,ECM1,FBLN2,EFEMP1,FN1,TNC,IGFBP7,CCN1,LAMB2,LTBP2,MFGE8,PCOLCE,SLIT3,SPARC,SPP1,THBS1,THBS2,CCN4,SLIT2,EMILIN1,EFEMP2,CRIM1,VWA1,CRISPLD2,EMILIN2	38/275
3_Member	Canonical Pathways	M3008	NABA ECM GLYCOPROTEINS	-10.9613	-8.169	1490,1893,2199,2202,2335,3371,3490,3491,3913,4053,4240,5118,6586,6678,6696,7057,7058,8840,9353,11117,30008,51232,64856,83716,84034	CCN2,ECM1,FBLN2,EFEMP1,FN1,TNC,IGFBP7,CCN1,LAMB2,LTBP2,MFGE8,PCOLCE,SLIT3,SPARC,SPP1,THBS1,THBS2,CCN4,SLIT2,EMILIN1,EFEMP2,CRIM1,VWA1,CRISPLD2,EMILIN2	25/196
3_Member	Reactome Gene Sets	R-HSA-8957275	Post-translational protein phosphorylation	-7.33621	-5.0068	721,1435,2335,3371,3490,3491,3913,4240,6383,6696,7018,11098,54587,57104,64856	C4B,CSF1,FN1,TNC,IGFBP7,CCN1,LAMB2,MFGE8,SDC2,SPP1,TF,PRSS23,MXRA8,PNPLA2,VWA1	15/108
3_Member	Reactome Gene Sets	R-HSA-381426	Regulation of Insulin-like Growth Factor (IGF) transport and uptake by Insulin-like Growth Factor Binding Proteins (IGFBPs)	-7.27085	-4.97151	721,1435,2335,3371,3490,3491,3913,4240,5340,6383,6696,7018,11098,54587,57104,64856	C4B,CSF1,FN1,TNC,IGFBP7,CCN1,LAMB2,MFGE8,PLG,SDC2,SPP1,TF,PRSS23,MXRA8,PNPLA2,VWA1	16/125
4_Summary	GO Biological Processes	GO:0009611	response to wounding	-15.7717	-12.4646	558,634,958,960,1265,1277,1289,1465,1490,1832,2149,2152,2335,2596,2670,3162,3371,3491,3678,3688,3691,3694,3705,3913,4015,4067,4162,4548,5328,5336,5340,5341,6647,6657,7035,7043,7056,7070,7168,8613,8829,10398,10630,57132,646960,653145,857,5054,5592,6776,7057,10391,11117,84034	AXL,CEACAM1,CD40,CD44,CNN2,COL1A1,COL5A1,CSRP1,CCN2,DSP,F2R,F3,FN1,GAP43,GFAP,HMOX1,TNC,CCN1,ITGA5,ITGB1,ITGB4,ITGB6,ITPK1,LAMB2,LOX,LYN,MCAM,MTR,PLAU,PLCG2,PLG,PLEK,SOD1,SOX2,TFPI,TGFB3,THBD,THY1,TPM1,PLPP3,NRP1,MYL9,PDPN,CHMP1B,PRSS56,ANXA8,CAV1,SERPINE1,PRKG1,STAT5A,THBS1,CORO2B,EMILIN1,EMILIN2	54/-
4_Member	GO Biological Processes	GO:0009611	response to wounding	-15.7717	-12.4646	558,634,958,960,1265,1277,1289,1465,1490,1832,2149,2152,2335,2596,2670,3162,3371,3491,3678,3688,3691,3694,3705,3913,4015,4067,4162,4548,5328,5336,5340,5341,6647,6657,7035,7043,7056,7070,7168,8613,8829,10398,10630,57132,646960,653145	AXL,CEACAM1,CD40,CD44,CNN2,COL1A1,COL5A1,CSRP1,CCN2,DSP,F2R,F3,FN1,GAP43,GFAP,HMOX1,TNC,CCN1,ITGA5,ITGB1,ITGB4,ITGB6,ITPK1,LAMB2,LOX,LYN,MCAM,MTR,PLAU,PLCG2,PLG,PLEK,SOD1,SOX2,TFPI,TGFB3,THBD,THY1,TPM1,PLPP3,NRP1,MYL9,PDPN,CHMP1B,PRSS56,ANXA8	46/452
4_Member	GO Biological Processes	GO:0042060	wound healing	-11.8071	-8.8899	558,634,958,960,1265,1277,1289,1465,1832,2149,2152,2335,3162,3491,3678,3688,3694,3705,4015,4162,5328,5336,5340,5341,7035,7043,7056,7168,8613,10398,10630,57132,646960,653145	AXL,CEACAM1,CD40,CD44,CNN2,COL1A1,COL5A1,CSRP1,DSP,F2R,F3,FN1,HMOX1,CCN1,ITGA5,ITGB1,ITGB6,ITPK1,LOX,MCAM,PLAU,PLCG2,PLG,PLEK,TFPI,TGFB3,THBD,TPM1,PLPP3,MYL9,PDPN,CHMP1B,PRSS56,ANXA8	34/334
4_Member	GO Biological Processes	GO:0050878	regulation of body fluid levels	-5.87347	-3.77288	558,634,857,958,1465,2149,2152,3705,5054,5328,5336,5340,5341,5592,6776,7035,7056,7057,10391,10398,10630,11117,84034,646960,653145	AXL,CEACAM1,CAV1,CD40,CSRP1,F2R,F3,ITPK1,SERPINE1,PLAU,PLCG2,PLG,PLEK,PRKG1,STAT5A,TFPI,THBD,THBS1,CORO2B,MYL9,PDPN,EMILIN1,EMILIN2,PRSS56,ANXA8	25/349
4_Member	GO Biological Processes	GO:0007596	blood coagulation	-5.31591	-3.32719	558,958,1465,2149,2152,3705,5328,5336,5340,5341,7035,7056,10398,10630,646960,653145	AXL,CD40,CSRP1,F2R,F3,ITPK1,PLAU,PLCG2,PLG,PLEK,TFPI,THBD,MYL9,PDPN,PRSS56,ANXA8	16/174
4_Member	GO Biological Processes	GO:0050817	coagulation	-5.25202	-3.28186	558,958,1465,2149,2152,3705,5328,5336,5340,5341,7035,7056,10398,10630,646960,653145	AXL,CD40,CSRP1,F2R,F3,ITPK1,PLAU,PLCG2,PLG,PLEK,TFPI,THBD,MYL9,PDPN,PRSS56,ANXA8	16/176
4_Member	GO Biological Processes	GO:0007599	hemostasis	-5.12713	-3.17477	558,958,1465,2149,2152,3705,5328,5336,5340,5341,7035,7056,10398,10630,646960,653145	AXL,CD40,CSRP1,F2R,F3,ITPK1,PLAU,PLCG2,PLG,PLEK,TFPI,THBD,MYL9,PDPN,PRSS56,ANXA8	16/180
4_Member	GO Biological Processes	GO:0030168	platelet activation	-2.58426	-1.18606	558,958,1465,2149,5336,5341,10398,10630	AXL,CD40,CSRP1,F2R,PLCG2,PLEK,MYL9,PDPN	8/99
5_Summary	GO Biological Processes	GO:0010810	regulation of cell-substrate adhesion	-15.3923	-12.1229	402,1277,1295,1307,1435,1601,2199,2335,3491,3678,4287,4323,5054,5328,5340,5795,6789,7057,7070,8829,10391,10395,10630,11117,26585,30008,55679,55920,57580,79834,90102,342184,857,2049,7058,10211,23768,29904	ARL2,COL1A1,COL8A1,COL16A1,CSF1,DAB2,FBLN2,FN1,CCN1,ITGA5,ATXN3,MMP14,SERPINE1,PLAU,PLG,PTPRJ,STK4,THBS1,THY1,NRP1,CORO2B,DLC1,PDPN,EMILIN1,GREM1,EFEMP2,LIMS2,RCC2,PREX1,PEAK1,PHLDB2,FMN1,CAV1,EPHB3,THBS2,FLOT1,FLRT2,EEF2K	38/-
5_Member	GO Biological Processes	GO:0010810	regulation of cell-substrate adhesion	-15.3923	-12.1229	402,1277,1295,1307,1435,1601,2199,2335,3491,3678,4287,4323,5054,5328,5340,5795,6789,7057,7070,8829,10391,10395,10630,11117,26585,30008,55679,55920,57580,79834,90102,342184	ARL2,COL1A1,COL8A1,COL16A1,CSF1,DAB2,FBLN2,FN1,CCN1,ITGA5,ATXN3,MMP14,SERPINE1,PLAU,PLG,PTPRJ,STK4,THBS1,THY1,NRP1,CORO2B,DLC1,PDPN,EMILIN1,GREM1,EFEMP2,LIMS2,RCC2,PREX1,PEAK1,PHLDB2,FMN1	32/222
5_Member	GO Biological Processes	GO:0010811	positive regulation of cell-substrate adhesion	-8.93402	-6.34889	402,1295,1307,1435,1601,2199,2335,3491,3678,5795,6789,7070,8829,11117,30008,55679,57580,342184	ARL2,COL8A1,COL16A1,CSF1,DAB2,FBLN2,FN1,CCN1,ITGA5,PTPRJ,STK4,THY1,NRP1,EMILIN1,EFEMP2,LIMS2,PREX1,FMN1	18/125
5_Member	GO Biological Processes	GO:1901890	positive regulation of cell junction assembly	-4.31934	-2.52829	857,1307,2049,5795,7058,7070,8829,10211,23768,29904,342184	CAV1,COL16A1,EPHB3,PTPRJ,THBS2,THY1,NRP1,FLOT1,FLRT2,EEF2K,FMN1	11/106
5_Member	GO Biological Processes	GO:0051894	positive regulation of focal adhesion assembly	-3.47652	-1.85712	1307,5795,7070,8829,342184	COL16A1,PTPRJ,THY1,NRP1,FMN1	5/26
5_Member	GO Biological Processes	GO:0001954	positive regulation of cell-matrix adhesion	-3.43954	-1.83449	1307,1435,5795,7070,8829,30008,342184	COL16A1,CSF1,PTPRJ,THY1,NRP1,EFEMP2,FMN1	7/56
5_Member	GO Biological Processes	GO:0150117	positive regulation of cell-substrate junction organization	-3.10721	-1.58277	1307,5795,7070,8829,342184	COL16A1,PTPRJ,THY1,NRP1,FMN1	5/31
6_Summary	Reactome Gene Sets	R-HSA-1566948	Elastic fibre formation	-14.6656	-11.4931	2199,2202,2335,3678,3688,3694,4015,4017,4053,5045,7043,11117,30008,84034,84171,84695	FBLN2,EFEMP1,FN1,ITGA5,ITGB1,ITGB6,LOX,LOXL2,LTBP2,FURIN,TGFB3,EMILIN1,EFEMP2,EMILIN2,LOXL4,LOXL3	16/-
6_Member	Reactome Gene Sets	R-HSA-1566948	Elastic fibre formation	-14.6656	-11.4931	2199,2202,2335,3678,3688,3694,4015,4017,4053,5045,7043,11117,30008,84034,84171,84695	FBLN2,EFEMP1,FN1,ITGA5,ITGB1,ITGB6,LOX,LOXL2,LTBP2,FURIN,TGFB3,EMILIN1,EFEMP2,EMILIN2,LOXL4,LOXL3	16/44
6_Member	Reactome Gene Sets	R-HSA-2129379	Molecules associated with elastic fibres	-7.95312	-5.51763	2199,2202,2335,3688,3694,4053,7043,11117,30008,84034	FBLN2,EFEMP1,FN1,ITGB1,ITGB6,LTBP2,TGFB3,EMILIN1,EFEMP2,EMILIN2	10/37
7_Summary	Reactome Gene Sets	R-HSA-2243919	Crosslinking of collagen fibrils	-13.4325	-10.3144	649,1277,1278,1282,1287,4015,4017,5118,7092,84171,84695,2152,2335,5054,5336,6776,7043,7056,7412,113026,598,1290,1307,1490,1788,3856,4067,7009,10458,27244,22801,3688,10630,3691,7534,2149,5501,5592,103910,3572,3667,7070,8829	BMP1,COL1A1,COL1A2,COL4A1,COL4A5,LOX,LOXL2,PCOLCE,TLL1,LOXL4,LOXL3,F3,FN1,SERPINE1,PLCG2,STAT5A,TGFB3,THBD,VCAM1,PLCD3,BCL2L1,COL5A2,COL16A1,CCN2,DNMT3A,KRT8,LYN,TMBIM6,BAIAP2,SESN1,ITGA11,ITGB1,PDPN,ITGB4,YWHAZ,F2R,PPP1CC,PRKG1,MYL12B,IL6ST,IRS1,THY1,NRP1	43/-
7_Member	Reactome Gene Sets	R-HSA-2243919	Crosslinking of collagen fibrils	-13.4325	-10.3144	649,1277,1278,1282,1287,4015,4017,5118,7092,84171,84695	BMP1,COL1A1,COL1A2,COL4A1,COL4A5,LOX,LOXL2,PCOLCE,TLL1,LOXL4,LOXL3	11/18
7_Member	Reactome Gene Sets	R-HSA-2214320	Anchoring fibril formation	-6.11855	-3.99788	649,1277,1278,1282,1287,7092	BMP1,COL1A1,COL1A2,COL4A1,COL4A5,TLL1	6/15
7_Member	KEGG Pathway	hsa04933	AGE-RAGE signaling pathway in diabetic complications	-6.10336	-3.98525	1277,1278,1282,1287,2152,2335,5054,5336,6776,7043,7056,7412,113026	COL1A1,COL1A2,COL4A1,COL4A5,F3,FN1,SERPINE1,PLCG2,STAT5A,TGFB3,THBD,VCAM1,PLCD3	13/100
7_Member	GO Biological Processes	GO:0001101	response to acid chemical	-4.54427	-2.70492	598,1277,1278,1282,1290,1307,1490,1788,3856,4067,7009,10458,27244	BCL2L1,COL1A1,COL1A2,COL4A1,COL5A2,COL16A1,CCN2,DNMT3A,KRT8,LYN,TMBIM6,BAIAP2,SESN1	13/138
7_Member	GO Biological Processes	GO:0043200	response to amino acid	-4.42542	-2.61845	598,1277,1278,1282,1290,1307,1490,1788,4067,7009,10458,27244	BCL2L1,COL1A1,COL1A2,COL4A1,COL5A2,COL16A1,CCN2,DNMT3A,LYN,TMBIM6,BAIAP2,SESN1	12/122
7_Member	GO Biological Processes	GO:0071230	cellular response to amino acid stimulus	-3.82367	-2.12929	598,1277,1278,1282,1290,1307,1788,10458,27244	BCL2L1,COL1A1,COL1A2,COL4A1,COL5A2,COL16A1,DNMT3A,BAIAP2,SESN1	9/82
7_Member	GO Biological Processes	GO:0071229	cellular response to acid chemical	-3.47896	-1.85712	598,1277,1278,1282,1290,1307,1788,10458,27244	BCL2L1,COL1A1,COL1A2,COL4A1,COL5A2,COL16A1,DNMT3A,BAIAP2,SESN1	9/91
7_Member	GO Biological Processes	GO:0038065	collagen-activated signaling pathway	-3.44577	-1.83679	1277,1282,1287,22801	COL1A1,COL4A1,COL4A5,ITGA11	4/15
7_Member	Reactome Gene Sets	R-HSA-75892	Platelet Adhesion to exposed collagen	-3.44577	-1.83679	1277,1278,3688,4067	COL1A1,COL1A2,ITGB1,LYN	4/15
7_Member	Reactome Gene Sets	R-HSA-114604	GPVI-mediated activation cascade	-2.86019	-1.38901	1277,1278,4067,5336,10630	COL1A1,COL1A2,LYN,PLCG2,PDPN	5/35
7_Member	GO Biological Processes	GO:0038063	collagen-activated tyrosine kinase receptor signaling pathway	-2.84166	-1.38016	1277,1282,1287	COL1A1,COL4A1,COL4A5	3/10
7_Member	GO Biological Processes	GO:0043589	skin morphogenesis	-2.59393	-1.19269	1277,1278,3691	COL1A1,COL1A2,ITGB4	3/12
7_Member	Reactome Gene Sets	R-HSA-430116	GP1b-IX-V activation signalling	-2.59393	-1.19269	1277,1278,7534	COL1A1,COL1A2,YWHAZ	3/12
7_Member	KEGG Pathway	hsa04611	Platelet activation	-2.52204	-1.13868	1277,1278,2149,3688,4067,5336,5501,5592,103910	COL1A1,COL1A2,F2R,ITGB1,LYN,PLCG2,PPP1CC,PRKG1,MYL12B	9/124
7_Member	WikiPathways	WP5036	Angiotensin II receptor type 1 pathway	-2.3766	-1.03686	1277,1278,1490,3572	COL1A1,COL1A2,CCN2,IL6ST	4/28
7_Member	Canonical Pathways	M28	PID IL4 2PATHWAY	-2.37363	-1.03686	598,1277,1278,3667,6776,7070	BCL2L1,COL1A1,COL1A2,IRS1,STAT5A,THY1	6/64
7_Member	WikiPathways	WP4786	Type I collagen synthesis in the context of osteogenesis imperfecta	-2.11669	-0.845497	649,1277,1278,4015	BMP1,COL1A1,COL1A2,LOX	4/33
7_Member	WikiPathways	WP5144	NRP1-triggered signaling pathways in pancreatic cancer	-2.03259	-0.786461	1277,1278,1490,7043,8829	COL1A1,COL1A2,CCN2,TGFB3,NRP1	5/54
7_Member	Reactome Gene Sets	R-HSA-3000480	Scavenging by Class A Receptors	-2.004	-0.768712	1277,1278,1282	COL1A1,COL1A2,COL4A1	3/19
8_Summary	GO Biological Processes	GO:0040017	positive regulation of locomotion	-12.7981	-9.72831	90,857,958,1277,1435,1601,2149,2152,2260,2335,3162,3491,3678,3688,4067,4162,4323,5054,5328,5336,5420,5743,5764,6678,6776,6789,7018,7057,7070,8613,8829,8840,9353,10253,10457,10509,10630,23473,23587,29108,55140,57118,57381,57698,58515,85360,131578,152007,646960,290,634,800,1278,1282,1289,1295,1464,1490,1893,2049,4015,4017,4240,6443,6444,7026,7127,7534,7763,9289,26585,30008,113026,219699,2535,4609,7…	ACVR1,CAV1,CD40,COL1A1,CSF1,DAB2,F2R,F3,FGFR1,FN1,HMOX1,CCN1,ITGA5,ITGB1,LYN,MCAM,MMP14,SERPINE1,PLAU,PLCG2,PODXL,PTGS2,PTN,SPARC,STAT5A,STK4,TF,THBS1,THY1,PLPP3,NRP1,CCN4,SLIT2,SPRY2,GPNMB,SEMA4B,PDPN,CAPN7,ELP5,PYCARD,ELP3,CAMK1D,RHOJ,SHTN1,SELENOK,SYDE1,LRRC15,GLIPR2,PRSS56,ANPEP,CEACAM1,CALD1,COL1A2,COL4A1,COL5A1,COL8A1,CSPG4,CCN2,ECM1,EPHB3,LOX,LOXL2,MFGE8,SGCB,SGCD,NR2F2,TNFAIP2,YWHAZ,ZFAND…	83/-
8_Member	GO Biological Processes	GO:0040017	positive regulation of locomotion	-12.7981	-9.72831	90,857,958,1277,1435,1601,2149,2152,2260,2335,3162,3491,3678,3688,4067,4162,4323,5054,5328,5336,5420,5743,5764,6678,6776,6789,7018,7057,7070,8613,8829,8840,9353,10253,10457,10509,10630,23473,23587,29108,55140,57118,57381,57698,58515,85360,131578,152007,646960	ACVR1,CAV1,CD40,COL1A1,CSF1,DAB2,F2R,F3,FGFR1,FN1,HMOX1,CCN1,ITGA5,ITGB1,LYN,MCAM,MMP14,SERPINE1,PLAU,PLCG2,PODXL,PTGS2,PTN,SPARC,STAT5A,STK4,TF,THBS1,THY1,PLPP3,NRP1,CCN4,SLIT2,SPRY2,GPNMB,SEMA4B,PDPN,CAPN7,ELP5,PYCARD,ELP3,CAMK1D,RHOJ,SHTN1,SELENOK,SYDE1,LRRC15,GLIPR2,PRSS56	49/608
8_Member	GO Biological Processes	GO:0030335	positive regulation of cell migration	-12.7095	-9.66202	90,857,958,1277,1435,1601,2149,2152,2260,2335,3162,3491,3678,3688,4067,4162,4323,5054,5328,5336,5420,5743,5764,6678,6776,6789,7057,7070,8613,8829,8840,10253,10457,10509,10630,23473,23587,29108,55140,57118,57381,57698,58515,85360,131578,152007,646960	ACVR1,CAV1,CD40,COL1A1,CSF1,DAB2,F2R,F3,FGFR1,FN1,HMOX1,CCN1,ITGA5,ITGB1,LYN,MCAM,MMP14,SERPINE1,PLAU,PLCG2,PODXL,PTGS2,PTN,SPARC,STAT5A,STK4,THBS1,THY1,PLPP3,NRP1,CCN4,SPRY2,GPNMB,SEMA4B,PDPN,CAPN7,ELP5,PYCARD,ELP3,CAMK1D,RHOJ,SHTN1,SELENOK,SYDE1,LRRC15,GLIPR2,PRSS56	47/568
8_Member	GO Biological Processes	GO:2000147	positive regulation of cell motility	-12.6164	-9.59011	90,857,958,1277,1435,1601,2149,2152,2260,2335,3162,3491,3678,3688,4067,4162,4323,5054,5328,5336,5420,5743,5764,6678,6776,6789,7018,7057,7070,8613,8829,8840,10253,10457,10509,10630,23473,23587,29108,55140,57118,57381,57698,58515,85360,131578,152007,646960	ACVR1,CAV1,CD40,COL1A1,CSF1,DAB2,F2R,F3,FGFR1,FN1,HMOX1,CCN1,ITGA5,ITGB1,LYN,MCAM,MMP14,SERPINE1,PLAU,PLCG2,PODXL,PTGS2,PTN,SPARC,STAT5A,STK4,TF,THBS1,THY1,PLPP3,NRP1,CCN4,SPRY2,GPNMB,SEMA4B,PDPN,CAPN7,ELP5,PYCARD,ELP3,CAMK1D,RHOJ,SHTN1,SELENOK,SYDE1,LRRC15,GLIPR2,PRSS56	48/593
8_Member	GO Biological Processes	GO:0001944	vasculature development	-12.4101	-9.44174	90,290,634,800,857,1277,1278,1282,1289,1295,1464,1490,1893,2049,2335,3162,3491,3678,3688,4015,4017,4162,4240,4323,5054,5743,6443,6444,6789,7026,7057,7070,7127,7534,7763,8613,8829,9289,9353,10630,26585,30008,57381,113026,219699	ACVR1,ANPEP,CEACAM1,CALD1,CAV1,COL1A1,COL1A2,COL4A1,COL5A1,COL8A1,CSPG4,CCN2,ECM1,EPHB3,FN1,HMOX1,CCN1,ITGA5,ITGB1,LOX,LOXL2,MCAM,MFGE8,MMP14,SERPINE1,PTGS2,SGCB,SGCD,STK4,NR2F2,THBS1,THY1,TNFAIP2,YWHAZ,ZFAND5,PLPP3,NRP1,ADGRG1,SLIT2,PDPN,GREM1,EFEMP2,RHOJ,PLCD3,UNC5B	45/536
8_Member	GO Biological Processes	GO:0001525	angiogenesis	-11.7338	-8.8324	90,290,634,800,857,1282,1295,1464,1490,1893,2049,2335,3162,3491,3678,3688,4017,4162,4240,4323,5054,5743,6789,7057,7070,7127,7534,8829,9289,9353,26585,57381,113026,219699	ACVR1,ANPEP,CEACAM1,CALD1,CAV1,COL4A1,COL8A1,CSPG4,CCN2,ECM1,EPHB3,FN1,HMOX1,CCN1,ITGA5,ITGB1,LOXL2,MCAM,MFGE8,MMP14,SERPINE1,PTGS2,STK4,THBS1,THY1,TNFAIP2,YWHAZ,NRP1,ADGRG1,SLIT2,GREM1,RHOJ,PLCD3,UNC5B	34/336
8_Member	GO Biological Processes	GO:0035239	tube morphogenesis	-11.5813	-8.70988	90,290,634,800,857,1282,1295,1435,1464,1490,1893,2049,2335,2535,3162,3491,3678,3688,4015,4017,4162,4240,4323,4609,5054,5420,5743,6444,6789,7026,7052,7057,7070,7127,7534,8829,9289,9353,9620,9645,10253,10395,10653,11019,26585,30008,57381,113026,219699,342184	ACVR1,ANPEP,CEACAM1,CALD1,CAV1,COL4A1,COL8A1,CSF1,CSPG4,CCN2,ECM1,EPHB3,FN1,FZD2,HMOX1,CCN1,ITGA5,ITGB1,LOX,LOXL2,MCAM,MFGE8,MMP14,MYC,SERPINE1,PODXL,PTGS2,SGCD,STK4,NR2F2,TGM2,THBS1,THY1,TNFAIP2,YWHAZ,NRP1,ADGRG1,SLIT2,CELSR1,MICAL2,SPRY2,DLC1,SPINT2,LIAS,GREM1,EFEMP2,RHOJ,PLCD3,UNC5B,FMN1	50/679
8_Member	GO Biological Processes	GO:0048514	blood vessel morphogenesis	-11.23	-8.38664	90,290,634,800,857,1282,1295,1464,1490,1893,2049,2335,3162,3491,3678,3688,4015,4017,4162,4240,4323,5054,5743,6444,6789,7026,7057,7070,7127,7534,8829,9289,9353,26585,30008,57381,113026,219699	ACVR1,ANPEP,CEACAM1,CALD1,CAV1,COL4A1,COL8A1,CSPG4,CCN2,ECM1,EPHB3,FN1,HMOX1,CCN1,ITGA5,ITGB1,LOX,LOXL2,MCAM,MFGE8,MMP14,SERPINE1,PTGS2,SGCD,STK4,NR2F2,THBS1,THY1,TNFAIP2,YWHAZ,NRP1,ADGRG1,SLIT2,GREM1,EFEMP2,RHOJ,PLCD3,UNC5B	38/430
8_Member	GO Biological Processes	GO:0001568	blood vessel development	-11.1562	-8.32613	90,290,634,800,857,1277,1278,1282,1289,1295,1464,1490,1893,2049,2335,3162,3491,3678,3688,4015,4017,4162,4240,4323,5054,5743,6444,6789,7026,7057,7070,7127,7534,8613,8829,9289,9353,26585,30008,57381,113026,219699	ACVR1,ANPEP,CEACAM1,CALD1,CAV1,COL1A1,COL1A2,COL4A1,COL5A1,COL8A1,CSPG4,CCN2,ECM1,EPHB3,FN1,HMOX1,CCN1,ITGA5,ITGB1,LOX,LOXL2,MCAM,MFGE8,MMP14,SERPINE1,PTGS2,SGCD,STK4,NR2F2,THBS1,THY1,TNFAIP2,YWHAZ,PLPP3,NRP1,ADGRG1,SLIT2,GREM1,EFEMP2,RHOJ,PLCD3,UNC5B	42/517
9_Summary	GO Biological Processes	GO:0045785	positive regulation of cell adhesion	-12.1493	-9.21576	402,857,960,1295,1307,1435,1601,1725,2199,2335,2650,3491,3572,3678,3913,4067,4860,5420,5795,6595,6604,6657,6789,7052,7070,7168,7412,8613,8829,9289,10211,10630,11117,29108,30008,50848,51571,55679,57580,58515,84034,342184,634,999,2049,4072,5340,5592,5621,9314,10457,10653,80762,84695,558,958,1075,1490,3162,4323,5341,5819,6647,7056,7057,9173,25793,30011,120892,345611,598,1265,26585	ARL2,CAV1,CD44,COL8A1,COL16A1,CSF1,DAB2,DHPS,FBLN2,FN1,GCNT1,CCN1,IL6ST,ITGA5,LAMB2,LYN,PNP,PODXL,PTPRJ,SMARCA2,SMARCD3,SOX2,STK4,TGM2,THY1,TPM1,VCAM1,PLPP3,NRP1,ADGRG1,FLOT1,PDPN,EMILIN1,PYCARD,EFEMP2,F11R,CYRIB,LIMS2,PREX1,SELENOK,EMILIN2,FMN1,CEACAM1,CDH1,EPHB3,EPCAM,PLG,PRKG1,PRNP,KLF4,GPNMB,SPINT2,NDFIP1,LOXL3,AXL,CD40,CTSC,CCN2,HMOX1,MMP14,PLEK,NECTIN2,SOD1,THBD,THBS1,IL1RL1,FBXO7,SH3KBP1,L…	73/-
9_Member	GO Biological Processes	GO:0045785	positive regulation of cell adhesion	-12.1493	-9.21576	402,857,960,1295,1307,1435,1601,1725,2199,2335,2650,3491,3572,3678,3913,4067,4860,5420,5795,6595,6604,6657,6789,7052,7070,7168,7412,8613,8829,9289,10211,10630,11117,29108,30008,50848,51571,55679,57580,58515,84034,342184	ARL2,CAV1,CD44,COL8A1,COL16A1,CSF1,DAB2,DHPS,FBLN2,FN1,GCNT1,CCN1,IL6ST,ITGA5,LAMB2,LYN,PNP,PODXL,PTPRJ,SMARCA2,SMARCD3,SOX2,STK4,TGM2,THY1,TPM1,VCAM1,PLPP3,NRP1,ADGRG1,FLOT1,PDPN,EMILIN1,PYCARD,EFEMP2,F11R,CYRIB,LIMS2,PREX1,SELENOK,EMILIN2,FMN1	42/482
9_Member	GO Biological Processes	GO:0022407	regulation of cell-cell adhesion	-7.38126	-5.04095	634,857,960,999,1725,2049,2650,3572,4067,4072,4860,5340,5420,5592,5621,6595,6604,6657,7070,7412,8613,9314,10211,10457,10630,10653,11117,29108,50848,51571,58515,80762,84034,84695	CEACAM1,CAV1,CD44,CDH1,DHPS,EPHB3,GCNT1,IL6ST,LYN,EPCAM,PNP,PLG,PODXL,PRKG1,PRNP,SMARCA2,SMARCD3,SOX2,THY1,VCAM1,PLPP3,KLF4,FLOT1,GPNMB,PDPN,SPINT2,EMILIN1,PYCARD,F11R,CYRIB,SELENOK,NDFIP1,EMILIN2,LOXL3	34/492
9_Member	GO Biological Processes	GO:0050865	regulation of cell activation	-6.62349	-4.39878	558,634,857,958,1075,1490,1725,2335,3162,3572,4067,4323,4860,5341,5592,5621,5819,6595,6604,6647,7056,7057,7070,7412,9173,10457,10630,11117,25793,29108,30011,50848,51571,58515,80762,84034,84695,120892,345611	AXL,CEACAM1,CAV1,CD40,CTSC,CCN2,DHPS,FN1,HMOX1,IL6ST,LYN,MMP14,PNP,PLEK,PRKG1,PRNP,NECTIN2,SMARCA2,SMARCD3,SOD1,THBD,THBS1,THY1,VCAM1,IL1RL1,GPNMB,PDPN,EMILIN1,FBXO7,PYCARD,SH3KBP1,F11R,CYRIB,SELENOK,NDFIP1,EMILIN2,LOXL3,LRRK2,IRGM	39/657
9_Member	GO Biological Processes	GO:0022409	positive regulation of cell-cell adhesion	-4.94148	-3.02267	857,960,1725,2650,3572,4067,4860,5420,6595,6604,6657,7070,7412,8613,10211,10630,11117,29108,50848,51571,58515,84034	CAV1,CD44,DHPS,GCNT1,IL6ST,LYN,PNP,PODXL,SMARCA2,SMARCD3,SOX2,THY1,VCAM1,PLPP3,FLOT1,PDPN,EMILIN1,PYCARD,F11R,CYRIB,SELENOK,EMILIN2	22/321
9_Member	GO Biological Processes	GO:0050867	positive regulation of cell activation	-4.47194	-2.64583	558,857,958,1075,1490,1725,3572,4067,4323,4860,5341,5819,6595,6604,7057,7070,7412,9173,29108,30011,51571,58515,120892,345611	AXL,CAV1,CD40,CTSC,CCN2,DHPS,IL6ST,LYN,MMP14,PNP,PLEK,NECTIN2,SMARCA2,SMARCD3,THBS1,THY1,VCAM1,IL1RL1,PYCARD,SH3KBP1,CYRIB,SELENOK,LRRK2,IRGM	24/395
9_Member	GO Biological Processes	GO:0002694	regulation of leukocyte activation	-4.22555	-2.45333	558,634,857,958,1075,1725,2335,3162,3572,4067,4323,4860,5621,5819,6595,6604,6647,7057,7070,7412,9173,10457,25793,29108,30011,51571,58515,80762,84695,120892,345611	AXL,CEACAM1,CAV1,CD40,CTSC,DHPS,FN1,HMOX1,IL6ST,LYN,MMP14,PNP,PRNP,NECTIN2,SMARCA2,SMARCD3,SOD1,THBS1,THY1,VCAM1,IL1RL1,GPNMB,FBXO7,PYCARD,SH3KBP1,CYRIB,SELENOK,NDFIP1,LOXL3,LRRK2,IRGM	31/600
9_Member	GO Biological Processes	GO:0002696	positive regulation of leukocyte activation	-3.88065	-2.17948	558,857,958,1075,1725,3572,4067,4323,4860,5819,6595,6604,7057,7070,7412,9173,29108,30011,51571,58515,120892,345611	AXL,CAV1,CD40,CTSC,DHPS,IL6ST,LYN,MMP14,PNP,NECTIN2,SMARCA2,SMARCD3,THBS1,THY1,VCAM1,IL1RL1,PYCARD,SH3KBP1,CYRIB,SELENOK,LRRK2,IRGM	22/378
9_Member	GO Biological Processes	GO:1903037	regulation of leukocyte cell-cell adhesion	-3.04717	-1.53112	634,857,960,1725,2650,3572,4067,4860,5621,6595,6604,7070,7412,9314,10457,29108,51571,58515,80762,84695	CEACAM1,CAV1,CD44,DHPS,GCNT1,IL6ST,LYN,PNP,PRNP,SMARCA2,SMARCD3,THY1,VCAM1,KLF4,GPNMB,PYCARD,CYRIB,SELENOK,NDFIP1,LOXL3	20/379
9_Member	GO Biological Processes	GO:0070663	regulation of leukocyte proliferation	-2.66704	-1.24431	598,958,1265,1435,1725,3572,4067,4860,5621,7412,10457,26585,29108,58515,80762	BCL2L1,CD40,CNN2,CSF1,DHPS,IL6ST,LYN,PNP,PRNP,VCAM1,GPNMB,GREM1,PYCARD,SELENOK,NDFIP1	15/268
9_Member	GO Biological Processes	GO:0051249	regulation of lymphocyte activation	-2.58465	-1.18606	558,634,857,958,1725,3572,4067,4323,4860,5621,6595,6604,6647,7070,7412,10457,25793,29108,30011,51571,58515,80762,84695	AXL,CEACAM1,CAV1,CD40,DHPS,IL6ST,LYN,MMP14,PNP,PRNP,SMARCA2,SMARCD3,SOD1,THY1,VCAM1,GPNMB,FBXO7,PYCARD,SH3KBP1,CYRIB,SELENOK,NDFIP1,LOXL3	23/504
9_Member	GO Biological Processes	GO:0050863	regulation of T cell activation	-2.32734	-1.0008	634,857,1725,3572,4067,4860,5621,6595,6604,6647,7070,7412,10457,29108,51571,58515,80762,84695	CEACAM1,CAV1,DHPS,IL6ST,LYN,PNP,PRNP,SMARCA2,SMARCD3,SOD1,THY1,VCAM1,GPNMB,PYCARD,CYRIB,SELENOK,NDFIP1,LOXL3	18/378
9_Member	GO Biological Processes	GO:0051251	positive regulation of lymphocyte activation	-2.23735	-0.935077	558,857,958,1725,3572,4067,4323,4860,6595,6604,7070,7412,29108,30011,51571,58515	AXL,CAV1,CD40,DHPS,IL6ST,LYN,MMP14,PNP,SMARCA2,SMARCD3,THY1,VCAM1,PYCARD,SH3KBP1,CYRIB,SELENOK	16/327
9_Member	GO Biological Processes	GO:0032944	regulation of mononuclear cell proliferation	-2.22255	-0.921266	598,958,1435,1725,3572,4067,4860,5621,7412,10457,29108,58515,80762	BCL2L1,CD40,CSF1,DHPS,IL6ST,LYN,PNP,PRNP,VCAM1,GPNMB,PYCARD,SELENOK,NDFIP1	13/243
9_Member	GO Biological Processes	GO:1903039	positive regulation of leukocyte cell-cell adhesion	-2.1942	-0.905581	857,960,1725,2650,3572,4067,4860,6595,6604,7070,7412,29108,51571,58515	CAV1,CD44,DHPS,GCNT1,IL6ST,LYN,PNP,SMARCA2,SMARCD3,THY1,VCAM1,PYCARD,CYRIB,SELENOK	14/273
9_Member	GO Biological Processes	GO:0070665	positive regulation of leukocyte proliferation	-2.16701	-0.882914	598,958,1435,1725,3572,4067,4860,7412,29108,58515	BCL2L1,CD40,CSF1,DHPS,IL6ST,LYN,PNP,VCAM1,PYCARD,SELENOK	10/166
9_Member	GO Biological Processes	GO:0032946	positive regulation of mononuclear cell proliferation	-2.02606	-0.782843	598,958,1435,1725,3572,4860,7412,29108,58515	BCL2L1,CD40,CSF1,DHPS,IL6ST,PNP,VCAM1,PYCARD,SELENOK	9/148
10_Summary	GO Biological Processes	GO:0006399	tRNA metabolic process	-11.0606	-8.25491	4141,6894,10557,10799,23587,27037,51095,54888,55140,55152,57176,64172,79693,80222,80746,84705,91801,92675,92935,112970,113179,123283,131965,134637,142940,104,6628,27079,29081,55783,83640,164668,196074,2068,3692,10360,10438,54853,55781,79664,79863,85395,130916,1788,2593,4548,4552,4800,7172,10322,28989,56980,57673,79918,84274,118881,138199,221656	MARS1,TARBP1,RPP38,RPP40,ELP5,TRMT2A,TRNT1,NSUN2,ELP3,DALRD3,VARS2,OSGEPL1,YRDC,TARS2,TSEN2,GTPBP3,ALKBH8,DTD1,MARS2,KTI12,ADAT3,TARS3,METTL6,ADAT2,TRUB1,ADARB1,SNRPB,RPUSD2,METTL5,CMTR2,RAMAC,APOBEC3H,METTL15,ERCC2,EIF6,NPM3,C1D,WDR55,RIOK2,ICE2,RBFA,SLX9,MTERF4,DNMT3A,GAMT,MTR,MTRR,NFYA,TPMT,SMYD5,NTMT1,PRDM10,BEND3,SETD6,COQ5,COMTD1,CARNMT1,KDM1B	58/-
10_Member	GO Biological Processes	GO:0006399	tRNA metabolic process	-11.0606	-8.25491	4141,6894,10557,10799,23587,27037,51095,54888,55140,55152,57176,64172,79693,80222,80746,84705,91801,92675,92935,112970,113179,123283,131965,134637,142940	MARS1,TARBP1,RPP38,RPP40,ELP5,TRMT2A,TRNT1,NSUN2,ELP3,DALRD3,VARS2,OSGEPL1,YRDC,TARS2,TSEN2,GTPBP3,ALKBH8,DTD1,MARS2,KTI12,ADAT3,TARS3,METTL6,ADAT2,TRUB1	25/194
10_Member	GO Biological Processes	GO:0009451	RNA modification	-9.4101	-6.77754	104,6628,6894,23587,27037,27079,29081,54888,55140,55152,55783,64172,79693,83640,84705,91801,112970,131965,134637,142940,164668,196074	ADARB1,SNRPB,TARBP1,ELP5,TRMT2A,RPUSD2,METTL5,NSUN2,ELP3,DALRD3,CMTR2,OSGEPL1,YRDC,RAMAC,GTPBP3,ALKBH8,KTI12,METTL6,ADAT2,TRUB1,APOBEC3H,METTL15	22/179
10_Member	GO Biological Processes	GO:0008033	tRNA processing	-9.277	-6.66084	6894,10557,10799,23587,27037,51095,54888,55140,55152,64172,79693,80746,84705,91801,112970,113179,131965,134637,142940	TARBP1,RPP38,RPP40,ELP5,TRMT2A,TRNT1,NSUN2,ELP3,DALRD3,OSGEPL1,YRDC,TSEN2,GTPBP3,ALKBH8,KTI12,ADAT3,METTL6,ADAT2,TRUB1	19/134
10_Member	GO Biological Processes	GO:0034660	ncRNA metabolic process	-8.84205	-6.27761	2068,3692,4141,6894,10360,10438,10557,10799,23587,27037,27079,29081,51095,54853,54888,55140,55152,55781,57176,64172,79664,79693,79863,80222,80746,84705,85395,91801,92675,92935,112970,113179,123283,130916,131965,134637,142940,196074	ERCC2,EIF6,MARS1,TARBP1,NPM3,C1D,RPP38,RPP40,ELP5,TRMT2A,RPUSD2,METTL5,TRNT1,WDR55,NSUN2,ELP3,DALRD3,RIOK2,VARS2,OSGEPL1,ICE2,YRDC,RBFA,TARS2,TSEN2,GTPBP3,SLX9,ALKBH8,DTD1,MARS2,KTI12,ADAT3,TARS3,MTERF4,METTL6,ADAT2,TRUB1,METTL15	38/520
10_Member	GO Biological Processes	GO:0032259	methylation	-8.32978	-5.83032	1788,2593,4548,4552,4800,6628,6894,7172,10322,27037,28989,29081,54888,55152,55783,56980,57673,79918,83640,84274,84705,91801,118881,131965,138199,196074,221656	DNMT3A,GAMT,MTR,MTRR,NFYA,SNRPB,TARBP1,TPMT,SMYD5,TRMT2A,NTMT1,METTL5,NSUN2,DALRD3,CMTR2,PRDM10,BEND3,SETD6,RAMAC,COQ5,GTPBP3,ALKBH8,COMTD1,METTL6,CARNMT1,METTL15,KDM1B	27/300
10_Member	GO Biological Processes	GO:0034470	ncRNA processing	-7.49568	-5.12484	2068,3692,6894,10360,10438,10557,10799,23587,27037,27079,29081,51095,54853,54888,55140,55152,55781,64172,79693,79863,80746,84705,85395,91801,112970,113179,130916,131965,134637,142940,196074	ERCC2,EIF6,TARBP1,NPM3,C1D,RPP38,RPP40,ELP5,TRMT2A,RPUSD2,METTL5,TRNT1,WDR55,NSUN2,ELP3,DALRD3,RIOK2,OSGEPL1,YRDC,RBFA,TSEN2,GTPBP3,SLX9,ALKBH8,KTI12,ADAT3,MTERF4,METTL6,ADAT2,TRUB1,METTL15	31/417
10_Member	GO Biological Processes	GO:0006400	tRNA modification	-7.28012	-4.97151	6894,23587,27037,54888,55140,55152,64172,79693,84705,91801,112970,131965,134637,142940	TARBP1,ELP5,TRMT2A,NSUN2,ELP3,DALRD3,OSGEPL1,YRDC,GTPBP3,ALKBH8,KTI12,METTL6,ADAT2,TRUB1	14/94
10_Member	GO Biological Processes	GO:0001510	RNA methylation	-5.69637	-3.63784	6628,6894,27037,29081,54888,55152,55783,83640,84705,91801,131965,196074	SNRPB,TARBP1,TRMT2A,METTL5,NSUN2,DALRD3,CMTR2,RAMAC,GTPBP3,ALKBH8,METTL6,METTL15	12/92
10_Member	GO Biological Processes	GO:0043414	macromolecule methylation	-5.61895	-3.57142	1788,4552,4800,6628,6894,10322,27037,28989,29081,54888,55152,55783,57673,79918,83640,84705,91801,131965,196074,221656	DNMT3A,MTRR,NFYA,SNRPB,TARBP1,SMYD5,TRMT2A,NTMT1,METTL5,NSUN2,DALRD3,CMTR2,BEND3,SETD6,RAMAC,GTPBP3,ALKBH8,METTL6,METTL15,KDM1B	20/247
10_Member	GO Biological Processes	GO:0030488	tRNA methylation	-4.24834	-2.47497	6894,27037,54888,55152,84705,91801,131965	TARBP1,TRMT2A,NSUN2,DALRD3,GTPBP3,ALKBH8,METTL6	7/42
10_Member	Reactome Gene Sets	R-HSA-72306	tRNA processing	-2.96483	-1.47264	10557,10799,51095,54888,80746,84705,91801,113179,134637	RPP38,RPP40,TRNT1,NSUN2,TSEN2,GTPBP3,ALKBH8,ADAT3,ADAT2	9/107
11_Summary	GO Biological Processes	GO:0007229	integrin-mediated signaling pathway	-11.0594	-8.25491	634,1307,1490,2335,3055,3678,3688,3691,3694,5341,5764,7070,7791,8613,8829,22801,55679,55920,558,960,967,2049,7412,10391,10395,10580,11117,79834	CEACAM1,COL16A1,CCN2,FN1,HCK,ITGA5,ITGB1,ITGB4,ITGB6,PLEK,PTN,THY1,ZYX,PLPP3,NRP1,ITGA11,LIMS2,RCC2,AXL,CD44,CD63,EPHB3,VCAM1,CORO2B,DLC1,SORBS1,EMILIN1,PEAK1	28/-
11_Member	GO Biological Processes	GO:0007229	integrin-mediated signaling pathway	-11.0594	-8.25491	634,1307,1490,2335,3055,3678,3688,3691,3694,5341,5764,7070,7791,8613,8829,22801,55679,55920	CEACAM1,COL16A1,CCN2,FN1,HCK,ITGA5,ITGB1,ITGB4,ITGB6,PLEK,PTN,THY1,ZYX,PLPP3,NRP1,ITGA11,LIMS2,RCC2	18/94
11_Member	GO Biological Processes	GO:0031589	cell-substrate adhesion	-8.38005	-5.85757	558,960,967,1490,2049,2335,3678,3688,3691,3694,7070,7412,7791,8829,10391,10395,10580,11117,22801,55920,79834	AXL,CD44,CD63,CCN2,EPHB3,FN1,ITGA5,ITGB1,ITGB4,ITGB6,THY1,VCAM1,ZYX,NRP1,CORO2B,DLC1,SORBS1,EMILIN1,ITGA11,RCC2,PEAK1	21/185
11_Member	GO Biological Processes	GO:0007160	cell-matrix adhesion	-8.33368	-5.83032	960,967,1490,2335,3678,3688,3691,3694,7070,7412,7791,10391,10395,10580,11117,22801,55920,79834	CD44,CD63,CCN2,FN1,ITGA5,ITGB1,ITGB4,ITGB6,THY1,VCAM1,ZYX,CORO2B,DLC1,SORBS1,EMILIN1,ITGA11,RCC2,PEAK1	18/136
11_Member	GO Biological Processes	GO:0007044	cell-substrate junction assembly	-6.4662	-4.2834	2335,3678,3691,7070,10391,10395,10580,55920,79834	FN1,ITGA5,ITGB4,THY1,CORO2B,DLC1,SORBS1,RCC2,PEAK1	9/40
11_Member	GO Biological Processes	GO:0150115	cell-substrate junction organization	-6.27237	-4.13064	2335,3678,3691,7070,10391,10395,10580,55920,79834	FN1,ITGA5,ITGB4,THY1,CORO2B,DLC1,SORBS1,RCC2,PEAK1	9/42
11_Member	GO Biological Processes	GO:0048041	focal adhesion assembly	-4.26527	-2.48492	7070,10391,10395,10580,55920,79834	THY1,CORO2B,DLC1,SORBS1,RCC2,PEAK1	6/29
12_Summary	GO Biological Processes	GO:0032989	cellular component morphogenesis	-10.8111	-8.03076	58,104,598,1465,2049,2068,2596,3251,3688,3691,3800,3856,3880,3913,4629,4684,5592,5764,5797,5819,6383,6586,6642,7168,7345,8829,9353,10211,10381,10398,10458,10509,10857,23022,23181,23768,25802,26011,51347,56896,57498,57698,91624,120892,219699,999,2195,3694,6647,6789,7428,10653,23218,26585,2670,3371,4067,4548,10298,11075,1280,1282,1287,1289,1290,1741,2260,3678,3983,4665,5621,6134,9978,10818,25791,30…	ACTA1,ADARB1,BCL2L1,CSRP1,EPHB3,ERCC2,GAP43,HPRT1,ITGB1,ITGB4,KIF5C,KRT8,KRT19,LAMB2,MYH11,NCAM1,PRKG1,PTN,PTPRM,NECTIN2,SDC2,SLIT3,SNX1,TPM1,UCHL1,NRP1,SLIT2,FLOT1,TUBB3,MYL9,BAIAP2,SEMA4B,PGRMC1,PALLD,DIP2A,FLRT2,LMOD1,TENM4,TAOK3,DPYSL5,KIDINS220,SHTN1,NEXN,LRRK2,UNC5B,CDH1,FAT1,ITGB6,SOD1,STK4,VHL,SPINT2,NBEAL2,GREM1,GFAP,TNC,LYN,MTR,PAK4,STMN2,COL2A1,COL4A1,COL4A5,COL5A1,COL5A2,DLG3,FGFR1,IT…	91/-
12_Member	GO Biological Processes	GO:0032989	cellular component morphogenesis	-10.8111	-8.03076	58,104,598,1465,2049,2068,2596,3251,3688,3691,3800,3856,3880,3913,4629,4684,5592,5764,5797,5819,6383,6586,6642,7168,7345,8829,9353,10211,10381,10398,10458,10509,10857,23022,23181,23768,25802,26011,51347,56896,57498,57698,91624,120892,219699	ACTA1,ADARB1,BCL2L1,CSRP1,EPHB3,ERCC2,GAP43,HPRT1,ITGB1,ITGB4,KIF5C,KRT8,KRT19,LAMB2,MYH11,NCAM1,PRKG1,PTN,PTPRM,NECTIN2,SDC2,SLIT3,SNX1,TPM1,UCHL1,NRP1,SLIT2,FLOT1,TUBB3,MYL9,BAIAP2,SEMA4B,PGRMC1,PALLD,DIP2A,FLRT2,LMOD1,TENM4,TAOK3,DPYSL5,KIDINS220,SHTN1,NEXN,LRRK2,UNC5B	45/597
12_Member	GO Biological Processes	GO:0000902	cell morphogenesis	-7.63204	-5.24727	104,999,2049,2195,2596,3251,3688,3694,3800,3913,4684,5592,5764,5797,6383,6586,6642,6647,6789,7345,7428,8829,9353,10211,10381,10458,10509,10653,10857,23022,23181,23218,23768,26585,51347,56896,57498,57698,91624,120892,219699	ADARB1,CDH1,EPHB3,FAT1,GAP43,HPRT1,ITGB1,ITGB6,KIF5C,LAMB2,NCAM1,PRKG1,PTN,PTPRM,SDC2,SLIT3,SNX1,SOD1,STK4,UCHL1,VHL,NRP1,SLIT2,FLOT1,TUBB3,BAIAP2,SEMA4B,SPINT2,PGRMC1,PALLD,DIP2A,NBEAL2,FLRT2,GREM1,TAOK3,DPYSL5,KIDINS220,SHTN1,NEXN,LRRK2,UNC5B	41/651
12_Member	GO Biological Processes	GO:0032990	cell part morphogenesis	-7.33877	-5.0068	104,598,2049,2596,3251,3688,3800,3913,4684,5592,5764,5797,5819,6383,6586,6642,7345,8829,9353,10211,10381,10458,10509,10857,23022,23181,23768,51347,56896,57498,57698,91624,120892,219699	ADARB1,BCL2L1,EPHB3,GAP43,HPRT1,ITGB1,KIF5C,LAMB2,NCAM1,PRKG1,PTN,PTPRM,NECTIN2,SDC2,SLIT3,SNX1,UCHL1,NRP1,SLIT2,FLOT1,TUBB3,BAIAP2,SEMA4B,PGRMC1,PALLD,DIP2A,FLRT2,TAOK3,DPYSL5,KIDINS220,SHTN1,NEXN,LRRK2,UNC5B	34/494
12_Member	GO Biological Processes	GO:0000904	cell morphogenesis involved in differentiation	-6.86055	-4.59949	104,2049,2195,2596,3251,3688,3800,3913,4684,5592,5764,5797,6383,6586,6647,7345,8829,9353,10211,10381,10458,10509,10653,10857,23022,23181,23218,23768,56896,57498,57698,91624,219699	ADARB1,EPHB3,FAT1,GAP43,HPRT1,ITGB1,KIF5C,LAMB2,NCAM1,PRKG1,PTN,PTPRM,SDC2,SLIT3,SOD1,UCHL1,NRP1,SLIT2,FLOT1,TUBB3,BAIAP2,SEMA4B,SPINT2,PGRMC1,PALLD,DIP2A,NBEAL2,FLRT2,DPYSL5,KIDINS220,SHTN1,NEXN,UNC5B	33/493
12_Member	GO Biological Processes	GO:0120039	plasma membrane bounded cell projection morphogenesis	-6.85814	-4.59949	104,2049,2596,3251,3688,3800,3913,4684,5592,5764,5797,6383,6586,6642,7345,8829,9353,10211,10381,10458,10509,10857,23022,23181,23768,51347,56896,57498,57698,91624,120892,219699	ADARB1,EPHB3,GAP43,HPRT1,ITGB1,KIF5C,LAMB2,NCAM1,PRKG1,PTN,PTPRM,SDC2,SLIT3,SNX1,UCHL1,NRP1,SLIT2,FLOT1,TUBB3,BAIAP2,SEMA4B,PGRMC1,PALLD,DIP2A,FLRT2,TAOK3,DPYSL5,KIDINS220,SHTN1,NEXN,LRRK2,UNC5B	32/469
12_Member	GO Biological Processes	GO:0048667	cell morphogenesis involved in neuron differentiation	-6.82784	-4.57619	104,2049,2596,3251,3688,3800,3913,4684,5592,5764,5797,6383,6586,6647,7345,8829,9353,10211,10381,10458,10509,10857,23022,23181,23768,56896,57498,57698,91624,219699	ADARB1,EPHB3,GAP43,HPRT1,ITGB1,KIF5C,LAMB2,NCAM1,PRKG1,PTN,PTPRM,SDC2,SLIT3,SOD1,UCHL1,NRP1,SLIT2,FLOT1,TUBB3,BAIAP2,SEMA4B,PGRMC1,PALLD,DIP2A,FLRT2,DPYSL5,KIDINS220,SHTN1,NEXN,UNC5B	30/423
12_Member	GO Biological Processes	GO:0048858	cell projection morphogenesis	-6.75445	-4.51577	104,2049,2596,3251,3688,3800,3913,4684,5592,5764,5797,6383,6586,6642,7345,8829,9353,10211,10381,10458,10509,10857,23022,23181,23768,51347,56896,57498,57698,91624,120892,219699	ADARB1,EPHB3,GAP43,HPRT1,ITGB1,KIF5C,LAMB2,NCAM1,PRKG1,PTN,PTPRM,SDC2,SLIT3,SNX1,UCHL1,NRP1,SLIT2,FLOT1,TUBB3,BAIAP2,SEMA4B,PGRMC1,PALLD,DIP2A,FLRT2,TAOK3,DPYSL5,KIDINS220,SHTN1,NEXN,LRRK2,UNC5B	32/474
12_Member	GO Biological Processes	GO:0048812	neuron projection morphogenesis	-6.46464	-4.2834	104,2049,2596,3251,3688,3800,3913,4684,5592,5764,5797,6383,6586,7345,8829,9353,10211,10381,10458,10509,10857,23022,23181,23768,51347,56896,57498,57698,91624,120892,219699	ADARB1,EPHB3,GAP43,HPRT1,ITGB1,KIF5C,LAMB2,NCAM1,PRKG1,PTN,PTPRM,SDC2,SLIT3,UCHL1,NRP1,SLIT2,FLOT1,TUBB3,BAIAP2,SEMA4B,PGRMC1,PALLD,DIP2A,FLRT2,TAOK3,DPYSL5,KIDINS220,SHTN1,NEXN,LRRK2,UNC5B	31/464
12_Member	GO Biological Processes	GO:0031175	neuron projection development	-6.40864	-4.25041	104,999,2049,2596,2670,3251,3371,3688,3800,3913,4067,4548,4684,5592,5764,5797,6383,6586,6647,7345,8829,9353,10211,10298,10381,10458,10509,10857,11075,23022,23181,23768,51347,56896,57498,57698,91624,120892,219699	ADARB1,CDH1,EPHB3,GAP43,GFAP,HPRT1,TNC,ITGB1,KIF5C,LAMB2,LYN,MTR,NCAM1,PRKG1,PTN,PTPRM,SDC2,SLIT3,SOD1,UCHL1,NRP1,SLIT2,FLOT1,PAK4,TUBB3,BAIAP2,SEMA4B,PGRMC1,STMN2,PALLD,DIP2A,FLRT2,TAOK3,DPYSL5,KIDINS220,SHTN1,NEXN,LRRK2,UNC5B	39/670
12_Member	Reactome Gene Sets	R-HSA-9675108	Nervous system development	-5.76457	-3.68553	1280,1282,1287,1289,1290,1741,2049,2260,2596,3678,3688,3983,4067,4629,4665,4684,5621,6134,6383,6586,8829,9353,9978,10298,10381,10398,10818,25791,30011,56896,57698,103910,200916,219699	COL2A1,COL4A1,COL4A5,COL5A1,COL5A2,DLG3,EPHB3,FGFR1,GAP43,ITGA5,ITGB1,ABLIM1,LYN,MYH11,NAB2,NCAM1,PRNP,RPL10,SDC2,SLIT3,NRP1,SLIT2,RBX1,PAK4,TUBB3,MYL9,FRS2,NGEF,SH3KBP1,DPYSL5,SHTN1,MYL12B,RPL22L1,UNC5B	34/578
12_Member	Reactome Gene Sets	R-HSA-422475	Axon guidance	-5.74704	-3.67494	1280,1282,1287,1289,1290,1741,2049,2260,2596,3678,3688,3983,4067,4629,4684,5621,6134,6383,6586,8829,9353,9978,10298,10381,10398,10818,25791,30011,56896,57698,103910,200916,219699	COL2A1,COL4A1,COL4A5,COL5A1,COL5A2,DLG3,EPHB3,FGFR1,GAP43,ITGA5,ITGB1,ABLIM1,LYN,MYH11,NCAM1,PRNP,RPL10,SDC2,SLIT3,NRP1,SLIT2,RBX1,PAK4,TUBB3,MYL9,FRS2,NGEF,SH3KBP1,DPYSL5,SHTN1,MYL12B,RPL22L1,UNC5B	33/553
12_Member	GO Biological Processes	GO:0007409	axonogenesis	-5.29552	-3.31057	104,2049,2596,3688,3800,3913,4684,5592,5797,6586,7345,8829,9353,10211,10381,10458,10509,10857,23022,23768,56896,57698,91624,219699	ADARB1,EPHB3,GAP43,ITGB1,KIF5C,LAMB2,NCAM1,PRKG1,PTPRM,SLIT3,UCHL1,NRP1,SLIT2,FLOT1,TUBB3,BAIAP2,SEMA4B,PGRMC1,PALLD,FLRT2,DPYSL5,SHTN1,NEXN,UNC5B	24/352
12_Member	GO Biological Processes	GO:0061564	axon development	-5.15481	-3.19718	104,2049,2596,3371,3688,3800,3913,4548,4684,5592,5797,6586,7345,8829,9353,10211,10381,10458,10509,10857,23022,23768,56896,57698,91624,219699	ADARB1,EPHB3,GAP43,TNC,ITGB1,KIF5C,LAMB2,MTR,NCAM1,PRKG1,PTPRM,SLIT3,UCHL1,NRP1,SLIT2,FLOT1,TUBB3,BAIAP2,SEMA4B,PGRMC1,PALLD,FLRT2,DPYSL5,SHTN1,NEXN,UNC5B	26/408
12_Member	KEGG Pathway	hsa04360	Axon guidance	-5.0661	-3.12408	2049,3688,3983,5336,6586,8829,9353,10298,10398,10509,25791,54961,56896,84552,103910,219699	EPHB3,ITGB1,ABLIM1,PLCG2,SLIT3,NRP1,SLIT2,PAK4,MYL9,SEMA4B,NGEF,SSH3,DPYSL5,PARD6G,MYL12B,UNC5B	16/182
12_Member	GO Biological Processes	GO:0007411	axon guidance	-4.58232	-2.73755	2049,2596,3800,3913,4684,5797,6586,8829,9353,10381,10509,10857,23022,23768,56896,91624,219699	EPHB3,GAP43,KIF5C,LAMB2,NCAM1,PTPRM,SLIT3,NRP1,SLIT2,TUBB3,SEMA4B,PGRMC1,PALLD,FLRT2,DPYSL5,NEXN,UNC5B	17/221
12_Member	GO Biological Processes	GO:0097485	neuron projection guidance	-4.58232	-2.73755	2049,2596,3800,3913,4684,5797,6586,8829,9353,10381,10509,10857,23022,23768,56896,91624,219699	EPHB3,GAP43,KIF5C,LAMB2,NCAM1,PTPRM,SLIT3,NRP1,SLIT2,TUBB3,SEMA4B,PGRMC1,PALLD,FLRT2,DPYSL5,NEXN,UNC5B	17/221
12_Member	GO Biological Processes	GO:0006935	chemotaxis	-4.32328	-2.53103	409,1525,2049,2596,3491,3800,3913,4015,4684,5328,5337,5764,5795,5797,6586,7412,8829,9353,10381,10457,10509,10857,23022,23768,56896,57580,91624,219699	ARRB2,CXADR,EPHB3,GAP43,CCN1,KIF5C,LAMB2,LOX,NCAM1,PLAU,PLD1,PTN,PTPRJ,PTPRM,SLIT3,VCAM1,NRP1,SLIT2,TUBB3,GPNMB,SEMA4B,PGRMC1,PALLD,FLRT2,DPYSL5,PREX1,NEXN,UNC5B	28/510
12_Member	GO Biological Processes	GO:0042330	taxis	-4.2938	-2.50669	409,1525,2049,2596,3491,3800,3913,4015,4684,5328,5337,5764,5795,5797,6586,7412,8829,9353,10381,10457,10509,10857,23022,23768,56896,57580,91624,219699	ARRB2,CXADR,EPHB3,GAP43,CCN1,KIF5C,LAMB2,LOX,NCAM1,PLAU,PLD1,PTN,PTPRJ,PTPRM,SLIT3,VCAM1,NRP1,SLIT2,TUBB3,GPNMB,SEMA4B,PGRMC1,PALLD,FLRT2,DPYSL5,PREX1,NEXN,UNC5B	28/512
12_Member	GO Biological Processes	GO:0040011	locomotion	-4.037	-2.30333	409,1525,2049,2596,3491,3800,3913,4015,4684,5328,5337,5764,5795,5797,6586,7412,8829,9353,10381,10457,10509,10857,23022,23768,56896,57580,91624,219699	ARRB2,CXADR,EPHB3,GAP43,CCN1,KIF5C,LAMB2,LOX,NCAM1,PLAU,PLD1,PTN,PTPRJ,PTPRM,SLIT3,VCAM1,NRP1,SLIT2,TUBB3,GPNMB,SEMA4B,PGRMC1,PALLD,FLRT2,DPYSL5,PREX1,NEXN,UNC5B	28/530
13_Summary	GO Biological Processes	GO:0031032	actomyosin structure organization	-10.4566	-7.69909	58,408,1264,1265,1266,1465,3688,3856,3880,4629,7126,7168,7791,10398,10580,10788,25802,50848,55561,2068,3691,5819,26011,3692,6134,11200,23761,26284,27229,51335,54475,55052,56647,84273,126353,130916	ACTA1,ARRB1,CNN1,CNN2,CNN3,CSRP1,ITGB1,KRT8,KRT19,MYH11,TNFAIP1,TPM1,ZYX,MYL9,SORBS1,IQGAP2,LMOD1,F11R,CDC42BPG,ERCC2,ITGB4,NECTIN2,TENM4,EIF6,RPL10,CHEK2,PISD,ERAL1,TUBGCP4,NGRN,NLE1,MRPL20,BCCIP,NOA1,MISP,MTERF4	36/-
13_Member	GO Biological Processes	GO:0031032	actomyosin structure organization	-10.4566	-7.69909	58,408,1264,1265,1266,1465,3688,3856,3880,4629,7126,7168,7791,10398,10580,10788,25802,50848,55561	ACTA1,ARRB1,CNN1,CNN2,CNN3,CSRP1,ITGB1,KRT8,KRT19,MYH11,TNFAIP1,TPM1,ZYX,MYL9,SORBS1,IQGAP2,LMOD1,F11R,CDC42BPG	19/115
13_Member	GO Biological Processes	GO:0010927	cellular component assembly involved in morphogenesis	-5.40861	-3.40835	58,1465,2068,3688,3691,3856,3880,4629,5819,7168,10398,25802,26011	ACTA1,CSRP1,ERCC2,ITGB1,ITGB4,KRT8,KRT19,MYH11,NECTIN2,TPM1,MYL9,LMOD1,TENM4	13/115
13_Member	GO Biological Processes	GO:0140694	non-membrane-bounded organelle assembly	-4.87856	-2.96933	58,1465,3688,3692,3856,3880,4629,6134,7168,10398,11200,23761,25802,26284,27229,51335,54475,55052,56647,84273,126353,130916	ACTA1,CSRP1,ITGB1,EIF6,KRT8,KRT19,MYH11,RPL10,TPM1,MYL9,CHEK2,PISD,LMOD1,ERAL1,TUBGCP4,NGRN,NLE1,MRPL20,BCCIP,NOA1,MISP,MTERF4	22/324
13_Member	GO Biological Processes	GO:0030239	myofibril assembly	-4.68502	-2.81214	58,1465,3688,3856,3880,4629,7168,10398,25802	ACTA1,CSRP1,ITGB1,KRT8,KRT19,MYH11,TPM1,MYL9,LMOD1	9/64
13_Member	GO Biological Processes	GO:0055002	striated muscle cell development	-4.62952	-2.7765	58,1465,3688,3856,3880,4629,7168,10398,25802	ACTA1,CSRP1,ITGB1,KRT8,KRT19,MYH11,TPM1,MYL9,LMOD1	9/65
13_Member	GO Biological Processes	GO:0045214	sarcomere organization	-2.69649	-1.26967	1465,3688,3856,3880,7168	CSRP1,ITGB1,KRT8,KRT19,TPM1	5/38
14_Summary	GO Biological Processes	GO:0048729	tissue morphogenesis	-10.4394	-7.69292	58,90,104,634,960,1282,1289,1301,1435,1741,1832,2195,2535,2650,3371,3491,3678,3688,3691,3868,3872,4323,4609,5420,6789,7041,7052,7168,8091,8829,9314,9353,9620,9645,10253,10395,10630,10653,10818,11019,26585,30008,342184,7534	ACTA1,ACVR1,ADARB1,CEACAM1,CD44,COL4A1,COL5A1,COL11A1,CSF1,DLG3,DSP,FAT1,FZD2,GCNT1,TNC,CCN1,ITGA5,ITGB1,ITGB4,KRT16,KRT17,MMP14,MYC,PODXL,STK4,TGFB1I1,TGM2,TPM1,HMGA2,NRP1,KLF4,SLIT2,CELSR1,MICAL2,SPRY2,DLC1,PDPN,SPINT2,FRS2,LIAS,GREM1,EFEMP2,FMN1,YWHAZ	44/-
14_Member	GO Biological Processes	GO:0048729	tissue morphogenesis	-10.4394	-7.69292	58,90,104,634,960,1282,1289,1301,1435,1741,1832,2195,2535,2650,3371,3491,3678,3688,3691,3868,3872,4323,4609,5420,6789,7041,7052,7168,8091,8829,9314,9353,9620,9645,10253,10395,10630,10653,10818,11019,26585,30008,342184	ACTA1,ACVR1,ADARB1,CEACAM1,CD44,COL4A1,COL5A1,COL11A1,CSF1,DLG3,DSP,FAT1,FZD2,GCNT1,TNC,CCN1,ITGA5,ITGB1,ITGB4,KRT16,KRT17,MMP14,MYC,PODXL,STK4,TGFB1I1,TGM2,TPM1,HMGA2,NRP1,KLF4,SLIT2,CELSR1,MICAL2,SPRY2,DLC1,PDPN,SPINT2,FRS2,LIAS,GREM1,EFEMP2,FMN1	43/567
14_Member	GO Biological Processes	GO:0002009	morphogenesis of an epithelium	-8.28903	-5.79781	90,634,960,1282,1289,1435,1741,2195,2535,3371,3491,3678,3688,3868,3872,4323,4609,5420,6789,7041,7052,8829,9314,9353,9620,9645,10253,10395,10630,10653,10818,11019,26585,342184	ACVR1,CEACAM1,CD44,COL4A1,COL5A1,CSF1,DLG3,FAT1,FZD2,TNC,CCN1,ITGA5,ITGB1,KRT16,KRT17,MMP14,MYC,PODXL,STK4,TGFB1I1,TGM2,NRP1,KLF4,SLIT2,CELSR1,MICAL2,SPRY2,DLC1,PDPN,SPINT2,FRS2,LIAS,GREM1,FMN1	34/452
14_Member	GO Biological Processes	GO:0061138	morphogenesis of a branching epithelium	-3.7475	-2.06452	90,1282,1435,4323,4609,6789,7052,8829,9353,9620,10253,10653,10818	ACVR1,COL4A1,CSF1,MMP14,MYC,STK4,TGM2,NRP1,SLIT2,CELSR1,SPRY2,SPINT2,FRS2	13/165
14_Member	GO Biological Processes	GO:0001763	morphogenesis of a branching structure	-3.49701	-1.87022	90,1282,1435,4323,4609,6789,7052,8829,9353,9620,10253,10653,10818	ACVR1,COL4A1,CSF1,MMP14,MYC,STK4,TGM2,NRP1,SLIT2,CELSR1,SPRY2,SPINT2,FRS2	13/175
14_Member	GO Biological Processes	GO:0060562	epithelial tube morphogenesis	-3.23878	-1.6798	90,1282,1435,2535,4323,4609,5420,6789,8829,9353,9620,9645,10253,10395,10653,11019,26585,342184	ACVR1,COL4A1,CSF1,FZD2,MMP14,MYC,PODXL,STK4,NRP1,SLIT2,CELSR1,MICAL2,SPRY2,DLC1,SPINT2,LIAS,GREM1,FMN1	18/312
14_Member	GO Biological Processes	GO:0048754	branching morphogenesis of an epithelial tube	-2.76179	-1.31747	90,1282,1435,4323,4609,6789,8829,9353,9620,10253	ACVR1,COL4A1,CSF1,MMP14,MYC,STK4,NRP1,SLIT2,CELSR1,SPRY2	10/137
14_Member	GO Biological Processes	GO:0035148	tube formation	-2.53732	-1.1516	2535,5420,6789,7052,7534,9620,10395,10653,11019,26585	FZD2,PODXL,STK4,TGM2,YWHAZ,CELSR1,DLC1,SPINT2,LIAS,GREM1	10/147
15_Summary	Reactome Gene Sets	R-HSA-109582	Hemostasis	-10.2454	-7.5201	2,408,409,481,634,857,960,967,1277,1278,1525,1893,2149,2152,2335,3678,3688,3705,4067,4072,5054,5099,5328,5336,5340,5341,5519,5592,6383,6566,6647,6678,7018,7035,7043,7056,7057,7078,7534,10257,10381,10630,30846,50848,51571	A2M,ARRB1,ARRB2,ATP1B1,CEACAM1,CAV1,CD44,CD63,COL1A1,COL1A2,CXADR,ECM1,F2R,F3,FN1,ITGA5,ITGB1,ITPK1,LYN,EPCAM,SERPINE1,PCDH7,PLAU,PLCG2,PLG,PLEK,PPP2R1B,PRKG1,SDC2,SLC16A1,SOD1,SPARC,TF,TFPI,TGFB3,THBD,THBS1,TIMP3,YWHAZ,ABCC4,TUBB3,PDPN,EHD2,F11R,CYRIB	45/-
15_Member	Reactome Gene Sets	R-HSA-109582	Hemostasis	-10.2454	-7.5201	2,408,409,481,634,857,960,967,1277,1278,1525,1893,2149,2152,2335,3678,3688,3705,4067,4072,5054,5099,5328,5336,5340,5341,5519,5592,6383,6566,6647,6678,7018,7035,7043,7056,7057,7078,7534,10257,10381,10630,30846,50848,51571	A2M,ARRB1,ARRB2,ATP1B1,CEACAM1,CAV1,CD44,CD63,COL1A1,COL1A2,CXADR,ECM1,F2R,F3,FN1,ITGA5,ITGB1,ITPK1,LYN,EPCAM,SERPINE1,PCDH7,PLAU,PLCG2,PLG,PLEK,PPP2R1B,PRKG1,SDC2,SLC16A1,SOD1,SPARC,TF,TFPI,TGFB3,THBD,THBS1,TIMP3,YWHAZ,ABCC4,TUBB3,PDPN,EHD2,F11R,CYRIB	45/621
15_Member	Reactome Gene Sets	R-HSA-76002	Platelet activation, signaling and aggregation	-8.23835	-5.75312	2,408,409,967,1277,1278,1893,2149,2335,4067,5054,5099,5336,5340,5341,6647,6678,7018,7043,7057,7078,7534,10257,10630,51571	A2M,ARRB1,ARRB2,CD63,COL1A1,COL1A2,ECM1,F2R,FN1,LYN,SERPINE1,PCDH7,PLCG2,PLG,PLEK,SOD1,SPARC,TF,TGFB3,THBS1,TIMP3,YWHAZ,ABCC4,PDPN,CYRIB	25/263
15_Member	Reactome Gene Sets	R-HSA-114608	Platelet degranulation	-7.0763	-4.78844	2,967,1893,2335,5054,5099,5340,5341,6647,6678,7018,7043,7057,7078,10257,51571	A2M,CD63,ECM1,FN1,SERPINE1,PCDH7,PLG,PLEK,SOD1,SPARC,TF,TGFB3,THBS1,TIMP3,ABCC4,CYRIB	16/129
15_Member	Reactome Gene Sets	R-HSA-76005	Response to elevated platelet cytosolic Ca2+	-6.84369	-4.58855	2,967,1893,2335,5054,5099,5340,5341,6647,6678,7018,7043,7057,7078,10257,51571	A2M,CD63,ECM1,FN1,SERPINE1,PCDH7,PLG,PLEK,SOD1,SPARC,TF,TGFB3,THBS1,TIMP3,ABCC4,CYRIB	16/134
16_Summary	GO Biological Processes	GO:0008285	negative regulation of cell population proliferation	-9.79024	-7.08513	104,634,857,858,1264,1525,1601,1741,2149,2810,3162,3300,3490,4067,4609,5340,5592,5621,5743,5764,5795,5797,6586,6595,6657,6678,6789,7026,7041,7043,7057,7168,7428,8611,9289,9294,9314,9536,9821,10253,10395,10397,10437,10457,10630,10653,10668,26585,30008,55679,80762	ADARB1,CEACAM1,CAV1,CAV2,CNN1,CXADR,DAB2,DLG3,F2R,SFN,HMOX1,DNAJB2,IGFBP7,LYN,MYC,PLG,PRKG1,PRNP,PTGS2,PTN,PTPRJ,PTPRM,SLIT3,SMARCA2,SOX2,SPARC,STK4,NR2F2,TGFB1I1,TGFB3,THBS1,TPM1,VHL,PLPP1,ADGRG1,S1PR2,KLF4,PTGES,RB1CC1,SPRY2,DLC1,NDRG1,IFI30,GPNMB,PDPN,SPINT2,CGRRF1,GREM1,EFEMP2,LIMS2,NDFIP1	51/-
16_Member	GO Biological Processes	GO:0008285	negative regulation of cell population proliferation	-9.79024	-7.08513	104,634,857,858,1264,1525,1601,1741,2149,2810,3162,3300,3490,4067,4609,5340,5592,5621,5743,5764,5795,5797,6586,6595,6657,6678,6789,7026,7041,7043,7057,7168,7428,8611,9289,9294,9314,9536,9821,10253,10395,10397,10437,10457,10630,10653,10668,26585,30008,55679,80762	ADARB1,CEACAM1,CAV1,CAV2,CNN1,CXADR,DAB2,DLG3,F2R,SFN,HMOX1,DNAJB2,IGFBP7,LYN,MYC,PLG,PRKG1,PRNP,PTGS2,PTN,PTPRJ,PTPRM,SLIT3,SMARCA2,SOX2,SPARC,STK4,NR2F2,TGFB1I1,TGFB3,THBS1,TPM1,VHL,PLPP1,ADGRG1,S1PR2,KLF4,PTGES,RB1CC1,SPRY2,DLC1,NDRG1,IFI30,GPNMB,PDPN,SPINT2,CGRRF1,GREM1,EFEMP2,LIMS2,NDFIP1	51/787
17_Summary	GO Biological Processes	GO:0007167	enzyme-linked receptor protein signaling pathway	-9.56551	-6.87971	90,409,558,858,1277,1278,1282,1287,1435,1464,1490,2049,2068,2202,2260,3055,3572,3667,3694,4015,4053,4067,5045,5764,5795,6776,7018,7041,7043,7763,7791,8829,9770,10253,10458,10580,10818,23433,23768,25791,51232,59338,91612,644815	ACVR1,ARRB2,AXL,CAV2,COL1A1,COL1A2,COL4A1,COL4A5,CSF1,CSPG4,CCN2,EPHB3,ERCC2,EFEMP1,FGFR1,HCK,IL6ST,IRS1,ITGB6,LOX,LTBP2,LYN,FURIN,PTN,PTPRJ,STAT5A,TF,TGFB1I1,TGFB3,ZFAND5,ZYX,NRP1,RASSF2,SPRY2,BAIAP2,SORBS1,FRS2,RHOQ,FLRT2,NGEF,CRIM1,PLEKHA1,CHURC1,FAM83G	44/-
17_Member	GO Biological Processes	GO:0007167	enzyme-linked receptor protein signaling pathway	-9.56551	-6.87971	90,409,558,858,1277,1278,1282,1287,1435,1464,1490,2049,2068,2202,2260,3055,3572,3667,3694,4015,4053,4067,5045,5764,5795,6776,7018,7041,7043,7763,7791,8829,9770,10253,10458,10580,10818,23433,23768,25791,51232,59338,91612,644815	ACVR1,ARRB2,AXL,CAV2,COL1A1,COL1A2,COL4A1,COL4A5,CSF1,CSPG4,CCN2,EPHB3,ERCC2,EFEMP1,FGFR1,HCK,IL6ST,IRS1,ITGB6,LOX,LTBP2,LYN,FURIN,PTN,PTPRJ,STAT5A,TF,TGFB1I1,TGFB3,ZFAND5,ZYX,NRP1,RASSF2,SPRY2,BAIAP2,SORBS1,FRS2,RHOQ,FLRT2,NGEF,CRIM1,PLEKHA1,CHURC1,FAM83G	44/628
17_Member	GO Biological Processes	GO:0007169	transmembrane receptor protein tyrosine kinase signaling pathway	-7.47196	-5.11904	558,858,1277,1282,1287,1435,1464,1490,2049,2068,2202,2260,3055,3667,4015,4067,5795,6776,7763,8829,9770,10253,10458,10580,10818,23433,23768,25791,51232,59338,91612	AXL,CAV2,COL1A1,COL4A1,COL4A5,CSF1,CSPG4,CCN2,EPHB3,ERCC2,EFEMP1,FGFR1,HCK,IRS1,LOX,LYN,PTPRJ,STAT5A,ZFAND5,NRP1,RASSF2,SPRY2,BAIAP2,SORBS1,FRS2,RHOQ,FLRT2,NGEF,CRIM1,PLEKHA1,CHURC1	31/418
18_Summary	GO Biological Processes	GO:0098609	cell-cell adhesion	-9.54387	-6.87655	90,634,960,999,1266,1465,1525,1832,2195,2239,2650,3491,3678,3688,4026,4072,5098,5099,5317,5341,5797,5819,7070,7412,8613,9620,10298,10398,10458,10630,22801,23022,25945,26011,50848,54751,55679,57526,57863,91624,3691,3861,84552,2260,4008,5795,10580,103910,958,4684,6383	ACVR1,CEACAM1,CD44,CDH1,CNN3,CSRP1,CXADR,DSP,FAT1,GPC4,GCNT1,CCN1,ITGA5,ITGB1,LPP,EPCAM,PCDHGC3,PCDH7,PKP1,PLEK,PTPRM,NECTIN2,THY1,VCAM1,PLPP3,CELSR1,PAK4,MYL9,BAIAP2,PDPN,ITGA11,PALLD,NECTIN3,TENM4,F11R,FBLIM1,LIMS2,PCDH19,CADM3,NEXN,ITGB4,KRT14,PARD6G,FGFR1,LMO7,PTPRJ,SORBS1,MYL12B,CD40,NCAM1,SDC2	51/-
18_Member	GO Biological Processes	GO:0098609	cell-cell adhesion	-9.54387	-6.87655	90,634,960,999,1266,1465,1525,1832,2195,2239,2650,3491,3678,3688,4026,4072,5098,5099,5317,5341,5797,5819,7070,7412,8613,9620,10298,10398,10458,10630,22801,23022,25945,26011,50848,54751,55679,57526,57863,91624	ACVR1,CEACAM1,CD44,CDH1,CNN3,CSRP1,CXADR,DSP,FAT1,GPC4,GCNT1,CCN1,ITGA5,ITGB1,LPP,EPCAM,PCDHGC3,PCDH7,PKP1,PLEK,PTPRM,NECTIN2,THY1,VCAM1,PLPP3,CELSR1,PAK4,MYL9,BAIAP2,PDPN,ITGA11,PALLD,NECTIN3,TENM4,F11R,FBLIM1,LIMS2,PCDH19,CADM3,NEXN	40/536
18_Member	GO Biological Processes	GO:0098742	cell-cell adhesion via plasma-membrane adhesion molecules	-5.25626	-3.28428	90,634,999,1525,2195,2239,3678,3688,5098,5099,5797,5819,7412,9620,23022,25945,26011,57526,57863,91624	ACVR1,CEACAM1,CDH1,CXADR,FAT1,GPC4,ITGA5,ITGB1,PCDHGC3,PCDH7,PTPRM,NECTIN2,VCAM1,CELSR1,PALLD,NECTIN3,TENM4,PCDH19,CADM3,NEXN	20/261
18_Member	Reactome Gene Sets	R-HSA-446728	Cell junction organization	-4.94794	-3.02589	999,3688,3691,3861,5819,25945,50848,54751,55679,57863,84552	CDH1,ITGB1,ITGB4,KRT14,NECTIN2,NECTIN3,F11R,FBLIM1,LIMS2,CADM3,PARD6G	11/91
18_Member	KEGG Pathway	hsa04520	Adherens junction	-4.8567	-2.95685	999,2260,4008,5795,5797,5819,10398,10458,10580,25945,103910	CDH1,FGFR1,LMO7,PTPRJ,PTPRM,NECTIN2,MYL9,BAIAP2,SORBS1,NECTIN3,MYL12B	11/93
18_Member	GO Biological Processes	GO:0007156	homophilic cell adhesion via plasma membrane adhesion molecules	-4.2816	-2.49652	634,999,2195,3688,5098,5099,5797,5819,9620,23022,25945,57526,57863,91624	CEACAM1,CDH1,FAT1,ITGB1,PCDHGC3,PCDH7,PTPRM,NECTIN2,CELSR1,PALLD,NECTIN3,PCDH19,CADM3,NEXN	14/167
18_Member	Reactome Gene Sets	R-HSA-1500931	Cell-Cell communication	-3.5529	-1.9153	999,3688,3691,3861,5819,25945,50848,54751,55679,57863,84552	CDH1,ITGB1,ITGB4,KRT14,NECTIN2,NECTIN3,F11R,FBLIM1,LIMS2,CADM3,PARD6G	11/129
18_Member	Reactome Gene Sets	R-HSA-420597	Nectin/Necl trans heterodimerization	-3.35344	-1.76606	5819,25945,57863	NECTIN2,NECTIN3,CADM3	3/7
18_Member	Canonical Pathways	M72	PID NECTIN PATHWAY	-3.17504	-1.62789	999,5797,5819,25945,50848	CDH1,PTPRM,NECTIN2,NECTIN3,F11R	5/30
18_Member	KEGG Pathway	hsa04514	Cell adhesion molecules	-2.83949	-1.37911	958,999,3688,4684,5797,5819,6383,7412,25945,50848,57863	CD40,CDH1,ITGB1,NCAM1,PTPRM,NECTIN2,SDC2,VCAM1,NECTIN3,F11R,CADM3	11/157
18_Member	Reactome Gene Sets	R-HSA-421270	Cell-cell junction organization	-2.37363	-1.03686	999,5819,25945,50848,57863,84552	CDH1,NECTIN2,NECTIN3,F11R,CADM3,PARD6G	6/64
18_Member	Reactome Gene Sets	R-HSA-418990	Adherens junctions interactions	-2.11669	-0.845497	999,5819,25945,57863	CDH1,NECTIN2,NECTIN3,CADM3	4/33
19_Summary	GO Biological Processes	GO:0032970	regulation of actin filament-based process	-9.40105	-6.77677	857,1265,1490,1832,3055,5341,7043,7168,8829,9353,9620,10391,10395,10458,10630,10677,10788,11344,11346,23433,25802,29108,50848,51474,51571,54961,57482,64857,81553,85415,90102,116985,342184,402,11075,11117,30008,672,57132,85360,91624,1307,2049,5336,5795,7013,7058,7070,10211,23768,26499,29904,51673,999,1382,2149,2335,5592,5743,6647,6696,9821,10509,57698,120892,409,598,5810,8260,10040,2670,7186,54751…	CAV1,CNN2,CCN2,DSP,HCK,PLEK,TGFB3,TPM1,NRP1,SLIT2,CELSR1,CORO2B,DLC1,BAIAP2,PDPN,AVIL,IQGAP2,TWF2,SYNPO,RHOQ,LMOD1,PYCARD,F11R,LIMA1,CYRIB,SSH3,CRACD,PLEKHG2,CYRIA,RHPN2,PHLDB2,ARAP1,FMN1,ARL2,STMN2,EMILIN1,EFEMP2,BRCA1,CHMP1B,SYDE1,NEXN,COL16A1,EPHB3,PLCG2,PTPRJ,TERF1,THBS2,THY1,FLOT1,FLRT2,PLEK2,EEF2K,TPPP3,CDH1,CRABP2,F2R,FN1,PRKG1,PTGS2,SOD1,SPP1,RB1CC1,SEMA4B,SHTN1,LRRK2,ARRB2,BCL2L1,RAD1,NA…	76/-
19_Member	GO Biological Processes	GO:0032970	regulation of actin filament-based process	-9.40105	-6.77677	857,1265,1490,1832,3055,5341,7043,7168,8829,9353,9620,10391,10395,10458,10630,10677,10788,11344,11346,23433,25802,29108,50848,51474,51571,54961,57482,64857,81553,85415,90102,116985,342184	CAV1,CNN2,CCN2,DSP,HCK,PLEK,TGFB3,TPM1,NRP1,SLIT2,CELSR1,CORO2B,DLC1,BAIAP2,PDPN,AVIL,IQGAP2,TWF2,SYNPO,RHOQ,LMOD1,PYCARD,F11R,LIMA1,CYRIB,SSH3,CRACD,PLEKHG2,CYRIA,RHPN2,PHLDB2,ARAP1,FMN1	33/388
19_Member	GO Biological Processes	GO:0110053	regulation of actin filament organization	-8.52591	-5.99027	1490,3055,5341,7043,7168,8829,9353,10391,10395,10458,10677,11344,11346,25802,29108,50848,51474,51571,54961,57482,64857,81553,85415,90102,116985,342184	CCN2,HCK,PLEK,TGFB3,TPM1,NRP1,SLIT2,CORO2B,DLC1,BAIAP2,AVIL,TWF2,SYNPO,LMOD1,PYCARD,F11R,LIMA1,CYRIB,SSH3,CRACD,PLEKHG2,CYRIA,RHPN2,PHLDB2,ARAP1,FMN1	26/274
19_Member	GO Biological Processes	GO:0032956	regulation of actin cytoskeleton organization	-8.16641	-5.69867	1490,3055,5341,7043,7168,8829,9353,9620,10391,10395,10458,10677,10788,11344,11346,23433,25802,29108,50848,51474,51571,54961,57482,64857,81553,85415,90102,116985,342184	CCN2,HCK,PLEK,TGFB3,TPM1,NRP1,SLIT2,CELSR1,CORO2B,DLC1,BAIAP2,AVIL,IQGAP2,TWF2,SYNPO,RHOQ,LMOD1,PYCARD,F11R,LIMA1,CYRIB,SSH3,CRACD,PLEKHG2,CYRIA,RHPN2,PHLDB2,ARAP1,FMN1	29/347
19_Member	GO Biological Processes	GO:1902903	regulation of supramolecular fiber organization	-7.80688	-5.39282	402,1490,3055,5341,7043,7168,8829,9353,10391,10395,10458,10677,11075,11117,11344,11346,25802,29108,30008,50848,51474,51571,54961,57482,64857,81553,85415,90102,116985,342184	ARL2,CCN2,HCK,PLEK,TGFB3,TPM1,NRP1,SLIT2,CORO2B,DLC1,BAIAP2,AVIL,STMN2,EMILIN1,TWF2,SYNPO,LMOD1,PYCARD,EFEMP2,F11R,LIMA1,CYRIB,SSH3,CRACD,PLEKHG2,CYRIA,RHPN2,PHLDB2,ARAP1,FMN1	30/382
19_Member	GO Biological Processes	GO:0051493	regulation of cytoskeleton organization	-7.3182	-4.99902	402,672,1490,3055,5341,7043,7168,8829,9353,9620,10391,10395,10458,10677,10788,11075,11344,11346,23433,25802,29108,50848,51474,51571,54961,57132,57482,64857,81553,85360,85415,90102,91624,116985,342184	ARL2,BRCA1,CCN2,HCK,PLEK,TGFB3,TPM1,NRP1,SLIT2,CELSR1,CORO2B,DLC1,BAIAP2,AVIL,IQGAP2,STMN2,TWF2,SYNPO,RHOQ,LMOD1,PYCARD,F11R,LIMA1,CYRIB,SSH3,CHMP1B,CRACD,PLEKHG2,CYRIA,SYDE1,RHPN2,PHLDB2,NEXN,ARAP1,FMN1	35/519
19_Member	GO Biological Processes	GO:0044089	positive regulation of cellular component biogenesis	-6.12852	-4.00268	402,857,1307,1490,2049,3055,5336,5341,5795,7013,7043,7058,7070,7168,8829,10211,10458,10677,11117,11344,11346,23433,23768,25802,26499,29108,29904,51673,57482,90102,116985,342184	ARL2,CAV1,COL16A1,CCN2,EPHB3,HCK,PLCG2,PLEK,PTPRJ,TERF1,TGFB3,THBS2,THY1,TPM1,NRP1,FLOT1,BAIAP2,AVIL,EMILIN1,TWF2,SYNPO,RHOQ,FLRT2,LMOD1,PLEK2,PYCARD,EEF2K,TPPP3,CRACD,PHLDB2,ARAP1,FMN1	32/506
19_Member	GO Biological Processes	GO:0008064	regulation of actin polymerization or depolymerization	-5.2933	-3.31023	3055,5341,9353,10458,10677,11344,25802,29108,51474,51571,54961,57482,64857,81553,342184	HCK,PLEK,SLIT2,BAIAP2,AVIL,TWF2,LMOD1,PYCARD,LIMA1,CYRIB,SSH3,CRACD,PLEKHG2,CYRIA,FMN1	15/155
19_Member	GO Biological Processes	GO:0030832	regulation of actin filament length	-5.19108	-3.22454	3055,5341,9353,10458,10677,11344,25802,29108,51474,51571,54961,57482,64857,81553,342184	HCK,PLEK,SLIT2,BAIAP2,AVIL,TWF2,LMOD1,PYCARD,LIMA1,CYRIB,SSH3,CRACD,PLEKHG2,CYRIA,FMN1	15/158
19_Member	GO Biological Processes	GO:0051494	negative regulation of cytoskeleton organization	-5.15758	-3.19819	672,9353,10391,10395,10677,11075,11344,25802,50848,51474,51571,54961,85415,90102,116985	BRCA1,SLIT2,CORO2B,DLC1,AVIL,STMN2,TWF2,LMOD1,F11R,LIMA1,CYRIB,SSH3,RHPN2,PHLDB2,ARAP1	15/159
19_Member	GO Biological Processes	GO:1902904	negative regulation of supramolecular fiber organization	-5.02637	-3.09111	9353,10391,10395,10677,11075,11117,11344,25802,50848,51474,51571,54961,85415,90102,116985	SLIT2,CORO2B,DLC1,AVIL,STMN2,EMILIN1,TWF2,LMOD1,F11R,LIMA1,CYRIB,SSH3,RHPN2,PHLDB2,ARAP1	15/163
19_Member	GO Biological Processes	GO:0090066	regulation of anatomical structure size	-4.89261	-2.98181	857,999,1382,2149,2335,3055,5341,5592,5743,6647,6696,8829,9353,9821,10458,10509,10677,11344,25802,29108,51474,51571,54961,57482,57698,64857,81553,120892,342184	CAV1,CDH1,CRABP2,F2R,FN1,HCK,PLEK,PRKG1,PTGS2,SOD1,SPP1,NRP1,SLIT2,RB1CC1,BAIAP2,SEMA4B,AVIL,TWF2,LMOD1,PYCARD,LIMA1,CYRIB,SSH3,CRACD,SHTN1,PLEKHG2,CYRIA,LRRK2,FMN1	29/500
19_Member	GO Biological Processes	GO:1902905	positive regulation of supramolecular fiber organization	-4.65759	-2.79617	402,1490,3055,5341,7043,7168,8829,10458,11075,11346,25802,29108,30008,57482,342184	ARL2,CCN2,HCK,PLEK,TGFB3,TPM1,NRP1,BAIAP2,STMN2,SYNPO,LMOD1,PYCARD,EFEMP2,CRACD,FMN1	15/175
19_Member	GO Biological Processes	GO:0032535	regulation of cellular component size	-4.64927	-2.79204	999,1382,2335,3055,5341,6696,8829,9353,9821,10458,10509,10677,11344,25802,29108,51474,51571,54961,57482,57698,64857,81553,342184	CDH1,CRABP2,FN1,HCK,PLEK,SPP1,NRP1,SLIT2,RB1CC1,BAIAP2,SEMA4B,AVIL,TWF2,LMOD1,PYCARD,LIMA1,CYRIB,SSH3,CRACD,SHTN1,PLEKHG2,CYRIA,FMN1	23/360
19_Member	GO Biological Processes	GO:0032271	regulation of protein polymerization	-4.63603	-2.78104	402,3055,9353,10458,10677,11075,11344,25802,29108,51571,51673,54961,57482,64857,81553,342184	ARL2,HCK,SLIT2,BAIAP2,AVIL,STMN2,TWF2,LMOD1,PYCARD,CYRIB,TPPP3,SSH3,CRACD,PLEKHG2,CYRIA,FMN1	16/197
19_Member	GO Biological Processes	GO:0030833	regulation of actin filament polymerization	-4.61164	-2.76001	3055,9353,10458,10677,11344,25802,29108,51571,54961,57482,64857,81553,342184	HCK,SLIT2,BAIAP2,AVIL,TWF2,LMOD1,PYCARD,CYRIB,SSH3,CRACD,PLEKHG2,CYRIA,FMN1	13/136
19_Member	GO Biological Processes	GO:0010639	negative regulation of organelle organization	-4.53802	-2.70134	409,598,672,5810,7013,8260,9353,10040,10391,10395,10677,11075,11344,25802,50848,51474,51571,54961,85415,90102,116985,120892	ARRB2,BCL2L1,BRCA1,RAD1,TERF1,NAA10,SLIT2,TOM1L1,CORO2B,DLC1,AVIL,STMN2,TWF2,LMOD1,F11R,LIMA1,CYRIB,SSH3,RHPN2,PHLDB2,ARAP1,LRRK2	22/341
19_Member	GO Biological Processes	GO:0043254	regulation of protein-containing complex assembly	-4.13533	-2.38006	402,2670,3055,5336,5341,7013,7186,9353,10458,10677,11075,11344,25802,29108,51571,51673,54751,54961,57482,64857,81553,147138,342184,345611	ARL2,GFAP,HCK,PLCG2,PLEK,TERF1,TRAF2,SLIT2,BAIAP2,AVIL,STMN2,TWF2,LMOD1,PYCARD,CYRIB,TPPP3,FBLIM1,SSH3,CRACD,PLEKHG2,CYRIA,TMC8,FMN1,IRGM	24/415
19_Member	GO Biological Processes	GO:0051495	positive regulation of cytoskeleton organization	-3.75643	-2.07252	402,1490,3055,5341,7043,7168,8829,10458,11075,11346,25802,29108,57482,342184	ARL2,CCN2,HCK,PLEK,TGFB3,TPM1,NRP1,BAIAP2,STMN2,SYNPO,LMOD1,PYCARD,CRACD,FMN1	14/187
19_Member	GO Biological Processes	GO:0030834	regulation of actin filament depolymerization	-2.79184	-1.34063	5341,10677,11344,25802,51474,57482	PLEK,AVIL,TWF2,LMOD1,LIMA1,CRACD	6/53
19_Member	GO Biological Processes	GO:0030838	positive regulation of actin filament polymerization	-2.79184	-1.34063	3055,10458,25802,29108,57482,342184	HCK,BAIAP2,LMOD1,PYCARD,CRACD,FMN1	6/53
19_Member	GO Biological Processes	GO:0032273	positive regulation of protein polymerization	-2.78594	-1.33665	402,3055,10458,25802,29108,51673,57482,342184	ARL2,HCK,BAIAP2,LMOD1,PYCARD,TPPP3,CRACD,FMN1	8/92
19_Member	GO Biological Processes	GO:0032272	negative regulation of protein polymerization	-2.64333	-1.228	9353,10677,11075,11344,25802,51571,54961	SLIT2,AVIL,STMN2,TWF2,LMOD1,CYRIB,SSH3	7/76
19_Member	GO Biological Processes	GO:0030837	negative regulation of actin filament polymerization	-2.47798	-1.1117	9353,10677,11344,25802,51571,54961	SLIT2,AVIL,TWF2,LMOD1,CYRIB,SSH3	6/61
19_Member	GO Biological Processes	GO:1901879	regulation of protein depolymerization	-2.3413	-1.01164	5341,10677,11075,11344,25802,51474,57482	PLEK,AVIL,STMN2,TWF2,LMOD1,LIMA1,CRACD	7/86
19_Member	GO Biological Processes	GO:0031334	positive regulation of protein-containing complex assembly	-2.07567	-0.814278	402,3055,5336,5341,7013,10458,25802,29108,51673,57482,342184	ARL2,HCK,PLCG2,PLEK,TERF1,BAIAP2,LMOD1,PYCARD,TPPP3,CRACD,FMN1	11/198
19_Member	GO Biological Processes	GO:0031333	negative regulation of protein-containing complex assembly	-2.0443	-0.794735	9353,10677,11075,11344,25802,51571,54961,147138,345611	SLIT2,AVIL,STMN2,TWF2,LMOD1,CYRIB,SSH3,TMC8,IRGM	9/147
19_Member	GO Biological Processes	GO:1902743	regulation of lamellipodium organization	-2.03259	-0.786461	960,9353,10630,10677,11344	CD44,SLIT2,PDPN,AVIL,TWF2	5/54
19_Member	GO Biological Processes	GO:0043244	regulation of protein-containing complex disassembly	-2.01966	-0.777288	5341,10677,11075,11344,25802,51474,57482,345611	PLEK,AVIL,STMN2,TWF2,LMOD1,LIMA1,CRACD,IRGM	8/123
19_Member	GO Biological Processes	GO:1901881	positive regulation of protein depolymerization	-2.004	-0.768712	5341,11075,57482	PLEK,STMN2,CRACD	3/19
20_Summary	GO Biological Processes	GO:0007005	mitochondrion organization	-8.86806	-6.29036	598,665,858,1525,1678,2810,4082,4538,4540,4696,4710,4713,4725,5819,9821,23277,23761,25793,29090,51566,54968,55102,55187,56652,79017,80179,84273,84303,84883,120892,130916,134266,154791,401505,440574,79751,253512	BCL2L1,BNIP3L,CAV2,CXADR,TIMM8A,SFN,MARCKS,ND4,ND5,NDUFA3,NDUFB4,NDUFB7,NDUFS5,NECTIN2,RB1CC1,CLUH,PISD,FBXO7,TIMM21,ARMCX3,TMEM70,ATG2B,VPS13D,TWNK,GGCT,MYO19,NOA1,CHCHD6,AIFM2,LRRK2,MTERF4,GRPEL2,FMC1,TOMM5,MICOS10,SLC25A22,SLC25A30	37/-
20_Member	GO Biological Processes	GO:0007005	mitochondrion organization	-8.86806	-6.29036	598,665,858,1525,1678,2810,4082,4538,4540,4696,4710,4713,4725,5819,9821,23277,23761,25793,29090,51566,54968,55102,55187,56652,79017,80179,84273,84303,84883,120892,130916,134266,154791,401505,440574	BCL2L1,BNIP3L,CAV2,CXADR,TIMM8A,SFN,MARCKS,ND4,ND5,NDUFA3,NDUFB4,NDUFB7,NDUFS5,NECTIN2,RB1CC1,CLUH,PISD,FBXO7,TIMM21,ARMCX3,TMEM70,ATG2B,VPS13D,TWNK,GGCT,MYO19,NOA1,CHCHD6,AIFM2,LRRK2,MTERF4,GRPEL2,FMC1,TOMM5,MICOS10	35/451
20_Member	GO Biological Processes	GO:0006626	protein targeting to mitochondrion	-2.44247	-1.08292	1678,25793,29090,130916,134266,401505	TIMM8A,FBXO7,TIMM21,MTERF4,GRPEL2,TOMM5	6/62
20_Member	GO Biological Processes	GO:0070585	protein localization to mitochondrion	-2.3413	-1.01164	1678,25793,29090,120892,130916,134266,401505	TIMM8A,FBXO7,TIMM21,LRRK2,MTERF4,GRPEL2,TOMM5	7/86
20_Member	GO Biological Processes	GO:0006839	mitochondrial transport	-2.23953	-0.935899	598,665,1678,25793,29090,79751,130916,134266,253512,401505	BCL2L1,BNIP3L,TIMM8A,FBXO7,TIMM21,SLC25A22,MTERF4,GRPEL2,SLC25A30,TOMM5	10/162
20_Member	GO Biological Processes	GO:0072655	establishment of protein localization to mitochondrion	-2.0127	-0.772369	1678,25793,29090,130916,134266,401505	TIMM8A,FBXO7,TIMM21,MTERF4,GRPEL2,TOMM5	6/76

## Sheet: WT_D3_D0_UP
GroupID	Category	Term	Description	LogP	Log(q-value)	Genes	Symbols	InTerm_InList
1_Summary	GO Biological Processes	GO:0006399	tRNA metabolic process	-14.9449	-10.663	4141,6894,10557,10799,23587,27037,51095,54888,55140,55152,57176,64172,79693,80222,80746,84705,91801,92675,92935,112970,113179,123283,134637,142940,2068,3692,10360,10438,27079,29081,54853,55781,79664,79863,85395,130916,196074,104,6628,55783,83640,164668,1788,2593,4548,4552,4800,7172,10322,28989,56980,57673,79918,84274,118881,138199,221656	MARS1,TARBP1,RPP38,RPP40,ELP5,TRMT2A,TRNT1,NSUN2,ELP3,DALRD3,VARS2,OSGEPL1,YRDC,TARS2,TSEN2,GTPBP3,ALKBH8,DTD1,MARS2,KTI12,ADAT3,TARS3,ADAT2,TRUB1,ERCC2,EIF6,NPM3,C1D,RPUSD2,METTL5,WDR55,RIOK2,ICE2,RBFA,SLX9,MTERF4,METTL15,ADARB1,SNRPB,CMTR2,RAMAC,APOBEC3H,DNMT3A,GAMT,MTR,MTRR,NFYA,TPMT,SMYD5,NTMT1,PRDM10,BEND3,SETD6,COQ5,COMTD1,CARNMT1,KDM1B	57/-
1_Member	GO Biological Processes	GO:0006399	tRNA metabolic process	-14.9449	-10.663	4141,6894,10557,10799,23587,27037,51095,54888,55140,55152,57176,64172,79693,80222,80746,84705,91801,92675,92935,112970,113179,123283,134637,142940	MARS1,TARBP1,RPP38,RPP40,ELP5,TRMT2A,TRNT1,NSUN2,ELP3,DALRD3,VARS2,OSGEPL1,YRDC,TARS2,TSEN2,GTPBP3,ALKBH8,DTD1,MARS2,KTI12,ADAT3,TARS3,ADAT2,TRUB1	24/194
1_Member	GO Biological Processes	GO:0034660	ncRNA metabolic process	-14.7105	-10.663	2068,3692,4141,6894,10360,10438,10557,10799,23587,27037,27079,29081,51095,54853,54888,55140,55152,55781,57176,64172,79664,79693,79863,80222,80746,84705,85395,91801,92675,92935,112970,113179,123283,130916,134637,142940,196074	ERCC2,EIF6,MARS1,TARBP1,NPM3,C1D,RPP38,RPP40,ELP5,TRMT2A,RPUSD2,METTL5,TRNT1,WDR55,NSUN2,ELP3,DALRD3,RIOK2,VARS2,OSGEPL1,ICE2,YRDC,RBFA,TARS2,TSEN2,GTPBP3,SLX9,ALKBH8,DTD1,MARS2,KTI12,ADAT3,TARS3,MTERF4,ADAT2,TRUB1,METTL15	37/520
1_Member	GO Biological Processes	GO:0009451	RNA modification	-12.6886	-8.81718	104,6628,6894,23587,27037,27079,29081,54888,55140,55152,55783,64172,79693,83640,84705,91801,112970,134637,142940,164668,196074	ADARB1,SNRPB,TARBP1,ELP5,TRMT2A,RPUSD2,METTL5,NSUN2,ELP3,DALRD3,CMTR2,OSGEPL1,YRDC,RAMAC,GTPBP3,ALKBH8,KTI12,ADAT2,TRUB1,APOBEC3H,METTL15	21/179
1_Member	GO Biological Processes	GO:0032259	methylation	-12.4252	-8.67869	1788,2593,4548,4552,4800,6628,6894,7172,10322,27037,28989,29081,54888,55152,55783,56980,57673,79918,83640,84274,84705,91801,118881,138199,196074,221656	DNMT3A,GAMT,MTR,MTRR,NFYA,SNRPB,TARBP1,TPMT,SMYD5,TRMT2A,NTMT1,METTL5,NSUN2,DALRD3,CMTR2,PRDM10,BEND3,SETD6,RAMAC,COQ5,GTPBP3,ALKBH8,COMTD1,CARNMT1,METTL15,KDM1B	26/300
1_Member	GO Biological Processes	GO:0034470	ncRNA processing	-12.1371	-8.4875	2068,3692,6894,10360,10438,10557,10799,23587,27037,27079,29081,51095,54853,54888,55140,55152,55781,64172,79693,79863,80746,84705,85395,91801,112970,113179,130916,134637,142940,196074	ERCC2,EIF6,TARBP1,NPM3,C1D,RPP38,RPP40,ELP5,TRMT2A,RPUSD2,METTL5,TRNT1,WDR55,NSUN2,ELP3,DALRD3,RIOK2,OSGEPL1,YRDC,RBFA,TSEN2,GTPBP3,SLX9,ALKBH8,KTI12,ADAT3,MTERF4,ADAT2,TRUB1,METTL15	30/417
1_Member	GO Biological Processes	GO:0008033	tRNA processing	-11.9779	-8.4075	6894,10557,10799,23587,27037,51095,54888,55140,55152,64172,79693,80746,84705,91801,112970,113179,134637,142940	TARBP1,RPP38,RPP40,ELP5,TRMT2A,TRNT1,NSUN2,ELP3,DALRD3,OSGEPL1,YRDC,TSEN2,GTPBP3,ALKBH8,KTI12,ADAT3,ADAT2,TRUB1	18/134
1_Member	GO Biological Processes	GO:0006400	tRNA modification	-8.98072	-5.58641	6894,23587,27037,54888,55140,55152,64172,79693,84705,91801,112970,134637,142940	TARBP1,ELP5,TRMT2A,NSUN2,ELP3,DALRD3,OSGEPL1,YRDC,GTPBP3,ALKBH8,KTI12,ADAT2,TRUB1	13/94
1_Member	GO Biological Processes	GO:0043414	macromolecule methylation	-8.37399	-5.02543	1788,4552,4800,6628,6894,10322,27037,28989,29081,54888,55152,55783,57673,79918,83640,84705,91801,196074,221656	DNMT3A,MTRR,NFYA,SNRPB,TARBP1,SMYD5,TRMT2A,NTMT1,METTL5,NSUN2,DALRD3,CMTR2,BEND3,SETD6,RAMAC,GTPBP3,ALKBH8,METTL15,KDM1B	19/247
1_Member	GO Biological Processes	GO:0001510	RNA methylation	-7.02177	-3.95197	6628,6894,27037,29081,54888,55152,55783,83640,84705,91801,196074	SNRPB,TARBP1,TRMT2A,METTL5,NSUN2,DALRD3,CMTR2,RAMAC,GTPBP3,ALKBH8,METTL15	11/92
1_Member	GO Biological Processes	GO:0030488	tRNA methylation	-4.52728	-2.02382	6894,27037,54888,55152,84705,91801	TARBP1,TRMT2A,NSUN2,DALRD3,GTPBP3,ALKBH8	6/42
2_Summary	GO Biological Processes	GO:0043603	amide metabolic process	-10.9277	-7.42423	290,1368,1725,1964,2356,2583,2760,3692,4141,4552,4860,5046,5625,6134,6150,6470,7064,8705,8892,10166,10654,27090,29904,55052,55152,57176,60558,80222,84285,84545,92170,92399,92935,123283,126410,138199,200916,219402,283927,641371,26284,51095,56652,130916	ANPEP,CPM,DHPS,EIF1AX,FPGS,B4GALNT1,GM2A,EIF6,MARS1,MTRR,PNP,PCSK6,PRODH,RPL10,MRPL23,SHMT1,THOP1,B3GALT4,EIF2B2,SLC25A15,PMVK,ST6GALNAC4,EEF2K,MRPL20,DALRD3,VARS2,GUF1,TARS2,EIF1AD,MRPL43,MTG1,MRRF,MARS2,TARS3,CYP4F22,CARNMT1,RPL22L1,MTIF3,NUDT7,ACOT1,ERAL1,TRNT1,TWNK,MTERF4	44/-
2_Member	GO Biological Processes	GO:0043603	amide metabolic process	-10.9277	-7.42423	290,1368,1725,1964,2356,2583,2760,3692,4141,4552,4860,5046,5625,6134,6150,6470,7064,8705,8892,10166,10654,27090,29904,55052,55152,57176,60558,80222,84285,84545,92170,92399,92935,123283,126410,138199,200916,219402,283927,641371	ANPEP,CPM,DHPS,EIF1AX,FPGS,B4GALNT1,GM2A,EIF6,MARS1,MTRR,PNP,PCSK6,PRODH,RPL10,MRPL23,SHMT1,THOP1,B3GALT4,EIF2B2,SLC25A15,PMVK,ST6GALNAC4,EEF2K,MRPL20,DALRD3,VARS2,GUF1,TARS2,EIF1AD,MRPL43,MTG1,MRRF,MARS2,TARS3,CYP4F22,CARNMT1,RPL22L1,MTIF3,NUDT7,ACOT1	40/799
2_Member	GO Biological Processes	GO:0006518	peptide metabolic process	-7.38669	-4.18426	290,1368,1725,1964,3692,4141,5046,6134,6150,7064,8892,29904,55052,55152,57176,60558,80222,84285,84545,92170,92399,92935,123283,138199,200916,219402	ANPEP,CPM,DHPS,EIF1AX,EIF6,MARS1,PCSK6,RPL10,MRPL23,THOP1,EIF2B2,EEF2K,MRPL20,DALRD3,VARS2,GUF1,TARS2,EIF1AD,MRPL43,MTG1,MRRF,MARS2,TARS3,CARNMT1,RPL22L1,MTIF3	26/513
2_Member	GO Biological Processes	GO:0043604	amide biosynthetic process	-6.91726	-3.86974	1725,1964,2583,3692,4141,6134,6150,8705,8892,10166,27090,29904,55052,55152,57176,60558,80222,84285,84545,92170,92399,92935,123283,126410,200916,219402	DHPS,EIF1AX,B4GALNT1,EIF6,MARS1,RPL10,MRPL23,B3GALT4,EIF2B2,SLC25A15,ST6GALNAC4,EEF2K,MRPL20,DALRD3,VARS2,GUF1,TARS2,EIF1AD,MRPL43,MTG1,MRRF,MARS2,TARS3,CYP4F22,RPL22L1,MTIF3	26/542
2_Member	GO Biological Processes	GO:0006412	translation	-6.52396	-3.56018	1725,1964,3692,4141,6134,6150,8892,29904,55052,55152,57176,60558,80222,84285,84545,92170,92399,92935,123283,200916,219402	DHPS,EIF1AX,EIF6,MARS1,RPL10,MRPL23,EIF2B2,EEF2K,MRPL20,DALRD3,VARS2,GUF1,TARS2,EIF1AD,MRPL43,MTG1,MRRF,MARS2,TARS3,RPL22L1,MTIF3	21/389
2_Member	GO Biological Processes	GO:0043043	peptide biosynthetic process	-6.01771	-3.14627	1725,1964,3692,4141,6134,6150,8892,29904,55052,55152,57176,60558,80222,84285,84545,92170,92399,92935,123283,200916,219402	DHPS,EIF1AX,EIF6,MARS1,RPL10,MRPL23,EIF2B2,EEF2K,MRPL20,DALRD3,VARS2,GUF1,TARS2,EIF1AD,MRPL43,MTG1,MRRF,MARS2,TARS3,RPL22L1,MTIF3	21/418
2_Member	Reactome Gene Sets	R-HSA-72766	Translation	-3.99355	-1.64931	1964,4141,6134,6150,8892,26284,55052,57176,80222,84545,92399,92935,200916,219402	EIF1AX,MARS1,RPL10,MRPL23,EIF2B2,ERAL1,MRPL20,VARS2,TARS2,MRPL43,MRRF,MARS2,RPL22L1,MTIF3	14/292
2_Member	GO Biological Processes	GO:0140053	mitochondrial gene expression	-3.63351	-1.39554	6150,51095,55052,56652,80222,84545,92170,130916,219402	MRPL23,TRNT1,MRPL20,TWNK,TARS2,MRPL43,MTG1,MTERF4,MTIF3	9/142
2_Member	Reactome Gene Sets	R-HSA-5368287	Mitochondrial translation	-2.63309	-0.792949	6150,26284,55052,84545,92399,219402	MRPL23,ERAL1,MRPL20,MRPL43,MRRF,MTIF3	6/93
2_Member	GO Biological Processes	GO:0032543	mitochondrial translation	-2.2729	-0.557227	6150,55052,80222,84545,92170,219402	MRPL23,MRPL20,TARS2,MRPL43,MTG1,MTIF3	6/110
2_Member	Reactome Gene Sets	R-HSA-5368286	Mitochondrial translation initiation	-2.0636	-0.425163	6150,26284,55052,84545,219402	MRPL23,ERAL1,MRPL20,MRPL43,MTIF3	5/87
2_Member	Reactome Gene Sets	R-HSA-5419276	Mitochondrial translation termination	-2.0636	-0.425163	6150,26284,55052,84545,92399	MRPL23,ERAL1,MRPL20,MRPL43,MRRF	5/87
3_Summary	GO Biological Processes	GO:0006520	amino acid metabolic process	-9.74724	-6.30177	95,586,1428,1491,2184,2356,4141,4548,4552,5471,5625,5723,6470,23464,55152,57176,80222,84706,84842,92935,123283,138199,2593,2628,6134,7263,10166,11019,200916,4860,5214,6566,7378,11164,55268,55862,164668,283927	ACY1,BCAT1,CRYM,CTH,FAH,FPGS,MARS1,MTR,MTRR,PPAT,PRODH,PSPH,SHMT1,GCAT,DALRD3,VARS2,TARS2,GPT2,HPDL,MARS2,TARS3,CARNMT1,GAMT,GATM,RPL10,TST,SLC25A15,LIAS,RPL22L1,PNP,PFKP,SLC16A1,UPP1,NUDT5,ECHDC2,ECHDC1,APOBEC3H,NUDT7	38/-
3_Member	GO Biological Processes	GO:0006520	amino acid metabolic process	-9.74724	-6.30177	95,586,1428,1491,2184,2356,4141,4548,4552,5471,5625,5723,6470,23464,55152,57176,80222,84706,84842,92935,123283,138199	ACY1,BCAT1,CRYM,CTH,FAH,FPGS,MARS1,MTR,MTRR,PPAT,PRODH,PSPH,SHMT1,GCAT,DALRD3,VARS2,TARS2,GPT2,HPDL,MARS2,TARS3,CARNMT1	22/281
3_Member	Reactome Gene Sets	R-HSA-71291	Metabolism of amino acids and derivatives	-6.14148	-3.22429	586,1428,1491,2184,2593,2628,4141,4548,4552,5625,5723,6134,6470,7263,10166,11019,23464,84706,138199,200916	BCAT1,CRYM,CTH,FAH,GAMT,GATM,MARS1,MTR,MTRR,PRODH,PSPH,RPL10,SHMT1,TST,SLC25A15,LIAS,GCAT,GPT2,CARNMT1,RPL22L1	20/376
3_Member	GO Biological Processes	GO:0044282	small molecule catabolic process	-5.33205	-2.64625	1428,2184,4552,4860,5214,5625,6470,6566,7263,7378,11164,23464,55268,55862,84706,138199,164668,283927	CRYM,FAH,MTRR,PNP,PFKP,PRODH,SHMT1,SLC16A1,TST,UPP1,NUDT5,GCAT,ECHDC2,ECHDC1,GPT2,CARNMT1,APOBEC3H,NUDT7	18/353
3_Member	GO Biological Processes	GO:1901605	alpha-amino acid metabolic process	-5.16054	-2.50218	586,1428,1491,2184,2356,4548,4552,5471,5625,5723,6470,23464,84706	BCAT1,CRYM,CTH,FAH,FPGS,MTR,MTRR,PPAT,PRODH,PSPH,SHMT1,GCAT,GPT2	13/198
3_Member	GO Biological Processes	GO:0016054	organic acid catabolic process	-4.39286	-1.94193	1428,2184,4552,5625,6470,6566,7263,23464,55268,55862,84706,138199,283927	CRYM,FAH,MTRR,PRODH,SHMT1,SLC16A1,TST,GCAT,ECHDC2,ECHDC1,GPT2,CARNMT1,NUDT7	13/234
3_Member	GO Biological Processes	GO:0046395	carboxylic acid catabolic process	-4.39286	-1.94193	1428,2184,4552,5625,6470,6566,7263,23464,55268,55862,84706,138199,283927	CRYM,FAH,MTRR,PRODH,SHMT1,SLC16A1,TST,GCAT,ECHDC2,ECHDC1,GPT2,CARNMT1,NUDT7	13/234
3_Member	GO Biological Processes	GO:0009063	amino acid catabolic process	-3.66749	-1.4193	1428,2184,4552,5625,6470,23464,84706,138199	CRYM,FAH,MTRR,PRODH,SHMT1,GCAT,GPT2,CARNMT1	8/111
3_Member	GO Biological Processes	GO:1901606	alpha-amino acid catabolic process	-3.4469	-1.27153	1428,2184,4552,5625,6470,23464,84706	CRYM,FAH,MTRR,PRODH,SHMT1,GCAT,GPT2	7/91
4_Summary	GO Biological Processes	GO:0042254	ribosome biogenesis	-8.1785	-4.87133	2068,3692,6134,10360,10438,10557,10799,26284,26574,27079,29081,51335,54475,54853,55052,55781,79863,84273,85395,130916,196074,6628,79760,79833,83640,4141	ERCC2,EIF6,RPL10,NPM3,C1D,RPP38,RPP40,ERAL1,AATF,RPUSD2,METTL5,NGRN,NLE1,WDR55,MRPL20,RIOK2,RBFA,NOA1,SLX9,MTERF4,METTL15,SNRPB,GEMIN7,GEMIN6,RAMAC,MARS1	26/-
4_Member	GO Biological Processes	GO:0042254	ribosome biogenesis	-8.1785	-4.87133	2068,3692,6134,10360,10438,10557,10799,26284,26574,27079,29081,51335,54475,54853,55052,55781,79863,84273,85395,130916,196074	ERCC2,EIF6,RPL10,NPM3,C1D,RPP38,RPP40,ERAL1,AATF,RPUSD2,METTL5,NGRN,NLE1,WDR55,MRPL20,RIOK2,RBFA,NOA1,SLX9,MTERF4,METTL15	21/311
4_Member	GO Biological Processes	GO:0022613	ribonucleoprotein complex biogenesis	-7.21396	-4.09585	2068,3692,6134,6628,10360,10438,10557,10799,26284,26574,27079,29081,51335,54475,54853,55052,55781,79760,79833,79863,83640,84273,85395,130916,196074	ERCC2,EIF6,RPL10,SNRPB,NPM3,C1D,RPP38,RPP40,ERAL1,AATF,RPUSD2,METTL5,NGRN,NLE1,WDR55,MRPL20,RIOK2,GEMIN7,GEMIN6,RBFA,RAMAC,NOA1,SLX9,MTERF4,METTL15	25/488
4_Member	GO Biological Processes	GO:0006364	rRNA processing	-5.44641	-2.70809	2068,3692,10360,10438,10557,10799,27079,29081,54853,55781,79863,85395,130916,196074	ERCC2,EIF6,NPM3,C1D,RPP38,RPP40,RPUSD2,METTL5,WDR55,RIOK2,RBFA,SLX9,MTERF4,METTL15	14/216
4_Member	GO Biological Processes	GO:0016072	rRNA metabolic process	-5.44386	-2.70809	2068,3692,4141,10360,10438,10557,10799,27079,29081,54853,55781,79863,85395,130916,196074	ERCC2,EIF6,MARS1,NPM3,C1D,RPP38,RPP40,RPUSD2,METTL5,WDR55,RIOK2,RBFA,SLX9,MTERF4,METTL15	15/247
4_Member	GO Biological Processes	GO:0042274	ribosomal small subunit biogenesis	-2.37106	-0.619884	2068,10799,26284,26574,55781,85395	ERCC2,RPP40,ERAL1,AATF,RIOK2,SLX9	6/105
4_Member	GO Biological Processes	GO:0030490	maturation of SSU-rRNA	-2.11374	-0.458906	2068,10799,55781,85395	ERCC2,RPP40,RIOK2,SLX9	4/54
5_Summary	GO Biological Processes	GO:0009123	nucleoside monophosphate metabolic process	-7.90434	-4.63496	205,318,1723,2987,3251,3614,4860,5471,6470,7378,10591,955,11164,79077,4351,5372,6120,10654,22934,51422,64841,83594,84836,93100,164668,283927,641371,1120,2171,3628,5336,23761,51477,55163,80157,154141,254531,51020,95,2952,5243,6566,7172,10257,2583,8705,8706,27090,54790,84892,166012	AK4,NUDT2,DHODH,GUK1,HPRT1,IMPDH1,PNP,PPAT,SHMT1,UPP1,DNPH1,ENTPD6,NUDT5,DCTPP1,MPI,PMM1,RPE,PMVK,RPIA,PRKAG2,GNPNAT1,NUDT12,ABHD14B,NAPRT,APOBEC3H,NUDT7,ACOT1,CHKB,FABP5,INPP1,PLCG2,PISD,ISYNA1,PNPO,CWH43,MBOAT1,LPCAT4,HDDC2,ACY1,GSTT1,ABCB1,SLC16A1,TPMT,ABCC4,B4GALNT1,B3GALT4,B3GALNT1,ST6GALNAC4,TET2,POMGNT2,CHST13	51/-
5_Member	GO Biological Processes	GO:0009123	nucleoside monophosphate metabolic process	-7.90434	-4.63496	205,318,1723,2987,3251,3614,4860,5471,6470,7378,10591	AK4,NUDT2,DHODH,GUK1,HPRT1,IMPDH1,PNP,PPAT,SHMT1,UPP1,DNPH1	11/76
5_Member	Reactome Gene Sets	R-HSA-15869	Metabolism of nucleotides	-7.67368	-4.43907	205,955,1723,2987,3251,3614,4860,5471,7378,10591,11164,79077	AK4,ENTPD6,DHODH,GUK1,HPRT1,IMPDH1,PNP,PPAT,UPP1,DNPH1,NUDT5,DCTPP1	12/99
5_Member	GO Biological Processes	GO:0055086	nucleobase-containing small molecule metabolic process	-7.28492	-4.12061	205,318,955,1723,2987,3251,3614,4351,4860,5372,5471,6120,6470,7378,10591,10654,11164,22934,51422,64841,79077,83594,84836,93100,164668,283927,641371	AK4,NUDT2,ENTPD6,DHODH,GUK1,HPRT1,IMPDH1,MPI,PNP,PMM1,PPAT,RPE,SHMT1,UPP1,DNPH1,PMVK,NUDT5,RPIA,PRKAG2,GNPNAT1,DCTPP1,NUDT12,ABHD14B,NAPRT,APOBEC3H,NUDT7,ACOT1	27/555
5_Member	GO Biological Processes	GO:0009161	ribonucleoside monophosphate metabolic process	-6.77544	-3.78861	205,318,1723,2987,3251,3614,4860,5471,7378	AK4,NUDT2,DHODH,GUK1,HPRT1,IMPDH1,PNP,PPAT,UPP1	9/59
5_Member	GO Biological Processes	GO:0006753	nucleoside phosphate metabolic process	-6.06985	-3.16845	205,318,955,1723,2987,3251,3614,4860,5471,6120,6470,7378,10591,10654,11164,22934,51422,79077,83594,84836,93100,283927,641371	AK4,NUDT2,ENTPD6,DHODH,GUK1,HPRT1,IMPDH1,PNP,PPAT,RPE,SHMT1,UPP1,DNPH1,PMVK,NUDT5,RPIA,PRKAG2,DCTPP1,NUDT12,ABHD14B,NAPRT,NUDT7,ACOT1	23/487
5_Member	GO Biological Processes	GO:0090407	organophosphate biosynthetic process	-5.82974	-2.98633	205,318,1120,1723,2171,2987,3251,3614,3628,4860,5336,5471,6470,7378,10654,23761,51422,51477,55163,80157,83594,93100,154141,254531	AK4,NUDT2,CHKB,DHODH,FABP5,GUK1,HPRT1,IMPDH1,INPP1,PNP,PLCG2,PPAT,SHMT1,UPP1,PMVK,PISD,PRKAG2,ISYNA1,PNPO,CWH43,NUDT12,NAPRT,MBOAT1,LPCAT4	24/541
5_Member	GO Biological Processes	GO:0009124	nucleoside monophosphate biosynthetic process	-5.66052	-2.84472	318,1723,3251,3614,5471,6470,7378	NUDT2,DHODH,HPRT1,IMPDH1,PPAT,SHMT1,UPP1	7/42
5_Member	GO Biological Processes	GO:0009167	purine ribonucleoside monophosphate metabolic process	-5.66052	-2.84472	205,318,2987,3251,3614,4860,5471	AK4,NUDT2,GUK1,HPRT1,IMPDH1,PNP,PPAT	7/42
5_Member	GO Biological Processes	GO:0009117	nucleotide metabolic process	-5.64921	-2.84472	205,318,1723,2987,3251,3614,4860,5471,6120,6470,7378,10591,10654,11164,22934,51422,79077,83594,84836,93100,283927,641371	AK4,NUDT2,DHODH,GUK1,HPRT1,IMPDH1,PNP,PPAT,RPE,SHMT1,UPP1,DNPH1,PMVK,NUDT5,RPIA,PRKAG2,DCTPP1,NUDT12,ABHD14B,NAPRT,NUDT7,ACOT1	22/478
5_Member	GO Biological Processes	GO:0009126	purine nucleoside monophosphate metabolic process	-5.51891	-2.74759	205,318,2987,3251,3614,4860,5471	AK4,NUDT2,GUK1,HPRT1,IMPDH1,PNP,PPAT	7/44
5_Member	KEGG Pathway	hsa01232	Nucleotide metabolism	-5.4038	-2.68871	205,955,2987,3251,3614,4860,7378,51020,79077	AK4,ENTPD6,GUK1,HPRT1,IMPDH1,PNP,UPP1,HDDC2,DCTPP1	9/85
5_Member	Reactome Gene Sets	R-HSA-9748784	Drug ADME	-5.33365	-2.64625	95,2952,2987,3251,3614,4860,5243,6566,7172,10257	ACY1,GSTT1,GUK1,HPRT1,IMPDH1,PNP,ABCB1,SLC16A1,TPMT,ABCC4	10/110
5_Member	GO Biological Processes	GO:0009156	ribonucleoside monophosphate biosynthetic process	-5.07602	-2.43503	318,1723,3251,3614,5471,7378	NUDT2,DHODH,HPRT1,IMPDH1,PPAT,UPP1	6/34
5_Member	WikiPathways	WP4224	Purine metabolism and related disorders	-4.8783	-2.27793	3251,3614,4860,5471,7172	HPRT1,IMPDH1,PNP,PPAT,TPMT	5/22
5_Member	KEGG Pathway	hsa00230	Purine metabolism	-4.74909	-2.16396	205,318,955,2987,3251,3614,4860,5471,11164,51020	AK4,NUDT2,ENTPD6,GUK1,HPRT1,IMPDH1,PNP,PPAT,NUDT5,HDDC2	10/128
5_Member	Reactome Gene Sets	R-HSA-9748787	Azathioprine ADME	-4.68073	-2.10302	2987,3251,3614,7172,10257	GUK1,HPRT1,IMPDH1,TPMT,ABCC4	5/24
5_Member	GO Biological Processes	GO:0072521	purine-containing compound metabolic process	-4.44487	-1.96555	205,318,2987,3251,3614,4860,5471,6120,6470,10591,10654,11164,22934,51422,83594,84836,93100,283927,641371	AK4,NUDT2,GUK1,HPRT1,IMPDH1,PNP,PPAT,RPE,SHMT1,DNPH1,PMVK,NUDT5,RPIA,PRKAG2,NUDT12,ABHD14B,NAPRT,NUDT7,ACOT1	19/450
5_Member	GO Biological Processes	GO:0006163	purine nucleotide metabolic process	-4.32478	-1.8953	205,318,2987,3251,3614,4860,5471,6120,10591,10654,11164,22934,51422,83594,84836,93100,283927,641371	AK4,NUDT2,GUK1,HPRT1,IMPDH1,PNP,PPAT,RPE,DNPH1,PMVK,NUDT5,RPIA,PRKAG2,NUDT12,ABHD14B,NAPRT,NUDT7,ACOT1	18/420
5_Member	GO Biological Processes	GO:1901137	carbohydrate derivative biosynthetic process	-4.19612	-1.79204	205,318,1723,2583,2987,3251,3614,4351,4860,5372,5471,6470,7378,8705,8706,27090,51422,54790,64841,80157,84892,166012	AK4,NUDT2,DHODH,B4GALNT1,GUK1,HPRT1,IMPDH1,MPI,PNP,PMM1,PPAT,SHMT1,UPP1,B3GALT4,B3GALNT1,ST6GALNAC4,PRKAG2,TET2,GNPNAT1,CWH43,POMGNT2,CHST13	22/594
5_Member	GO Biological Processes	GO:0019693	ribose phosphate metabolic process	-3.96713	-1.63271	205,318,1723,2987,3251,3614,4860,5471,7378,10654,11164,22934,51422,84836,283927,641371	AK4,NUDT2,DHODH,GUK1,HPRT1,IMPDH1,PNP,PPAT,UPP1,PMVK,NUDT5,RPIA,PRKAG2,ABHD14B,NUDT7,ACOT1	16/369
5_Member	GO Biological Processes	GO:0046112	nucleobase biosynthetic process	-3.95064	-1.63271	1723,3251,5471,6470	DHODH,HPRT1,PPAT,SHMT1	4/18
5_Member	GO Biological Processes	GO:0009165	nucleotide biosynthetic process	-3.87977	-1.58044	205,318,1723,2987,3251,3614,4860,5471,6470,7378,51422,83594,93100	AK4,NUDT2,DHODH,GUK1,HPRT1,IMPDH1,PNP,PPAT,SHMT1,UPP1,PRKAG2,NUDT12,NAPRT	13/263
5_Member	GO Biological Processes	GO:1901293	nucleoside phosphate biosynthetic process	-3.84723	-1.56313	205,318,1723,2987,3251,3614,4860,5471,6470,7378,51422,83594,93100	AK4,NUDT2,DHODH,GUK1,HPRT1,IMPDH1,PNP,PPAT,SHMT1,UPP1,PRKAG2,NUDT12,NAPRT	13/265
5_Member	GO Biological Processes	GO:0009168	purine ribonucleoside monophosphate biosynthetic process	-3.76101	-1.50236	318,3251,3614,5471	NUDT2,HPRT1,IMPDH1,PPAT	4/20
5_Member	GO Biological Processes	GO:0009127	purine nucleoside monophosphate biosynthetic process	-3.59202	-1.36804	318,3251,3614,5471	NUDT2,HPRT1,IMPDH1,PPAT	4/22
5_Member	GO Biological Processes	GO:0009259	ribonucleotide metabolic process	-3.56981	-1.35159	205,318,1723,2987,3251,3614,4860,5471,7378,10654,11164,51422,84836,283927,641371	AK4,NUDT2,DHODH,GUK1,HPRT1,IMPDH1,PNP,PPAT,UPP1,PMVK,NUDT5,PRKAG2,ABHD14B,NUDT7,ACOT1	15/360
5_Member	GO Biological Processes	GO:0009113	purine nucleobase biosynthetic process	-3.47707	-1.28797	3251,5471,6470	HPRT1,PPAT,SHMT1	3/10
5_Member	GO Biological Processes	GO:0046033	AMP metabolic process	-3.36902	-1.2353	205,318,3251,5471	AK4,NUDT2,HPRT1,PPAT	4/25
5_Member	GO Biological Processes	GO:0046037	GMP metabolic process	-3.23674	-1.13369	2987,3251,3614,5471	GUK1,HPRT1,IMPDH1,PPAT	4/27
5_Member	GO Biological Processes	GO:0072522	purine-containing compound biosynthetic process	-3.12738	-1.08131	205,318,2987,3251,3614,4860,5471,6470,51422,83594,93100	AK4,NUDT2,GUK1,HPRT1,IMPDH1,PNP,PPAT,SHMT1,PRKAG2,NUDT12,NAPRT	11/238
5_Member	WikiPathways	WP4792	Purine metabolism	-3.1139	-1.08131	3251,3614,4860	HPRT1,IMPDH1,PNP	3/13
5_Member	GO Biological Processes	GO:0006167	AMP biosynthetic process	-3.01383	-1.03263	318,3251,5471	NUDT2,HPRT1,PPAT	3/14
5_Member	GO Biological Processes	GO:0006177	GMP biosynthetic process	-3.01383	-1.03263	3251,3614,5471	HPRT1,IMPDH1,PPAT	3/14
5_Member	Reactome Gene Sets	R-HSA-8956320	Nucleotide biosynthesis	-3.01383	-1.03263	1723,3614,5471	DHODH,IMPDH1,PPAT	3/14
5_Member	GO Biological Processes	GO:0009112	nucleobase metabolic process	-2.84931	-0.922361	1723,3251,5471,6470	DHODH,HPRT1,PPAT,SHMT1	4/34
5_Member	GO Biological Processes	GO:0009150	purine ribonucleotide metabolic process	-2.81979	-0.910568	205,318,2987,3251,3614,4860,5471,10654,11164,51422,84836,283927,641371	AK4,NUDT2,GUK1,HPRT1,IMPDH1,PNP,PPAT,PMVK,NUDT5,PRKAG2,ABHD14B,NUDT7,ACOT1	13/341
5_Member	GO Biological Processes	GO:0046040	IMP metabolic process	-2.68187	-0.823709	3251,4860,5471	HPRT1,PNP,PPAT	3/18
5_Member	GO Biological Processes	GO:0006144	purine nucleobase metabolic process	-2.54596	-0.741348	3251,5471,6470	HPRT1,PPAT,SHMT1	3/20
5_Member	KEGG Pathway	hsa00983	Drug metabolism - other enzymes	-2.21488	-0.517596	2952,3251,3614,7172,7378	GSTT1,HPRT1,IMPDH1,TPMT,UPP1	5/80
5_Member	GO Biological Processes	GO:0006164	purine nucleotide biosynthetic process	-2.19583	-0.503366	205,318,2987,3251,3614,5471,51422,83594,93100	AK4,NUDT2,GUK1,HPRT1,IMPDH1,PPAT,PRKAG2,NUDT12,NAPRT	9/229
6_Summary	KEGG Pathway	hsa01240	Biosynthesis of cofactors	-7.26505	-4.12061	205,249,586,1355,1723,2356,4351,5372,6470,8836,11019,55163,84274,93100	AK4,ALPL,BCAT1,COX15,DHODH,FPGS,MPI,PMM1,SHMT1,GGH,LIAS,PNPO,COQ5,NAPRT	14/-
6_Member	KEGG Pathway	hsa01240	Biosynthesis of cofactors	-7.26505	-4.12061	205,249,586,1355,1723,2356,4351,5372,6470,8836,11019,55163,84274,93100	AK4,ALPL,BCAT1,COX15,DHODH,FPGS,MPI,PMM1,SHMT1,GGH,LIAS,PNPO,COQ5,NAPRT	14/153
7_Summary	GO Biological Processes	GO:0044283	small molecule biosynthetic process	-7.16559	-4.07231	586,672,1382,1491,2593,2628,3251,4548,4552,4860,5336,5723,5947,6470,10654,11019,23590,29108,29914,51422,51477,55163,55818,84274,1573,2184,5214,6566,29785,55268,55862,145482,283927,641371	BCAT1,BRCA1,CRABP2,CTH,GAMT,GATM,HPRT1,MTR,MTRR,PNP,PLCG2,PSPH,RBP1,SHMT1,PMVK,LIAS,PDSS1,PYCARD,UBIAD1,PRKAG2,ISYNA1,PNPO,KDM3A,COQ5,CYP2J2,FAH,PFKP,SLC16A1,CYP2S1,ECHDC2,ECHDC1,PTGR2,NUDT7,ACOT1	34/-
7_Member	GO Biological Processes	GO:0044283	small molecule biosynthetic process	-7.16559	-4.07231	586,672,1382,1491,2593,2628,3251,4548,4552,4860,5336,5723,5947,6470,10654,11019,23590,29108,29914,51422,51477,55163,55818,84274	BCAT1,BRCA1,CRABP2,CTH,GAMT,GATM,HPRT1,MTR,MTRR,PNP,PLCG2,PSPH,RBP1,SHMT1,PMVK,LIAS,PDSS1,PYCARD,UBIAD1,PRKAG2,ISYNA1,PNPO,KDM3A,COQ5	24/456
7_Member	GO Biological Processes	GO:0046394	carboxylic acid biosynthetic process	-4.28802	-1.86888	586,672,1382,1491,2593,2628,4548,4552,5723,5947,6470,11019,29108,51422	BCAT1,BRCA1,CRABP2,CTH,GAMT,GATM,MTR,MTRR,PSPH,RBP1,SHMT1,LIAS,PYCARD,PRKAG2	14/274
7_Member	GO Biological Processes	GO:0016053	organic acid biosynthetic process	-4.23713	-1.82809	586,672,1382,1491,2593,2628,4548,4552,5723,5947,6470,11019,29108,51422	BCAT1,BRCA1,CRABP2,CTH,GAMT,GATM,MTR,MTRR,PSPH,RBP1,SHMT1,LIAS,PYCARD,PRKAG2	14/277
7_Member	GO Biological Processes	GO:0032787	monocarboxylic acid metabolic process	-2.8521	-0.923497	672,1382,1573,2184,2593,2628,5214,5947,6566,11019,29785,51422,55268,55862,145482,283927,641371	BRCA1,CRABP2,CYP2J2,FAH,GAMT,GATM,PFKP,RBP1,SLC16A1,LIAS,CYP2S1,PRKAG2,ECHDC2,ECHDC1,PTGR2,NUDT7,ACOT1	17/512
8_Summary	KEGG Pathway	hsa01230	Biosynthesis of amino acids	-6.89128	-3.86494	95,586,1491,4548,5214,5723,6120,6470,22934,84706,6510,6566,64841,5471	ACY1,BCAT1,CTH,MTR,PFKP,PSPH,RPE,SHMT1,RPIA,GPT2,SLC1A5,SLC16A1,GNPNAT1,PPAT	14/-
8_Member	KEGG Pathway	hsa01230	Biosynthesis of amino acids	-6.89128	-3.86494	95,586,1491,4548,5214,5723,6120,6470,22934,84706	ACY1,BCAT1,CTH,MTR,PFKP,PSPH,RPE,SHMT1,RPIA,GPT2	10/75
8_Member	WikiPathways	WP5220	Metabolic reprogramming in pancreatic cancer	-3.47217	-1.28797	6120,6510,6566,22934,64841	RPE,SLC1A5,SLC16A1,RPIA,GNPNAT1	5/42
8_Member	WikiPathways	WP4290	Metabolic reprogramming in colon cancer	-2.50605	-0.716198	5471,5723,6510,22934	PPAT,PSPH,SLC1A5,RPIA	4/42
8_Member	KEGG Pathway	hsa01200	Carbon metabolism	-2.18034	-0.495486	5214,5723,6120,6470,22934,84706	PFKP,PSPH,RPE,SHMT1,RPIA,GPT2	6/115
8_Member	KEGG Pathway	hsa00030	Pentose phosphate pathway	-2.0406	-0.414679	5214,6120,22934	PFKP,RPE,RPIA	3/30
9_Summary	GO Biological Processes	GO:0006575	cellular modified amino acid metabolic process	-6.85664	-3.8505	1428,2356,2593,2628,4548,4552,5625,6470,8836,87769,154141,254531,1491,4141,92935,114112,586,1120,1788,5723,6647,249,5947,29914,55163,84883,23590,83594,84274,93100,5340,7263,7172,23464,2952,79017,84836	CRYM,FPGS,GAMT,GATM,MTR,MTRR,PRODH,SHMT1,GGH,GGACT,MBOAT1,LPCAT4,CTH,MARS1,MARS2,TXNRD3,BCAT1,CHKB,DNMT3A,PSPH,SOD1,ALPL,RBP1,UBIAD1,PNPO,AIFM2,PDSS1,NUDT12,COQ5,NAPRT,PLG,TST,TPMT,GCAT,GSTT1,GGCT,ABHD14B	37/-
9_Member	GO Biological Processes	GO:0006575	cellular modified amino acid metabolic process	-6.85664	-3.8505	1428,2356,2593,2628,4548,4552,5625,6470,8836,87769,154141,254531	CRYM,FPGS,GAMT,GATM,MTR,MTRR,PRODH,SHMT1,GGH,GGACT,MBOAT1,LPCAT4	12/117
9_Member	KEGG Pathway	hsa00450	Selenocompound metabolism	-5.48137	-2.72388	1491,4141,4548,92935,114112	CTH,MARS1,MTR,MARS2,TXNRD3	5/17
9_Member	WikiPathways	WP2525	Trans-sulfuration, one-carbon metabolism and related pathways	-5.20947	-2.54215	586,1120,1491,1788,4548,5723,6470,6647	BCAT1,CHKB,CTH,DNMT3A,MTR,PSPH,SHMT1,SOD1	8/68
9_Member	GO Biological Processes	GO:0006766	vitamin metabolic process	-4.89322	-2.28503	249,2356,4548,4552,5947,6470,29914,55163,84883	ALPL,FPGS,MTR,MTRR,RBP1,SHMT1,UBIAD1,PNPO,AIFM2	9/98
9_Member	GO Biological Processes	GO:0006760	folic acid-containing compound metabolic process	-4.5014	-2.0041	2356,4548,4552,6470,8836	FPGS,MTR,MTRR,SHMT1,GGH	5/26
9_Member	GO Biological Processes	GO:0042558	pteridine-containing compound metabolic process	-4.04645	-1.69353	2356,4548,4552,6470,8836	FPGS,MTR,MTRR,SHMT1,GGH	5/32
9_Member	Reactome Gene Sets	R-HSA-196854	Metabolism of vitamins and cofactors	-3.94294	-1.63181	2356,4548,4552,5947,6470,23590,29914,55163,83594,84274,93100	FPGS,MTR,MTRR,RBP1,SHMT1,PDSS1,UBIAD1,PNPO,NUDT12,COQ5,NAPRT	11/191
9_Member	GO Biological Processes	GO:0006767	water-soluble vitamin metabolic process	-3.72441	-1.47276	249,2356,4548,4552,6470,55163	ALPL,FPGS,MTR,MTRR,SHMT1,PNPO	6/58
9_Member	GO Biological Processes	GO:1901607	alpha-amino acid biosynthetic process	-3.37987	-1.23543	586,1491,4548,4552,5723,6470	BCAT1,CTH,MTR,MTRR,PSPH,SHMT1	6/67
9_Member	WikiPathways	WP176	Folate metabolism	-3.31076	-1.19773	1491,4548,4552,5340,6470,6647	CTH,MTR,MTRR,PLG,SHMT1,SOD1	6/69
9_Member	GO Biological Processes	GO:0008652	amino acid biosynthetic process	-3.11703	-1.08131	586,1491,4548,4552,5723,6470	BCAT1,CTH,MTR,MTRR,PSPH,SHMT1	6/75
9_Member	Reactome Gene Sets	R-HSA-1614635	Sulfur amino acid metabolism	-3.11523	-1.08131	1491,4548,4552,7263	CTH,MTR,MTRR,TST	4/29
9_Member	WikiPathways	WP241	One-carbon metabolism	-3.11523	-1.08131	1788,4548,4552,6470	DNMT3A,MTR,MTRR,SHMT1	4/29
9_Member	GO Biological Processes	GO:0050667	homocysteine metabolic process	-3.1139	-1.08131	1491,4548,4552	CTH,MTR,MTRR	3/13
9_Member	WikiPathways	WP1533	Vitamin B12 metabolism	-3.0772	-1.0498	1491,4548,4552,5340,6647	CTH,MTR,MTRR,PLG,SOD1	5/51
9_Member	KEGG Pathway	hsa00270	Cysteine and methionine metabolism	-3.03842	-1.03263	586,1491,1788,4548,7263	BCAT1,CTH,DNMT3A,MTR,TST	5/52
9_Member	Reactome Gene Sets	R-HSA-156581	Methylation	-3.01383	-1.03263	4548,4552,7172	MTR,MTRR,TPMT	3/14
9_Member	GO Biological Processes	GO:0046655	folic acid metabolic process	-2.92158	-0.9727	2356,4552,6470	FPGS,MTRR,SHMT1	3/15
9_Member	GO Biological Processes	GO:0000096	sulfur amino acid metabolic process	-2.89874	-0.95672	1491,4548,4552,7263	CTH,MTR,MTRR,TST	4/33
9_Member	WikiPathways	WP15	Selenium micronutrient network	-2.80638	-0.906525	1491,4548,5340,6647,55163,114112	CTH,MTR,PLG,SOD1,PNPO,TXNRD3	6/86
9_Member	GO Biological Processes	GO:0000097	sulfur amino acid biosynthetic process	-2.7564	-0.875107	1491,4548,4552	CTH,MTR,MTRR	3/17
9_Member	Reactome Gene Sets	R-HSA-196849	Metabolism of water-soluble vitamins and cofactors	-2.65433	-0.810922	2356,4548,4552,6470,55163,83594,93100	FPGS,MTR,MTRR,SHMT1,PNPO,NUDT12,NAPRT	7/124
9_Member	GO Biological Processes	GO:0009066	aspartate family amino acid metabolic process	-2.32822	-0.592232	1428,4548,4552,23464	CRYM,MTR,MTRR,GCAT	4/47
9_Member	Reactome Gene Sets	R-HSA-156580	Phase II - Conjugation of compounds	-2.29206	-0.57087	2952,4548,4552,7172,79017,84836	GSTT1,MTR,MTRR,TPMT,GGCT,ABHD14B	6/109
10_Summary	GO Biological Processes	GO:0097435	supramolecular fiber organization	-6.51079	-3.56018	408,1832,2670,3854,3856,3860,3861,3872,3880,4542,5317,7018,7428,10458,10677,10788,11075,11344,27229,29904,51673,54509,57580,57698,80179,116985,1525,3993,4287,10391,26499,50848,54961,55561	ARRB1,DSP,GFAP,KRT6B,KRT8,KRT13,KRT14,KRT17,KRT19,MYO1F,PKP1,TF,VHL,BAIAP2,AVIL,IQGAP2,STMN2,TWF2,TUBGCP4,EEF2K,TPPP3,RHOF,PREX1,SHTN1,MYO19,ARAP1,CXADR,LLGL2,ATXN3,CORO2B,PLEK2,F11R,SSH3,CDC42BPG	34/-
10_Member	GO Biological Processes	GO:0097435	supramolecular fiber organization	-6.51079	-3.56018	408,1832,2670,3854,3856,3860,3861,3872,3880,4542,5317,7018,7428,10458,10677,10788,11075,11344,27229,29904,51673,54509,57580,57698,80179,116985	ARRB1,DSP,GFAP,KRT6B,KRT8,KRT13,KRT14,KRT17,KRT19,MYO1F,PKP1,TF,VHL,BAIAP2,AVIL,IQGAP2,STMN2,TWF2,TUBGCP4,EEF2K,TPPP3,RHOF,PREX1,SHTN1,MYO19,ARAP1	26/569
10_Member	GO Biological Processes	GO:0030036	actin cytoskeleton organization	-5.37228	-2.66718	408,1525,3856,3880,3993,4287,4542,7018,10391,10458,10677,10788,11344,26499,29904,50848,54509,54961,55561,57580,57698,80179,116985	ARRB1,CXADR,KRT8,KRT19,LLGL2,ATXN3,MYO1F,TF,CORO2B,BAIAP2,AVIL,IQGAP2,TWF2,PLEK2,EEF2K,F11R,RHOF,SSH3,CDC42BPG,PREX1,SHTN1,MYO19,ARAP1	23/536
10_Member	GO Biological Processes	GO:0030029	actin filament-based process	-4.62412	-2.07491	408,1525,3856,3880,3993,4287,4542,7018,10391,10458,10677,10788,11344,26499,29904,50848,54509,54961,55561,57580,57698,80179,116985	ARRB1,CXADR,KRT8,KRT19,LLGL2,ATXN3,MYO1F,TF,CORO2B,BAIAP2,AVIL,IQGAP2,TWF2,PLEK2,EEF2K,F11R,RHOF,SSH3,CDC42BPG,PREX1,SHTN1,MYO19,ARAP1	23/597
10_Member	GO Biological Processes	GO:0007015	actin filament organization	-3.34103	-1.22036	408,4542,7018,10458,10677,10788,11344,54509,57580,57698,80179,116985	ARRB1,MYO1F,TF,BAIAP2,AVIL,IQGAP2,TWF2,RHOF,PREX1,SHTN1,MYO19,ARAP1	12/261
10_Member	GO Biological Processes	GO:0031032	actomyosin structure organization	-2.18034	-0.495486	408,3856,3880,10788,50848,55561	ARRB1,KRT8,KRT19,IQGAP2,F11R,CDC42BPG	6/115
11_Summary	GO Biological Processes	GO:0006259	DNA metabolic process	-6.32174	-3.38816	580,672,1788,2068,2966,3364,4287,4437,4552,5810,6418,7013,7323,7335,7336,9978,10635,11200,51347,54790,55388,56647,56652,57646,57673,79077,84153,84939,92675,164668,221656,6657,8260,9314,10040,25793,54888,57099,4609,5336,6595,11190,11319,55781,55920,57132,80179,2810,10397,26574,29108,91801,7534,5519,5875,9337,27244,51422,84883,54475,958,5481,50848,83959,5501,7321,5451,10381,23291,27229,1164,10257	BARD1,BRCA1,DNMT3A,ERCC2,GTF2H2,HUS1,ATXN3,MSH3,MTRR,RAD1,SET,TERF1,UBE2D3,UBE2V1,UBE2V2,RBX1,RAD51AP1,CHEK2,TAOK3,TET2,MCM10,BCCIP,TWNK,USP28,BEND3,DCTPP1,RNASEH2C,PWWP3A,DTD1,APOBEC3H,KDM1B,SOX2,NAA10,KLF4,TOM1L1,FBXO7,NSUN2,AVEN,MYC,PLCG2,SMARCA2,CEP250,ECD,RIOK2,RCC2,CHMP1B,MYO19,SFN,NDRG1,AATF,PYCARD,ALKBH8,YWHAZ,PPP2R1B,RABGGTA,CNOT8,SESN1,PRKAG2,AIFM2,NLE1,CD40,PPID,F11R,SLC4A11,PPP1CC,UBE…	72/-
11_Member	GO Biological Processes	GO:0006259	DNA metabolic process	-6.32174	-3.38816	580,672,1788,2068,2966,3364,4287,4437,4552,5810,6418,7013,7323,7335,7336,9978,10635,11200,51347,54790,55388,56647,56652,57646,57673,79077,84153,84939,92675,164668,221656	BARD1,BRCA1,DNMT3A,ERCC2,GTF2H2,HUS1,ATXN3,MSH3,MTRR,RAD1,SET,TERF1,UBE2D3,UBE2V1,UBE2V2,RBX1,RAD51AP1,CHEK2,TAOK3,TET2,MCM10,BCCIP,TWNK,USP28,BEND3,DCTPP1,RNASEH2C,PWWP3A,DTD1,APOBEC3H,KDM1B	31/780
11_Member	CORUM	CORUM:2822	E3 ubiquitin ligase (BRCA1, BARD1) - UbcH5c complex	-5.52342	-2.74759	580,672,7323	BARD1,BRCA1,UBE2D3	3/3
11_Member	GO Biological Processes	GO:0010948	negative regulation of cell cycle process	-4.6313	-2.07491	580,672,3364,5810,6657,7013,8260,9314,10040,11200,25793,51347,54888,57099,57646	BARD1,BRCA1,HUS1,RAD1,SOX2,TERF1,NAA10,KLF4,TOM1L1,CHEK2,FBXO7,TAOK3,NSUN2,AVEN,USP28	15/289
11_Member	GO Biological Processes	GO:0010564	regulation of cell cycle process	-4.40925	-1.94193	580,672,2068,3364,4609,5336,5810,6595,6657,7013,8260,9314,10040,10635,11190,11200,11319,25793,51347,54888,55781,55920,57099,57132,57646,80179	BARD1,BRCA1,ERCC2,HUS1,MYC,PLCG2,RAD1,SMARCA2,SOX2,TERF1,NAA10,KLF4,TOM1L1,RAD51AP1,CEP250,CHEK2,ECD,FBXO7,TAOK3,NSUN2,RIOK2,RCC2,AVEN,CHMP1B,USP28,MYO19	26/746
11_Member	GO Biological Processes	GO:0006974	DNA damage response	-4.34219	-1.90745	580,672,2068,2810,2966,3364,4287,4437,4609,5810,7323,7335,7336,9978,10397,10635,11200,26574,29108,51347,55388,56647,57646,84153,84939,91801	BARD1,BRCA1,ERCC2,SFN,GTF2H2,HUS1,ATXN3,MSH3,MYC,RAD1,UBE2D3,UBE2V1,UBE2V2,RBX1,NDRG1,RAD51AP1,CHEK2,AATF,PYCARD,TAOK3,MCM10,BCCIP,USP28,RNASEH2C,PWWP3A,ALKBH8	26/753
11_Member	Reactome Gene Sets	R-HSA-69473	G2/M DNA damage checkpoint	-4.17349	-1.77432	580,672,2810,3364,5810,7336,7534,11200	BARD1,BRCA1,SFN,HUS1,RAD1,UBE2V2,YWHAZ,CHEK2	8/94
11_Member	Reactome Gene Sets	R-HSA-3700989	Transcriptional Regulation by TP53	-4.06332	-1.69935	580,672,2068,2810,2966,3364,5519,5810,5875,7534,9337,10397,11200,27244,51422,84883	BARD1,BRCA1,ERCC2,SFN,GTF2H2,HUS1,PPP2R1B,RAD1,RABGGTA,YWHAZ,CNOT8,NDRG1,CHEK2,SESN1,PRKAG2,AIFM2	16/362
11_Member	Reactome Gene Sets	R-HSA-9675135	Diseases of DNA repair	-4.03917	-1.69061	580,672,3364,4437,5810,10635	BARD1,BRCA1,HUS1,MSH3,RAD1,RAD51AP1	6/51
11_Member	GO Biological Processes	GO:1901987	regulation of cell cycle phase transition	-3.87409	-1.57861	580,672,2068,3364,5336,5810,6595,6657,9314,11200,11319,25793,51347,54888,55781,55920,57099,57646	BARD1,BRCA1,ERCC2,HUS1,PLCG2,RAD1,SMARCA2,SOX2,KLF4,CHEK2,ECD,FBXO7,TAOK3,NSUN2,RIOK2,RCC2,AVEN,USP28	18/456
11_Member	GO Biological Processes	GO:0045786	negative regulation of cell cycle	-3.84724	-1.56313	580,672,3364,5810,6657,7013,8260,9314,10040,11200,25793,51347,54475,54888,57099,57646	BARD1,BRCA1,HUS1,RAD1,SOX2,TERF1,NAA10,KLF4,TOM1L1,CHEK2,FBXO7,TAOK3,NLE1,NSUN2,AVEN,USP28	16/378
11_Member	GO Biological Processes	GO:0006281	DNA repair	-3.81061	-1.5376	580,672,2068,2966,3364,4287,4437,5810,7323,7335,7336,9978,10635,11200,51347,56647,57646,84153,84939	BARD1,BRCA1,ERCC2,GTF2H2,HUS1,ATXN3,MSH3,RAD1,UBE2D3,UBE2V1,UBE2V2,RBX1,RAD51AP1,CHEK2,TAOK3,BCCIP,USP28,RNASEH2C,PWWP3A	19/503
11_Member	GO Biological Processes	GO:0010212	response to ionizing radiation	-3.63351	-1.39554	580,672,1788,3364,4609,5810,10635,11200,57646	BARD1,BRCA1,DNMT3A,HUS1,MYC,RAD1,RAD51AP1,CHEK2,USP28	9/142
11_Member	GO Biological Processes	GO:1901988	negative regulation of cell cycle phase transition	-3.62138	-1.39009	580,672,3364,5810,6657,9314,11200,25793,51347,54888,57099,57646	BARD1,BRCA1,HUS1,RAD1,SOX2,KLF4,CHEK2,FBXO7,TAOK3,NSUN2,AVEN,USP28	12/243
11_Member	GO Biological Processes	GO:0071214	cellular response to abiotic stimulus	-3.55494	-1.34626	580,672,958,3364,4609,5481,5810,9978,10635,11200,29108,50848,57646,83959	BARD1,BRCA1,CD40,HUS1,MYC,PPID,RAD1,RBX1,RAD51AP1,CHEK2,PYCARD,F11R,USP28,SLC4A11	14/322
11_Member	GO Biological Processes	GO:0104004	cellular response to environmental stimulus	-3.55494	-1.34626	580,672,958,3364,4609,5481,5810,9978,10635,11200,29108,50848,57646,83959	BARD1,BRCA1,CD40,HUS1,MYC,PPID,RAD1,RBX1,RAD51AP1,CHEK2,PYCARD,F11R,USP28,SLC4A11	14/322
11_Member	GO Biological Processes	GO:0071478	cellular response to radiation	-3.52952	-1.32709	580,672,3364,4609,5481,5810,9978,10635,11200,57646	BARD1,BRCA1,HUS1,MYC,PPID,RAD1,RBX1,RAD51AP1,CHEK2,USP28	10/179
11_Member	Reactome Gene Sets	R-HSA-9675136	Diseases of DNA Double-Strand Break Repair	-3.52208	-1.32581	580,672,3364,5810,10635	BARD1,BRCA1,HUS1,RAD1,RAD51AP1	5/41
11_Member	Reactome Gene Sets	R-HSA-9701190	Defective homologous recombination repair (HRR) due to BRCA2 loss of function	-3.52208	-1.32581	580,672,3364,5810,10635	BARD1,BRCA1,HUS1,RAD1,RAD51AP1	5/41
11_Member	Reactome Gene Sets	R-HSA-69620	Cell Cycle Checkpoints	-3.42462	-1.26276	580,672,2810,3364,5501,5519,5810,7321,7336,7534,11200,55388,55920	BARD1,BRCA1,SFN,HUS1,PPP1CC,PPP2R1B,RAD1,UBE2D1,UBE2V2,YWHAZ,CHEK2,MCM10,RCC2	13/293
11_Member	Reactome Gene Sets	R-HSA-5693579	Homologous DNA Pairing and Strand Exchange	-3.42362	-1.26276	580,672,3364,5810,10635	BARD1,BRCA1,HUS1,RAD1,RAD51AP1	5/43
11_Member	WikiPathways	WP1971	Integrated cancer pathway	-3.15753	-1.08313	580,672,4609,5451,11200	BARD1,BRCA1,MYC,POU2F1,CHEK2	5/49
11_Member	GO Biological Processes	GO:0071479	cellular response to ionizing radiation	-3.14799	-1.08131	580,672,3364,5810,10635,11200	BARD1,BRCA1,HUS1,RAD1,RAD51AP1,CHEK2	6/74
11_Member	Reactome Gene Sets	R-HSA-69481	G2/M Checkpoints	-3.11927	-1.08131	580,672,2810,3364,5810,7336,7534,11200,55388	BARD1,BRCA1,SFN,HUS1,RAD1,UBE2V2,YWHAZ,CHEK2,MCM10	9/167
11_Member	WikiPathways	WP4016	DNA IR-damage and cellular response via ATR	-2.94118	-0.976439	580,672,3364,5810,7323,11200	BARD1,BRCA1,HUS1,RAD1,UBE2D3,CHEK2	6/81
11_Member	Reactome Gene Sets	R-HSA-1640170	Cell Cycle	-2.906	-0.960567	580,672,2810,3364,4609,5501,5519,5810,6418,7013,7321,7336,7534,9978,10381,11190,11200,23291,27229,55388,55920	BARD1,BRCA1,SFN,HUS1,MYC,PPP1CC,PPP2R1B,RAD1,SET,TERF1,UBE2D1,UBE2V2,YWHAZ,RBX1,TUBB3,CEP250,CHEK2,FBXW11,TUBGCP4,MCM10,RCC2	21/691
11_Member	Reactome Gene Sets	R-HSA-9709570	Impaired BRCA2 binding to RAD51	-2.80154	-0.904769	580,672,3364,5810	BARD1,BRCA1,HUS1,RAD1	4/35
11_Member	GO Biological Processes	GO:0007346	regulation of mitotic cell cycle	-2.79863	-0.903389	580,672,1164,2068,3364,6595,9314,10040,11200,11319,25793,26574,51347,54475,55781,55920,57099	BARD1,BRCA1,CKS2,ERCC2,HUS1,SMARCA2,KLF4,TOM1L1,CHEK2,ECD,FBXO7,AATF,TAOK3,NLE1,RIOK2,RCC2,AVEN	17/518
11_Member	Reactome Gene Sets	R-HSA-5685938	HDR through Single Strand Annealing (SSA)	-2.71056	-0.837231	580,672,3364,5810	BARD1,BRCA1,HUS1,RAD1	4/37
11_Member	GO Biological Processes	GO:0045930	negative regulation of mitotic cell cycle	-2.71012	-0.837231	580,672,3364,9314,10040,11200,25793,51347,54475,57099	BARD1,BRCA1,HUS1,KLF4,TOM1L1,CHEK2,FBXO7,TAOK3,NLE1,AVEN	10/229
11_Member	GO Biological Processes	GO:0000075	cell cycle checkpoint signaling	-2.67811	-0.823702	580,672,3364,5810,11200,51347,54888,57646	BARD1,BRCA1,HUS1,RAD1,CHEK2,TAOK3,NSUN2,USP28	8/157
11_Member	GO Biological Processes	GO:0009314	response to radiation	-2.67065	-0.817817	580,672,1788,2068,2966,3364,4609,5481,5501,5810,9978,10635,11190,11200,57646	BARD1,BRCA1,DNMT3A,ERCC2,GTF2H2,HUS1,MYC,PPID,PPP1CC,RAD1,RBX1,RAD51AP1,CEP250,CHEK2,USP28	15/442
11_Member	GO Biological Processes	GO:1901990	regulation of mitotic cell cycle phase transition	-2.66669	-0.817817	580,672,2068,3364,6595,9314,11200,11319,25793,51347,55781,55920,57099	BARD1,BRCA1,ERCC2,HUS1,SMARCA2,KLF4,CHEK2,ECD,FBXO7,TAOK3,RIOK2,RCC2,AVEN	13/355
11_Member	Reactome Gene Sets	R-HSA-6804756	Regulation of TP53 Activity through Phosphorylation	-2.65684	-0.81207	580,672,3364,5810,11200,51422	BARD1,BRCA1,HUS1,RAD1,CHEK2,PRKAG2	6/92
11_Member	GO Biological Processes	GO:0010972	negative regulation of G2/M transition of mitotic cell cycle	-2.60264	-0.78171	580,672,3364,51347,57099	BARD1,BRCA1,HUS1,TAOK3,AVEN	5/65
11_Member	Reactome Gene Sets	R-HSA-5693616	Presynaptic phase of homologous DNA pairing and strand exchange	-2.58426	-0.768461	580,672,3364,5810	BARD1,BRCA1,HUS1,RAD1	4/40
11_Member	GO Biological Processes	GO:1902750	negative regulation of cell cycle G2/M phase transition	-2.54493	-0.741348	580,672,3364,51347,57099	BARD1,BRCA1,HUS1,TAOK3,AVEN	5/67
11_Member	Reactome Gene Sets	R-HSA-5685942	HDR through Homologous Recombination (HRR)	-2.51685	-0.720958	580,672,3364,5810,10635	BARD1,BRCA1,HUS1,RAD1,RAD51AP1	5/68
11_Member	GO Biological Processes	GO:0010389	regulation of G2/M transition of mitotic cell cycle	-2.454	-0.679471	580,672,3364,51347,55920,57099	BARD1,BRCA1,HUS1,TAOK3,RCC2,AVEN	6/101
11_Member	Reactome Gene Sets	R-HSA-73894	DNA Repair	-2.42635	-0.660994	580,672,2068,2966,3364,4437,5810,7013,7336,9978,10635,11200	BARD1,BRCA1,ERCC2,GTF2H2,HUS1,MSH3,RAD1,TERF1,UBE2V2,RBX1,RAD51AP1,CHEK2	12/335
11_Member	GO Biological Processes	GO:0042770	signal transduction in response to DNA damage	-2.37848	-0.622102	672,3364,5810,10397,11200,51347,57646	BRCA1,HUS1,RAD1,NDRG1,CHEK2,TAOK3,USP28	7/139
11_Member	GO Biological Processes	GO:0000077	DNA damage checkpoint signaling	-2.35095	-0.610917	672,3364,5810,11200,51347,57646	BRCA1,HUS1,RAD1,CHEK2,TAOK3,USP28	6/106
11_Member	GO Biological Processes	GO:1901991	negative regulation of mitotic cell cycle phase transition	-2.3164	-0.585735	580,672,3364,9314,11200,25793,51347,57099	BARD1,BRCA1,HUS1,KLF4,CHEK2,FBXO7,TAOK3,AVEN	8/180
11_Member	Reactome Gene Sets	R-HSA-9709603	Impaired BRCA2 binding to PALB2	-2.3152	-0.585735	580,672,10635	BARD1,BRCA1,RAD51AP1	3/24
11_Member	WikiPathways	WP2263	Androgen receptor network in prostate cancer	-2.2729	-0.557227	580,672,4609,10257,10397,11200	BARD1,BRCA1,MYC,ABCC4,NDRG1,CHEK2	6/110
11_Member	GO Biological Processes	GO:2000001	regulation of DNA damage checkpoint	-2.26431	-0.557227	580,672,11200	BARD1,BRCA1,CHEK2	3/25
11_Member	Reactome Gene Sets	R-HSA-9701192	Defective homologous recombination repair (HRR) due to BRCA1 loss of function	-2.26431	-0.557227	580,672,10635	BARD1,BRCA1,RAD51AP1	3/25
11_Member	Reactome Gene Sets	R-HSA-9701193	Defective homologous recombination repair (HRR) due to PALB2 loss of function	-2.26431	-0.557227	580,672,10635	BARD1,BRCA1,RAD51AP1	3/25
11_Member	Reactome Gene Sets	R-HSA-9704331	Defective HDR through Homologous Recombination Repair (HRR) due to PALB2 loss of BRCA1 binding function	-2.26431	-0.557227	580,672,10635	BARD1,BRCA1,RAD51AP1	3/25
11_Member	Reactome Gene Sets	R-HSA-9704646	Defective HDR through Homologous Recombination Repair (HRR) due to PALB2 loss of BRCA2/RAD51/RAD51C binding function	-2.26431	-0.557227	580,672,10635	BARD1,BRCA1,RAD51AP1	3/25
11_Member	GO Biological Processes	GO:1902749	regulation of cell cycle G2/M phase transition	-2.23523	-0.532095	580,672,3364,51347,55920,57099	BARD1,BRCA1,HUS1,TAOK3,RCC2,AVEN	6/112
11_Member	GO Biological Processes	GO:0044818	mitotic G2/M transition checkpoint	-2.20134	-0.505998	580,672,3364,51347	BARD1,BRCA1,HUS1,TAOK3	4/51
11_Member	GO Biological Processes	GO:0009411	response to UV	-2.18477	-0.495618	2068,2966,3364,4609,5481,9978,57646	ERCC2,GTF2H2,HUS1,MYC,PPID,RBX1,USP28	7/151
11_Member	GO Biological Processes	GO:0031570	DNA integrity checkpoint signaling	-2.18034	-0.495486	672,3364,5810,11200,51347,57646	BRCA1,HUS1,RAD1,CHEK2,TAOK3,USP28	6/115
11_Member	Reactome Gene Sets	R-HSA-5693554	Resolution of D-loop Structures through Synthesis-Dependent Strand Annealing (SDSA)	-2.16916	-0.492699	580,672,10635	BARD1,BRCA1,RAD51AP1	3/27
11_Member	KEGG Pathway	hsa04218	Cellular senescence	-2.1101	-0.457027	3364,4609,5481,5501,5810,11200,23291	HUS1,MYC,PPID,PPP1CC,RAD1,CHEK2,FBXW11	7/156
11_Member	Canonical Pathways	M258	PID BARD1 PATHWAY	-2.08175	-0.4382	580,672,7323	BARD1,BRCA1,UBE2D3	3/29
11_Member	Reactome Gene Sets	R-HSA-5633007	Regulation of TP53 Activity	-2.0527	-0.417628	580,672,3364,5519,5810,11200,51422	BARD1,BRCA1,HUS1,PPP2R1B,RAD1,CHEK2,PRKAG2	7/160
12_Summary	GO Biological Processes	GO:0045104	intermediate filament cytoskeleton organization	-6.04662	-3.16046	1832,2670,3854,3860,3861,3872,3880,4287,5317,6647,3856,5046,2068,2810,3691,6789,9314,10058,54888,1382,2171,1181,5420,7263,10591,10653,50848,56647,5451,6776	DSP,GFAP,KRT6B,KRT13,KRT14,KRT17,KRT19,ATXN3,PKP1,SOD1,KRT8,PCSK6,ERCC2,SFN,ITGB4,STK4,KLF4,ABCB6,NSUN2,CRABP2,FABP5,CLCN2,PODXL,TST,DNPH1,SPINT2,F11R,BCCIP,POU2F1,STAT5A	30/-
12_Member	GO Biological Processes	GO:0045104	intermediate filament cytoskeleton organization	-6.04662	-3.16046	1832,2670,3854,3860,3861,3872,3880,4287,5317,6647	DSP,GFAP,KRT6B,KRT13,KRT14,KRT17,KRT19,ATXN3,PKP1,SOD1	10/92
12_Member	GO Biological Processes	GO:0045103	intermediate filament-based process	-6.00279	-3.14559	1832,2670,3854,3860,3861,3872,3880,4287,5317,6647	DSP,GFAP,KRT6B,KRT13,KRT14,KRT17,KRT19,ATXN3,PKP1,SOD1	10/93
12_Member	GO Biological Processes	GO:0045109	intermediate filament organization	-4.97708	-2.34453	1832,2670,3854,3860,3861,3872,3880,5317	DSP,GFAP,KRT6B,KRT13,KRT14,KRT17,KRT19,PKP1	8/73
12_Member	Reactome Gene Sets	R-HSA-6809371	Formation of the cornified envelope	-3.92341	-1.62018	1832,3854,3856,3860,3861,3872,3880,5046,5317	DSP,KRT6B,KRT8,KRT13,KRT14,KRT17,KRT19,PCSK6,PKP1	9/130
12_Member	GO Biological Processes	GO:0043588	skin development	-2.62766	-0.789762	1832,2068,2810,3691,3854,3861,3872,6789,9314,10058,54888	DSP,ERCC2,SFN,ITGB4,KRT6B,KRT14,KRT17,STK4,KLF4,ABCB6,NSUN2	11/275
12_Member	GO Biological Processes	GO:0009913	epidermal cell differentiation	-2.59274	-0.774384	1832,2068,2810,3854,3861,3872,6647,6789,9314	DSP,ERCC2,SFN,KRT6B,KRT14,KRT17,SOD1,STK4,KLF4	9/199
12_Member	GO Biological Processes	GO:0008544	epidermis development	-2.48893	-0.705636	1382,1832,2068,2171,2810,3854,3861,3872,6647,6789,9314,54888	CRABP2,DSP,ERCC2,FABP5,SFN,KRT6B,KRT14,KRT17,SOD1,STK4,KLF4,NSUN2	12/329
12_Member	Reactome Gene Sets	R-HSA-6805567	Keratinization	-2.37124	-0.619884	1832,3854,3856,3860,3861,3872,3880,5046,5317	DSP,KRT6B,KRT8,KRT13,KRT14,KRT17,KRT19,PCSK6,PKP1	9/215
12_Member	GO Biological Processes	GO:0030855	epithelial cell differentiation	-2.36289	-0.618694	1181,1832,2068,2810,3854,3860,3861,3872,3880,5420,6647,6789,7263,9314,10591,10653,50848,56647	CLCN2,DSP,ERCC2,SFN,KRT6B,KRT13,KRT14,KRT17,KRT19,PODXL,SOD1,STK4,TST,KLF4,DNPH1,SPINT2,F11R,BCCIP	18/620
12_Member	Canonical Pathways	M115	PID REG GR PATHWAY	-2.17001	-0.492699	2810,3861,3872,5451,6776	SFN,KRT14,KRT17,POU2F1,STAT5A	5/82
13_Summary	GO Biological Processes	GO:0042255	ribosome assembly	-5.51636	-2.74759	3692,6134,26284,51335,54475,55052,84273,130916,3856,3880,11200,23761,27229,56647,126353,6628,55192,79760,79833,83640	EIF6,RPL10,ERAL1,NGRN,NLE1,MRPL20,NOA1,MTERF4,KRT8,KRT19,CHEK2,PISD,TUBGCP4,BCCIP,MISP,SNRPB,DNAJC17,GEMIN7,GEMIN6,RAMAC	20/-
13_Member	GO Biological Processes	GO:0042255	ribosome assembly	-5.51636	-2.74759	3692,6134,26284,51335,54475,55052,84273,130916	EIF6,RPL10,ERAL1,NGRN,NLE1,MRPL20,NOA1,MTERF4	8/62
13_Member	GO Biological Processes	GO:0140694	non-membrane-bounded organelle assembly	-4.0672	-1.69935	3692,3856,3880,6134,11200,23761,26284,27229,51335,54475,55052,56647,84273,126353,130916	EIF6,KRT8,KRT19,RPL10,CHEK2,PISD,ERAL1,TUBGCP4,NGRN,NLE1,MRPL20,BCCIP,NOA1,MISP,MTERF4	15/324
13_Member	GO Biological Processes	GO:0071826	protein-RNA complex organization	-2.5756	-0.761073	3692,6134,6628,26284,54475,55052,55192,79760,79833,83640	EIF6,RPL10,SNRPB,ERAL1,NLE1,MRPL20,DNAJC17,GEMIN7,GEMIN6,RAMAC	10/239
13_Member	GO Biological Processes	GO:0000027	ribosomal large subunit assembly	-2.26431	-0.557227	6134,54475,55052	RPL10,NLE1,MRPL20	3/25
13_Member	GO Biological Processes	GO:0022618	protein-RNA complex assembly	-2.17203	-0.492699	3692,6134,6628,26284,54475,55052,79760,79833,83640	EIF6,RPL10,SNRPB,ERAL1,NLE1,MRPL20,GEMIN7,GEMIN6,RAMAC	9/231
14_Summary	GO Biological Processes	GO:1901292	nucleoside phosphate catabolic process	-5.4038	-2.68871	955,3251,4860,7378,10591,11164,79077,83594,283927,7263,9337,9704,51095,54790,84153,164668,5625,5336,2184,318,1723,51020,2987,6470,93100,2760,342897	ENTPD6,HPRT1,PNP,UPP1,DNPH1,NUDT5,DCTPP1,NUDT12,NUDT7,TST,CNOT8,DHX34,TRNT1,TET2,RNASEH2C,APOBEC3H,PRODH,PLCG2,FAH,NUDT2,DHODH,HDDC2,GUK1,SHMT1,NAPRT,GM2A,NCCRP1	27/-
14_Member	GO Biological Processes	GO:1901292	nucleoside phosphate catabolic process	-5.4038	-2.68871	955,3251,4860,7378,10591,11164,79077,83594,283927	ENTPD6,HPRT1,PNP,UPP1,DNPH1,NUDT5,DCTPP1,NUDT12,NUDT7	9/85
14_Member	GO Biological Processes	GO:0044270	cellular nitrogen compound catabolic process	-4.60321	-2.06084	955,3251,4860,7263,7378,9337,9704,10591,11164,51095,54790,79077,83594,84153,164668,283927	ENTPD6,HPRT1,PNP,TST,UPP1,CNOT8,DHX34,DNPH1,NUDT5,TRNT1,TET2,DCTPP1,NUDT12,RNASEH2C,APOBEC3H,NUDT7	16/326
14_Member	GO Biological Processes	GO:0046700	heterocycle catabolic process	-4.57107	-2.05502	955,3251,4860,5625,7378,9337,9704,10591,11164,51095,54790,79077,83594,84153,164668,283927	ENTPD6,HPRT1,PNP,PRODH,UPP1,CNOT8,DHX34,DNPH1,NUDT5,TRNT1,TET2,DCTPP1,NUDT12,RNASEH2C,APOBEC3H,NUDT7	16/328
14_Member	GO Biological Processes	GO:0046434	organophosphate catabolic process	-4.49339	-2.00216	955,3251,4860,5336,7378,10591,11164,79077,83594,283927	ENTPD6,HPRT1,PNP,PLCG2,UPP1,DNPH1,NUDT5,DCTPP1,NUDT12,NUDT7	10/137
14_Member	GO Biological Processes	GO:1901361	organic cyclic compound catabolic process	-4.40285	-1.94193	955,2184,3251,4860,5625,7378,9337,9704,10591,11164,51095,54790,79077,83594,84153,164668,283927	ENTPD6,FAH,HPRT1,PNP,PRODH,UPP1,CNOT8,DHX34,DNPH1,NUDT5,TRNT1,TET2,DCTPP1,NUDT12,RNASEH2C,APOBEC3H,NUDT7	17/376
14_Member	GO Biological Processes	GO:0019439	aromatic compound catabolic process	-4.3084	-1.88412	955,2184,3251,4860,7378,9337,9704,10591,11164,51095,54790,79077,83594,84153,164668,283927	ENTPD6,FAH,HPRT1,PNP,UPP1,CNOT8,DHX34,DNPH1,NUDT5,TRNT1,TET2,DCTPP1,NUDT12,RNASEH2C,APOBEC3H,NUDT7	16/345
14_Member	GO Biological Processes	GO:0034655	nucleobase-containing compound catabolic process	-4.07279	-1.69935	955,3251,4860,7378,9337,9704,10591,11164,51095,79077,83594,84153,164668,283927	ENTPD6,HPRT1,PNP,UPP1,CNOT8,DHX34,DNPH1,NUDT5,TRNT1,DCTPP1,NUDT12,RNASEH2C,APOBEC3H,NUDT7	14/287
14_Member	GO Biological Processes	GO:0009125	nucleoside monophosphate catabolic process	-3.95064	-1.63271	3251,4860,7378,10591	HPRT1,PNP,UPP1,DNPH1	4/18
14_Member	GO Biological Processes	GO:0009166	nucleotide catabolic process	-3.93498	-1.62782	3251,4860,7378,10591,79077,83594,283927	HPRT1,PNP,UPP1,DNPH1,DCTPP1,NUDT12,NUDT7	7/76
14_Member	Reactome Gene Sets	R-HSA-8956319	Nucleotide catabolism	-3.79474	-1.52897	955,4860,7378,10591,11164	ENTPD6,PNP,UPP1,DNPH1,NUDT5	5/36
14_Member	KEGG Pathway	hsa00240	Pyrimidine metabolism	-3.72441	-1.47276	318,955,1723,7378,51020,79077	NUDT2,ENTPD6,DHODH,UPP1,HDDC2,DCTPP1	6/58
14_Member	GO Biological Processes	GO:0009394	2'-deoxyribonucleotide metabolic process	-3.47217	-1.28797	2987,4860,6470,7378,79077	GUK1,PNP,SHMT1,UPP1,DCTPP1	5/42
14_Member	GO Biological Processes	GO:0009162	deoxyribonucleoside monophosphate metabolic process	-3.43978	-1.26732	4860,6470,7378,10591	PNP,SHMT1,UPP1,DNPH1	4/24
14_Member	GO Biological Processes	GO:0009262	deoxyribonucleotide metabolic process	-3.42362	-1.26276	2987,4860,6470,7378,79077	GUK1,PNP,SHMT1,UPP1,DCTPP1	5/43
14_Member	GO Biological Processes	GO:0019692	deoxyribose phosphate metabolic process	-3.42362	-1.26276	2987,4860,6470,7378,79077	GUK1,PNP,SHMT1,UPP1,DCTPP1	5/43
14_Member	GO Biological Processes	GO:0006195	purine nucleotide catabolic process	-3.03842	-1.03263	3251,4860,10591,83594,283927	HPRT1,PNP,DNPH1,NUDT12,NUDT7	5/52
14_Member	GO Biological Processes	GO:0009158	ribonucleoside monophosphate catabolic process	-3.01383	-1.03263	3251,4860,7378	HPRT1,PNP,UPP1	3/14
14_Member	GO Biological Processes	GO:0009159	deoxyribonucleoside monophosphate catabolic process	-3.01383	-1.03263	4860,7378,10591	PNP,UPP1,DNPH1	3/14
14_Member	GO Biological Processes	GO:0043094	cellular metabolic compound salvage	-3.00297	-1.02732	3251,4860,7378,93100	HPRT1,PNP,UPP1,NAPRT	4/31
14_Member	GO Biological Processes	GO:0009130	pyrimidine nucleoside monophosphate biosynthetic process	-2.92158	-0.9727	1723,6470,7378	DHODH,SHMT1,UPP1	3/15
14_Member	GO Biological Processes	GO:0043101	purine-containing compound salvage	-2.92158	-0.9727	3251,4860,93100	HPRT1,PNP,NAPRT	3/15
14_Member	GO Biological Processes	GO:0009116	nucleoside metabolic process	-2.89164	-0.951321	3251,4860,7378,10591,164668	HPRT1,PNP,UPP1,DNPH1,APOBEC3H	5/56
14_Member	GO Biological Processes	GO:0072527	pyrimidine-containing compound metabolic process	-2.88607	-0.947441	1723,6470,7378,54790,79077,164668	DHODH,SHMT1,UPP1,TET2,DCTPP1,APOBEC3H	6/83
14_Member	GO Biological Processes	GO:0072523	purine-containing compound catabolic process	-2.85688	-0.926602	3251,4860,10591,83594,283927	HPRT1,PNP,DNPH1,NUDT12,NUDT7	5/57
14_Member	GO Biological Processes	GO:0009119	ribonucleoside metabolic process	-2.80154	-0.904769	3251,4860,7378,164668	HPRT1,PNP,UPP1,APOBEC3H	4/35
14_Member	GO Biological Processes	GO:0043173	nucleotide salvage	-2.68187	-0.823709	3251,7378,93100	HPRT1,UPP1,NAPRT	3/18
14_Member	Reactome Gene Sets	R-HSA-74259	Purine catabolism	-2.68187	-0.823709	4860,10591,11164	PNP,DNPH1,NUDT5	3/18
14_Member	GO Biological Processes	GO:0072529	pyrimidine-containing compound catabolic process	-2.66718	-0.817817	7378,54790,79077,164668	UPP1,TET2,DCTPP1,APOBEC3H	4/38
14_Member	GO Biological Processes	GO:0042454	ribonucleoside catabolic process	-2.54596	-0.741348	4860,7378,164668	PNP,UPP1,APOBEC3H	3/20
14_Member	GO Biological Processes	GO:0009129	pyrimidine nucleoside monophosphate metabolic process	-2.48365	-0.705636	1723,6470,7378	DHODH,SHMT1,UPP1	3/21
14_Member	GO Biological Processes	GO:1901136	carbohydrate derivative catabolic process	-2.45002	-0.676704	2760,3251,4860,7378,79077,164668,283927,342897	GM2A,HPRT1,PNP,UPP1,DCTPP1,APOBEC3H,NUDT7,NCCRP1	8/171
14_Member	Reactome Gene Sets	R-HSA-8956321	Nucleotide salvage	-2.36856	-0.619884	3251,4860,7378	HPRT1,PNP,UPP1	3/23
14_Member	GO Biological Processes	GO:0009219	pyrimidine deoxyribonucleotide metabolic process	-2.3152	-0.585735	6470,7378,79077	SHMT1,UPP1,DCTPP1	3/24
14_Member	GO Biological Processes	GO:0009164	nucleoside catabolic process	-2.26431	-0.557227	4860,7378,164668	PNP,UPP1,APOBEC3H	3/25
14_Member	GO Biological Processes	GO:0009261	ribonucleotide catabolic process	-2.26324	-0.557149	3251,4860,7378,283927	HPRT1,PNP,UPP1,NUDT7	4/49
14_Member	GO Biological Processes	GO:1901657	glycosyl compound metabolic process	-2.14808	-0.47594	3251,4860,7378,10591,164668	HPRT1,PNP,UPP1,DNPH1,APOBEC3H	5/83
14_Member	GO Biological Processes	GO:0006220	pyrimidine nucleotide metabolic process	-2.14228	-0.47496	1723,6470,7378,79077	DHODH,SHMT1,UPP1,DCTPP1	4/53
14_Member	GO Biological Processes	GO:0009264	deoxyribonucleotide catabolic process	-2.08175	-0.4382	4860,7378,79077	PNP,UPP1,DCTPP1	3/29
14_Member	GO Biological Processes	GO:0034656	nucleobase-containing small molecule catabolic process	-2.08175	-0.4382	4860,7378,164668	PNP,UPP1,APOBEC3H	3/29
14_Member	GO Biological Processes	GO:0046386	deoxyribose phosphate catabolic process	-2.08175	-0.4382	4860,7378,79077	PNP,UPP1,DCTPP1	3/29
15_Summary	GO Biological Processes	GO:0002097	tRNA wobble base modification	-5.21778	-2.54215	23587,55140,84705,91801,134637	ELP5,ELP3,GTPBP3,ALKBH8,ADAT2	5/-
15_Member	GO Biological Processes	GO:0002097	tRNA wobble base modification	-5.21778	-2.54215	23587,55140,84705,91801,134637	ELP5,ELP3,GTPBP3,ALKBH8,ADAT2	5/19
15_Member	GO Biological Processes	GO:0002098	tRNA wobble uridine modification	-4.16634	-1.77203	23587,55140,84705,91801	ELP5,ELP3,GTPBP3,ALKBH8	4/16
16_Summary	WikiPathways	WP1601	Fluoropyrimidine activity	-5.07602	-2.43503	2068,2356,5471,7378,8836,10257,6470,249	ERCC2,FPGS,PPAT,UPP1,GGH,ABCC4,SHMT1,ALPL	8/-
16_Member	WikiPathways	WP1601	Fluoropyrimidine activity	-5.07602	-2.43503	2068,2356,5471,7378,8836,10257	ERCC2,FPGS,PPAT,UPP1,GGH,ABCC4	6/34
16_Member	KEGG Pathway	hsa01523	Antifolate resistance	-3.05803	-1.04191	2356,6470,8836,10257	FPGS,SHMT1,GGH,ABCC4	4/30
16_Member	KEGG Pathway	hsa00790	Folate biosynthesis	-2.21569	-0.517596	249,2356,8836	ALPL,FPGS,GGH	3/26
17_Summary	GO Biological Processes	GO:0007005	mitochondrion organization	-4.9535	-2.32922	1525,1678,2810,23277,23761,25793,29090,54968,55102,55187,56652,79017,80179,84273,84883,130916,134266,154791,401505,440574,79751,253512	CXADR,TIMM8A,SFN,CLUH,PISD,FBXO7,TIMM21,TMEM70,ATG2B,VPS13D,TWNK,GGCT,MYO19,NOA1,AIFM2,MTERF4,GRPEL2,FMC1,TOMM5,MICOS10,SLC25A22,SLC25A30	22/-
17_Member	GO Biological Processes	GO:0007005	mitochondrion organization	-4.9535	-2.32922	1525,1678,2810,23277,23761,25793,29090,54968,55102,55187,56652,79017,80179,84273,84883,130916,134266,154791,401505,440574	CXADR,TIMM8A,SFN,CLUH,PISD,FBXO7,TIMM21,TMEM70,ATG2B,VPS13D,TWNK,GGCT,MYO19,NOA1,AIFM2,MTERF4,GRPEL2,FMC1,TOMM5,MICOS10	20/451
17_Member	GO Biological Processes	GO:0006626	protein targeting to mitochondrion	-3.56398	-1.34896	1678,25793,29090,130916,134266,401505	TIMM8A,FBXO7,TIMM21,MTERF4,GRPEL2,TOMM5	6/62
17_Member	GO Biological Processes	GO:0072655	establishment of protein localization to mitochondrion	-3.08656	-1.05606	1678,25793,29090,130916,134266,401505	TIMM8A,FBXO7,TIMM21,MTERF4,GRPEL2,TOMM5	6/76
17_Member	GO Biological Processes	GO:0070585	protein localization to mitochondrion	-2.80638	-0.906525	1678,25793,29090,130916,134266,401505	TIMM8A,FBXO7,TIMM21,MTERF4,GRPEL2,TOMM5	6/86
17_Member	GO Biological Processes	GO:0006839	mitochondrial transport	-2.59361	-0.774384	1678,25793,29090,79751,130916,134266,253512,401505	TIMM8A,FBXO7,TIMM21,SLC25A22,MTERF4,GRPEL2,SLC25A30,TOMM5	8/162
18_Summary	GO Biological Processes	GO:0006790	sulfur compound metabolic process	-4.90524	-2.28908	1491,1634,4548,4552,6776,7263,10539,10654,11019,27158,64428,84836,166012,283927,552900,641371,2068	CTH,DCN,MTR,MTRR,STAT5A,TST,GLRX3,PMVK,LIAS,NDOR1,CIAO3,ABHD14B,CHST13,NUDT7,BOLA2,ACOT1,ERCC2	17/-
18_Member	GO Biological Processes	GO:0006790	sulfur compound metabolic process	-4.90524	-2.28908	1491,1634,4548,4552,6776,7263,10539,10654,11019,27158,64428,84836,166012,283927,552900,641371	CTH,DCN,MTR,MTRR,STAT5A,TST,GLRX3,PMVK,LIAS,NDOR1,CIAO3,ABHD14B,CHST13,NUDT7,BOLA2,ACOT1	16/308
18_Member	Reactome Gene Sets	R-HSA-2564830	Cytosolic iron-sulfur cluster assembly	-3.1139	-1.08131	2068,27158,64428	ERCC2,NDOR1,CIAO3	3/13
18_Member	GO Biological Processes	GO:0016226	iron-sulfur cluster assembly	-3.05803	-1.04191	10539,27158,64428,552900	GLRX3,NDOR1,CIAO3,BOLA2	4/30
18_Member	GO Biological Processes	GO:0031163	metallo-sulfur cluster assembly	-3.05803	-1.04191	10539,27158,64428,552900	GLRX3,NDOR1,CIAO3,BOLA2	4/30
19_Summary	GO Biological Processes	GO:0009132	nucleoside diphosphate metabolic process	-4.85423	-2.26155	205,955,1723,2987,11164,283927,79077	AK4,ENTPD6,DHODH,GUK1,NUDT5,NUDT7,DCTPP1	7/-
19_Member	GO Biological Processes	GO:0009132	nucleoside diphosphate metabolic process	-4.85423	-2.26155	205,955,1723,2987,11164,283927	AK4,ENTPD6,DHODH,GUK1,NUDT5,NUDT7	6/37
19_Member	GO Biological Processes	GO:0009133	nucleoside diphosphate biosynthetic process	-3.1139	-1.08131	205,1723,2987	AK4,DHODH,GUK1	3/13
19_Member	GO Biological Processes	GO:0009185	ribonucleoside diphosphate metabolic process	-3.05803	-1.04191	205,1723,2987,11164	AK4,DHODH,GUK1,NUDT5	4/30
19_Member	Reactome Gene Sets	R-HSA-499943	Interconversion of nucleotide di- and triphosphates	-2.0406	-0.414679	205,2987,79077	AK4,GUK1,DCTPP1	3/30
20_Summary	KEGG Pathway	hsa00260	Glycine, serine and threonine metabolism	-4.65236	-2.08195	1491,2593,2628,5723,6470,23464,5214,5372,9314,54836,55818	CTH,GAMT,GATM,PSPH,SHMT1,GCAT,PFKP,PMM1,KLF4,BSPRY,KDM3A	11/-
20_Member	KEGG Pathway	hsa00260	Glycine, serine and threonine metabolism	-4.65236	-2.08195	1491,2593,2628,5723,6470,23464	CTH,GAMT,GATM,PSPH,SHMT1,GCAT	6/40
20_Member	GO Biological Processes	GO:1990830	cellular response to leukemia inhibitory factor	-3.14745	-1.08131	1491,5214,5372,6470,9314,54836,55818	CTH,PFKP,PMM1,SHMT1,KLF4,BSPRY,KDM3A	7/102
20_Member	GO Biological Processes	GO:1990823	response to leukemia inhibitory factor	-3.12222	-1.08131	1491,5214,5372,6470,9314,54836,55818	CTH,PFKP,PMM1,SHMT1,KLF4,BSPRY,KDM3A	7/103
20_Member	GO Biological Processes	GO:0009070	serine family amino acid biosynthetic process	-2.48365	-0.705636	1491,5723,6470	CTH,PSPH,SHMT1	3/21

## Sheet: WT_D3_D0_DOWN
GroupID	Category	Term	Description	LogP	Log(q-value)	Genes	Symbols	InTerm_InList
1_Summary	Reactome Gene Sets	R-HSA-1474244	Extracellular matrix organization	-42.3624	-38.0139	2,649,960,1277,1278,1280,1282,1287,1289,1290,1295,1301,1302,1303,1307,2199,2202,2335,3371,3678,3688,3694,3913,4015,4017,4053,4323,4684,5045,5054,5118,5654,6383,6678,6696,7043,7057,7077,7092,7412,11117,22801,30008,84034,84171,84695,283208,857,858,1490,3491,4629,7982,10211,10609,23768,26585,57326,83716,1464,5328,7058,1435,3667,4240,558,2152,2260,4067,4665,5764,8829,10253,10818,30011,57498,7791,1039…	A2M,BMP1,CD44,COL1A1,COL1A2,COL2A1,COL4A1,COL4A5,COL5A1,COL5A2,COL8A1,COL11A1,COL11A2,COL12A1,COL16A1,FBLN2,EFEMP1,FN1,TNC,ITGA5,ITGB1,ITGB6,LAMB2,LOX,LOXL2,LTBP2,MMP14,NCAM1,FURIN,SERPINE1,PCOLCE,HTRA1,SDC2,SPARC,SPP1,TGFB3,THBS1,TIMP2,TLL1,VCAM1,EMILIN1,ITGA11,EFEMP2,EMILIN2,LOXL4,LOXL3,P4HA3,CAV1,CAV2,CCN2,CCN1,MYH11,ST7,FLOT1,P3H4,FLRT2,GREM1,PBXIP1,CRISPLD2,CSPG4,PLAU,THBS2,CSF1,IRS1,MFGE8,A…	87/-
1_Member	Reactome Gene Sets	R-HSA-1474244	Extracellular matrix organization	-42.3624	-38.0139	2,649,960,1277,1278,1280,1282,1287,1289,1290,1295,1301,1302,1303,1307,2199,2202,2335,3371,3678,3688,3694,3913,4015,4017,4053,4323,4684,5045,5054,5118,5654,6383,6678,6696,7043,7057,7077,7092,7412,11117,22801,30008,84034,84171,84695,283208	A2M,BMP1,CD44,COL1A1,COL1A2,COL2A1,COL4A1,COL4A5,COL5A1,COL5A2,COL8A1,COL11A1,COL11A2,COL12A1,COL16A1,FBLN2,EFEMP1,FN1,TNC,ITGA5,ITGB1,ITGB6,LAMB2,LOX,LOXL2,LTBP2,MMP14,NCAM1,FURIN,SERPINE1,PCOLCE,HTRA1,SDC2,SPARC,SPP1,TGFB3,THBS1,TIMP2,TLL1,VCAM1,EMILIN1,ITGA11,EFEMP2,EMILIN2,LOXL4,LOXL3,P4HA3	47/300
1_Member	GO Biological Processes	GO:0030198	extracellular matrix organization	-29.6737	-25.8512	649,857,858,1277,1278,1280,1282,1287,1289,1290,1295,1301,1302,1303,1307,1490,3491,3688,3913,4015,4017,4323,4629,5045,7092,7982,10211,10609,11117,23768,26585,30008,57326,83716,84171,84695	BMP1,CAV1,CAV2,COL1A1,COL1A2,COL2A1,COL4A1,COL4A5,COL5A1,COL5A2,COL8A1,COL11A1,COL11A2,COL12A1,COL16A1,CCN2,CCN1,ITGB1,LAMB2,LOX,LOXL2,MMP14,MYH11,FURIN,TLL1,ST7,FLOT1,P3H4,EMILIN1,FLRT2,GREM1,EFEMP2,PBXIP1,CRISPLD2,LOXL4,LOXL3	36/272
1_Member	GO Biological Processes	GO:0043062	extracellular structure organization	-29.6158	-25.8512	649,857,858,1277,1278,1280,1282,1287,1289,1290,1295,1301,1302,1303,1307,1490,3491,3688,3913,4015,4017,4323,4629,5045,7092,7982,10211,10609,11117,23768,26585,30008,57326,83716,84171,84695	BMP1,CAV1,CAV2,COL1A1,COL1A2,COL2A1,COL4A1,COL4A5,COL5A1,COL5A2,COL8A1,COL11A1,COL11A2,COL12A1,COL16A1,CCN2,CCN1,ITGB1,LAMB2,LOX,LOXL2,MMP14,MYH11,FURIN,TLL1,ST7,FLOT1,P3H4,EMILIN1,FLRT2,GREM1,EFEMP2,PBXIP1,CRISPLD2,LOXL4,LOXL3	36/273
1_Member	GO Biological Processes	GO:0045229	external encapsulating structure organization	-29.5008	-25.8512	649,857,858,1277,1278,1280,1282,1287,1289,1290,1295,1301,1302,1303,1307,1490,3491,3688,3913,4015,4017,4323,4629,5045,7092,7982,10211,10609,11117,23768,26585,30008,57326,83716,84171,84695	BMP1,CAV1,CAV2,COL1A1,COL1A2,COL2A1,COL4A1,COL4A5,COL5A1,COL5A2,COL8A1,COL11A1,COL11A2,COL12A1,COL16A1,CCN2,CCN1,ITGB1,LAMB2,LOX,LOXL2,MMP14,MYH11,FURIN,TLL1,ST7,FLOT1,P3H4,EMILIN1,FLRT2,GREM1,EFEMP2,PBXIP1,CRISPLD2,LOXL4,LOXL3	36/275
1_Member	Canonical Pathways	M18	PID INTEGRIN1 PATHWAY	-26.0481	-22.5446	1277,1278,1280,1282,1287,1289,1290,1301,1302,1464,2335,3371,3678,3688,3913,5328,6696,7057,7058,7412,22801	COL1A1,COL1A2,COL2A1,COL4A1,COL4A5,COL5A1,COL5A2,COL11A1,COL11A2,CSPG4,FN1,TNC,ITGA5,ITGB1,LAMB2,PLAU,SPP1,THBS1,THBS2,VCAM1,ITGA11	21/66
1_Member	Reactome Gene Sets	R-HSA-2022090	Assembly of collagen fibrils and other multimeric structures	-21.7115	-18.3172	649,1277,1278,1280,1282,1287,1289,1290,1295,1301,1302,1303,4015,4017,5118,7092,84171,84695	BMP1,COL1A1,COL1A2,COL2A1,COL4A1,COL4A5,COL5A1,COL5A2,COL8A1,COL11A1,COL11A2,COL12A1,LOX,LOXL2,PCOLCE,TLL1,LOXL4,LOXL3	18/61
1_Member	Reactome Gene Sets	R-HSA-1474290	Collagen formation	-21.3266	-17.9781	649,1277,1278,1280,1282,1287,1289,1290,1295,1301,1302,1303,1307,4015,4017,5118,7092,84171,84695,283208	BMP1,COL1A1,COL1A2,COL2A1,COL4A1,COL4A5,COL5A1,COL5A2,COL8A1,COL11A1,COL11A2,COL12A1,COL16A1,LOX,LOXL2,PCOLCE,TLL1,LOXL4,LOXL3,P4HA3	20/90
1_Member	Reactome Gene Sets	R-HSA-216083	Integrin cell surface interactions	-20.337	-17.0676	960,1277,1278,1280,1282,1287,1289,1290,1295,1307,2335,3371,3678,3688,3694,6696,7057,7412,22801	CD44,COL1A1,COL1A2,COL2A1,COL4A1,COL4A5,COL5A1,COL5A2,COL8A1,COL16A1,FN1,TNC,ITGA5,ITGB1,ITGB6,SPP1,THBS1,VCAM1,ITGA11	19/85
1_Member	Reactome Gene Sets	R-HSA-1474228	Degradation of the extracellular matrix	-19.9133	-16.7109	2,649,960,1277,1278,1280,1282,1287,1289,1290,1295,1301,1302,1303,1307,2335,4323,5045,5654,6696,7077,7092	A2M,BMP1,CD44,COL1A1,COL1A2,COL2A1,COL4A1,COL4A5,COL5A1,COL5A2,COL8A1,COL11A1,COL11A2,COL12A1,COL16A1,FN1,MMP14,FURIN,HTRA1,SPP1,TIMP2,TLL1	22/140
1_Member	GO Biological Processes	GO:0030199	collagen fibril organization	-18.8234	-15.7053	649,1277,1278,1280,1289,1290,1301,1302,1303,4015,4017,7092,10609,26585,84171,84695	BMP1,COL1A1,COL1A2,COL2A1,COL5A1,COL5A2,COL11A1,COL11A2,COL12A1,LOX,LOXL2,TLL1,P3H4,GREM1,LOXL4,LOXL3	16/58
1_Member	Canonical Pathways	M160	PID AVB3 INTEGRIN PATHWAY	-18.4695	-15.3997	1277,1278,1280,1282,1287,1289,1290,1295,1301,1302,1303,1307,1435,2335,3667,4240,6696	COL1A1,COL1A2,COL2A1,COL4A1,COL4A5,COL5A1,COL5A2,COL8A1,COL11A1,COL11A2,COL12A1,COL16A1,CSF1,FN1,IRS1,MFGE8,SPP1	17/74
1_Member	Reactome Gene Sets	R-HSA-1650814	Collagen biosynthesis and modifying enzymes	-17.7086	-14.7455	649,1277,1278,1280,1282,1287,1289,1290,1295,1301,1302,1303,1307,5118,7092,283208	BMP1,COL1A1,COL1A2,COL2A1,COL4A1,COL4A5,COL5A1,COL5A2,COL8A1,COL11A1,COL11A2,COL12A1,COL16A1,PCOLCE,TLL1,P4HA3	16/67
1_Member	Reactome Gene Sets	R-HSA-3000171	Non-integrin membrane-ECM interactions	-17.0851	-14.1875	1277,1278,1280,1282,1287,1289,1290,1301,1302,2335,3371,3688,3913,6383,7057	COL1A1,COL1A2,COL2A1,COL4A1,COL4A5,COL5A1,COL5A2,COL11A1,COL11A2,FN1,TNC,ITGB1,LAMB2,SDC2,THBS1	15/59
1_Member	Reactome Gene Sets	R-HSA-3000178	ECM proteoglycans	-16.7576	-13.8862	1277,1278,1280,1282,1287,1289,1290,2335,3371,3688,3694,3913,4684,5054,6678,7043	COL1A1,COL1A2,COL2A1,COL4A1,COL4A5,COL5A1,COL5A2,FN1,TNC,ITGB1,ITGB6,LAMB2,NCAM1,SERPINE1,SPARC,TGFB3	16/76
1_Member	KEGG Pathway	hsa04512	ECM-receptor interaction	-15.6756	-12.8435	960,1277,1278,1280,1282,1287,2335,3371,3678,3688,3694,3913,6696,7057,7058,22801	CD44,COL1A1,COL1A2,COL2A1,COL4A1,COL4A5,FN1,TNC,ITGA5,ITGB1,ITGB6,LAMB2,SPP1,THBS1,THBS2,ITGA11	16/88
1_Member	Reactome Gene Sets	R-HSA-9006934	Signaling by Receptor Tyrosine Kinases	-15.2552	-12.4382	558,857,1277,1278,1280,1282,1287,1289,1290,1301,1302,2152,2260,2335,3667,3688,3913,4067,4665,5045,5764,6678,6696,7057,7058,8829,10253,10818,23768,30011,57498	AXL,CAV1,COL1A1,COL1A2,COL2A1,COL4A1,COL4A5,COL5A1,COL5A2,COL11A1,COL11A2,F3,FGFR1,FN1,IRS1,ITGB1,LAMB2,LYN,NAB2,FURIN,PTN,SPARC,SPP1,THBS1,THBS2,NRP1,SPRY2,FRS2,FLRT2,SH3KBP1,KIDINS220	31/524
1_Member	Reactome Gene Sets	R-HSA-1442490	Collagen degradation	-14.9821	-12.1776	1277,1278,1280,1282,1287,1289,1290,1295,1301,1302,1303,1307,4323,5045	COL1A1,COL1A2,COL2A1,COL4A1,COL4A5,COL5A1,COL5A2,COL8A1,COL11A1,COL11A2,COL12A1,COL16A1,MMP14,FURIN	14/64
1_Member	WikiPathways	WP306	Focal adhesion	-14.3134	-11.5211	857,858,1277,1278,1280,1282,1290,2335,3371,3678,3688,3694,3913,6696,7057,7058,7791,10398,22801,103910	CAV1,CAV2,COL1A1,COL1A2,COL2A1,COL4A1,COL5A2,FN1,TNC,ITGA5,ITGB1,ITGB6,LAMB2,SPP1,THBS1,THBS2,ZYX,MYL9,ITGA11,MYL12B	20/198
1_Member	Canonical Pathways	M3005	NABA COLLAGENS	-14.1846	-11.4158	1277,1278,1280,1282,1287,1289,1290,1295,1301,1302,1303,1307	COL1A1,COL1A2,COL2A1,COL4A1,COL4A5,COL5A1,COL5A2,COL8A1,COL11A1,COL11A2,COL12A1,COL16A1	12/44
1_Member	Reactome Gene Sets	R-HSA-8948216	Collagen chain trimerization	-14.1846	-11.4158	1277,1278,1280,1282,1287,1289,1290,1295,1301,1302,1303,1307	COL1A1,COL1A2,COL2A1,COL4A1,COL4A5,COL5A1,COL5A2,COL8A1,COL11A1,COL11A2,COL12A1,COL16A1	12/44
1_Member	KEGG Pathway	hsa04510	Focal adhesion	-14.1041	-11.3466	857,858,1277,1278,1280,1282,1287,2335,3371,3678,3688,3694,3913,6696,7057,7058,7791,10398,22801,103910	CAV1,CAV2,COL1A1,COL1A2,COL2A1,COL4A1,COL4A5,FN1,TNC,ITGA5,ITGB1,ITGB6,LAMB2,SPP1,THBS1,THBS2,ZYX,MYL9,ITGA11,MYL12B	20/203
1_Member	Canonical Pathways	M198	PID SYNDECAN 1 PATHWAY	-13.9259	-11.1846	1277,1278,1280,1282,1287,1289,1290,1295,1301,1302,1303,1307	COL1A1,COL1A2,COL2A1,COL4A1,COL4A5,COL5A1,COL5A2,COL8A1,COL11A1,COL11A2,COL12A1,COL16A1	12/46
1_Member	Reactome Gene Sets	R-HSA-8874081	MET activates PTK2 signaling	-12.9058	-10.22	1277,1278,1280,1289,1290,1301,1302,2335,3688,3913	COL1A1,COL1A2,COL2A1,COL5A1,COL5A2,COL11A1,COL11A2,FN1,ITGB1,LAMB2	10/30
1_Member	WikiPathways	WP3932	Focal adhesion: PI3K-Akt-mTOR-signaling pathway	-12.744	-10.0675	1277,1278,1280,1282,1289,1290,1301,1302,1435,2149,2260,2335,3371,3667,3678,3688,3694,3913,6696,7057,7058,22801	COL1A1,COL1A2,COL2A1,COL4A1,COL5A1,COL5A2,COL11A1,COL11A2,CSF1,F2R,FGFR1,FN1,TNC,IRS1,ITGA5,ITGB1,ITGB6,LAMB2,SPP1,THBS1,THBS2,ITGA11	22/302
1_Member	WikiPathways	WP2911	miRNA targets in ECM and membrane receptors	-12.7073	-10.0489	1278,1282,1289,1290,2335,3694,3913,6383,7057,7058,22801	COL1A2,COL4A1,COL5A1,COL5A2,FN1,ITGB6,LAMB2,SDC2,THBS1,THBS2,ITGA11	11/43
1_Member	Reactome Gene Sets	R-HSA-3000170	Syndecan interactions	-11.667	-9.08184	1277,1278,1289,1290,2335,3371,3688,6383,7057	COL1A1,COL1A2,COL5A1,COL5A2,FN1,TNC,ITGB1,SDC2,THBS1	9/27
1_Member	Reactome Gene Sets	R-HSA-8875878	MET promotes cell motility	-11.3737	-8.81044	1277,1278,1280,1289,1290,1301,1302,2335,3688,3913	COL1A1,COL1A2,COL2A1,COL5A1,COL5A2,COL11A1,COL11A2,FN1,ITGB1,LAMB2	10/41
1_Member	KEGG Pathway	hsa04974	Protein digestion and absorption	-10.734	-8.22432	481,1277,1278,1280,1282,1287,1289,1290,1295,1301,1302,1303,1307	ATP1B1,COL1A1,COL1A2,COL2A1,COL4A1,COL4A5,COL5A1,COL5A2,COL8A1,COL11A1,COL11A2,COL12A1,COL16A1	13/103
1_Member	WikiPathways	WP4172	PI3K-Akt signaling pathway	-9.97648	-7.52002	598,1277,1278,1280,1282,1287,1435,2149,2260,2335,3371,3667,3678,3688,3694,3913,6696,7057,7058,22801	BCL2L1,COL1A1,COL1A2,COL2A1,COL4A1,COL4A5,CSF1,F2R,FGFR1,FN1,TNC,IRS1,ITGA5,ITGB1,ITGB6,LAMB2,SPP1,THBS1,THBS2,ITGA11	20/339
1_Member	KEGG Pathway	hsa04151	PI3K-Akt signaling pathway	-9.6447	-7.2377	598,1277,1278,1280,1282,1287,1435,2149,2260,2335,3371,3667,3678,3688,3694,3913,6696,7057,7058,22801	BCL2L1,COL1A1,COL1A2,COL2A1,COL4A1,COL4A5,CSF1,F2R,FGFR1,FN1,TNC,IRS1,ITGA5,ITGB1,ITGB6,LAMB2,SPP1,THBS1,THBS2,ITGA11	20/354
1_Member	Reactome Gene Sets	R-HSA-6806834	Signaling by MET	-9.64177	-7.2377	1277,1278,1280,1289,1290,1301,1302,2335,3688,3913,30011	COL1A1,COL1A2,COL2A1,COL5A1,COL5A2,COL11A1,COL11A2,FN1,ITGB1,LAMB2,SH3KBP1	11/79
1_Member	KEGG Pathway	hsa05165	Human papillomavirus infection	-9.30462	-6.94729	1277,1278,1280,1282,1287,1741,2335,2535,3371,3678,3688,3694,3913,5743,6696,7057,7058,22801,84552	COL1A1,COL1A2,COL2A1,COL4A1,COL4A5,DLG3,FN1,FZD2,TNC,ITGA5,ITGB1,ITGB6,LAMB2,PTGS2,SPP1,THBS1,THBS2,ITGA11,PARD6G	19/331
1_Member	Reactome Gene Sets	R-HSA-186797	Signaling by PDGF	-8.42181	-6.13395	1280,1282,1287,1289,1290,5045,6696,7057,7058	COL2A1,COL4A1,COL4A5,COL5A1,COL5A2,FURIN,SPP1,THBS1,THBS2	9/58
1_Member	Reactome Gene Sets	R-HSA-419037	NCAM1 interactions	-6.89374	-4.78683	1280,1282,1287,1289,1290,4684,5621	COL2A1,COL4A1,COL4A5,COL5A1,COL5A2,NCAM1,PRNP	7/42
1_Member	Reactome Gene Sets	R-HSA-375165	NCAM signaling for neurite out-growth	-6.84426	-4.74855	1280,1282,1287,1289,1290,2260,4684,5621	COL2A1,COL4A1,COL4A5,COL5A1,COL5A2,FGFR1,NCAM1,PRNP	8/63
2_Summary	Canonical Pathways	M5884	NABA CORE MATRISOME	-29.5008	-25.8512	1277,1278,1280,1282,1287,1289,1290,1295,1301,1302,1303,1307,1490,1893,2199,2202,2335,3371,3490,3491,3913,4053,4240,5118,6586,6678,6696,7057,7058,8840,9353,11117,30008,51232,83716,84034	COL1A1,COL1A2,COL2A1,COL4A1,COL4A5,COL5A1,COL5A2,COL8A1,COL11A1,COL11A2,COL12A1,COL16A1,CCN2,ECM1,FBLN2,EFEMP1,FN1,TNC,IGFBP7,CCN1,LAMB2,LTBP2,MFGE8,PCOLCE,SLIT3,SPARC,SPP1,THBS1,THBS2,CCN4,SLIT2,EMILIN1,EFEMP2,CRIM1,CRISPLD2,EMILIN2	36/-
2_Member	Canonical Pathways	M5884	NABA CORE MATRISOME	-29.5008	-25.8512	1277,1278,1280,1282,1287,1289,1290,1295,1301,1302,1303,1307,1490,1893,2199,2202,2335,3371,3490,3491,3913,4053,4240,5118,6586,6678,6696,7057,7058,8840,9353,11117,30008,51232,83716,84034	COL1A1,COL1A2,COL2A1,COL4A1,COL4A5,COL5A1,COL5A2,COL8A1,COL11A1,COL11A2,COL12A1,COL16A1,CCN2,ECM1,FBLN2,EFEMP1,FN1,TNC,IGFBP7,CCN1,LAMB2,LTBP2,MFGE8,PCOLCE,SLIT3,SPARC,SPP1,THBS1,THBS2,CCN4,SLIT2,EMILIN1,EFEMP2,CRIM1,CRISPLD2,EMILIN2	36/275
2_Member	Canonical Pathways	M3008	NABA ECM GLYCOPROTEINS	-19.0511	-15.8786	1490,1893,2199,2202,2335,3371,3490,3491,3913,4053,4240,5118,6586,6678,6696,7057,7058,8840,9353,11117,30008,51232,83716,84034	CCN2,ECM1,FBLN2,EFEMP1,FN1,TNC,IGFBP7,CCN1,LAMB2,LTBP2,MFGE8,PCOLCE,SLIT3,SPARC,SPP1,THBS1,THBS2,CCN4,SLIT2,EMILIN1,EFEMP2,CRIM1,CRISPLD2,EMILIN2	24/196
3_Summary	GO Biological Processes	GO:0097435	supramolecular fiber organization	-27.337	-23.7666	58,649,800,1264,1265,1266,1277,1278,1280,1289,1290,1301,1302,1303,1465,1674,2195,3688,3868,4015,4017,4053,4082,4629,5045,7092,7126,7168,7169,7791,9645,10398,10580,10609,11117,25802,26585,30008,30011,51474,57477,79729,84171,84695,342184,5341,5592,6444,6525,9294,10395,10630,23022,23433,30846,57381,85360	ACTA1,BMP1,CALD1,CNN1,CNN2,CNN3,COL1A1,COL1A2,COL2A1,COL5A1,COL5A2,COL11A1,COL11A2,COL12A1,CSRP1,DES,FAT1,ITGB1,KRT16,LOX,LOXL2,LTBP2,MARCKS,MYH11,FURIN,TLL1,TNFAIP1,TPM1,TPM2,ZYX,MICAL2,MYL9,SORBS1,P3H4,EMILIN1,LMOD1,GREM1,EFEMP2,SH3KBP1,LIMA1,SHROOM4,SH3D21,LOXL4,LOXL3,FMN1,PLEK,PRKG1,SGCD,SMTN,S1PR2,DLC1,PDPN,PALLD,RHOQ,EHD2,RHOJ,SYDE1	57/-
3_Member	GO Biological Processes	GO:0097435	supramolecular fiber organization	-27.337	-23.7666	58,649,800,1264,1265,1266,1277,1278,1280,1289,1290,1301,1302,1303,1465,1674,2195,3688,3868,4015,4017,4053,4082,4629,5045,7092,7126,7168,7169,7791,9645,10398,10580,10609,11117,25802,26585,30008,30011,51474,57477,79729,84171,84695,342184	ACTA1,BMP1,CALD1,CNN1,CNN2,CNN3,COL1A1,COL1A2,COL2A1,COL5A1,COL5A2,COL11A1,COL11A2,COL12A1,CSRP1,DES,FAT1,ITGB1,KRT16,LOX,LOXL2,LTBP2,MARCKS,MYH11,FURIN,TLL1,TNFAIP1,TPM1,TPM2,ZYX,MICAL2,MYL9,SORBS1,P3H4,EMILIN1,LMOD1,GREM1,EFEMP2,SH3KBP1,LIMA1,SHROOM4,SH3D21,LOXL4,LOXL3,FMN1	45/569
3_Member	GO Biological Processes	GO:0030029	actin filament-based process	-17.0736	-14.1875	58,800,1264,1265,1266,1465,2195,3688,4082,4629,5341,5592,6444,6525,7126,7168,7169,7791,9294,9645,10395,10398,10580,10630,23022,23433,25802,30011,30846,51474,57381,57477,79729,85360,342184	ACTA1,CALD1,CNN1,CNN2,CNN3,CSRP1,FAT1,ITGB1,MARCKS,MYH11,PLEK,PRKG1,SGCD,SMTN,TNFAIP1,TPM1,TPM2,ZYX,S1PR2,MICAL2,DLC1,MYL9,SORBS1,PDPN,PALLD,RHOQ,LMOD1,SH3KBP1,EHD2,LIMA1,RHOJ,SHROOM4,SH3D21,SYDE1,FMN1	35/597
3_Member	GO Biological Processes	GO:0030036	actin cytoskeleton organization	-16.7343	-13.8771	58,800,1264,1265,1266,1465,2195,3688,4082,4629,5341,5592,6525,7126,7168,7169,7791,9294,9645,10395,10398,10580,23022,23433,25802,30011,30846,51474,57381,57477,79729,85360,342184	ACTA1,CALD1,CNN1,CNN2,CNN3,CSRP1,FAT1,ITGB1,MARCKS,MYH11,PLEK,PRKG1,SMTN,TNFAIP1,TPM1,TPM2,ZYX,S1PR2,MICAL2,DLC1,MYL9,SORBS1,PALLD,RHOQ,LMOD1,SH3KBP1,EHD2,LIMA1,RHOJ,SHROOM4,SH3D21,SYDE1,FMN1	33/536
3_Member	GO Biological Processes	GO:0007015	actin filament organization	-11.0713	-8.52207	58,800,1264,1265,1266,2195,4082,7126,7168,7169,7791,9645,10580,25802,30011,51474,57477,79729,342184	ACTA1,CALD1,CNN1,CNN2,CNN3,FAT1,MARCKS,TNFAIP1,TPM1,TPM2,ZYX,MICAL2,SORBS1,LMOD1,SH3KBP1,LIMA1,SHROOM4,SH3D21,FMN1	19/261
4_Summary	GO Biological Processes	GO:0001944	vasculature development	-22.3424	-18.8969	90,800,857,1277,1278,1282,1289,1295,1464,1490,1893,2049,2335,3162,3491,3678,3688,4015,4017,4162,4240,4323,5054,5743,6443,6444,7026,7057,7070,7127,7763,8613,8829,9353,10630,26585,30008,57381,219699,1435,2535,9645,10253,10395,342184,1601,2149,2152,2260,4067,5328,5764,6678,8840,10457,58515,85360,131578,152007,646960	ACVR1,CALD1,CAV1,COL1A1,COL1A2,COL4A1,COL5A1,COL8A1,CSPG4,CCN2,ECM1,EPHB3,FN1,HMOX1,CCN1,ITGA5,ITGB1,LOX,LOXL2,MCAM,MFGE8,MMP14,SERPINE1,PTGS2,SGCB,SGCD,NR2F2,THBS1,THY1,TNFAIP2,ZFAND5,PLPP3,NRP1,SLIT2,PDPN,GREM1,EFEMP2,RHOJ,UNC5B,CSF1,FZD2,MICAL2,SPRY2,DLC1,FMN1,DAB2,F2R,F3,FGFR1,LYN,PLAU,PTN,SPARC,CCN4,GPNMB,SELENOK,SYDE1,LRRC15,GLIPR2,PRSS56	60/-
4_Member	GO Biological Processes	GO:0001944	vasculature development	-22.3424	-18.8969	90,800,857,1277,1278,1282,1289,1295,1464,1490,1893,2049,2335,3162,3491,3678,3688,4015,4017,4162,4240,4323,5054,5743,6443,6444,7026,7057,7070,7127,7763,8613,8829,9353,10630,26585,30008,57381,219699	ACVR1,CALD1,CAV1,COL1A1,COL1A2,COL4A1,COL5A1,COL8A1,CSPG4,CCN2,ECM1,EPHB3,FN1,HMOX1,CCN1,ITGA5,ITGB1,LOX,LOXL2,MCAM,MFGE8,MMP14,SERPINE1,PTGS2,SGCB,SGCD,NR2F2,THBS1,THY1,TNFAIP2,ZFAND5,PLPP3,NRP1,SLIT2,PDPN,GREM1,EFEMP2,RHOJ,UNC5B	39/536
4_Member	GO Biological Processes	GO:0001568	blood vessel development	-19.9898	-16.7552	90,800,857,1277,1278,1282,1289,1295,1464,1490,1893,2049,2335,3162,3491,3678,3688,4015,4017,4162,4240,4323,5054,5743,6444,7026,7057,7070,7127,8613,8829,9353,26585,30008,57381,219699	ACVR1,CALD1,CAV1,COL1A1,COL1A2,COL4A1,COL5A1,COL8A1,CSPG4,CCN2,ECM1,EPHB3,FN1,HMOX1,CCN1,ITGA5,ITGB1,LOX,LOXL2,MCAM,MFGE8,MMP14,SERPINE1,PTGS2,SGCD,NR2F2,THBS1,THY1,TNFAIP2,PLPP3,NRP1,SLIT2,GREM1,EFEMP2,RHOJ,UNC5B	36/517
4_Member	GO Biological Processes	GO:0048514	blood vessel morphogenesis	-18.6367	-15.5434	90,800,857,1282,1295,1464,1490,1893,2049,2335,3162,3491,3678,3688,4015,4017,4162,4240,4323,5054,5743,6444,7026,7057,7070,7127,8829,9353,26585,30008,57381,219699	ACVR1,CALD1,CAV1,COL4A1,COL8A1,CSPG4,CCN2,ECM1,EPHB3,FN1,HMOX1,CCN1,ITGA5,ITGB1,LOX,LOXL2,MCAM,MFGE8,MMP14,SERPINE1,PTGS2,SGCD,NR2F2,THBS1,THY1,TNFAIP2,NRP1,SLIT2,GREM1,EFEMP2,RHOJ,UNC5B	32/430
4_Member	GO Biological Processes	GO:0035239	tube morphogenesis	-17.8505	-14.8242	90,800,857,1282,1295,1435,1464,1490,1893,2049,2335,2535,3162,3491,3678,3688,4015,4017,4162,4240,4323,5054,5743,6444,7026,7057,7070,7127,8829,9353,9645,10253,10395,26585,30008,57381,219699,342184	ACVR1,CALD1,CAV1,COL4A1,COL8A1,CSF1,CSPG4,CCN2,ECM1,EPHB3,FN1,FZD2,HMOX1,CCN1,ITGA5,ITGB1,LOX,LOXL2,MCAM,MFGE8,MMP14,SERPINE1,PTGS2,SGCD,NR2F2,THBS1,THY1,TNFAIP2,NRP1,SLIT2,MICAL2,SPRY2,DLC1,GREM1,EFEMP2,RHOJ,UNC5B,FMN1	38/679
4_Member	GO Biological Processes	GO:0030335	positive regulation of cell migration	-17.75	-14.7632	90,857,1277,1435,1601,2149,2152,2260,2335,3162,3491,3678,3688,4067,4162,4323,5054,5328,5743,5764,6678,7057,7070,8613,8829,8840,10253,10457,10630,57381,58515,85360,131578,152007,646960	ACVR1,CAV1,COL1A1,CSF1,DAB2,F2R,F3,FGFR1,FN1,HMOX1,CCN1,ITGA5,ITGB1,LYN,MCAM,MMP14,SERPINE1,PLAU,PTGS2,PTN,SPARC,THBS1,THY1,PLPP3,NRP1,CCN4,SPRY2,GPNMB,PDPN,RHOJ,SELENOK,SYDE1,LRRC15,GLIPR2,PRSS56	35/568
4_Member	GO Biological Processes	GO:0040017	positive regulation of locomotion	-17.6961	-14.7455	90,857,1277,1435,1601,2149,2152,2260,2335,3162,3491,3678,3688,4067,4162,4323,5054,5328,5743,5764,6678,7057,7070,8613,8829,8840,9353,10253,10457,10630,57381,58515,85360,131578,152007,646960	ACVR1,CAV1,COL1A1,CSF1,DAB2,F2R,F3,FGFR1,FN1,HMOX1,CCN1,ITGA5,ITGB1,LYN,MCAM,MMP14,SERPINE1,PLAU,PTGS2,PTN,SPARC,THBS1,THY1,PLPP3,NRP1,CCN4,SLIT2,SPRY2,GPNMB,PDPN,RHOJ,SELENOK,SYDE1,LRRC15,GLIPR2,PRSS56	36/608
4_Member	GO Biological Processes	GO:0001525	angiogenesis	-17.6277	-14.6941	90,800,857,1282,1295,1464,1490,1893,2049,2335,3162,3491,3678,3688,4017,4162,4240,4323,5054,5743,7057,7070,7127,8829,9353,26585,57381,219699	ACVR1,CALD1,CAV1,COL4A1,COL8A1,CSPG4,CCN2,ECM1,EPHB3,FN1,HMOX1,CCN1,ITGA5,ITGB1,LOXL2,MCAM,MFGE8,MMP14,SERPINE1,PTGS2,THBS1,THY1,TNFAIP2,NRP1,SLIT2,GREM1,RHOJ,UNC5B	28/336
4_Member	GO Biological Processes	GO:2000147	positive regulation of cell motility	-17.1646	-14.2474	90,857,1277,1435,1601,2149,2152,2260,2335,3162,3491,3678,3688,4067,4162,4323,5054,5328,5743,5764,6678,7057,7070,8613,8829,8840,10253,10457,10630,57381,58515,85360,131578,152007,646960	ACVR1,CAV1,COL1A1,CSF1,DAB2,F2R,F3,FGFR1,FN1,HMOX1,CCN1,ITGA5,ITGB1,LYN,MCAM,MMP14,SERPINE1,PLAU,PTGS2,PTN,SPARC,THBS1,THY1,PLPP3,NRP1,CCN4,SPRY2,GPNMB,PDPN,RHOJ,SELENOK,SYDE1,LRRC15,GLIPR2,PRSS56	35/593
5_Summary	Reactome Gene Sets	R-HSA-1566948	Elastic fibre formation	-21.0551	-17.7479	2199,2202,2335,3678,3688,3694,4015,4017,4053,5045,7043,11117,30008,84034,84171,84695	FBLN2,EFEMP1,FN1,ITGA5,ITGB1,ITGB6,LOX,LOXL2,LTBP2,FURIN,TGFB3,EMILIN1,EFEMP2,EMILIN2,LOXL4,LOXL3	16/-
5_Member	Reactome Gene Sets	R-HSA-1566948	Elastic fibre formation	-21.0551	-17.7479	2199,2202,2335,3678,3688,3694,4015,4017,4053,5045,7043,11117,30008,84034,84171,84695	FBLN2,EFEMP1,FN1,ITGA5,ITGB1,ITGB6,LOX,LOXL2,LTBP2,FURIN,TGFB3,EMILIN1,EFEMP2,EMILIN2,LOXL4,LOXL3	16/44
5_Member	Reactome Gene Sets	R-HSA-2129379	Molecules associated with elastic fibres	-11.8669	-9.27418	2199,2202,2335,3688,3694,4053,7043,11117,30008,84034	FBLN2,EFEMP1,FN1,ITGB1,ITGB6,LTBP2,TGFB3,EMILIN1,EFEMP2,EMILIN2	10/37
6_Summary	GO Biological Processes	GO:0009611	response to wounding	-18.9593	-15.8148	558,960,1265,1277,1289,1465,1490,2149,2152,2335,2596,3162,3371,3491,3678,3688,3694,3913,4015,4067,4162,5328,5341,7035,7043,7056,7070,7168,8613,8829,10398,10630,646960,857,5054,5592,7057,11117,84034	AXL,CD44,CNN2,COL1A1,COL5A1,CSRP1,CCN2,F2R,F3,FN1,GAP43,HMOX1,TNC,CCN1,ITGA5,ITGB1,ITGB6,LAMB2,LOX,LYN,MCAM,PLAU,PLEK,TFPI,TGFB3,THBD,THY1,TPM1,PLPP3,NRP1,MYL9,PDPN,PRSS56,CAV1,SERPINE1,PRKG1,THBS1,EMILIN1,EMILIN2	39/-
6_Member	GO Biological Processes	GO:0009611	response to wounding	-18.9593	-15.8148	558,960,1265,1277,1289,1465,1490,2149,2152,2335,2596,3162,3371,3491,3678,3688,3694,3913,4015,4067,4162,5328,5341,7035,7043,7056,7070,7168,8613,8829,10398,10630,646960	AXL,CD44,CNN2,COL1A1,COL5A1,CSRP1,CCN2,F2R,F3,FN1,GAP43,HMOX1,TNC,CCN1,ITGA5,ITGB1,ITGB6,LAMB2,LOX,LYN,MCAM,PLAU,PLEK,TFPI,TGFB3,THBD,THY1,TPM1,PLPP3,NRP1,MYL9,PDPN,PRSS56	33/452
6_Member	GO Biological Processes	GO:0042060	wound healing	-15.6736	-12.8435	558,960,1265,1277,1289,1465,2149,2152,2335,3162,3491,3678,3688,3694,4015,4162,5328,5341,7035,7043,7056,7168,8613,10398,10630,646960	AXL,CD44,CNN2,COL1A1,COL5A1,CSRP1,F2R,F3,FN1,HMOX1,CCN1,ITGA5,ITGB1,ITGB6,LOX,MCAM,PLAU,PLEK,TFPI,TGFB3,THBD,TPM1,PLPP3,MYL9,PDPN,PRSS56	26/334
6_Member	GO Biological Processes	GO:0050878	regulation of body fluid levels	-7.33374	-5.1727	558,857,1465,2149,2152,5054,5328,5341,5592,7035,7056,7057,10398,10630,11117,84034,646960	AXL,CAV1,CSRP1,F2R,F3,SERPINE1,PLAU,PLEK,PRKG1,TFPI,THBD,THBS1,MYL9,PDPN,EMILIN1,EMILIN2,PRSS56	17/349
6_Member	GO Biological Processes	GO:0007596	blood coagulation	-6.03717	-4.07063	558,1465,2149,2152,5328,5341,7035,7056,10398,10630,646960	AXL,CSRP1,F2R,F3,PLAU,PLEK,TFPI,THBD,MYL9,PDPN,PRSS56	11/174
6_Member	GO Biological Processes	GO:0050817	coagulation	-5.98818	-4.03232	558,1465,2149,2152,5328,5341,7035,7056,10398,10630,646960	AXL,CSRP1,F2R,F3,PLAU,PLEK,TFPI,THBD,MYL9,PDPN,PRSS56	11/176
6_Member	GO Biological Processes	GO:0007599	hemostasis	-5.89214	-3.94671	558,1465,2149,2152,5328,5341,7035,7056,10398,10630,646960	AXL,CSRP1,F2R,F3,PLAU,PLEK,TFPI,THBD,MYL9,PDPN,PRSS56	11/180
6_Member	GO Biological Processes	GO:0030168	platelet activation	-3.4386	-1.87537	558,1465,2149,5341,10398,10630	AXL,CSRP1,F2R,PLEK,MYL9,PDPN	6/99
6_Member	GO Biological Processes	GO:0034109	homotypic cell-cell adhesion	-2.49654	-1.10654	1465,5341,8613,10398	CSRP1,PLEK,PLPP3,MYL9	4/64
6_Member	GO Biological Processes	GO:0070527	platelet aggregation	-2.0007	-0.69274	1465,5341,10398	CSRP1,PLEK,MYL9	3/47
7_Summary	Reactome Gene Sets	R-HSA-2243919	Crosslinking of collagen fibrils	-17.8735	-14.8259	649,1277,1278,1282,1287,4015,4017,5118,7092,84171,84695,2335,3371,3491,5328,6696,7057,7070,2152,5054,7043,7056,7412,598,1290,1307,1490,4067,7009,3913,22801,3688,3572,8829,2149,5592,103910,10630,3667,6678,219699,1280,5819	BMP1,COL1A1,COL1A2,COL4A1,COL4A5,LOX,LOXL2,PCOLCE,TLL1,LOXL4,LOXL3,FN1,TNC,CCN1,PLAU,SPP1,THBS1,THY1,F3,SERPINE1,TGFB3,THBD,VCAM1,BCL2L1,COL5A2,COL16A1,CCN2,LYN,TMBIM6,LAMB2,ITGA11,ITGB1,IL6ST,NRP1,F2R,PRKG1,MYL12B,PDPN,IRS1,SPARC,UNC5B,COL2A1,NECTIN2	43/-
7_Member	Reactome Gene Sets	R-HSA-2243919	Crosslinking of collagen fibrils	-17.8735	-14.8259	649,1277,1278,1282,1287,4015,4017,5118,7092,84171,84695	BMP1,COL1A1,COL1A2,COL4A1,COL4A5,LOX,LOXL2,PCOLCE,TLL1,LOXL4,LOXL3	11/18
7_Member	Canonical Pathways	M53	PID INTEGRIN3 PATHWAY	-12.7073	-10.0489	1277,1278,1282,1287,2335,3371,3491,5328,6696,7057,7070	COL1A1,COL1A2,COL4A1,COL4A5,FN1,TNC,CCN1,PLAU,SPP1,THBS1,THY1	11/43
7_Member	Reactome Gene Sets	R-HSA-2214320	Anchoring fibril formation	-8.50007	-6.20459	649,1277,1278,1282,1287,7092	BMP1,COL1A1,COL1A2,COL4A1,COL4A5,TLL1	6/15
7_Member	KEGG Pathway	hsa04933	AGE-RAGE signaling pathway in diabetic complications	-7.398	-5.2197	1277,1278,1282,1287,2152,2335,5054,7043,7056,7412	COL1A1,COL1A2,COL4A1,COL4A5,F3,FN1,SERPINE1,TGFB3,THBD,VCAM1	10/100
7_Member	GO Biological Processes	GO:0043200	response to amino acid	-5.59191	-3.69051	598,1277,1278,1282,1290,1307,1490,4067,7009	BCL2L1,COL1A1,COL1A2,COL4A1,COL5A2,COL16A1,CCN2,LYN,TMBIM6	9/122
7_Member	GO Biological Processes	GO:0001101	response to acid chemical	-5.1518	-3.31646	598,1277,1278,1282,1290,1307,1490,4067,7009	BCL2L1,COL1A1,COL1A2,COL4A1,COL5A2,COL16A1,CCN2,LYN,TMBIM6	9/138
7_Member	WikiPathways	WP453	Inflammatory response pathway	-5.06686	-3.24786	1277,1278,2335,3913,7057	COL1A1,COL1A2,FN1,LAMB2,THBS1	5/30
7_Member	GO Biological Processes	GO:0038065	collagen-activated signaling pathway	-5.00674	-3.19852	1277,1282,1287,22801	COL1A1,COL4A1,COL4A5,ITGA11	4/15
7_Member	Reactome Gene Sets	R-HSA-75892	Platelet Adhesion to exposed collagen	-5.00674	-3.19852	1277,1278,3688,4067	COL1A1,COL1A2,ITGB1,LYN	4/15
7_Member	KEGG Pathway	hsa05146	Amoebiasis	-4.26813	-2.56695	1277,1278,1282,1287,2335,3913,7043	COL1A1,COL1A2,COL4A1,COL4A5,FN1,LAMB2,TGFB3	7/102
7_Member	GO Biological Processes	GO:0038063	collagen-activated tyrosine kinase receptor signaling pathway	-4.01955	-2.35494	1277,1282,1287	COL1A1,COL4A1,COL4A5	3/10
7_Member	GO Biological Processes	GO:0071230	cellular response to amino acid stimulus	-3.88567	-2.24331	598,1277,1278,1282,1290,1307	BCL2L1,COL1A1,COL1A2,COL4A1,COL5A2,COL16A1	6/82
7_Member	WikiPathways	WP5036	Angiotensin II receptor type 1 pathway	-3.87272	-2.23513	1277,1278,1490,3572	COL1A1,COL1A2,CCN2,IL6ST	4/28
7_Member	WikiPathways	WP5144	NRP1-triggered signaling pathways in pancreatic cancer	-3.80109	-2.17687	1277,1278,1490,7043,8829	COL1A1,COL1A2,CCN2,TGFB3,NRP1	5/54
7_Member	KEGG Pathway	hsa04611	Platelet activation	-3.73442	-2.12305	1277,1278,2149,3688,4067,5592,103910	COL1A1,COL1A2,F2R,ITGB1,LYN,PRKG1,MYL12B	7/124
7_Member	GO Biological Processes	GO:0071229	cellular response to acid chemical	-3.63687	-2.04189	598,1277,1278,1282,1290,1307	BCL2L1,COL1A1,COL1A2,COL4A1,COL5A2,COL16A1	6/91
7_Member	WikiPathways	WP4786	Type I collagen synthesis in the context of osteogenesis imperfecta	-3.58815	-2.00001	649,1277,1278,4015	BMP1,COL1A1,COL1A2,LOX	4/33
7_Member	Reactome Gene Sets	R-HSA-114604	GPVI-mediated activation cascade	-3.48753	-1.90879	1277,1278,4067,10630	COL1A1,COL1A2,LYN,PDPN	4/35
7_Member	Canonical Pathways	M28	PID IL4 2PATHWAY	-3.4523	-1.88406	598,1277,1278,3667,7070	BCL2L1,COL1A1,COL1A2,IRS1,THY1	5/64
7_Member	Reactome Gene Sets	R-HSA-2173782	Binding and Uptake of Ligands by Scavenger Receptors	-3.18012	-1.65503	1277,1278,1282,6678	COL1A1,COL1A2,COL4A1,SPARC	4/42
7_Member	Reactome Gene Sets	R-HSA-3000480	Scavenging by Class A Receptors	-3.1398	-1.62311	1277,1278,1282	COL1A1,COL1A2,COL4A1	3/19
7_Member	WikiPathways	WP4747	Netrin-UNC5B signaling pathway	-2.82865	-1.3744	1277,1490,7412,219699	COL1A1,CCN2,VCAM1,UNC5B	4/52
7_Member	Reactome Gene Sets	R-HSA-198933	Immunoregulatory interactions between a Lymphoid and a non-Lymphoid cell	-2.7511	-1.31156	1277,1278,1280,3688,5819,7412	COL1A1,COL1A2,COL2A1,ITGB1,NECTIN2,VCAM1	6/134
7_Member	Reactome Gene Sets	R-HSA-76009	Platelet Aggregation (Plug Formation)	-2.22569	-0.878432	1277,1278,2335	COL1A1,COL1A2,FN1	3/39
8_Summary	GO Biological Processes	GO:0010810	regulation of cell-substrate adhesion	-17.7699	-14.7638	1277,1295,1307,1435,1601,2199,2335,3491,3678,4323,5054,5328,7057,7070,8829,10395,10630,11117,26585,30008,55679,79834,90102,342184,857,960,2650,3572,3913,4067,6604,7168,7412,8613,10211,58515,84034,2049,2239,7058,23768,1490,5341,7043,11346,23433,25802,57482	COL1A1,COL8A1,COL16A1,CSF1,DAB2,FBLN2,FN1,CCN1,ITGA5,MMP14,SERPINE1,PLAU,THBS1,THY1,NRP1,DLC1,PDPN,EMILIN1,GREM1,EFEMP2,LIMS2,PEAK1,PHLDB2,FMN1,CAV1,CD44,GCNT1,IL6ST,LAMB2,LYN,SMARCD3,TPM1,VCAM1,PLPP3,FLOT1,SELENOK,EMILIN2,EPHB3,GPC4,THBS2,FLRT2,CCN2,PLEK,TGFB3,SYNPO,RHOQ,LMOD1,CRACD	48/-
8_Member	GO Biological Processes	GO:0010810	regulation of cell-substrate adhesion	-17.7699	-14.7638	1277,1295,1307,1435,1601,2199,2335,3491,3678,4323,5054,5328,7057,7070,8829,10395,10630,11117,26585,30008,55679,79834,90102,342184	COL1A1,COL8A1,COL16A1,CSF1,DAB2,FBLN2,FN1,CCN1,ITGA5,MMP14,SERPINE1,PLAU,THBS1,THY1,NRP1,DLC1,PDPN,EMILIN1,GREM1,EFEMP2,LIMS2,PEAK1,PHLDB2,FMN1	24/222
8_Member	GO Biological Processes	GO:0045785	positive regulation of cell adhesion	-13.6137	-10.8884	857,960,1295,1307,1435,1601,2199,2335,2650,3491,3572,3678,3913,4067,6604,7070,7168,7412,8613,8829,10211,10630,11117,30008,55679,58515,84034,342184	CAV1,CD44,COL8A1,COL16A1,CSF1,DAB2,FBLN2,FN1,GCNT1,CCN1,IL6ST,ITGA5,LAMB2,LYN,SMARCD3,THY1,TPM1,VCAM1,PLPP3,NRP1,FLOT1,PDPN,EMILIN1,EFEMP2,LIMS2,SELENOK,EMILIN2,FMN1	28/482
8_Member	GO Biological Processes	GO:0001952	regulation of cell-matrix adhesion	-10.7972	-8.28111	1307,1435,4323,5054,5328,7057,7070,8829,10395,26585,30008,79834,90102,342184	COL16A1,CSF1,MMP14,SERPINE1,PLAU,THBS1,THY1,NRP1,DLC1,GREM1,EFEMP2,PEAK1,PHLDB2,FMN1	14/125
8_Member	GO Biological Processes	GO:0010811	positive regulation of cell-substrate adhesion	-10.7972	-8.28111	1295,1307,1435,1601,2199,2335,3491,3678,7070,8829,11117,30008,55679,342184	COL8A1,COL16A1,CSF1,DAB2,FBLN2,FN1,CCN1,ITGA5,THY1,NRP1,EMILIN1,EFEMP2,LIMS2,FMN1	14/125
8_Member	GO Biological Processes	GO:1901888	regulation of cell junction assembly	-9.58182	-7.18266	857,1307,2049,2239,4323,7057,7058,7070,8829,10211,10395,23768,26585,79834,90102,342184	CAV1,COL16A1,EPHB3,GPC4,MMP14,THBS1,THBS2,THY1,NRP1,FLOT1,DLC1,FLRT2,GREM1,PEAK1,PHLDB2,FMN1	16/214
8_Member	GO Biological Processes	GO:0051893	regulation of focal adhesion assembly	-9.32608	-6.96429	1307,4323,7057,7070,8829,10395,26585,79834,90102,342184	COL16A1,MMP14,THBS1,THY1,NRP1,DLC1,GREM1,PEAK1,PHLDB2,FMN1	10/64
8_Member	GO Biological Processes	GO:0090109	regulation of cell-substrate junction assembly	-9.32608	-6.96429	1307,4323,7057,7070,8829,10395,26585,79834,90102,342184	COL16A1,MMP14,THBS1,THY1,NRP1,DLC1,GREM1,PEAK1,PHLDB2,FMN1	10/64
8_Member	GO Biological Processes	GO:0150116	regulation of cell-substrate junction organization	-8.99294	-6.65722	1307,4323,7057,7070,8829,10395,26585,79834,90102,342184	COL16A1,MMP14,THBS1,THY1,NRP1,DLC1,GREM1,PEAK1,PHLDB2,FMN1	10/69
8_Member	GO Biological Processes	GO:0044089	positive regulation of cellular component biogenesis	-6.36449	-4.34226	857,1307,1490,2049,5341,7043,7058,7070,7168,8829,10211,11117,11346,23433,23768,25802,57482,90102,342184	CAV1,COL16A1,CCN2,EPHB3,PLEK,TGFB3,THBS2,THY1,TPM1,NRP1,FLOT1,EMILIN1,SYNPO,RHOQ,FLRT2,LMOD1,CRACD,PHLDB2,FMN1	19/506
8_Member	GO Biological Processes	GO:1901890	positive regulation of cell junction assembly	-6.10459	-4.12525	857,1307,2049,7058,7070,8829,10211,23768,342184	CAV1,COL16A1,EPHB3,THBS2,THY1,NRP1,FLOT1,FLRT2,FMN1	9/106
8_Member	GO Biological Processes	GO:0001954	positive regulation of cell-matrix adhesion	-4.82932	-3.04306	1307,1435,7070,8829,30008,342184	COL16A1,CSF1,THY1,NRP1,EFEMP2,FMN1	6/56
8_Member	GO Biological Processes	GO:0051894	positive regulation of focal adhesion assembly	-4.00284	-2.34537	1307,7070,8829,342184	COL16A1,THY1,NRP1,FMN1	4/26
8_Member	GO Biological Processes	GO:0150117	positive regulation of cell-substrate junction organization	-3.6958	-2.0931	1307,7070,8829,342184	COL16A1,THY1,NRP1,FMN1	4/31
9_Summary	GO Biological Processes	GO:0007167	enzyme-linked receptor protein signaling pathway	-13.9204	-11.1846	90,558,858,1277,1278,1282,1287,1435,1464,1490,2049,2202,2260,3572,3667,3694,4015,4053,4067,5045,5764,7041,7043,7763,7791,8829,10253,10580,10818,23433,23768,51232	ACVR1,AXL,CAV2,COL1A1,COL1A2,COL4A1,COL4A5,CSF1,CSPG4,CCN2,EPHB3,EFEMP1,FGFR1,IL6ST,IRS1,ITGB6,LOX,LTBP2,LYN,FURIN,PTN,TGFB1I1,TGFB3,ZFAND5,ZYX,NRP1,SPRY2,SORBS1,FRS2,RHOQ,FLRT2,CRIM1	32/-
9_Member	GO Biological Processes	GO:0007167	enzyme-linked receptor protein signaling pathway	-13.9204	-11.1846	90,558,858,1277,1278,1282,1287,1435,1464,1490,2049,2202,2260,3572,3667,3694,4015,4053,4067,5045,5764,7041,7043,7763,7791,8829,10253,10580,10818,23433,23768,51232	ACVR1,AXL,CAV2,COL1A1,COL1A2,COL4A1,COL4A5,CSF1,CSPG4,CCN2,EPHB3,EFEMP1,FGFR1,IL6ST,IRS1,ITGB6,LOX,LTBP2,LYN,FURIN,PTN,TGFB1I1,TGFB3,ZFAND5,ZYX,NRP1,SPRY2,SORBS1,FRS2,RHOQ,FLRT2,CRIM1	32/628
9_Member	GO Biological Processes	GO:0007169	transmembrane receptor protein tyrosine kinase signaling pathway	-9.96678	-7.51585	558,858,1277,1282,1287,1435,1464,1490,2049,2202,2260,3667,4015,4067,7763,8829,10253,10580,10818,23433,23768,51232	AXL,CAV2,COL1A1,COL4A1,COL4A5,CSF1,CSPG4,CCN2,EPHB3,EFEMP1,FGFR1,IRS1,LOX,LYN,ZFAND5,NRP1,SPRY2,SORBS1,FRS2,RHOQ,FLRT2,CRIM1	22/418
10_Summary	GO Biological Processes	GO:0048729	tissue morphogenesis	-13.4936	-10.7785	58,90,960,1282,1289,1301,1435,1741,2195,2535,2650,3371,3491,3678,3688,3868,4323,7041,7168,8091,8829,9353,9645,10253,10395,10630,10818,26585,30008,342184,57381	ACTA1,ACVR1,CD44,COL4A1,COL5A1,COL11A1,CSF1,DLG3,FAT1,FZD2,GCNT1,TNC,CCN1,ITGA5,ITGB1,KRT16,MMP14,TGFB1I1,TPM1,HMGA2,NRP1,SLIT2,MICAL2,SPRY2,DLC1,PDPN,FRS2,GREM1,EFEMP2,FMN1,RHOJ	31/-
10_Member	GO Biological Processes	GO:0048729	tissue morphogenesis	-13.4936	-10.7785	58,90,960,1282,1289,1301,1435,1741,2195,2535,2650,3371,3491,3678,3688,3868,4323,7041,7168,8091,8829,9353,9645,10253,10395,10630,10818,26585,30008,342184	ACTA1,ACVR1,CD44,COL4A1,COL5A1,COL11A1,CSF1,DLG3,FAT1,FZD2,GCNT1,TNC,CCN1,ITGA5,ITGB1,KRT16,MMP14,TGFB1I1,TPM1,HMGA2,NRP1,SLIT2,MICAL2,SPRY2,DLC1,PDPN,FRS2,GREM1,EFEMP2,FMN1	30/567
10_Member	GO Biological Processes	GO:0002009	morphogenesis of an epithelium	-10.9082	-8.37914	90,960,1282,1289,1435,1741,2195,2535,3371,3491,3678,3688,3868,4323,7041,8829,9353,9645,10253,10395,10630,10818,26585,342184	ACVR1,CD44,COL4A1,COL5A1,CSF1,DLG3,FAT1,FZD2,TNC,CCN1,ITGA5,ITGB1,KRT16,MMP14,TGFB1I1,NRP1,SLIT2,MICAL2,SPRY2,DLC1,PDPN,FRS2,GREM1,FMN1	24/452
10_Member	GO Biological Processes	GO:0060562	epithelial tube morphogenesis	-4.32574	-2.61467	90,1282,1435,2535,4323,8829,9353,9645,10253,10395,26585,342184	ACVR1,COL4A1,CSF1,FZD2,MMP14,NRP1,SLIT2,MICAL2,SPRY2,DLC1,GREM1,FMN1	12/312
10_Member	GO Biological Processes	GO:0061299	retina vasculature morphogenesis in camera-type eye	-4.01955	-2.35494	1282,8829,57381	COL4A1,NRP1,RHOJ	3/10
10_Member	GO Biological Processes	GO:0061138	morphogenesis of a branching epithelium	-3.73314	-2.12257	90,1282,1435,4323,8829,9353,10253,10818	ACVR1,COL4A1,CSF1,MMP14,NRP1,SLIT2,SPRY2,FRS2	8/165
10_Member	GO Biological Processes	GO:0001763	morphogenesis of a branching structure	-3.55951	-1.97438	90,1282,1435,4323,8829,9353,10253,10818	ACVR1,COL4A1,CSF1,MMP14,NRP1,SLIT2,SPRY2,FRS2	8/175
10_Member	GO Biological Processes	GO:0048754	branching morphogenesis of an epithelial tube	-3.46923	-1.89519	90,1282,1435,4323,8829,9353,10253	ACVR1,COL4A1,CSF1,MMP14,NRP1,SLIT2,SPRY2	7/137
10_Member	GO Biological Processes	GO:0061298	retina vasculature development in camera-type eye	-3.1398	-1.62311	1282,8829,57381	COL4A1,NRP1,RHOJ	3/19
10_Member	GO Biological Processes	GO:0001569	branching involved in blood vessel morphogenesis	-2.47001	-1.08477	90,1282,8829	ACVR1,COL4A1,NRP1	3/32
11_Summary	GO Biological Processes	GO:0008285	negative regulation of cell population proliferation	-13.4458	-10.7407	857,858,1264,1601,1741,2149,3162,3300,3490,4067,5592,5621,5743,5764,5797,6586,6678,7026,7041,7043,7057,7168,8611,9294,9536,9821,10253,10395,10457,10630,10668,26585,30008,55679,80762	CAV1,CAV2,CNN1,DAB2,DLG3,F2R,HMOX1,DNAJB2,IGFBP7,LYN,PRKG1,PRNP,PTGS2,PTN,PTPRM,SLIT3,SPARC,NR2F2,TGFB1I1,TGFB3,THBS1,TPM1,PLPP1,S1PR2,PTGES,RB1CC1,SPRY2,DLC1,GPNMB,PDPN,CGRRF1,GREM1,EFEMP2,LIMS2,NDFIP1	35/-
11_Member	GO Biological Processes	GO:0008285	negative regulation of cell population proliferation	-13.4458	-10.7407	857,858,1264,1601,1741,2149,3162,3300,3490,4067,5592,5621,5743,5764,5797,6586,6678,7026,7041,7043,7057,7168,8611,9294,9536,9821,10253,10395,10457,10630,10668,26585,30008,55679,80762	CAV1,CAV2,CNN1,DAB2,DLG3,F2R,HMOX1,DNAJB2,IGFBP7,LYN,PRKG1,PRNP,PTGS2,PTN,PTPRM,SLIT3,SPARC,NR2F2,TGFB1I1,TGFB3,THBS1,TPM1,PLPP1,S1PR2,PTGES,RB1CC1,SPRY2,DLC1,GPNMB,PDPN,CGRRF1,GREM1,EFEMP2,LIMS2,NDFIP1	35/787
12_Summary	GO Biological Processes	GO:0042327	positive regulation of phosphorylation	-12.9317	-10.2364	90,558,857,960,1435,1464,1490,1601,1741,2260,3491,3572,3667,3678,4067,4665,5621,5743,7043,7057,8091,8613,8829,9244,9294,9821,10211,10253,10457,26585,94056,120892,338773,345611,7026,7070,9353,11117,5341,7078	ACVR1,AXL,CAV1,CD44,CSF1,CSPG4,CCN2,DAB2,DLG3,FGFR1,CCN1,IL6ST,IRS1,ITGA5,LYN,NAB2,PRNP,PTGS2,TGFB3,THBS1,HMGA2,PLPP3,NRP1,CRLF1,S1PR2,RB1CC1,FLOT1,SPRY2,GPNMB,GREM1,SYAP1,LRRK2,TMEM119,IRGM,NR2F2,THY1,SLIT2,EMILIN1,PLEK,TIMP3	40/-
12_Member	GO Biological Processes	GO:0042327	positive regulation of phosphorylation	-12.9317	-10.2364	90,558,857,960,1435,1464,1490,1601,1741,2260,3491,3572,3667,3678,4067,4665,5621,5743,7043,7057,8091,8613,8829,9244,9294,9821,10211,10253,10457,26585,94056,120892,338773,345611	ACVR1,AXL,CAV1,CD44,CSF1,CSPG4,CCN2,DAB2,DLG3,FGFR1,CCN1,IL6ST,IRS1,ITGA5,LYN,NAB2,PRNP,PTGS2,TGFB3,THBS1,HMGA2,PLPP3,NRP1,CRLF1,S1PR2,RB1CC1,FLOT1,SPRY2,GPNMB,GREM1,SYAP1,LRRK2,TMEM119,IRGM	34/773
12_Member	GO Biological Processes	GO:0001934	positive regulation of protein phosphorylation	-12.4044	-9.78826	90,857,960,1435,1464,1490,1601,1741,2260,3491,3572,3678,4067,4665,5621,5743,7043,7057,8091,8613,8829,9244,9294,9821,10211,10253,10457,26585,94056,120892,338773,345611	ACVR1,CAV1,CD44,CSF1,CSPG4,CCN2,DAB2,DLG3,FGFR1,CCN1,IL6ST,ITGA5,LYN,NAB2,PRNP,PTGS2,TGFB3,THBS1,HMGA2,PLPP3,NRP1,CRLF1,S1PR2,RB1CC1,FLOT1,SPRY2,GPNMB,GREM1,SYAP1,LRRK2,TMEM119,IRGM	32/714
12_Member	GO Biological Processes	GO:0033674	positive regulation of kinase activity	-4.77715	-2.99913	558,1435,1741,2260,3491,3667,4067,4665,5621,7057,8091,26585,94056,120892,345611	AXL,CSF1,DLG3,FGFR1,CCN1,IRS1,LYN,NAB2,PRNP,THBS1,HMGA2,GREM1,SYAP1,LRRK2,IRGM	15/429
12_Member	GO Biological Processes	GO:0043549	regulation of kinase activity	-4.725	-2.9585	558,857,1435,1601,1741,2260,3491,3667,4067,4665,5621,7026,7057,7070,8091,10253,26585,94056,120892,345611	AXL,CAV1,CSF1,DAB2,DLG3,FGFR1,CCN1,IRS1,LYN,NAB2,PRNP,NR2F2,THBS1,THY1,HMGA2,SPRY2,GREM1,SYAP1,LRRK2,IRGM	20/717
12_Member	GO Biological Processes	GO:0045859	regulation of protein kinase activity	-4.50351	-2.77509	857,1435,1601,1741,2260,3491,4067,4665,5621,7026,7057,7070,8091,10253,26585,94056,120892,345611	CAV1,CSF1,DAB2,DLG3,FGFR1,CCN1,LYN,NAB2,PRNP,NR2F2,THBS1,THY1,HMGA2,SPRY2,GREM1,SYAP1,LRRK2,IRGM	18/623
12_Member	Canonical Pathways	M50	PID PTP1B PATHWAY	-3.87964	-2.2395	857,1435,3667,4067,10253	CAV1,CSF1,IRS1,LYN,SPRY2	5/52
12_Member	GO Biological Processes	GO:0051347	positive regulation of transferase activity	-3.80968	-2.18128	558,1435,1741,2260,3491,3667,4067,4665,5621,7057,8091,26585,94056,120892,345611	AXL,CSF1,DLG3,FGFR1,CCN1,IRS1,LYN,NAB2,PRNP,THBS1,HMGA2,GREM1,SYAP1,LRRK2,IRGM	15/523
12_Member	GO Biological Processes	GO:0045860	positive regulation of protein kinase activity	-3.69676	-2.0931	1435,1741,2260,3491,4665,5621,7057,8091,26585,94056,120892,345611	CSF1,DLG3,FGFR1,CCN1,NAB2,PRNP,THBS1,HMGA2,GREM1,SYAP1,LRRK2,IRGM	12/364
12_Member	GO Biological Processes	GO:0071900	regulation of protein serine/threonine kinase activity	-3.69676	-2.0931	857,1601,2260,4067,7026,7057,7070,8091,10253,94056,120892,345611	CAV1,DAB2,FGFR1,LYN,NR2F2,THBS1,THY1,HMGA2,SPRY2,SYAP1,LRRK2,IRGM	12/364
12_Member	GO Biological Processes	GO:0001933	negative regulation of protein phosphorylation	-3.4305	-1.86869	857,4067,5621,7026,7070,8613,9353,10253,11117,26585,120892	CAV1,LYN,PRNP,NR2F2,THY1,PLPP3,SLIT2,SPRY2,EMILIN1,GREM1,LRRK2	11/334
12_Member	GO Biological Processes	GO:0045936	negative regulation of phosphate metabolic process	-3.12414	-1.61001	857,4067,5341,5621,7026,7070,8613,9353,10253,11117,26585,120892	CAV1,LYN,PLEK,PRNP,NR2F2,THY1,PLPP3,SLIT2,SPRY2,EMILIN1,GREM1,LRRK2	12/422
12_Member	GO Biological Processes	GO:0042326	negative regulation of phosphorylation	-3.12109	-1.60759	857,4067,5621,7026,7070,8613,9353,10253,11117,26585,120892	CAV1,LYN,PRNP,NR2F2,THY1,PLPP3,SLIT2,SPRY2,EMILIN1,GREM1,LRRK2	11/364
12_Member	GO Biological Processes	GO:0010563	negative regulation of phosphorus metabolic process	-3.11524	-1.60364	857,4067,5341,5621,7026,7070,8613,9353,10253,11117,26585,120892	CAV1,LYN,PLEK,PRNP,NR2F2,THY1,PLPP3,SLIT2,SPRY2,EMILIN1,GREM1,LRRK2	12/423
12_Member	GO Biological Processes	GO:0070373	negative regulation of ERK1 and ERK2 cascade	-3.05662	-1.55994	1601,4067,7078,10253,11117	DAB2,LYN,TIMP3,SPRY2,EMILIN1	5/78
12_Member	GO Biological Processes	GO:0031400	negative regulation of protein modification process	-2.17767	-0.836005	857,4067,5621,7026,7070,8613,9353,10253,11117,26585,120892	CAV1,LYN,PRNP,NR2F2,THY1,PLPP3,SLIT2,SPRY2,EMILIN1,GREM1,LRRK2	11/483
12_Member	GO Biological Processes	GO:0043409	negative regulation of MAPK cascade	-2.09112	-0.762093	857,1601,4067,7078,10253,11117	CAV1,DAB2,LYN,TIMP3,SPRY2,EMILIN1	6/183
12_Member	GO Biological Processes	GO:0043405	regulation of MAP kinase activity	-2.05824	-0.736216	857,2260,4067,7057,10253,120892	CAV1,FGFR1,LYN,THBS1,SPRY2,LRRK2	6/186
13_Summary	GO Biological Processes	GO:0031589	cell-substrate adhesion	-12.6524	-10.0028	558,960,967,1490,2049,2335,3678,3688,3694,7070,7412,7791,8829,10395,10580,11117,22801,79834,1307,5341,5764,8613,55679	AXL,CD44,CD63,CCN2,EPHB3,FN1,ITGA5,ITGB1,ITGB6,THY1,VCAM1,ZYX,NRP1,DLC1,SORBS1,EMILIN1,ITGA11,PEAK1,COL16A1,PLEK,PTN,PLPP3,LIMS2	23/-
13_Member	GO Biological Processes	GO:0031589	cell-substrate adhesion	-12.6524	-10.0028	558,960,967,1490,2049,2335,3678,3688,3694,7070,7412,7791,8829,10395,10580,11117,22801,79834	AXL,CD44,CD63,CCN2,EPHB3,FN1,ITGA5,ITGB1,ITGB6,THY1,VCAM1,ZYX,NRP1,DLC1,SORBS1,EMILIN1,ITGA11,PEAK1	18/185
13_Member	GO Biological Processes	GO:0007229	integrin-mediated signaling pathway	-12.5306	-9.88961	1307,1490,2335,3678,3688,3694,5341,5764,7070,7791,8613,8829,22801,55679	COL16A1,CCN2,FN1,ITGA5,ITGB1,ITGB6,PLEK,PTN,THY1,ZYX,PLPP3,NRP1,ITGA11,LIMS2	14/94
13_Member	GO Biological Processes	GO:0007160	cell-matrix adhesion	-11.4295	-8.85913	960,967,1490,2335,3678,3688,3694,7070,7412,7791,10395,10580,11117,22801,79834	CD44,CD63,CCN2,FN1,ITGA5,ITGB1,ITGB6,THY1,VCAM1,ZYX,DLC1,SORBS1,EMILIN1,ITGA11,PEAK1	15/136
13_Member	GO Biological Processes	GO:0007044	cell-substrate junction assembly	-5.70159	-3.78292	2335,3678,7070,10395,10580,79834	FN1,ITGA5,THY1,DLC1,SORBS1,PEAK1	6/40
13_Member	GO Biological Processes	GO:0150115	cell-substrate junction organization	-5.57282	-3.67605	2335,3678,7070,10395,10580,79834	FN1,ITGA5,THY1,DLC1,SORBS1,PEAK1	6/42
13_Member	GO Biological Processes	GO:0048041	focal adhesion assembly	-3.81149	-2.18227	7070,10395,10580,79834	THY1,DLC1,SORBS1,PEAK1	4/29
14_Summary	GO Biological Processes	GO:0098609	cell-cell adhesion	-12.4829	-9.85036	90,960,1266,1465,2195,2239,2650,3491,3678,3688,4026,5098,5099,5341,5797,5819,7070,7412,8613,10398,10630,22801,23022,25945,54751,55679,57526,91624,2260,4008,10580,103910,4684,6383	ACVR1,CD44,CNN3,CSRP1,FAT1,GPC4,GCNT1,CCN1,ITGA5,ITGB1,LPP,PCDHGC3,PCDH7,PLEK,PTPRM,NECTIN2,THY1,VCAM1,PLPP3,MYL9,PDPN,ITGA11,PALLD,NECTIN3,FBLIM1,LIMS2,PCDH19,NEXN,FGFR1,LMO7,SORBS1,MYL12B,NCAM1,SDC2	34/-
14_Member	GO Biological Processes	GO:0098609	cell-cell adhesion	-12.4829	-9.85036	90,960,1266,1465,2195,2239,2650,3491,3678,3688,4026,5098,5099,5341,5797,5819,7070,7412,8613,10398,10630,22801,23022,25945,54751,55679,57526,91624	ACVR1,CD44,CNN3,CSRP1,FAT1,GPC4,GCNT1,CCN1,ITGA5,ITGB1,LPP,PCDHGC3,PCDH7,PLEK,PTPRM,NECTIN2,THY1,VCAM1,PLPP3,MYL9,PDPN,ITGA11,PALLD,NECTIN3,FBLIM1,LIMS2,PCDH19,NEXN	28/536
14_Member	GO Biological Processes	GO:0098742	cell-cell adhesion via plasma-membrane adhesion molecules	-6.64396	-4.58096	90,2195,2239,3678,3688,5098,5099,5797,5819,7412,23022,25945,57526,91624	ACVR1,FAT1,GPC4,ITGA5,ITGB1,PCDHGC3,PCDH7,PTPRM,NECTIN2,VCAM1,PALLD,NECTIN3,PCDH19,NEXN	14/261
14_Member	KEGG Pathway	hsa04520	Adherens junction	-5.5307	-3.64304	2260,4008,5797,5819,10398,10580,25945,103910	FGFR1,LMO7,PTPRM,NECTIN2,MYL9,SORBS1,NECTIN3,MYL12B	8/93
14_Member	GO Biological Processes	GO:0007156	homophilic cell adhesion via plasma membrane adhesion molecules	-5.32933	-3.47074	2195,3688,5098,5099,5797,5819,23022,25945,57526,91624	FAT1,ITGB1,PCDHGC3,PCDH7,PTPRM,NECTIN2,PALLD,NECTIN3,PCDH19,NEXN	10/167
14_Member	KEGG Pathway	hsa04514	Cell adhesion molecules	-3.11552	-1.60364	3688,4684,5797,5819,6383,7412,25945	ITGB1,NCAM1,PTPRM,NECTIN2,SDC2,VCAM1,NECTIN3	7/157
14_Member	Canonical Pathways	M72	PID NECTIN PATHWAY	-2.55092	-1.15029	5797,5819,25945	PTPRM,NECTIN2,NECTIN3	3/30
15_Summary	GO Biological Processes	GO:0001503	ossification	-12.4627	-9.83841	649,1277,1278,1280,1290,1301,1435,1490,1893,2274,3371,3491,4015,4323,4665,5743,5764,6696,8840,22801,338773,960,1302,2260,3223,3694,7043,7092,7763,8091,57326,342184	BMP1,COL1A1,COL1A2,COL2A1,COL5A2,COL11A1,CSF1,CCN2,ECM1,FHL2,TNC,CCN1,LOX,MMP14,NAB2,PTGS2,PTN,SPP1,CCN4,ITGA11,TMEM119,CD44,COL11A2,FGFR1,HOXC6,ITGB6,TGFB3,TLL1,ZFAND5,HMGA2,PBXIP1,FMN1	32/-
15_Member	GO Biological Processes	GO:0001503	ossification	-12.4627	-9.83841	649,1277,1278,1280,1290,1301,1435,1490,1893,2274,3371,3491,4015,4323,4665,5743,5764,6696,8840,22801,338773	BMP1,COL1A1,COL1A2,COL2A1,COL5A2,COL11A1,CSF1,CCN2,ECM1,FHL2,TNC,CCN1,LOX,MMP14,NAB2,PTGS2,PTN,SPP1,CCN4,ITGA11,TMEM119	21/279
15_Member	GO Biological Processes	GO:0001501	skeletal system development	-10.1844	-7.71023	649,960,1277,1278,1280,1290,1301,1302,1490,1893,2260,3223,3491,3694,4323,4665,7043,7092,7763,8091,8840,57326,338773,342184	BMP1,CD44,COL1A1,COL1A2,COL2A1,COL5A2,COL11A1,COL11A2,CCN2,ECM1,FGFR1,HOXC6,CCN1,ITGB6,MMP14,NAB2,TGFB3,TLL1,ZFAND5,HMGA2,CCN4,PBXIP1,TMEM119,FMN1	24/490
15_Member	GO Biological Processes	GO:0048705	skeletal system morphogenesis	-5.71084	-3.78716	649,1277,1280,1301,1490,2260,4323,4665,7043,7763,338773,342184	BMP1,COL1A1,COL2A1,COL11A1,CCN2,FGFR1,MMP14,NAB2,TGFB3,ZFAND5,TMEM119,FMN1	12/227
15_Member	GO Biological Processes	GO:0001649	osteoblast differentiation	-5.1518	-3.31646	1277,2274,3371,3491,4015,6696,8840,22801,338773	COL1A1,FHL2,TNC,CCN1,LOX,SPP1,CCN4,ITGA11,TMEM119	9/138
15_Member	GO Biological Processes	GO:0001958	endochondral ossification	-4.99383	-3.18934	1277,1280,4323,4665,338773	COL1A1,COL2A1,MMP14,NAB2,TMEM119	5/31
15_Member	GO Biological Processes	GO:0036075	replacement ossification	-4.99383	-3.18934	1277,1280,4323,4665,338773	COL1A1,COL2A1,MMP14,NAB2,TMEM119	5/31
15_Member	GO Biological Processes	GO:0060348	bone development	-4.0202	-2.35494	1277,1280,1893,3694,4323,4665,7043,8840,338773	COL1A1,COL2A1,ECM1,ITGB6,MMP14,NAB2,TGFB3,CCN4,TMEM119	9/192
15_Member	GO Biological Processes	GO:0060350	endochondral bone morphogenesis	-3.6183	-2.02638	1277,1280,4323,4665,338773	COL1A1,COL2A1,MMP14,NAB2,TMEM119	5/59
15_Member	GO Biological Processes	GO:0060349	bone morphogenesis	-3.46234	-1.88903	1277,1280,4323,4665,7043,338773	COL1A1,COL2A1,MMP14,NAB2,TGFB3,TMEM119	6/98
15_Member	GO Biological Processes	GO:0048706	embryonic skeletal system development	-2.83516	-1.37806	1277,1280,1301,3223,4323,7043	COL1A1,COL2A1,COL11A1,HOXC6,MMP14,TGFB3	6/129
16_Summary	GO Biological Processes	GO:0032989	cellular component morphogenesis	-12.1289	-9.52071	58,598,1465,2049,2596,3688,3913,4629,4684,5592,5764,5797,5819,6383,6586,7168,8829,9353,10211,10398,10857,23022,23181,23768,25802,57498,91624,120892,219699,1280,1282,1287,1289,1290,1741,2260,3678,3983,4067,4665,5621,10818,30011,103910,2195,3694,26585,3491,4015,5328,5337,7412,10457,3371,84552	ACTA1,BCL2L1,CSRP1,EPHB3,GAP43,ITGB1,LAMB2,MYH11,NCAM1,PRKG1,PTN,PTPRM,NECTIN2,SDC2,SLIT3,TPM1,NRP1,SLIT2,FLOT1,MYL9,PGRMC1,PALLD,DIP2A,FLRT2,LMOD1,KIDINS220,NEXN,LRRK2,UNC5B,COL2A1,COL4A1,COL4A5,COL5A1,COL5A2,DLG3,FGFR1,ITGA5,ABLIM1,LYN,NAB2,PRNP,FRS2,SH3KBP1,MYL12B,FAT1,ITGB6,GREM1,CCN1,LOX,PLAU,PLD1,VCAM1,GPNMB,TNC,PARD6G	55/-
16_Member	GO Biological Processes	GO:0032989	cellular component morphogenesis	-12.1289	-9.52071	58,598,1465,2049,2596,3688,3913,4629,4684,5592,5764,5797,5819,6383,6586,7168,8829,9353,10211,10398,10857,23022,23181,23768,25802,57498,91624,120892,219699	ACTA1,BCL2L1,CSRP1,EPHB3,GAP43,ITGB1,LAMB2,MYH11,NCAM1,PRKG1,PTN,PTPRM,NECTIN2,SDC2,SLIT3,TPM1,NRP1,SLIT2,FLOT1,MYL9,PGRMC1,PALLD,DIP2A,FLRT2,LMOD1,KIDINS220,NEXN,LRRK2,UNC5B	29/597
16_Member	Reactome Gene Sets	R-HSA-9675108	Nervous system development	-10.1837	-7.71023	1280,1282,1287,1289,1290,1741,2049,2260,2596,3678,3688,3983,4067,4629,4665,4684,5621,6383,6586,8829,9353,10398,10818,30011,103910,219699	COL2A1,COL4A1,COL4A5,COL5A1,COL5A2,DLG3,EPHB3,FGFR1,GAP43,ITGA5,ITGB1,ABLIM1,LYN,MYH11,NAB2,NCAM1,PRNP,SDC2,SLIT3,NRP1,SLIT2,MYL9,FRS2,SH3KBP1,MYL12B,UNC5B	26/578
16_Member	Reactome Gene Sets	R-HSA-422475	Axon guidance	-9.85472	-7.41997	1280,1282,1287,1289,1290,1741,2049,2260,2596,3678,3688,3983,4067,4629,4684,5621,6383,6586,8829,9353,10398,10818,30011,103910,219699	COL2A1,COL4A1,COL4A5,COL5A1,COL5A2,DLG3,EPHB3,FGFR1,GAP43,ITGA5,ITGB1,ABLIM1,LYN,MYH11,NCAM1,PRNP,SDC2,SLIT3,NRP1,SLIT2,MYL9,FRS2,SH3KBP1,MYL12B,UNC5B	25/553
16_Member	GO Biological Processes	GO:0032990	cell part morphogenesis	-9.35131	-6.98047	598,2049,2596,3688,3913,4684,5592,5764,5797,5819,6383,6586,8829,9353,10211,10857,23022,23181,23768,57498,91624,120892,219699	BCL2L1,EPHB3,GAP43,ITGB1,LAMB2,NCAM1,PRKG1,PTN,PTPRM,NECTIN2,SDC2,SLIT3,NRP1,SLIT2,FLOT1,PGRMC1,PALLD,DIP2A,FLRT2,KIDINS220,NEXN,LRRK2,UNC5B	23/494
16_Member	GO Biological Processes	GO:0048812	neuron projection morphogenesis	-8.36582	-6.08545	2049,2596,3688,3913,4684,5592,5764,5797,6383,6586,8829,9353,10211,10857,23022,23181,23768,57498,91624,120892,219699	EPHB3,GAP43,ITGB1,LAMB2,NCAM1,PRKG1,PTN,PTPRM,SDC2,SLIT3,NRP1,SLIT2,FLOT1,PGRMC1,PALLD,DIP2A,FLRT2,KIDINS220,NEXN,LRRK2,UNC5B	21/464
16_Member	GO Biological Processes	GO:0048667	cell morphogenesis involved in neuron differentiation	-8.31169	-6.03501	2049,2596,3688,3913,4684,5592,5764,5797,6383,6586,8829,9353,10211,10857,23022,23181,23768,57498,91624,219699	EPHB3,GAP43,ITGB1,LAMB2,NCAM1,PRKG1,PTN,PTPRM,SDC2,SLIT3,NRP1,SLIT2,FLOT1,PGRMC1,PALLD,DIP2A,FLRT2,KIDINS220,NEXN,UNC5B	20/423
16_Member	GO Biological Processes	GO:0120039	plasma membrane bounded cell projection morphogenesis	-8.28425	-6.0119	2049,2596,3688,3913,4684,5592,5764,5797,6383,6586,8829,9353,10211,10857,23022,23181,23768,57498,91624,120892,219699	EPHB3,GAP43,ITGB1,LAMB2,NCAM1,PRKG1,PTN,PTPRM,SDC2,SLIT3,NRP1,SLIT2,FLOT1,PGRMC1,PALLD,DIP2A,FLRT2,KIDINS220,NEXN,LRRK2,UNC5B	21/469
16_Member	GO Biological Processes	GO:0048858	cell projection morphogenesis	-8.20376	-5.93799	2049,2596,3688,3913,4684,5592,5764,5797,6383,6586,8829,9353,10211,10857,23022,23181,23768,57498,91624,120892,219699	EPHB3,GAP43,ITGB1,LAMB2,NCAM1,PRKG1,PTN,PTPRM,SDC2,SLIT3,NRP1,SLIT2,FLOT1,PGRMC1,PALLD,DIP2A,FLRT2,KIDINS220,NEXN,LRRK2,UNC5B	21/474
16_Member	GO Biological Processes	GO:0000904	cell morphogenesis involved in differentiation	-7.90738	-5.65574	2049,2195,2596,3688,3913,4684,5592,5764,5797,6383,6586,8829,9353,10211,10857,23022,23181,23768,57498,91624,219699	EPHB3,FAT1,GAP43,ITGB1,LAMB2,NCAM1,PRKG1,PTN,PTPRM,SDC2,SLIT3,NRP1,SLIT2,FLOT1,PGRMC1,PALLD,DIP2A,FLRT2,KIDINS220,NEXN,UNC5B	21/493
16_Member	GO Biological Processes	GO:0000902	cell morphogenesis	-7.75028	-5.52229	2049,2195,2596,3688,3694,3913,4684,5592,5764,5797,6383,6586,8829,9353,10211,10857,23022,23181,23768,26585,57498,91624,120892,219699	EPHB3,FAT1,GAP43,ITGB1,ITGB6,LAMB2,NCAM1,PRKG1,PTN,PTPRM,SDC2,SLIT3,NRP1,SLIT2,FLOT1,PGRMC1,PALLD,DIP2A,FLRT2,GREM1,KIDINS220,NEXN,LRRK2,UNC5B	24/651
16_Member	GO Biological Processes	GO:0006935	chemotaxis	-6.97207	-4.8514	2049,2596,3491,3913,4015,4684,5328,5337,5764,5797,6586,7412,8829,9353,10457,10857,23022,23768,91624,219699	EPHB3,GAP43,CCN1,LAMB2,LOX,NCAM1,PLAU,PLD1,PTN,PTPRM,SLIT3,VCAM1,NRP1,SLIT2,GPNMB,PGRMC1,PALLD,FLRT2,NEXN,UNC5B	20/510
16_Member	GO Biological Processes	GO:0042330	taxis	-6.94476	-4.82665	2049,2596,3491,3913,4015,4684,5328,5337,5764,5797,6586,7412,8829,9353,10457,10857,23022,23768,91624,219699	EPHB3,GAP43,CCN1,LAMB2,LOX,NCAM1,PLAU,PLD1,PTN,PTPRM,SLIT3,VCAM1,NRP1,SLIT2,GPNMB,PGRMC1,PALLD,FLRT2,NEXN,UNC5B	20/512
16_Member	GO Biological Processes	GO:0031175	neuron projection development	-6.89235	-4.78683	2049,2596,3371,3688,3913,4067,4684,5592,5764,5797,6383,6586,8829,9353,10211,10857,23022,23181,23768,57498,91624,120892,219699	EPHB3,GAP43,TNC,ITGB1,LAMB2,LYN,NCAM1,PRKG1,PTN,PTPRM,SDC2,SLIT3,NRP1,SLIT2,FLOT1,PGRMC1,PALLD,DIP2A,FLRT2,KIDINS220,NEXN,LRRK2,UNC5B	23/670
16_Member	GO Biological Processes	GO:0040011	locomotion	-6.70509	-4.6237	2049,2596,3491,3913,4015,4684,5328,5337,5764,5797,6586,7412,8829,9353,10457,10857,23022,23768,91624,219699	EPHB3,GAP43,CCN1,LAMB2,LOX,NCAM1,PLAU,PLD1,PTN,PTPRM,SLIT3,VCAM1,NRP1,SLIT2,GPNMB,PGRMC1,PALLD,FLRT2,NEXN,UNC5B	20/530
16_Member	GO Biological Processes	GO:0007411	axon guidance	-6.66748	-4.59768	2049,2596,3913,4684,5797,6586,8829,9353,10857,23022,23768,91624,219699	EPHB3,GAP43,LAMB2,NCAM1,PTPRM,SLIT3,NRP1,SLIT2,PGRMC1,PALLD,FLRT2,NEXN,UNC5B	13/221
16_Member	GO Biological Processes	GO:0097485	neuron projection guidance	-6.66748	-4.59768	2049,2596,3913,4684,5797,6586,8829,9353,10857,23022,23768,91624,219699	EPHB3,GAP43,LAMB2,NCAM1,PTPRM,SLIT3,NRP1,SLIT2,PGRMC1,PALLD,FLRT2,NEXN,UNC5B	13/221
16_Member	GO Biological Processes	GO:0007409	axonogenesis	-6.53003	-4.47814	2049,2596,3688,3913,4684,5592,5797,6586,8829,9353,10211,10857,23022,23768,91624,219699	EPHB3,GAP43,ITGB1,LAMB2,NCAM1,PRKG1,PTPRM,SLIT3,NRP1,SLIT2,FLOT1,PGRMC1,PALLD,FLRT2,NEXN,UNC5B	16/352
16_Member	GO Biological Processes	GO:0061564	axon development	-6.37161	-4.34543	2049,2596,3371,3688,3913,4684,5592,5797,6586,8829,9353,10211,10857,23022,23768,91624,219699	EPHB3,GAP43,TNC,ITGB1,LAMB2,NCAM1,PRKG1,PTPRM,SLIT3,NRP1,SLIT2,FLOT1,PGRMC1,PALLD,FLRT2,NEXN,UNC5B	17/408
16_Member	KEGG Pathway	hsa04360	Axon guidance	-4.99964	-3.19266	2049,3688,3983,6586,8829,9353,10398,84552,103910,219699	EPHB3,ITGB1,ABLIM1,SLIT3,NRP1,SLIT2,MYL9,PARD6G,MYL12B,UNC5B	10/182
16_Member	GO Biological Processes	GO:0008038	neuron recognition	-4.1374	-2.45065	2049,2596,8829,23022,91624	EPHB3,GAP43,NRP1,PALLD,NEXN	5/46
16_Member	GO Biological Processes	GO:0008037	cell recognition	-2.02943	-0.713488	2049,2596,8829,23022,91624	EPHB3,GAP43,NRP1,PALLD,NEXN	5/135
17_Summary	GO Biological Processes	GO:0007507	heart development	-11.9867	-9.38636	90,1280,1289,1301,1363,2274,2335,2535,3491,3688,4015,4629,6443,6444,6586,6604,7168,7412,8470,8829,9353,9645,9821,10395,10818,11117,23768,26585,30008	ACVR1,COL2A1,COL5A1,COL11A1,CPE,FHL2,FN1,FZD2,CCN1,ITGB1,LOX,MYH11,SGCB,SGCD,SLIT3,SMARCD3,TPM1,VCAM1,SORBS2,NRP1,SLIT2,MICAL2,RB1CC1,DLC1,FRS2,EMILIN1,FLRT2,GREM1,EFEMP2	29/-
17_Member	GO Biological Processes	GO:0007507	heart development	-11.9867	-9.38636	90,1280,1289,1301,1363,2274,2335,2535,3491,3688,4015,4629,6443,6444,6586,6604,7168,7412,8470,8829,9353,9645,9821,10395,10818,11117,23768,26585	ACVR1,COL2A1,COL5A1,COL11A1,CPE,FHL2,FN1,FZD2,CCN1,ITGB1,LOX,MYH11,SGCB,SGCD,SLIT3,SMARCD3,TPM1,VCAM1,SORBS2,NRP1,SLIT2,MICAL2,RB1CC1,DLC1,FRS2,EMILIN1,FLRT2,GREM1	28/562
17_Member	GO Biological Processes	GO:0003007	heart morphogenesis	-8.3763	-6.0922	90,1280,1289,1301,1363,2274,2535,3491,6586,6604,7168,8829,9353,9645,10395,23768	ACVR1,COL2A1,COL5A1,COL11A1,CPE,FHL2,FZD2,CCN1,SLIT3,SMARCD3,TPM1,NRP1,SLIT2,MICAL2,DLC1,FLRT2	16/259
17_Member	GO Biological Processes	GO:0003206	cardiac chamber morphogenesis	-7.42463	-5.23141	90,1301,1363,2274,2535,3491,6586,6604,7168,8829,9353	ACVR1,COL11A1,CPE,FHL2,FZD2,CCN1,SLIT3,SMARCD3,TPM1,NRP1,SLIT2	11/127
17_Member	GO Biological Processes	GO:0003205	cardiac chamber development	-7.13993	-5.00356	90,1301,1363,2274,2535,3491,6586,6604,7168,8829,9353,10818	ACVR1,COL11A1,CPE,FHL2,FZD2,CCN1,SLIT3,SMARCD3,TPM1,NRP1,SLIT2,FRS2	12/167
17_Member	GO Biological Processes	GO:0003231	cardiac ventricle development	-6.41317	-4.37424	90,1301,1363,2535,3491,6586,6604,7168,9353,10818	ACVR1,COL11A1,CPE,FZD2,CCN1,SLIT3,SMARCD3,TPM1,SLIT2,FRS2	10/127
17_Member	GO Biological Processes	GO:0003208	cardiac ventricle morphogenesis	-2.3344	-0.968663	1301,1363,6604,7168	COL11A1,CPE,SMARCD3,TPM1	4/71
17_Member	GO Biological Processes	GO:0060415	muscle tissue morphogenesis	-2.27052	-0.916277	1301,2535,7168,30008	COL11A1,FZD2,TPM1,EFEMP2	4/74
17_Member	GO Biological Processes	GO:0048644	muscle organ morphogenesis	-2.13262	-0.797743	1301,2535,7168,30008	COL11A1,FZD2,TPM1,EFEMP2	4/81
18_Summary	GO Biological Processes	GO:0061061	muscle structure development	-11.4592	-8.88148	58,90,857,858,1301,1465,1674,2273,2274,2535,3688,4015,4629,6443,6444,6525,6604,6876,7026,7168,8470,10398,22801,25802,26585,30008,7763,7412	ACTA1,ACVR1,CAV1,CAV2,COL11A1,CSRP1,DES,FHL1,FHL2,FZD2,ITGB1,LOX,MYH11,SGCB,SGCD,SMTN,SMARCD3,TAGLN,NR2F2,TPM1,SORBS2,MYL9,ITGA11,LMOD1,GREM1,EFEMP2,ZFAND5,VCAM1	28/-
18_Member	GO Biological Processes	GO:0061061	muscle structure development	-11.4592	-8.88148	58,90,857,858,1301,1465,1674,2273,2274,2535,3688,4015,4629,6443,6444,6525,6604,6876,7026,7168,8470,10398,22801,25802,26585,30008	ACTA1,ACVR1,CAV1,CAV2,COL11A1,CSRP1,DES,FHL1,FHL2,FZD2,ITGB1,LOX,MYH11,SGCB,SGCD,SMTN,SMARCD3,TAGLN,NR2F2,TPM1,SORBS2,MYL9,ITGA11,LMOD1,GREM1,EFEMP2	26/506
18_Member	GO Biological Processes	GO:0055001	muscle cell development	-9.10459	-6.76036	58,858,1465,2274,3688,4015,4629,6443,6444,7168,8470,10398,25802,30008	ACTA1,CAV2,CSRP1,FHL2,ITGB1,LOX,MYH11,SGCB,SGCD,TPM1,SORBS2,MYL9,LMOD1,EFEMP2	14/167
18_Member	GO Biological Processes	GO:0042692	muscle cell differentiation	-8.86901	-6.55387	58,90,858,1465,2274,3688,4015,4629,6443,6444,6604,7168,8470,10398,25802,26585,30008	ACTA1,ACVR1,CAV2,CSRP1,FHL2,ITGB1,LOX,MYH11,SGCB,SGCD,SMARCD3,TPM1,SORBS2,MYL9,LMOD1,GREM1,EFEMP2	17/275
18_Member	GO Biological Processes	GO:0051146	striated muscle cell differentiation	-7.79165	-5.55368	58,90,858,1465,2274,3688,4629,6443,6444,7168,8470,10398,25802,26585	ACTA1,ACVR1,CAV2,CSRP1,FHL2,ITGB1,MYH11,SGCB,SGCD,TPM1,SORBS2,MYL9,LMOD1,GREM1	14/211
18_Member	GO Biological Processes	GO:0060537	muscle tissue development	-7.57311	-5.36403	58,90,857,858,1301,1465,2274,3688,4629,6443,6444,7026,7168,7763,8470,26585,30008	ACTA1,ACVR1,CAV1,CAV2,COL11A1,CSRP1,FHL2,ITGB1,MYH11,SGCB,SGCD,NR2F2,TPM1,ZFAND5,SORBS2,GREM1,EFEMP2	17/336
18_Member	GO Biological Processes	GO:0007517	muscle organ development	-7.29916	-5.14093	58,857,858,1301,1674,2273,2535,3688,6443,6444,6525,6876,7026,7168,22801,30008	ACTA1,CAV1,CAV2,COL11A1,DES,FHL1,FZD2,ITGB1,SGCB,SGCD,SMTN,TAGLN,NR2F2,TPM1,ITGA11,EFEMP2	16/309
18_Member	GO Biological Processes	GO:0035051	cardiocyte differentiation	-5.59191	-3.69051	90,2274,3688,4629,6443,6444,7412,8470,26585	ACVR1,FHL2,ITGB1,MYH11,SGCB,SGCD,VCAM1,SORBS2,GREM1	9/122
18_Member	GO Biological Processes	GO:0055007	cardiac muscle cell differentiation	-5.56622	-3.67403	90,2274,3688,4629,6443,6444,8470,26585	ACVR1,FHL2,ITGB1,MYH11,SGCB,SGCD,SORBS2,GREM1	8/92
18_Member	GO Biological Processes	GO:0048738	cardiac muscle tissue development	-4.87676	-3.08329	90,1301,2274,3688,4629,6443,6444,7168,8470,26585	ACVR1,COL11A1,FHL2,ITGB1,MYH11,SGCB,SGCD,TPM1,SORBS2,GREM1	10/188
18_Member	GO Biological Processes	GO:0014706	striated muscle tissue development	-4.75852	-2.9863	90,1301,2274,3688,4629,6443,6444,7168,8470,26585	ACVR1,COL11A1,FHL2,ITGB1,MYH11,SGCB,SGCD,TPM1,SORBS2,GREM1	10/194
18_Member	GO Biological Processes	GO:0055013	cardiac muscle cell development	-3.38999	-1.83453	2274,4629,6443,6444,8470	FHL2,MYH11,SGCB,SGCD,SORBS2	5/66
18_Member	GO Biological Processes	GO:0055006	cardiac cell development	-3.18782	-1.66143	2274,4629,6443,6444,8470	FHL2,MYH11,SGCB,SGCD,SORBS2	5/73
19_Summary	GO Biological Processes	GO:0009725	response to hormone	-11.2723	-8.71609	2,58,90,857,858,1277,1435,1490,1601,2274,2650,3162,3490,3667,4015,4067,4323,5743,6443,6586,6696,7035,7043,7057,7077,7078,8611,9353,10580,23433,94056,261729,2535,3491,8829,10818,558,5764,598,7026,11117,3371,22836,1893,345611,3983,219699,8863,11245,23768	A2M,ACTA1,ACVR1,CAV1,CAV2,COL1A1,CSF1,CCN2,DAB2,FHL2,GCNT1,HMOX1,IGFBP7,IRS1,LOX,LYN,MMP14,PTGS2,SGCB,SLIT3,SPP1,TFPI,TGFB3,THBS1,TIMP2,TIMP3,PLPP1,SLIT2,SORBS1,RHOQ,SYAP1,STEAP2,FZD2,CCN1,NRP1,FRS2,AXL,PTN,BCL2L1,NR2F2,EMILIN1,TNC,RHOBTB3,ECM1,IRGM,ABLIM1,UNC5B,PER3,GPR176,FLRT2	50/-
19_Member	GO Biological Processes	GO:0009725	response to hormone	-11.2723	-8.71609	2,58,90,857,858,1277,1435,1490,1601,2274,2650,3162,3490,3667,4015,4067,4323,5743,6443,6586,6696,7035,7043,7057,7077,7078,8611,9353,10580,23433,94056,261729	A2M,ACTA1,ACVR1,CAV1,CAV2,COL1A1,CSF1,CCN2,DAB2,FHL2,GCNT1,HMOX1,IGFBP7,IRS1,LOX,LYN,MMP14,PTGS2,SGCB,SLIT3,SPP1,TFPI,TGFB3,THBS1,TIMP2,TIMP3,PLPP1,SLIT2,SORBS1,RHOQ,SYAP1,STEAP2	32/788
19_Member	GO Biological Processes	GO:0048545	response to steroid hormone	-8.56557	-6.26234	2,58,90,857,1277,1490,1601,3490,4015,5743,6586,6696,7035,7043,7057,8611,9353	A2M,ACTA1,ACVR1,CAV1,COL1A1,CCN2,DAB2,IGFBP7,LOX,PTGS2,SLIT3,SPP1,TFPI,TGFB3,THBS1,PLPP1,SLIT2	17/288
19_Member	GO Biological Processes	GO:0051414	response to cortisol	-5.08346	-3.26124	3490,6586,9353	IGFBP7,SLIT3,SLIT2	3/5
19_Member	GO Biological Processes	GO:0060411	cardiac septum morphogenesis	-4.2019	-2.50655	90,2535,3491,6586,8829,9353	ACVR1,FZD2,CCN1,SLIT3,NRP1,SLIT2	6/72
19_Member	GO Biological Processes	GO:0003279	cardiac septum development	-4.1357	-2.44992	90,2535,3491,6586,8829,9353,10818	ACVR1,FZD2,CCN1,SLIT3,NRP1,SLIT2,FRS2	7/107
19_Member	GO Biological Processes	GO:0003281	ventricular septum development	-4.13478	-2.44992	90,2535,3491,6586,9353,10818	ACVR1,FZD2,CCN1,SLIT3,SLIT2,FRS2	6/74
19_Member	GO Biological Processes	GO:0042698	ovulation cycle	-4.102	-2.42461	2,558,5764,6586,7043,9353	A2M,AXL,PTN,SLIT3,TGFB3,SLIT2	6/75
19_Member	GO Biological Processes	GO:0046660	female sex differentiation	-3.91462	-2.27021	2,558,598,4323,6586,7026,9353	A2M,AXL,BCL2L1,MMP14,SLIT3,NR2F2,SLIT2	7/116
19_Member	GO Biological Processes	GO:1901654	response to ketone	-3.80497	-2.17823	2,598,857,3490,6586,6696,7043,7057,9353	A2M,BCL2L1,CAV1,IGFBP7,SLIT3,SPP1,TGFB3,THBS1,SLIT2	9/205
19_Member	GO Biological Processes	GO:0031960	response to corticosteroid	-3.7152	-2.10701	2,90,1277,1490,3490,5743,6586,9353	A2M,ACVR1,COL1A1,CCN2,IGFBP7,PTGS2,SLIT3,SLIT2	8/166
19_Member	GO Biological Processes	GO:0003179	heart valve morphogenesis	-3.55005	-1.96567	90,3491,6586,9353,11117	ACVR1,CCN1,SLIT3,SLIT2,EMILIN1	5/61
19_Member	GO Biological Processes	GO:0008585	female gonad development	-3.48637	-1.90879	2,598,4323,6586,7026,9353	A2M,BCL2L1,MMP14,SLIT3,NR2F2,SLIT2	6/97
19_Member	GO Biological Processes	GO:0046545	development of primary female sexual characteristics	-3.39196	-1.83579	2,598,4323,6586,7026,9353	A2M,BCL2L1,MMP14,SLIT3,NR2F2,SLIT2	6/101
19_Member	GO Biological Processes	GO:0048608	reproductive structure development	-3.25261	-1.71361	2,558,598,3371,4323,6586,7026,9353,10818,22836	A2M,AXL,BCL2L1,TNC,MMP14,SLIT3,NR2F2,SLIT2,FRS2,RHOBTB3	10/296
19_Member	GO Biological Processes	GO:0003170	heart valve development	-3.21531	-1.68365	90,3491,6586,9353,11117	ACVR1,CCN1,SLIT3,SLIT2,EMILIN1	5/72
19_Member	GO Biological Processes	GO:0061458	reproductive system development	-3.20766	-1.68062	2,558,598,3371,4323,6586,7026,9353,10818,22836	A2M,AXL,BCL2L1,TNC,MMP14,SLIT3,NR2F2,SLIT2,FRS2,RHOBTB3	10/300
19_Member	GO Biological Processes	GO:0060412	ventricular septum morphogenesis	-3.14093	-1.62311	90,2535,6586,9353	ACVR1,FZD2,SLIT3,SLIT2	4/43
19_Member	GO Biological Processes	GO:0001959	regulation of cytokine-mediated signaling pathway	-2.94377	-1.46969	558,857,1435,1893,6586,9353,345611	AXL,CAV1,CSF1,ECM1,SLIT3,SLIT2,IRGM	7/168
19_Member	Reactome Gene Sets	R-HSA-373752	Netrin-1 signaling	-2.89247	-1.42472	3983,6586,9353,219699	ABLIM1,SLIT3,SLIT2,UNC5B	4/50
19_Member	GO Biological Processes	GO:0022602	ovulation cycle process	-2.82865	-1.3744	2,6586,7043,9353	A2M,SLIT3,TGFB3,SLIT2	4/52
19_Member	GO Biological Processes	GO:0060759	regulation of response to cytokine stimulus	-2.77173	-1.32735	558,857,1435,1893,6586,9353,345611	AXL,CAV1,CSF1,ECM1,SLIT3,SLIT2,IRGM	7/180
19_Member	GO Biological Processes	GO:0003181	atrioventricular valve morphogenesis	-2.73238	-1.29869	90,3491,6586	ACVR1,CCN1,SLIT3	3/26
19_Member	GO Biological Processes	GO:0051384	response to glucocorticoid	-2.62429	-1.21175	2,90,3490,5743,6586,9353	A2M,ACVR1,IGFBP7,PTGS2,SLIT3,SLIT2	6/142
19_Member	GO Biological Processes	GO:0003171	atrioventricular valve development	-2.59366	-1.18859	90,3491,6586	ACVR1,CCN1,SLIT3	3/29
19_Member	GO Biological Processes	GO:1902742	apoptotic process involved in development	-2.35863	-0.989621	3491,6586,9353	CCN1,SLIT3,SLIT2	3/35
19_Member	GO Biological Processes	GO:0048511	rhythmic process	-2.27563	-0.919622	2,558,5764,6586,7043,8863,9353,11245	A2M,AXL,PTN,SLIT3,TGFB3,PER3,SLIT2,GPR176	8/279
19_Member	GO Biological Processes	GO:0003180	aortic valve morphogenesis	-2.25744	-0.905825	6586,9353,11117	SLIT3,SLIT2,EMILIN1	3/38
19_Member	GO Biological Processes	GO:0007548	sex differentiation	-2.23942	-0.888685	2,558,598,4323,6586,7026,9353,22836	A2M,AXL,BCL2L1,MMP14,SLIT3,NR2F2,SLIT2,RHOBTB3	8/283
19_Member	GO Biological Processes	GO:0008406	gonad development	-2.21725	-0.870856	2,598,4323,6586,7026,9353,22836	A2M,BCL2L1,MMP14,SLIT3,NR2F2,SLIT2,RHOBTB3	7/227
19_Member	GO Biological Processes	GO:0045137	development of primary sexual characteristics	-2.16725	-0.826302	2,598,4323,6586,7026,9353,22836	A2M,BCL2L1,MMP14,SLIT3,NR2F2,SLIT2,RHOBTB3	7/232
19_Member	GO Biological Processes	GO:0003176	aortic valve development	-2.10726	-0.775737	6586,9353,11117	SLIT3,SLIT2,EMILIN1	3/43
19_Member	GO Biological Processes	GO:0050919	negative chemotaxis	-2.02634	-0.712108	6586,9353,23768	SLIT3,SLIT2,FLRT2	3/46
19_Member	GO Biological Processes	GO:0001960	negative regulation of cytokine-mediated signaling pathway	-2.02524	-0.712108	857,1893,6586,9353	CAV1,ECM1,SLIT3,SLIT2	4/87
19_Member	GO Biological Processes	GO:1905314	semi-lunar valve development	-2.0007	-0.69274	6586,9353,11117	SLIT3,SLIT2,EMILIN1	3/47
20_Summary	GO Biological Processes	GO:1903034	regulation of response to wounding	-10.9704	-8.42806	857,2149,2152,3688,5054,5328,5592,5764,6696,7035,7056,7057,8840,11117,84034,90102,2,4067,5045,5654,5740,8829,9353,26585,80762,345611,721,30008,5621,120892,4323,3694	CAV1,F2R,F3,ITGB1,SERPINE1,PLAU,PRKG1,PTN,SPP1,TFPI,THBD,THBS1,CCN4,EMILIN1,EMILIN2,PHLDB2,A2M,LYN,FURIN,HTRA1,PTGIS,NRP1,SLIT2,GREM1,NDFIP1,IRGM,C4B,EFEMP2,PRNP,LRRK2,MMP14,ITGB6	32/-
20_Member	GO Biological Processes	GO:1903034	regulation of response to wounding	-10.9704	-8.42806	857,2149,2152,3688,5054,5328,5592,5764,6696,7035,7056,7057,8840,11117,84034,90102	CAV1,F2R,F3,ITGB1,SERPINE1,PLAU,PRKG1,PTN,SPP1,TFPI,THBD,THBS1,CCN4,EMILIN1,EMILIN2,PHLDB2	16/173
20_Member	GO Biological Processes	GO:0030193	regulation of blood coagulation	-10.3005	-7.81187	857,2149,2152,5054,5328,5592,7035,7056,7057,11117,84034	CAV1,F2R,F3,SERPINE1,PLAU,PRKG1,TFPI,THBD,THBS1,EMILIN1,EMILIN2	11/69
20_Member	GO Biological Processes	GO:0061041	regulation of wound healing	-10.2971	-7.81187	857,2149,2152,3688,5054,5328,5592,7035,7056,7057,8840,11117,84034,90102	CAV1,F2R,F3,ITGB1,SERPINE1,PLAU,PRKG1,TFPI,THBD,THBS1,CCN4,EMILIN1,EMILIN2,PHLDB2	14/136
20_Member	GO Biological Processes	GO:1900046	regulation of hemostasis	-10.1604	-7.69269	857,2149,2152,5054,5328,5592,7035,7056,7057,11117,84034	CAV1,F2R,F3,SERPINE1,PLAU,PRKG1,TFPI,THBD,THBS1,EMILIN1,EMILIN2	11/71
20_Member	GO Biological Processes	GO:0050818	regulation of coagulation	-9.95849	-7.51303	857,2149,2152,5054,5328,5592,7035,7056,7057,11117,84034	CAV1,F2R,F3,SERPINE1,PLAU,PRKG1,TFPI,THBD,THBS1,EMILIN1,EMILIN2	11/74
20_Member	GO Biological Processes	GO:1903036	positive regulation of response to wounding	-9.82897	-7.39949	2149,2152,3688,5054,5328,5764,7056,7057,8840,11117,84034	F2R,F3,ITGB1,SERPINE1,PLAU,PTN,THBD,THBS1,CCN4,EMILIN1,EMILIN2	11/76
20_Member	GO Biological Processes	GO:0030194	positive regulation of blood coagulation	-9.81541	-7.39627	2149,2152,5054,5328,7056,7057,11117,84034	F2R,F3,SERPINE1,PLAU,THBD,THBS1,EMILIN1,EMILIN2	8/28
20_Member	GO Biological Processes	GO:1900048	positive regulation of hemostasis	-9.81541	-7.39627	2149,2152,5054,5328,7056,7057,11117,84034	F2R,F3,SERPINE1,PLAU,THBD,THBS1,EMILIN1,EMILIN2	8/28
20_Member	GO Biological Processes	GO:0050820	positive regulation of coagulation	-9.54765	-7.15334	2149,2152,5054,5328,7056,7057,11117,84034	F2R,F3,SERPINE1,PLAU,THBD,THBS1,EMILIN1,EMILIN2	8/30
20_Member	GO Biological Processes	GO:0090303	positive regulation of wound healing	-9.4677	-7.07819	2149,2152,3688,5054,5328,7056,7057,8840,11117,84034	F2R,F3,ITGB1,SERPINE1,PLAU,THBD,THBS1,CCN4,EMILIN1,EMILIN2	10/62
20_Member	GO Biological Processes	GO:0032102	negative regulation of response to external stimulus	-6.24803	-4.24131	2,4067,5045,5054,5328,5592,5654,5740,6696,7035,7056,7057,8829,9353,26585,80762,90102,345611	A2M,LYN,FURIN,SERPINE1,PLAU,PRKG1,HTRA1,PTGIS,SPP1,TFPI,THBD,THBS1,NRP1,SLIT2,GREM1,NDFIP1,PHLDB2,IRGM	18/465
20_Member	WikiPathways	WP558	Complement and coagulation cascades	-5.90273	-3.95558	721,2149,2152,5054,5328,7035,7056	C4B,F2R,F3,SERPINE1,PLAU,TFPI,THBD	7/58
20_Member	KEGG Pathway	hsa04610	Complement and coagulation cascades	-5.78907	-3.85881	2,721,2149,2152,5054,5328,7035,7056	A2M,C4B,F2R,F3,SERPINE1,PLAU,TFPI,THBD	8/86
20_Member	GO Biological Processes	GO:2000097	regulation of smooth muscle cell-matrix adhesion	-5.47834	-3.59813	5054,5328,30008	SERPINE1,PLAU,EFEMP2	3/4
20_Member	GO Biological Processes	GO:0051918	negative regulation of fibrinolysis	-5.28108	-3.43221	5054,5328,7056,7057	SERPINE1,PLAU,THBD,THBS1	4/13
20_Member	GO Biological Processes	GO:0010955	negative regulation of protein processing	-5.14268	-3.31516	5054,5328,5621,7057,120892	SERPINE1,PLAU,PRNP,THBS1,LRRK2	5/29
20_Member	GO Biological Processes	GO:1903318	negative regulation of protein maturation	-5.14268	-3.31516	5054,5328,5621,7057,120892	SERPINE1,PLAU,PRNP,THBS1,LRRK2	5/29
20_Member	GO Biological Processes	GO:0051917	regulation of fibrinolysis	-4.66588	-2.90727	5054,5328,7056,7057	SERPINE1,PLAU,THBD,THBS1	4/18
20_Member	GO Biological Processes	GO:1903035	negative regulation of response to wounding	-4.52664	-2.79686	5054,5328,5592,6696,7035,7056,90102	SERPINE1,PLAU,PRKG1,SPP1,TFPI,THBD,PHLDB2	7/93
20_Member	Reactome Gene Sets	R-HSA-140877	Formation of Fibrin Clot (Clotting Cascade)	-4.49066	-2.76328	2,2149,2152,7035,7056	A2M,F2R,F3,TFPI,THBD	5/39
20_Member	GO Biological Processes	GO:0070613	regulation of protein processing	-4.41675	-2.69453	4323,5054,5328,5621,7057,120892	MMP14,SERPINE1,PLAU,PRNP,THBS1,LRRK2	6/66
20_Member	GO Biological Processes	GO:0010757	negative regulation of plasminogen activation	-4.34444	-2.63036	5054,5328,7057	SERPINE1,PLAU,THBS1	3/8
20_Member	GO Biological Processes	GO:1903317	regulation of protein maturation	-4.27118	-2.56804	4323,5054,5328,5621,7057,120892	MMP14,SERPINE1,PLAU,PRNP,THBS1,LRRK2	6/70
20_Member	GO Biological Processes	GO:0030195	negative regulation of blood coagulation	-4.18402	-2.4906	5054,5328,5592,7035,7056	SERPINE1,PLAU,PRKG1,TFPI,THBD	5/45
20_Member	GO Biological Processes	GO:0061045	negative regulation of wound healing	-4.16808	-2.47658	5054,5328,5592,7035,7056,90102	SERPINE1,PLAU,PRKG1,TFPI,THBD,PHLDB2	6/73
20_Member	GO Biological Processes	GO:1900047	negative regulation of hemostasis	-4.1374	-2.45065	5054,5328,5592,7035,7056	SERPINE1,PLAU,PRKG1,TFPI,THBD	5/46
20_Member	GO Biological Processes	GO:0050819	negative regulation of coagulation	-4.00408	-2.34537	5054,5328,5592,7035,7056	SERPINE1,PLAU,PRKG1,TFPI,THBD	5/49
20_Member	GO Biological Processes	GO:0010755	regulation of plasminogen activation	-3.21139	-1.68304	5054,5328,7057	SERPINE1,PLAU,THBS1	3/18
20_Member	WikiPathways	WP272	Blood clotting cascade	-2.94771	-1.47247	2152,5054,5328	F3,SERPINE1,PLAU	3/22
20_Member	WikiPathways	WP560	TGF-beta receptor signaling	-2.73796	-1.30056	3694,5054,6696,7057	ITGB6,SERPINE1,SPP1,THBS1	4/55
20_Member	WikiPathways	WP4816	TGF-beta receptor signaling in skeletal dysplasias	-2.62546	-1.2119	3694,5054,6696,7057	ITGB6,SERPINE1,SPP1,THBS1	4/59

## Sheet: Δ9_D3_D0_total
GroupID	Category	Term	Description	LogP	Log(q-value)	Genes	Symbols	InTerm_InList
1_Summary	Canonical Pathways	M18	PID INTEGRIN1 PATHWAY	-13.8784	-9.52979	1280,1287,1289,1301,1302,1464,3680,3688,4192,5328,6696,7052,7057,7412,22801,93185,284217,634,999,1303,1605,1634,2202,3691,3791,4015,4237,5045,5054,5340,10516,26577,50848,84695,14,558,1445,1845,2152,2324,2670,4609,5156,5438,5519,5603,5795,5803,6654,6776,7410,7867,10253,10458,23768,3725,5599,10298,10398,103910,3055,1435,1978,2149,55844,6850,5606,10580,3661,5743,8717	COL2A1,COL4A5,COL5A1,COL11A1,COL11A2,CSPG4,ITGA9,ITGB1,MDK,PLAU,SPP1,TGM2,THBS1,VCAM1,ITGA11,IGSF8,LAMA1,CEACAM1,CDH1,COL12A1,DAG1,DCN,EFEMP1,ITGB4,KDR,LOX,MFAP2,FURIN,SERPINE1,PLG,FBLN5,PCOLCE2,F11R,LOXL3,AAMP,AXL,CSK,DUSP3,F3,FLT4,GFAP,MYC,PDGFRA,POLR2I,PPP2R1B,MAPK13,PTPRJ,PTPRZ1,SOS1,STAT5A,VAV2,MAPKAPK3,SPRY2,BAIAP2,FLRT2,JUN,MAPK8,PAK4,MYL9,MYL12B,HCK,CSF1,EIF4EBP1,F2R,PPP2R2D,SYK,MAP2K3,SO…	71/-
1_Member	Canonical Pathways	M18	PID INTEGRIN1 PATHWAY	-13.8784	-9.52979	1280,1287,1289,1301,1302,1464,3680,3688,4192,5328,6696,7052,7057,7412,22801,93185,284217	COL2A1,COL4A5,COL5A1,COL11A1,COL11A2,CSPG4,ITGA9,ITGB1,MDK,PLAU,SPP1,TGM2,THBS1,VCAM1,ITGA11,IGSF8,LAMA1	17/66
1_Member	Reactome Gene Sets	R-HSA-1474244	Extracellular matrix organization	-11.3281	-7.45668	634,999,1280,1287,1289,1301,1302,1303,1605,1634,2202,3680,3688,3691,3791,4015,4237,5045,5054,5340,6696,7057,7412,10516,22801,26577,50848,84695,284217	CEACAM1,CDH1,COL2A1,COL4A5,COL5A1,COL11A1,COL11A2,COL12A1,DAG1,DCN,EFEMP1,ITGA9,ITGB1,ITGB4,KDR,LOX,MFAP2,FURIN,SERPINE1,PLG,SPP1,THBS1,VCAM1,FBLN5,ITGA11,PCOLCE2,F11R,LOXL3,LAMA1	29/300
1_Member	Reactome Gene Sets	R-HSA-9006934	Signaling by Receptor Tyrosine Kinases	-8.46558	-5.51496	14,558,1280,1287,1289,1301,1302,1445,1845,2152,2324,2670,3688,3791,4192,4609,5045,5156,5340,5438,5519,5603,5795,5803,6654,6696,6776,7057,7410,7867,10253,10458,23768,284217	AAMP,AXL,COL2A1,COL4A5,COL5A1,COL11A1,COL11A2,CSK,DUSP3,F3,FLT4,GFAP,ITGB1,KDR,MDK,MYC,FURIN,PDGFRA,PLG,POLR2I,PPP2R1B,MAPK13,PTPRJ,PTPRZ1,SOS1,SPP1,STAT5A,THBS1,VAV2,MAPKAPK3,SPRY2,BAIAP2,FLRT2,LAMA1	34/524
1_Member	KEGG Pathway	hsa04510	Focal adhesion	-7.41345	-4.7181	1280,1287,2324,3680,3688,3691,3725,3791,5156,5599,6654,6696,7057,7410,10298,10398,22801,103910,284217	COL2A1,COL4A5,FLT4,ITGA9,ITGB1,ITGB4,JUN,KDR,PDGFRA,MAPK8,SOS1,SPP1,THBS1,VAV2,PAK4,MYL9,ITGA11,MYL12B,LAMA1	19/203
1_Member	WikiPathways	WP306	Focal adhesion	-6.86468	-4.28697	1280,3055,3680,3688,3691,3725,3791,5156,5599,6654,6696,7057,7410,10298,10398,22801,103910,284217	COL2A1,HCK,ITGA9,ITGB1,ITGB4,JUN,KDR,PDGFRA,MAPK8,SOS1,SPP1,THBS1,VAV2,PAK4,MYL9,ITGA11,MYL12B,LAMA1	18/198
1_Member	Reactome Gene Sets	R-HSA-216083	Integrin cell surface interactions	-6.83042	-4.26719	999,1280,1287,1289,3680,3688,3791,6696,7057,7412,22801,50848	CDH1,COL2A1,COL4A5,COL5A1,ITGA9,ITGB1,KDR,SPP1,THBS1,VCAM1,ITGA11,F11R	12/85
1_Member	Reactome Gene Sets	R-HSA-186797	Signaling by PDGF	-6.62595	-4.1099	1280,1287,1289,5045,5156,5340,6654,6696,6776,7057	COL2A1,COL4A5,COL5A1,FURIN,PDGFRA,PLG,SOS1,SPP1,STAT5A,THBS1	10/58
1_Member	WikiPathways	WP3932	Focal adhesion: PI3K-Akt-mTOR-signaling pathway	-5.36581	-3.14435	1280,1289,1301,1302,1435,1978,2149,2324,3680,3688,3691,3791,5156,5519,6654,6696,7057,22801,55844,284217	COL2A1,COL5A1,COL11A1,COL11A2,CSF1,EIF4EBP1,F2R,FLT4,ITGA9,ITGB1,ITGB4,KDR,PDGFRA,PPP2R1B,SOS1,SPP1,THBS1,ITGA11,PPP2R2D,LAMA1	20/302
1_Member	KEGG Pathway	hsa04512	ECM-receptor interaction	-4.92525	-2.81012	1280,1287,1605,3680,3688,3691,6696,7057,22801,284217	COL2A1,COL4A5,DAG1,ITGA9,ITGB1,ITGB4,SPP1,THBS1,ITGA11,LAMA1	10/88
1_Member	Reactome Gene Sets	R-HSA-3000178	ECM proteoglycans	-4.63498	-2.56649	1280,1287,1289,1605,1634,3680,3688,5054,284217	COL2A1,COL4A5,COL5A1,DAG1,DCN,ITGA9,ITGB1,SERPINE1,LAMA1	9/76
1_Member	WikiPathways	WP4172	PI3K-Akt signaling pathway	-4.63158	-2.56632	1280,1287,1435,1978,2149,2324,3680,3688,3691,3791,4609,5156,5519,6654,6696,6850,7057,22801,55844,284217	COL2A1,COL4A5,CSF1,EIF4EBP1,F2R,FLT4,ITGA9,ITGB1,ITGB4,KDR,MYC,PDGFRA,PPP2R1B,SOS1,SPP1,SYK,THBS1,ITGA11,PPP2R2D,LAMA1	20/339
1_Member	KEGG Pathway	hsa04151	PI3K-Akt signaling pathway	-4.36656	-2.3847	1280,1287,1435,1978,2149,2324,3680,3688,3691,3791,4609,5156,5519,6654,6696,6850,7057,22801,55844,284217	COL2A1,COL4A5,CSF1,EIF4EBP1,F2R,FLT4,ITGA9,ITGB1,ITGB4,KDR,MYC,PDGFRA,PPP2R1B,SOS1,SPP1,SYK,THBS1,ITGA11,PPP2R2D,LAMA1	20/354
1_Member	WikiPathways	WP185	Integrin-mediated cell adhesion	-4.36128	-2.38193	1445,3680,3688,3691,5606,6654,7410,10298,10580,22801	CSK,ITGA9,ITGB1,ITGB4,MAP2K3,SOS1,VAV2,PAK4,SORBS1,ITGA11	10/102
1_Member	KEGG Pathway	hsa05165	Human papillomavirus infection	-2.88399	-1.3576	1280,1287,1978,3661,3680,3688,3691,5519,5743,6654,6696,7057,8717,22801,55844,284217	COL2A1,COL4A5,EIF4EBP1,IRF3,ITGA9,ITGB1,ITGB4,PPP2R1B,PTGS2,SOS1,SPP1,THBS1,TRADD,ITGA11,PPP2R2D,LAMA1	16/331
1_Member	KEGG Pathway	hsa04810	Regulation of actin cytoskeleton	-2.57961	-1.14381	2149,3680,3688,3691,5156,6654,7410,10298,10398,10458,22801,103910	F2R,ITGA9,ITGB1,ITGB4,PDGFRA,SOS1,VAV2,PAK4,MYL9,BAIAP2,ITGA11,MYL12B	12/229
2_Summary	GO Biological Processes	GO:0097435	supramolecular fiber organization	-12.7436	-8.69611	58,302,408,800,1280,1289,1301,1302,1303,1832,2670,3688,3854,3855,3860,3861,3868,4015,4542,5045,5156,7018,7168,7169,7428,7431,10398,10458,10516,10580,11075,22902,25802,29767,29904,51673,54509,55971,57477,57580,79778,84695,116985,301,1525,6444,6525,10630,23171,23370,23384,23647,50848,57381	ACTA1,ANXA2,ARRB1,CALD1,COL2A1,COL5A1,COL11A1,COL11A2,COL12A1,DSP,GFAP,ITGB1,KRT6B,KRT7,KRT13,KRT14,KRT16,LOX,MYO1F,FURIN,PDGFRA,TF,TPM1,TPM2,VHL,VIM,MYL9,BAIAP2,FBLN5,SORBS1,STMN2,RUFY3,LMOD1,TMOD2,EEF2K,TPPP3,RHOF,BAIAP2L1,SHROOM4,PREX1,MICALL2,LOXL3,ARAP1,ANXA1,CXADR,SGCD,SMTN,PDPN,GPD1L,ARHGEF18,SPECC1L,ARFIP2,F11R,RHOJ	54/-
2_Member	GO Biological Processes	GO:0097435	supramolecular fiber organization	-12.7436	-8.69611	58,302,408,800,1280,1289,1301,1302,1303,1832,2670,3688,3854,3855,3860,3861,3868,4015,4542,5045,5156,7018,7168,7169,7428,7431,10398,10458,10516,10580,11075,22902,25802,29767,29904,51673,54509,55971,57477,57580,79778,84695,116985	ACTA1,ANXA2,ARRB1,CALD1,COL2A1,COL5A1,COL11A1,COL11A2,COL12A1,DSP,GFAP,ITGB1,KRT6B,KRT7,KRT13,KRT14,KRT16,LOX,MYO1F,FURIN,PDGFRA,TF,TPM1,TPM2,VHL,VIM,MYL9,BAIAP2,FBLN5,SORBS1,STMN2,RUFY3,LMOD1,TMOD2,EEF2K,TPPP3,RHOF,BAIAP2L1,SHROOM4,PREX1,MICALL2,LOXL3,ARAP1	43/569
2_Member	GO Biological Processes	GO:0030029	actin filament-based process	-6.59302	-4.08956	58,301,408,800,1525,3688,4542,5156,6444,6525,7018,7168,7169,10398,10458,10580,10630,22902,23171,23370,23384,23647,25802,29767,29904,50848,54509,55971,57381,57477,57580,79778,116985	ACTA1,ANXA1,ARRB1,CALD1,CXADR,ITGB1,MYO1F,PDGFRA,SGCD,SMTN,TF,TPM1,TPM2,MYL9,BAIAP2,SORBS1,PDPN,RUFY3,GPD1L,ARHGEF18,SPECC1L,ARFIP2,LMOD1,TMOD2,EEF2K,F11R,RHOF,BAIAP2L1,RHOJ,SHROOM4,PREX1,MICALL2,ARAP1	33/597
2_Member	GO Biological Processes	GO:0030036	actin cytoskeleton organization	-6.15997	-3.74591	58,301,408,800,1525,3688,4542,5156,6525,7018,7168,7169,10398,10458,10580,22902,23370,23384,23647,25802,29767,29904,50848,54509,55971,57381,57477,57580,79778,116985	ACTA1,ANXA1,ARRB1,CALD1,CXADR,ITGB1,MYO1F,PDGFRA,SMTN,TF,TPM1,TPM2,MYL9,BAIAP2,SORBS1,RUFY3,ARHGEF18,SPECC1L,ARFIP2,LMOD1,TMOD2,EEF2K,F11R,RHOF,BAIAP2L1,RHOJ,SHROOM4,PREX1,MICALL2,ARAP1	30/536
2_Member	GO Biological Processes	GO:0007015	actin filament organization	-4.56133	-2.51597	58,408,800,4542,7018,7168,7169,10458,10580,22902,25802,54509,55971,57477,57580,79778,116985	ACTA1,ARRB1,CALD1,MYO1F,TF,TPM1,TPM2,BAIAP2,SORBS1,RUFY3,LMOD1,RHOF,BAIAP2L1,SHROOM4,PREX1,MICALL2,ARAP1	17/261
3_Summary	GO Biological Processes	GO:0010942	positive regulation of cell death	-11.1638	-7.41733	301,409,467,580,958,997,1490,1512,1612,1676,1788,1948,3491,3688,3725,3965,4609,5481,5519,5599,5625,5743,6347,6789,6850,7052,7057,8644,8682,8717,8915,9833,10533,10616,11200,27250,54507,55164,56616,57118,84524,641700	ANXA1,ARRB2,ATF3,BARD1,CD40,CDC34,CCN2,CTSH,DAPK1,DFFA,DNMT3A,EFNB2,CCN1,ITGB1,JUN,LGALS9,MYC,PPID,PPP2R1B,MAPK8,PRODH,PTGS2,CCL2,STK4,SYK,TGM2,THBS1,AKR1C3,PEA15,TRADD,BCL10,MELK,ATG7,RBCK1,CHEK2,PDCD4,ADAMTSL4,SHQ1,DIABLO,CAMK1D,ZC3H8,ECSCR	42/-
3_Member	GO Biological Processes	GO:0010942	positive regulation of cell death	-11.1638	-7.41733	301,409,467,580,958,997,1490,1512,1612,1676,1788,1948,3491,3688,3725,3965,4609,5481,5519,5599,5625,5743,6347,6789,6850,7052,7057,8644,8682,8717,8915,9833,10533,10616,11200,27250,54507,55164,56616,57118,84524,641700	ANXA1,ARRB2,ATF3,BARD1,CD40,CDC34,CCN2,CTSH,DAPK1,DFFA,DNMT3A,EFNB2,CCN1,ITGB1,JUN,LGALS9,MYC,PPID,PPP2R1B,MAPK8,PRODH,PTGS2,CCL2,STK4,SYK,TGM2,THBS1,AKR1C3,PEA15,TRADD,BCL10,MELK,ATG7,RBCK1,CHEK2,PDCD4,ADAMTSL4,SHQ1,DIABLO,CAMK1D,ZC3H8,ECSCR	42/609
3_Member	GO Biological Processes	GO:0043068	positive regulation of programmed cell death	-9.92579	-6.42296	301,409,467,580,958,997,1512,1612,1676,3491,3688,3725,3965,4609,5481,5519,5599,5743,6347,6789,6850,7052,7057,8644,8682,8717,8915,9833,10533,10616,11200,27250,54507,55164,56616,57118,84524,641700	ANXA1,ARRB2,ATF3,BARD1,CD40,CDC34,CTSH,DAPK1,DFFA,CCN1,ITGB1,JUN,LGALS9,MYC,PPID,PPP2R1B,MAPK8,PTGS2,CCL2,STK4,SYK,TGM2,THBS1,AKR1C3,PEA15,TRADD,BCL10,MELK,ATG7,RBCK1,CHEK2,PDCD4,ADAMTSL4,SHQ1,DIABLO,CAMK1D,ZC3H8,ECSCR	38/561
3_Member	GO Biological Processes	GO:0043065	positive regulation of apoptotic process	-9.84161	-6.42296	301,409,467,580,958,997,1512,1612,1676,3491,3688,3725,3965,4609,5481,5519,5599,5743,6347,6789,7052,7057,8644,8682,8717,8915,9833,10533,10616,11200,27250,54507,55164,56616,57118,84524,641700	ANXA1,ARRB2,ATF3,BARD1,CD40,CDC34,CTSH,DAPK1,DFFA,CCN1,ITGB1,JUN,LGALS9,MYC,PPID,PPP2R1B,MAPK8,PTGS2,CCL2,STK4,TGM2,THBS1,AKR1C3,PEA15,TRADD,BCL10,MELK,ATG7,RBCK1,CHEK2,PDCD4,ADAMTSL4,SHQ1,DIABLO,CAMK1D,ZC3H8,ECSCR	37/539
4_Summary	WikiPathways	WP5322	CKAP4 signaling pathway map	-10.6348	-6.98523	999,1490,1832,3688,3691,3725,3791,4282,4609,5054,5328,5460,6657,6935,7431,7867,11200,56241	CDH1,CCN2,DSP,ITGB1,ITGB4,JUN,KDR,MIF,MYC,SERPINE1,PLAU,POU5F1,SOX2,ZEB1,VIM,MAPKAPK3,CHEK2,SUSD2	18/-
4_Member	WikiPathways	WP5322	CKAP4 signaling pathway map	-10.6348	-6.98523	999,1490,1832,3688,3691,3725,3791,4282,4609,5054,5328,5460,6657,6935,7431,7867,11200,56241	CDH1,CCN2,DSP,ITGB1,ITGB4,JUN,KDR,MIF,MYC,SERPINE1,PLAU,POU5F1,SOX2,ZEB1,VIM,MAPKAPK3,CHEK2,SUSD2	18/116
5_Summary	KEGG Pathway	hsa01240	Biosynthesis of cofactors	-10.3414	-6.77103	205,249,586,790,1723,2356,2643,4144,5372,6470,7372,8836,10201,26289,27430,29968,55163,55312,79717,349565,4023,4548,4552,5743,8644,23590,55937,57017,83666,231,6121,6120,23171,25796	AK4,ALPL,BCAT1,CAD,DHODH,FPGS,GCH1,MAT2A,PMM1,SHMT1,UMPS,GGH,NME6,AK5,MAT2B,PSAT1,PNPO,RFK,PPCS,NMNAT3,LPL,MTR,MTRR,PTGS2,AKR1C3,PDSS1,APOM,COQ9,PARP9,AKR1B1,RPE65,RPE,GPD1L,PGLS	34/-
5_Member	KEGG Pathway	hsa01240	Biosynthesis of cofactors	-10.3414	-6.77103	205,249,586,790,1723,2356,2643,4144,5372,6470,7372,8836,10201,26289,27430,29968,55163,55312,79717,349565	AK4,ALPL,BCAT1,CAD,DHODH,FPGS,GCH1,MAT2A,PMM1,SHMT1,UMPS,GGH,NME6,AK5,MAT2B,PSAT1,PNPO,RFK,PPCS,NMNAT3	20/153
5_Member	Reactome Gene Sets	R-HSA-196854	Metabolism of vitamins and cofactors	-5.70013	-3.37688	2356,2643,4023,4548,4552,5743,6470,8644,23590,55163,55312,55937,57017,79717,83666,349565	FPGS,GCH1,LPL,MTR,MTRR,PTGS2,SHMT1,AKR1C3,PDSS1,PNPO,RFK,APOM,COQ9,PPCS,PARP9,NMNAT3	16/191
5_Member	GO Biological Processes	GO:0006767	water-soluble vitamin metabolic process	-5.62097	-3.33494	231,249,2356,4548,4552,6470,29968,55163,55312	AKR1B1,ALPL,FPGS,MTR,MTRR,SHMT1,PSAT1,PNPO,RFK	9/58
5_Member	GO Biological Processes	GO:0042364	water-soluble vitamin biosynthetic process	-4.95998	-2.83436	231,29968,55163,55312	AKR1B1,PSAT1,PNPO,RFK	4/8
5_Member	GO Biological Processes	GO:0006766	vitamin metabolic process	-4.512	-2.47519	231,249,2356,4548,4552,6121,6470,29968,55163,55312	AKR1B1,ALPL,FPGS,MTR,MTRR,RPE65,SHMT1,PSAT1,PNPO,RFK	10/98
5_Member	GO Biological Processes	GO:0042816	vitamin B6 metabolic process	-4.09486	-2.18563	249,29968,55163	ALPL,PSAT1,PNPO	3/5
5_Member	GO Biological Processes	GO:0072524	pyridine-containing compound metabolic process	-3.73639	-1.94368	249,6120,23171,25796,29968,55163,83666,349565	ALPL,RPE,GPD1L,PGLS,PSAT1,PNPO,PARP9,NMNAT3	8/78
5_Member	GO Biological Processes	GO:0009110	vitamin biosynthetic process	-3.71909	-1.94107	231,29968,55163,55312	AKR1B1,PSAT1,PNPO,RFK	4/15
5_Member	Reactome Gene Sets	R-HSA-196849	Metabolism of water-soluble vitamins and cofactors	-3.64917	-1.88293	2356,4548,4552,5743,6470,55163,55312,79717,83666,349565	FPGS,MTR,MTRR,PTGS2,SHMT1,PNPO,RFK,PPCS,PARP9,NMNAT3	10/124
5_Member	GO Biological Processes	GO:0072525	pyridine-containing compound biosynthetic process	-2.46783	-1.06425	29968,55163,83666,349565	PSAT1,PNPO,PARP9,NMNAT3	4/31
6_Summary	GO Biological Processes	GO:2000147	positive regulation of cell motility	-9.79729	-6.42296	14,90,301,958,1240,1435,1512,1601,2149,2152,2324,3491,3688,3725,3791,3965,4192,5054,5156,5328,5336,5420,5606,5743,6776,6789,7018,7057,8717,8840,10253,10509,10630,22902,27347,55140,57118,57381,286077,302,634,800,1464,1490,1605,1948,2049,4015,6347,6444,6654,6850,7410,7453,9289,219699,284217,641700,4609,5087,6935,7052,8915,1289,6443	AAMP,ACVR1,ANXA1,CD40,CMKLR1,CSF1,CTSH,DAB2,F2R,F3,FLT4,CCN1,ITGB1,JUN,KDR,LGALS9,MDK,SERPINE1,PDGFRA,PLAU,PLCG2,PODXL,MAP2K3,PTGS2,STAT5A,STK4,TF,THBS1,TRADD,CCN4,SPRY2,SEMA4B,PDPN,RUFY3,STK39,ELP3,CAMK1D,RHOJ,FAM83H,ANXA2,CEACAM1,CALD1,CSPG4,CCN2,DAG1,EFNB2,EPHB3,LOX,CCL2,SGCD,SOS1,SYK,VAV2,WARS1,ADGRG1,UNC5B,LAMA1,ECSCR,MYC,PBX1,ZEB1,TGM2,BCL10,COL5A1,SGCB	65/-
6_Member	GO Biological Processes	GO:2000147	positive regulation of cell motility	-9.79729	-6.42296	14,90,301,958,1240,1435,1512,1601,2149,2152,2324,3491,3688,3725,3791,3965,4192,5054,5156,5328,5336,5420,5606,5743,6776,6789,7018,7057,8717,8840,10253,10509,10630,22902,27347,55140,57118,57381,286077	AAMP,ACVR1,ANXA1,CD40,CMKLR1,CSF1,CTSH,DAB2,F2R,F3,FLT4,CCN1,ITGB1,JUN,KDR,LGALS9,MDK,SERPINE1,PDGFRA,PLAU,PLCG2,PODXL,MAP2K3,PTGS2,STAT5A,STK4,TF,THBS1,TRADD,CCN4,SPRY2,SEMA4B,PDPN,RUFY3,STK39,ELP3,CAMK1D,RHOJ,FAM83H	39/593
6_Member	GO Biological Processes	GO:0030335	positive regulation of cell migration	-9.77151	-6.42296	14,90,301,958,1240,1435,1512,1601,2149,2152,2324,3491,3688,3725,3791,3965,4192,5054,5156,5328,5336,5420,5606,5743,6776,6789,7057,8717,8840,10253,10509,10630,22902,27347,55140,57118,57381,286077	AAMP,ACVR1,ANXA1,CD40,CMKLR1,CSF1,CTSH,DAB2,F2R,F3,FLT4,CCN1,ITGB1,JUN,KDR,LGALS9,MDK,SERPINE1,PDGFRA,PLAU,PLCG2,PODXL,MAP2K3,PTGS2,STAT5A,STK4,THBS1,TRADD,CCN4,SPRY2,SEMA4B,PDPN,RUFY3,STK39,ELP3,CAMK1D,RHOJ,FAM83H	38/568
6_Member	GO Biological Processes	GO:0040017	positive regulation of locomotion	-9.48316	-6.27851	14,90,301,958,1240,1435,1512,1601,2149,2152,2324,3491,3688,3725,3791,3965,4192,5054,5156,5328,5336,5420,5606,5743,6776,6789,7018,7057,8717,8840,10253,10509,10630,22902,27347,55140,57118,57381,286077	AAMP,ACVR1,ANXA1,CD40,CMKLR1,CSF1,CTSH,DAB2,F2R,F3,FLT4,CCN1,ITGB1,JUN,KDR,LGALS9,MDK,SERPINE1,PDGFRA,PLAU,PLCG2,PODXL,MAP2K3,PTGS2,STAT5A,STK4,TF,THBS1,TRADD,CCN4,SPRY2,SEMA4B,PDPN,RUFY3,STK39,ELP3,CAMK1D,RHOJ,FAM83H	39/608
6_Member	GO Biological Processes	GO:0048514	blood vessel morphogenesis	-9.45625	-6.27851	14,90,302,634,800,1464,1490,1605,1948,2049,2324,3491,3688,3725,3791,4015,5054,5156,5743,6347,6444,6654,6789,6850,7057,7410,7453,9289,57381,219699,284217,641700	AAMP,ACVR1,ANXA2,CEACAM1,CALD1,CSPG4,CCN2,DAG1,EFNB2,EPHB3,FLT4,CCN1,ITGB1,JUN,KDR,LOX,SERPINE1,PDGFRA,PTGS2,CCL2,SGCD,SOS1,STK4,SYK,THBS1,VAV2,WARS1,ADGRG1,RHOJ,UNC5B,LAMA1,ECSCR	32/430
6_Member	GO Biological Processes	GO:0001525	angiogenesis	-9.45098	-6.27851	14,90,302,634,800,1464,1490,1605,1948,2049,2324,3491,3688,3725,3791,5054,5156,5743,6347,6789,6850,7057,7410,7453,9289,57381,219699,641700	AAMP,ACVR1,ANXA2,CEACAM1,CALD1,CSPG4,CCN2,DAG1,EFNB2,EPHB3,FLT4,CCN1,ITGB1,JUN,KDR,SERPINE1,PDGFRA,PTGS2,CCL2,STK4,SYK,THBS1,VAV2,WARS1,ADGRG1,RHOJ,UNC5B,ECSCR	28/336
6_Member	GO Biological Processes	GO:0035239	tube morphogenesis	-9.15806	-6.01362	14,90,302,634,800,1435,1464,1490,1512,1605,1948,2049,2324,3491,3688,3725,3791,4015,4609,5054,5087,5156,5420,5743,6347,6444,6654,6789,6850,6935,7052,7057,7410,7453,8915,9289,10253,57381,219699,284217,641700	AAMP,ACVR1,ANXA2,CEACAM1,CALD1,CSF1,CSPG4,CCN2,CTSH,DAG1,EFNB2,EPHB3,FLT4,CCN1,ITGB1,JUN,KDR,LOX,MYC,SERPINE1,PBX1,PDGFRA,PODXL,PTGS2,CCL2,SGCD,SOS1,STK4,SYK,ZEB1,TGM2,THBS1,VAV2,WARS1,BCL10,ADGRG1,SPRY2,RHOJ,UNC5B,LAMA1,ECSCR	41/679
6_Member	GO Biological Processes	GO:0001944	vasculature development	-8.76908	-5.6758	14,90,302,634,800,1289,1464,1490,1605,1948,2049,2324,3491,3688,3725,3791,4015,5054,5156,5743,6347,6443,6444,6654,6789,6850,7057,7410,7453,9289,10630,57381,219699,284217,641700	AAMP,ACVR1,ANXA2,CEACAM1,CALD1,COL5A1,CSPG4,CCN2,DAG1,EFNB2,EPHB3,FLT4,CCN1,ITGB1,JUN,KDR,LOX,SERPINE1,PDGFRA,PTGS2,CCL2,SGCB,SGCD,SOS1,STK4,SYK,THBS1,VAV2,WARS1,ADGRG1,PDPN,RHOJ,UNC5B,LAMA1,ECSCR	35/536
6_Member	GO Biological Processes	GO:0001568	blood vessel development	-8.06019	-5.21918	14,90,302,634,800,1289,1464,1490,1605,1948,2049,2324,3491,3688,3725,3791,4015,5054,5156,5743,6347,6444,6654,6789,6850,7057,7410,7453,9289,57381,219699,284217,641700	AAMP,ACVR1,ANXA2,CEACAM1,CALD1,COL5A1,CSPG4,CCN2,DAG1,EFNB2,EPHB3,FLT4,CCN1,ITGB1,JUN,KDR,LOX,SERPINE1,PDGFRA,PTGS2,CCL2,SGCD,SOS1,STK4,SYK,THBS1,VAV2,WARS1,ADGRG1,RHOJ,UNC5B,LAMA1,ECSCR	33/517
7_Summary	GO Biological Processes	GO:0070848	response to growth factor	-9.66896	-6.36179	90,301,409,997,1280,1478,1490,1601,1845,2324,2615,3036,3725,3791,4609,5045,5151,5156,5606,6347,6654,6657,6935,7057,7412,9314,10253,10458,11075,23768,27250,29904,30844,57045,79801,91612,558,1287,1435,1464,1948,2049,2202,3055,4015,5795,6121,6776,6850,7018,7410,7431,7867,8717,10580,25791,59338	ACVR1,ANXA1,ARRB2,CDC34,COL2A1,CSTF2,CCN2,DAB2,DUSP3,FLT4,LRRC32,HAS1,JUN,KDR,MYC,FURIN,PDE8A,PDGFRA,MAP2K3,CCL2,SOS1,SOX2,ZEB1,THBS1,VCAM1,KLF4,SPRY2,BAIAP2,STMN2,FLRT2,PDCD4,EEF2K,EHD4,TWSG1,SHCBP1,CHURC1,AXL,COL4A5,CSF1,CSPG4,EFNB2,EPHB3,EFEMP1,HCK,LOX,PTPRJ,RPE65,STAT5A,SYK,TF,VAV2,VIM,MAPKAPK3,TRADD,SORBS1,NGEF,PLEKHA1	57/-
7_Member	GO Biological Processes	GO:0070848	response to growth factor	-9.66896	-6.36179	90,301,409,997,1280,1478,1490,1601,1845,2324,2615,3036,3725,3791,4609,5045,5151,5156,5606,6347,6654,6657,6935,7057,7412,9314,10253,10458,11075,23768,27250,29904,30844,57045,79801,91612	ACVR1,ANXA1,ARRB2,CDC34,COL2A1,CSTF2,CCN2,DAB2,DUSP3,FLT4,LRRC32,HAS1,JUN,KDR,MYC,FURIN,PDE8A,PDGFRA,MAP2K3,CCL2,SOS1,SOX2,ZEB1,THBS1,VCAM1,KLF4,SPRY2,BAIAP2,STMN2,FLRT2,PDCD4,EEF2K,EHD4,TWSG1,SHCBP1,CHURC1	36/521
7_Member	GO Biological Processes	GO:0071363	cellular response to growth factor stimulus	-8.65491	-5.60738	90,301,409,1280,1478,1490,1601,1845,2324,2615,3036,3725,3791,5045,5151,5156,5606,6347,6654,6935,7057,7412,9314,10253,10458,11075,23768,27250,29904,30844,57045,79801,91612	ACVR1,ANXA1,ARRB2,COL2A1,CSTF2,CCN2,DAB2,DUSP3,FLT4,LRRC32,HAS1,JUN,KDR,FURIN,PDE8A,PDGFRA,MAP2K3,CCL2,SOS1,ZEB1,THBS1,VCAM1,KLF4,SPRY2,BAIAP2,STMN2,FLRT2,PDCD4,EEF2K,EHD4,TWSG1,SHCBP1,CHURC1	33/489
7_Member	GO Biological Processes	GO:0007167	enzyme-linked receptor protein signaling pathway	-8.55275	-5.56592	90,409,558,1287,1435,1464,1490,1948,2049,2202,2324,2615,3055,3725,3791,4015,5045,5156,5795,6121,6654,6776,6850,7018,7410,7431,7867,8717,10253,10458,10580,23768,25791,27250,57045,59338,79801,91612	ACVR1,ARRB2,AXL,COL4A5,CSF1,CSPG4,CCN2,EFNB2,EPHB3,EFEMP1,FLT4,LRRC32,HCK,JUN,KDR,LOX,FURIN,PDGFRA,PTPRJ,RPE65,SOS1,STAT5A,SYK,TF,VAV2,VIM,MAPKAPK3,TRADD,SPRY2,BAIAP2,SORBS1,FLRT2,NGEF,PDCD4,TWSG1,PLEKHA1,SHCBP1,CHURC1	38/628
7_Member	GO Biological Processes	GO:0007169	transmembrane receptor protein tyrosine kinase signaling pathway	-7.94326	-5.1629	558,1287,1435,1464,1490,1948,2049,2202,2324,3055,3791,4015,5156,5795,6121,6654,6776,6850,7410,7867,8717,10253,10458,10580,23768,25791,59338,79801,91612	AXL,COL4A5,CSF1,CSPG4,CCN2,EFNB2,EPHB3,EFEMP1,FLT4,HCK,KDR,LOX,PDGFRA,PTPRJ,RPE65,SOS1,STAT5A,SYK,VAV2,MAPKAPK3,TRADD,SPRY2,BAIAP2,SORBS1,FLRT2,NGEF,PLEKHA1,SHCBP1,CHURC1	29/418
8_Summary	GO Biological Processes	GO:0009611	response to wounding	-9.51913	-6.27851	558,634,958,1001,1289,1490,1605,1832,2149,2152,2670,3491,3688,3691,3705,3725,3791,4015,4192,4548,5156,5328,5336,5340,5460,6657,6850,7168,7410,10398,10630,57132,653145,231,302,362,5054,5066,6776,7057,7372,27347,114897,14,197,408,409,481,1445,1525,4282,5099,5519,6566,6654,7018,10381,10383,29789,50848,55605,140885	AXL,CEACAM1,CD40,CDH3,COL5A1,CCN2,DAG1,DSP,F2R,F3,GFAP,CCN1,ITGB1,ITGB4,ITPK1,JUN,KDR,LOX,MDK,MTR,PDGFRA,PLAU,PLCG2,PLG,POU5F1,SOX2,SYK,TPM1,VAV2,MYL9,PDPN,CHMP1B,ANXA8,AKR1B1,ANXA2,AQP5,SERPINE1,PAM,STAT5A,THBS1,UMPS,STK39,C1QTNF1,AAMP,AHSG,ARRB1,ARRB2,ATP1B1,CSK,CXADR,MIF,PCDH7,PPP2R1B,SLC16A1,SOS1,TF,TUBB3,TUBB4B,OLA1,F11R,KIF21A,SIRPA	62/-
8_Member	GO Biological Processes	GO:0009611	response to wounding	-9.51913	-6.27851	558,634,958,1001,1289,1490,1605,1832,2149,2152,2670,3491,3688,3691,3705,3725,3791,4015,4192,4548,5156,5328,5336,5340,5460,6657,6850,7168,7410,10398,10630,57132,653145	AXL,CEACAM1,CD40,CDH3,COL5A1,CCN2,DAG1,DSP,F2R,F3,GFAP,CCN1,ITGB1,ITGB4,ITPK1,JUN,KDR,LOX,MDK,MTR,PDGFRA,PLAU,PLCG2,PLG,POU5F1,SOX2,SYK,TPM1,VAV2,MYL9,PDPN,CHMP1B,ANXA8	33/452
8_Member	GO Biological Processes	GO:0042060	wound healing	-7.57163	-4.83585	558,634,958,1001,1289,1605,1832,2149,2152,3491,3688,3705,3791,4015,5156,5328,5336,5340,6850,7168,7410,10398,10630,57132,653145	AXL,CEACAM1,CD40,CDH3,COL5A1,DAG1,DSP,F2R,F3,CCN1,ITGB1,ITPK1,KDR,LOX,PDGFRA,PLAU,PLCG2,PLG,SYK,TPM1,VAV2,MYL9,PDPN,CHMP1B,ANXA8	25/334
8_Member	GO Biological Processes	GO:0050878	regulation of body fluid levels	-7.1999	-4.5141	231,302,362,558,634,958,2149,2152,3705,5054,5066,5156,5328,5336,5340,6776,6850,7057,7372,7410,10398,10630,27347,114897,653145	AKR1B1,ANXA2,AQP5,AXL,CEACAM1,CD40,F2R,F3,ITPK1,SERPINE1,PAM,PDGFRA,PLAU,PLCG2,PLG,STAT5A,SYK,THBS1,UMPS,VAV2,MYL9,PDPN,STK39,C1QTNF1,ANXA8	25/349
8_Member	Reactome Gene Sets	R-HSA-109582	Hemostasis	-6.20975	-3.78027	14,197,302,408,409,481,634,1445,1525,2149,2152,3688,3705,4282,5054,5099,5328,5336,5340,5519,6566,6654,6850,7018,7057,7410,10381,10383,10630,29789,50848,55605,140885	AAMP,AHSG,ANXA2,ARRB1,ARRB2,ATP1B1,CEACAM1,CSK,CXADR,F2R,F3,ITGB1,ITPK1,MIF,SERPINE1,PCDH7,PLAU,PLCG2,PLG,PPP2R1B,SLC16A1,SOS1,SYK,TF,THBS1,VAV2,TUBB3,TUBB4B,PDPN,OLA1,F11R,KIF21A,SIRPA	33/621
8_Member	GO Biological Processes	GO:0007596	blood coagulation	-4.86455	-2.75903	558,958,2149,2152,3705,5156,5328,5336,5340,6850,7410,10398,10630,653145	AXL,CD40,F2R,F3,ITPK1,PDGFRA,PLAU,PLCG2,PLG,SYK,VAV2,MYL9,PDPN,ANXA8	14/174
8_Member	GO Biological Processes	GO:0050817	coagulation	-4.80836	-2.71266	558,958,2149,2152,3705,5156,5328,5336,5340,6850,7410,10398,10630,653145	AXL,CD40,F2R,F3,ITPK1,PDGFRA,PLAU,PLCG2,PLG,SYK,VAV2,MYL9,PDPN,ANXA8	14/176
8_Member	GO Biological Processes	GO:0007599	hemostasis	-4.69852	-2.61947	558,958,2149,2152,3705,5156,5328,5336,5340,6850,7410,10398,10630,653145	AXL,CD40,F2R,F3,ITPK1,PDGFRA,PLAU,PLCG2,PLG,SYK,VAV2,MYL9,PDPN,ANXA8	14/180
8_Member	Reactome Gene Sets	R-HSA-76002	Platelet activation, signaling and aggregation	-4.51932	-2.47826	14,197,408,409,1445,2149,5054,5099,5336,5340,6654,6850,7018,7057,7410,10630,29789	AAMP,AHSG,ARRB1,ARRB2,CSK,F2R,SERPINE1,PCDH7,PLCG2,PLG,SOS1,SYK,TF,THBS1,VAV2,PDPN,OLA1	17/263
8_Member	GO Biological Processes	GO:0030168	platelet activation	-3.72908	-1.9413	558,958,2149,5156,5336,6850,7410,10398,10630	AXL,CD40,F2R,PDGFRA,PLCG2,SYK,VAV2,MYL9,PDPN	9/99
9_Summary	GO Biological Processes	GO:0062197	cellular response to chemical stress	-9.12335	-6.00524	231,301,318,362,558,1612,3297,3725,5156,5599,5603,5625,5743,6326,7168,9817,9833,10533,27347,51389,56616,59338,83959,116988,140885,8815,54974	AKR1B1,ANXA1,NUDT2,AQP5,AXL,DAPK1,HSF1,JUN,PDGFRA,MAPK8,MAPK13,PRODH,PTGS2,SCN2A,TPM1,KEAP1,MELK,ATG7,STK39,RWDD1,DIABLO,PLEKHA1,SLC4A11,AGAP3,SIRPA,BANF1,THG1L	27/-
9_Member	GO Biological Processes	GO:0062197	cellular response to chemical stress	-9.12335	-6.00524	231,301,318,362,558,1612,3297,3725,5156,5599,5603,5625,5743,6326,7168,9817,9833,10533,27347,51389,56616,59338,83959,116988,140885	AKR1B1,ANXA1,NUDT2,AQP5,AXL,DAPK1,HSF1,JUN,PDGFRA,MAPK8,MAPK13,PRODH,PTGS2,SCN2A,TPM1,KEAP1,MELK,ATG7,STK39,RWDD1,DIABLO,PLEKHA1,SLC4A11,AGAP3,SIRPA	25/280
9_Member	GO Biological Processes	GO:0034599	cellular response to oxidative stress	-6.55732	-4.06753	301,318,558,1612,3297,3725,5156,5599,5603,5625,7168,9817,9833,51389,56616,59338,83959,116988,140885	ANXA1,NUDT2,AXL,DAPK1,HSF1,JUN,PDGFRA,MAPK8,MAPK13,PRODH,TPM1,KEAP1,MELK,RWDD1,DIABLO,PLEKHA1,SLC4A11,AGAP3,SIRPA	19/230
9_Member	GO Biological Processes	GO:0006979	response to oxidative stress	-4.99534	-2.8563	301,318,558,1612,3297,3725,5156,5599,5603,5625,5743,7168,8815,9817,9833,51389,54974,56616,59338,83959,116988,140885	ANXA1,NUDT2,AXL,DAPK1,HSF1,JUN,PDGFRA,MAPK8,MAPK13,PRODH,PTGS2,TPM1,BANF1,KEAP1,MELK,RWDD1,THG1L,DIABLO,PLEKHA1,SLC4A11,AGAP3,SIRPA	22/375
9_Member	GO Biological Processes	GO:0034614	cellular response to reactive oxygen species	-4.26955	-2.31369	301,558,3297,3725,5156,5599,5603,7168,59338,116988,140885	ANXA1,AXL,HSF1,JUN,PDGFRA,MAPK8,MAPK13,TPM1,PLEKHA1,AGAP3,SIRPA	11/126
9_Member	GO Biological Processes	GO:0000302	response to reactive oxygen species	-2.96938	-1.41181	301,558,3297,3725,5156,5599,5603,7168,59338,116988,140885	ANXA1,AXL,HSF1,JUN,PDGFRA,MAPK8,MAPK13,TPM1,PLEKHA1,AGAP3,SIRPA	11/178
9_Member	GO Biological Processes	GO:0070301	cellular response to hydrogen peroxide	-2.65855	-1.20376	301,558,3297,5603,59338,140885	ANXA1,AXL,HSF1,MAPK13,PLEKHA1,SIRPA	6/66
10_Summary	GO Biological Processes	GO:0008033	tRNA processing	-8.68303	-5.61322	8518,10557,11102,27037,51637,54888,54974,55140,55226,55250,63892,64172,79691,80324,81890,112970,134637,7453,92675,123283,104,27079,51106,55783,83640,9326,54853,57510,79863,84524,1478	ELP1,RPP38,RPP14,TRMT2A,RTRAF,NSUN2,THG1L,ELP3,NAT10,ELP2,THADA,OSGEPL1,QTRT2,PUS1,QTRT1,KTI12,ADAT2,WARS1,DTD1,TARS3,ADARB1,RPUSD2,TFB1M,CMTR2,RAMAC,ZNHIT3,WDR55,XPO5,RBFA,ZC3H8,CSTF2	31/-
10_Member	GO Biological Processes	GO:0008033	tRNA processing	-8.68303	-5.61322	8518,10557,11102,27037,51637,54888,54974,55140,55226,55250,63892,64172,79691,80324,81890,112970,134637	ELP1,RPP38,RPP14,TRMT2A,RTRAF,NSUN2,THG1L,ELP3,NAT10,ELP2,THADA,OSGEPL1,QTRT2,PUS1,QTRT1,KTI12,ADAT2	17/134
10_Member	GO Biological Processes	GO:0006399	tRNA metabolic process	-8.49071	-5.52236	7453,8518,10557,11102,27037,51637,54888,54974,55140,55226,55250,63892,64172,79691,80324,81890,92675,112970,123283,134637	WARS1,ELP1,RPP38,RPP14,TRMT2A,RTRAF,NSUN2,THG1L,ELP3,NAT10,ELP2,THADA,OSGEPL1,QTRT2,PUS1,QTRT1,DTD1,KTI12,TARS3,ADAT2	20/194
10_Member	GO Biological Processes	GO:0009451	RNA modification	-8.30855	-5.43711	104,8518,27037,27079,51106,54888,54974,55140,55226,55250,55783,63892,64172,79691,80324,81890,83640,112970,134637	ADARB1,ELP1,TRMT2A,RPUSD2,TFB1M,NSUN2,THG1L,ELP3,NAT10,ELP2,CMTR2,THADA,OSGEPL1,QTRT2,PUS1,QTRT1,RAMAC,KTI12,ADAT2	19/179
10_Member	GO Biological Processes	GO:0006400	tRNA modification	-8.17395	-5.31676	8518,27037,54888,54974,55140,55226,55250,63892,64172,79691,80324,81890,112970,134637	ELP1,TRMT2A,NSUN2,THG1L,ELP3,NAT10,ELP2,THADA,OSGEPL1,QTRT2,PUS1,QTRT1,KTI12,ADAT2	14/94
10_Member	GO Biological Processes	GO:0034660	ncRNA metabolic process	-5.00881	-2.86708	7453,8518,9326,10557,11102,27037,27079,51106,51637,54853,54888,54974,55140,55226,55250,57510,63892,64172,79691,79863,80324,81890,84524,92675,112970,123283,134637	WARS1,ELP1,ZNHIT3,RPP38,RPP14,TRMT2A,RPUSD2,TFB1M,RTRAF,WDR55,NSUN2,THG1L,ELP3,NAT10,ELP2,XPO5,THADA,OSGEPL1,QTRT2,RBFA,PUS1,QTRT1,ZC3H8,DTD1,KTI12,TARS3,ADAT2	27/520
10_Member	Reactome Gene Sets	R-HSA-72306	tRNA processing	-4.93617	-2.81806	1478,10557,11102,51637,54888,54974,63892,79691,80324,81890,134637	CSTF2,RPP38,RPP14,RTRAF,NSUN2,THG1L,THADA,QTRT2,PUS1,QTRT1,ADAT2	11/107
10_Member	Reactome Gene Sets	R-HSA-6782315	tRNA modification in the nucleus and cytosol	-4.63402	-2.56649	54888,54974,63892,79691,80324,81890,134637	NSUN2,THG1L,THADA,QTRT2,PUS1,QTRT1,ADAT2	7/43
10_Member	GO Biological Processes	GO:0034470	ncRNA processing	-4.29505	-2.33566	8518,9326,10557,11102,27037,27079,51106,51637,54853,54888,54974,55140,55226,55250,63892,64172,79691,79863,80324,81890,112970,134637	ELP1,ZNHIT3,RPP38,RPP14,TRMT2A,RPUSD2,TFB1M,RTRAF,WDR55,NSUN2,THG1L,ELP3,NAT10,ELP2,THADA,OSGEPL1,QTRT2,RBFA,PUS1,QTRT1,KTI12,ADAT2	22/417
11_Summary	GO Biological Processes	GO:0045229	external encapsulating structure organization	-8.58614	-5.56592	302,1280,1287,1289,1301,1302,1303,1490,1605,2670,3036,3491,3688,4015,5045,5156,5340,7051,10516,23768,54507,64856,83716,84695,3691,7057,284217,1435,3791,6696,50848,26577,999,1634,5795,6654,197,249,1009,5743,6657,7286,8840,22801,57045,481,6510,6935,8091	ANXA2,COL2A1,COL4A5,COL5A1,COL11A1,COL11A2,COL12A1,CCN2,DAG1,GFAP,HAS1,CCN1,ITGB1,LOX,FURIN,PDGFRA,PLG,TGM1,FBLN5,FLRT2,ADAMTSL4,VWA1,CRISPLD2,LOXL3,ITGB4,THBS1,LAMA1,CSF1,KDR,SPP1,F11R,PCOLCE2,CDH1,DCN,PTPRJ,SOS1,AHSG,ALPL,CDH11,PTGS2,SOX2,TUFT1,CCN4,ITGA11,TWSG1,ATP1B1,SLC1A5,ZEB1,HMGA2	49/-
11_Member	GO Biological Processes	GO:0045229	external encapsulating structure organization	-8.58614	-5.56592	302,1280,1287,1289,1301,1302,1303,1490,1605,2670,3036,3491,3688,4015,5045,5156,5340,7051,10516,23768,54507,64856,83716,84695	ANXA2,COL2A1,COL4A5,COL5A1,COL11A1,COL11A2,COL12A1,CCN2,DAG1,GFAP,HAS1,CCN1,ITGB1,LOX,FURIN,PDGFRA,PLG,TGM1,FBLN5,FLRT2,ADAMTSL4,VWA1,CRISPLD2,LOXL3	24/275
11_Member	GO Biological Processes	GO:0030198	extracellular matrix organization	-7.99475	-5.17767	302,1280,1287,1289,1301,1302,1303,1490,1605,2670,3036,3491,3688,4015,5045,5156,5340,10516,23768,54507,64856,83716,84695	ANXA2,COL2A1,COL4A5,COL5A1,COL11A1,COL11A2,COL12A1,CCN2,DAG1,GFAP,HAS1,CCN1,ITGB1,LOX,FURIN,PDGFRA,PLG,FBLN5,FLRT2,ADAMTSL4,VWA1,CRISPLD2,LOXL3	23/272
11_Member	GO Biological Processes	GO:0043062	extracellular structure organization	-7.96471	-5.16356	302,1280,1287,1289,1301,1302,1303,1490,1605,2670,3036,3491,3688,4015,5045,5156,5340,10516,23768,54507,64856,83716,84695	ANXA2,COL2A1,COL4A5,COL5A1,COL11A1,COL11A2,COL12A1,CCN2,DAG1,GFAP,HAS1,CCN1,ITGB1,LOX,FURIN,PDGFRA,PLG,FBLN5,FLRT2,ADAMTSL4,VWA1,CRISPLD2,LOXL3	23/273
11_Member	Reactome Gene Sets	R-HSA-3000171	Non-integrin membrane-ECM interactions	-6.55319	-4.06753	1280,1287,1289,1301,1302,1605,3688,3691,7057,284217	COL2A1,COL4A5,COL5A1,COL11A1,COL11A2,DAG1,ITGB1,ITGB4,THBS1,LAMA1	10/59
11_Member	Canonical Pathways	M160	PID AVB3 INTEGRIN PATHWAY	-5.61325	-3.33494	1280,1287,1289,1301,1302,1303,1435,3791,6696,50848	COL2A1,COL4A5,COL5A1,COL11A1,COL11A2,COL12A1,CSF1,KDR,SPP1,F11R	10/74
11_Member	Reactome Gene Sets	R-HSA-2022090	Assembly of collagen fibrils and other multimeric structures	-5.43262	-3.198	1280,1287,1289,1301,1302,1303,3691,4015,84695	COL2A1,COL4A5,COL5A1,COL11A1,COL11A2,COL12A1,ITGB4,LOX,LOXL3	9/61
11_Member	Reactome Gene Sets	R-HSA-1474290	Collagen formation	-4.83805	-2.73746	1280,1287,1289,1301,1302,1303,3691,4015,26577,84695	COL2A1,COL4A5,COL5A1,COL11A1,COL11A2,COL12A1,ITGB4,LOX,PCOLCE2,LOXL3	10/90
11_Member	GO Biological Processes	GO:0030199	collagen fibril organization	-4.67006	-2.59566	302,1280,1289,1301,1302,1303,4015,84695	ANXA2,COL2A1,COL5A1,COL11A1,COL11A2,COL12A1,LOX,LOXL3	8/58
11_Member	Reactome Gene Sets	R-HSA-8874081	MET activates PTK2 signaling	-4.57607	-2.52198	1280,1289,1301,1302,3688,284217	COL2A1,COL5A1,COL11A1,COL11A2,ITGB1,LAMA1	6/30
11_Member	Reactome Gene Sets	R-HSA-1474228	Degradation of the extracellular matrix	-3.85652	-2.02362	999,1280,1287,1289,1301,1302,1303,1634,5045,5340,6696	CDH1,COL2A1,COL4A5,COL5A1,COL11A1,COL11A2,COL12A1,DCN,FURIN,PLG,SPP1	11/140
11_Member	Reactome Gene Sets	R-HSA-8875878	MET promotes cell motility	-3.77889	-1.97933	1280,1289,1301,1302,3688,284217	COL2A1,COL5A1,COL11A1,COL11A2,ITGB1,LAMA1	6/41
11_Member	Reactome Gene Sets	R-HSA-6806834	Signaling by MET	-3.69769	-1.92457	1280,1289,1301,1302,3688,5795,6654,284217	COL2A1,COL5A1,COL11A1,COL11A2,ITGB1,PTPRJ,SOS1,LAMA1	8/79
11_Member	GO Biological Processes	GO:0001503	ossification	-3.68558	-1.91451	197,249,1009,1280,1301,1435,1490,3491,4015,5743,6657,6696,7286,8840,22801,57045	AHSG,ALPL,CDH11,COL2A1,COL11A1,CSF1,CCN2,CCN1,LOX,PTGS2,SOX2,SPP1,TUFT1,CCN4,ITGA11,TWSG1	16/279
11_Member	Canonical Pathways	M3005	NABA COLLAGENS	-3.60532	-1.85005	1280,1287,1289,1301,1302,1303	COL2A1,COL4A5,COL5A1,COL11A1,COL11A2,COL12A1	6/44
11_Member	Reactome Gene Sets	R-HSA-8948216	Collagen chain trimerization	-3.60532	-1.85005	1280,1287,1289,1301,1302,1303	COL2A1,COL4A5,COL5A1,COL11A1,COL11A2,COL12A1	6/44
11_Member	Reactome Gene Sets	R-HSA-1442490	Collagen degradation	-3.50824	-1.78603	1280,1287,1289,1301,1302,1303,5045	COL2A1,COL4A5,COL5A1,COL11A1,COL11A2,COL12A1,FURIN	7/64
11_Member	Canonical Pathways	M198	PID SYNDECAN 1 PATHWAY	-3.49734	-1.78124	1280,1287,1289,1301,1302,1303	COL2A1,COL4A5,COL5A1,COL11A1,COL11A2,COL12A1	6/46
11_Member	Reactome Gene Sets	R-HSA-1650814	Collagen biosynthesis and modifying enzymes	-3.38481	-1.70184	1280,1287,1289,1301,1302,1303,26577	COL2A1,COL4A5,COL5A1,COL11A1,COL11A2,COL12A1,PCOLCE2	7/67
11_Member	KEGG Pathway	hsa04974	Protein digestion and absorption	-2.92151	-1.37724	481,1280,1287,1289,1301,1302,1303,6510	ATP1B1,COL2A1,COL4A5,COL5A1,COL11A1,COL11A2,COL12A1,SLC1A5	8/103
11_Member	GO Biological Processes	GO:0061448	connective tissue development	-2.15922	-0.829367	1280,1289,1301,1302,1435,1490,3491,4015,6935,8091,57045	COL2A1,COL5A1,COL11A1,COL11A2,CSF1,CCN2,CCN1,LOX,ZEB1,HMGA2,TWSG1	11/227
11_Member	GO Biological Processes	GO:0001502	cartilage condensation	-2.13634	-0.817979	1280,1301,1490	COL2A1,COL11A1,CCN2	3/20
11_Member	GO Biological Processes	GO:0098743	cell aggregation	-2.01873	-0.735749	1280,1301,1490	COL2A1,COL11A1,CCN2	3/22
12_Summary	GO Biological Processes	GO:1903034	regulation of response to wounding	-8.55644	-5.56592	301,302,634,2149,2152,3688,4192,5054,5156,5328,5340,6696,7057,8840,9314,22876,65078,90102,114897	ANXA1,ANXA2,CEACAM1,F2R,F3,ITGB1,MDK,SERPINE1,PDGFRA,PLAU,PLG,SPP1,THBS1,CCN4,KLF4,INPP5F,RTN4R,PHLDB2,C1QTNF1	19/-
12_Member	GO Biological Processes	GO:1903034	regulation of response to wounding	-8.55644	-5.56592	301,302,634,2149,2152,3688,4192,5054,5156,5328,5340,6696,7057,8840,9314,22876,65078,90102,114897	ANXA1,ANXA2,CEACAM1,F2R,F3,ITGB1,MDK,SERPINE1,PDGFRA,PLAU,PLG,SPP1,THBS1,CCN4,KLF4,INPP5F,RTN4R,PHLDB2,C1QTNF1	19/173
12_Member	GO Biological Processes	GO:1903035	negative regulation of response to wounding	-6.39376	-3.93221	302,634,4192,5054,5156,5328,5340,6696,22876,65078,90102,114897	ANXA2,CEACAM1,MDK,SERPINE1,PDGFRA,PLAU,PLG,SPP1,INPP5F,RTN4R,PHLDB2,C1QTNF1	12/93
12_Member	GO Biological Processes	GO:0061041	regulation of wound healing	-6.12507	-3.72607	301,302,634,2149,2152,3688,5054,5156,5328,5340,7057,8840,90102,114897	ANXA1,ANXA2,CEACAM1,F2R,F3,ITGB1,SERPINE1,PDGFRA,PLAU,PLG,THBS1,CCN4,PHLDB2,C1QTNF1	14/136
12_Member	GO Biological Processes	GO:0030193	regulation of blood coagulation	-5.89871	-3.5518	302,634,2149,2152,5054,5156,5328,5340,7057,114897	ANXA2,CEACAM1,F2R,F3,SERPINE1,PDGFRA,PLAU,PLG,THBS1,C1QTNF1	10/69
12_Member	GO Biological Processes	GO:1900046	regulation of hemostasis	-5.78159	-3.44587	302,634,2149,2152,5054,5156,5328,5340,7057,114897	ANXA2,CEACAM1,F2R,F3,SERPINE1,PDGFRA,PLAU,PLG,THBS1,C1QTNF1	10/71
12_Member	GO Biological Processes	GO:0050818	regulation of coagulation	-5.61325	-3.33494	302,634,2149,2152,5054,5156,5328,5340,7057,114897	ANXA2,CEACAM1,F2R,F3,SERPINE1,PDGFRA,PLAU,PLG,THBS1,C1QTNF1	10/74
12_Member	GO Biological Processes	GO:1903036	positive regulation of response to wounding	-5.50559	-3.24693	301,2149,2152,3688,4192,5054,5328,5340,7057,8840	ANXA1,F2R,F3,ITGB1,MDK,SERPINE1,PLAU,PLG,THBS1,CCN4	10/76
12_Member	GO Biological Processes	GO:0090303	positive regulation of wound healing	-5.37231	-3.1476	301,2149,2152,3688,5054,5328,5340,7057,8840	ANXA1,F2R,F3,ITGB1,SERPINE1,PLAU,PLG,THBS1,CCN4	9/62
12_Member	GO Biological Processes	GO:0030194	positive regulation of blood coagulation	-4.7587	-2.67259	2149,2152,5054,5328,5340,7057	F2R,F3,SERPINE1,PLAU,PLG,THBS1	6/28
12_Member	GO Biological Processes	GO:1900048	positive regulation of hemostasis	-4.7587	-2.67259	2149,2152,5054,5328,5340,7057	F2R,F3,SERPINE1,PLAU,PLG,THBS1	6/28
12_Member	GO Biological Processes	GO:0050820	positive regulation of coagulation	-4.57607	-2.52198	2149,2152,5054,5328,5340,7057	F2R,F3,SERPINE1,PLAU,PLG,THBS1	6/30
12_Member	GO Biological Processes	GO:0030195	negative regulation of blood coagulation	-4.50055	-2.47006	302,634,5054,5156,5328,5340,114897	ANXA2,CEACAM1,SERPINE1,PDGFRA,PLAU,PLG,C1QTNF1	7/45
12_Member	GO Biological Processes	GO:1900047	negative regulation of hemostasis	-4.43646	-2.42704	302,634,5054,5156,5328,5340,114897	ANXA2,CEACAM1,SERPINE1,PDGFRA,PLAU,PLG,C1QTNF1	7/46
12_Member	GO Biological Processes	GO:0050819	negative regulation of coagulation	-4.25382	-2.30546	302,634,5054,5156,5328,5340,114897	ANXA2,CEACAM1,SERPINE1,PDGFRA,PLAU,PLG,C1QTNF1	7/49
12_Member	GO Biological Processes	GO:0051918	negative regulation of fibrinolysis	-3.9859	-2.10716	5054,5328,5340,7057	SERPINE1,PLAU,PLG,THBS1	4/13
12_Member	Reactome Gene Sets	R-HSA-75205	Dissolution of Fibrin Clot	-3.9859	-2.10716	302,5054,5328,5340	ANXA2,SERPINE1,PLAU,PLG	4/13
12_Member	GO Biological Processes	GO:0061045	negative regulation of wound healing	-3.93962	-2.07678	302,634,5054,5156,5328,5340,90102,114897	ANXA2,CEACAM1,SERPINE1,PDGFRA,PLAU,PLG,PHLDB2,C1QTNF1	8/73
12_Member	GO Biological Processes	GO:0010755	regulation of plasminogen activation	-3.38949	-1.70463	302,5054,5328,7057	ANXA2,SERPINE1,PLAU,THBS1	4/18
12_Member	GO Biological Processes	GO:0051917	regulation of fibrinolysis	-3.38949	-1.70463	5054,5328,5340,7057	SERPINE1,PLAU,PLG,THBS1	4/18
12_Member	GO Biological Processes	GO:0010757	negative regulation of plasminogen activation	-3.36647	-1.69114	5054,5328,7057	SERPINE1,PLAU,THBS1	3/8
12_Member	GO Biological Processes	GO:0042730	fibrinolysis	-3.29382	-1.63811	302,5054,5328,5340	ANXA2,SERPINE1,PLAU,PLG	4/19
12_Member	WikiPathways	WP272	Blood clotting cascade	-3.03892	-1.46246	2152,5054,5328,5340	F3,SERPINE1,PLAU,PLG	4/22
12_Member	WikiPathways	WP558	Complement and coagulation cascades	-2.19574	-0.859594	2149,2152,5054,5328,5340	F2R,F3,SERPINE1,PLAU,PLG	5/58
13_Summary	Reactome Gene Sets	R-HSA-449147	Signaling by Interleukins	-8.43682	-5.50324	301,302,1435,1845,3055,3588,3688,3725,3965,4282,4609,4793,5451,5519,5599,5606,5743,5803,6347,6654,6657,6776,6850,6935,7412,7431,7867,9173,23291,27250,59307,552900,90,197,558,958,976,1240,2149,2152,3868,4192,6696,7057,27293,27347,50848,57118,57410,84695,249,1948,2643,3297,3661,5054,5336,8915,140885,342979,1445,5795,7321,999,2289,4023,7018,8398,10458,10616,55971,1605,8031,8644,51389	ANXA1,ANXA2,CSF1,DUSP3,HCK,IL10RB,ITGB1,JUN,LGALS9,MIF,MYC,NFKBIB,POU2F1,PPP2R1B,MAPK8,MAP2K3,PTGS2,PTPRZ1,CCL2,SOS1,SOX2,STAT5A,SYK,ZEB1,VCAM1,VIM,MAPKAPK3,IL1RL1,FBXW11,PDCD4,SIGIRR,BOLA2,ACVR1,AHSG,AXL,CD40,ADGRE5,CMKLR1,F2R,F3,KRT16,MDK,SPP1,THBS1,SMPDL3B,STK39,F11R,CAMK1D,SCYL1,LOXL3,ALPL,EFNB2,GCH1,HSF1,IRF3,SERPINE1,PLCG2,BCL10,SIRPA,PALM3,CSK,PTPRJ,UBE2D1,CDH1,FKBP5,LPL,TF,PLA2G6,BAIAP2,R…	75/-
13_Member	Reactome Gene Sets	R-HSA-449147	Signaling by Interleukins	-8.43682	-5.50324	301,302,1435,1845,3055,3588,3688,3725,3965,4282,4609,4793,5451,5519,5599,5606,5743,5803,6347,6654,6657,6776,6850,6935,7412,7431,7867,9173,23291,27250,59307,552900	ANXA1,ANXA2,CSF1,DUSP3,HCK,IL10RB,ITGB1,JUN,LGALS9,MIF,MYC,NFKBIB,POU2F1,PPP2R1B,MAPK8,MAP2K3,PTGS2,PTPRZ1,CCL2,SOS1,SOX2,STAT5A,SYK,ZEB1,VCAM1,VIM,MAPKAPK3,IL1RL1,FBXW11,PDCD4,SIGIRR,BOLA2	32/473
13_Member	GO Biological Processes	GO:0006954	inflammatory response	-7.74875	-4.98307	90,197,301,558,958,976,1240,1435,2149,2152,3055,3588,3688,3725,3868,3965,4192,4282,4793,5606,5743,6347,6696,6850,7057,7412,9173,27293,27347,50848,57118,57410,59307,84695	ACVR1,AHSG,ANXA1,AXL,CD40,ADGRE5,CMKLR1,CSF1,F2R,F3,HCK,IL10RB,ITGB1,JUN,KRT16,LGALS9,MDK,MIF,NFKBIB,MAP2K3,PTGS2,CCL2,SPP1,SYK,THBS1,VCAM1,IL1RL1,SMPDL3B,STK39,F11R,CAMK1D,SCYL1,SIGIRR,LOXL3	34/560
13_Member	GO Biological Processes	GO:0032496	response to lipopolysaccharide	-6.91395	-4.31358	249,558,1435,1948,2149,2643,3055,3297,3661,3965,4793,5054,5336,5599,5606,5743,6347,7412,7431,7867,8915,27250,140885,342979	ALPL,AXL,CSF1,EFNB2,F2R,GCH1,HCK,HSF1,IRF3,LGALS9,NFKBIB,SERPINE1,PLCG2,MAPK8,MAP2K3,PTGS2,CCL2,VCAM1,VIM,MAPKAPK3,BCL10,PDCD4,SIRPA,PALM3	24/336
13_Member	Reactome Gene Sets	R-HSA-1280215	Cytokine Signaling in Immune system	-6.83547	-4.26719	301,302,958,1435,1445,1845,3055,3588,3661,3688,3725,3965,4282,4609,4793,5336,5451,5519,5599,5606,5743,5795,5803,6347,6654,6657,6776,6850,6935,7321,7412,7431,7867,9173,23291,27250,59307,552900	ANXA1,ANXA2,CD40,CSF1,CSK,DUSP3,HCK,IL10RB,IRF3,ITGB1,JUN,LGALS9,MIF,MYC,NFKBIB,PLCG2,POU2F1,PPP2R1B,MAPK8,MAP2K3,PTGS2,PTPRJ,PTPRZ1,CCL2,SOS1,SOX2,STAT5A,SYK,ZEB1,UBE2D1,VCAM1,VIM,MAPKAPK3,IL1RL1,FBXW11,PDCD4,SIGIRR,BOLA2	38/730
13_Member	GO Biological Processes	GO:0002237	response to molecule of bacterial origin	-6.43189	-3.95256	249,558,1435,1948,2149,2643,3055,3297,3661,3965,4793,5054,5336,5599,5606,5743,6347,7412,7431,7867,8915,27250,140885,342979	ALPL,AXL,CSF1,EFNB2,F2R,GCH1,HCK,HSF1,IRF3,LGALS9,NFKBIB,SERPINE1,PLCG2,MAPK8,MAP2K3,PTGS2,CCL2,VCAM1,VIM,MAPKAPK3,BCL10,PDCD4,SIRPA,PALM3	24/357
13_Member	GO Biological Processes	GO:0009617	response to bacterium	-5.06061	-2.91071	249,558,999,1435,1948,2149,2289,2643,3055,3297,3661,3965,4023,4793,5054,5336,5599,5606,5743,6347,6850,7018,7412,7431,7867,8398,8915,10458,10616,27250,55971,140885,342979	ALPL,AXL,CDH1,CSF1,EFNB2,F2R,FKBP5,GCH1,HCK,HSF1,IRF3,LGALS9,LPL,NFKBIB,SERPINE1,PLCG2,MAPK8,MAP2K3,PTGS2,CCL2,SYK,TF,VCAM1,VIM,MAPKAPK3,PLA2G6,BCL10,BAIAP2,RBCK1,PDCD4,BAIAP2L1,SIRPA,PALM3	33/703
13_Member	GO Biological Processes	GO:0071222	cellular response to lipopolysaccharide	-4.50575	-2.473	558,1948,3055,3297,3661,4793,5054,5336,5599,5606,6347,7431,8915,27250,140885	AXL,EFNB2,HCK,HSF1,IRF3,NFKBIB,SERPINE1,PLCG2,MAPK8,MAP2K3,CCL2,VIM,BCL10,PDCD4,SIRPA	15/212
13_Member	GO Biological Processes	GO:0071219	cellular response to molecule of bacterial origin	-4.20939	-2.27076	558,1948,3055,3297,3661,4793,5054,5336,5599,5606,6347,7431,8915,27250,140885	AXL,EFNB2,HCK,HSF1,IRF3,NFKBIB,SERPINE1,PLCG2,MAPK8,MAP2K3,CCL2,VIM,BCL10,PDCD4,SIRPA	15/225
13_Member	GO Biological Processes	GO:0071216	cellular response to biotic stimulus	-4.19671	-2.26313	558,1948,3055,3297,3661,4793,5054,5336,5599,5606,6347,6850,7431,8915,27250,140885	AXL,EFNB2,HCK,HSF1,IRF3,NFKBIB,SERPINE1,PLCG2,MAPK8,MAP2K3,CCL2,SYK,VIM,BCL10,PDCD4,SIRPA	16/252
13_Member	GO Biological Processes	GO:0071396	cellular response to lipid	-3.52854	-1.79803	90,301,558,1605,1948,3055,3297,3661,4023,4793,5054,5336,5599,5606,6347,6696,6850,7431,8031,8644,8915,27250,51389,140885	ACVR1,ANXA1,AXL,DAG1,EFNB2,HCK,HSF1,IRF3,LPL,NFKBIB,SERPINE1,PLCG2,MAPK8,MAP2K3,CCL2,SPP1,SYK,VIM,NCOA4,AKR1C3,BCL10,PDCD4,RWDD1,SIRPA	24/537
14_Summary	GO Biological Processes	GO:0009123	nucleoside monophosphate metabolic process	-8.38976	-5.48768	205,318,471,790,1723,2618,2987,3614,5471,6470,7372,26289,55312,1120,2171,2643,5336,6785,8398,9942,10201,22876,23761,51422,55163,79717,80157,83666,84879,154141,254531,349565,2583,2650,3036,5372,8706,10020,27090,54790,64841,79053,84892,166012,256281,374378,481,5151,6120,11164,23171,25796,29789,84836	AK4,NUDT2,ATIC,CAD,DHODH,GART,GUK1,IMPDH1,PPAT,SHMT1,UMPS,AK5,RFK,CHKB,FABP5,GCH1,PLCG2,ELOVL4,PLA2G6,XYLB,NME6,INPP5F,PISD,PRKAG2,PNPO,PPCS,CWH43,PARP9,MFSD2A,MBOAT1,LPCAT4,NMNAT3,B4GALNT1,GCNT1,HAS1,PMM1,B3GALNT1,GNE,ST6GALNAC4,TET2,GNPNAT1,ALG8,POMGNT2,CHST13,NUDT14,GALNT18,ATP1B1,PDE8A,RPE,NUDT5,GPD1L,PGLS,OLA1,ABHD14B	54/-
14_Member	GO Biological Processes	GO:0009123	nucleoside monophosphate metabolic process	-8.38976	-5.48768	205,318,471,790,1723,2618,2987,3614,5471,6470,7372,26289,55312	AK4,NUDT2,ATIC,CAD,DHODH,GART,GUK1,IMPDH1,PPAT,SHMT1,UMPS,AK5,RFK	13/76
14_Member	Reactome Gene Sets	R-HSA-8956320	Nucleotide biosynthesis	-8.38508	-5.48768	471,790,1723,2618,3614,5471,7372	ATIC,CAD,DHODH,GART,IMPDH1,PPAT,UMPS	7/14
14_Member	GO Biological Processes	GO:0009124	nucleoside monophosphate biosynthetic process	-8.04923	-5.21918	318,471,790,1723,2618,3614,5471,6470,7372,55312	NUDT2,ATIC,CAD,DHODH,GART,IMPDH1,PPAT,SHMT1,UMPS,RFK	10/42
14_Member	GO Biological Processes	GO:0009156	ribonucleoside monophosphate biosynthetic process	-7.74056	-4.98307	318,471,790,1723,2618,3614,5471,7372,55312	NUDT2,ATIC,CAD,DHODH,GART,IMPDH1,PPAT,UMPS,RFK	9/34
14_Member	GO Biological Processes	GO:0009161	ribonucleoside monophosphate metabolic process	-7.59947	-4.85297	205,318,471,790,1723,2618,2987,3614,5471,7372,55312	AK4,NUDT2,ATIC,CAD,DHODH,GART,GUK1,IMPDH1,PPAT,UMPS,RFK	11/59
14_Member	GO Biological Processes	GO:0090407	organophosphate biosynthetic process	-7.06845	-4.44417	205,318,471,790,1120,1723,2171,2618,2643,2987,3614,5336,5471,6470,6785,7372,8398,9942,10201,22876,23761,26289,51422,55163,55312,79717,80157,83666,84879,154141,254531,349565	AK4,NUDT2,ATIC,CAD,CHKB,DHODH,FABP5,GART,GCH1,GUK1,IMPDH1,PLCG2,PPAT,SHMT1,ELOVL4,UMPS,PLA2G6,XYLB,NME6,INPP5F,PISD,AK5,PRKAG2,PNPO,RFK,PPCS,CWH43,PARP9,MFSD2A,MBOAT1,LPCAT4,NMNAT3	32/541
14_Member	GO Biological Processes	GO:1901137	carbohydrate derivative biosynthetic process	-6.64261	-4.1136	205,318,471,790,1723,2583,2618,2650,2987,3036,3614,5372,5471,6470,6785,7372,8706,9942,10020,10201,26289,27090,51422,54790,55312,64841,79053,79717,80157,84892,166012,256281,374378	AK4,NUDT2,ATIC,CAD,DHODH,B4GALNT1,GART,GCNT1,GUK1,HAS1,IMPDH1,PMM1,PPAT,SHMT1,ELOVL4,UMPS,B3GALNT1,XYLB,GNE,NME6,AK5,ST6GALNAC4,PRKAG2,TET2,RFK,GNPNAT1,ALG8,PPCS,CWH43,POMGNT2,CHST13,NUDT14,GALNT18	33/594
14_Member	GO Biological Processes	GO:0055086	nucleobase-containing small molecule metabolic process	-6.32621	-3.87528	205,318,471,481,790,1723,2618,2987,3614,5151,5372,5471,6120,6470,6785,7372,10020,10201,11164,23171,25796,26289,29789,51422,55312,64841,79717,83666,84836,256281,349565	AK4,NUDT2,ATIC,ATP1B1,CAD,DHODH,GART,GUK1,IMPDH1,PDE8A,PMM1,PPAT,RPE,SHMT1,ELOVL4,UMPS,GNE,NME6,NUDT5,GPD1L,PGLS,AK5,OLA1,PRKAG2,RFK,GNPNAT1,PPCS,PARP9,ABHD14B,NUDT14,NMNAT3	31/555
14_Member	GO Biological Processes	GO:0006753	nucleoside phosphate metabolic process	-6.01718	-3.63711	205,318,471,481,790,1723,2618,2987,3614,5151,5471,6120,6470,6785,7372,10201,11164,23171,25796,26289,29789,51422,55312,79717,83666,84836,256281,349565	AK4,NUDT2,ATIC,ATP1B1,CAD,DHODH,GART,GUK1,IMPDH1,PDE8A,PPAT,RPE,SHMT1,ELOVL4,UMPS,NME6,NUDT5,GPD1L,PGLS,AK5,OLA1,PRKAG2,RFK,PPCS,PARP9,ABHD14B,NUDT14,NMNAT3	28/487
14_Member	GO Biological Processes	GO:0009117	nucleotide metabolic process	-5.67923	-3.36638	205,318,471,481,790,1723,2618,2987,3614,5151,5471,6120,6470,6785,7372,10201,11164,23171,25796,26289,29789,51422,55312,79717,83666,84836,349565	AK4,NUDT2,ATIC,ATP1B1,CAD,DHODH,GART,GUK1,IMPDH1,PDE8A,PPAT,RPE,SHMT1,ELOVL4,UMPS,NME6,NUDT5,GPD1L,PGLS,AK5,OLA1,PRKAG2,RFK,PPCS,PARP9,ABHD14B,NMNAT3	27/478
14_Member	GO Biological Processes	GO:0009165	nucleotide biosynthetic process	-5.6767	-3.36638	205,318,471,790,1723,2618,2987,3614,5471,6470,6785,7372,10201,26289,51422,55312,79717,83666,349565	AK4,NUDT2,ATIC,CAD,DHODH,GART,GUK1,IMPDH1,PPAT,SHMT1,ELOVL4,UMPS,NME6,AK5,PRKAG2,RFK,PPCS,PARP9,NMNAT3	19/263
14_Member	GO Biological Processes	GO:1901293	nucleoside phosphate biosynthetic process	-5.62821	-3.33494	205,318,471,790,1723,2618,2987,3614,5471,6470,6785,7372,10201,26289,51422,55312,79717,83666,349565	AK4,NUDT2,ATIC,CAD,DHODH,GART,GUK1,IMPDH1,PPAT,SHMT1,ELOVL4,UMPS,NME6,AK5,PRKAG2,RFK,PPCS,PARP9,NMNAT3	19/265
14_Member	Reactome Gene Sets	R-HSA-15869	Metabolism of nucleotides	-5.26345	-3.05791	205,471,790,1723,2618,2987,3614,5471,7372,11164,26289	AK4,ATIC,CAD,DHODH,GART,GUK1,IMPDH1,PPAT,UMPS,NUDT5,AK5	11/99
14_Member	GO Biological Processes	GO:0019693	ribose phosphate metabolic process	-5.10508	-2.92384	205,318,471,481,790,1723,2618,2987,3614,5151,5471,6785,7372,10201,11164,26289,29789,51422,55312,79717,84836,256281	AK4,NUDT2,ATIC,ATP1B1,CAD,DHODH,GART,GUK1,IMPDH1,PDE8A,PPAT,ELOVL4,UMPS,NME6,NUDT5,AK5,OLA1,PRKAG2,RFK,PPCS,ABHD14B,NUDT14	22/369
14_Member	GO Biological Processes	GO:0009259	ribonucleotide metabolic process	-4.75934	-2.67259	205,318,471,481,790,1723,2618,2987,3614,5151,5471,6785,7372,10201,11164,26289,29789,51422,55312,79717,84836	AK4,NUDT2,ATIC,ATP1B1,CAD,DHODH,GART,GUK1,IMPDH1,PDE8A,PPAT,ELOVL4,UMPS,NME6,NUDT5,AK5,OLA1,PRKAG2,RFK,PPCS,ABHD14B	21/360
14_Member	GO Biological Processes	GO:0009260	ribonucleotide biosynthetic process	-4.60205	-2.53905	205,318,471,790,1723,2618,3614,5471,6785,7372,10201,26289,51422,55312,79717	AK4,NUDT2,ATIC,CAD,DHODH,GART,IMPDH1,PPAT,ELOVL4,UMPS,NME6,AK5,PRKAG2,RFK,PPCS	15/208
14_Member	GO Biological Processes	GO:0046390	ribose phosphate biosynthetic process	-4.43516	-2.42704	205,318,471,790,1723,2618,3614,5471,6785,7372,10201,26289,51422,55312,79717	AK4,NUDT2,ATIC,CAD,DHODH,GART,IMPDH1,PPAT,ELOVL4,UMPS,NME6,AK5,PRKAG2,RFK,PPCS	15/215
14_Member	GO Biological Processes	GO:0072521	purine-containing compound metabolic process	-4.25233	-2.30546	205,318,471,481,2618,2987,3614,5151,5471,6120,6470,6785,10201,11164,23171,25796,26289,29789,51422,79717,83666,84836,349565	AK4,NUDT2,ATIC,ATP1B1,GART,GUK1,IMPDH1,PDE8A,PPAT,RPE,SHMT1,ELOVL4,NME6,NUDT5,GPD1L,PGLS,AK5,OLA1,PRKAG2,PPCS,PARP9,ABHD14B,NMNAT3	23/450
14_Member	GO Biological Processes	GO:0006163	purine nucleotide metabolic process	-4.24919	-2.30546	205,318,471,481,2618,2987,3614,5151,5471,6120,6785,10201,11164,23171,25796,26289,29789,51422,79717,83666,84836,349565	AK4,NUDT2,ATIC,ATP1B1,GART,GUK1,IMPDH1,PDE8A,PPAT,RPE,ELOVL4,NME6,NUDT5,GPD1L,PGLS,AK5,OLA1,PRKAG2,PPCS,PARP9,ABHD14B,NMNAT3	22/420
14_Member	KEGG Pathway	hsa00230	Purine metabolism	-4.20696	-2.27002	205,318,471,2618,2987,3614,5151,5471,10201,11164,26289	AK4,NUDT2,ATIC,GART,GUK1,IMPDH1,PDE8A,PPAT,NME6,NUDT5,AK5	11/128
14_Member	GO Biological Processes	GO:0072522	purine-containing compound biosynthetic process	-3.93614	-2.07613	205,318,471,2618,2987,3614,5471,6470,6785,10201,26289,51422,79717,83666,349565	AK4,NUDT2,ATIC,GART,GUK1,IMPDH1,PPAT,SHMT1,ELOVL4,NME6,AK5,PRKAG2,PPCS,PARP9,NMNAT3	15/238
14_Member	GO Biological Processes	GO:0006164	purine nucleotide biosynthetic process	-3.57702	-1.82725	205,318,471,2618,2987,3614,5471,6785,10201,26289,51422,79717,83666,349565	AK4,NUDT2,ATIC,GART,GUK1,IMPDH1,PPAT,ELOVL4,NME6,AK5,PRKAG2,PPCS,PARP9,NMNAT3	14/229
14_Member	GO Biological Processes	GO:0009150	purine ribonucleotide metabolic process	-3.1763	-1.55866	205,318,471,481,2618,2987,3614,5151,5471,6785,10201,11164,26289,29789,51422,79717,84836	AK4,NUDT2,ATIC,ATP1B1,GART,GUK1,IMPDH1,PDE8A,PPAT,ELOVL4,NME6,NUDT5,AK5,OLA1,PRKAG2,PPCS,ABHD14B	17/341
14_Member	GO Biological Processes	GO:0009199	ribonucleoside triphosphate metabolic process	-2.99637	-1.42873	205,318,481,790,3614,10201,11164,26289,29789,51422	AK4,NUDT2,ATP1B1,CAD,IMPDH1,NME6,NUDT5,AK5,OLA1,PRKAG2	10/150
14_Member	GO Biological Processes	GO:0009152	purine ribonucleotide biosynthetic process	-2.67165	-1.2124	205,318,471,2618,3614,5471,6785,10201,26289,51422,79717	AK4,NUDT2,ATIC,GART,IMPDH1,PPAT,ELOVL4,NME6,AK5,PRKAG2,PPCS	11/194
14_Member	GO Biological Processes	GO:0009141	nucleoside triphosphate metabolic process	-2.64817	-1.19448	205,318,481,790,3614,10201,11164,26289,29789,51422	AK4,NUDT2,ATP1B1,CAD,IMPDH1,NME6,NUDT5,AK5,OLA1,PRKAG2	10/167
14_Member	GO Biological Processes	GO:0009205	purine ribonucleoside triphosphate metabolic process	-2.58003	-1.14381	205,318,481,3614,10201,11164,26289,29789,51422	AK4,NUDT2,ATP1B1,IMPDH1,NME6,NUDT5,AK5,OLA1,PRKAG2	9/143
14_Member	GO Biological Processes	GO:0009144	purine nucleoside triphosphate metabolic process	-2.48019	-1.07265	205,318,481,3614,10201,11164,26289,29789,51422	AK4,NUDT2,ATP1B1,IMPDH1,NME6,NUDT5,AK5,OLA1,PRKAG2	9/148
14_Member	GO Biological Processes	GO:0009142	nucleoside triphosphate biosynthetic process	-2.062	-0.764206	205,318,790,3614,10201,26289,51422	AK4,NUDT2,CAD,IMPDH1,NME6,AK5,PRKAG2	7/114
15_Summary	GO Biological Processes	GO:0043408	regulation of MAPK cascade	-8.37384	-5.48768	408,409,467,634,958,1445,1464,1490,1601,1605,1845,2149,2324,2911,3491,3725,3791,3965,4282,4609,5151,5156,5336,5606,5795,6347,6657,6789,6850,7057,7345,10253,10298,27250,27347,51347,56919,114897,140885,195827,90,558,1435,3297,5743,7018,7410,8091,8398,8915,10040,11200,30844,51422,57045,83666,440275,104,641,6654,7453,51637,9314,11232,84259	ARRB1,ARRB2,ATF3,CEACAM1,CD40,CSK,CSPG4,CCN2,DAB2,DAG1,DUSP3,F2R,FLT4,GRM1,CCN1,JUN,KDR,LGALS9,MIF,MYC,PDE8A,PDGFRA,PLCG2,MAP2K3,PTPRJ,CCL2,SOX2,STK4,SYK,THBS1,UCHL1,SPRY2,PAK4,PDCD4,STK39,TAOK3,DHX33,C1QTNF1,SIRPA,PRXL2C,ACVR1,AXL,CSF1,HSF1,PTGS2,TF,VAV2,HMGA2,PLA2G6,BCL10,TOM1L1,CHEK2,EHD4,PRKAG2,TWSG1,PARP9,EIF2AK4,ADARB1,BLM,SOS1,WARS1,RTRAF,KLF4,POLG2,DCUN1D5	65/-
15_Member	GO Biological Processes	GO:0043408	regulation of MAPK cascade	-8.37384	-5.48768	408,409,467,634,958,1445,1464,1490,1601,1605,1845,2149,2324,2911,3491,3725,3791,3965,4282,4609,5151,5156,5336,5606,5795,6347,6657,6789,6850,7057,7345,10253,10298,27250,27347,51347,56919,114897,140885,195827	ARRB1,ARRB2,ATF3,CEACAM1,CD40,CSK,CSPG4,CCN2,DAB2,DAG1,DUSP3,F2R,FLT4,GRM1,CCN1,JUN,KDR,LGALS9,MIF,MYC,PDE8A,PDGFRA,PLCG2,MAP2K3,PTPRJ,CCL2,SOX2,STK4,SYK,THBS1,UCHL1,SPRY2,PAK4,PDCD4,STK39,TAOK3,DHX33,C1QTNF1,SIRPA,PRXL2C	40/694
15_Member	GO Biological Processes	GO:0070372	regulation of ERK1 and ERK2 cascade	-6.24826	-3.80819	408,409,467,634,1445,1490,1601,1845,2149,2324,3491,3725,3791,3965,4282,5151,5156,6347,6850,10253,140885,195827	ARRB1,ARRB2,ATF3,CEACAM1,CSK,CCN2,DAB2,DUSP3,F2R,FLT4,CCN1,JUN,KDR,LGALS9,MIF,PDE8A,PDGFRA,CCL2,SYK,SPRY2,SIRPA,PRXL2C	22/314
15_Member	GO Biological Processes	GO:0042327	positive regulation of phosphorylation	-6.21986	-3.78512	90,408,409,558,958,1435,1445,1464,1490,1601,1605,2324,3297,3491,3791,4282,5156,5336,5606,5743,5795,6789,6850,7018,7057,7410,8091,8398,8915,10040,10253,11200,30844,51347,51422,57045,83666,440275	ACVR1,ARRB1,ARRB2,AXL,CD40,CSF1,CSK,CSPG4,CCN2,DAB2,DAG1,FLT4,HSF1,CCN1,KDR,MIF,PDGFRA,PLCG2,MAP2K3,PTGS2,PTPRJ,STK4,SYK,TF,THBS1,VAV2,HMGA2,PLA2G6,BCL10,TOM1L1,SPRY2,CHEK2,EHD4,TAOK3,PRKAG2,TWSG1,PARP9,EIF2AK4	38/773
15_Member	GO Biological Processes	GO:0043410	positive regulation of MAPK cascade	-5.89604	-3.5518	408,409,958,1445,1464,1490,2149,2324,2911,3725,3791,3965,4282,5151,5156,5336,5606,5795,6347,6657,6850,7057,10253,27347,51347,56919,114897,195827	ARRB1,ARRB2,CD40,CSK,CSPG4,CCN2,F2R,FLT4,GRM1,JUN,KDR,LGALS9,MIF,PDE8A,PDGFRA,PLCG2,MAP2K3,PTPRJ,CCL2,SOX2,SYK,THBS1,SPRY2,STK39,TAOK3,DHX33,C1QTNF1,PRXL2C	28/494
15_Member	GO Biological Processes	GO:0001934	positive regulation of protein phosphorylation	-4.92315	-2.81012	90,408,409,958,1435,1445,1464,1490,1601,1605,2324,3297,3491,3791,4282,5336,5606,5743,5795,6789,6850,7057,8091,8398,10040,10253,11200,30844,51347,51422,57045,83666,440275	ACVR1,ARRB1,ARRB2,CD40,CSF1,CSK,CSPG4,CCN2,DAB2,DAG1,FLT4,HSF1,CCN1,KDR,MIF,PLCG2,MAP2K3,PTGS2,PTPRJ,STK4,SYK,THBS1,HMGA2,PLA2G6,TOM1L1,SPRY2,CHEK2,EHD4,TAOK3,PRKAG2,TWSG1,PARP9,EIF2AK4	33/714
15_Member	GO Biological Processes	GO:0043549	regulation of kinase activity	-3.76035	-1.96447	104,558,634,641,958,1435,1445,1601,1605,1845,2324,3491,3791,4282,5156,5606,5795,6654,6850,7057,7345,7410,7453,8091,10040,10253,27250,51347,51422,51637	ADARB1,AXL,CEACAM1,BLM,CD40,CSF1,CSK,DAB2,DAG1,DUSP3,FLT4,CCN1,KDR,MIF,PDGFRA,MAP2K3,PTPRJ,SOS1,SYK,THBS1,UCHL1,VAV2,WARS1,HMGA2,TOM1L1,SPRY2,PDCD4,TAOK3,PRKAG2,RTRAF	30/717
15_Member	GO Biological Processes	GO:0070374	positive regulation of ERK1 and ERK2 cascade	-3.73594	-1.94368	408,409,1490,2149,2324,3725,3791,3965,4282,5151,5156,6347,10253,195827	ARRB1,ARRB2,CCN2,F2R,FLT4,JUN,KDR,LGALS9,MIF,PDE8A,PDGFRA,CCL2,SPRY2,PRXL2C	14/221
15_Member	GO Biological Processes	GO:0045859	regulation of protein kinase activity	-2.97472	-1.4147	104,634,641,958,1435,1445,1601,1605,1845,3491,4282,5606,5795,6654,6850,7057,7345,7453,8091,10040,10253,27250,51347,51422,51637	ADARB1,CEACAM1,BLM,CD40,CSF1,CSK,DAB2,DAG1,DUSP3,CCN1,MIF,MAP2K3,PTPRJ,SOS1,SYK,THBS1,UCHL1,WARS1,HMGA2,TOM1L1,SPRY2,PDCD4,TAOK3,PRKAG2,RTRAF	25/623
15_Member	GO Biological Processes	GO:0051347	positive regulation of transferase activity	-2.94092	-1.39308	558,958,1435,1445,1605,2324,3491,3791,4282,4609,5156,5606,6850,7057,7410,8091,9314,10040,11232,51347,51422,84259	AXL,CD40,CSF1,CSK,DAG1,FLT4,CCN1,KDR,MIF,MYC,PDGFRA,MAP2K3,SYK,THBS1,VAV2,HMGA2,KLF4,TOM1L1,POLG2,TAOK3,PRKAG2,DCUN1D5	22/523
15_Member	GO Biological Processes	GO:0043405	regulation of MAP kinase activity	-2.81589	-1.30806	958,1445,4282,5795,6654,6850,7057,7345,10253,27250,51347	CD40,CSK,MIF,PTPRJ,SOS1,SYK,THBS1,UCHL1,SPRY2,PDCD4,TAOK3	11/186
15_Member	GO Biological Processes	GO:0033674	positive regulation of kinase activity	-2.49671	-1.08753	558,958,1435,1445,1605,2324,3491,3791,4282,5156,5606,6850,7057,7410,8091,10040,51347,51422	AXL,CD40,CSF1,CSK,DAG1,FLT4,CCN1,KDR,MIF,PDGFRA,MAP2K3,SYK,THBS1,VAV2,HMGA2,TOM1L1,TAOK3,PRKAG2	18/429
16_Summary	GO Biological Processes	GO:0046777	protein autophosphorylation	-7.95582	-5.16356	790,1445,1612,2049,2324,3055,3791,5156,6789,6850,7867,9833,11200,27347,29904,51347,60673,79834,440275,90,558,2202,5129,5599,5603,5606,6347,10298,26750,51422,57118,57410,140901,284217,1634,1725,4015,4801,5481,10322,27351,28989,51126,51303,64769,79918,84661,84695,221143,254887,399818	CAD,CSK,DAPK1,EPHB3,FLT4,HCK,KDR,PDGFRA,STK4,SYK,MAPKAPK3,MELK,CHEK2,STK39,EEF2K,TAOK3,ATG101,PEAK1,EIF2AK4,ACVR1,AXL,EFEMP1,CDK18,MAPK8,MAPK13,MAP2K3,CCL2,PAK4,RPS6KC1,PRKAG2,CAMK1D,SCYL1,STK35,LAMA1,DCN,DHPS,LOX,NFYB,PPID,SMYD5,DESI1,NTMT1,NAA20,FKBP11,MEAF6,SETD6,DPY30,LOXL3,EEF1AKMT1,ZDHHC23,EEF1AKMT2	51/-
16_Member	GO Biological Processes	GO:0046777	protein autophosphorylation	-7.95582	-5.16356	790,1445,1612,2049,2324,3055,3791,5156,6789,6850,7867,9833,11200,27347,29904,51347,60673,79834,440275	CAD,CSK,DAPK1,EPHB3,FLT4,HCK,KDR,PDGFRA,STK4,SYK,MAPKAPK3,MELK,CHEK2,STK39,EEF2K,TAOK3,ATG101,PEAK1,EIF2AK4	19/188
16_Member	GO Biological Processes	GO:0006468	protein phosphorylation	-5.62097	-3.33494	90,558,790,1445,1612,2049,2202,2324,3055,3791,5129,5156,5599,5603,5606,6347,6789,6850,7867,9833,10298,11200,26750,27347,29904,51347,51422,57118,57410,60673,79834,140901,284217,440275	ACVR1,AXL,CAD,CSK,DAPK1,EPHB3,EFEMP1,FLT4,HCK,KDR,CDK18,PDGFRA,MAPK8,MAPK13,MAP2K3,CCL2,STK4,SYK,MAPKAPK3,MELK,PAK4,CHEK2,RPS6KC1,STK39,EEF2K,TAOK3,PRKAG2,CAMK1D,SCYL1,ATG101,PEAK1,STK35,LAMA1,EIF2AK4	34/692
16_Member	GO Biological Processes	GO:0018193	peptidyl-amino acid modification	-4.39342	-2.40529	90,790,1634,1725,2202,2324,3055,3791,4015,4801,5156,5481,5599,5603,6789,6850,7867,10322,11200,27347,27351,28989,51126,51303,57118,64769,79918,84661,84695,221143,254887,399818	ACVR1,CAD,DCN,DHPS,EFEMP1,FLT4,HCK,KDR,LOX,NFYB,PDGFRA,PPID,MAPK8,MAPK13,STK4,SYK,MAPKAPK3,SMYD5,CHEK2,STK39,DESI1,NTMT1,NAA20,FKBP11,CAMK1D,MEAF6,SETD6,DPY30,LOXL3,EEF1AKMT1,ZDHHC23,EEF1AKMT2	32/726
16_Member	GO Biological Processes	GO:0018209	peptidyl-serine modification	-2.07077	-0.768692	1634,5599,5603,6789,6850,7867,11200,27347,28989,57118	DCN,MAPK8,MAPK13,STK4,SYK,MAPKAPK3,CHEK2,STK39,NTMT1,CAMK1D	10/202
17_Summary	GO Biological Processes	GO:0006760	folic acid-containing compound metabolic process	-7.51124	-4.78593	471,2356,2618,2643,4548,4552,6470,8836,1428,2593,5625,10404,154141,254531,790,1723,5471,7372,1788,27430,3614,4144,7172,205,318,2987,2731,5723,29968	ATIC,FPGS,GART,GCH1,MTR,MTRR,SHMT1,GGH,CRYM,GAMT,PRODH,CPQ,MBOAT1,LPCAT4,CAD,DHODH,PPAT,UMPS,DNMT3A,MAT2B,IMPDH1,MAT2A,TPMT,AK4,NUDT2,GUK1,GLDC,PSPH,PSAT1	29/-
17_Member	GO Biological Processes	GO:0006760	folic acid-containing compound metabolic process	-7.51124	-4.78593	471,2356,2618,2643,4548,4552,6470,8836	ATIC,FPGS,GART,GCH1,MTR,MTRR,SHMT1,GGH	8/26
17_Member	GO Biological Processes	GO:0006575	cellular modified amino acid metabolic process	-6.93797	-4.32978	471,1428,2356,2593,2618,2643,4548,4552,5625,6470,8836,10404,154141,254531	ATIC,CRYM,FPGS,GAMT,GART,GCH1,MTR,MTRR,PRODH,SHMT1,GGH,CPQ,MBOAT1,LPCAT4	14/117
17_Member	GO Biological Processes	GO:0042558	pteridine-containing compound metabolic process	-6.72962	-4.1804	471,2356,2618,2643,4548,4552,6470,8836	ATIC,FPGS,GART,GCH1,MTR,MTRR,SHMT1,GGH	8/32
17_Member	GO Biological Processes	GO:0046112	nucleobase biosynthetic process	-5.99113	-3.62029	790,1723,2618,5471,6470,7372	CAD,DHODH,GART,PPAT,SHMT1,UMPS	6/18
17_Member	WikiPathways	WP241	One-carbon metabolism	-5.84211	-3.50215	471,1788,2618,4548,4552,6470,27430	ATIC,DNMT3A,GART,MTR,MTRR,SHMT1,MAT2B	7/29
17_Member	WikiPathways	WP4224	Purine metabolism and related disorders	-5.41699	-3.18571	471,2618,3614,4144,5471,7172	ATIC,GART,IMPDH1,MAT2A,PPAT,TPMT	6/22
17_Member	GO Biological Processes	GO:0009396	folic acid-containing compound biosynthetic process	-4.95998	-2.83436	471,2356,2618,2643	ATIC,FPGS,GART,GCH1	4/8
17_Member	GO Biological Processes	GO:0046653	tetrahydrofolate metabolic process	-4.9131	-2.80259	471,2618,2643,4548,6470	ATIC,GART,GCH1,MTR,SHMT1	5/16
17_Member	GO Biological Processes	GO:0009167	purine ribonucleoside monophosphate metabolic process	-4.70357	-2.62219	205,318,471,2618,2987,3614,5471	AK4,NUDT2,ATIC,GART,GUK1,IMPDH1,PPAT	7/42
17_Member	GO Biological Processes	GO:0009126	purine nucleoside monophosphate metabolic process	-4.56637	-2.5182	205,318,471,2618,2987,3614,5471	AK4,NUDT2,ATIC,GART,GUK1,IMPDH1,PPAT	7/44
17_Member	GO Biological Processes	GO:0009168	purine ribonucleoside monophosphate biosynthetic process	-4.39212	-2.40529	318,471,2618,3614,5471	NUDT2,ATIC,GART,IMPDH1,PPAT	5/20
17_Member	Reactome Gene Sets	R-HSA-73817	Purine ribonucleoside monophosphate biosynthesis	-4.30765	-2.34291	471,2618,3614,5471	ATIC,GART,IMPDH1,PPAT	4/11
17_Member	GO Biological Processes	GO:0009112	nucleobase metabolic process	-4.25088	-2.30546	790,1723,2618,5471,6470,7372	CAD,DHODH,GART,PPAT,SHMT1,UMPS	6/34
17_Member	GO Biological Processes	GO:0009127	purine nucleoside monophosphate biosynthetic process	-4.17662	-2.24753	318,471,2618,3614,5471	NUDT2,ATIC,GART,IMPDH1,PPAT	5/22
17_Member	GO Biological Processes	GO:0042559	pteridine-containing compound biosynthetic process	-3.9859	-2.10716	471,2356,2618,2643	ATIC,FPGS,GART,GCH1	4/13
17_Member	GO Biological Processes	GO:0046033	AMP metabolic process	-3.89362	-2.05157	205,318,471,2618,5471	AK4,NUDT2,ATIC,GART,PPAT	5/25
17_Member	GO Biological Processes	GO:0006167	AMP biosynthetic process	-3.84678	-2.01805	318,471,2618,5471	NUDT2,ATIC,GART,PPAT	4/14
17_Member	GO Biological Processes	GO:0006177	GMP biosynthetic process	-3.84678	-2.01805	471,2618,3614,5471	ATIC,GART,IMPDH1,PPAT	4/14
17_Member	GO Biological Processes	GO:0006189	'de novo' IMP biosynthetic process	-3.80043	-1.99157	471,2618,5471	ATIC,GART,PPAT	3/6
17_Member	GO Biological Processes	GO:0046654	tetrahydrofolate biosynthetic process	-3.80043	-1.99157	471,2618,2643	ATIC,GART,GCH1	3/6
17_Member	GO Biological Processes	GO:0042398	cellular modified amino acid biosynthetic process	-3.72646	-1.9413	471,2356,2593,2618,2643	ATIC,FPGS,GAMT,GART,GCH1	5/27
17_Member	GO Biological Processes	GO:0046037	GMP metabolic process	-3.72646	-1.9413	471,2618,2987,3614,5471	ATIC,GART,GUK1,IMPDH1,PPAT	5/27
17_Member	GO Biological Processes	GO:0097292	XMP metabolic process	-3.564	-1.8261	471,2618,5471	ATIC,GART,PPAT	3/7
17_Member	GO Biological Processes	GO:0097293	XMP biosynthetic process	-3.564	-1.8261	471,2618,5471	ATIC,GART,PPAT	3/7
17_Member	GO Biological Processes	GO:0097294	'de novo' XMP biosynthetic process	-3.564	-1.8261	471,2618,5471	ATIC,GART,PPAT	3/7
17_Member	KEGG Pathway	hsa01523	Antifolate resistance	-3.50143	-1.78239	471,2356,2618,6470,8836	ATIC,FPGS,GART,SHMT1,GGH	5/30
17_Member	GO Biological Processes	GO:0044208	'de novo' AMP biosynthetic process	-3.36647	-1.69114	471,2618,5471	ATIC,GART,PPAT	3/8
17_Member	WikiPathways	WP4259	Disorders of folate metabolism and transport	-3.29382	-1.63811	471,2618,4548,6470	ATIC,GART,MTR,SHMT1	4/19
17_Member	KEGG Pathway	hsa00670	One carbon pool by folate	-3.20389	-1.57879	471,2618,4548,6470	ATIC,GART,MTR,SHMT1	4/20
17_Member	GO Biological Processes	GO:0009113	purine nucleobase biosynthetic process	-3.04864	-1.46835	2618,5471,6470	GART,PPAT,SHMT1	3/10
17_Member	GO Biological Processes	GO:0009069	serine family amino acid metabolic process	-2.96014	-1.40815	2618,2731,5723,6470,29968	GART,GLDC,PSPH,SHMT1,PSAT1	5/39
17_Member	GO Biological Processes	GO:0006188	IMP biosynthetic process	-2.91691	-1.37724	471,2618,5471	ATIC,GART,PPAT	3/11
17_Member	GO Biological Processes	GO:0006544	glycine metabolic process	-2.34118	-0.969434	2618,2731,6470	GART,GLDC,SHMT1	3/17
17_Member	GO Biological Processes	GO:0046040	IMP metabolic process	-2.26853	-0.916843	471,2618,5471	ATIC,GART,PPAT	3/18
17_Member	GO Biological Processes	GO:0006144	purine nucleobase metabolic process	-2.13634	-0.817979	2618,5471,6470	GART,PPAT,SHMT1	3/20
18_Summary	KEGG Pathway	hsa01230	Biosynthesis of amino acids	-7.45259	-4.7375	95,586,4144,4548,5211,5214,5723,6120,6470,27430,29968,84706,3791,5156,6935,7428,2593,2731,23464,2618,5471,6510,790,4552,25796,6566	ACY1,BCAT1,MAT2A,MTR,PFKL,PFKP,PSPH,RPE,SHMT1,MAT2B,PSAT1,GPT2,KDR,PDGFRA,ZEB1,VHL,GAMT,GLDC,GCAT,GART,PPAT,SLC1A5,CAD,MTRR,PGLS,SLC16A1	26/-
18_Member	KEGG Pathway	hsa01230	Biosynthesis of amino acids	-7.45259	-4.7375	95,586,4144,4548,5211,5214,5723,6120,6470,27430,29968,84706	ACY1,BCAT1,MAT2A,MTR,PFKL,PFKP,PSPH,RPE,SHMT1,MAT2B,PSAT1,GPT2	12/75
18_Member	WikiPathways	WP4018	Clear cell renal cell carcinoma pathways	-4.20387	-2.26861	3791,5156,5211,5214,5723,6470,6935,7428,29968	KDR,PDGFRA,PFKL,PFKP,PSPH,SHMT1,ZEB1,VHL,PSAT1	9/86
18_Member	KEGG Pathway	hsa00260	Glycine, serine and threonine metabolism	-3.84016	-2.01338	2593,2731,5723,6470,23464,29968	GAMT,GLDC,PSPH,SHMT1,GCAT,PSAT1	6/40
18_Member	WikiPathways	WP4290	Metabolic reprogramming in colon cancer	-3.71938	-1.94107	2618,5211,5471,5723,6510,29968	GART,PFKL,PPAT,PSPH,SLC1A5,PSAT1	6/42
18_Member	WikiPathways	WP5213	Amino acid metabolism in triple-negative breast cancer cells	-3.564	-1.8261	5723,6510,29968	PSPH,SLC1A5,PSAT1	3/7
18_Member	GO Biological Processes	GO:1901607	alpha-amino acid biosynthetic process	-3.38481	-1.70184	586,790,4548,4552,5723,6470,29968	BCAT1,CAD,MTR,MTRR,PSPH,SHMT1,PSAT1	7/67
18_Member	WikiPathways	WP4688	Serine metabolism	-3.36647	-1.69114	5723,6470,29968	PSPH,SHMT1,PSAT1	3/8
18_Member	KEGG Pathway	hsa01200	Carbon metabolism	-3.2441	-1.60481	2731,5211,5214,5723,6120,6470,25796,29968,84706	GLDC,PFKL,PFKP,PSPH,RPE,SHMT1,PGLS,PSAT1,GPT2	9/115
18_Member	GO Biological Processes	GO:0008652	amino acid biosynthetic process	-3.08678	-1.49638	586,790,4548,4552,5723,6470,29968	BCAT1,CAD,MTR,MTRR,PSPH,SHMT1,PSAT1	7/75
18_Member	GO Biological Processes	GO:0006563	L-serine metabolic process	-2.69116	-1.22751	5723,6470,29968	PSPH,SHMT1,PSAT1	3/13
18_Member	WikiPathways	WP5312	Metabolic pathways of fibroblasts	-2.41676	-1.0282	5723,6510,6566,29968	PSPH,SLC1A5,SLC16A1,PSAT1	4/32
18_Member	GO Biological Processes	GO:0009070	serine family amino acid biosynthetic process	-2.0759	-0.772273	5723,6470,29968	PSPH,SHMT1,PSAT1	3/21
19_Summary	GO Biological Processes	GO:0051129	negative regulation of cellular component organization	-7.43648	-4.73138	302,409,999,1400,1445,1601,1948,2670,3297,6696,7013,7057,7431,8260,10040,10201,10253,10471,10509,11075,22876,22902,23258,23370,25791,25802,29103,29767,50848,51451,55226,55937,56896,58526,65078,85415,90102,116985,140885,1382,2049,4192,4858,9314,10458,29904,57118,84879,154141,5420,10630,150465,634,5795,10298,10516,64769,84259,84275,1435,1525,2593,6776,6789	ANXA2,ARRB2,CDH1,CRMP1,CSK,DAB2,EFNB2,GFAP,HSF1,SPP1,TERF1,THBS1,VIM,NAA10,TOM1L1,NME6,SPRY2,PFDN6,SEMA4B,STMN2,INPP5F,RUFY3,DENND5A,ARHGEF18,NGEF,LMOD1,DNAJC15,TMOD2,F11R,LCMT1,NAT10,APOM,DPYSL5,MID1IP1,RTN4R,RHPN2,PHLDB2,ARAP1,SIRPA,CRABP2,EPHB3,MDK,NOVA2,KLF4,BAIAP2,EEF2K,CAMK1D,MFSD2A,MBOAT1,PODXL,PDPN,TTL,CEACAM1,PTPRJ,PAK4,FBLN5,MEAF6,DCUN1D5,SLC25A33,CSF1,CXADR,GAMT,STAT5A,STK4	64/-
19_Member	GO Biological Processes	GO:0051129	negative regulation of cellular component organization	-7.43648	-4.73138	302,409,999,1400,1445,1601,1948,2670,3297,6696,7013,7057,7431,8260,10040,10201,10253,10471,10509,11075,22876,22902,23258,23370,25791,25802,29103,29767,50848,51451,55226,55937,56896,58526,65078,85415,90102,116985,140885	ANXA2,ARRB2,CDH1,CRMP1,CSK,DAB2,EFNB2,GFAP,HSF1,SPP1,TERF1,THBS1,VIM,NAA10,TOM1L1,NME6,SPRY2,PFDN6,SEMA4B,STMN2,INPP5F,RUFY3,DENND5A,ARHGEF18,NGEF,LMOD1,DNAJC15,TMOD2,F11R,LCMT1,NAT10,APOM,DPYSL5,MID1IP1,RTN4R,RHPN2,PHLDB2,ARAP1,SIRPA	39/721
19_Member	GO Biological Processes	GO:0010977	negative regulation of neuron projection development	-5.89768	-3.5518	999,1400,1601,1948,2670,6696,7431,10509,11075,22876,22902,23258,25791,65078	CDH1,CRMP1,DAB2,EFNB2,GFAP,SPP1,VIM,SEMA4B,STMN2,INPP5F,RUFY3,DENND5A,NGEF,RTN4R	14/142
19_Member	GO Biological Processes	GO:0031345	negative regulation of cell projection organization	-5.61162	-3.33494	999,1400,1601,1948,2670,6696,7431,10253,10509,11075,22876,22902,23258,25791,56896,65078	CDH1,CRMP1,DAB2,EFNB2,GFAP,SPP1,VIM,SPRY2,SEMA4B,STMN2,INPP5F,RUFY3,DENND5A,NGEF,DPYSL5,RTN4R	16/194
19_Member	GO Biological Processes	GO:0010975	regulation of neuron projection development	-5.14611	-2.96191	999,1382,1400,1601,1948,2049,2670,4192,4858,6696,7431,9314,10458,10509,11075,22876,22902,23258,25791,29904,56896,57118,65078,84879,154141	CDH1,CRABP2,CRMP1,DAB2,EFNB2,EPHB3,GFAP,MDK,NOVA2,SPP1,VIM,KLF4,BAIAP2,SEMA4B,STMN2,INPP5F,RUFY3,DENND5A,NGEF,EEF2K,DPYSL5,CAMK1D,RTN4R,MFSD2A,MBOAT1	25/452
19_Member	GO Biological Processes	GO:0031344	regulation of cell projection organization	-3.99059	-2.10742	999,1382,1400,1601,1948,2049,2670,4192,4858,5420,6696,7431,9314,10253,10458,10509,10630,11075,22876,22902,23258,25791,29904,56896,57118,65078,84879,116985,154141	CDH1,CRABP2,CRMP1,DAB2,EFNB2,EPHB3,GFAP,MDK,NOVA2,PODXL,SPP1,VIM,KLF4,SPRY2,BAIAP2,SEMA4B,PDPN,STMN2,INPP5F,RUFY3,DENND5A,NGEF,EEF2K,DPYSL5,CAMK1D,RTN4R,MFSD2A,ARAP1,MBOAT1	29/662
19_Member	GO Biological Processes	GO:0120035	regulation of plasma membrane bounded cell projection organization	-3.78599	-1.9815	999,1382,1400,1601,1948,2049,2670,4192,4858,5420,6696,7431,9314,10458,10509,10630,11075,22876,22902,23258,25791,29904,56896,57118,65078,84879,116985,154141	CDH1,CRABP2,CRMP1,DAB2,EFNB2,EPHB3,GFAP,MDK,NOVA2,PODXL,SPP1,VIM,KLF4,BAIAP2,SEMA4B,PDPN,STMN2,INPP5F,RUFY3,DENND5A,NGEF,EEF2K,DPYSL5,CAMK1D,RTN4R,MFSD2A,ARAP1,MBOAT1	28/647
19_Member	GO Biological Processes	GO:0061387	regulation of extent of cell growth	-2.25217	-0.90361	999,1382,6696,10509,22902,65078,150465	CDH1,CRABP2,SPP1,SEMA4B,RUFY3,RTN4R,TTL	7/105
19_Member	GO Biological Processes	GO:0001558	regulation of cell growth	-2.24591	-0.897789	634,999,1382,1601,5795,6696,10201,10298,10509,10516,22902,64769,65078,84259,84275,84879,150465	CEACAM1,CDH1,CRABP2,DAB2,PTPRJ,SPP1,NME6,PAK4,SEMA4B,FBLN5,RUFY3,MEAF6,RTN4R,DCUN1D5,SLC25A33,MFSD2A,TTL	17/419
19_Member	GO Biological Processes	GO:0040008	regulation of growth	-2.06704	-0.768692	634,999,1382,1435,1525,1601,2593,5795,6696,6776,6789,10201,10298,10509,10516,22902,64769,65078,84259,84275,84879,150465	CEACAM1,CDH1,CRABP2,CSF1,CXADR,DAB2,GAMT,PTPRJ,SPP1,STAT5A,STK4,NME6,PAK4,SEMA4B,FBLN5,RUFY3,MEAF6,RTN4R,DCUN1D5,SLC25A33,MFSD2A,TTL	22/620
20_Summary	GO Biological Processes	GO:0098609	cell-cell adhesion	-7.16032	-4.48386	90,214,301,302,634,999,1001,1009,1525,1832,2650,3491,3680,3688,5099,5156,6850,7412,10298,10398,10458,10630,22801,26011,50848,55971,57526,57863,64065,91179,91624,140885,3691,3861,1445,1948,2149,79778,958	ACVR1,ALCAM,ANXA1,ANXA2,CEACAM1,CDH1,CDH3,CDH11,CXADR,DSP,GCNT1,CCN1,ITGA9,ITGB1,PCDH7,PDGFRA,SYK,VCAM1,PAK4,MYL9,BAIAP2,PDPN,ITGA11,TENM4,F11R,BAIAP2L1,PCDH19,CADM3,PERP,SCARF2,NEXN,SIRPA,ITGB4,KRT14,CSK,EFNB2,F2R,MICALL2,CD40	39/-
20_Member	GO Biological Processes	GO:0098609	cell-cell adhesion	-7.16032	-4.48386	90,214,301,302,634,999,1001,1009,1525,1832,2650,3491,3680,3688,5099,5156,6850,7412,10298,10398,10458,10630,22801,26011,50848,55971,57526,57863,64065,91179,91624,140885	ACVR1,ALCAM,ANXA1,ANXA2,CEACAM1,CDH1,CDH3,CDH11,CXADR,DSP,GCNT1,CCN1,ITGA9,ITGB1,PCDH7,PDGFRA,SYK,VCAM1,PAK4,MYL9,BAIAP2,PDPN,ITGA11,TENM4,F11R,BAIAP2L1,PCDH19,CADM3,PERP,SCARF2,NEXN,SIRPA	32/536
20_Member	GO Biological Processes	GO:0098742	cell-cell adhesion via plasma-membrane adhesion molecules	-3.5017	-1.78239	90,214,634,999,1001,1009,1525,3688,5099,7412,26011,57526,57863,91179,91624	ACVR1,ALCAM,CEACAM1,CDH1,CDH3,CDH11,CXADR,ITGB1,PCDH7,VCAM1,TENM4,PCDH19,CADM3,SCARF2,NEXN	15/261
20_Member	Reactome Gene Sets	R-HSA-446728	Cell junction organization	-3.27669	-1.62274	999,1001,1009,3688,3691,3861,50848,57863	CDH1,CDH3,CDH11,ITGB1,ITGB4,KRT14,F11R,CADM3	8/91
20_Member	GO Biological Processes	GO:0034332	adherens junction organization	-3.20471	-1.57879	999,1001,1009,1445,1832,1948	CDH1,CDH3,CDH11,CSK,DSP,EFNB2	6/52
20_Member	Reactome Gene Sets	R-HSA-1500931	Cell-Cell communication	-2.88754	-1.3605	999,1001,1009,3688,3691,3861,50848,57863,140885	CDH1,CDH3,CDH11,ITGB1,ITGB4,KRT14,F11R,CADM3,SIRPA	9/129
20_Member	GO Biological Processes	GO:0045216	cell-cell junction organization	-2.41436	-1.0277	999,1001,1009,1445,1525,1832,1948,2149,64065,79778	CDH1,CDH3,CDH11,CSK,CXADR,DSP,EFNB2,F2R,PERP,MICALL2	10/180
20_Member	Reactome Gene Sets	R-HSA-418990	Adherens junctions interactions	-2.36756	-0.988419	999,1001,1009,57863	CDH1,CDH3,CDH11,CADM3	4/33
20_Member	KEGG Pathway	hsa04514	Cell adhesion molecules	-2.31204	-0.945748	214,958,999,1001,3680,3688,7412,50848,57863	ALCAM,CD40,CDH1,CDH3,ITGA9,ITGB1,VCAM1,F11R,CADM3	9/157
20_Member	GO Biological Processes	GO:0007156	homophilic cell adhesion via plasma membrane adhesion molecules	-2.14084	-0.817979	634,999,1001,1009,3688,5099,57526,57863,91624	CEACAM1,CDH1,CDH3,CDH11,ITGB1,PCDH7,PCDH19,CADM3,NEXN	9/167
20_Member	Reactome Gene Sets	R-HSA-421270	Cell-cell junction organization	-2.01737	-0.73551	999,1001,1009,50848,57863	CDH1,CDH3,CDH11,F11R,CADM3	5/64

## Sheet: Δ9_D3_D0_UP
GroupID	Category	Term	Description	LogP	Log(q-value)	Genes	Symbols	InTerm_InList
1_Summary	KEGG Pathway	hsa01240	Biosynthesis of cofactors	-12.0298	-7.68129	205,249,586,790,1723,2356,2643,4144,5372,6470,7372,8836,10201,26289,27430,29968,55163,55312,79717,349565,318,471,1120,2171,2618,2987,3614,5336,5471,6785,8398,9942,22876,23761,51422,80157,83666,84879,154141,254531,5151,6120,10020,11164,23171,25796,29789,64841,84836,256281,2583,3036,8706,27090,54790,84892,166012	AK4,ALPL,BCAT1,CAD,DHODH,FPGS,GCH1,MAT2A,PMM1,SHMT1,UMPS,GGH,NME6,AK5,MAT2B,PSAT1,PNPO,RFK,PPCS,NMNAT3,NUDT2,ATIC,CHKB,FABP5,GART,GUK1,IMPDH1,PLCG2,PPAT,ELOVL4,PLA2G6,XYLB,INPP5F,PISD,PRKAG2,CWH43,PARP9,MFSD2A,MBOAT1,LPCAT4,PDE8A,RPE,GNE,NUDT5,GPD1L,PGLS,OLA1,GNPNAT1,ABHD14B,NUDT14,B4GALNT1,HAS1,B3GALNT1,ST6GALNAC4,TET2,POMGNT2,CHST13	57/-
1_Member	KEGG Pathway	hsa01240	Biosynthesis of cofactors	-12.0298	-7.68129	205,249,586,790,1723,2356,2643,4144,5372,6470,7372,8836,10201,26289,27430,29968,55163,55312,79717,349565	AK4,ALPL,BCAT1,CAD,DHODH,FPGS,GCH1,MAT2A,PMM1,SHMT1,UMPS,GGH,NME6,AK5,MAT2B,PSAT1,PNPO,RFK,PPCS,NMNAT3	20/153
1_Member	GO Biological Processes	GO:0090407	organophosphate biosynthetic process	-9.2995	-5.79604	205,318,471,790,1120,1723,2171,2618,2643,2987,3614,5336,5471,6470,6785,7372,8398,9942,10201,22876,23761,26289,51422,55163,55312,79717,80157,83666,84879,154141,254531,349565	AK4,NUDT2,ATIC,CAD,CHKB,DHODH,FABP5,GART,GCH1,GUK1,IMPDH1,PLCG2,PPAT,SHMT1,ELOVL4,UMPS,PLA2G6,XYLB,NME6,INPP5F,PISD,AK5,PRKAG2,PNPO,RFK,PPCS,CWH43,PARP9,MFSD2A,MBOAT1,LPCAT4,NMNAT3	32/541
1_Member	GO Biological Processes	GO:0055086	nucleobase-containing small molecule metabolic process	-7.85866	-4.71423	205,318,471,790,1723,2618,2987,3614,5151,5372,5471,6120,6470,6785,7372,10020,10201,11164,23171,25796,26289,29789,51422,55312,64841,79717,83666,84836,256281,349565	AK4,NUDT2,ATIC,CAD,DHODH,GART,GUK1,IMPDH1,PDE8A,PMM1,PPAT,RPE,SHMT1,ELOVL4,UMPS,GNE,NME6,NUDT5,GPD1L,PGLS,AK5,OLA1,PRKAG2,RFK,GNPNAT1,PPCS,PARP9,ABHD14B,NUDT14,NMNAT3	30/555
1_Member	GO Biological Processes	GO:0006753	nucleoside phosphate metabolic process	-7.35416	-4.32782	205,318,471,790,1723,2618,2987,3614,5151,5471,6120,6470,6785,7372,10201,11164,23171,25796,26289,29789,51422,55312,79717,83666,84836,256281,349565	AK4,NUDT2,ATIC,CAD,DHODH,GART,GUK1,IMPDH1,PDE8A,PPAT,RPE,SHMT1,ELOVL4,UMPS,NME6,NUDT5,GPD1L,PGLS,AK5,OLA1,PRKAG2,RFK,PPCS,PARP9,ABHD14B,NUDT14,NMNAT3	27/487
1_Member	GO Biological Processes	GO:1901137	carbohydrate derivative biosynthetic process	-7.20584	-4.21192	205,318,471,790,1723,2583,2618,2987,3036,3614,5372,5471,6470,6785,7372,8706,9942,10020,10201,26289,27090,51422,54790,55312,64841,79717,80157,84892,166012,256281	AK4,NUDT2,ATIC,CAD,DHODH,B4GALNT1,GART,GUK1,HAS1,IMPDH1,PMM1,PPAT,SHMT1,ELOVL4,UMPS,B3GALNT1,XYLB,GNE,NME6,AK5,ST6GALNAC4,PRKAG2,TET2,RFK,GNPNAT1,PPCS,CWH43,POMGNT2,CHST13,NUDT14	30/594
1_Member	GO Biological Processes	GO:0009165	nucleotide biosynthetic process	-7.08806	-4.11971	205,318,471,790,1723,2618,2987,3614,5471,6470,6785,7372,10201,26289,51422,55312,79717,83666,349565	AK4,NUDT2,ATIC,CAD,DHODH,GART,GUK1,IMPDH1,PPAT,SHMT1,ELOVL4,UMPS,NME6,AK5,PRKAG2,RFK,PPCS,PARP9,NMNAT3	19/263
1_Member	GO Biological Processes	GO:1901293	nucleoside phosphate biosynthetic process	-7.03633	-4.08571	205,318,471,790,1723,2618,2987,3614,5471,6470,6785,7372,10201,26289,51422,55312,79717,83666,349565	AK4,NUDT2,ATIC,CAD,DHODH,GART,GUK1,IMPDH1,PPAT,SHMT1,ELOVL4,UMPS,NME6,AK5,PRKAG2,RFK,PPCS,PARP9,NMNAT3	19/265
1_Member	GO Biological Processes	GO:0009117	nucleotide metabolic process	-6.9413	-4.02411	205,318,471,790,1723,2618,2987,3614,5151,5471,6120,6470,6785,7372,10201,11164,23171,25796,26289,29789,51422,55312,79717,83666,84836,349565	AK4,NUDT2,ATIC,CAD,DHODH,GART,GUK1,IMPDH1,PDE8A,PPAT,RPE,SHMT1,ELOVL4,UMPS,NME6,NUDT5,GPD1L,PGLS,AK5,OLA1,PRKAG2,RFK,PPCS,PARP9,ABHD14B,NMNAT3	26/478
1_Member	GO Biological Processes	GO:0019693	ribose phosphate metabolic process	-6.03469	-3.30938	205,318,471,790,1723,2618,2987,3614,5151,5471,6785,7372,10201,11164,26289,29789,51422,55312,79717,84836,256281	AK4,NUDT2,ATIC,CAD,DHODH,GART,GUK1,IMPDH1,PDE8A,PPAT,ELOVL4,UMPS,NME6,NUDT5,AK5,OLA1,PRKAG2,RFK,PPCS,ABHD14B,NUDT14	21/369
1_Member	GO Biological Processes	GO:0009260	ribonucleotide biosynthetic process	-5.7157	-3.06217	205,318,471,790,1723,2618,3614,5471,6785,7372,10201,26289,51422,55312,79717	AK4,NUDT2,ATIC,CAD,DHODH,GART,IMPDH1,PPAT,ELOVL4,UMPS,NME6,AK5,PRKAG2,RFK,PPCS	15/208
1_Member	GO Biological Processes	GO:0009259	ribonucleotide metabolic process	-5.61693	-3.00874	205,318,471,790,1723,2618,2987,3614,5151,5471,6785,7372,10201,11164,26289,29789,51422,55312,79717,84836	AK4,NUDT2,ATIC,CAD,DHODH,GART,GUK1,IMPDH1,PDE8A,PPAT,ELOVL4,UMPS,NME6,NUDT5,AK5,OLA1,PRKAG2,RFK,PPCS,ABHD14B	20/360
1_Member	GO Biological Processes	GO:0046390	ribose phosphate biosynthetic process	-5.53773	-2.94505	205,318,471,790,1723,2618,3614,5471,6785,7372,10201,26289,51422,55312,79717	AK4,NUDT2,ATIC,CAD,DHODH,GART,IMPDH1,PPAT,ELOVL4,UMPS,NME6,AK5,PRKAG2,RFK,PPCS	15/215
1_Member	GO Biological Processes	GO:0072521	purine-containing compound metabolic process	-5.2172	-2.7199	205,318,471,2618,2987,3614,5151,5471,6120,6470,6785,10201,11164,23171,25796,26289,29789,51422,79717,83666,84836,349565	AK4,NUDT2,ATIC,GART,GUK1,IMPDH1,PDE8A,PPAT,RPE,SHMT1,ELOVL4,NME6,NUDT5,GPD1L,PGLS,AK5,OLA1,PRKAG2,PPCS,PARP9,ABHD14B,NMNAT3	22/450
1_Member	GO Biological Processes	GO:0006163	purine nucleotide metabolic process	-5.15508	-2.66984	205,318,471,2618,2987,3614,5151,5471,6120,6785,10201,11164,23171,25796,26289,29789,51422,79717,83666,84836,349565	AK4,NUDT2,ATIC,GART,GUK1,IMPDH1,PDE8A,PPAT,RPE,ELOVL4,NME6,NUDT5,GPD1L,PGLS,AK5,OLA1,PRKAG2,PPCS,PARP9,ABHD14B,NMNAT3	21/420
1_Member	KEGG Pathway	hsa00230	Purine metabolism	-5.06375	-2.60168	205,318,471,2618,2987,3614,5151,5471,10201,11164,26289	AK4,NUDT2,ATIC,GART,GUK1,IMPDH1,PDE8A,PPAT,NME6,NUDT5,AK5	11/128
1_Member	GO Biological Processes	GO:0072522	purine-containing compound biosynthetic process	-5.00245	-2.55698	205,318,471,2618,2987,3614,5471,6470,6785,10201,26289,51422,79717,83666,349565	AK4,NUDT2,ATIC,GART,GUK1,IMPDH1,PPAT,SHMT1,ELOVL4,NME6,AK5,PRKAG2,PPCS,PARP9,NMNAT3	15/238
1_Member	GO Biological Processes	GO:0006164	purine nucleotide biosynthetic process	-4.56222	-2.21367	205,318,471,2618,2987,3614,5471,6785,10201,26289,51422,79717,83666,349565	AK4,NUDT2,ATIC,GART,GUK1,IMPDH1,PPAT,ELOVL4,NME6,AK5,PRKAG2,PPCS,PARP9,NMNAT3	14/229
1_Member	GO Biological Processes	GO:0009150	purine ribonucleotide metabolic process	-3.75254	-1.65196	205,318,471,2618,2987,3614,5151,5471,6785,10201,11164,26289,29789,51422,79717,84836	AK4,NUDT2,ATIC,GART,GUK1,IMPDH1,PDE8A,PPAT,ELOVL4,NME6,NUDT5,AK5,OLA1,PRKAG2,PPCS,ABHD14B	16/341
1_Member	GO Biological Processes	GO:0009152	purine ribonucleotide biosynthetic process	-3.42772	-1.41762	205,318,471,2618,3614,5471,6785,10201,26289,51422,79717	AK4,NUDT2,ATIC,GART,IMPDH1,PPAT,ELOVL4,NME6,AK5,PRKAG2,PPCS	11/194
1_Member	GO Biological Processes	GO:0009199	ribonucleoside triphosphate metabolic process	-3.07672	-1.15653	205,318,790,3614,10201,11164,26289,29789,51422	AK4,NUDT2,CAD,IMPDH1,NME6,NUDT5,AK5,OLA1,PRKAG2	9/150
1_Member	GO Biological Processes	GO:0009141	nucleoside triphosphate metabolic process	-2.75108	-0.935278	205,318,790,3614,10201,11164,26289,29789,51422	AK4,NUDT2,CAD,IMPDH1,NME6,NUDT5,AK5,OLA1,PRKAG2	9/167
1_Member	GO Biological Processes	GO:0009205	purine ribonucleoside triphosphate metabolic process	-2.6029	-0.845409	205,318,3614,10201,11164,26289,29789,51422	AK4,NUDT2,IMPDH1,NME6,NUDT5,AK5,OLA1,PRKAG2	8/143
1_Member	GO Biological Processes	GO:0009142	nucleoside triphosphate biosynthetic process	-2.5641	-0.814926	205,318,790,3614,10201,26289,51422	AK4,NUDT2,CAD,IMPDH1,NME6,AK5,PRKAG2	7/114
1_Member	GO Biological Processes	GO:0009144	purine nucleoside triphosphate metabolic process	-2.51097	-0.785661	205,318,3614,10201,11164,26289,29789,51422	AK4,NUDT2,IMPDH1,NME6,NUDT5,AK5,OLA1,PRKAG2	8/148
1_Member	GO Biological Processes	GO:0046039	GTP metabolic process	-2.11767	-0.533762	205,3614,10201	AK4,IMPDH1,NME6	3/25
2_Summary	GO Biological Processes	GO:0006399	tRNA metabolic process	-10.1119	-6.23757	7453,8518,10557,11102,27037,51637,54888,54974,55140,55226,55250,63892,64172,79691,80324,81890,92675,112970,123283,134637,104,27079,51106,55783,83640,9326,54853,57510,79863,84524,1478	WARS1,ELP1,RPP38,RPP14,TRMT2A,RTRAF,NSUN2,THG1L,ELP3,NAT10,ELP2,THADA,OSGEPL1,QTRT2,PUS1,QTRT1,DTD1,KTI12,TARS3,ADAT2,ADARB1,RPUSD2,TFB1M,CMTR2,RAMAC,ZNHIT3,WDR55,XPO5,RBFA,ZC3H8,CSTF2	31/-
2_Member	GO Biological Processes	GO:0006399	tRNA metabolic process	-10.1119	-6.23757	7453,8518,10557,11102,27037,51637,54888,54974,55140,55226,55250,63892,64172,79691,80324,81890,92675,112970,123283,134637	WARS1,ELP1,RPP38,RPP14,TRMT2A,RTRAF,NSUN2,THG1L,ELP3,NAT10,ELP2,THADA,OSGEPL1,QTRT2,PUS1,QTRT1,DTD1,KTI12,TARS3,ADAT2	20/194
2_Member	GO Biological Processes	GO:0008033	tRNA processing	-10.109	-6.23757	8518,10557,11102,27037,51637,54888,54974,55140,55226,55250,63892,64172,79691,80324,81890,112970,134637	ELP1,RPP38,RPP14,TRMT2A,RTRAF,NSUN2,THG1L,ELP3,NAT10,ELP2,THADA,OSGEPL1,QTRT2,PUS1,QTRT1,KTI12,ADAT2	17/134
2_Member	GO Biological Processes	GO:0009451	RNA modification	-9.85641	-6.10992	104,8518,27037,27079,51106,54888,54974,55140,55226,55250,55783,63892,64172,79691,80324,81890,83640,112970,134637	ADARB1,ELP1,TRMT2A,RPUSD2,TFB1M,NSUN2,THG1L,ELP3,NAT10,ELP2,CMTR2,THADA,OSGEPL1,QTRT2,PUS1,QTRT1,RAMAC,KTI12,ADAT2	19/179
2_Member	GO Biological Processes	GO:0006400	tRNA modification	-9.37289	-5.80249	8518,27037,54888,54974,55140,55226,55250,63892,64172,79691,80324,81890,112970,134637	ELP1,TRMT2A,NSUN2,THG1L,ELP3,NAT10,ELP2,THADA,OSGEPL1,QTRT2,PUS1,QTRT1,KTI12,ADAT2	14/94
2_Member	GO Biological Processes	GO:0034660	ncRNA metabolic process	-6.7806	-3.89444	7453,8518,9326,10557,11102,27037,27079,51106,51637,54853,54888,54974,55140,55226,55250,57510,63892,64172,79691,79863,80324,81890,84524,92675,112970,123283,134637	WARS1,ELP1,ZNHIT3,RPP38,RPP14,TRMT2A,RPUSD2,TFB1M,RTRAF,WDR55,NSUN2,THG1L,ELP3,NAT10,ELP2,XPO5,THADA,OSGEPL1,QTRT2,RBFA,PUS1,QTRT1,ZC3H8,DTD1,KTI12,TARS3,ADAT2	27/520
2_Member	Reactome Gene Sets	R-HSA-72306	tRNA processing	-5.8255	-3.1204	1478,10557,11102,51637,54888,54974,63892,79691,80324,81890,134637	CSTF2,RPP38,RPP14,RTRAF,NSUN2,THG1L,THADA,QTRT2,PUS1,QTRT1,ADAT2	11/107
2_Member	GO Biological Processes	GO:0034470	ncRNA processing	-5.74802	-3.08037	8518,9326,10557,11102,27037,27079,51106,51637,54853,54888,54974,55140,55226,55250,63892,64172,79691,79863,80324,81890,112970,134637	ELP1,ZNHIT3,RPP38,RPP14,TRMT2A,RPUSD2,TFB1M,RTRAF,WDR55,NSUN2,THG1L,ELP3,NAT10,ELP2,THADA,OSGEPL1,QTRT2,RBFA,PUS1,QTRT1,KTI12,ADAT2	22/417
2_Member	Reactome Gene Sets	R-HSA-6782315	tRNA modification in the nucleus and cytosol	-5.23955	-2.73609	54888,54974,63892,79691,80324,81890,134637	NSUN2,THG1L,THADA,QTRT2,PUS1,QTRT1,ADAT2	7/43
3_Summary	GO Biological Processes	GO:0009123	nucleoside monophosphate metabolic process	-9.52062	-5.87103	205,318,471,790,1723,2618,2987,3614,5471,6470,7372,26289,55312,2356,2643,4548,4552,8836,1428,2593,5625,10404,154141,254531,1788,27430,11164,4144,7172,2731,84706	AK4,NUDT2,ATIC,CAD,DHODH,GART,GUK1,IMPDH1,PPAT,SHMT1,UMPS,AK5,RFK,FPGS,GCH1,MTR,MTRR,GGH,CRYM,GAMT,PRODH,CPQ,MBOAT1,LPCAT4,DNMT3A,MAT2B,NUDT5,MAT2A,TPMT,GLDC,GPT2	31/-
3_Member	GO Biological Processes	GO:0009123	nucleoside monophosphate metabolic process	-9.52062	-5.87103	205,318,471,790,1723,2618,2987,3614,5471,6470,7372,26289,55312	AK4,NUDT2,ATIC,CAD,DHODH,GART,GUK1,IMPDH1,PPAT,SHMT1,UMPS,AK5,RFK	13/76
3_Member	Reactome Gene Sets	R-HSA-8956320	Nucleotide biosynthesis	-9.0342	-5.58873	471,790,1723,2618,3614,5471,7372	ATIC,CAD,DHODH,GART,IMPDH1,PPAT,UMPS	7/14
3_Member	GO Biological Processes	GO:0009124	nucleoside monophosphate biosynthetic process	-8.94398	-5.54967	318,471,790,1723,2618,3614,5471,6470,7372,55312	NUDT2,ATIC,CAD,DHODH,GART,IMPDH1,PPAT,SHMT1,UMPS,RFK	10/42
3_Member	GO Biological Processes	GO:0009161	ribonucleoside monophosphate metabolic process	-8.56397	-5.28205	205,318,471,790,1723,2618,2987,3614,5471,7372,55312	AK4,NUDT2,ATIC,CAD,DHODH,GART,GUK1,IMPDH1,PPAT,UMPS,RFK	11/59
3_Member	GO Biological Processes	GO:0009156	ribonucleoside monophosphate biosynthetic process	-8.55143	-5.28205	318,471,790,1723,2618,3614,5471,7372,55312	NUDT2,ATIC,CAD,DHODH,GART,IMPDH1,PPAT,UMPS,RFK	9/34
3_Member	GO Biological Processes	GO:0006760	folic acid-containing compound metabolic process	-8.23823	-5.0358	471,2356,2618,2643,4548,4552,6470,8836	ATIC,FPGS,GART,GCH1,MTR,MTRR,SHMT1,GGH	8/26
3_Member	GO Biological Processes	GO:0006575	cellular modified amino acid metabolic process	-8.10009	-4.92762	471,1428,2356,2593,2618,2643,4548,4552,5625,6470,8836,10404,154141,254531	ATIC,CRYM,FPGS,GAMT,GART,GCH1,MTR,MTRR,PRODH,SHMT1,GGH,CPQ,MBOAT1,LPCAT4	14/117
3_Member	GO Biological Processes	GO:0042558	pteridine-containing compound metabolic process	-7.44742	-4.39989	471,2356,2618,2643,4548,4552,6470,8836	ATIC,FPGS,GART,GCH1,MTR,MTRR,SHMT1,GGH	8/32
3_Member	GO Biological Processes	GO:0046112	nucleobase biosynthetic process	-6.53831	-3.6949	790,1723,2618,5471,6470,7372	CAD,DHODH,GART,PPAT,SHMT1,UMPS	6/18
3_Member	WikiPathways	WP241	One-carbon metabolism	-6.4686	-3.63856	471,1788,2618,4548,4552,6470,27430	ATIC,DNMT3A,GART,MTR,MTRR,SHMT1,MAT2B	7/29
3_Member	Reactome Gene Sets	R-HSA-15869	Metabolism of nucleotides	-6.16525	-3.39647	205,471,790,1723,2618,2987,3614,5471,7372,11164,26289	AK4,ATIC,CAD,DHODH,GART,GUK1,IMPDH1,PPAT,UMPS,NUDT5,AK5	11/99
3_Member	WikiPathways	WP4224	Purine metabolism and related disorders	-5.95828	-3.24319	471,2618,3614,4144,5471,7172	ATIC,GART,IMPDH1,MAT2A,PPAT,TPMT	6/22
3_Member	GO Biological Processes	GO:0046653	tetrahydrofolate metabolic process	-5.36765	-2.82096	471,2618,2643,4548,6470	ATIC,GART,GCH1,MTR,SHMT1	5/16
3_Member	GO Biological Processes	GO:0009396	folic acid-containing compound biosynthetic process	-5.3304	-2.80792	471,2356,2618,2643	ATIC,FPGS,GART,GCH1	4/8
3_Member	GO Biological Processes	GO:0009167	purine ribonucleoside monophosphate metabolic process	-5.3106	-2.80089	205,318,471,2618,2987,3614,5471	AK4,NUDT2,ATIC,GART,GUK1,IMPDH1,PPAT	7/42
3_Member	GO Biological Processes	GO:0009126	purine nucleoside monophosphate metabolic process	-5.17042	-2.67919	205,318,471,2618,2987,3614,5471	AK4,NUDT2,ATIC,GART,GUK1,IMPDH1,PPAT	7/44
3_Member	GO Biological Processes	GO:0009168	purine ribonucleoside monophosphate biosynthetic process	-4.84095	-2.42689	318,471,2618,3614,5471	NUDT2,ATIC,GART,IMPDH1,PPAT	5/20
3_Member	GO Biological Processes	GO:0009112	nucleobase metabolic process	-4.77457	-2.37228	790,1723,2618,5471,6470,7372	CAD,DHODH,GART,PPAT,SHMT1,UMPS	6/34
3_Member	Reactome Gene Sets	R-HSA-73817	Purine ribonucleoside monophosphate biosynthesis	-4.67394	-2.30311	471,2618,3614,5471	ATIC,GART,IMPDH1,PPAT	4/11
3_Member	GO Biological Processes	GO:0009127	purine nucleoside monophosphate biosynthetic process	-4.62259	-2.2633	318,471,2618,3614,5471	NUDT2,ATIC,GART,IMPDH1,PPAT	5/22
3_Member	GO Biological Processes	GO:0042559	pteridine-containing compound biosynthetic process	-4.34944	-2.05396	471,2356,2618,2643	ATIC,FPGS,GART,GCH1	4/13
3_Member	GO Biological Processes	GO:0046033	AMP metabolic process	-4.33533	-2.04747	205,318,471,2618,5471	AK4,NUDT2,ATIC,GART,PPAT	5/25
3_Member	GO Biological Processes	GO:0006167	AMP biosynthetic process	-4.20895	-1.95821	318,471,2618,5471	NUDT2,ATIC,GART,PPAT	4/14
3_Member	GO Biological Processes	GO:0006177	GMP biosynthetic process	-4.20895	-1.95821	471,2618,3614,5471	ATIC,GART,IMPDH1,PPAT	4/14
3_Member	GO Biological Processes	GO:0042398	cellular modified amino acid biosynthetic process	-4.16533	-1.93071	471,2356,2593,2618,2643	ATIC,FPGS,GAMT,GART,GCH1	5/27
3_Member	GO Biological Processes	GO:0046037	GMP metabolic process	-4.16533	-1.93071	471,2618,2987,3614,5471	ATIC,GART,GUK1,IMPDH1,PPAT	5/27
3_Member	GO Biological Processes	GO:0006189	'de novo' IMP biosynthetic process	-4.07826	-1.90579	471,2618,5471	ATIC,GART,PPAT	3/6
3_Member	GO Biological Processes	GO:0046654	tetrahydrofolate biosynthetic process	-4.07826	-1.90579	471,2618,2643	ATIC,GART,GCH1	3/6
3_Member	KEGG Pathway	hsa01523	Antifolate resistance	-3.93605	-1.78615	471,2356,2618,6470,8836	ATIC,FPGS,GART,SHMT1,GGH	5/30
3_Member	GO Biological Processes	GO:0097292	XMP metabolic process	-3.84053	-1.73001	471,2618,5471	ATIC,GART,PPAT	3/7
3_Member	GO Biological Processes	GO:0097293	XMP biosynthetic process	-3.84053	-1.73001	471,2618,5471	ATIC,GART,PPAT	3/7
3_Member	GO Biological Processes	GO:0097294	'de novo' XMP biosynthetic process	-3.84053	-1.73001	471,2618,5471	ATIC,GART,PPAT	3/7
3_Member	WikiPathways	WP4259	Disorders of folate metabolism and transport	-3.64915	-1.57645	471,2618,4548,6470	ATIC,GART,MTR,SHMT1	4/19
3_Member	GO Biological Processes	GO:0044208	'de novo' AMP biosynthetic process	-3.64171	-1.57645	471,2618,5471	ATIC,GART,PPAT	3/8
3_Member	KEGG Pathway	hsa00670	One carbon pool by folate	-3.55786	-1.51081	471,2618,4548,6470	ATIC,GART,MTR,SHMT1	4/20
3_Member	GO Biological Processes	GO:0009113	purine nucleobase biosynthetic process	-3.32131	-1.33069	2618,5471,6470	GART,PPAT,SHMT1	3/10
3_Member	GO Biological Processes	GO:0006188	IMP biosynthetic process	-3.1883	-1.24519	471,2618,5471	ATIC,GART,PPAT	3/11
3_Member	GO Biological Processes	GO:0046655	folic acid metabolic process	-2.76889	-0.94218	2356,4552,6470	FPGS,MTRR,SHMT1	3/15
3_Member	GO Biological Processes	GO:0006544	glycine metabolic process	-2.60493	-0.846319	2618,2731,6470	GART,GLDC,SHMT1	3/17
3_Member	GO Biological Processes	GO:0046040	IMP metabolic process	-2.53101	-0.799449	471,2618,5471	ATIC,GART,PPAT	3/18
3_Member	GO Biological Processes	GO:0043648	dicarboxylic acid metabolic process	-2.41863	-0.723287	471,2356,4552,5625,6470,84706	ATIC,FPGS,MTRR,PRODH,SHMT1,GPT2	6/91
3_Member	GO Biological Processes	GO:0006144	purine nucleobase metabolic process	-2.3963	-0.717553	2618,5471,6470	GART,PPAT,SHMT1	3/20
4_Summary	GO Biological Processes	GO:0006520	amino acid metabolic process	-8.75346	-5.4049	95,586,790,1428,2184,2356,2618,2731,4548,4552,5184,5471,5625,5723,6470,7453,23464,29968,84706,84842,123283,138199,2584,5211,5214,6566,7263,8644,9942,11164,55862,2593,10166,196743	ACY1,BCAT1,CAD,CRYM,FAH,FPGS,GART,GLDC,MTR,MTRR,PEPD,PPAT,PRODH,PSPH,SHMT1,WARS1,GCAT,PSAT1,GPT2,HPDL,TARS3,CARNMT1,GALK1,PFKL,PFKP,SLC16A1,TST,AKR1C3,XYLB,NUDT5,ECHDC1,GAMT,SLC25A15,PAOX	34/-
4_Member	GO Biological Processes	GO:0006520	amino acid metabolic process	-8.75346	-5.4049	95,586,790,1428,2184,2356,2618,2731,4548,4552,5184,5471,5625,5723,6470,7453,23464,29968,84706,84842,123283,138199	ACY1,BCAT1,CAD,CRYM,FAH,FPGS,GART,GLDC,MTR,MTRR,PEPD,PPAT,PRODH,PSPH,SHMT1,WARS1,GCAT,PSAT1,GPT2,HPDL,TARS3,CARNMT1	22/281
4_Member	GO Biological Processes	GO:1901605	alpha-amino acid metabolic process	-6.72213	-3.86494	586,790,1428,2184,2356,2618,2731,4548,4552,5471,5625,5723,6470,23464,29968,84706	BCAT1,CAD,CRYM,FAH,FPGS,GART,GLDC,MTR,MTRR,PPAT,PRODH,PSPH,SHMT1,GCAT,PSAT1,GPT2	16/198
4_Member	GO Biological Processes	GO:0044282	small molecule catabolic process	-4.61611	-2.26318	1428,2184,2584,2731,4552,5211,5214,5625,6470,6566,7263,8644,9942,11164,23464,55862,84706,138199	CRYM,FAH,GALK1,GLDC,MTRR,PFKL,PFKP,PRODH,SHMT1,SLC16A1,TST,AKR1C3,XYLB,NUDT5,GCAT,ECHDC1,GPT2,CARNMT1	18/353
4_Member	GO Biological Processes	GO:0009063	amino acid catabolic process	-4.0499	-1.88031	1428,2184,2731,4552,5625,6470,23464,84706,138199	CRYM,FAH,GLDC,MTRR,PRODH,SHMT1,GCAT,GPT2,CARNMT1	9/111
4_Member	GO Biological Processes	GO:1901606	alpha-amino acid catabolic process	-3.9055	-1.76377	1428,2184,2731,4552,5625,6470,23464,84706	CRYM,FAH,GLDC,MTRR,PRODH,SHMT1,GCAT,GPT2	8/91
4_Member	GO Biological Processes	GO:0016054	organic acid catabolic process	-3.85919	-1.73335	1428,2184,2731,4552,5625,6470,6566,7263,9942,23464,55862,84706,138199	CRYM,FAH,GLDC,MTRR,PRODH,SHMT1,SLC16A1,TST,XYLB,GCAT,ECHDC1,GPT2,CARNMT1	13/234
4_Member	GO Biological Processes	GO:0046395	carboxylic acid catabolic process	-3.85919	-1.73335	1428,2184,2731,4552,5625,6470,6566,7263,9942,23464,55862,84706,138199	CRYM,FAH,GLDC,MTRR,PRODH,SHMT1,SLC16A1,TST,XYLB,GCAT,ECHDC1,GPT2,CARNMT1	13/234
4_Member	Reactome Gene Sets	R-HSA-71291	Metabolism of amino acids and derivatives	-3.75894	-1.65589	586,1428,2184,2593,2731,4548,4552,5625,5723,6470,7263,10166,23464,29968,84706,138199,196743	BCAT1,CRYM,FAH,GAMT,GLDC,MTR,MTRR,PRODH,PSPH,SHMT1,TST,SLC25A15,GCAT,PSAT1,GPT2,CARNMT1,PAOX	17/376
4_Member	GO Biological Processes	GO:0009066	aspartate family amino acid metabolic process	-2.14241	-0.546669	1428,4548,4552,23464	CRYM,MTR,MTRR,GCAT	4/47
5_Summary	KEGG Pathway	hsa01230	Biosynthesis of amino acids	-8.48831	-5.2537	95,586,4144,4548,5211,5214,5723,6120,6470,27430,29968,84706,2593,2731,23464,2618,5471,6510,790,4552,25796,6566,7428	ACY1,BCAT1,MAT2A,MTR,PFKL,PFKP,PSPH,RPE,SHMT1,MAT2B,PSAT1,GPT2,GAMT,GLDC,GCAT,GART,PPAT,SLC1A5,CAD,MTRR,PGLS,SLC16A1,VHL	23/-
5_Member	KEGG Pathway	hsa01230	Biosynthesis of amino acids	-8.48831	-5.2537	95,586,4144,4548,5211,5214,5723,6120,6470,27430,29968,84706	ACY1,BCAT1,MAT2A,MTR,PFKL,PFKP,PSPH,RPE,SHMT1,MAT2B,PSAT1,GPT2	12/75
5_Member	KEGG Pathway	hsa00260	Glycine, serine and threonine metabolism	-4.3551	-2.05576	2593,2731,5723,6470,23464,29968	GAMT,GLDC,PSPH,SHMT1,GCAT,PSAT1	6/40
5_Member	WikiPathways	WP4290	Metabolic reprogramming in colon cancer	-4.23142	-1.96723	2618,5211,5471,5723,6510,29968	GART,PFKL,PPAT,PSPH,SLC1A5,PSAT1	6/42
5_Member	GO Biological Processes	GO:1901607	alpha-amino acid biosynthetic process	-3.95482	-1.79939	586,790,4548,4552,5723,6470,29968	BCAT1,CAD,MTR,MTRR,PSPH,SHMT1,PSAT1	7/67
5_Member	KEGG Pathway	hsa01200	Carbon metabolism	-3.93126	-1.7841	2731,5211,5214,5723,6120,6470,25796,29968,84706	GLDC,PFKL,PFKP,PSPH,RPE,SHMT1,PGLS,PSAT1,GPT2	9/115
5_Member	WikiPathways	WP5213	Amino acid metabolism in triple-negative breast cancer cells	-3.84053	-1.73001	5723,6510,29968	PSPH,SLC1A5,PSAT1	3/7
5_Member	GO Biological Processes	GO:0008652	amino acid biosynthetic process	-3.64507	-1.57645	586,790,4548,4552,5723,6470,29968	BCAT1,CAD,MTR,MTRR,PSPH,SHMT1,PSAT1	7/75
5_Member	WikiPathways	WP4688	Serine metabolism	-3.64171	-1.57645	5723,6470,29968	PSPH,SHMT1,PSAT1	3/8
5_Member	GO Biological Processes	GO:0009069	serine family amino acid metabolic process	-3.38209	-1.37596	2618,2731,5723,6470,29968	GART,GLDC,PSPH,SHMT1,PSAT1	5/39
5_Member	GO Biological Processes	GO:0006563	L-serine metabolic process	-2.95999	-1.07681	5723,6470,29968	PSPH,SHMT1,PSAT1	3/13
5_Member	WikiPathways	WP5312	Metabolic pathways of fibroblasts	-2.75454	-0.937464	5723,6510,6566,29968	PSPH,SLC1A5,SLC16A1,PSAT1	4/32
5_Member	WikiPathways	WP4018	Clear cell renal cell carcinoma pathways	-2.54073	-0.801766	5211,5214,5723,6470,7428,29968	PFKL,PFKP,PSPH,SHMT1,VHL,PSAT1	6/86
5_Member	GO Biological Processes	GO:0009070	serine family amino acid biosynthetic process	-2.3346	-0.67357	5723,6470,29968	PSPH,SHMT1,PSAT1	3/21
6_Summary	GO Biological Processes	GO:0009133	nucleoside diphosphate biosynthetic process	-7.54229	-4.43878	205,790,1723,2987,7372,26289,11164,6470,10201,5438,10621,10622,139596,54790,80324,318	AK4,CAD,DHODH,GUK1,UMPS,AK5,NUDT5,SHMT1,NME6,POLR2I,POLR3F,POLR3G,UPRT,TET2,PUS1,NUDT2	16/-
6_Member	GO Biological Processes	GO:0009133	nucleoside diphosphate biosynthetic process	-7.54229	-4.43878	205,790,1723,2987,7372,26289	AK4,CAD,DHODH,GUK1,UMPS,AK5	6/13
6_Member	GO Biological Processes	GO:0009188	ribonucleoside diphosphate biosynthetic process	-6.86642	-3.96502	205,790,1723,7372,26289	AK4,CAD,DHODH,UMPS,AK5	5/9
6_Member	GO Biological Processes	GO:0009185	ribonucleoside diphosphate metabolic process	-6.35935	-3.56709	205,790,1723,2987,7372,11164,26289	AK4,CAD,DHODH,GUK1,UMPS,NUDT5,AK5	7/30
6_Member	GO Biological Processes	GO:0009132	nucleoside diphosphate metabolic process	-5.69835	-3.06217	205,790,1723,2987,7372,11164,26289	AK4,CAD,DHODH,GUK1,UMPS,NUDT5,AK5	7/37
6_Member	GO Biological Processes	GO:0044205	'de novo' UMP biosynthetic process	-5.36334	-2.82096	790,1723,7372	CAD,DHODH,UMPS	3/3
6_Member	Reactome Gene Sets	R-HSA-500753	Pyrimidine biosynthesis	-5.36334	-2.82096	790,1723,7372	CAD,DHODH,UMPS	3/3
6_Member	GO Biological Processes	GO:0006221	pyrimidine nucleotide biosynthetic process	-4.93403	-2.50455	790,1723,6470,7372,10201,26289	CAD,DHODH,SHMT1,UMPS,NME6,AK5	6/32
6_Member	GO Biological Processes	GO:0006225	UDP biosynthetic process	-4.7666	-2.37228	790,1723,7372	CAD,DHODH,UMPS	3/4
6_Member	GO Biological Processes	GO:0009194	pyrimidine ribonucleoside diphosphate biosynthetic process	-4.7666	-2.37228	790,1723,7372	CAD,DHODH,UMPS	3/4
6_Member	GO Biological Processes	GO:0009220	pyrimidine ribonucleotide biosynthetic process	-4.52199	-2.18203	790,1723,7372,10201,26289	CAD,DHODH,UMPS,NME6,AK5	5/23
6_Member	GO Biological Processes	GO:0072528	pyrimidine-containing compound biosynthetic process	-4.48624	-2.15888	790,1723,6470,7372,10201,26289	CAD,DHODH,SHMT1,UMPS,NME6,AK5	6/38
6_Member	WikiPathways	WP4022	Pyrimidine metabolism	-4.15226	-1.92097	790,1723,5438,7372,10201,10621,10622,139596	CAD,DHODH,POLR2I,UMPS,NME6,POLR3F,POLR3G,UPRT	8/84
6_Member	GO Biological Processes	GO:0009130	pyrimidine nucleoside monophosphate biosynthetic process	-4.07989	-1.90579	790,1723,6470,7372	CAD,DHODH,SHMT1,UMPS	4/15
6_Member	GO Biological Processes	GO:0006207	'de novo' pyrimidine nucleobase biosynthetic process	-4.07826	-1.90579	790,1723,7372	CAD,DHODH,UMPS	3/6
6_Member	GO Biological Processes	GO:0009139	pyrimidine nucleoside diphosphate biosynthetic process	-4.07826	-1.90579	790,1723,7372	CAD,DHODH,UMPS	3/6
6_Member	GO Biological Processes	GO:0009218	pyrimidine ribonucleotide metabolic process	-3.8655	-1.73443	790,1723,7372,10201,26289	CAD,DHODH,UMPS,NME6,AK5	5/31
6_Member	GO Biological Processes	GO:0009193	pyrimidine ribonucleoside diphosphate metabolic process	-3.84053	-1.73001	790,1723,7372	CAD,DHODH,UMPS	3/7
6_Member	GO Biological Processes	GO:0046048	UDP metabolic process	-3.84053	-1.73001	790,1723,7372	CAD,DHODH,UMPS	3/7
6_Member	GO Biological Processes	GO:0006220	pyrimidine nucleotide metabolic process	-3.65609	-1.57645	790,1723,6470,7372,10201,26289	CAD,DHODH,SHMT1,UMPS,NME6,AK5	6/53
6_Member	GO Biological Processes	GO:0019856	pyrimidine nucleobase biosynthetic process	-3.64171	-1.57645	790,1723,7372	CAD,DHODH,UMPS	3/8
6_Member	GO Biological Processes	GO:0009129	pyrimidine nucleoside monophosphate metabolic process	-3.47171	-1.45074	790,1723,6470,7372	CAD,DHODH,SHMT1,UMPS	4/21
6_Member	GO Biological Processes	GO:0009138	pyrimidine nucleoside diphosphate metabolic process	-3.47092	-1.45074	790,1723,7372	CAD,DHODH,UMPS	3/9
6_Member	GO Biological Processes	GO:0072527	pyrimidine-containing compound metabolic process	-3.37308	-1.36891	790,1723,6470,7372,10201,26289,54790	CAD,DHODH,SHMT1,UMPS,NME6,AK5,TET2	7/83
6_Member	GO Biological Processes	GO:0006222	UMP biosynthetic process	-3.32131	-1.33069	790,1723,7372	CAD,DHODH,UMPS	3/10
6_Member	GO Biological Processes	GO:0009174	pyrimidine ribonucleoside monophosphate biosynthetic process	-3.1883	-1.24519	790,1723,7372	CAD,DHODH,UMPS	3/11
6_Member	GO Biological Processes	GO:0046049	UMP metabolic process	-2.86053	-1.00473	790,1723,7372	CAD,DHODH,UMPS	3/14
6_Member	GO Biological Processes	GO:0006206	pyrimidine nucleobase metabolic process	-2.76889	-0.94218	790,1723,7372	CAD,DHODH,UMPS	3/15
6_Member	GO Biological Processes	GO:0009173	pyrimidine ribonucleoside monophosphate metabolic process	-2.76889	-0.94218	790,1723,7372	CAD,DHODH,UMPS	3/15
6_Member	WikiPathways	WP4584	Biomarkers for pyrimidine metabolism disorders	-2.76889	-0.94218	1723,7372,80324	DHODH,UMPS,PUS1	3/15
6_Member	KEGG Pathway	hsa00240	Pyrimidine metabolism	-2.59134	-0.838282	318,790,1723,7372,10201	NUDT2,CAD,DHODH,UMPS,NME6	5/58
6_Member	WikiPathways	WP4225	Pyrimidine metabolism and related diseases	-2.3963	-0.717553	790,1723,7372	CAD,DHODH,UMPS	3/20
7_Summary	GO Biological Processes	GO:0032259	methylation	-7.53207	-4.43878	1788,2593,4548,4552,4801,7172,10322,27037,28989,51106,51451,51603,54888,55783,63892,79918,83640,84661,138199,221143,399818	DNMT3A,GAMT,MTR,MTRR,NFYB,TPMT,SMYD5,TRMT2A,NTMT1,TFB1M,LCMT1,METTL13,NSUN2,CMTR2,THADA,SETD6,RAMAC,DPY30,CARNMT1,EEF1AKMT1,EEF1AKMT2	21/-
7_Member	GO Biological Processes	GO:0032259	methylation	-7.53207	-4.43878	1788,2593,4548,4552,4801,7172,10322,27037,28989,51106,51451,51603,54888,55783,63892,79918,83640,84661,138199,221143,399818	DNMT3A,GAMT,MTR,MTRR,NFYB,TPMT,SMYD5,TRMT2A,NTMT1,TFB1M,LCMT1,METTL13,NSUN2,CMTR2,THADA,SETD6,RAMAC,DPY30,CARNMT1,EEF1AKMT1,EEF1AKMT2	21/300
7_Member	GO Biological Processes	GO:0043414	macromolecule methylation	-5.44783	-2.87012	1788,4552,4801,10322,27037,28989,51106,51451,54888,55783,63892,79918,83640,84661,221143,399818	DNMT3A,MTRR,NFYB,SMYD5,TRMT2A,NTMT1,TFB1M,LCMT1,NSUN2,CMTR2,THADA,SETD6,RAMAC,DPY30,EEF1AKMT1,EEF1AKMT2	16/247
7_Member	GO Biological Processes	GO:0006479	protein methylation	-3.26106	-1.29452	4801,10322,28989,51451,79918,84661,221143,399818	NFYB,SMYD5,NTMT1,LCMT1,SETD6,DPY30,EEF1AKMT1,EEF1AKMT2	8/113
7_Member	GO Biological Processes	GO:0008213	protein alkylation	-3.26106	-1.29452	4801,10322,28989,51451,79918,84661,221143,399818	NFYB,SMYD5,NTMT1,LCMT1,SETD6,DPY30,EEF1AKMT1,EEF1AKMT2	8/113
7_Member	GO Biological Processes	GO:0018022	peptidyl-lysine methylation	-3.00057	-1.10533	4801,10322,79918,84661,221143,399818	NFYB,SMYD5,SETD6,DPY30,EEF1AKMT1,EEF1AKMT2	6/70
8_Summary	GO Biological Processes	GO:0010942	positive regulation of cell death	-7.50417	-4.43436	409,580,958,997,1612,1676,1788,3965,4609,5481,5519,5599,5625,6789,6850,7052,8644,8682,8717,8915,9833,10533,10616,11200,27250,54507,55164,56616,57118,84524,641700	ARRB2,BARD1,CD40,CDC34,DAPK1,DFFA,DNMT3A,LGALS9,MYC,PPID,PPP2R1B,MAPK8,PRODH,STK4,SYK,TGM2,AKR1C3,PEA15,TRADD,BCL10,MELK,ATG7,RBCK1,CHEK2,PDCD4,ADAMTSL4,SHQ1,DIABLO,CAMK1D,ZC3H8,ECSCR	31/-
8_Member	GO Biological Processes	GO:0010942	positive regulation of cell death	-7.50417	-4.43436	409,580,958,997,1612,1676,1788,3965,4609,5481,5519,5599,5625,6789,6850,7052,8644,8682,8717,8915,9833,10533,10616,11200,27250,54507,55164,56616,57118,84524,641700	ARRB2,BARD1,CD40,CDC34,DAPK1,DFFA,DNMT3A,LGALS9,MYC,PPID,PPP2R1B,MAPK8,PRODH,STK4,SYK,TGM2,AKR1C3,PEA15,TRADD,BCL10,MELK,ATG7,RBCK1,CHEK2,PDCD4,ADAMTSL4,SHQ1,DIABLO,CAMK1D,ZC3H8,ECSCR	31/609
8_Member	GO Biological Processes	GO:0043068	positive regulation of programmed cell death	-7.19875	-4.21192	409,580,958,997,1612,1676,3965,4609,5481,5519,5599,6789,6850,7052,8644,8682,8717,8915,9833,10533,10616,11200,27250,54507,55164,56616,57118,84524,641700	ARRB2,BARD1,CD40,CDC34,DAPK1,DFFA,LGALS9,MYC,PPID,PPP2R1B,MAPK8,STK4,SYK,TGM2,AKR1C3,PEA15,TRADD,BCL10,MELK,ATG7,RBCK1,CHEK2,PDCD4,ADAMTSL4,SHQ1,DIABLO,CAMK1D,ZC3H8,ECSCR	29/561
8_Member	GO Biological Processes	GO:0043065	positive regulation of apoptotic process	-7.0144	-4.08081	409,580,958,997,1612,1676,3965,4609,5481,5519,5599,6789,7052,8644,8682,8717,8915,9833,10533,10616,11200,27250,54507,55164,56616,57118,84524,641700	ARRB2,BARD1,CD40,CDC34,DAPK1,DFFA,LGALS9,MYC,PPID,PPP2R1B,MAPK8,STK4,TGM2,AKR1C3,PEA15,TRADD,BCL10,MELK,ATG7,RBCK1,CHEK2,PDCD4,ADAMTSL4,SHQ1,DIABLO,CAMK1D,ZC3H8,ECSCR	28/539
9_Summary	GO Biological Processes	GO:0044283	small molecule biosynthetic process	-6.76163	-3.8902	231,586,790,1382,2593,2643,4023,4282,4548,4552,5336,5723,6470,6785,6850,8644,9885,23590,29968,51422,55163,55312,55825,57017,65985,2184,2584,5211,5214,6566,9942,29785,55862	AKR1B1,BCAT1,CAD,CRABP2,GAMT,GCH1,LPL,MIF,MTR,MTRR,PLCG2,PSPH,SHMT1,ELOVL4,SYK,AKR1C3,OSBPL2,PDSS1,PSAT1,PRKAG2,PNPO,RFK,PECR,COQ9,AACS,FAH,GALK1,PFKL,PFKP,SLC16A1,XYLB,CYP2S1,ECHDC1	33/-
9_Member	GO Biological Processes	GO:0044283	small molecule biosynthetic process	-6.76163	-3.8902	231,586,790,1382,2593,2643,4023,4282,4548,4552,5336,5723,6470,6785,6850,8644,9885,23590,29968,51422,55163,55312,55825,57017,65985	AKR1B1,BCAT1,CAD,CRABP2,GAMT,GCH1,LPL,MIF,MTR,MTRR,PLCG2,PSPH,SHMT1,ELOVL4,SYK,AKR1C3,OSBPL2,PDSS1,PSAT1,PRKAG2,PNPO,RFK,PECR,COQ9,AACS	25/456
9_Member	GO Biological Processes	GO:0046394	carboxylic acid biosynthetic process	-6.14063	-3.38314	231,586,790,1382,2593,4023,4282,4548,4552,5723,6470,6785,6850,8644,9885,29968,51422,55825	AKR1B1,BCAT1,CAD,CRABP2,GAMT,LPL,MIF,MTR,MTRR,PSPH,SHMT1,ELOVL4,SYK,AKR1C3,OSBPL2,PSAT1,PRKAG2,PECR	18/274
9_Member	GO Biological Processes	GO:0016053	organic acid biosynthetic process	-6.07224	-3.32792	231,586,790,1382,2593,4023,4282,4548,4552,5723,6470,6785,6850,8644,9885,29968,51422,55825	AKR1B1,BCAT1,CAD,CRABP2,GAMT,LPL,MIF,MTR,MTRR,PSPH,SHMT1,ELOVL4,SYK,AKR1C3,OSBPL2,PSAT1,PRKAG2,PECR	18/277
9_Member	GO Biological Processes	GO:0032787	monocarboxylic acid metabolic process	-3.06314	-1.15391	231,1382,2184,2584,2593,4023,4282,5211,5214,6566,6785,8644,9885,9942,29785,51422,55825,55862,65985	AKR1B1,CRABP2,FAH,GALK1,GAMT,LPL,MIF,PFKL,PFKP,SLC16A1,ELOVL4,AKR1C3,OSBPL2,XYLB,CYP2S1,PRKAG2,PECR,ECHDC1,AACS	19/512
9_Member	GO Biological Processes	GO:0072330	monocarboxylic acid biosynthetic process	-2.76897	-0.94218	1382,2593,4023,4282,6785,8644,9885,51422,55825	CRABP2,GAMT,LPL,MIF,ELOVL4,AKR1C3,OSBPL2,PRKAG2,PECR	9/166
10_Summary	GO Biological Processes	GO:0010948	negative regulation of cell cycle process	-6.45276	-3.63568	580,641,6657,7013,7508,8260,9314,10040,10201,11200,51347,51603,54888,56241,57099,57646,83666,261726,440275,231,362,958,3297,4609,5481,5599,6121,6326,8915,27347,50848,83959,997,1676,1788,2968,4552,4796,5001,5438,5442,8815,9557,10535,11232,25898,54790,55388,56652,64782,84515,85015,92675,200558,257218,5336,11319,51451,134353,55226,57132,3661,4282,84259,1978,2289,6654,5451,1164,1845,150465	BARD1,BLM,SOX2,TERF1,XPC,NAA10,KLF4,TOM1L1,NME6,CHEK2,TAOK3,METTL13,NSUN2,SUSD2,AVEN,USP28,PARP9,TIPRL,EIF2AK4,AKR1B1,AQP5,CD40,HSF1,MYC,PPID,MAPK8,RPE65,SCN2A,BCL10,STK39,F11R,SLC4A11,CDC34,DFFA,DNMT3A,GTF2H4,MTRR,TONSL,ORC5,POLR2I,POLRMT,BANF1,CHD1L,RNASEH2A,POLG2,RCHY1,TET2,MCM10,TWNK,AEN,MCM8,USP45,DTD1,APLF,SHPRH,PLCG2,ECD,LCMT1,LSM11,NAT10,CHMP1B,IRF3,MIF,DCUN1D5,EIF4EBP1,FKBP5,SOS1,POU2F1,…	71/-
10_Member	GO Biological Processes	GO:0010948	negative regulation of cell cycle process	-6.45276	-3.63568	580,641,6657,7013,7508,8260,9314,10040,10201,11200,51347,51603,54888,56241,57099,57646,83666,261726,440275	BARD1,BLM,SOX2,TERF1,XPC,NAA10,KLF4,TOM1L1,NME6,CHEK2,TAOK3,METTL13,NSUN2,SUSD2,AVEN,USP28,PARP9,TIPRL,EIF2AK4	19/289
10_Member	GO Biological Processes	GO:0071214	cellular response to abiotic stimulus	-5.74769	-3.08037	231,362,580,641,958,3297,4609,5481,5599,6121,6326,7508,8915,11200,27347,50848,57646,83959,440275	AKR1B1,AQP5,BARD1,BLM,CD40,HSF1,MYC,PPID,MAPK8,RPE65,SCN2A,XPC,BCL10,CHEK2,STK39,F11R,USP28,SLC4A11,EIF2AK4	19/322
10_Member	GO Biological Processes	GO:0104004	cellular response to environmental stimulus	-5.74769	-3.08037	231,362,580,641,958,3297,4609,5481,5599,6121,6326,7508,8915,11200,27347,50848,57646,83959,440275	AKR1B1,AQP5,BARD1,BLM,CD40,HSF1,MYC,PPID,MAPK8,RPE65,SCN2A,XPC,BCL10,CHEK2,STK39,F11R,USP28,SLC4A11,EIF2AK4	19/322
10_Member	GO Biological Processes	GO:0006259	DNA metabolic process	-5.65186	-3.02758	580,641,997,1676,1788,2968,3297,4552,4796,5001,5438,5442,7013,7508,8815,9557,10535,11200,11232,25898,51347,54790,55388,56652,57646,64782,83666,84515,85015,92675,200558,257218	BARD1,BLM,CDC34,DFFA,DNMT3A,GTF2H4,HSF1,MTRR,TONSL,ORC5,POLR2I,POLRMT,TERF1,XPC,BANF1,CHD1L,RNASEH2A,CHEK2,POLG2,RCHY1,TAOK3,TET2,MCM10,TWNK,USP28,AEN,PARP9,MCM8,USP45,DTD1,APLF,SHPRH	32/780
10_Member	GO Biological Processes	GO:1901988	negative regulation of cell cycle phase transition	-4.8951	-2.47596	580,641,6657,7508,9314,11200,51347,51603,54888,56241,57099,57646,83666,261726,440275	BARD1,BLM,SOX2,XPC,KLF4,CHEK2,TAOK3,METTL13,NSUN2,SUSD2,AVEN,USP28,PARP9,TIPRL,EIF2AK4	15/243
10_Member	GO Biological Processes	GO:0045786	negative regulation of cell cycle	-4.75284	-2.36333	580,641,6657,7013,7508,8260,9314,10040,10201,11200,51347,51603,54888,56241,57099,57646,83666,261726,440275	BARD1,BLM,SOX2,TERF1,XPC,NAA10,KLF4,TOM1L1,NME6,CHEK2,TAOK3,METTL13,NSUN2,SUSD2,AVEN,USP28,PARP9,TIPRL,EIF2AK4	19/378
10_Member	GO Biological Processes	GO:1901987	regulation of cell cycle phase transition	-3.67551	-1.58941	580,641,5336,6657,7508,9314,11200,11319,51347,51451,51603,54888,56241,57099,57646,83666,134353,261726,440275	BARD1,BLM,PLCG2,SOX2,XPC,KLF4,CHEK2,ECD,TAOK3,LCMT1,METTL13,NSUN2,SUSD2,AVEN,USP28,PARP9,LSM11,TIPRL,EIF2AK4	19/456
10_Member	GO Biological Processes	GO:0000075	cell cycle checkpoint signaling	-3.56467	-1.51278	580,641,7508,11200,51347,54888,57646,83666,261726,440275	BARD1,BLM,XPC,CHEK2,TAOK3,NSUN2,USP28,PARP9,TIPRL,EIF2AK4	10/157
10_Member	GO Biological Processes	GO:0010564	regulation of cell cycle process	-3.55617	-1.51081	580,641,4609,5336,6657,7013,7508,8260,9314,10040,10201,11200,11319,51347,51451,51603,54888,55226,56241,57099,57132,57646,83666,134353,261726,440275	BARD1,BLM,MYC,PLCG2,SOX2,TERF1,XPC,NAA10,KLF4,TOM1L1,NME6,CHEK2,ECD,TAOK3,LCMT1,METTL13,NSUN2,NAT10,SUSD2,AVEN,CHMP1B,USP28,PARP9,LSM11,TIPRL,EIF2AK4	26/746
10_Member	GO Biological Processes	GO:0006974	DNA damage response	-3.49454	-1.45773	580,641,2968,3297,3661,4282,4609,4796,5438,7508,9557,10535,11200,25898,51347,55388,57646,64782,83666,84259,84515,85015,200558,257218,261726,440275	BARD1,BLM,GTF2H4,HSF1,IRF3,MIF,MYC,TONSL,POLR2I,XPC,CHD1L,RNASEH2A,CHEK2,RCHY1,TAOK3,MCM10,USP28,AEN,PARP9,DCUN1D5,MCM8,USP45,APLF,SHPRH,TIPRL,EIF2AK4	26/753
10_Member	GO Biological Processes	GO:0000077	DNA damage checkpoint signaling	-3.44773	-1.43066	641,7508,11200,51347,57646,83666,261726,440275	BLM,XPC,CHEK2,TAOK3,USP28,PARP9,TIPRL,EIF2AK4	8/106
10_Member	WikiPathways	WP2263	Androgen receptor network in prostate cancer	-3.33922	-1.34091	580,641,1978,2289,4609,5599,6654,11200	BARD1,BLM,EIF4EBP1,FKBP5,MYC,MAPK8,SOS1,CHEK2	8/110
10_Member	GO Biological Processes	GO:0042770	signal transduction in response to DNA damage	-3.31488	-1.32974	641,4282,7508,11200,51347,57646,83666,261726,440275	BLM,MIF,XPC,CHEK2,TAOK3,USP28,PARP9,TIPRL,EIF2AK4	9/139
10_Member	GO Biological Processes	GO:0031570	DNA integrity checkpoint signaling	-3.21042	-1.25877	641,7508,11200,51347,57646,83666,261726,440275	BLM,XPC,CHEK2,TAOK3,USP28,PARP9,TIPRL,EIF2AK4	8/115
10_Member	WikiPathways	WP1971	Integrated cancer pathway	-2.92005	-1.04828	580,641,4609,5451,11200	BARD1,BLM,MYC,POU2F1,CHEK2	5/49
10_Member	GO Biological Processes	GO:0006281	DNA repair	-2.75785	-0.937464	580,641,2968,3297,4796,5438,7508,9557,10535,11200,25898,51347,57646,83666,84515,85015,200558,257218	BARD1,BLM,GTF2H4,HSF1,TONSL,POLR2I,XPC,CHD1L,RNASEH2A,CHEK2,RCHY1,TAOK3,USP28,PARP9,MCM8,USP45,APLF,SHPRH	18/503
10_Member	GO Biological Processes	GO:0010212	response to ionizing radiation	-2.62181	-0.855316	580,641,1788,3297,4609,11200,57646,64782	BARD1,BLM,DNMT3A,HSF1,MYC,CHEK2,USP28,AEN	8/142
10_Member	GO Biological Processes	GO:0071478	cellular response to radiation	-2.54727	-0.801861	580,641,3297,4609,5481,7508,11200,57646,440275	BARD1,BLM,HSF1,MYC,PPID,XPC,CHEK2,USP28,EIF2AK4	9/179
10_Member	GO Biological Processes	GO:0007346	regulation of mitotic cell cycle	-2.26035	-0.6236	580,641,1164,1845,1978,3297,7508,9314,10040,10201,11200,11319,51347,51451,57099,134353,150465	BARD1,BLM,CKS2,DUSP3,EIF4EBP1,HSF1,XPC,KLF4,TOM1L1,NME6,CHEK2,ECD,TAOK3,LCMT1,AVEN,LSM11,TTL	17/518
11_Summary	GO Biological Processes	GO:0006767	water-soluble vitamin metabolic process	-6.39476	-3.59027	231,249,2356,4548,4552,6470,29968,55163,55312,2643,4023,8644,23590,55937,57017,79717,83666,349565,6121,2618,5340	AKR1B1,ALPL,FPGS,MTR,MTRR,SHMT1,PSAT1,PNPO,RFK,GCH1,LPL,AKR1C3,PDSS1,APOM,COQ9,PPCS,PARP9,NMNAT3,RPE65,GART,PLG	21/-
11_Member	GO Biological Processes	GO:0006767	water-soluble vitamin metabolic process	-6.39476	-3.59027	231,249,2356,4548,4552,6470,29968,55163,55312	AKR1B1,ALPL,FPGS,MTR,MTRR,SHMT1,PSAT1,PNPO,RFK	9/58
11_Member	Reactome Gene Sets	R-HSA-196854	Metabolism of vitamins and cofactors	-6.18195	-3.4016	2356,2643,4023,4548,4552,6470,8644,23590,55163,55312,55937,57017,79717,83666,349565	FPGS,GCH1,LPL,MTR,MTRR,SHMT1,AKR1C3,PDSS1,PNPO,RFK,APOM,COQ9,PPCS,PARP9,NMNAT3	15/191
11_Member	GO Biological Processes	GO:0042364	water-soluble vitamin biosynthetic process	-5.3304	-2.80792	231,29968,55163,55312	AKR1B1,PSAT1,PNPO,RFK	4/8
11_Member	GO Biological Processes	GO:0006766	vitamin metabolic process	-5.31979	-2.80374	231,249,2356,4548,4552,6121,6470,29968,55163,55312	AKR1B1,ALPL,FPGS,MTR,MTRR,RPE65,SHMT1,PSAT1,PNPO,RFK	10/98
11_Member	GO Biological Processes	GO:0042816	vitamin B6 metabolic process	-4.37397	-2.06681	249,29968,55163	ALPL,PSAT1,PNPO	3/5
11_Member	GO Biological Processes	GO:0009110	vitamin biosynthetic process	-4.07989	-1.90579	231,29968,55163,55312	AKR1B1,PSAT1,PNPO,RFK	4/15
11_Member	Reactome Gene Sets	R-HSA-196849	Metabolism of water-soluble vitamins and cofactors	-3.68235	-1.59387	2356,4548,4552,6470,55163,55312,79717,83666,349565	FPGS,MTR,MTRR,SHMT1,PNPO,RFK,PPCS,PARP9,NMNAT3	9/124
11_Member	WikiPathways	WP176	Folate metabolism	-3.03355	-1.13059	2618,4548,4552,5340,6470,55312	GART,MTR,MTRR,PLG,SHMT1,RFK	6/69
11_Member	GO Biological Processes	GO:0072525	pyridine-containing compound biosynthetic process	-2.80695	-0.962185	29968,55163,83666,349565	PSAT1,PNPO,PARP9,NMNAT3	4/31
12_Summary	GO Biological Processes	GO:0051090	regulation of DNA-binding transcription factor activity	-6.0637	-3.32792	408,409,958,1240,3055,3297,3965,4793,5336,5599,6850,8717,8915,9314,9817,10616,51389,56919,57118,59307,64320,79918,170622,440275	ARRB1,ARRB2,CD40,CMKLR1,HCK,HSF1,LGALS9,NFKBIB,PLCG2,MAPK8,SYK,TRADD,BCL10,KLF4,KEAP1,RBCK1,RWDD1,DHX33,CAMK1D,SIGIRR,RNF25,SETD6,COMMD6,EIF2AK4	24/-
12_Member	GO Biological Processes	GO:0051090	regulation of DNA-binding transcription factor activity	-6.0637	-3.32792	408,409,958,1240,3055,3297,3965,4793,5336,5599,6850,8717,8915,9314,9817,10616,51389,56919,57118,59307,64320,79918,170622,440275	ARRB1,ARRB2,CD40,CMKLR1,HCK,HSF1,LGALS9,NFKBIB,PLCG2,MAPK8,SYK,TRADD,BCL10,KLF4,KEAP1,RBCK1,RWDD1,DHX33,CAMK1D,SIGIRR,RNF25,SETD6,COMMD6,EIF2AK4	24/464
12_Member	GO Biological Processes	GO:0032088	negative regulation of NF-kappaB transcription factor activity	-3.7431	-1.64496	408,409,1240,4793,9314,10616,79918,170622	ARRB1,ARRB2,CMKLR1,NFKBIB,KLF4,RBCK1,SETD6,COMMD6	8/96
12_Member	GO Biological Processes	GO:0043433	negative regulation of DNA-binding transcription factor activity	-3.44678	-1.43066	408,409,1240,4793,9314,9817,10616,59307,79918,170622,440275	ARRB1,ARRB2,CMKLR1,NFKBIB,KLF4,KEAP1,RBCK1,SIGIRR,SETD6,COMMD6,EIF2AK4	11/193
13_Summary	WikiPathways	WP2525	Trans-sulfuration, one-carbon metabolism and related pathways	-5.79212	-3.09677	586,1120,1788,4144,4548,5723,6470,27430,29968,4552,7172,7263,2356,1634,6776,6785,27158,51647,79717,84836,166012,552900,79017	BCAT1,CHKB,DNMT3A,MAT2A,MTR,PSPH,SHMT1,MAT2B,PSAT1,MTRR,TPMT,TST,FPGS,DCN,STAT5A,ELOVL4,NDOR1,CIAO2B,PPCS,ABHD14B,CHST13,BOLA2,GGCT	23/-
13_Member	WikiPathways	WP2525	Trans-sulfuration, one-carbon metabolism and related pathways	-5.79212	-3.09677	586,1120,1788,4144,4548,5723,6470,27430,29968	BCAT1,CHKB,DNMT3A,MAT2A,MTR,PSPH,SHMT1,MAT2B,PSAT1	9/68
13_Member	Reactome Gene Sets	R-HSA-156581	Methylation	-5.69473	-3.06217	4144,4548,4552,7172,27430	MAT2A,MTR,MTRR,TPMT,MAT2B	5/14
13_Member	KEGG Pathway	hsa00270	Cysteine and methionine metabolism	-4.67633	-2.30311	586,1788,4144,4548,7263,27430,29968	BCAT1,DNMT3A,MAT2A,MTR,TST,MAT2B,PSAT1	7/52
13_Member	WikiPathways	WP704	Methylation pathways	-3.47092	-1.45074	4144,7172,27430	MAT2A,TPMT,MAT2B	3/9
13_Member	GO Biological Processes	GO:0006730	one-carbon metabolic process	-3.23924	-1.27629	2356,4144,6470,27430	FPGS,MAT2A,SHMT1,MAT2B	4/24
13_Member	GO Biological Processes	GO:0006790	sulfur compound metabolic process	-3.21942	-1.26356	1634,4144,4548,4552,6776,6785,7263,27158,27430,51647,79717,84836,166012,552900	DCN,MAT2A,MTR,MTRR,STAT5A,ELOVL4,TST,NDOR1,MAT2B,CIAO2B,PPCS,ABHD14B,CHST13,BOLA2	14/308
13_Member	GO Biological Processes	GO:0046500	S-adenosylmethionine metabolic process	-2.76889	-0.94218	4144,4552,27430	MAT2A,MTRR,MAT2B	3/15
13_Member	Reactome Gene Sets	R-HSA-156580	Phase II - Conjugation of compounds	-2.6742	-0.888632	4144,4548,4552,7172,27430,79017,84836	MAT2A,MTR,MTRR,TPMT,MAT2B,GGCT,ABHD14B	7/109
13_Member	WikiPathways	WP3580	Methionine de novo and salvage pathway	-2.27617	-0.633478	4144,4548,27430	MAT2A,MTR,MAT2B	3/22
13_Member	GO Biological Processes	GO:0044272	sulfur compound biosynthetic process	-2.00066	-0.457605	4144,4548,4552,6785,27430,79717,166012	MAT2A,MTR,MTRR,ELOVL4,MAT2B,PPCS,CHST13	7/145
14_Summary	GO Biological Processes	GO:0006390	mitochondrial transcription	-5.69473	-3.06217	5442,6182,51106,56652,84275,80324,54534,84545,11232	POLRMT,MRPL12,TFB1M,TWNK,SLC25A33,PUS1,MRPL50,MRPL43,POLG2	9/-
14_Member	GO Biological Processes	GO:0006390	mitochondrial transcription	-5.69473	-3.06217	5442,6182,51106,56652,84275	POLRMT,MRPL12,TFB1M,TWNK,SLC25A33	5/14
14_Member	GO Biological Processes	GO:0000959	mitochondrial RNA metabolic process	-4.11446	-1.90579	5442,6182,51106,56652,80324,84275	POLRMT,MRPL12,TFB1M,TWNK,PUS1,SLC25A33	6/44
14_Member	GO Biological Processes	GO:0140053	mitochondrial gene expression	-2.62181	-0.855316	5442,6182,51106,54534,56652,80324,84275,84545	POLRMT,MRPL12,TFB1M,MRPL50,TWNK,PUS1,SLC25A33,MRPL43	8/142
14_Member	GO Biological Processes	GO:0000002	mitochondrial genome maintenance	-2.11767	-0.533762	11232,56652,84275	POLG2,TWNK,SLC25A33	3/25
15_Summary	Reactome Gene Sets	R-HSA-9013149	RAC1 GTPase cycle	-5.6199	-3.00874	29,6510,6654,7410,9710,10298,10458,23370,25791,50619,51347,55971,57580,116985,5599,7321,8717,10616,65078,1445,1832,4548,11075,54509,85415,999,5519,7428,10381,10383,408,7052,9289,50848	ABR,SLC1A5,SOS1,VAV2,GARRE1,PAK4,BAIAP2,ARHGEF18,NGEF,DEF6,TAOK3,BAIAP2L1,PREX1,ARAP1,MAPK8,UBE2D1,TRADD,RBCK1,RTN4R,CSK,DSP,MTR,STMN2,RHOF,RHPN2,CDH1,PPP2R1B,VHL,TUBB3,TUBB4B,ARRB1,TGM2,ADGRG1,F11R	34/-
15_Member	Reactome Gene Sets	R-HSA-9013149	RAC1 GTPase cycle	-5.6199	-3.00874	29,6510,6654,7410,9710,10298,10458,23370,25791,50619,51347,55971,57580,116985	ABR,SLC1A5,SOS1,VAV2,GARRE1,PAK4,BAIAP2,ARHGEF18,NGEF,DEF6,TAOK3,BAIAP2L1,PREX1,ARAP1	14/185
15_Member	Reactome Gene Sets	R-HSA-9013423	RAC3 GTPase cycle	-4.62063	-2.2633	29,6510,7410,9710,10298,10458,51347,55971,57580	ABR,SLC1A5,VAV2,GARRE1,PAK4,BAIAP2,TAOK3,BAIAP2L1,PREX1	9/94
15_Member	Canonical Pathways	M241	PID RAC1 REG PATHWAY	-4.48624	-2.15888	29,6654,7410,25791,50619,57580	ABR,SOS1,VAV2,NGEF,DEF6,PREX1	6/38
15_Member	Reactome Gene Sets	R-HSA-193648	NRAGE signals death through JNK	-4.3125	-2.03143	29,5599,6654,7410,23370,25791,57580	ABR,MAPK8,SOS1,VAV2,ARHGEF18,NGEF,PREX1	7/59
15_Member	Reactome Gene Sets	R-HSA-73887	Death Receptor Signaling	-4.3118	-2.03143	29,5599,6654,7321,7410,8717,10616,23370,25791,57580,65078	ABR,MAPK8,SOS1,UBE2D1,VAV2,TRADD,RBCK1,ARHGEF18,NGEF,PREX1,RTN4R	11/154
15_Member	Reactome Gene Sets	R-HSA-9012999	RHO GTPase cycle	-4.22943	-1.96723	29,1445,1832,4548,6510,6654,7410,9710,10298,10458,11075,23370,25791,50619,51347,54509,55971,57580,85415,116985	ABR,CSK,DSP,MTR,SLC1A5,SOS1,VAV2,GARRE1,PAK4,BAIAP2,STMN2,ARHGEF18,NGEF,DEF6,TAOK3,RHOF,BAIAP2L1,PREX1,RHPN2,ARAP1	20/449
15_Member	Reactome Gene Sets	R-HSA-9013404	RAC2 GTPase cycle	-4.00831	-1.8416	29,7410,9710,10298,50619,51347,55971,57580	ABR,VAV2,GARRE1,PAK4,DEF6,TAOK3,BAIAP2L1,PREX1	8/88
15_Member	Canonical Pathways	M68	PID RHOA REG PATHWAY	-4.00359	-1.83972	29,7410,23370,25791,50619,116985	ABR,VAV2,ARHGEF18,NGEF,DEF6,ARAP1	6/46
15_Member	Reactome Gene Sets	R-HSA-193704	p75 NTR receptor-mediated signalling	-3.71187	-1.62099	29,5599,6654,7410,23370,25791,57580,65078	ABR,MAPK8,SOS1,VAV2,ARHGEF18,NGEF,PREX1,RTN4R	8/97
15_Member	Reactome Gene Sets	R-HSA-204998	Cell death signalling via NRAGE, NRIF and NADE	-3.60918	-1.54842	29,5599,6654,7410,23370,25791,57580	ABR,MAPK8,SOS1,VAV2,ARHGEF18,NGEF,PREX1	7/76
15_Member	Reactome Gene Sets	R-HSA-9716542	Signaling by Rho GTPases, Miro GTPases and RHOBTB3	-3.39973	-1.39161	29,999,1445,1832,4548,5519,6510,6654,7410,7428,9710,10298,10381,10383,10458,11075,23370,25791,50619,51347,54509,55971,57580,85415,116985	ABR,CDH1,CSK,DSP,MTR,PPP2R1B,SLC1A5,SOS1,VAV2,VHL,GARRE1,PAK4,TUBB3,TUBB4B,BAIAP2,STMN2,ARHGEF18,NGEF,DEF6,TAOK3,RHOF,BAIAP2L1,PREX1,RHPN2,ARAP1	25/722
15_Member	GO Biological Processes	GO:0051056	regulation of small GTPase mediated signal transduction	-3.36079	-1.35913	29,408,6654,7052,7410,9289,23370,25791,50619,50848,54509,57580,65078,116985	ABR,ARRB1,SOS1,TGM2,VAV2,ADGRG1,ARHGEF18,NGEF,DEF6,F11R,RHOF,PREX1,RTN4R,ARAP1	14/298
15_Member	Reactome Gene Sets	R-HSA-194315	Signaling by Rho GTPases	-3.17492	-1.23966	29,999,1445,1832,4548,5519,6510,6654,7410,9710,10298,10381,10383,10458,11075,23370,25791,50619,51347,54509,55971,57580,85415,116985	ABR,CDH1,CSK,DSP,MTR,PPP2R1B,SLC1A5,SOS1,VAV2,GARRE1,PAK4,TUBB3,TUBB4B,BAIAP2,STMN2,ARHGEF18,NGEF,DEF6,TAOK3,RHOF,BAIAP2L1,PREX1,RHPN2,ARAP1	24/706
15_Member	Reactome Gene Sets	R-HSA-416482	G alpha (12/13) signalling events	-2.69965	-0.902547	29,6654,7410,23370,25791,57580	ABR,SOS1,VAV2,ARHGEF18,NGEF,PREX1	6/80
15_Member	Reactome Gene Sets	R-HSA-8980692	RHOA GTPase cycle	-2.52902	-0.799049	29,7410,23370,25791,50619,57580,85415,116985	ABR,VAV2,ARHGEF18,NGEF,DEF6,PREX1,RHPN2,ARAP1	8/147
15_Member	Reactome Gene Sets	R-HSA-9013148	CDC42 GTPase cycle	-2.38914	-0.714524	29,7410,10298,10458,25791,50619,57580,116985	ABR,VAV2,PAK4,BAIAP2,NGEF,DEF6,PREX1,ARAP1	8/155
16_Summary	GO Biological Processes	GO:0046777	protein autophosphorylation	-5.5378	-2.94505	790,1445,1612,3055,6789,6850,7867,9833,11200,27347,29904,51347,60673,440275,5129,5599,5606,10298,26750,51422,57118,57410,140901,284217,1634,1725,4801,5481,10322,27351,28989,51126,51303,79918,84661,221143,254887,399818	CAD,CSK,DAPK1,HCK,STK4,SYK,MAPKAPK3,MELK,CHEK2,STK39,EEF2K,TAOK3,ATG101,EIF2AK4,CDK18,MAPK8,MAP2K3,PAK4,RPS6KC1,PRKAG2,CAMK1D,SCYL1,STK35,LAMA1,DCN,DHPS,NFYB,PPID,SMYD5,DESI1,NTMT1,NAA20,FKBP11,SETD6,DPY30,EEF1AKMT1,ZDHHC23,EEF1AKMT2	38/-
16_Member	GO Biological Processes	GO:0046777	protein autophosphorylation	-5.5378	-2.94505	790,1445,1612,3055,6789,6850,7867,9833,11200,27347,29904,51347,60673,440275	CAD,CSK,DAPK1,HCK,STK4,SYK,MAPKAPK3,MELK,CHEK2,STK39,EEF2K,TAOK3,ATG101,EIF2AK4	14/188
16_Member	GO Biological Processes	GO:0006468	protein phosphorylation	-3.2962	-1.31686	790,1445,1612,3055,5129,5599,5606,6789,6850,7867,9833,10298,11200,26750,27347,29904,51347,51422,57118,57410,60673,140901,284217,440275	CAD,CSK,DAPK1,HCK,CDK18,MAPK8,MAP2K3,STK4,SYK,MAPKAPK3,MELK,PAK4,CHEK2,RPS6KC1,STK39,EEF2K,TAOK3,PRKAG2,CAMK1D,SCYL1,ATG101,STK35,LAMA1,EIF2AK4	24/692
16_Member	GO Biological Processes	GO:0018193	peptidyl-amino acid modification	-2.67093	-0.88822	790,1634,1725,3055,4801,5481,5599,6789,6850,7867,10322,11200,27347,27351,28989,51126,51303,57118,79918,84661,221143,254887,399818	CAD,DCN,DHPS,HCK,NFYB,PPID,MAPK8,STK4,SYK,MAPKAPK3,SMYD5,CHEK2,STK39,DESI1,NTMT1,NAA20,FKBP11,CAMK1D,SETD6,DPY30,EEF1AKMT1,ZDHHC23,EEF1AKMT2	23/726
16_Member	GO Biological Processes	GO:0018209	peptidyl-serine modification	-2.20571	-0.587933	1634,5599,6789,6850,7867,11200,27347,28989,57118	DCN,MAPK8,STK4,SYK,MAPKAPK3,CHEK2,STK39,NTMT1,CAMK1D	9/202
17_Summary	KEGG Pathway	hsa00790	Folate biosynthesis	-5.49301	-2.90788	231,249,2356,2643,8644,8836,6510,7018,10533	AKR1B1,ALPL,FPGS,GCH1,AKR1C3,GGH,SLC1A5,TF,ATG7	9/-
17_Member	KEGG Pathway	hsa00790	Folate biosynthesis	-5.49301	-2.90788	231,249,2356,2643,8644,8836	AKR1B1,ALPL,FPGS,GCH1,AKR1C3,GGH	6/26
17_Member	WikiPathways	WP4313	Ferroptosis	-2.37577	-0.703944	2643,6510,7018,8644,10533	GCH1,SLC1A5,TF,AKR1C3,ATG7	5/65
18_Summary	GO Biological Processes	GO:0062197	cellular response to chemical stress	-5.37102	-2.82096	231,318,362,1612,3297,5599,5625,6326,9817,9833,10533,27347,51389,56616,59338,83959,116988,8815,54974	AKR1B1,NUDT2,AQP5,DAPK1,HSF1,MAPK8,PRODH,SCN2A,KEAP1,MELK,ATG7,STK39,RWDD1,DIABLO,PLEKHA1,SLC4A11,AGAP3,BANF1,THG1L	19/-
18_Member	GO Biological Processes	GO:0062197	cellular response to chemical stress	-5.37102	-2.82096	231,318,362,1612,3297,5599,5625,6326,9817,9833,10533,27347,51389,56616,59338,83959,116988	AKR1B1,NUDT2,AQP5,DAPK1,HSF1,MAPK8,PRODH,SCN2A,KEAP1,MELK,ATG7,STK39,RWDD1,DIABLO,PLEKHA1,SLC4A11,AGAP3	17/280
18_Member	GO Biological Processes	GO:0034599	cellular response to oxidative stress	-3.35938	-1.35913	318,1612,3297,5599,5625,9817,9833,51389,56616,59338,83959,116988	NUDT2,DAPK1,HSF1,MAPK8,PRODH,KEAP1,MELK,RWDD1,DIABLO,PLEKHA1,SLC4A11,AGAP3	12/230
18_Member	GO Biological Processes	GO:0008631	intrinsic apoptotic signaling pathway in response to oxidative stress	-2.46163	-0.754545	5625,9833,56616	PRODH,MELK,DIABLO	3/19
18_Member	GO Biological Processes	GO:0006979	response to oxidative stress	-2.42474	-0.726486	318,1612,3297,5599,5625,8815,9817,9833,51389,54974,56616,59338,83959,116988	NUDT2,DAPK1,HSF1,MAPK8,PRODH,BANF1,KEAP1,MELK,RWDD1,THG1L,DIABLO,PLEKHA1,SLC4A11,AGAP3	14/375
18_Member	GO Biological Processes	GO:0036473	cell death in response to oxidative stress	-2.3346	-0.67357	5625,9833,56616	PRODH,MELK,DIABLO	3/21
19_Summary	CORUM	CORUM:2716	Elongator core complex	-5.36334	-2.82096	8518,55140,55250,134637	ELP1,ELP3,ELP2,ADAT2	4/-
19_Member	CORUM	CORUM:2716	Elongator core complex	-5.36334	-2.82096	8518,55140,55250	ELP1,ELP3,ELP2	3/3
19_Member	CORUM	CORUM:1380	Elongator holo complex	-4.7666	-2.37228	8518,55140,55250	ELP1,ELP3,ELP2	3/4
19_Member	CORUM	CORUM:6332	Elongator complex (ELP1, ELP2, ELP3, ELP4, ELP5, ELP6)	-4.07826	-1.90579	8518,55140,55250	ELP1,ELP3,ELP2	3/6
19_Member	GO Biological Processes	GO:0002097	tRNA wobble base modification	-3.64915	-1.57645	8518,55140,55250,134637	ELP1,ELP3,ELP2,ADAT2	4/19
19_Member	GO Biological Processes	GO:0002098	tRNA wobble uridine modification	-2.68398	-0.895333	8518,55140,55250	ELP1,ELP3,ELP2	3/16
20_Summary	GO Biological Processes	GO:0005975	carbohydrate metabolic process	-5.35627	-2.82063	231,2171,2583,2584,2585,2760,3036,5211,5214,5372,6120,8706,9942,10020,11164,23171,25796,25948,27090,51422,57462,166012,1978,5519,29904,55844,5336,7018,7428	AKR1B1,FABP5,B4GALNT1,GALK1,GALK2,GM2A,HAS1,PFKL,PFKP,PMM1,RPE,B3GALNT1,XYLB,GNE,NUDT5,GPD1L,PGLS,KBTBD2,ST6GALNAC4,PRKAG2,MYORG,CHST13,EIF4EBP1,PPP2R1B,EEF2K,PPP2R2D,PLCG2,TF,VHL	29/-
20_Member	GO Biological Processes	GO:0005975	carbohydrate metabolic process	-5.35627	-2.82063	231,2171,2583,2584,2585,2760,3036,5211,5214,5372,6120,8706,9942,10020,11164,23171,25796,25948,27090,51422,57462,166012	AKR1B1,FABP5,B4GALNT1,GALK1,GALK2,GM2A,HAS1,PFKL,PFKP,PMM1,RPE,B3GALNT1,XYLB,GNE,NUDT5,GPD1L,PGLS,KBTBD2,ST6GALNAC4,PRKAG2,MYORG,CHST13	22/441
20_Member	GO Biological Processes	GO:0005996	monosaccharide metabolic process	-2.95434	-1.07265	231,2171,2584,2585,5211,5214,5372,9942,11164,25948	AKR1B1,FABP5,GALK1,GALK2,PFKL,PFKP,PMM1,XYLB,NUDT5,KBTBD2	10/188
20_Member	GO Biological Processes	GO:0046365	monosaccharide catabolic process	-2.92005	-1.04828	2584,5211,5214,9942,11164	GALK1,PFKL,PFKP,XYLB,NUDT5	5/49
20_Member	KEGG Pathway	hsa00030	Pentose phosphate pathway	-2.86136	-1.00473	5211,5214,6120,25796	PFKL,PFKP,RPE,PGLS	4/30
20_Member	KEGG Pathway	hsa00052	Galactose metabolism	-2.80695	-0.962185	231,2584,5211,5214	AKR1B1,GALK1,PFKL,PFKP	4/31
20_Member	KEGG Pathway	hsa00051	Fructose and mannose metabolism	-2.70401	-0.905678	231,5211,5214,5372	AKR1B1,PFKL,PFKP,PMM1	4/33
20_Member	KEGG Pathway	hsa04152	AMPK signaling pathway	-2.42017	-0.723287	1978,5211,5214,5519,29904,51422,55844	EIF4EBP1,PFKL,PFKP,PPP2R1B,EEF2K,PRKAG2,PPP2R2D	7/121
20_Member	GO Biological Processes	GO:0061615	glycolytic process through fructose-6-phosphate	-2.3963	-0.717553	2584,5211,5214	GALK1,PFKL,PFKP	3/20
20_Member	GO Biological Processes	GO:0061620	glycolytic process through glucose-6-phosphate	-2.3963	-0.717553	2584,5211,5214	GALK1,PFKL,PFKP	3/20
20_Member	GO Biological Processes	GO:0019318	hexose metabolic process	-2.32287	-0.664508	231,2171,2584,2585,5211,5214,5372,25948	AKR1B1,FABP5,GALK1,GALK2,PFKL,PFKP,PMM1,KBTBD2	8/159
20_Member	KEGG Pathway	hsa04066	HIF-1 signaling pathway	-2.04182	-0.481435	1978,5211,5214,5336,7018,7428	EIF4EBP1,PFKL,PFKP,PLCG2,TF,VHL	6/109
20_Member	GO Biological Processes	GO:0016052	carbohydrate catabolic process	-2.02332	-0.472272	2584,2760,5211,5214,9942,11164	GALK1,GM2A,PFKL,PFKP,XYLB,NUDT5	6/110

## Sheet: Δ9_D3_D0_DOWN
GroupID	Category	Term	Description	LogP	Log(q-value)	Genes	Symbols	InTerm_InList
1_Summary	GO Biological Processes	GO:0001944	vasculature development	-19.1797	-14.9185	90,302,800,1289,1464,1490,1605,1948,2049,2324,3491,3688,3725,3791,4015,5054,5156,5743,6347,6443,6444,7057,10630,57381,219699,1435,1512,5087,6935,10253,558,1287,2202,2615,5045,7431,10580,23768,57045,467,1601,2149,140885,195827,2911,58,1009,4192,5328,22801	ACVR1,ANXA2,CALD1,COL5A1,CSPG4,CCN2,DAG1,EFNB2,EPHB3,FLT4,CCN1,ITGB1,JUN,KDR,LOX,SERPINE1,PDGFRA,PTGS2,CCL2,SGCB,SGCD,THBS1,PDPN,RHOJ,UNC5B,CSF1,CTSH,PBX1,ZEB1,SPRY2,AXL,COL4A5,EFEMP1,LRRC32,FURIN,VIM,SORBS1,FLRT2,TWSG1,ATF3,DAB2,F2R,SIRPA,PRXL2C,GRM1,ACTA1,CDH11,MDK,PLAU,ITGA11	50/-
1_Member	GO Biological Processes	GO:0001944	vasculature development	-19.1797	-14.9185	90,302,800,1289,1464,1490,1605,1948,2049,2324,3491,3688,3725,3791,4015,5054,5156,5743,6347,6443,6444,7057,10630,57381,219699	ACVR1,ANXA2,CALD1,COL5A1,CSPG4,CCN2,DAG1,EFNB2,EPHB3,FLT4,CCN1,ITGB1,JUN,KDR,LOX,SERPINE1,PDGFRA,PTGS2,CCL2,SGCB,SGCD,THBS1,PDPN,RHOJ,UNC5B	25/536
1_Member	GO Biological Processes	GO:0035239	tube morphogenesis	-18.965	-14.9185	90,302,800,1435,1464,1490,1512,1605,1948,2049,2324,3491,3688,3725,3791,4015,5054,5087,5156,5743,6347,6444,6935,7057,10253,57381,219699	ACVR1,ANXA2,CALD1,CSF1,CSPG4,CCN2,CTSH,DAG1,EFNB2,EPHB3,FLT4,CCN1,ITGB1,JUN,KDR,LOX,SERPINE1,PBX1,PDGFRA,PTGS2,CCL2,SGCD,ZEB1,THBS1,SPRY2,RHOJ,UNC5B	27/679
1_Member	GO Biological Processes	GO:0048514	blood vessel morphogenesis	-17.7071	-13.9617	90,302,800,1464,1490,1605,1948,2049,2324,3491,3688,3725,3791,4015,5054,5156,5743,6347,6444,7057,57381,219699	ACVR1,ANXA2,CALD1,CSPG4,CCN2,DAG1,EFNB2,EPHB3,FLT4,CCN1,ITGB1,JUN,KDR,LOX,SERPINE1,PDGFRA,PTGS2,CCL2,SGCD,THBS1,RHOJ,UNC5B	22/430
1_Member	GO Biological Processes	GO:0001525	angiogenesis	-17.3741	-13.8047	90,302,800,1464,1490,1605,1948,2049,2324,3491,3688,3725,3791,5054,5156,5743,6347,7057,57381,219699	ACVR1,ANXA2,CALD1,CSPG4,CCN2,DAG1,EFNB2,EPHB3,FLT4,CCN1,ITGB1,JUN,KDR,SERPINE1,PDGFRA,PTGS2,CCL2,THBS1,RHOJ,UNC5B	20/336
1_Member	GO Biological Processes	GO:0001568	blood vessel development	-17.1775	-13.6751	90,302,800,1289,1464,1490,1605,1948,2049,2324,3491,3688,3725,3791,4015,5054,5156,5743,6347,6444,7057,57381,219699	ACVR1,ANXA2,CALD1,COL5A1,CSPG4,CCN2,DAG1,EFNB2,EPHB3,FLT4,CCN1,ITGB1,JUN,KDR,LOX,SERPINE1,PDGFRA,PTGS2,CCL2,SGCD,THBS1,RHOJ,UNC5B	23/517
1_Member	GO Biological Processes	GO:0007167	enzyme-linked receptor protein signaling pathway	-13.24	-10.0686	90,558,1287,1435,1464,1490,1948,2049,2202,2324,2615,3725,3791,4015,5045,5156,7431,10253,10580,23768,57045	ACVR1,AXL,COL4A5,CSF1,CSPG4,CCN2,EFNB2,EPHB3,EFEMP1,FLT4,LRRC32,JUN,KDR,LOX,FURIN,PDGFRA,VIM,SPRY2,SORBS1,FLRT2,TWSG1	21/628
1_Member	GO Biological Processes	GO:0007169	transmembrane receptor protein tyrosine kinase signaling pathway	-9.95134	-7.20545	558,1287,1435,1464,1490,1948,2049,2202,2324,3791,4015,5156,10253,10580,23768	AXL,COL4A5,CSF1,CSPG4,CCN2,EFNB2,EPHB3,EFEMP1,FLT4,KDR,LOX,PDGFRA,SPRY2,SORBS1,FLRT2	15/418
1_Member	GO Biological Processes	GO:0070372	regulation of ERK1 and ERK2 cascade	-9.43097	-6.74622	467,1490,1601,2149,2324,3491,3725,3791,5156,6347,10253,140885,195827	ATF3,CCN2,DAB2,F2R,FLT4,CCN1,JUN,KDR,PDGFRA,CCL2,SPRY2,SIRPA,PRXL2C	13/314
1_Member	GO Biological Processes	GO:0043408	regulation of MAPK cascade	-8.68448	-6.06937	467,1464,1490,1601,1605,2149,2324,2911,3491,3725,3791,5156,6347,7057,10253,140885,195827	ATF3,CSPG4,CCN2,DAB2,DAG1,F2R,FLT4,GRM1,CCN1,JUN,KDR,PDGFRA,CCL2,THBS1,SPRY2,SIRPA,PRXL2C	17/694
1_Member	WikiPathways	WP5087	Malignant pleural mesothelioma	-8.64097	-6.03383	58,467,1009,1287,1435,1490,2324,3688,3725,3791,4192,5156,5328,6347	ACTA1,ATF3,CDH11,COL4A5,CSF1,CCN2,FLT4,ITGB1,JUN,KDR,MDK,PDGFRA,PLAU,CCL2	14/440
1_Member	GO Biological Processes	GO:0070374	positive regulation of ERK1 and ERK2 cascade	-6.61366	-4.28811	1490,2149,2324,3725,3791,5156,6347,10253,195827	CCN2,F2R,FLT4,JUN,KDR,PDGFRA,CCL2,SPRY2,PRXL2C	9/221
1_Member	WikiPathways	WP4541	Hippo-Merlin signaling dysregulation	-6.27362	-4.01602	1009,1490,2324,3688,3791,5156,22801	CDH11,CCN2,FLT4,ITGB1,KDR,PDGFRA,ITGA11	7/121
1_Member	GO Biological Processes	GO:0043410	positive regulation of MAPK cascade	-6.20987	-3.96957	1464,1490,2149,2324,2911,3725,3791,5156,6347,7057,10253,195827	CSPG4,CCN2,F2R,FLT4,GRM1,JUN,KDR,PDGFRA,CCL2,THBS1,SPRY2,PRXL2C	12/494
2_Summary	Canonical Pathways	M18	PID INTEGRIN1 PATHWAY	-18.3247	-14.4543	1280,1287,1289,1301,1302,1464,3688,4192,5328,6696,7057,7412,22801,558,2152,2324,3791,5045,5156,5603,10253,23768,3725,10398,103910,1435,2149,1605,5743	COL2A1,COL4A5,COL5A1,COL11A1,COL11A2,CSPG4,ITGB1,MDK,PLAU,SPP1,THBS1,VCAM1,ITGA11,AXL,F3,FLT4,KDR,FURIN,PDGFRA,MAPK13,SPRY2,FLRT2,JUN,MYL9,MYL12B,CSF1,F2R,DAG1,PTGS2	29/-
2_Member	Canonical Pathways	M18	PID INTEGRIN1 PATHWAY	-18.3247	-14.4543	1280,1287,1289,1301,1302,1464,3688,4192,5328,6696,7057,7412,22801	COL2A1,COL4A5,COL5A1,COL11A1,COL11A2,CSPG4,ITGB1,MDK,PLAU,SPP1,THBS1,VCAM1,ITGA11	13/66
2_Member	Reactome Gene Sets	R-HSA-9006934	Signaling by Receptor Tyrosine Kinases	-11.5647	-8.55235	558,1280,1287,1289,1301,1302,2152,2324,3688,3791,4192,5045,5156,5603,6696,7057,10253,23768	AXL,COL2A1,COL4A5,COL5A1,COL11A1,COL11A2,F3,FLT4,ITGB1,KDR,MDK,FURIN,PDGFRA,MAPK13,SPP1,THBS1,SPRY2,FLRT2	18/524
2_Member	KEGG Pathway	hsa04510	Focal adhesion	-10.5152	-7.65909	1280,1287,2324,3688,3725,3791,5156,6696,7057,10398,22801,103910	COL2A1,COL4A5,FLT4,ITGB1,JUN,KDR,PDGFRA,SPP1,THBS1,MYL9,ITGA11,MYL12B	12/203
2_Member	Reactome Gene Sets	R-HSA-216083	Integrin cell surface interactions	-10.2736	-7.44457	1280,1287,1289,3688,3791,6696,7057,7412,22801	COL2A1,COL4A5,COL5A1,ITGB1,KDR,SPP1,THBS1,VCAM1,ITGA11	9/85
2_Member	WikiPathways	WP3932	Focal adhesion: PI3K-Akt-mTOR-signaling pathway	-9.63831	-6.94402	1280,1289,1301,1302,1435,2149,2324,3688,3791,5156,6696,7057,22801	COL2A1,COL5A1,COL11A1,COL11A2,CSF1,F2R,FLT4,ITGB1,KDR,PDGFRA,SPP1,THBS1,ITGA11	13/302
2_Member	WikiPathways	WP306	Focal adhesion	-8.18057	-5.62546	1280,3688,3725,3791,5156,6696,7057,10398,22801,103910	COL2A1,ITGB1,JUN,KDR,PDGFRA,SPP1,THBS1,MYL9,ITGA11,MYL12B	10/198
2_Member	KEGG Pathway	hsa04512	ECM-receptor interaction	-7.22485	-4.78583	1280,1287,1605,3688,6696,7057,22801	COL2A1,COL4A5,DAG1,ITGB1,SPP1,THBS1,ITGA11	7/88
2_Member	WikiPathways	WP4172	PI3K-Akt signaling pathway	-6.96998	-4.57187	1280,1287,1435,2149,2324,3688,3791,5156,6696,7057,22801	COL2A1,COL4A5,CSF1,F2R,FLT4,ITGB1,KDR,PDGFRA,SPP1,THBS1,ITGA11	11/339
2_Member	KEGG Pathway	hsa04151	PI3K-Akt signaling pathway	-6.7815	-4.42963	1280,1287,1435,2149,2324,3688,3791,5156,6696,7057,22801	COL2A1,COL4A5,CSF1,F2R,FLT4,ITGB1,KDR,PDGFRA,SPP1,THBS1,ITGA11	11/354
2_Member	KEGG Pathway	hsa05165	Human papillomavirus infection	-3.45965	-1.73228	1280,1287,3688,5743,6696,7057,22801	COL2A1,COL4A5,ITGB1,PTGS2,SPP1,THBS1,ITGA11	7/331
3_Summary	GO Biological Processes	GO:0097435	supramolecular fiber organization	-17.4035	-13.8047	58,302,800,1280,1289,1301,1302,1303,3688,3855,3868,4015,5045,5156,7168,7169,7431,10398,10516,10580,25802,57477,79778,84695,1287,1605,2202,3791,5054,6696,7057,7412,22801,1490,3491,23768,83716,1435,481	ACTA1,ANXA2,CALD1,COL2A1,COL5A1,COL11A1,COL11A2,COL12A1,ITGB1,KRT7,KRT16,LOX,FURIN,PDGFRA,TPM1,TPM2,VIM,MYL9,FBLN5,SORBS1,LMOD1,SHROOM4,MICALL2,LOXL3,COL4A5,DAG1,EFEMP1,KDR,SERPINE1,SPP1,THBS1,VCAM1,ITGA11,CCN2,CCN1,FLRT2,CRISPLD2,CSF1,ATP1B1	39/-
3_Member	GO Biological Processes	GO:0097435	supramolecular fiber organization	-17.4035	-13.8047	58,302,800,1280,1289,1301,1302,1303,3688,3855,3868,4015,5045,5156,7168,7169,7431,10398,10516,10580,25802,57477,79778,84695	ACTA1,ANXA2,CALD1,COL2A1,COL5A1,COL11A1,COL11A2,COL12A1,ITGB1,KRT7,KRT16,LOX,FURIN,PDGFRA,TPM1,TPM2,VIM,MYL9,FBLN5,SORBS1,LMOD1,SHROOM4,MICALL2,LOXL3	24/569
3_Member	Reactome Gene Sets	R-HSA-1474244	Extracellular matrix organization	-17.0115	-13.5671	1280,1287,1289,1301,1302,1303,1605,2202,3688,3791,4015,5045,5054,6696,7057,7412,10516,22801,84695	COL2A1,COL4A5,COL5A1,COL11A1,COL11A2,COL12A1,DAG1,EFEMP1,ITGB1,KDR,LOX,FURIN,SERPINE1,SPP1,THBS1,VCAM1,FBLN5,ITGA11,LOXL3	19/300
3_Member	GO Biological Processes	GO:0030198	extracellular matrix organization	-16.462	-13.0862	302,1280,1287,1289,1301,1302,1303,1490,1605,3491,3688,4015,5045,5156,10516,23768,83716,84695	ANXA2,COL2A1,COL4A5,COL5A1,COL11A1,COL11A2,COL12A1,CCN2,DAG1,CCN1,ITGB1,LOX,FURIN,PDGFRA,FBLN5,FLRT2,CRISPLD2,LOXL3	18/272
3_Member	GO Biological Processes	GO:0043062	extracellular structure organization	-16.4337	-13.0862	302,1280,1287,1289,1301,1302,1303,1490,1605,3491,3688,4015,5045,5156,10516,23768,83716,84695	ANXA2,COL2A1,COL4A5,COL5A1,COL11A1,COL11A2,COL12A1,CCN2,DAG1,CCN1,ITGB1,LOX,FURIN,PDGFRA,FBLN5,FLRT2,CRISPLD2,LOXL3	18/273
3_Member	GO Biological Processes	GO:0045229	external encapsulating structure organization	-16.3776	-13.0715	302,1280,1287,1289,1301,1302,1303,1490,1605,3491,3688,4015,5045,5156,10516,23768,83716,84695	ANXA2,COL2A1,COL4A5,COL5A1,COL11A1,COL11A2,COL12A1,CCN2,DAG1,CCN1,ITGB1,LOX,FURIN,PDGFRA,FBLN5,FLRT2,CRISPLD2,LOXL3	18/275
3_Member	Canonical Pathways	M160	PID AVB3 INTEGRIN PATHWAY	-10.8291	-7.94395	1280,1287,1289,1301,1302,1303,1435,3791,6696	COL2A1,COL4A5,COL5A1,COL11A1,COL11A2,COL12A1,CSF1,KDR,SPP1	9/74
3_Member	GO Biological Processes	GO:0030199	collagen fibril organization	-10.1331	-7.32968	302,1280,1289,1301,1302,1303,4015,84695	ANXA2,COL2A1,COL5A1,COL11A1,COL11A2,COL12A1,LOX,LOXL3	8/58
3_Member	Reactome Gene Sets	R-HSA-3000171	Non-integrin membrane-ECM interactions	-10.0713	-7.29466	1280,1287,1289,1301,1302,1605,3688,7057	COL2A1,COL4A5,COL5A1,COL11A1,COL11A2,DAG1,ITGB1,THBS1	8/59
3_Member	Reactome Gene Sets	R-HSA-2022090	Assembly of collagen fibrils and other multimeric structures	-9.95089	-7.20545	1280,1287,1289,1301,1302,1303,4015,84695	COL2A1,COL4A5,COL5A1,COL11A1,COL11A2,COL12A1,LOX,LOXL3	8/61
3_Member	Reactome Gene Sets	R-HSA-1474290	Collagen formation	-8.5717	-5.97238	1280,1287,1289,1301,1302,1303,4015,84695	COL2A1,COL4A5,COL5A1,COL11A1,COL11A2,COL12A1,LOX,LOXL3	8/90
3_Member	Reactome Gene Sets	R-HSA-186797	Signaling by PDGF	-8.50718	-5.92311	1280,1287,1289,5045,5156,6696,7057	COL2A1,COL4A5,COL5A1,FURIN,PDGFRA,SPP1,THBS1	7/58
3_Member	Reactome Gene Sets	R-HSA-1442490	Collagen degradation	-8.20049	-5.63831	1280,1287,1289,1301,1302,1303,5045	COL2A1,COL4A5,COL5A1,COL11A1,COL11A2,COL12A1,FURIN	7/64
3_Member	Canonical Pathways	M3005	NABA COLLAGENS	-7.69011	-5.21183	1280,1287,1289,1301,1302,1303	COL2A1,COL4A5,COL5A1,COL11A1,COL11A2,COL12A1	6/44
3_Member	Reactome Gene Sets	R-HSA-8948216	Collagen chain trimerization	-7.69011	-5.21183	1280,1287,1289,1301,1302,1303	COL2A1,COL4A5,COL5A1,COL11A1,COL11A2,COL12A1	6/44
3_Member	Canonical Pathways	M198	PID SYNDECAN 1 PATHWAY	-7.57004	-5.10335	1280,1287,1289,1301,1302,1303	COL2A1,COL4A5,COL5A1,COL11A1,COL11A2,COL12A1	6/46
3_Member	Reactome Gene Sets	R-HSA-1474228	Degradation of the extracellular matrix	-7.05691	-4.65389	1280,1287,1289,1301,1302,1303,5045,6696	COL2A1,COL4A5,COL5A1,COL11A1,COL11A2,COL12A1,FURIN,SPP1	8/140
3_Member	Reactome Gene Sets	R-HSA-8874081	MET activates PTK2 signaling	-6.94259	-4.55887	1280,1289,1301,1302,3688	COL2A1,COL5A1,COL11A1,COL11A2,ITGB1	5/30
3_Member	KEGG Pathway	hsa04974	Protein digestion and absorption	-6.75165	-4.40847	481,1280,1287,1289,1301,1302,1303	ATP1B1,COL2A1,COL4A5,COL5A1,COL11A1,COL11A2,COL12A1	7/103
3_Member	Reactome Gene Sets	R-HSA-1650814	Collagen biosynthesis and modifying enzymes	-6.57173	-4.25361	1280,1287,1289,1301,1302,1303	COL2A1,COL4A5,COL5A1,COL11A1,COL11A2,COL12A1	6/67
3_Member	Reactome Gene Sets	R-HSA-3000178	ECM proteoglycans	-6.24366	-3.98958	1280,1287,1289,1605,3688,5054	COL2A1,COL4A5,COL5A1,DAG1,ITGB1,SERPINE1	6/76
3_Member	Reactome Gene Sets	R-HSA-8875878	MET promotes cell motility	-6.23671	-3.98958	1280,1289,1301,1302,3688	COL2A1,COL5A1,COL11A1,COL11A2,ITGB1	5/41
3_Member	Reactome Gene Sets	R-HSA-6806834	Signaling by MET	-4.81027	-2.8032	1280,1289,1301,1302,3688	COL2A1,COL5A1,COL11A1,COL11A2,ITGB1	5/79
3_Member	Reactome Gene Sets	R-HSA-419037	NCAM1 interactions	-3.21496	-1.5321	1280,1287,1289	COL2A1,COL4A5,COL5A1	3/42
3_Member	Reactome Gene Sets	R-HSA-375165	NCAM signaling for neurite out-growth	-2.70205	-1.11797	1280,1287,1289	COL2A1,COL4A5,COL5A1	3/63
3_Member	WikiPathways	WP2064	Neural crest differentiation	-2.12606	-0.632858	1280,1302,3688	COL2A1,COL11A2,ITGB1	3/101
4_Summary	GO Biological Processes	GO:0030335	positive regulation of cell migration	-15.1759	-11.9076	90,301,1435,1512,1601,2149,2152,2324,3491,3688,3725,3791,4192,5054,5156,5328,5743,7057,8840,10253,10630,57381,8091,64102	ACVR1,ANXA1,CSF1,CTSH,DAB2,F2R,F3,FLT4,CCN1,ITGB1,JUN,KDR,MDK,SERPINE1,PDGFRA,PLAU,PTGS2,THBS1,CCN4,SPRY2,PDPN,RHOJ,HMGA2,TNMD	24/-
4_Member	GO Biological Processes	GO:0030335	positive regulation of cell migration	-15.1759	-11.9076	90,301,1435,1512,1601,2149,2152,2324,3491,3688,3725,3791,4192,5054,5156,5328,5743,7057,8840,10253,10630,57381	ACVR1,ANXA1,CSF1,CTSH,DAB2,F2R,F3,FLT4,CCN1,ITGB1,JUN,KDR,MDK,SERPINE1,PDGFRA,PLAU,PTGS2,THBS1,CCN4,SPRY2,PDPN,RHOJ	22/568
4_Member	GO Biological Processes	GO:2000147	positive regulation of cell motility	-14.7906	-11.557	90,301,1435,1512,1601,2149,2152,2324,3491,3688,3725,3791,4192,5054,5156,5328,5743,7057,8840,10253,10630,57381	ACVR1,ANXA1,CSF1,CTSH,DAB2,F2R,F3,FLT4,CCN1,ITGB1,JUN,KDR,MDK,SERPINE1,PDGFRA,PLAU,PTGS2,THBS1,CCN4,SPRY2,PDPN,RHOJ	22/593
4_Member	GO Biological Processes	GO:0040017	positive regulation of locomotion	-14.568	-11.3666	90,301,1435,1512,1601,2149,2152,2324,3491,3688,3725,3791,4192,5054,5156,5328,5743,7057,8840,10253,10630,57381	ACVR1,ANXA1,CSF1,CTSH,DAB2,F2R,F3,FLT4,CCN1,ITGB1,JUN,KDR,MDK,SERPINE1,PDGFRA,PLAU,PTGS2,THBS1,CCN4,SPRY2,PDPN,RHOJ	22/608
4_Member	GO Biological Processes	GO:0045765	regulation of angiogenesis	-6.83087	-4.46805	1512,2152,3688,3791,4192,5054,7057,8091,10253,57381,64102	CTSH,F3,ITGB1,KDR,MDK,SERPINE1,THBS1,HMGA2,SPRY2,RHOJ,TNMD	11/350
4_Member	GO Biological Processes	GO:1901342	regulation of vasculature development	-6.75705	-4.40955	1512,2152,3688,3791,4192,5054,7057,8091,10253,57381,64102	CTSH,F3,ITGB1,KDR,MDK,SERPINE1,THBS1,HMGA2,SPRY2,RHOJ,TNMD	11/356
4_Member	GO Biological Processes	GO:0045766	positive regulation of angiogenesis	-6.1305	-3.9127	1512,2152,3688,3791,4192,5054,7057,8091	CTSH,F3,ITGB1,KDR,MDK,SERPINE1,THBS1,HMGA2	8/185
4_Member	GO Biological Processes	GO:1904018	positive regulation of vasculature development	-6.1305	-3.9127	1512,2152,3688,3791,4192,5054,7057,8091	CTSH,F3,ITGB1,KDR,MDK,SERPINE1,THBS1,HMGA2	8/185
5_Summary	Reactome Gene Sets	R-HSA-445355	Smooth Muscle Contraction	-12.8837	-9.74032	301,302,800,7168,7169,10398,10580,25802,103910,58,481,7431,3688,5156,6444,6525,10630,23384,57381,57477,79778,4015,6443,90,55605	ANXA1,ANXA2,CALD1,TPM1,TPM2,MYL9,SORBS1,LMOD1,MYL12B,ACTA1,ATP1B1,VIM,ITGB1,PDGFRA,SGCD,SMTN,PDPN,SPECC1L,RHOJ,SHROOM4,MICALL2,LOX,SGCB,ACVR1,KIF21A	25/-
5_Member	Reactome Gene Sets	R-HSA-445355	Smooth Muscle Contraction	-12.8837	-9.74032	301,302,800,7168,7169,10398,10580,25802,103910	ANXA1,ANXA2,CALD1,TPM1,TPM2,MYL9,SORBS1,LMOD1,MYL12B	9/45
5_Member	Reactome Gene Sets	R-HSA-397014	Muscle contraction	-10.4656	-7.6232	58,301,302,481,800,7168,7169,7431,10398,10580,25802,103910	ACTA1,ANXA1,ANXA2,ATP1B1,CALD1,TPM1,TPM2,VIM,MYL9,SORBS1,LMOD1,MYL12B	12/205
5_Member	GO Biological Processes	GO:0030029	actin filament-based process	-9.6739	-6.96985	58,301,800,3688,5156,6444,6525,7168,7169,10398,10580,10630,23384,25802,57381,57477,79778	ACTA1,ANXA1,CALD1,ITGB1,PDGFRA,SGCD,SMTN,TPM1,TPM2,MYL9,SORBS1,PDPN,SPECC1L,LMOD1,RHOJ,SHROOM4,MICALL2	17/597
5_Member	GO Biological Processes	GO:0030036	actin cytoskeleton organization	-8.47387	-5.89721	58,301,800,3688,5156,6525,7168,7169,10398,10580,23384,25802,57381,57477,79778	ACTA1,ANXA1,CALD1,ITGB1,PDGFRA,SMTN,TPM1,TPM2,MYL9,SORBS1,SPECC1L,LMOD1,RHOJ,SHROOM4,MICALL2	15/536
5_Member	GO Biological Processes	GO:0055001	muscle cell development	-7.65548	-5.18304	58,3688,4015,5156,6443,6444,7168,10398,25802	ACTA1,ITGB1,LOX,PDGFRA,SGCB,SGCD,TPM1,MYL9,LMOD1	9/167
5_Member	GO Biological Processes	GO:0042692	muscle cell differentiation	-6.83529	-4.46805	58,90,3688,4015,5156,6443,6444,7168,10398,25802	ACTA1,ACVR1,ITGB1,LOX,PDGFRA,SGCB,SGCD,TPM1,MYL9,LMOD1	10/275
5_Member	GO Biological Processes	GO:0051146	striated muscle cell differentiation	-6.78387	-4.42963	58,90,3688,5156,6443,6444,7168,10398,25802	ACTA1,ACVR1,ITGB1,PDGFRA,SGCB,SGCD,TPM1,MYL9,LMOD1	9/211
5_Member	GO Biological Processes	GO:0030239	myofibril assembly	-6.69176	-4.35709	58,3688,5156,7168,10398,25802	ACTA1,ITGB1,PDGFRA,TPM1,MYL9,LMOD1	6/64
5_Member	GO Biological Processes	GO:0055002	striated muscle cell development	-6.65108	-4.32061	58,3688,5156,7168,10398,25802	ACTA1,ITGB1,PDGFRA,TPM1,MYL9,LMOD1	6/65
5_Member	GO Biological Processes	GO:0031032	actomyosin structure organization	-6.42388	-4.12559	58,3688,5156,7168,10398,10580,25802	ACTA1,ITGB1,PDGFRA,TPM1,MYL9,SORBS1,LMOD1	7/115
5_Member	WikiPathways	WP383	Striated muscle contraction pathway	-6.40668	-4.11225	58,7168,7169,7431,10398	ACTA1,TPM1,TPM2,VIM,MYL9	5/38
5_Member	GO Biological Processes	GO:0006936	muscle contraction	-5.42457	-3.30481	58,481,800,6444,6525,7168,7169,25802	ACTA1,ATP1B1,CALD1,SGCD,SMTN,TPM1,TPM2,LMOD1	8/230
5_Member	GO Biological Processes	GO:0010927	cellular component assembly involved in morphogenesis	-5.18821	-3.11876	58,3688,5156,7168,10398,25802	ACTA1,ITGB1,PDGFRA,TPM1,MYL9,LMOD1	6/115
5_Member	GO Biological Processes	GO:0007015	actin filament organization	-5.02271	-2.97894	58,800,7168,7169,10580,25802,57477,79778	ACTA1,CALD1,TPM1,TPM2,SORBS1,LMOD1,SHROOM4,MICALL2	8/261
5_Member	Reactome Gene Sets	R-HSA-390522	Striated Muscle Contraction	-4.91452	-2.8954	58,7168,7169,7431	ACTA1,TPM1,TPM2,VIM	4/36
5_Member	GO Biological Processes	GO:0003012	muscle system process	-4.72524	-2.73074	58,481,800,6444,6525,7168,7169,25802	ACTA1,ATP1B1,CALD1,SGCD,SMTN,TPM1,TPM2,LMOD1	8/287
5_Member	KEGG Pathway	hsa04814	Motor proteins	-3.92357	-2.09194	58,7168,7169,10398,55605,103910	ACTA1,TPM1,TPM2,MYL9,KIF21A,MYL12B	6/193
5_Member	GO Biological Processes	GO:0140694	non-membrane-bounded organelle assembly	-2.74026	-1.14557	58,3688,5156,7168,10398,25802	ACTA1,ITGB1,PDGFRA,TPM1,MYL9,LMOD1	6/324
6_Summary	GO Biological Processes	GO:1903034	regulation of response to wounding	-12.6875	-9.57045	301,302,2149,2152,3688,4192,5054,5156,5328,6696,7057,8840,90102,558,5066,10398,10630,197,481,5099,55605,140885,5045,6347	ANXA1,ANXA2,F2R,F3,ITGB1,MDK,SERPINE1,PDGFRA,PLAU,SPP1,THBS1,CCN4,PHLDB2,AXL,PAM,MYL9,PDPN,AHSG,ATP1B1,PCDH7,KIF21A,SIRPA,FURIN,CCL2	24/-
6_Member	GO Biological Processes	GO:1903034	regulation of response to wounding	-12.6875	-9.57045	301,302,2149,2152,3688,4192,5054,5156,5328,6696,7057,8840,90102	ANXA1,ANXA2,F2R,F3,ITGB1,MDK,SERPINE1,PDGFRA,PLAU,SPP1,THBS1,CCN4,PHLDB2	13/173
6_Member	GO Biological Processes	GO:0061041	regulation of wound healing	-11.1528	-8.20326	301,302,2149,2152,3688,5054,5156,5328,7057,8840,90102	ANXA1,ANXA2,F2R,F3,ITGB1,SERPINE1,PDGFRA,PLAU,THBS1,CCN4,PHLDB2	11/136
6_Member	GO Biological Processes	GO:1903036	positive regulation of response to wounding	-10.7216	-7.85126	301,2149,2152,3688,4192,5054,5328,7057,8840	ANXA1,F2R,F3,ITGB1,MDK,SERPINE1,PLAU,THBS1,CCN4	9/76
6_Member	GO Biological Processes	GO:0090303	positive regulation of wound healing	-9.89231	-7.15759	301,2149,2152,3688,5054,5328,7057,8840	ANXA1,F2R,F3,ITGB1,SERPINE1,PLAU,THBS1,CCN4	8/62
6_Member	GO Biological Processes	GO:0030193	regulation of blood coagulation	-7.96779	-5.43983	302,2149,2152,5054,5156,5328,7057	ANXA2,F2R,F3,SERPINE1,PDGFRA,PLAU,THBS1	7/69
6_Member	GO Biological Processes	GO:1900046	regulation of hemostasis	-7.87977	-5.35834	302,2149,2152,5054,5156,5328,7057	ANXA2,F2R,F3,SERPINE1,PDGFRA,PLAU,THBS1	7/71
6_Member	GO Biological Processes	GO:0050818	regulation of coagulation	-7.75264	-5.24998	302,2149,2152,5054,5156,5328,7057	ANXA2,F2R,F3,SERPINE1,PDGFRA,PLAU,THBS1	7/74
6_Member	GO Biological Processes	GO:0030194	positive regulation of blood coagulation	-7.10123	-4.68314	2149,2152,5054,5328,7057	F2R,F3,SERPINE1,PLAU,THBS1	5/28
6_Member	GO Biological Processes	GO:1900048	positive regulation of hemostasis	-7.10123	-4.68314	2149,2152,5054,5328,7057	F2R,F3,SERPINE1,PLAU,THBS1	5/28
6_Member	GO Biological Processes	GO:1903035	negative regulation of response to wounding	-7.05803	-4.65389	302,4192,5054,5156,5328,6696,90102	ANXA2,MDK,SERPINE1,PDGFRA,PLAU,SPP1,PHLDB2	7/93
6_Member	GO Biological Processes	GO:0050820	positive regulation of coagulation	-6.94259	-4.55887	2149,2152,5054,5328,7057	F2R,F3,SERPINE1,PLAU,THBS1	5/30
6_Member	GO Biological Processes	GO:0050878	regulation of body fluid levels	-6.84331	-4.46805	302,558,2149,2152,5054,5066,5156,5328,7057,10398,10630	ANXA2,AXL,F2R,F3,SERPINE1,PAM,PDGFRA,PLAU,THBS1,MYL9,PDPN	11/349
6_Member	GO Biological Processes	GO:0010755	regulation of plasminogen activation	-6.17519	-3.93827	302,5054,5328,7057	ANXA2,SERPINE1,PLAU,THBS1	4/18
6_Member	Reactome Gene Sets	R-HSA-109582	Hemostasis	-5.96366	-3.77452	197,302,481,2149,2152,3688,5054,5099,5328,7057,10630,55605,140885	AHSG,ANXA2,ATP1B1,F2R,F3,ITGB1,SERPINE1,PCDH7,PLAU,THBS1,PDPN,KIF21A,SIRPA	13/621
6_Member	GO Biological Processes	GO:0032102	negative regulation of response to external stimulus	-5.62059	-3.46341	302,4192,5045,5054,5156,5328,6347,6696,7057,90102,140885	ANXA2,MDK,FURIN,SERPINE1,PDGFRA,PLAU,CCL2,SPP1,THBS1,PHLDB2,SIRPA	11/465
6_Member	GO Biological Processes	GO:0010757	negative regulation of plasminogen activation	-5.48433	-3.3543	5054,5328,7057	SERPINE1,PLAU,THBS1	3/8
6_Member	GO Biological Processes	GO:0061045	negative regulation of wound healing	-4.97833	-2.94469	302,5054,5156,5328,90102	ANXA2,SERPINE1,PDGFRA,PLAU,PHLDB2	5/73
6_Member	GO Biological Processes	GO:0051918	negative regulation of fibrinolysis	-4.7824	-2.7832	5054,5328,7057	SERPINE1,PLAU,THBS1	3/13
6_Member	Reactome Gene Sets	R-HSA-75205	Dissolution of Fibrin Clot	-4.7824	-2.7832	302,5054,5328	ANXA2,SERPINE1,PLAU	3/13
6_Member	GO Biological Processes	GO:0030195	negative regulation of blood coagulation	-4.52337	-2.56326	302,5054,5156,5328	ANXA2,SERPINE1,PDGFRA,PLAU	4/45
6_Member	GO Biological Processes	GO:1900047	negative regulation of hemostasis	-4.48518	-2.53735	302,5054,5156,5328	ANXA2,SERPINE1,PDGFRA,PLAU	4/46
6_Member	GO Biological Processes	GO:0050819	negative regulation of coagulation	-4.37573	-2.45147	302,5054,5156,5328	ANXA2,SERPINE1,PDGFRA,PLAU	4/49
6_Member	GO Biological Processes	GO:0051917	regulation of fibrinolysis	-4.33332	-2.41878	5054,5328,7057	SERPINE1,PLAU,THBS1	3/18
6_Member	GO Biological Processes	GO:0042730	fibrinolysis	-4.25993	-2.36113	302,5054,5328	ANXA2,SERPINE1,PLAU	3/19
6_Member	WikiPathways	WP558	Complement and coagulation cascades	-4.08602	-2.21564	2149,2152,5054,5328	F2R,F3,SERPINE1,PLAU	4/58
6_Member	WikiPathways	WP272	Blood clotting cascade	-4.06248	-2.19648	2152,5054,5328	F3,SERPINE1,PLAU	3/22
6_Member	GO Biological Processes	GO:0070613	regulation of protein processing	-3.86642	-2.05039	302,5054,5328,7057	ANXA2,SERPINE1,PLAU,THBS1	4/66
6_Member	GO Biological Processes	GO:1903317	regulation of protein maturation	-3.76713	-1.97471	302,5054,5328,7057	ANXA2,SERPINE1,PLAU,THBS1	4/70
6_Member	GO Biological Processes	GO:0010955	negative regulation of protein processing	-3.69595	-1.92479	5054,5328,7057	SERPINE1,PLAU,THBS1	3/29
6_Member	GO Biological Processes	GO:1903318	negative regulation of protein maturation	-3.69595	-1.92479	5054,5328,7057	SERPINE1,PLAU,THBS1	3/29
6_Member	KEGG Pathway	hsa04610	Complement and coagulation cascades	-3.42339	-1.7012	2149,2152,5054,5328	F2R,F3,SERPINE1,PLAU	4/86
6_Member	Canonical Pathways	M174	PID UPA UPAR PATHWAY	-3.21496	-1.5321	3688,5054,5328	ITGB1,SERPINE1,PLAU	3/42
6_Member	GO Biological Processes	GO:0032677	regulation of interleukin-8 production	-3.12719	-1.46038	301,2149,2152,5054	ANXA1,F2R,F3,SERPINE1	4/103
6_Member	GO Biological Processes	GO:0032757	positive regulation of interleukin-8 production	-2.70205	-1.11797	2149,2152,5054	F2R,F3,SERPINE1	3/63
6_Member	GO Biological Processes	GO:0010469	regulation of signaling receptor activity	-2.59132	-1.02413	3688,5054,5328,6347	ITGB1,SERPINE1,PLAU,CCL2	4/144
7_Summary	GO Biological Processes	GO:0071363	cellular response to growth factor stimulus	-12.0657	-8.97346	90,301,1280,1490,1601,2324,2615,3725,3791,5045,5156,6347,6935,7057,7412,10253,23768,57045,1948,2149,5743,7168,9536,10630,64102,7431	ACVR1,ANXA1,COL2A1,CCN2,DAB2,FLT4,LRRC32,JUN,KDR,FURIN,PDGFRA,CCL2,ZEB1,THBS1,VCAM1,SPRY2,FLRT2,TWSG1,EFNB2,F2R,PTGS2,TPM1,PTGES,PDPN,TNMD,VIM	26/-
7_Member	GO Biological Processes	GO:0071363	cellular response to growth factor stimulus	-12.0657	-8.97346	90,301,1280,1490,1601,2324,2615,3725,3791,5045,5156,6347,6935,7057,7412,10253,23768,57045	ACVR1,ANXA1,COL2A1,CCN2,DAB2,FLT4,LRRC32,JUN,KDR,FURIN,PDGFRA,CCL2,ZEB1,THBS1,VCAM1,SPRY2,FLRT2,TWSG1	18/489
7_Member	GO Biological Processes	GO:0070848	response to growth factor	-11.6062	-8.55969	90,301,1280,1490,1601,2324,2615,3725,3791,5045,5156,6347,6935,7057,7412,10253,23768,57045	ACVR1,ANXA1,COL2A1,CCN2,DAB2,FLT4,LRRC32,JUN,KDR,FURIN,PDGFRA,CCL2,ZEB1,THBS1,VCAM1,SPRY2,FLRT2,TWSG1	18/521
7_Member	GO Biological Processes	GO:0008285	negative regulation of cell population proliferation	-6.30012	-4.02817	1601,1948,2149,2615,3725,5743,6347,6935,7057,7168,9536,10253,10630,57045,64102	DAB2,EFNB2,F2R,LRRC32,JUN,PTGS2,CCL2,ZEB1,THBS1,TPM1,PTGES,SPRY2,PDPN,TWSG1,TNMD	15/787
7_Member	GO Biological Processes	GO:0071560	cellular response to transforming growth factor beta stimulus	-5.42443	-3.30481	90,1601,2615,3725,5045,6935,57045	ACVR1,DAB2,LRRC32,JUN,FURIN,ZEB1,TWSG1	7/162
7_Member	GO Biological Processes	GO:0071559	response to transforming growth factor beta	-5.30327	-3.20373	90,1601,2615,3725,5045,6935,57045	ACVR1,DAB2,LRRC32,JUN,FURIN,ZEB1,TWSG1	7/169
7_Member	GO Biological Processes	GO:0007179	transforming growth factor beta receptor signaling pathway	-4.2943	-2.38613	90,2615,3725,5045,57045	ACVR1,LRRC32,JUN,FURIN,TWSG1	5/101
7_Member	GO Biological Processes	GO:0007178	transmembrane receptor protein serine/threonine kinase signaling pathway	-3.78096	-1.98612	90,2615,3725,5045,7431,57045	ACVR1,LRRC32,JUN,FURIN,VIM,TWSG1	6/205
8_Summary	GO Biological Processes	GO:0048729	tissue morphogenesis	-12.0069	-8.93816	58,90,1289,1301,1435,1512,1605,1948,2650,3491,3688,3791,3868,5087,7168,8091,10253,10630,57045,1490,2324,4015,5156,83716,84695,5603,6347	ACTA1,ACVR1,COL5A1,COL11A1,CSF1,CTSH,DAG1,EFNB2,GCNT1,CCN1,ITGB1,KDR,KRT16,PBX1,TPM1,HMGA2,SPRY2,PDPN,TWSG1,CCN2,FLT4,LOX,PDGFRA,CRISPLD2,LOXL3,MAPK13,CCL2	27/-
8_Member	GO Biological Processes	GO:0048729	tissue morphogenesis	-12.0069	-8.93816	58,90,1289,1301,1435,1512,1605,1948,2650,3491,3688,3791,3868,5087,7168,8091,10253,10630,57045	ACTA1,ACVR1,COL5A1,COL11A1,CSF1,CTSH,DAG1,EFNB2,GCNT1,CCN1,ITGB1,KDR,KRT16,PBX1,TPM1,HMGA2,SPRY2,PDPN,TWSG1	19/567
8_Member	GO Biological Processes	GO:0030324	lung development	-9.78006	-7.05581	1490,1512,1605,2324,3791,4015,5156,10253,10630,83716,84695	CCN2,CTSH,DAG1,FLT4,KDR,LOX,PDGFRA,SPRY2,PDPN,CRISPLD2,LOXL3	11/182
8_Member	GO Biological Processes	GO:0030323	respiratory tube development	-9.67898	-6.96985	1490,1512,1605,2324,3791,4015,5156,10253,10630,83716,84695	CCN2,CTSH,DAG1,FLT4,KDR,LOX,PDGFRA,SPRY2,PDPN,CRISPLD2,LOXL3	11/186
8_Member	GO Biological Processes	GO:0060541	respiratory system development	-9.18438	-6.50897	1490,1512,1605,2324,3791,4015,5156,10253,10630,83716,84695	CCN2,CTSH,DAG1,FLT4,KDR,LOX,PDGFRA,SPRY2,PDPN,CRISPLD2,LOXL3	11/207
8_Member	GO Biological Processes	GO:0002009	morphogenesis of an epithelium	-7.53693	-5.07591	90,1289,1435,1512,1605,1948,3491,3688,3791,3868,5087,10253,10630	ACVR1,COL5A1,CSF1,CTSH,DAG1,EFNB2,CCN1,ITGB1,KDR,KRT16,PBX1,SPRY2,PDPN	13/452
8_Member	GO Biological Processes	GO:0048754	branching morphogenesis of an epithelial tube	-5.90946	-3.72927	90,1435,1512,1605,3791,5087,10253	ACVR1,CSF1,CTSH,DAG1,KDR,PBX1,SPRY2	7/137
8_Member	GO Biological Processes	GO:0061138	morphogenesis of a branching epithelium	-5.37181	-3.26235	90,1435,1512,1605,3791,5087,10253	ACVR1,CSF1,CTSH,DAG1,KDR,PBX1,SPRY2	7/165
8_Member	GO Biological Processes	GO:0001763	morphogenesis of a branching structure	-5.20373	-3.12574	90,1435,1512,1605,3791,5087,10253	ACVR1,CSF1,CTSH,DAG1,KDR,PBX1,SPRY2	7/175
8_Member	GO Biological Processes	GO:0060562	epithelial tube morphogenesis	-4.46693	-2.5256	90,1435,1512,1605,1948,3791,5087,10253	ACVR1,CSF1,CTSH,DAG1,EFNB2,KDR,PBX1,SPRY2	8/312
8_Member	GO Biological Processes	GO:0060441	epithelial tube branching involved in lung morphogenesis	-3.84001	-2.02952	1512,1605,10253	CTSH,DAG1,SPRY2	3/26
8_Member	GO Biological Processes	GO:0060425	lung morphogenesis	-3.0986	-1.43543	1512,1605,10253	CTSH,DAG1,SPRY2	3/46
8_Member	GO Biological Processes	GO:0070371	ERK1 and ERK2 cascade	-2.91886	-1.29645	1512,3791,10253	CTSH,KDR,SPRY2	3/53
8_Member	GO Biological Processes	GO:0000165	MAPK cascade	-2.81135	-1.20262	1512,3791,5603,6347,10253	CTSH,KDR,MAPK13,CCL2,SPRY2	5/212
9_Summary	GO Biological Processes	GO:0009611	response to wounding	-11.5574	-8.55235	558,1289,1490,1605,2149,2152,3491,3688,3725,3791,4015,4192,5156,5328,7168,10398,10630,1464	AXL,COL5A1,CCN2,DAG1,F2R,F3,CCN1,ITGB1,JUN,KDR,LOX,MDK,PDGFRA,PLAU,TPM1,MYL9,PDPN,CSPG4	18/-
9_Member	GO Biological Processes	GO:0009611	response to wounding	-11.5574	-8.55235	558,1289,1490,1605,2149,2152,3491,3688,3725,3791,4015,4192,5156,5328,7168,10398,10630	AXL,COL5A1,CCN2,DAG1,F2R,F3,CCN1,ITGB1,JUN,KDR,LOX,MDK,PDGFRA,PLAU,TPM1,MYL9,PDPN	17/452
9_Member	GO Biological Processes	GO:0042060	wound healing	-10.1957	-7.3797	558,1289,1605,2149,2152,3491,3688,3791,4015,5156,5328,7168,10398,10630	AXL,COL5A1,DAG1,F2R,F3,CCN1,ITGB1,KDR,LOX,PDGFRA,PLAU,TPM1,MYL9,PDPN	14/334
9_Member	GO Biological Processes	GO:0007596	blood coagulation	-5.22006	-3.135	558,2149,2152,5156,5328,10398,10630	AXL,F2R,F3,PDGFRA,PLAU,MYL9,PDPN	7/174
9_Member	GO Biological Processes	GO:0050817	coagulation	-5.18751	-3.11876	558,2149,2152,5156,5328,10398,10630	AXL,F2R,F3,PDGFRA,PLAU,MYL9,PDPN	7/176
9_Member	GO Biological Processes	GO:0007599	hemostasis	-5.12363	-3.06168	558,2149,2152,5156,5328,10398,10630	AXL,F2R,F3,PDGFRA,PLAU,MYL9,PDPN	7/180
9_Member	GO Biological Processes	GO:0030168	platelet activation	-4.33591	-2.41878	558,2149,5156,10398,10630	AXL,F2R,PDGFRA,MYL9,PDPN	5/99
9_Member	GO Biological Processes	GO:0048771	tissue remodeling	-2.09123	-0.607644	558,1464,2149	AXL,CSPG4,F2R	3/104
10_Summary	GO Biological Processes	GO:0098609	cell-cell adhesion	-11.4015	-8.41574	90,214,301,302,1009,2650,3491,3688,5099,5156,7412,10398,10630,22801,57526,91179,91624,140885	ACVR1,ALCAM,ANXA1,ANXA2,CDH11,GCNT1,CCN1,ITGB1,PCDH7,PDGFRA,VCAM1,MYL9,PDPN,ITGA11,PCDH19,SCARF2,NEXN,SIRPA	18/-
10_Member	GO Biological Processes	GO:0098609	cell-cell adhesion	-11.4015	-8.41574	90,214,301,302,1009,2650,3491,3688,5099,5156,7412,10398,10630,22801,57526,91179,91624,140885	ACVR1,ALCAM,ANXA1,ANXA2,CDH11,GCNT1,CCN1,ITGB1,PCDH7,PDGFRA,VCAM1,MYL9,PDPN,ITGA11,PCDH19,SCARF2,NEXN,SIRPA	18/536
10_Member	GO Biological Processes	GO:0098742	cell-cell adhesion via plasma-membrane adhesion molecules	-6.00922	-3.81401	90,214,1009,3688,5099,7412,57526,91179,91624	ACVR1,ALCAM,CDH11,ITGB1,PCDH7,VCAM1,PCDH19,SCARF2,NEXN	9/261
10_Member	GO Biological Processes	GO:0007156	homophilic cell adhesion via plasma membrane adhesion molecules	-3.27433	-1.58004	1009,3688,5099,57526,91624	CDH11,ITGB1,PCDH7,PCDH19,NEXN	5/167
11_Summary	Canonical Pathways	M5884	NABA CORE MATRISOME	-11.3201	-8.35282	1280,1287,1289,1301,1302,1303,1490,2202,3491,6696,7057,8840,10516,83716,197,1009,1435,4015,5743,22801,57045,4192	COL2A1,COL4A5,COL5A1,COL11A1,COL11A2,COL12A1,CCN2,EFEMP1,CCN1,SPP1,THBS1,CCN4,FBLN5,CRISPLD2,AHSG,CDH11,CSF1,LOX,PTGS2,ITGA11,TWSG1,MDK	22/-
11_Member	Canonical Pathways	M5884	NABA CORE MATRISOME	-11.3201	-8.35282	1280,1287,1289,1301,1302,1303,1490,2202,3491,6696,7057,8840,10516,83716	COL2A1,COL4A5,COL5A1,COL11A1,COL11A2,COL12A1,CCN2,EFEMP1,CCN1,SPP1,THBS1,CCN4,FBLN5,CRISPLD2	14/275
11_Member	GO Biological Processes	GO:0001503	ossification	-10.0624	-7.29466	197,1009,1280,1301,1435,1490,3491,4015,5743,6696,8840,22801,57045	AHSG,CDH11,COL2A1,COL11A1,CSF1,CCN2,CCN1,LOX,PTGS2,SPP1,CCN4,ITGA11,TWSG1	13/279
11_Member	Canonical Pathways	M3008	NABA ECM GLYCOPROTEINS	-5.94161	-3.75846	1490,2202,3491,6696,7057,8840,10516,83716	CCN2,EFEMP1,CCN1,SPP1,THBS1,CCN4,FBLN5,CRISPLD2	8/196
11_Member	GO Biological Processes	GO:0061035	regulation of cartilage development	-4.97833	-2.94469	1490,2202,3491,4192,8840	CCN2,EFEMP1,CCN1,MDK,CCN4	5/73
11_Member	GO Biological Processes	GO:0032330	regulation of chondrocyte differentiation	-4.20837	-2.31418	1490,2202,4192,8840	CCN2,EFEMP1,MDK,CCN4	4/54
11_Member	GO Biological Processes	GO:0001649	osteoblast differentiation	-3.65486	-1.88714	3491,4015,6696,8840,22801	CCN1,LOX,SPP1,CCN4,ITGA11	5/138
12_Summary	GO Biological Processes	GO:0006954	inflammatory response	-11.0871	-8.15457	90,197,301,558,1435,2149,2152,3688,3725,3868,4192,5743,6347,6696,7057,7412,9173,84695,6935,7431,1280,1464,1948,302	ACVR1,AHSG,ANXA1,AXL,CSF1,F2R,F3,ITGB1,JUN,KRT16,MDK,PTGS2,CCL2,SPP1,THBS1,VCAM1,IL1RL1,LOXL3,ZEB1,VIM,COL2A1,CSPG4,EFNB2,ANXA2	24/-
12_Member	GO Biological Processes	GO:0006954	inflammatory response	-11.0871	-8.15457	90,197,301,558,1435,2149,2152,3688,3725,3868,4192,5743,6347,6696,7057,7412,9173,84695	ACVR1,AHSG,ANXA1,AXL,CSF1,F2R,F3,ITGB1,JUN,KRT16,MDK,PTGS2,CCL2,SPP1,THBS1,VCAM1,IL1RL1,LOXL3	18/560
12_Member	Reactome Gene Sets	R-HSA-6785807	Interleukin-4 and Interleukin-13 signaling	-6.61031	-4.28811	301,3688,5743,6347,6935,7412,7431	ANXA1,ITGB1,PTGS2,CCL2,ZEB1,VCAM1,VIM	7/108
12_Member	WikiPathways	WP2431	Spinal cord injury	-6.27362	-4.01602	301,1280,1464,1948,5743,6347,7431	ANXA1,COL2A1,CSPG4,EFNB2,PTGS2,CCL2,VIM	7/121
12_Member	Reactome Gene Sets	R-HSA-449147	Signaling by Interleukins	-5.54963	-3.40895	301,302,1435,3688,3725,5743,6347,6935,7412,7431,9173	ANXA1,ANXA2,CSF1,ITGB1,JUN,PTGS2,CCL2,ZEB1,VCAM1,VIM,IL1RL1	11/473
12_Member	Reactome Gene Sets	R-HSA-1280215	Cytokine Signaling in Immune system	-3.82538	-2.01821	301,302,1435,3688,3725,5743,6347,6935,7412,7431,9173	ANXA1,ANXA2,CSF1,ITGB1,JUN,PTGS2,CCL2,ZEB1,VCAM1,VIM,IL1RL1	11/730
13_Summary	GO Biological Processes	GO:0007507	heart development	-11.0616	-8.14545	90,1009,1280,1289,1301,1605,3491,3688,3725,3791,4015,5066,5156,6443,6444,7168,7412,23768	ACVR1,CDH11,COL2A1,COL5A1,COL11A1,DAG1,CCN1,ITGB1,JUN,KDR,LOX,PAM,PDGFRA,SGCB,SGCD,TPM1,VCAM1,FLRT2	18/-
13_Member	GO Biological Processes	GO:0007507	heart development	-11.0616	-8.14545	90,1009,1280,1289,1301,1605,3491,3688,3725,3791,4015,5066,5156,6443,6444,7168,7412,23768	ACVR1,CDH11,COL2A1,COL5A1,COL11A1,DAG1,CCN1,ITGB1,JUN,KDR,LOX,PAM,PDGFRA,SGCB,SGCD,TPM1,VCAM1,FLRT2	18/562
13_Member	GO Biological Processes	GO:0003007	heart morphogenesis	-6.03692	-3.83554	90,1280,1289,1301,1605,3491,3725,7168,23768	ACVR1,COL2A1,COL5A1,COL11A1,DAG1,CCN1,JUN,TPM1,FLRT2	9/259
14_Summary	GO Biological Processes	GO:0031589	cell-substrate adhesion	-10.9878	-8.08745	558,1009,1490,1605,2049,3688,7412,10516,10580,22801,79778,79834,1601	AXL,CDH11,CCN2,DAG1,EPHB3,ITGB1,VCAM1,FBLN5,SORBS1,ITGA11,MICALL2,PEAK1,DAB2	13/-
14_Member	GO Biological Processes	GO:0031589	cell-substrate adhesion	-10.9878	-8.08745	558,1009,1490,1605,2049,3688,7412,10516,10580,22801,79778,79834	AXL,CDH11,CCN2,DAG1,EPHB3,ITGB1,VCAM1,FBLN5,SORBS1,ITGA11,MICALL2,PEAK1	12/185
14_Member	GO Biological Processes	GO:0007160	cell-matrix adhesion	-8.43614	-5.86678	1009,1490,1605,3688,7412,10516,10580,22801,79834	CDH11,CCN2,DAG1,ITGB1,VCAM1,FBLN5,SORBS1,ITGA11,PEAK1	9/136
14_Member	GO Biological Processes	GO:1904375	regulation of protein localization to cell periphery	-2.75271	-1.15572	1601,1605,3688,10580	DAB2,DAG1,ITGB1,SORBS1	4/130
14_Member	GO Biological Processes	GO:1905475	regulation of protein localization to membrane	-2.27238	-0.750954	1601,1605,3688,10580	DAB2,DAG1,ITGB1,SORBS1	4/177
14_Member	GO Biological Processes	GO:0007229	integrin-mediated signaling pathway	-2.212	-0.702713	1490,3688,22801	CCN2,ITGB1,ITGA11	3/94
14_Member	WikiPathways	WP185	Integrin-mediated cell adhesion	-2.11432	-0.624149	3688,10580,22801	ITGB1,SORBS1,ITGA11	3/102
14_Member	GO Biological Processes	GO:1903076	regulation of protein localization to plasma membrane	-2.07987	-0.600423	1601,3688,10580	DAB2,ITGB1,SORBS1	3/105
15_Summary	GO Biological Processes	GO:0010810	regulation of cell-substrate adhesion	-10.0635	-7.29466	1435,1601,1605,3491,3791,4192,5054,5328,7057,10630,79834,90102,1287,6696,2049,23768,3688,5603	CSF1,DAB2,DAG1,CCN1,KDR,MDK,SERPINE1,PLAU,THBS1,PDPN,PEAK1,PHLDB2,COL4A5,SPP1,EPHB3,FLRT2,ITGB1,MAPK13	18/-
15_Member	GO Biological Processes	GO:0010810	regulation of cell-substrate adhesion	-10.0635	-7.29466	1435,1601,1605,3491,3791,4192,5054,5328,7057,10630,79834,90102	CSF1,DAB2,DAG1,CCN1,KDR,MDK,SERPINE1,PLAU,THBS1,PDPN,PEAK1,PHLDB2	12/222
15_Member	Canonical Pathways	M53	PID INTEGRIN3 PATHWAY	-7.75239	-5.24998	1287,3491,3791,5328,6696,7057	COL4A5,CCN1,KDR,PLAU,SPP1,THBS1	6/43
15_Member	GO Biological Processes	GO:0001952	regulation of cell-matrix adhesion	-7.44023	-4.98482	1435,1605,3791,5054,5328,7057,79834,90102	CSF1,DAG1,KDR,SERPINE1,PLAU,THBS1,PEAK1,PHLDB2	8/125
15_Member	GO Biological Processes	GO:0051893	regulation of focal adhesion assembly	-3.91853	-2.09085	3791,7057,79834,90102	KDR,THBS1,PEAK1,PHLDB2	4/64
15_Member	GO Biological Processes	GO:0090109	regulation of cell-substrate junction assembly	-3.91853	-2.09085	3791,7057,79834,90102	KDR,THBS1,PEAK1,PHLDB2	4/64
15_Member	GO Biological Processes	GO:0150116	regulation of cell-substrate junction organization	-3.79137	-1.99392	3791,7057,79834,90102	KDR,THBS1,PEAK1,PHLDB2	4/69
15_Member	GO Biological Processes	GO:1901888	regulation of cell junction assembly	-3.68007	-1.91006	2049,3791,7057,23768,79834,90102	EPHB3,KDR,THBS1,FLRT2,PEAK1,PHLDB2	6/214
15_Member	KEGG Pathway	hsa05205	Proteoglycans in cancer	-2.87554	-1.2572	3688,3791,5328,5603,7057	ITGB1,KDR,PLAU,MAPK13,THBS1	5/205
16_Summary	GO Biological Processes	GO:0061061	muscle structure development	-8.81177	-6.1455	58,90,467,1301,1605,3688,4015,5156,6443,6444,6525,7168,10398,22801,25802,7169,7412	ACTA1,ACVR1,ATF3,COL11A1,DAG1,ITGB1,LOX,PDGFRA,SGCB,SGCD,SMTN,TPM1,MYL9,ITGA11,LMOD1,TPM2,VCAM1	17/-
16_Member	GO Biological Processes	GO:0061061	muscle structure development	-8.81177	-6.1455	58,90,467,1301,1605,3688,4015,5156,6443,6444,6525,7168,10398,22801,25802	ACTA1,ACVR1,ATF3,COL11A1,DAG1,ITGB1,LOX,PDGFRA,SGCB,SGCD,SMTN,TPM1,MYL9,ITGA11,LMOD1	15/506
16_Member	KEGG Pathway	hsa05410	Hypertrophic cardiomyopathy	-7.15693	-4.7285	1605,3688,6443,6444,7168,7169,22801	DAG1,ITGB1,SGCB,SGCD,TPM1,TPM2,ITGA11	7/90
16_Member	KEGG Pathway	hsa05414	Dilated cardiomyopathy	-6.96252	-4.56926	1605,3688,6443,6444,7168,7169,22801	DAG1,ITGB1,SGCB,SGCD,TPM1,TPM2,ITGA11	7/96
16_Member	GO Biological Processes	GO:0007517	muscle organ development	-6.36952	-4.08271	58,467,1301,1605,3688,6443,6444,6525,7168,22801	ACTA1,ATF3,COL11A1,DAG1,ITGB1,SGCB,SGCD,SMTN,TPM1,ITGA11	10/309
16_Member	GO Biological Processes	GO:0060537	muscle tissue development	-5.11494	-3.05523	58,90,467,1301,3688,5156,6443,6444,7168	ACTA1,ACVR1,ATF3,COL11A1,ITGB1,PDGFRA,SGCB,SGCD,TPM1	9/336
16_Member	GO Biological Processes	GO:0035051	cardiocyte differentiation	-5.04059	-2.99194	90,3688,5156,6443,6444,7412	ACVR1,ITGB1,PDGFRA,SGCB,SGCD,VCAM1	6/122
16_Member	GO Biological Processes	GO:0048738	cardiac muscle tissue development	-5.00045	-2.96044	90,1301,3688,5156,6443,6444,7168	ACVR1,COL11A1,ITGB1,PDGFRA,SGCB,SGCD,TPM1	7/188
16_Member	WikiPathways	WP2118	Arrhythmogenic right ventricular cardiomyopathy	-4.92071	-2.89748	1605,3688,6443,6444,22801	DAG1,ITGB1,SGCB,SGCD,ITGA11	5/75
16_Member	GO Biological Processes	GO:0014706	striated muscle tissue development	-4.91183	-2.89473	90,1301,3688,5156,6443,6444,7168	ACVR1,COL11A1,ITGB1,PDGFRA,SGCB,SGCD,TPM1	7/194
16_Member	KEGG Pathway	hsa05412	Arrhythmogenic right ventricular cardiomyopathy	-4.86471	-2.85077	1605,3688,6443,6444,22801	DAG1,ITGB1,SGCB,SGCD,ITGA11	5/77
16_Member	GO Biological Processes	GO:0055007	cardiac muscle cell differentiation	-4.48908	-2.53735	90,3688,5156,6443,6444	ACVR1,ITGB1,PDGFRA,SGCB,SGCD	5/92
16_Member	KEGG Pathway	hsa05416	Viral myocarditis	-2.76296	-1.16519	1605,6443,6444	DAG1,SGCB,SGCD	3/60
16_Member	GO Biological Processes	GO:0055013	cardiac muscle cell development	-2.64419	-1.069	5156,6443,6444	PDGFRA,SGCB,SGCD	3/66
16_Member	GO Biological Processes	GO:0055006	cardiac cell development	-2.51957	-0.963053	5156,6443,6444	PDGFRA,SGCB,SGCD	3/73
16_Member	WikiPathways	WP4298	Acute viral myocarditis	-2.31934	-0.792693	1605,6443,6444	DAG1,SGCB,SGCD	3/86
17_Summary	GO Biological Processes	GO:0048545	response to steroid hormone	-8.77049	-6.12185	58,90,301,1490,1601,4015,4192,5066,5743,6696,7057,8031,1435,1512,1605,2650,6443,10580,558,5045,10516,56624	ACTA1,ACVR1,ANXA1,CCN2,DAB2,LOX,MDK,PAM,PTGS2,SPP1,THBS1,NCOA4,CSF1,CTSH,DAG1,GCNT1,SGCB,SORBS1,AXL,FURIN,FBLN5,ASAH2	22/-
17_Member	GO Biological Processes	GO:0048545	response to steroid hormone	-8.77049	-6.12185	58,90,301,1490,1601,4015,4192,5066,5743,6696,7057,8031	ACTA1,ACVR1,ANXA1,CCN2,DAB2,LOX,MDK,PAM,PTGS2,SPP1,THBS1,NCOA4	12/288
17_Member	GO Biological Processes	GO:0009725	response to hormone	-8.7005	-6.07727	58,90,301,1435,1490,1512,1601,1605,2650,4015,4192,5066,5743,6443,6696,7057,8031,10580	ACTA1,ACVR1,ANXA1,CSF1,CCN2,CTSH,DAB2,DAG1,GCNT1,LOX,MDK,PAM,PTGS2,SGCB,SPP1,THBS1,NCOA4,SORBS1	18/788
17_Member	GO Biological Processes	GO:0031960	response to corticosteroid	-4.28453	-2.3795	90,301,1490,4192,5066,5743	ACVR1,ANXA1,CCN2,MDK,PAM,PTGS2	6/166
17_Member	GO Biological Processes	GO:0051384	response to glucocorticoid	-3.59732	-1.83865	90,301,4192,5066,5743	ACVR1,ANXA1,MDK,PAM,PTGS2	5/142
17_Member	GO Biological Processes	GO:0032355	response to estradiol	-2.8804	-1.26125	301,1490,5066,5743	ANXA1,CCN2,PAM,PTGS2	4/120
17_Member	GO Biological Processes	GO:0060135	maternal process involved in female pregnancy	-2.722	-1.12884	5066,5743,6696	PAM,PTGS2,SPP1	3/62
17_Member	GO Biological Processes	GO:0046903	secretion	-2.31259	-0.786597	301,558,1490,5045,5066,5743,10516	ANXA1,AXL,CCN2,FURIN,PAM,PTGS2,FBLN5	7/526
17_Member	GO Biological Processes	GO:0031214	biomineral tissue development	-2.13792	-0.642897	4015,5743,6696	LOX,PTGS2,SPP1	3/100
17_Member	GO Biological Processes	GO:0001676	long-chain fatty acid metabolic process	-2.02483	-0.551229	5066,5743,56624	PAM,PTGS2,ASAH2	3/110
18_Summary	GO Biological Processes	GO:0006935	chemotaxis	-8.76541	-6.12185	214,301,1605,1948,2049,3491,4015,4192,5156,5328,6347,7412,23768,91624,219699,58,1009,3688,7168,10398,25802,3725,7431,79778,64102,302,6696	ALCAM,ANXA1,DAG1,EFNB2,EPHB3,CCN1,LOX,MDK,PDGFRA,PLAU,CCL2,VCAM1,FLRT2,NEXN,UNC5B,ACTA1,CDH11,ITGB1,TPM1,MYL9,LMOD1,JUN,VIM,MICALL2,TNMD,ANXA2,SPP1	27/-
18_Member	GO Biological Processes	GO:0006935	chemotaxis	-8.76541	-6.12185	214,301,1605,1948,2049,3491,4015,4192,5156,5328,6347,7412,23768,91624,219699	ALCAM,ANXA1,DAG1,EFNB2,EPHB3,CCN1,LOX,MDK,PDGFRA,PLAU,CCL2,VCAM1,FLRT2,NEXN,UNC5B	15/510
18_Member	GO Biological Processes	GO:0042330	taxis	-8.74239	-6.11088	214,301,1605,1948,2049,3491,4015,4192,5156,5328,6347,7412,23768,91624,219699	ALCAM,ANXA1,DAG1,EFNB2,EPHB3,CCN1,LOX,MDK,PDGFRA,PLAU,CCL2,VCAM1,FLRT2,NEXN,UNC5B	15/512
18_Member	GO Biological Processes	GO:0040011	locomotion	-8.53969	-5.94806	214,301,1605,1948,2049,3491,4015,4192,5156,5328,6347,7412,23768,91624,219699	ALCAM,ANXA1,DAG1,EFNB2,EPHB3,CCN1,LOX,MDK,PDGFRA,PLAU,CCL2,VCAM1,FLRT2,NEXN,UNC5B	15/530
18_Member	GO Biological Processes	GO:0032989	cellular component morphogenesis	-7.84927	-5.33427	58,214,1009,1605,1948,2049,3688,4192,5156,7168,10398,23768,25802,91624,219699	ACTA1,ALCAM,CDH11,DAG1,EFNB2,EPHB3,ITGB1,MDK,PDGFRA,TPM1,MYL9,FLRT2,LMOD1,NEXN,UNC5B	15/597
18_Member	GO Biological Processes	GO:0061564	axon development	-5.28802	-3.19524	214,1009,1605,1948,2049,3688,3725,23768,91624,219699	ALCAM,CDH11,DAG1,EFNB2,EPHB3,ITGB1,JUN,FLRT2,NEXN,UNC5B	10/408
18_Member	GO Biological Processes	GO:0007409	axonogenesis	-4.95369	-2.92425	214,1009,1605,1948,2049,3688,23768,91624,219699	ALCAM,CDH11,DAG1,EFNB2,EPHB3,ITGB1,FLRT2,NEXN,UNC5B	9/352
18_Member	GO Biological Processes	GO:0031175	neuron projection development	-4.85753	-2.84648	214,1009,1605,1948,2049,3688,3725,7431,23768,79778,91624,219699	ALCAM,CDH11,DAG1,EFNB2,EPHB3,ITGB1,JUN,VIM,FLRT2,MICALL2,NEXN,UNC5B	12/670
18_Member	GO Biological Processes	GO:0048858	cell projection morphogenesis	-4.72414	-2.73074	214,1009,1605,1948,2049,3688,4192,23768,91624,219699	ALCAM,CDH11,DAG1,EFNB2,EPHB3,ITGB1,MDK,FLRT2,NEXN,UNC5B	10/474
18_Member	GO Biological Processes	GO:0000904	cell morphogenesis involved in differentiation	-4.57891	-2.60248	214,1009,1605,1948,2049,3688,23768,64102,91624,219699	ALCAM,CDH11,DAG1,EFNB2,EPHB3,ITGB1,FLRT2,TNMD,NEXN,UNC5B	10/493
18_Member	GO Biological Processes	GO:0032990	cell part morphogenesis	-4.57146	-2.59686	214,1009,1605,1948,2049,3688,4192,23768,91624,219699	ALCAM,CDH11,DAG1,EFNB2,EPHB3,ITGB1,MDK,FLRT2,NEXN,UNC5B	10/494
18_Member	GO Biological Processes	GO:0007411	axon guidance	-4.54769	-2.57859	214,1605,1948,2049,23768,91624,219699	ALCAM,DAG1,EFNB2,EPHB3,FLRT2,NEXN,UNC5B	7/221
18_Member	GO Biological Processes	GO:0097485	neuron projection guidance	-4.54769	-2.57859	214,1605,1948,2049,23768,91624,219699	ALCAM,DAG1,EFNB2,EPHB3,FLRT2,NEXN,UNC5B	7/221
18_Member	GO Biological Processes	GO:0048667	cell morphogenesis involved in neuron differentiation	-4.3288	-2.41586	214,1009,1605,1948,2049,3688,23768,91624,219699	ALCAM,CDH11,DAG1,EFNB2,EPHB3,ITGB1,FLRT2,NEXN,UNC5B	9/423
18_Member	GO Biological Processes	GO:0000902	cell morphogenesis	-4.26381	-2.36191	214,1009,1605,1948,2049,3688,4192,23768,64102,91624,219699	ALCAM,CDH11,DAG1,EFNB2,EPHB3,ITGB1,MDK,FLRT2,TNMD,NEXN,UNC5B	11/651
18_Member	GO Biological Processes	GO:0048812	neuron projection morphogenesis	-4.02209	-2.17013	214,1009,1605,1948,2049,3688,23768,91624,219699	ALCAM,CDH11,DAG1,EFNB2,EPHB3,ITGB1,FLRT2,NEXN,UNC5B	9/464
18_Member	GO Biological Processes	GO:0120039	plasma membrane bounded cell projection morphogenesis	-3.98693	-2.14226	214,1009,1605,1948,2049,3688,23768,91624,219699	ALCAM,CDH11,DAG1,EFNB2,EPHB3,ITGB1,FLRT2,NEXN,UNC5B	9/469
18_Member	GO Biological Processes	GO:0071711	basement membrane organization	-3.79011	-1.99392	1605,3688,23768	DAG1,ITGB1,FLRT2	3/27
18_Member	GO Biological Processes	GO:0051960	regulation of nervous system development	-2.5843	-1.01855	302,1605,2049,3688,4192,6696,23768	ANXA2,DAG1,EPHB3,ITGB1,MDK,SPP1,FLRT2	7/469
18_Member	GO Biological Processes	GO:0051962	positive regulation of nervous system development	-2.24265	-0.726378	1605,2049,3688,4192,23768	DAG1,EPHB3,ITGB1,MDK,FLRT2	5/288
19_Summary	GO Biological Processes	GO:0061448	connective tissue development	-8.76179	-6.12185	1280,1289,1301,1302,1435,1490,3491,4015,6935,8091,57045,197,302,1009,5087,5156,8840,90,1303,2202,3688,10253,3791,5045	COL2A1,COL5A1,COL11A1,COL11A2,CSF1,CCN2,CCN1,LOX,ZEB1,HMGA2,TWSG1,AHSG,ANXA2,CDH11,PBX1,PDGFRA,CCN4,ACVR1,COL12A1,EFEMP1,ITGB1,SPRY2,KDR,FURIN	24/-
19_Member	GO Biological Processes	GO:0061448	connective tissue development	-8.76179	-6.12185	1280,1289,1301,1302,1435,1490,3491,4015,6935,8091,57045	COL2A1,COL5A1,COL11A1,COL11A2,CSF1,CCN2,CCN1,LOX,ZEB1,HMGA2,TWSG1	11/227
19_Member	GO Biological Processes	GO:0001501	skeletal system development	-8.04821	-5.51361	197,302,1009,1280,1301,1302,1490,3491,5087,5156,6935,8091,8840,57045	AHSG,ANXA2,CDH11,COL2A1,COL11A1,COL11A2,CCN2,CCN1,PBX1,PDGFRA,ZEB1,HMGA2,CCN4,TWSG1	14/490
19_Member	GO Biological Processes	GO:0051216	cartilage development	-6.38961	-4.09901	1280,1301,1302,1490,3491,6935,8091,57045	COL2A1,COL11A1,COL11A2,CCN2,CCN1,ZEB1,HMGA2,TWSG1	8/171
19_Member	GO Biological Processes	GO:0048598	embryonic morphogenesis	-6.27794	-4.01602	90,1280,1301,1303,2202,3491,3688,5087,5156,6935,8091,10253,57045	ACVR1,COL2A1,COL11A1,COL12A1,EFEMP1,CCN1,ITGB1,PBX1,PDGFRA,ZEB1,HMGA2,SPRY2,TWSG1	13/582
19_Member	GO Biological Processes	GO:0048568	embryonic organ development	-4.91782	-2.89665	90,1280,1301,2202,3491,3791,5087,5156,6935,10253	ACVR1,COL2A1,COL11A1,EFEMP1,CCN1,KDR,PBX1,PDGFRA,ZEB1,SPRY2	10/450
19_Member	GO Biological Processes	GO:0002062	chondrocyte differentiation	-4.73132	-2.73406	1280,1301,1490,8091,57045	COL2A1,COL11A1,CCN2,HMGA2,TWSG1	5/82
19_Member	GO Biological Processes	GO:0001502	cartilage condensation	-4.1906	-2.30248	1280,1301,1490	COL2A1,COL11A1,CCN2	3/20
19_Member	GO Biological Processes	GO:0098743	cell aggregation	-4.06248	-2.19648	1280,1301,1490	COL2A1,COL11A1,CCN2	3/22
19_Member	GO Biological Processes	GO:0048706	embryonic skeletal system development	-3.79136	-1.99392	1280,1301,5087,5156,6935	COL2A1,COL11A1,PBX1,PDGFRA,ZEB1	5/129
19_Member	GO Biological Processes	GO:0048562	embryonic organ morphogenesis	-3.78998	-1.99392	90,1280,1301,2202,5156,6935,10253	ACVR1,COL2A1,COL11A1,EFEMP1,PDGFRA,ZEB1,SPRY2	7/292
19_Member	GO Biological Processes	GO:0048704	embryonic skeletal system morphogenesis	-3.25935	-1.56698	1280,1301,5156,6935	COL2A1,COL11A1,PDGFRA,ZEB1	4/95
19_Member	GO Biological Processes	GO:0042472	inner ear morphogenesis	-3.14309	-1.4741	1280,1301,6935,10253	COL2A1,COL11A1,ZEB1,SPRY2	4/102
19_Member	GO Biological Processes	GO:0043009	chordate embryonic development	-2.96764	-1.3318	90,1280,1301,3491,3688,5045,5087,5156,6935	ACVR1,COL2A1,COL11A1,CCN1,ITGB1,FURIN,PBX1,PDGFRA,ZEB1	9/648
19_Member	GO Biological Processes	GO:0009792	embryo development ending in birth or egg hatching	-2.86746	-1.25074	90,1280,1301,3491,3688,5045,5087,5156,6935	ACVR1,COL2A1,COL11A1,CCN1,ITGB1,FURIN,PBX1,PDGFRA,ZEB1	9/670
19_Member	GO Biological Processes	GO:0042471	ear morphogenesis	-2.84088	-1.22818	1280,1301,6935,10253	COL2A1,COL11A1,ZEB1,SPRY2	4/123
19_Member	GO Biological Processes	GO:0048705	skeletal system morphogenesis	-2.68172	-1.09988	1280,1301,1490,5156,6935	COL2A1,COL11A1,CCN2,PDGFRA,ZEB1	5/227
19_Member	GO Biological Processes	GO:0007605	sensory perception of sound	-2.45658	-0.910479	1280,1301,1302,10253	COL2A1,COL11A1,COL11A2,SPRY2	4/157
19_Member	GO Biological Processes	GO:0050954	sensory perception of mechanical stimulus	-2.24683	-0.729917	1280,1301,1302,10253	COL2A1,COL11A1,COL11A2,SPRY2	4/180
19_Member	GO Biological Processes	GO:0048839	inner ear development	-2.15722	-0.658952	1280,1301,6935,10253	COL2A1,COL11A1,ZEB1,SPRY2	4/191
20_Summary	GO Biological Processes	GO:0050865	regulation of cell activation	-8.15729	-5.60913	301,558,1490,1948,2615,4192,5156,6347,6935,7057,7412,9173,10630,57045,84695,140885,2049,2650,1435,2149,5054,5743,7431,4015,5603,10253,56624,197	ANXA1,AXL,CCN2,EFNB2,LRRC32,MDK,PDGFRA,CCL2,ZEB1,THBS1,VCAM1,IL1RL1,PDPN,TWSG1,LOXL3,SIRPA,EPHB3,GCNT1,CSF1,F2R,SERPINE1,PTGS2,VIM,LOX,MAPK13,SPRY2,ASAH2,AHSG	28/-
20_Member	GO Biological Processes	GO:0050865	regulation of cell activation	-8.15729	-5.60913	301,558,1490,1948,2615,4192,5156,6347,6935,7057,7412,9173,10630,57045,84695,140885	ANXA1,AXL,CCN2,EFNB2,LRRC32,MDK,PDGFRA,CCL2,ZEB1,THBS1,VCAM1,IL1RL1,PDPN,TWSG1,LOXL3,SIRPA	16/657
20_Member	GO Biological Processes	GO:0022407	regulation of cell-cell adhesion	-6.22839	-3.98469	301,1948,2049,2615,2650,4192,6347,7412,10630,57045,84695,140885	ANXA1,EFNB2,EPHB3,LRRC32,GCNT1,MDK,CCL2,VCAM1,PDPN,TWSG1,LOXL3,SIRPA	12/492
20_Member	GO Biological Processes	GO:0002694	regulation of leukocyte activation	-6.12987	-3.9127	301,558,1948,2615,4192,6347,6935,7057,7412,9173,57045,84695,140885	ANXA1,AXL,EFNB2,LRRC32,MDK,CCL2,ZEB1,THBS1,VCAM1,IL1RL1,TWSG1,LOXL3,SIRPA	13/600
20_Member	GO Biological Processes	GO:0032496	response to lipopolysaccharide	-6.03902	-3.83554	558,1435,1948,2149,5054,5743,6347,7412,7431,140885	AXL,CSF1,EFNB2,F2R,SERPINE1,PTGS2,CCL2,VCAM1,VIM,SIRPA	10/336
20_Member	GO Biological Processes	GO:0002237	response to molecule of bacterial origin	-5.80219	-3.62787	558,1435,1948,2149,5054,5743,6347,7412,7431,140885	AXL,CSF1,EFNB2,F2R,SERPINE1,PTGS2,CCL2,VCAM1,VIM,SIRPA	10/357
20_Member	GO Biological Processes	GO:0050863	regulation of T cell activation	-5.5808	-3.42919	301,1948,2615,4192,6347,6935,7412,57045,84695,140885	ANXA1,EFNB2,LRRC32,MDK,CCL2,ZEB1,VCAM1,TWSG1,LOXL3,SIRPA	10/378
[truncated: 20 more rows]

## Sheet: WT_D4_D3_total
GroupID	Category	Term	Description	LogP	Log(q-value)	Genes	Symbols	InTerm_InList
[truncated: 259 more rows]

## Sheet: WT_D4_D3_UP
GroupID	Category	Term	Description	LogP	Log(q-value)	Genes	Symbols	InTerm_InList
[truncated: 205 more rows]

[truncated: 3 more sheets: WT_D4_D3_DOWN, Δ9_D4_D3_total, Δ9_D4_D3_DOWN]
